# Supplementary material for: The protein phosphatase 2C domain contributes to the pathobiological function of adenylyl cyclase in Cryptococcus neoformans
Source: bioRxiv preprint, doi:10.64898/2025.12.10.693573, version 1 (2025-12-11)
Supplement: Suplemental Data 1 [file 693573_file13.xlsx]

## Sheet: Index
	Supplementary Data 1. Transcriptomic analysis of CAC1 1. genecountmatrix: Gene count matrix from the transcriptome analysis. WT indicateds wild-type, WT; CAC1_ko indicates whole-gene knockout, cac1Δ; CAC1_com indicates complemented strain, cac1Δ::CAC1; CAC1_AC indicates ACC-domain knockout, CAC1ACCΔ; CAC1_PP indicates PP2C-domain knockout, CAC1PP2CΔ; _m indicates MM medium (minimal medium without…

## Sheet: genecountmatrix
Geneid	WT_g_1	WT_g_2	WT_g_3	WT_m_1	WT_m_2	WT_m_3	CAC1_ko_g_1	CAC1_ko_g_2	CAC1_ko_g_3	CAC1_ko_m_1	CAC1_ko_m_2	CAC1_ko_m_3	CAC1_com_g_1	CAC1_com_g_2	CAC1_com_g_3	CAC1_com_m_1	CAC1_com_m_2	CAC1_com_m_3	CAC1_PP_g_1	CAC1_PP_g_2	CAC1_PP_g_3	CAC1_PP_m_1	CAC1_PP_m_2	CAC1_PP_m_3	CAC1_AC_g_1	CAC1_AC_g_2	CAC1_AC_g_3	CAC1_AC_m_1	CAC1_AC_m_2	CAC1_AC_m_3
CNAG_04548	95	80	66	1504	2782	1746	124	100	192	1269	1172	863	81	139	99	2733	1749	1497	78	172	133	1415	1511	912	93	251	134	1548	970	1467
CNAG_07303	176	146	107	1309	2193	1297	292	242	358	1035	966	903	194	332	217	2342	1703	1427	181	282	199	1319	1427	830	289	616	284	1259	877	1148
CNAG_07304	1862	2065	1791	5006	6582	4845	2485	2519	2770	7046	4521	5632	2199	3288	2138	6939	5993	3773	1762	2116	2084	3948	4234	4862	1788	4575	2137	6093	5446	5196
CNAG_00001	802	782	711	1655	1938	1446	966	807	956	1629	1041	1522	739	1349	837	2110	2120	1109	756	795	709	1013	916	1257	622	1579	861	1431	1294	1388
CNAG_07305	515	600	427	1060	1614	1139	365	478	699	1007	943	780	606	665	621	1677	1158	893	572	643	643	773	899	804	499	1017	424	1158	1012	1118
CNAG_00002	2223	2850	2048	1928	3059	2077	3510	2367	3852	2211	1937	1904	2830	4273	2471	2481	2027	1937	2329	4032	2689	1186	1642	1906	2242	5524	2666	2190	2044	1771
CNAG_00003	1540	1194	1244	2763	4862	3430	1331	1160	2105	3041	2997	2314	1624	1594	1587	4567	2671	2464	1346	1635	1481	2125	2562	2517	1288	2974	1653	4407	3541	3816
CNAG_00004	5284	5150	4568	7832	13641	8843	5677	5250	7061	11335	8256	8597	6625	7572	5925	12373	8932	6805	4871	5463	5150	7239	8019	7367	4451	11474	5736	11893	9164	11177
CNAG_00005	138	140	111	2095	3856	2357	111	93	109	680	705	570	180	153	105	3310	2185	1923	106	120	106	1069	1135	806	70	224	93	883	701	851
CNAG_12000	0	0	0	0	0	0	0	0	0	0	0	0	0	0	0	0	0	0	0	0	0	0	0	0	0	0	0	0	0	0
CNAG_12001	513	468	425	1444	2212	1652	472	561	683	1464	1156	1445	492	674	507	2124	1531	1369	475	560	507	687	926	1204	411	699	397	1407	1277	1159
CNAG_00006	11893	12791	11359	10774	18112	12410	11414	12709	16876	11294	9964	8425	15060	18245	14447	16097	11361	9569	12424	15399	13434	9653	11113	10773	10729	25959	12160	12623	10682	10922
CNAG_00007	9277	9216	7954	6007	9102	6127	8798	8127	11505	3882	3104	2922	10344	12238	9649	8102	6067	5389	9457	10678	9451	4269	5244	5144	7480	17595	8667	4317	3584	3756
CNAG_00008	7587	7107	6934	7369	11401	7697	7910	8094	8337	7754	5190	6670	9116	11111	8030	10853	8112	6057	6327	6935	7258	6408	7030	7254	6079	15361	7320	7170	7205	7291
CNAG_00009	2891	2201	2348	2117	3078	2238	3994	2505	3139	1768	1189	1684	2331	3691	2398	2904	2411	1858	2224	2478	2028	1402	1746	1827	1782	4334	2152	1694	1669	1629
CNAG_00010	8734	8704	8176	8453	12086	8942	13247	9367	12168	12005	8214	9306	9482	12258	8442	12107	9281	6481	8097	9376	9526	7688	8146	10425	8170	20984	9879	13251	9919	10956
CNAG_00011	16368	18081	15598	10470	17152	10233	19908	22595	26066	18128	14121	14925	21977	29802	22192	14114	11504	8547	17934	23802	19920	9304	10426	11348	16941	39727	19253	18391	15331	16408
CNAG_00012	6041	5625	5756	7763	13755	9794	4992	5437	7654	6343	4687	4774	7546	8120	7145	12999	8443	7197	5786	6363	6649	5112	6543	7359	5395	13363	6754	6245	7498	5378
CNAG_00013	2663	2734	2429	1967	3425	2123	2337	2353	2870	2056	1583	1712	3303	4140	3166	2930	2213	1991	2282	3209	2562	1558	1977	1626	1997	4812	2455	2197	1951	1899
CNAG_00014	2076	2109	2095	3174	5353	3423	2679	2143	2890	4442	3130	3656	2700	3377	2632	4451	3541	2565	1906	2399	2308	2616	3164	3369	1721	4197	2260	4379	4074	4060
CNAG_00015	1388	1437	1262	7962	11792	7418	3193	3126	2985	8875	6753	8787	1528	2809	1644	9392	9457	6165	1565	2272	1805	5765	6874	5861	1975	4315	2157	8137	6230	6526
CNAG_00016	6536	8309	6341	5004	8382	5402	8920	8235	9306	6809	5098	6553	8673	13809	8975	6684	5951	4726	7001	10164	7669	4808	5520	5813	6376	14758	6781	6506	4803	5204
CNAG_00017	1128	1253	1103	1110	1578	1333	1547	1294	1332	1831	958	1454	1364	2206	1274	1586	1357	884	1027	1238	1118	1024	1189	1390	876	2381	1148	1371	1166	1256
CNAG_12002	70	102	47	134	153	88	82	114	121	220	155	245	95	116	106	129	111	103	61	51	91	124	114	128	75	145	79	221	130	187
CNAG_00018	5416	4530	4729	4961	8268	5750	4292	4032	5339	4978	3649	3628	5793	6858	5212	7755	5608	4751	4020	4858	4714	3842	4363	4425	3617	8950	4487	4820	4780	4471
CNAG_00019	7821	9362	7979	5747	8722	5865	10799	9321	12222	5817	5076	4974	9127	13882	9018	7022	5563	4497	10661	12735	10287	4016	4596	5075	8722	19831	9623	6308	4517	5142
CNAG_00020	4776	4534	4382	2964	4920	3100	5257	5501	5227	3162	1894	2682	5687	7212	4701	4666	3358	2532	4154	4125	4761	2267	2528	2754	3912	9795	4556	2657	2648	2542
CNAG_12003	63	95	57	185	248	166	35	61	91	340	355	336	95	125	74	252	200	105	62	72	48	348	297	233	54	149	65	342	154	413
CNAG_00021	1914	2125	1849	1397	1641	1318	1951	1719	2146	1111	858	859	2199	2688	1932	1779	1342	887	1661	1756	1978	1322	1392	1594	1502	3578	1647	1454	995	1082
CNAG_12004	9	7	5	19	11	15	10	12	13	92	29	12	14	25	14	24	39	2	12	11	16	34	41	13	8	16	13	35	30	59
CNAG_00022	4202	4581	3685	3228	4569	3163	5065	4308	5977	3065	2805	3074	4823	6725	4592	3949	3263	2674	4165	5983	4555	2229	2861	2634	3719	8803	4107	3334	2806	3019
CNAG_00023	1669	1723	1507	985	1534	1142	1889	2118	2086	2326	1449	1762	2106	3006	1989	1322	1088	790	1682	2052	1882	1164	1344	1307	1369	3239	1568	1867	1614	1731
CNAG_00024	35360	32524	29641	27001	34358	25036	40771	35462	39180	47335	31438	39088	37187	50647	33584	36151	27263	18785	29260	31085	32590	40519	36603	37916	27235	70005	34570	49320	31426	43342
CNAG_00025	10701	9234	9296	16200	23673	16863	9270	8212	10958	11497	10237	8046	11623	13649	11164	22218	15322	12790	8039	9004	8621	15820	15269	13919	7056	16289	8281	16435	10140	12778
CNAG_00026	12811	12975	12198	5676	8690	6270	9522	7657	12462	4738	3830	3767	13790	15929	12396	8050	5670	4855	11191	13120	12019	4477	5260	5561	8367	20100	10321	5829	4977	4709
CNAG_00027	3553	3315	3141	3580	6368	4127	3641	4092	4064	6544	4569	5450	3989	5100	3825	6106	4392	3140	2879	2986	3351	4215	4676	4271	2946	6949	3518	6379	5289	5920
CNAG_00028	2278	2487	2220	4914	9051	6113	2504	2290	3627	4418	4212	3797	2997	3217	2848	8330	5089	4743	2441	2887	2756	3186	3618	3947	2258	5919	3071	5380	4852	5426
CNAG_00029	466	522	394	282	492	401	620	551	858	496	295	382	467	627	550	439	288	304	495	600	514	174	254	336	470	1148	491	445	473	343
CNAG_00030	381	381	317	566	1033	639	429	300	597	546	514	433	420	520	379	818	674	565	355	402	389	461	489	458	278	735	397	730	552	661
CNAG_00031	2558	2308	2144	4208	8046	5085	2566	2149	3172	4032	3141	3262	2976	3431	2809	7361	4809	3715	2205	2699	2355	3217	3786	3693	2087	4752	2459	4487	4055	4234
CNAG_00032	373	398	320	1189	2291	1555	350	363	573	1192	954	1100	524	574	510	1779	1417	1025	325	424	360	739	924	1004	364	906	351	1311	1204	1237
CNAG_00033	52	43	23	208	281	194	44	70	57	110	76	165	51	77	51	281	175	142	56	39	37	80	133	161	35	87	28	128	117	108
CNAG_07306	54	59	68	312	426	370	123	111	117	354	188	318	74	90	92	392	330	192	91	62	67	166	188	279	52	144	75	183	221	202
CNAG_00034	69102	67333	64089	11397	18379	14564	42293	32897	72516	6711	6337	4226	71816	70066	66845	18003	11148	10758	60289	65324	64923	7741	9536	10495	47599	110235	58985	8770	7704	6762
CNAG_00035	2051	1727	1677	2997	4814	3155	2396	2707	2116	4190	2468	3817	2510	3496	2133	4679	3754	2436	1424	1818	1610	3013	2922	2638	1658	3834	1821	3693	2873	3539
CNAG_00036	3070	3363	2998	7702	13696	8926	3146	3259	4417	10801	9008	8829	4054	4757	3934	11368	8281	6624	2282	2965	2940	9725	9770	8775	3132	7428	4032	12390	8624	11024
CNAG_07307	76	105	89	141	190	160	265	159	217	671	470	684	104	205	112	189	178	155	134	151	104	242	264	263	98	306	129	523	367	515
CNAG_00038	5265	6197	4670	3468	5234	3724	6666	5497	8400	5952	4257	4654	6520	9743	6053	4864	3706	2733	5824	8093	6329	3226	3572	4233	5287	13112	6223	5902	4139	4862
CNAG_12005	92	109	100	859	1142	711	210	336	296	1725	1250	1613	102	207	100	867	745	597	179	148	132	959	981	1011	128	356	155	1564	937	1171
CNAG_00039	5683	4970	5251	9582	10477	8180	6684	6126	6328	9448	6681	7578	5759	8054	5386	10895	9245	6057	4645	4354	4595	12353	10657	10745	4164	10334	5229	11176	7613	8887
CNAG_00040	13334	11366	10798	6447	9796	7111	15823	16669	18956	4828	3619	3505	14311	17077	12260	10208	7141	5798	13768	14136	14997	4952	5504	5536	11247	28905	14772	5224	4273	4214
CNAG_07308	298	365	321	840	1484	912	213	346	362	4624	3416	3597	500	526	431	1352	868	579	239	259	288	3421	2857	1744	269	718	325	4918	2421	4828
CNAG_12006	66	106	84	686	1328	760	96	84	84	1547	1222	1517	101	141	90	1213	826	583	59	50	61	1801	1483	1138	54	168	66	1697	660	1849
CNAG_00043	3986	4095	3470	5061	8576	6232	4267	4059	4987	8385	5796	6871	4929	6425	4828	8104	6012	4323	3461	4285	4135	5359	5850	5873	3290	8388	4122	7914	6553	7759
CNAG_00044	9702	8819	8536	5835	10385	6758	7961	7875	11986	8805	7232	6265	11180	11850	10154	9209	6307	5300	8662	9016	9744	6605	7342	6208	8104	19774	9994	10136	8278	9730
CNAG_00045	2339	2257	2171	4110	7142	4622	1892	2520	3740	4293	3990	3412	3231	3342	3101	6398	4157	3875	2199	3036	2812	3218	4073	3824	2484	6151	2964	5389	4501	5170
CNAG_00046	11831	13255	11259	5001	8638	5737	12907	12409	14623	5809	4219	4704	15082	19876	14167	7696	5706	4492	11282	13916	13166	4481	5447	5194	9813	24069	11496	5846	5217	5073
CNAG_00047	5443	4748	4502	22582	31674	24216	6313	8720	9742	15912	13437	12806	6364	7441	6512	29731	21086	20022	6256	7167	6276	16451	20446	18022	5890	14082	6915	17302	16180	14474
CNAG_00048	376	453	324	753	1240	847	451	453	675	837	669	692	508	657	454	1089	819	831	472	510	493	559	833	745	400	1006	627	736	974	599
CNAG_12007	103	76	96	531	817	697	145	105	140	362	321	325	84	174	102	585	503	802	179	124	77	277	502	315	75	142	63	396	274	253
CNAG_00049	777	692	706	595	1240	765	752	660	1390	603	539	564	945	1102	988	881	661	508	817	1131	881	360	477	618	879	1882	1031	537	789	503
CNAG_12008	23	48	23	8	34	12	34	48	40	13	16	9	62	59	48	38	11	32	26	72	33	11	12	10	26	91	29	19	12	1
CNAG_00050	1493	1464	1369	815	1104	712	1720	1552	1937	578	453	444	1782	2340	1549	1015	823	745	1457	1628	1481	508	644	547	1256	3069	1513	597	361	443
CNAG_00051	11684	9914	9771	10127	15007	10037	11262	10840	12320	23865	15916	19305	12458	14728	10851	15001	10322	8063	8660	9772	10073	15063	16033	12603	8796	21618	10918	21605	18063	21565
CNAG_00052	692	1058	730	1469	2662	1736	357	645	425	11762	9301	9959	1057	1800	1009	2074	1389	1068	356	579	451	8294	7268	4832	393	917	429	12947	4814	10780
CNAG_00053	1040	625	641	1462	1461	1348	1658	775	1636	505	547	541	431	796	575	1124	1224	1554	1080	1164	618	423	558	534	735	1343	707	619	547	488
CNAG_00054	2736	3402	2985	3982	6463	4353	3503	4893	4129	14339	9994	11953	4711	5970	3734	5948	4117	3203	2414	2918	2661	7986	7823	5110	2965	7460	3556	15037	7932	14135
CNAG_00055	5887	4941	4916	6986	11228	8323	4937	4706	6462	8193	5902	6041	6414	7148	5885	11700	7260	6322	5033	5764	5612	5030	6360	6708	4520	11042	5306	7898	8117	7635
CNAG_00056	4356	3929	3924	2810	4897	3022	4225	4194	4888	4640	3020	3957	5196	6480	4543	4576	3410	2183	3553	3994	3981	3148	3076	3077	3393	8806	4355	4039	3648	4197
CNAG_00057	22516	22356	20983	34678	53735	43285	22330	19092	36761	17407	18297	11629	27048	26939	23092	50116	31404	34202	21071	23528	23906	32822	39065	26908	24329	59125	31075	25631	15771	19302
CNAG_00058	15573	13807	13175	6116	10485	7384	12671	9760	17924	4804	4433	3408	16326	17526	14933	9837	6188	5795	13779	14749	15142	5204	6127	5650	11901	28564	14618	6250	5827	5300
CNAG_00059	915	1084	783	1450	2263	1429	1740	1358	1390	1587	964	1544	1042	1893	950	1828	1814	1166	904	1354	1059	898	1168	1399	807	2203	956	1188	1023	822
CNAG_00060	2980	3400	2930	3461	4407	3330	2732	2323	3251	4799	3550	3703	3476	4157	3308	4316	3280	2425	2654	2866	3074	4227	4359	4011	2129	5413	2664	5034	3176	4793
CNAG_00061	68663	58821	57306	98060	171135	127509	38646	35051	58837	45204	40346	30604	71154	73176	65206	165628	100937	95445	50228	49544	53723	63174	85121	70700	39701	99028	51350	53813	49805	47285
CNAG_00062	10631	10393	9508	5237	8739	5821	10670	9781	12149	5342	3908	4451	12201	15267	11254	7602	5685	4464	9075	10305	10455	4623	5244	5272	8085	20788	10188	5804	5139	5042
CNAG_00063	1477	974	894	1364	1466	1155	1158	1001	1012	795	568	703	1004	1542	941	1395	1398	1068	888	1062	948	509	679	777	789	1762	982	781	786	646
CNAG_00064	7463	8291	6749	2584	5168	3393	7523	6350	11152	2540	2700	2094	9257	11491	8837	3892	2719	2843	7689	12817	8745	2057	2674	2340	6728	15568	8326	3440	3098	3098
CNAG_00065	22518	20715	20275	8270	13420	9777	19369	16399	26464	10339	8109	7128	24875	27579	23721	12839	8000	7454	19971	22185	21977	5968	6958	8323	17440	42708	21779	11659	10013	10500
CNAG_00066	16838	15128	15248	19415	30502	21119	13198	16455	17824	17708	12116	14057	21820	24727	19611	30443	20922	15957	12930	15065	16202	18157	20745	20573	12412	32483	15633	16865	16431	16068
CNAG_00067	9107	10794	8770	7228	12545	9009	11533	9119	13667	7269	6348	6601	11735	17646	11302	9630	7939	7622	10176	16086	10877	4867	6039	7764	8492	19491	9645	7373	7383	6164
CNAG_12009	202	223	205	373	641	542	242	349	422	738	876	579	268	403	263	488	330	382	280	416	289	293	321	345	222	523	286	1040	579	881
CNAG_12010	11	4	6	96	200	119	22	32	25	287	219	344	21	18	17	152	115	94	20	22	17	122	117	183	5	33	17	227	270	186
CNAG_12011	10	43	16	46	36	58	61	22	25	19	35	35	23	39	19	64	39	46	82	61	21	39	35	30	15	46	11	40	19	24
CNAG_12012	0	0	0	0	0	0	0	0	0	0	0	0	0	0	0	0	0	0	0	0	0	0	0	0	0	0	0	0	0	0
CNAG_00068	3126	3011	2954	7118	7825	5928	2526	2576	2630	2744	1797	2229	3348	4621	3275	8125	6898	4739	2266	2483	2437	4128	4304	4726	1755	4431	2136	3039	2282	2514
CNAG_12013	23	54	31	99	74	102	164	118	195	120	130	137	38	67	36	85	63	58	94	142	79	83	125	155	122	234	93	195	102	108
CNAG_00069	0	0	0	0	0	0	0	0	0	0	0	0	0	0	0	0	0	0	0	0	0	0	0	0	0	0	0	0	0	0
CNAG_00070	6836	6466	6325	7868	10716	7508	9325	8771	8972	8836	5632	7726	8587	12255	7780	9793	8698	5720	6322	6999	7353	6624	7278	8455	6135	15866	7422	7459	6956	7070
CNAG_00072	13293	12018	11742	7740	14295	9515	9870	10422	16005	9095	8307	6234	16204	15632	14585	13134	7726	7219	12210	13047	13156	8322	9260	7433	10450	25560	13858	10871	9356	9975
CNAG_00073	16018	15980	15068	10766	17368	11737	15217	15531	19097	16855	11789	13017	20130	25345	18455	16149	11929	8610	13175	16545	16260	12554	13616	12672	13117	33065	15697	16475	13222	15534
CNAG_00074	18725	15937	15858	10162	17664	11828	12234	14330	21407	16690	15934	11837	23048	22860	21280	15700	9885	9151	15766	19778	17699	17798	17439	11735	13743	31923	17057	21512	14253	19240
CNAG_00075	5373	6688	5007	2757	5299	3111	4831	5438	5903	5862	5048	4831	6492	10408	6531	4171	3050	2495	4206	6966	4779	4824	4574	4006	4569	9766	4512	6265	3649	5047
CNAG_00076	2775	2661	2235	1245	1871	1485	2834	2350	3496	1782	1456	1564	3093	3370	2900	1833	1182	1010	2427	2652	2626	1863	1745	1471	2404	6132	3067	2138	1540	1878
CNAG_07947	848	1049	763	515	709	413	1453	1252	1524	1968	1503	1439	835	1555	847	582	423	381	1052	1270	887	714	622	650	881	2059	984	2132	754	1961
CNAG_00077	32909	31513	30918	6557	6261	6026	25412	23741	31558	6473	5830	4374	38328	45242	34138	8241	5215	3646	28024	27699	30673	10289	8829	9414	22384	56727	29142	8893	4390	6762
CNAG_00078	7242	6312	6204	5245	9800	6836	5607	4465	7523	4479	4139	3215	7499	7717	6398	8815	5670	5044	5676	6323	5979	4551	5296	5579	4489	11128	5863	6025	5485	4917
CNAG_12014	30	51	25	221	451	320	115	105	224	742	671	713	33	53	39	322	294	213	60	75	75	354	369	290	148	239	99	898	521	810
CNAG_00079	3031	2467	2300	13922	21137	14500	3878	2907	3186	9734	6330	9756	2693	4412	2661	17670	15629	11527	2303	2592	2273	8996	11486	9750	1989	5096	2368	8705	7581	8616
CNAG_00080	240	283	214	225	219	248	274	200	359	330	203	328	255	449	270	369	256	179	277	351	232	190	180	251	207	523	222	310	194	272
CNAG_00081	9067	8092	7869	7765	12675	8417	7894	7427	10575	8506	6995	6524	10172	11177	9387	11866	7519	6794	7528	8246	8513	7748	7943	7514	7202	17473	9165	10526	8180	8523
CNAG_00082	4740	4690	4453	3086	4984	3311	4098	3858	6121	2970	2697	2395	5844	7015	5738	4160	3384	2787	4594	5291	4890	2570	2810	2632	3653	8936	4542	3788	2712	3168
CNAG_00083	6181	5936	5866	4545	7117	5090	6935	6364	7314	5811	3883	5272	7171	9377	6551	6993	5014	3940	5293	6250	6388	3637	4248	4856	5027	12570	5950	5762	4999	5028
CNAG_00084	6644	6076	6097	6012	8551	6212	5616	5006	7439	4473	3893	3146	7172	7492	6020	8408	5588	4774	5968	5843	6553	5894	5541	5054	5086	12438	6493	6284	4150	4932
CNAG_00085	1092	789	755	722	861	689	905	748	1221	445	359	408	778	951	882	921	591	623	884	927	1028	285	378	354	828	1809	928	429	362	403
CNAG_00086	2370	2352	2068	1567	1950	1729	2474	1627	2905	1075	827	791	2243	2783	1935	2197	1495	1076	2310	2275	2396	1274	1459	2078	1717	4457	2186	1544	1059	1137
CNAG_00087	7669	7250	6936	4573	7456	4896	6479	7108	8879	7379	5403	5518	9148	11064	8341	7091	4971	3733	6214	7301	7426	5559	6000	5216	6138	15065	7400	7539	6474	6958
CNAG_00088	14065	14886	12839	15495	30341	19526	11728	12239	22237	11168	13153	9039	17754	21334	18488	23274	14765	16667	16637	23184	15962	11880	15015	13548	14112	30933	16111	16195	13859	13361
CNAG_00089	3699	3715	3364	3071	4213	3387	3043	2658	4575	2452	2210	1720	3967	4785	3885	4017	2790	2431	3728	4195	3718	2661	2825	2831	3159	7199	3474	3013	2243	2518
CNAG_00090	3325	2823	2923	3876	5880	4010	2920	2081	4127	3643	3807	3104	3271	3669	3246	5128	3716	3523	2884	3594	2975	3321	3520	3094	2455	5949	2960	4962	3514	4227
CNAG_00091	72968	82032	74305	32829	64619	40139	26773	42189	61235	398793	331949	270086	126314	128549	105434	64602	29940	23411	50582	69807	70290	278575	236189	146079	49072	121110	57727	471869	220782	487172
CNAG_00092	10503	10344	9835	9704	17653	11721	7690	7392	12982	6271	6262	5279	12067	14082	12114	13853	9424	8987	11398	13872	10952	5934	7627	8547	8552	18549	10200	7310	7919	6184
CNAG_00093	22563	22799	21265	12561	23201	14263	19841	24554	27771	55040	42577	40136	30026	33722	26585	20831	12716	8948	17338	21652	22784	41949	37450	25474	21415	52568	24832	60266	33934	59428
CNAG_00094	1101	937	850	17286	26935	21379	964	976	1163	13134	11237	10828	1047	1264	1129	25211	17940	16133	1071	934	922	11832	14480	15947	677	1785	1021	14612	14369	12732
CNAG_00095	0	0	0	0	0	0	0	0	0	0	0	0	0	0	0	0	0	0	0	0	0	0	0	0	0	0	0	0	0	0
CNAG_00096	1414	1511	1361	3417	5789	3765	1465	1374	1687	4662	3278	4449	1708	2249	1726	5088	4222	2915	1115	1239	1321	3041	3095	3248	1080	2796	1369	4668	3583	4027
CNAG_00097	2193	1871	2007	2894	4904	3094	2133	2511	3201	2686	2044	2076	2584	2912	2470	4297	2895	2474	2084	2168	2308	2305	2714	2467	2102	4981	2467	2779	2884	2543
CNAG_12015	86	124	59	95	150	99	111	107	151	98	105	167	104	177	95	170	130	93	89	136	78	81	81	101	46	195	87	122	105	140
CNAG_00098	3098	3164	2828	2846	6170	3717	2265	2849	4034	5923	5653	4121	4290	4624	4097	4732	3042	2830	2714	3567	3118	4732	4821	3612	2894	6305	3096	7681	4813	6951
CNAG_00099	4246	3662	3485	1763	1924	1665	4418	3505	5430	706	510	527	4255	4662	3665	1920	1408	1367	3900	3979	4443	590	862	955	3650	8758	4443	685	1007	676
CNAG_00100	21012	18652	17808	16323	28369	20124	14248	13056	20273	13226	10413	10272	22546	25091	20475	27302	17312	15119	17543	18857	20056	12468	15762	13839	13786	36450	18529	12983	13764	12228
CNAG_00101	3203	3359	2729	1807	2830	2090	4148	3020	4405	1847	1608	1552	3485	5244	3292	2176	1935	1783	3434	4714	3557	1130	1435	1623	2914	6750	3292	1649	1876	1652
CNAG_07309	5406	5955	5405	4464	8548	5747	3846	4861	6732	7058	6012	5389	7515	7851	6854	7277	4622	4157	4935	6155	5860	6795	7247	5474	4931	12005	5820	7916	5727	7693
CNAG_07310	4094	4938	4004	4482	7747	5176	3256	3705	5535	5914	5014	4641	5519	6163	5313	6447	4651	4103	4437	5831	4678	4639	5373	5212	3756	9279	4334	6680	5208	5472
CNAG_00104	23732	21717	21232	15694	17818	14655	21772	20543	23498	12643	10922	8468	23626	30466	21249	20702	14532	9929	19148	18007	19152	18476	15104	20760	14713	37737	19010	19964	9963	13434
CNAG_00105	1029	940	1078	829	1290	1033	732	930	1196	731	774	570	1215	1307	1216	1300	760	724	1006	1136	1031	722	919	894	798	1923	925	1062	957	830
CNAG_00106	12479	11512	10792	8261	10509	7890	17468	16369	19926	9484	7489	7278	13648	17772	12981	11466	7573	5555	12298	14865	13604	10430	10441	10073	13678	33367	16575	11834	7911	9383
CNAG_00107	8080	8248	7192	8070	13186	8487	9784	11414	10207	20496	11863	17336	8910	12837	8352	11939	9573	6228	6844	8662	8738	13775	13024	11054	8471	20722	9284	16939	11184	16870
CNAG_00108	6823	6744	6144	4661	7222	4848	5462	5305	7546	3423	2860	2763	7785	8679	7335	6642	4608	4078	6247	6685	6924	3334	3819	4113	5205	12665	6343	3677	3735	3082
CNAG_00109	4617	4918	4248	6259	8855	5710	5269	5332	4911	4590	3112	4870	5326	8512	4865	7461	7753	4703	4033	4745	4689	3783	4449	5280	3543	8848	4182	3963	4043	3397
CNAG_00110	2362	1160	1347	1041	783	888	2618	989	2035	75	56	68	852	1319	945	812	839	1446	1385	1212	912	70	271	127	1136	1809	1112	24	96	35
CNAG_00111	8699	8472	7741	8095	13254	8700	8260	7447	10141	7654	5525	5737	9731	11588	8984	12941	8913	7238	7425	7968	8893	6542	7851	7744	6739	17124	8517	8011	7535	7094
CNAG_07311	1085	1120	831	1261	1635	1133	1360	894	1169	988	652	922	1119	1324	877	1653	1264	1023	936	1084	1000	682	822	961	777	1975	1061	944	853	745
CNAG_07312	3572	3740	3389	4881	8002	5046	4214	3487	5685	5577	4125	4443	4226	5262	4240	6914	5364	4018	3597	4371	3912	4117	4973	4733	3476	8416	4445	5524	4786	4994
CNAG_00115	36040	25303	26688	16086	24832	17199	16458	13913	25022	6686	7176	4782	29244	31962	29287	22036	14248	14497	22656	22324	21238	11595	13336	9079	17345	36771	20131	10720	6013	7733
CNAG_12016	690	628	549	536	976	709	571	447	929	825	1099	555	592	791	621	781	504	648	777	952	521	563	600	449	538	905	557	1383	745	1129
CNAG_00116	55146	49953	49052	13832	21729	16361	31718	23706	53966	7649	7548	4445	56512	53853	51380	21531	12532	12512	46408	46409	48825	9395	10799	11248	35409	76884	44630	10161	9530	8122
CNAG_00117	6728	5988	5546	4994	8371	5513	6098	5608	8528	6818	5478	5630	7630	8417	6695	7266	5206	4839	6259	6640	6570	4188	4836	4868	5271	13188	6635	7391	6335	7001
CNAG_00118	1876	1616	1509	831	1314	910	1920	1760	2640	1000	870	769	2250	2688	1847	1128	803	679	1672	2142	1922	705	743	853	1517	3456	1880	1129	883	899
CNAG_00119	873	995	966	511	644	478	1543	1378	1213	706	393	621	1187	2042	1033	561	518	351	852	1002	961	325	333	454	802	1997	936	516	594	489
CNAG_00120	1969	2171	1999	3599	5456	3602	1851	1949	2545	4010	3185	3688	2299	3101	2348	4366	3681	3059	1841	2532	2014	2508	3044	3041	1717	4000	1930	4048	3806	3695
CNAG_00121	32854	30489	30639	24575	44902	30134	19504	21527	32775	26233	23971	18282	42263	41600	38703	42302	24510	22561	24293	27736	27726	28970	30217	24149	22568	54929	27834	34751	24059	30097
CNAG_12017	44	28	59	213	319	250	57	55	44	399	301	427	66	79	40	341	258	206	27	32	47	303	322	285	33	86	34	357	290	360
CNAG_00122	3459	1408	1806	4991	5018	4845	2529	1448	1980	2985	2450	2738	1266	1989	1303	5224	4736	5851	1619	1247	1065	2346	2957	3055	1272	2078	1257	2908	3230	2813
CNAG_00123	2013	2471	2303	3767	5754	4007	1924	1969	2385	5854	4071	4814	3092	3623	2876	5384	4016	3320	1586	2144	2056	4430	4909	4040	1510	3894	1836	5552	4109	5137
CNAG_00124	2181	1932	2009	2220	3235	2198	3806	3276	3540	4863	3235	3959	2263	3096	1995	2983	2622	1645	2110	2681	2491	2667	2841	2854	2361	5616	2961	4288	3531	4203
CNAG_00125	907	874	926	1200	2091	1405	1292	1276	1206	1296	840	827	1112	1557	960	1870	1488	1109	913	1001	1017	1233	1325	1092	782	1899	1040	1302	1128	1178
CNAG_00126	5284	4076	3998	5622	8453	5985	1479	2255	2972	1003	884	615	5186	5654	5479	8147	4933	5350	4034	3812	3370	2045	2741	2075	2041	4577	2378	1086	1161	947
CNAG_07313	564	732	548	1300	1983	1471	608	563	899	1275	1188	971	754	878	732	1955	1306	1149	812	960	706	1017	1334	1120	642	1211	529	1545	944	1416
CNAG_00127	2074	2127	1864	2526	4679	2953	3162	2241	3486	3535	2875	3345	2563	3027	2365	3787	2909	2375	2285	3141	2301	2000	2441	2526	2143	5252	2590	4053	3215	3732
CNAG_12018	951	1004	858	1198	2155	1618	1012	805	1590	1004	1137	848	1140	1261	1158	1790	1140	1322	1198	1473	1158	745	987	895	981	2079	1051	1369	1291	1122
CNAG_00128	239	270	217	42	20	29	451	271	285	56	20	12	153	229	200	28	47	62	195	268	226	13	21	30	220	546	292	27	23	18
CNAG_12019	377	408	368	1319	1981	1672	545	472	617	1153	789	1039	474	685	447	1920	1614	1237	377	426	434	683	921	1104	417	901	425	987	1230	725
CNAG_00129	2493	2481	2351	3134	4864	3199	2541	2302	3550	1999	1461	1368	3300	3646	3077	4389	2964	2551	2415	2848	2742	2056	2433	2399	2025	5520	2641	2066	2037	1999
CNAG_12020	30	52	59	26	42	25	152	107	87	176	134	191	63	108	42	38	35	24	59	77	34	74	63	72	75	173	60	140	79	130
CNAG_00130	40308	43082	39265	38795	61736	41572	42482	49134	46272	88992	58688	70560	55810	69550	47162	59675	43154	29251	30753	35630	39179	73172	68522	64519	34823	93554	42095	85567	55302	80962
CNAG_00131	681	896	791	3344	5858	4101	646	606	1147	1790	1676	1267	967	969	881	4503	3210	3284	936	1137	829	1393	1838	2316	726	1914	908	2092	2445	1940
CNAG_00132	1486	1306	1346	1651	2917	1931	2420	2482	2219	4446	2628	3874	1799	2653	1697	2875	2195	1477	1490	1816	1669	1943	2202	2403	1414	3659	1784	3790	3377	3710
CNAG_00133	1639	1711	1524	500	892	566	1847	1704	2704	1307	1151	1145	2137	2711	2081	610	434	446	1703	2426	2024	692	711	589	1860	4080	2088	1563	1008	1254
CNAG_00134	2539	2567	2696	2785	4512	3091	2781	2896	3449	4536	3230	3660	3337	3858	2951	4498	2970	2190	2433	2543	2710	3163	3532	2939	2511	6142	2961	4382	3428	4255
CNAG_00135	1685	2027	1551	1155	2156	1456	1904	1563	2443	963	918	920	2169	2910	2025	1607	1271	1148	1777	2899	1983	867	1050	1125	1572	3342	1725	1113	1114	859
CNAG_00136	32576	28714	29427	21311	39048	26683	26654	27772	40288	22524	17684	16526	38593	39474	34432	37086	23626	20342	30235	30786	33931	22412	25443	22669	27639	69736	35776	23924	23596	23744
CNAG_00137	11324	12090	11005	4777	5745	4662	13807	15749	18898	6203	5044	4889	15746	20182	14102	5761	4358	3313	12509	15404	14787	6134	6116	5719	11720	30193	14600	7695	4082	6439
CNAG_00138	6879	6154	6118	5119	8747	6688	4999	4558	8331	5551	5299	3484	7887	8172	7404	8182	5145	4780	5965	7122	6620	5116	5533	5019	5544	12723	6553	7431	4720	6563
CNAG_00139	31861	37701	34971	41477	79989	50658	23385	30464	39084	152532	123597	111599	50799	56555	44002	68608	43784	37373	26382	34040	34394	99513	100016	71582	27224	69361	33843	167844	98959	157899
CNAG_00140	9685	9998	8880	8751	11870	8862	8363	8192	10055	8211	5823	7257	10722	13404	9813	11841	10004	7474	7612	8777	8890	6151	7175	8616	7240	17561	8225	7924	7711	7453
CNAG_12021	0	0	0	0	0	0	0	0	0	0	0	0	0	0	0	0	0	0	0	0	0	0	0	0	0	0	0	0	0	0
CNAG_00141	5752	6187	5389	11935	18435	12605	1898	2805	2917	2524	1876	2271	7848	10039	7361	18072	12894	9938	3468	4107	3723	6383	8241	7452	1870	4735	2237	2675	2723	2412
CNAG_12022	141	169	113	174	303	167	327	232	341	124	124	62	117	219	118	246	172	157	356	276	181	101	147	87	138	346	163	122	114	99
CNAG_00142	2292	2287	2168	2128	2260	1986	2648	2059	2733	1913	1690	1418	2335	3186	2224	2632	1843	1453	2190	2280	2229	2285	1960	2968	1758	4348	2063	2938	1434	1828
CNAG_12023	39	20	33	150	214	183	44	35	55	158	118	117	33	42	24	188	147	125	28	30	37	103	137	109	23	53	26	140	176	132
CNAG_12024	1405	1537	1361	634	895	644	1458	1315	1488	409	237	286	1452	1824	1192	936	653	498	1381	1230	1412	388	413	525	1004	2689	1268	344	361	335
CNAG_00143	8971	8401	8163	3394	5503	3802	8204	7113	8981	2377	1702	1927	9544	11532	8620	5465	3658	2970	7944	7495	8586	2392	2976	3048	6287	15917	8028	2670	2513	2180
CNAG_00144	1383	1226	1092	1376	2665	1586	1428	1797	1918	1599	1411	1547	1483	1898	1468	2052	1489	1330	1380	1733	1516	1361	1451	1849	1046	2814	1575	1779	2059	1494
CNAG_00145	3724	3990	3458	1117	1851	1277	4316	3352	5614	926	777	722	4357	5456	4254	1409	1005	987	3917	5523	4516	398	597	872	3529	8286	4271	876	1197	802
CNAG_00146	6426	6203	5790	6407	9290	6624	5701	6002	6654	5319	3789	4614	7979	10096	7404	8997	6844	4949	5103	5892	6292	4515	5267	5710	4937	11834	5741	4920	5314	4338
CNAG_00147	82888	70201	74431	59675	99038	73064	63440	71131	98110	56602	47627	41474	95239	95800	83574	98957	62786	55995	72018	72125	80273	52799	63675	61622	65649	168706	84723	68302	65146	65741
CNAG_00148	28132	25244	25300	16669	30064	19580	24234	28760	30028	31887	22432	24156	34289	38919	29071	29183	18919	13744	23572	24937	27179	21722	22667	20881	21401	57752	27959	30555	26962	31665
CNAG_00149	6372	5777	5491	6511	9672	6754	6013	4397	7815	10115	8346	8783	6030	7328	5990	8223	6216	5892	6116	6903	5460	6046	6847	5976	4846	9874	5663	11230	8163	9757
CNAG_00150	25766	22821	22364	14099	16939	14053	28207	25690	27963	15225	10229	12428	27425	35801	24641	17699	14267	13460	23326	24806	24816	8717	10804	11869	18701	44425	22029	15157	14852	13981
CNAG_00151	6062	6006	5258	3982	6642	4314	6308	5747	6811	4606	2997	3904	6318	7878	6028	5837	4599	3471	5230	5845	5733	3203	3692	3917	4589	11386	5082	4458	4088	3895
CNAG_00152	2839	2989	2522	2637	3652	2556	3074	2889	3206	2610	1753	2428	3339	4514	3007	3514	2937	1814	2310	2900	2759	1921	2190	2454	2156	5600	2733	2513	2227	2169
CNAG_00153	1594	1595	1588	998	1608	1156	1659	1810	1717	1530	997	1226	1971	2747	1946	1416	1269	787	1316	1705	1549	874	895	1188	1335	3433	1583	1286	1335	1311
CNAG_00154	6539	6211	5990	2437	4670	2910	5056	5546	8500	3692	3246	2671	8853	8352	7154	4371	2603	2152	5620	6399	7031	3457	3441	2852	6037	14262	7358	4601	3265	4100
CNAG_12025	176	235	226	313	519	372	185	193	302	830	602	632	279	319	305	457	327	261	147	247	225	329	373	446	164	375	190	825	678	785
CNAG_00155	0	0	0	0	0	0	0	0	0	0	0	0	0	0	0	0	0	0	0	0	0	0	0	0	0	0	0	0	0	0
CNAG_00156	12863	11224	11224	17296	25294	18009	13433	12271	15171	14413	12323	10841	13860	16604	12869	24537	18756	14537	10679	12139	11441	13640	16506	14078	10270	23911	11879	17555	11334	13553
CNAG_00157	5056	5105	4639	6467	11929	7871	5283	6418	6184	4814	4063	3716	5378	8028	5706	9318	7006	5823	5591	6356	5040	4140	5093	4787	4039	8781	4481	4863	3927	3679
CNAG_00158	785	783	662	634	1114	702	1491	1014	1253	636	445	628	774	1029	711	923	719	557	569	876	884	529	639	653	783	1999	879	628	617	544
CNAG_00159	1220	1145	1155	1190	1971	1276	1724	1426	2297	1655	1327	1393	1575	2261	1551	1788	1029	1111	1459	1968	1400	983	1261	1216	1443	2876	1606	1729	1666	1391
CNAG_00160	793	842	773	1435	2148	1539	1115	1190	1262	2660	1712	2442	1065	1452	982	1998	1537	1124	756	976	901	1188	1458	1704	800	1972	1032	2488	2316	2065
CNAG_00161	1974	2147	1658	3750	8001	4947	2208	1708	2812	4679	4410	3988	2143	2900	1859	5808	4626	4008	2480	2968	2324	3661	4278	4557	2118	4695	2156	5576	4974	4588
CNAG_00162	153532	147197	137761	214338	395998	239915	127264	116759	215421	129790	129068	92384	160729	182954	155804	350776	218707	189405	145377	149605	146559	267788	279013	147703	141995	341798	173880	195231	97396	176674
CNAG_00163	6390	5909	5649	8555	15355	11106	6983	6842	9781	12991	11323	11183	7288	8692	6623	13166	9308	8515	6257	7471	6679	6870	8588	9342	5930	14660	7144	15026	12640	13355
CNAG_12026	169	133	135	81	125	72	217	214	240	82	89	146	138	246	170	125	55	46	140	197	174	58	62	47	147	409	191	92	81	91
CNAG_00164	2600	3015	2485	36755	64212	45869	2158	1006	2715	25239	20764	20611	3687	4453	3313	57681	42139	36468	1674	2448	2064	26359	37758	32431	1846	4643	2390	24796	27613	23125
CNAG_00165	8293	7859	7147	4394	4867	4059	8954	7143	8786	1418	1015	951	8091	10844	7707	5380	4317	3306	6809	7292	7630	2384	2875	2678	5265	13725	7035	1699	1342	1282
CNAG_12027	17	48	16	37	41	34	45	30	41	37	17	37	23	57	21	43	51	30	27	35	24	26	23	42	28	53	20	27	28	21
CNAG_12028	50	25	39	64	114	70	31	45	44	57	42	73	58	49	45	81	85	59	37	53	37	41	57	53	31	63	38	40	63	49
CNAG_00166	1606	1644	1402	2819	2927	2557	2095	1491	1962	2289	1899	1738	1566	2217	1447	3464	2498	1754	1786	1405	1466	3562	3123	3637	1142	2818	1395	3305	1373	2262
CNAG_00167	3473	3471	3468	4921	7992	5404	3194	3233	4393	6222	4704	4772	4463	5231	4206	7339	5414	4136	3379	3697	3699	5095	5403	4483	2966	7787	3811	6664	5104	6365
CNAG_07314	9303	7275	7542	12516	18900	14223	3677	4132	3686	14877	10295	11158	11430	15931	10404	20393	15687	9471	3677	4484	4129	9895	11126	11315	2644	5958	3088	12614	10101	12340
CNAG_07315	5021	4919	4786	4310	7386	5193	5507	4844	7345	4662	3680	3954	6145	6820	5773	6623	4498	4038	4741	5589	5542	3765	4042	3630	4695	11366	5599	5097	4293	4758
CNAG_00171	2742	2753	2511	4643	7482	4890	2581	2309	3466	4789	3611	4436	3409	4328	3234	6365	4663	3713	2461	3142	2727	3172	3711	4247	2135	5490	2869	5075	4955	4450
CNAG_00172	1957	880	1102	1113	1293	961	2185	938	1687	505	416	487	647	1142	821	1215	1050	1169	1005	937	791	475	559	469	847	1782	1031	636	471	564
CNAG_12029	6	11	10	17	17	23	4	4	23	36	27	16	13	5	10	25	18	13	16	9	15	10	43	15	14	46	9	35	33	28
CNAG_00173	2698	2672	2368	2564	4403	2928	1912	2326	4182	2587	2601	1749	3387	3513	3448	3709	2479	2320	2299	4036	3082	1843	2239	2387	2686	6180	3156	3228	3173	3015
CNAG_00174	9457	8907	8773	6369	9787	6422	8500	9392	9436	11632	8167	9806	11957	14554	10376	9559	7038	5085	7639	8260	9090	8064	8042	8087	6883	18136	8776	11158	9456	11398
CNAG_00175	5527	4977	4911	2910	4540	2982	6118	6481	5322	6469	4027	5818	6457	10175	6033	4327	3315	2279	4365	4541	5036	3235	3353	3671	3991	9871	4678	4922	3913	5487
CNAG_00176	12179	11424	11110	10311	19485	13858	9030	10066	15143	8502	6811	5488	14902	14306	13843	18284	11198	10277	11150	12748	13094	7521	9292	11151	10239	25590	13169	9021	11837	8298
CNAG_00177	1865	1478	1347	1565	1973	1737	2138	1821	2823	863	633	789	1749	2278	1677	1783	1426	1497	1296	1890	1352	451	746	1014	1431	3079	1647	689	1161	592
CNAG_00178	7721	7429	7205	7940	11930	8363	8606	8885	9570	11071	7405	9507	9122	11856	8693	11980	9110	6652	6227	7254	7932	6778	7139	8555	6852	16753	7955	10255	9804	9852
CNAG_12030	93	70	100	77	82	91	372	214	206	70	36	94	106	190	101	27	84	85	127	190	108	20	30	43	97	240	108	61	88	31
CNAG_00179	309	359	254	667	685	649	606	495	505	613	430	582	313	442	239	820	622	466	326	444	384	348	577	697	345	733	337	608	603	532
CNAG_12031	8	5	11	16	9	9	9	4	4	13	12	17	10	8	7	13	6	1	7	8	9	7	16	7	4	12	6	17	7	14
CNAG_00180	4748	5444	4389	2296	4462	2791	3908	4103	5822	6656	6357	5545	6188	6976	5712	3751	2471	2114	4344	5574	5296	4408	4419	3818	3962	10104	5039	7605	5358	7230
CNAG_00181	4532	5244	4267	8477	15087	9430	5686	6056	7342	10286	8108	9312	6910	9069	6277	12195	8832	7764	4824	6660	5215	7485	9208	7960	4848	11854	5504	10327	8555	9527
CNAG_00182	5226	5886	5025	4297	7916	5236	5110	5268	8449	3803	3924	3123	7175	8464	6916	5981	4312	4042	6067	8306	6220	3185	4006	3688	5153	12300	5876	4953	3967	4238
CNAG_12032	100	113	97	642	995	899	192	103	221	209	200	116	124	151	113	898	634	880	185	196	127	306	424	316	133	270	103	234	189	150
CNAG_00183	3105	3792	2837	25887	30422	24314	4470	5092	5037	19194	14181	16203	3958	5765	3543	32348	24667	18946	3970	3038	3124	23220	30279	13295	2886	7921	4080	21398	10812	20268
CNAG_12033	46	85	34	71	110	100	49	97	146	113	227	205	40	84	25	105	47	87	180	72	76	104	102	83	71	113	57	280	112	210
CNAG_12034	204	237	232	365	579	469	379	269	325	287	215	339	224	437	221	468	443	307	223	341	212	167	199	317	181	417	151	342	219	277
CNAG_00184	10251	10325	9697	9571	15234	10886	8862	10168	11436	9940	7590	8188	12183	14839	11439	14833	11051	8858	9351	9820	9398	7712	8799	8920	7855	18245	8859	10136	9018	8944
CNAG_00185	7066	6837	6443	5270	8845	5574	6128	6581	9323	6580	5894	5191	9168	9963	8469	7707	5395	4489	6454	8109	7208	6076	6362	5542	6191	15116	7559	8460	6199	7104
CNAG_00186	642	840	638	1799	3795	2364	617	581	1242	1310	2138	1330	830	870	792	2819	1590	2191	823	1123	866	1483	1641	1194	747	1502	820	2199	1624	1842
CNAG_00187	4775	5097	4373	5759	8744	6340	5143	4903	6367	8589	6761	6941	6118	7382	5729	8181	6111	4464	4048	5380	4858	6719	6920	6071	4302	10858	5462	9210	6449	8348
CNAG_00188	2602	2724	2273	2151	3720	2337	2712	2388	3309	1458	1400	1448	3182	3878	2889	3040	2359	2031	2479	3077	2815	1311	1904	1762	2219	5317	2625	1607	1834	1379
CNAG_00189	3384	3279	3038	2971	5318	3560	2879	2983	4951	3202	2985	2431	4411	4881	4023	4515	2945	2839	3459	4491	3817	2296	2837	3176	3096	7609	3916	3641	3841	3175
CNAG_00190	11630	11426	11177	19740	34071	22939	11171	13548	14441	18649	13973	15320	15178	18463	14175	30870	21862	16760	10398	11530	12294	18300	20671	17849	9888	24907	12429	20050	16538	17841
CNAG_00191	1220	1137	984	781	919	774	1376	1185	1661	539	526	407	1141	1478	1145	824	719	657	1279	1479	1201	422	485	562	1061	2384	1235	859	787	645
CNAG_12035	14	24	12	46	76	42	12	42	46	37	23	9	21	42	7	57	44	32	34	45	28	12	6	19	29	40	33	37	17	28
CNAG_00192	2087	2030	2146	6672	9037	6945	1886	2963	2197	2339	1581	2062	2703	3624	2589	9949	7564	5160	1898	2161	2357	2022	2533	3528	1450	4183	2013	2275	2183	2383
CNAG_00193	22886	19658	20216	24074	39100	27348	18072	19837	21081	22590	16925	18559	25283	29148	22488	38118	26498	20979	17104	18535	19335	18857	22638	24373	14729	36602	18420	24340	23118	23222
CNAG_00194	3406	2445	2234	9347	14286	10645	1448	1546	2651	5840	5421	3453	2707	2719	2511	15317	9087	8089	2634	2220	2214	7617	8971	7491	1859	4156	2219	8027	6357	6901
CNAG_00195	2915	3542	2669	3389	5524	4082	3614	3640	5640	3499	3299	2783	3870	5610	3957	4697	3621	3224	3796	5671	3946	3197	3835	3735	3565	7468	3713	4029	3335	3057
CNAG_12036	6	8	3	9	18	23	4	8	5	6	8	1	9	11	10	13	25	18	8	4	5	8	12	9	6	14	5	10	5	14
CNAG_12037	71	111	87	414	551	330	84	53	124	235	247	250	118	130	69	471	382	397	78	105	62	330	368	231	63	123	36	306	142	238
CNAG_07316	4919	4399	4364	61408	97838	59599	4321	5613	6263	43584	34104	36396	5256	6708	5187	83257	59793	46534	3700	4009	3942	42859	46418	44524	3705	9254	4821	47343	38566	43283
CNAG_07317	5054	4935	4449	8099	12225	7820	4497	4715	5789	12293	9537	9811	5956	7036	5678	11358	8105	6219	4212	4757	4527	10558	9722	7865	3961	9736	4636	12985	8775	11730
CNAG_07318	12559	11370	10829	6774	12329	8206	11766	11301	14828	7909	6090	6389	14587	16871	12531	11451	7678	6513	10837	11682	12317	6476	7359	7113	9562	24626	12600	8251	7802	7977
CNAG_07319	7896	9485	8569	6138	11816	6848	9153	10353	10900	29629	20175	23107	11476	15438	9892	10253	7097	4694	7303	7909	7985	18943	17667	13695	7978	20833	9270	27996	16237	24943
CNAG_07320	5924	5277	5092	6043	9295	6317	5469	5796	6458	8464	5837	6249	6360	7905	6401	9113	6332	5012	4803	5105	5549	5473	5905	6070	4494	10875	5551	8800	6212	7765
CNAG_07321	1315	1259	1247	740	1059	652	1483	1431	1952	872	647	661	1509	1847	1365	1030	610	561	1269	1534	1502	422	621	749	1232	3567	1689	952	1049	837
CNAG_07322	9409	9198	8331	5371	8288	5847	11218	9351	10764	4971	3658	4587	10235	14190	9621	8052	6215	4492	8608	8834	9112	3653	4390	4886	7453	18042	9106	5118	4523	4521
CNAG_07323	7777	7097	6887	6060	9625	6501	7567	7542	8673	6459	4745	5830	8481	10994	7512	8743	6777	5183	6572	7501	7652	4789	5771	5993	5826	14424	6996	6533	5998	5829
CNAG_07324	3929	3567	3409	2330	3427	2645	2619	2786	4247	2331	2213	1794	4567	4317	4167	3182	2116	1954	3534	4138	4039	2056	2255	2233	2999	6766	3364	3245	2465	2640
CNAG_07325	3326	4622	3237	3334	5017	3444	4145	3915	4262	4935	3663	4657	4465	6942	4346	4056	3590	2859	3270	5110	3784	2760	3071	3341	2946	7091	3178	4638	3616	3867
CNAG_07326	9700	10017	8881	6015	9720	7182	7422	6853	12158	3320	3570	2700	10563	12955	10669	7475	5369	6130	10026	12884	9824	3285	4150	4457	7829	16585	9184	4396	4295	3484
CNAG_07327	712	727	631	818	1119	884	1152	893	1022	991	538	763	727	1329	683	1121	968	594	650	811	680	700	746	782	670	1662	752	855	685	709
CNAG_07328	2910	2388	2847	2262	4620	2592	2374	2951	3445	3330	2688	2412	3403	3694	2980	3810	2737	2166	2377	2688	3004	2455	2700	2465	2631	6714	3237	3312	3187	3333
CNAG_07329	11432	10659	9805	9879	12642	8839	14711	14817	13319	14747	9786	12082	12625	17765	11341	13132	10630	6737	10221	10675	11088	9955	10103	8891	8892	23804	11314	15281	9777	14017
CNAG_07330	466	448	315	229	273	263	544	400	572	190	107	196	455	668	470	259	282	165	386	475	452	115	155	176	364	893	409	187	183	172
CNAG_07331	248	278	204	334	412	294	361	265	326	324	219	282	306	464	292	391	306	254	256	314	254	191	220	276	202	401	191	311	240	232
CNAG_07332	2094	2108	1863	1874	3614	2440	2108	1987	2791	1855	1399	1322	2538	3040	2273	3054	2174	1952	2031	2306	2199	1352	1885	1847	1937	4898	2270	1943	1893	1707
CNAG_07333	21665	18970	19566	10392	16017	11457	17951	20306	23233	11287	8127	8196	26516	31386	24052	15739	11171	8457	16880	20079	21237	8974	9970	10287	16634	42891	20341	11105	10914	10753
CNAG_07334	20318	16814	18118	11149	21285	11462	14350	23462	19771	8693	6724	6795	28068	31331	28379	18381	12530	9070	15301	19162	20348	11540	11505	7842	17345	42245	20184	9904	6014	9282
CNAG_07335	2802	2650	2724	1873	2942	1695	2484	2926	4136	1367	1269	839	3498	4177	3491	2910	1850	1324	2981	3365	2865	1797	1686	1030	2348	5654	2979	2154	917	1610
CNAG_07336	259	250	221	154	262	159	241	181	315	165	131	121	274	278	266	221	153	154	246	251	270	127	144	109	170	473	218	143	166	186
CNAG_07337	6195	5229	5032	4639	8158	5525	5059	5351	8003	4762	3907	3522	6830	6942	6346	7306	4830	4622	5382	5947	6020	3835	4570	4518	5010	12675	6053	5424	5845	5075
CNAG_07030	2488	2290	2212	2661	4179	2865	2623	1991	2457	2484	1488	1848	2582	3775	2400	3973	3193	2229	1826	2312	1929	1570	1892	2342	1515	3767	1777	2058	2029	1978
CNAG_07029	6764	6200	6227	6954	12210	7894	5332	6321	6861	7565	6019	6045	7644	10454	7961	10791	7697	5870	5050	5901	5905	6895	6424	6083	4828	11604	5942	8062	6597	7174
CNAG_07028	8270	9860	7573	4972	9073	6193	8164	7447	12463	4672	4472	3806	10430	13182	10164	6820	5082	4712	9334	13844	9812	4135	4998	4906	8221	18454	9538	5298	4661	4794
CNAG_10000	0	0	0	0	0	0	0	0	0	0	0	0	0	0	0	0	0	0	0	0	0	0	0	0	0	0	0	0	0	0
CNAG_07027	4984	4572	4436	4784	7184	4959	3502	3722	5073	4186	3110	3366	6239	6663	5555	6480	4858	3941	3685	4207	4327	3579	4023	3324	3531	8471	4340	4506	3419	4065
CNAG_07338	2343	2456	2389	2829	5318	3039	2464	2701	3376	6281	5177	4778	3220	3777	2842	4464	2942	2278	2278	2472	2789	5359	5163	3727	2224	5521	2642	6904	4610	6430
CNAG_07339	3765	3487	3397	4344	7914	5207	3123	3432	4633	6471	5409	5061	4462	4988	4041	6695	4449	3820	3157	3652	3586	4692	5170	4543	3144	7525	3808	7613	5638	6652
CNAG_07340	2417	2415	2264	3593	5694	3997	3255	3036	4469	3722	3278	2926	2983	4234	3063	4619	3760	3350	2895	3971	3009	2535	2973	3468	2900	5754	3289	3869	3653	3314
CNAG_07341	3241	2495	2865	11773	21595	14843	2308	1809	4706	5722	7299	4314	3078	2735	3483	18280	10683	12106	3194	3460	2781	7271	8616	7970	2804	5847	3345	9353	9339	8141
CNAG_07342	4715	4766	4186	3690	5589	3941	4327	3935	6135	2937	2672	2354	5429	6244	5108	4622	3509	3095	4805	5431	4909	2978	3352	2893	4040	9020	4720	3607	3032	2888
CNAG_10001	0	0	0	2	0	0	0	0	0	0	0	0	0	0	0	0	0	0	1	0	0	0	0	0	0	0	0	0	0	0
CNAG_10002	0	0	0	0	2	0	0	0	0	1	0	2	0	0	0	0	1	0	0	1	0	0	2	0	0	0	2	0	0	0
CNAG_00229	1067	1221	1040	1543	2198	1758	976	1114	1266	2340	1798	1639	1567	1940	1354	2040	1727	1192	1015	1054	1039	1392	1496	1737	832	2150	1098	2108	1873	2090
CNAG_07948	757	1131	861	642	1250	839	1198	1019	1513	1245	1166	1086	1267	1619	1092	898	691	673	987	1686	1022	698	952	857	958	2008	1028	1588	1136	1136
CNAG_00231	2224	2239	2242	1800	2465	1765	2540	2376	3267	2451	1895	1816	2791	3367	2550	2419	1843	1415	2206	2735	2618	1658	1651	2035	2025	5363	2574	2463	2071	2088
CNAG_00232	33461	34645	30274	11823	18520	14326	26100	18561	39216	7656	7597	5181	33716	40413	32321	16791	10759	10972	34280	39963	33680	8050	9954	9784	25713	57004	29568	9191	7812	7375
CNAG_00233	2620	2885	2556	3233	5521	3884	2476	1859	4249	2211	2872	1853	3381	3616	3277	4322	3071	3071	3393	4200	3266	2199	2681	2462	2662	5726	3293	3184	2632	2401
CNAG_00234	1743	1594	1461	1537	2300	1684	1885	1584	1935	1366	1176	1047	1894	2378	1874	2380	1693	1151	1617	1699	1849	1297	1454	1524	1394	3748	1766	1597	1411	1451
CNAG_00235	11654	11514	10236	12330	10658	10683	8764	8508	12597	6086	9339	3690	13439	14755	12260	14198	8744	7797	10491	10819	10642	16184	18305	15656	7837	18852	9912	18279	5871	9433
CNAG_00236	1630	1347	1372	3149	3109	3017	1708	1196	1430	1497	1433	1247	1399	2138	1429	3435	2675	2362	1325	1407	1306	2812	3709	2831	882	2465	1078	2419	1159	1254
CNAG_00237	30542	28488	26920	28275	45104	31866	18508	19786	27610	19357	16478	14331	32282	36065	29833	43831	28190	25331	24876	26417	27284	19744	23495	21297	17848	44779	22733	24129	19868	20510
CNAG_10003	2	0	0	2	5	3	1	0	0	0	5	0	0	0	1	6	7	2	0	4	0	4	2	0	0	0	0	4	0	1
CNAG_00238	44005	38143	37759	16164	25215	18547	31059	27916	44613	10615	9219	7103	45192	46268	39352	24952	15417	14870	36094	36562	40464	12634	14414	13973	29519	72520	38558	13840	11808	11153
CNAG_00239	5220	5480	4692	7553	10104	7048	7362	7742	5579	9227	5341	8654	6333	10258	5622	10545	9121	5296	4368	4619	5228	7844	8196	8077	3902	11137	4983	7949	6378	7110
CNAG_00240	5283	5028	4606	3974	6279	4204	6808	6027	6055	5549	3334	4893	6288	8362	5353	6106	4888	3121	4332	5031	5261	3470	3673	4207	4072	11591	5380	4922	4749	4999
CNAG_10004	1	0	1	0	0	2	0	0	0	4	1	4	0	3	2	0	2	0	0	3	0	0	0	1	0	0	0	1	0	3
CNAG_00241	3838	3959	3431	3538	4141	3126	3653	3176	4819	2785	2286	2102	4394	5080	4119	4136	3158	2462	3526	4310	3937	2575	2747	3117	3190	8109	4096	3260	2426	2704
CNAG_00242	304	260	210	336	296	302	297	212	341	424	259	380	228	375	291	304	292	196	235	285	222	130	194	243	205	472	198	365	326	300
CNAG_00243	1864	1870	1745	1879	2583	1810	2232	2005	2423	2218	1428	2059	2296	3009	2104	2267	2015	1379	1693	2038	2113	1342	1388	1531	1544	3999	1894	1945	1670	1647
CNAG_12038	124	142	88	1355	1821	1224	185	170	230	1140	1057	1117	121	272	121	1689	1443	1298	155	197	104	744	833	647	125	245	106	1165	659	931
CNAG_07344	5811	5014	5151	3727	5772	3923	4862	6326	6486	6491	4782	5023	7468	9430	7174	5699	4259	3146	4604	5842	4992	3038	3758	3912	4089	10155	4685	5715	5532	5535
CNAG_00246	5580	5226	5076	6120	9861	6168	6578	6721	6203	8269	4497	7397	6794	9528	6148	9235	7464	5030	4632	5393	5735	4259	5471	5739	4222	11855	5299	6533	6457	6309
CNAG_00247	582	543	589	16203	32875	19546	364	455	803	9128	9231	6502	698	687	673	26570	15621	16485	646	609	558	13481	16581	12431	508	1220	586	11704	12159	11404
CNAG_00248	2344	2091	2060	2251	3598	2460	2315	2318	2867	2423	1934	2006	2797	3082	2514	3189	2545	1868	1962	2399	2206	1663	1762	1858	1985	4771	2237	2571	2207	2464
CNAG_00249	9164	8215	8043	4728	7216	4874	10616	11400	9933	5146	3190	4762	10433	15719	9360	6625	5547	3899	7786	7890	8400	3568	4155	4139	6506	16329	7845	4125	4150	3891
CNAG_12039	586	497	551	730	1024	926	343	372	403	532	439	469	724	1098	829	1021	786	762	397	410	419	446	463	501	250	607	278	588	383	514
CNAG_00250	1342	991	868	1038	804	715	3537	1822	1555	902	551	1190	733	1476	712	904	1108	939	960	1010	878	406	495	493	925	2012	1122	706	601	724
CNAG_00251	81	69	76	593	1097	837	129	79	151	353	252	297	53	132	101	855	703	583	104	148	67	269	378	466	76	281	107	316	353	269
CNAG_00252	1340	1154	1215	1082	1958	1307	1016	994	1589	962	1028	822	1552	1808	1664	1612	1223	1050	1210	1385	1203	957	1020	925	984	2466	1280	1246	1161	999
CNAG_00253	3994	3756	3627	3205	6214	4065	3379	3521	5372	4565	3961	3306	5138	5305	4496	5502	3460	3021	3121	4463	4124	4035	4288	3359	3467	8863	4381	5490	4504	5065
CNAG_12040	149	145	139	120	216	144	185	124	171	224	185	248	177	313	160	193	149	131	132	183	166	178	199	143	94	238	110	278	168	208
CNAG_00254	2553	2802	2528	2982	6100	3564	1341	1557	2850	8480	8513	6202	3235	3244	3110	5236	3057	2686	2430	2999	2732	7655	7278	4865	2190	4941	2571	11277	6753	10570
CNAG_00255	3438	3261	2851	2879	3742	2876	3478	3062	3875	2241	1721	1864	3379	4779	3338	3623	2809	2199	3282	3073	3079	1472	1786	2136	2450	6218	3079	2125	2122	1904
CNAG_00256	12073	10199	9899	4664	6707	5161	10281	8841	11604	4134	2802	2949	10933	14101	10215	6813	4937	4248	10282	9380	10091	3579	4098	3921	8048	19648	10287	4202	3390	3797
CNAG_00257	15935	14180	14436	11793	18932	12540	16811	17186	19431	10296	7173	7870	17784	21527	16352	18176	13179	9846	13485	15632	15698	8340	9175	9603	13185	33329	16431	10372	8803	9811
CNAG_00258	3343	2905	2735	2271	3563	2680	5000	3484	5007	2789	1965	2324	3278	4192	3043	3350	2691	2141	3130	3525	3411	1637	1998	2382	2969	7784	3961	2774	2974	2545
CNAG_00259	3392	3538	2960	3104	3051	3066	3302	2403	4089	1603	1869	1050	3322	4404	3071	3213	2701	1967	3489	3860	3224	2849	2523	3238	2698	6206	3097	2634	1523	1704
CNAG_00260	7721	7798	6846	5690	8291	6375	7609	5779	9286	7706	6135	5828	8273	9722	7768	8552	5715	4693	7420	7623	7816	5125	5851	5249	6276	14980	7703	8919	6245	8163
CNAG_00261	196867	195493	181811	63407	56600	55510	183287	187160	184086	74187	47286	78004	228326	359132	212240	56930	55783	51559	138748	145474	145622	20861	25968	29095	104880	270520	131808	46474	53889	43284
CNAG_00262	43	93	45	549	497	376	146	131	141	157	104	122	86	148	112	551	747	446	98	110	57	169	193	168	61	182	69	94	87	100
CNAG_00263	3830	4222	3801	5093	7545	5191	4234	4170	4696	5922	4546	4682	4554	6359	4657	6693	5757	4241	3466	4466	3647	4210	4689	4562	3123	7334	3674	5737	4752	5067
CNAG_00264	15695	18026	15256	23276	39137	26304	10802	14619	16837	17946	16144	14435	22595	28002	21610	33953	25616	20517	13828	18275	15776	19973	23785	17570	11685	28740	13554	21309	14158	18395
CNAG_00265	2462	2777	2359	2893	3997	3154	1880	1645	3235	1342	1473	764	2706	3142	2651	3788	2787	2421	2695	3442	2686	2043	2247	2510	1979	5043	2310	2034	1482	1624
CNAG_00266	2465	3213	2581	1792	3058	2020	3042	2916	3490	2442	1913	2230	3263	4552	3271	2737	1926	1477	2527	3319	3154	1910	1968	2057	2416	5992	2786	2680	1961	2333
CNAG_00267	2511	2620	2525	2221	3759	2654	3067	3227	3235	4208	2501	3024	3123	4407	2873	3396	2688	1714	2335	2714	2718	2328	2263	2480	2162	6020	2815	3775	3065	3410
CNAG_00268	17407	17839	16392	8420	10607	8961	16762	13257	20092	6039	4884	4203	18440	21045	16194	11566	7705	6367	17234	16823	17958	7356	7887	7775	12939	32760	16773	7917	5408	5951
CNAG_00269	226	203	276	6697	13300	7073	299	1111	1022	9565	9269	7346	263	333	363	11763	7309	6116	323	357	242	9043	9885	8264	556	1263	757	12434	13363	11085
CNAG_12041	106	85	96	310	534	351	47	63	77	384	293	333	96	163	117	445	349	249	89	104	68	428	445	210	62	136	66	421	248	359
CNAG_00270	6574	7099	5985	3996	7166	4911	4340	4322	9654	2879	3294	2174	8136	8380	8253	5480	3392	3853	7386	10206	7211	2764	3434	3261	6222	12224	6739	4345	3576	3348
CNAG_00271	3261	3518	2868	1785	2741	2002	4307	3786	4396	2574	1619	2310	3803	5747	3765	2658	2274	1497	2859	3759	3318	1514	1653	2022	2777	6840	3232	2061	1796	2036
CNAG_00272	10968	10168	9363	8163	14372	9767	10771	11220	13934	10648	7761	8228	13134	14665	11502	12922	8556	7520	9722	10153	10974	6955	8360	9205	9077	23448	11969	10634	10911	10037
CNAG_00273	900	853	772	1433	2232	1474	1030	774	1106	1212	874	1054	912	1405	1018	1843	1577	1250	734	874	842	839	986	963	711	1626	722	1147	1036	970
CNAG_00274	3799	3525	3169	3634	5662	3654	4001	3906	3785	2909	2019	2642	4203	5374	4046	4706	4036	2815	2808	3252	3122	2660	2819	2712	2727	6402	3119	2952	2843	2613
CNAG_00275	3082	3247	2864	5775	10397	7309	1102	1497	2759	2416	3013	1741	4042	3440	3841	8766	5051	5665	2664	3010	2940	4798	5844	3624	2014	4159	2260	3466	2821	2994
CNAG_00276	1118	1217	1207	3876	6646	4630	1067	1433	1720	3686	3189	2937	1549	1885	1384	5441	3964	3469	1306	1662	1321	2863	3793	4060	1244	2633	1443	3477	3838	3053
CNAG_00277	3650	3934	3247	2766	4928	3335	4100	3753	6480	3584	3400	2685	4568	5805	4200	3848	2727	2863	3886	6188	4072	1962	2628	2827	3640	8343	3991	4210	4057	3487
CNAG_00278	3444	3620	3076	3276	5391	3556	3476	3362	4772	3668	2793	2862	4178	5351	3997	4568	3288	2716	3450	4468	4033	2552	2858	3184	3103	7532	3717	3745	3532	3459
CNAG_00279	12658	15901	11842	9206	14837	9447	15320	12870	19576	14645	12743	12463	16029	22628	15918	11935	9562	8008	14440	20638	15797	8143	8847	9471	12847	30005	13631	16827	11779	14182
CNAG_00280	11655	11355	10495	6858	12346	8405	9749	9415	14384	6557	6017	5200	12533	14691	12403	10565	6629	6845	11865	11866	11160	5486	6391	6243	9062	20678	11259	7888	7571	6592
CNAG_07345	1559	1535	1479	1730	2902	1847	2013	1976	1644	2779	1549	2455	1841	2565	1573	2508	2299	1523	1275	1619	1891	1451	1744	1853	1258	3204	1457	2152	1998	1959
CNAG_07114	4226	4305	3903	3675	6809	4609	2847	2766	5951	3373	4036	2324	5152	5084	4902	5554	3391	3612	4490	5400	4585	3128	3645	3274	3984	8526	4710	5234	4410	4589
CNAG_07346	18791	18061	16601	8803	14657	10312	15077	13498	21123	7333	6336	5147	20457	22008	18803	13337	8871	8152	16722	18144	18642	6984	7970	7744	14281	34633	18145	8325	7863	7397
CNAG_00283	4051	4216	4000	8637	14102	9984	3854	4645	5900	16315	11868	11883	5572	6331	4815	13176	9074	7232	3985	4394	4682	8489	9306	10623	3972	9326	4755	16857	14268	15899
CNAG_00284	2377	2269	2158	5743	9496	6675	1907	2300	3265	6594	5727	5164	3240	3971	3111	8284	6235	4915	2293	2922	2666	4101	5007	5525	1932	4869	2547	6811	6750	6051
CNAG_00285	7158	6332	6321	2974	5008	3086	7377	7850	10499	16124	12767	11707	9081	9403	7532	4294	2753	2177	6299	7070	7693	9356	7807	5607	6852	17354	8597	17787	12832	16751
CNAG_00286	7874	7448	6794	7129	9947	7386	7463	6467	9935	6068	5449	4901	8773	10045	8076	9855	6490	6021	7239	8359	7618	6158	6768	6213	6564	15324	8003	7989	5749	6303
CNAG_00287	15653	16666	14043	8482	15710	10422	15053	11595	19003	7760	6488	6558	18241	22810	17616	13071	9438	8893	15507	20338	16950	7011	8292	7429	12541	30616	15108	8401	7046	7312
CNAG_00288	5555	5998	4704	5504	9736	6425	6217	5062	8894	5408	5260	4262	6370	8197	6027	7607	5660	5468	6023	9113	6496	3338	4527	4880	5577	12388	5723	5748	5540	4966
CNAG_00289	3051	3240	2907	1717	2720	1738	2880	3456	4399	1945	1596	1652	3539	4643	3604	2392	1723	1398	3140	3591	3474	1450	1699	1599	2736	6585	3375	2201	1888	1981
CNAG_00290	7387	6711	6323	6181	10053	6828	6154	6134	9416	5658	4667	4105	8951	9592	8312	9235	6637	5328	6379	7008	7079	4816	5581	5813	5835	15212	7518	6597	6318	5491
CNAG_12042	62	51	44	70	126	119	53	77	54	67	59	37	73	110	63	131	78	64	38	52	36	44	79	54	40	100	31	83	38	46
CNAG_00291	3534	3275	2913	4162	5984	4165	3569	3281	4139	3890	2991	3170	4204	4980	3719	5682	4123	3259	2997	3592	3290	3402	3729	4123	2803	6803	3384	4428	3906	3763
CNAG_00292	10629	11507	9315	11034	12926	10918	9613	7174	13760	5823	6837	4024	10988	13424	10657	13681	9456	7796	13007	12870	11276	10238	10920	10657	7960	18884	9562	11242	5259	7754
CNAG_00293	9307	9725	8330	7398	11557	7604	10283	9854	11766	6426	4852	4929	11409	14606	10446	10921	8284	6004	8746	10893	9869	4800	5823	6780	7359	19880	9367	6366	6272	5209
CNAG_00294	6922	6734	6148	5288	7975	5420	7767	6629	7017	5640	3791	4586	7526	10598	6747	7713	6251	4336	5799	6557	6502	4050	4654	5112	4970	12627	6247	5412	4767	4990
CNAG_00295	0	0	0	0	0	0	0	0	0	0	0	0	0	0	0	0	0	0	0	0	0	0	0	0	0	0	0	0	0	0
CNAG_07347	29106	27065	25800	35203	66833	42304	19231	24073	30857	47320	41062	36263	34093	34756	30944	62749	37948	33441	22821	24501	26275	47541	54428	36665	21700	54490	27418	55731	39565	55129
CNAG_07348	4224	3896	3607	2318	4042	2693	2930	3542	5230	3990	3623	2494	4664	4680	4247	3843	2425	2106	4495	4699	4398	2698	3236	2725	3427	7827	4023	4573	3730	3866
CNAG_07349	4256	4327	4079	2653	4020	2761	3386	3957	4936	3324	2335	2299	5868	7200	5304	3472	2951	2238	3900	4664	4612	2461	2765	2983	3542	8693	4141	3592	2847	2989
CNAG_00299	3302	3294	3087	1813	2778	2281	4237	3939	5482	2211	1597	1604	3903	4488	3350	2761	2023	1795	2993	4014	3976	1258	1536	1955	3574	9197	4548	2317	2383	2098
CNAG_00300	10275	10627	10015	12906	21701	14959	10668	9176	12814	7976	7118	6018	13353	14535	12439	17340	13102	10771	8942	11298	10487	7994	9377	9071	8251	21491	10214	9139	8155	7697
CNAG_00301	29941	27492	26486	59588	99457	67480	35007	39835	51141	84947	74705	65064	38629	46523	37797	87372	64642	51120	27687	37057	32154	69964	69166	54885	32981	82016	41329	94536	73829	87924
CNAG_00302	2573	2566	2346	5138	6773	5275	1271	1363	1807	2182	1669	2007	3313	3904	3212	6457	5129	3979	1839	2271	2002	2701	3256	3933	1053	3043	1425	2340	2181	1735
CNAG_00303	268	325	288	708	1152	742	277	350	620	537	531	458	359	364	384	920	648	586	342	498	319	485	530	719	334	839	398	692	652	614
CNAG_00304	632	949	740	464	803	714	812	759	1396	557	616	467	930	1174	885	757	543	470	1169	1539	1083	425	517	525	827	1881	989	807	745	645
CNAG_00305	15604	14099	13333	9519	18142	12093	10295	8311	15536	6828	6262	5244	16481	17811	15595	16013	9983	9079	13590	15204	14509	7051	8614	7950	10077	25793	13214	7938	7577	7407
CNAG_07949	220	243	203	338	418	370	339	337	354	556	424	558	319	395	307	419	307	304	306	339	275	251	331	425	201	440	247	572	378	462
CNAG_12043	30	68	28	68	85	51	37	39	52	47	50	49	28	43	24	55	49	43	50	46	23	43	37	55	17	41	28	58	51	59
CNAG_12044	133	316	158	522	848	588	458	399	428	435	444	396	204	484	202	693	690	529	516	383	306	429	476	495	246	435	216	516	322	328
CNAG_00306	2840	2775	2646	17738	22630	14964	2409	2523	3659	4707	5438	3736	2961	3394	2993	20972	15132	11886	3121	2492	2308	15372	15812	10180	1988	4930	2485	7732	6183	5548
CNAG_00307	6250	6872	5830	4661	7781	5254	7260	6749	8665	4128	3480	3524	6945	11123	6860	6497	5147	4020	6786	7367	6521	3311	3946	4000	5158	12791	6162	4191	3645	3345
CNAG_12045	48	90	59	99	184	121	101	94	126	150	162	166	63	96	83	105	117	88	102	107	65	85	94	75	77	153	55	179	107	112
CNAG_00308	5795	6052	5618	5680	10143	6169	6699	8397	8299	7322	4859	5880	7893	10537	7300	8815	6672	4957	6158	7113	7454	5617	6181	6026	6058	15290	7302	6559	6429	6246
CNAG_00309	7541	7504	7657	12752	23918	15192	7633	10341	12860	13937	12183	10882	10884	11534	9966	21070	13416	11556	7846	10147	9525	12873	15045	13574	8665	22396	11024	15674	14256	14959
CNAG_00310	2110	1900	1871	1567	2666	1823	2309	1921	2323	1994	1294	1394	2339	2708	2052	2588	1770	1419	1690	1865	2155	1217	1573	1632	1638	4057	2141	1921	1610	1716
CNAG_00311	13744	13995	12351	18817	32341	20382	14112	11736	15428	18256	11663	13696	15924	19386	14860	26983	19793	15169	12169	13414	13971	12369	15138	20170	10450	26549	13061	15428	20084	13932
CNAG_00312	2333	2076	1954	1416	2652	1668	2658	2310	3258	2263	1916	1818	2638	3490	2340	2443	1578	1424	2311	2930	2630	1510	1400	1632	1981	5201	2658	2341	2146	1940
CNAG_00313	2922	2707	2777	3116	5474	3414	3466	3469	4464	3558	2897	2856	3711	4366	3376	4706	3339	2787	2960	3311	3354	2867	3249	3138	2800	7222	3573	3680	3579	3424
CNAG_00314	1946	1828	1771	3418	6173	3870	2348	2299	3470	7260	6143	5421	2446	2868	2336	5229	3765	3135	1615	2466	2255	3864	4573	4150	2414	5662	2821	8179	6975	7647
CNAG_12046	298	301	275	644	1091	733	535	345	601	2991	2879	1917	443	434	430	939	464	423	361	407	308	1138	1297	1007	428	791	390	4011	2490	3989
CNAG_00315	0	0	0	0	0	0	0	0	0	0	0	0	0	0	0	0	0	0	0	0	0	0	0	0	0	0	0	0	0	0
CNAG_07350	1944	2063	2054	2369	3693	2398	2593	2959	2375	8638	5253	7355	2520	3532	2175	3643	2978	1888	1616	1731	1921	4859	4768	4152	1697	4432	2151	7229	4937	6663
CNAG_00316	3549	3885	3457	2181	3423	2422	3104	2793	5028	1027	1057	967	4283	5019	4448	2848	1873	2032	4245	5330	3803	1090	1346	1537	3184	7724	3858	1218	1473	926
CNAG_12047	185	171	137	173	197	191	354	240	269	398	231	471	195	378	224	160	170	128	232	260	218	86	135	199	158	396	206	284	265	224
CNAG_00317	2554	2502	2301	2400	3688	2452	2996	2880	2915	2965	1854	2936	2787	4098	2683	3363	2888	2125	2087	2283	2288	2004	2350	2593	1918	4759	2441	2728	2587	2345
CNAG_00318	5301	5456	5064	3857	7167	4530	4400	4587	6771	4904	4190	3516	6813	7817	6552	5882	3924	3712	4695	6421	5693	3540	4040	4087	4530	10817	5659	5554	4636	4803
CNAG_00319	8715	7179	7511	3994	6575	4783	6462	5679	9726	2937	2925	2462	9811	9384	8920	6355	4011	3951	7581	8258	7880	3149	3412	3473	6384	14644	7792	4140	3793	3347
CNAG_00320	2669	2190	2155	2136	3049	2181	2857	2297	2924	2018	1311	1735	2431	3114	2215	2989	2371	1944	2160	2300	2138	1312	1676	1614	1902	4611	2311	2067	1696	2024
CNAG_00321	942	752	837	602	841	686	1136	849	974	647	527	402	894	1060	844	816	607	561	759	877	740	388	479	431	653	1484	800	701	483	614
CNAG_00322	3584	3548	3439	2710	4520	2829	3145	3810	4057	3031	2217	2531	4530	5787	4255	3963	2925	2184	2934	3816	3653	2259	2695	2576	2738	6924	3407	3096	2807	2783
CNAG_12048	615	602	540	585	1017	641	497	613	819	1268	1030	1106	733	994	787	938	726	623	638	752	518	508	634	807	489	1139	611	1244	1057	1104
CNAG_00323	54	87	72	41	23	18	29	68	59	23	18	37	62	109	81	24	40	20	58	76	51	14	11	17	52	89	67	12	21	16
CNAG_07351	8024	7903	7798	8870	13677	9383	10290	9666	11658	15081	10253	10898	10295	12152	9325	12076	9324	7056	7226	9854	9425	9766	10542	10932	8073	21755	10153	14694	12931	13272
CNAG_00326	10610	11098	9778	7766	12188	8770	10316	9405	11829	8668	6427	6812	12631	16605	11740	11323	8018	6308	8956	11273	10529	9640	9459	9427	8078	20288	10245	9122	6414	7624
CNAG_00327	854	630	648	506	611	503	1189	792	1321	403	327	289	669	960	698	528	347	474	738	981	809	246	224	279	711	1760	926	360	423	369
CNAG_00328	5585	5051	5078	2930	4835	3275	4997	5311	5930	7330	5201	5841	6837	7871	6181	4490	3203	2479	4065	5400	5489	4219	4205	4081	4464	11642	5624	7484	5891	7560
CNAG_12049	20	9	14	53	59	45	10	5	15	24	10	5	6	3	11	43	50	37	10	3	2	16	20	28	9	24	5	29	11	22
CNAG_00329	8230	7500	7037	4323	6002	4386	5910	6138	7994	3596	2507	2403	8317	10388	7841	5857	4141	3516	6719	6898	7070	2622	3226	3735	5141	12343	6449	3173	3400	2759
CNAG_00330	2871	2794	2603	3882	5237	3795	3551	3320	3287	4861	3347	4180	3293	4479	3024	5284	4181	2971	2526	2978	2754	3553	3498	4061	2306	5990	2735	4963	3900	4185
CNAG_00331	246	223	179	610	900	609	81	124	135	309	206	321	196	350	269	785	622	523	127	168	150	288	306	354	53	174	88	310	271	309
CNAG_00332	8595	7564	7750	35920	61099	41337	4727	6663	6542	20401	14650	17312	11258	13861	10011	57040	43228	32362	5967	7452	7203	22957	28721	31149	4452	11786	5950	19127	21154	17557
CNAG_00333	4941	4634	4253	1599	2325	1659	6142	4883	5495	2327	1405	2198	4993	7120	4773	2090	2020	1371	4227	5060	4516	1104	1291	1831	3353	8431	4324	2035	2238	1799
CNAG_00334	190571	174304	165505	47326	67121	57096	132978	100355	183280	35317	30694	23159	185121	203417	169475	73122	45374	40113	155643	150890	160166	37647	42308	44005	120237	289787	155556	49066	34093	40359
CNAG_00335	4875	5023	4304	5088	8013	5425	4762	4215	6220	4480	3495	3527	5875	7344	5490	6587	5289	4364	4925	5840	5109	3551	4357	4272	3989	10041	4666	4371	4108	3693
CNAG_00336	4028	3740	3634	6432	9421	6652	4670	4431	5644	7642	5470	6931	4738	6819	4990	9535	7977	6017	4122	5521	4723	5162	6139	6279	3697	9014	4303	7375	6969	6479
CNAG_00337	33918	29965	27456	34790	60939	37398	25089	28958	34301	26437	20987	22551	39517	45327	35199	53660	38554	30909	32450	32477	33767	33831	42018	31827	23886	59034	29133	28835	27324	24634
CNAG_07352	16346	15958	14922	9362	13845	9589	13306	13914	16659	9911	7418	7503	19096	25119	18146	13184	9561	7677	13764	16357	15522	7423	8223	9546	11551	27944	13518	9842	9045	8992
CNAG_07353	0	0	0	0	0	0	0	0	0	0	0	0	0	0	0	0	0	0	0	0	0	0	0	0	0	0	0	0	0	0
CNAG_07354	3197	3099	2941	1675	2824	1924	2162	2209	4052	1479	1365	1104	3876	3910	3690	2577	1547	1600	3066	3706	3297	1188	1420	1415	2772	6842	3332	1877	1782	1610
CNAG_07355	961	928	776	876	1693	1001	1101	793	1369	909	684	700	1078	1426	1095	1424	1046	698	815	1308	1171	714	822	816	845	2339	1151	1178	938	885
CNAG_10005	1	0	0	0	0	0	0	0	0	0	0	0	0	0	0	0	0	1	0	0	0	0	0	0	0	0	0	0	0	0
CNAG_00342	7672	7290	7033	5208	8103	5431	8485	8983	8068	5411	3364	4656	9198	12444	8056	7759	5872	4094	6430	6767	7124	3641	4366	4907	5667	14990	7169	4516	4498	4493
CNAG_00343	2981	2804	2526	2085	3105	2199	3030	2663	3295	2061	1624	1883	3025	3891	2927	2988	2390	1844	2501	2778	2894	1895	2076	1908	2379	5372	2543	2059	2011	1984
CNAG_10006	0	0	0	0	0	0	0	4	0	0	0	0	0	0	0	0	0	0	0	0	0	0	0	0	0	0	0	0	0	2
CNAG_00344	3248	2612	2739	1375	2260	1558	3233	2743	4144	1511	1282	1176	3354	3867	3184	2048	1366	1197	2676	3129	3157	1196	1549	1382	2589	6419	3339	1743	1856	1697
CNAG_00345	7092	7190	6775	3788	6246	4017	5655	5852	6924	5259	3813	3831	7994	9792	7113	6096	3899	3052	5895	6403	6432	4237	4350	4511	4857	11904	5966	6181	4243	5313
CNAG_00346	2652	2441	2480	1739	3073	1807	2497	2420	2567	3009	2094	2361	2634	3985	2607	2675	1988	1544	1740	2228	2135	2175	2097	2069	1702	4141	1952	2795	2056	2606
CNAG_00347	7503	6702	6862	3463	5912	3997	7190	7221	9717	4431	3297	3324	8544	9552	7888	5466	3468	3096	6562	7886	7710	3448	3904	3572	6625	16611	8151	4950	4237	4455
CNAG_00348	564	600	539	818	1257	762	632	792	886	1243	908	913	856	909	722	1170	816	655	590	629	549	902	916	709	563	1413	665	1179	746	1214
CNAG_00349	877	905	745	331	438	368	933	927	993	141	122	95	842	1157	804	452	426	305	695	670	647	405	345	261	478	1009	524	143	65	129
CNAG_12050	251	184	161	272	307	191	275	236	349	245	147	171	216	385	230	290	277	225	269	285	256	155	269	213	211	493	219	247	197	206
CNAG_07356	25184	24782	22472	28543	46505	30982	24654	26202	30381	21496	16459	16795	29163	37925	27398	39559	31789	24087	23888	25094	24913	18815	23257	24733	19642	46208	24864	21938	22062	19514
CNAG_07253	1818	1623	1613	1348	2448	1625	1518	1210	2669	1137	1427	961	2272	2231	2076	2180	1468	1437	2006	2746	2099	1177	1433	1459	1692	3778	1864	1690	1519	1356
CNAG_00351	1574	1818	1343	1888	2390	1643	2577	1960	1923	1614	959	1200	1588	3090	1575	2272	1992	1381	1557	1727	1664	1418	1578	1783	1174	3105	1558	1365	1056	1024
CNAG_00352	4366	4712	3895	3265	5636	3571	5029	4238	6154	3522	2735	2924	5322	7118	5337	4590	3392	2919	4371	6145	5039	2406	3250	3312	3881	9404	4662	3276	3501	3019
CNAG_00353	1603	1591	1431	1046	1786	1224	1439	1371	2219	1203	1161	922	1926	2205	1833	1423	1073	1000	1635	1893	1820	837	984	1030	1396	3342	1844	1478	1444	1153
CNAG_00354	26350	23514	22890	27433	44508	31262	25952	25042	31114	25116	18554	19611	30428	37281	28928	40485	29385	24444	20700	25979	24331	19292	24053	25010	19863	51018	24272	23444	24203	21190
CNAG_00355	9621	11771	8600	6710	9740	6584	16291	13591	12767	10145	6161	11107	12008	22575	11828	8055	8181	5590	9049	14037	10109	4766	5690	7548	8359	19277	8845	7864	6144	6628
CNAG_00356	15074	14562	13526	12113	20445	13325	12390	13096	19529	13779	12415	10356	19099	21250	17349	18206	12510	10197	15239	18318	16784	11012	12635	12975	12531	31827	15654	16725	15166	14642
CNAG_00357	891	1021	833	932	1486	1058	869	845	1248	1313	1187	1247	1049	1226	992	1342	1003	697	862	1049	1057	1048	1154	1036	716	1742	979	1536	1080	1360
CNAG_00358	2017	2148	1954	1505	2357	1673	2381	1643	3060	1529	1191	1221	2541	2811	2109	2374	1602	1308	2056	2632	2166	1299	1547	1708	1672	4334	2232	1911	1444	1504
CNAG_00359	1945	1615	1509	1189	1535	1087	2835	2642	2397	1293	987	1240	1852	2701	1601	1456	1159	929	2170	2525	2358	743	877	905	1525	3854	1946	1191	1355	1121
CNAG_12051	109	139	86	107	215	119	142	89	182	284	293	225	132	220	115	164	141	121	122	138	104	138	146	112	128	262	113	296	222	334
CNAG_00360	1223	1473	1207	1266	1863	1276	2174	1905	1936	2217	1496	2286	1562	2849	1651	1585	1461	1002	1222	1957	1454	1121	1213	1334	1235	3095	1450	1892	1509	1666
CNAG_00361	11241	10610	10109	8551	14831	9472	8921	9642	11624	6753	5578	5705	14079	15567	12314	13378	8937	7085	9736	11037	10677	7042	7933	8604	8031	20494	10486	7429	7848	6332
CNAG_00362	3968	3873	3233	2808	4752	3263	4746	3780	5038	2854	2133	2475	4121	5802	3836	4277	3226	2550	3447	4284	4030	2808	3143	3034	3182	7564	3845	2789	2416	2436
CNAG_00363	27822	26780	25766	15151	23006	16001	23912	25431	31205	32841	24895	24310	35107	39680	29565	23392	15220	11883	24303	26140	27789	23046	24487	19761	21731	56544	27554	37780	24571	36216
CNAG_00364	3518	3527	3005	2370	3678	2571	4145	2973	4713	2307	2005	2043	3859	4816	3732	3319	2417	2055	3515	4374	3628	1765	1943	2181	2900	7160	3404	2614	2148	2320
CNAG_00365	6544	6248	5975	4809	8461	5226	5712	5927	8317	5325	4184	3973	7873	8757	7220	7478	4796	4327	5897	7423	7192	3757	4753	4725	5705	14054	7226	5518	5159	5168
CNAG_12052	56	72	72	144	200	159	249	148	232	228	139	215	100	103	84	226	140	124	111	175	128	103	123	188	105	286	121	224	175	167
CNAG_00366	212	193	246	435	851	592	210	187	351	752	485	522	228	345	233	778	497	359	173	322	195	435	424	602	179	470	235	785	691	723
CNAG_00367	1661	1711	1488	1026	1694	1139	2100	1545	2280	1301	1025	985	2172	2857	2044	1306	939	836	1607	2303	1874	891	1032	1091	1528	3694	1840	1291	1140	1220
CNAG_00368	4579	4252	4098	2990	5077	3593	4492	3807	5836	3931	2864	2827	5540	6027	5041	4898	3423	2645	3997	4537	4886	3373	3702	3458	3704	9249	5032	4226	3612	3991
CNAG_00369	4788	5288	4426	5227	9100	6037	5115	4716	7650	5503	4887	4173	6383	7870	6054	7365	5115	4765	5656	8021	5742	3561	4740	4378	5070	11336	5502	6288	5372	5573
CNAG_10007	0	0	2	0	1	0	0	0	0	0	0	0	0	0	2	0	2	0	0	0	0	0	0	0	2	0	0	0	0	0
CNAG_00370	52494	51353	46383	13849	21796	16357	40145	28945	54762	8025	7805	6055	49925	62897	50819	20479	12965	12999	47921	51375	49045	7924	10349	10837	36664	82792	42799	9436	9323	7500
CNAG_00371	1374	1548	1247	12809	25288	14681	1175	1292	1870	19861	17348	15190	1688	1822	1673	20760	14383	11984	1415	1564	1434	13627	15615	16073	1191	2956	1466	22905	21062	22082
CNAG_00372	5648	5254	5056	7251	11845	7683	6468	6380	6644	12534	8120	9983	5957	8440	5926	10577	8491	6214	4439	5311	5548	7038	7918	8148	4302	11275	5388	11485	9346	10728
CNAG_00373	985	971	944	2420	3994	2992	1198	681	949	2054	1117	2024	1044	1460	911	4089	3331	2090	549	678	631	1487	1864	1858	611	1164	623	1461	1278	1286
CNAG_00374	4113	3614	3541	10788	15976	9790	3646	4142	4598	18834	15168	14671	4038	4844	4055	14338	9992	8158	3098	3364	2901	15828	15756	12132	3055	7145	3585	22304	14060	18963
CNAG_00375	9577	8869	8242	4506	7396	5350	10820	8243	10729	7025	4724	5482	9626	12600	9109	6760	5173	4162	7781	9437	9132	4054	4813	5082	7062	17038	8713	6619	5929	6144
CNAG_10008	14	13	7	11	11	2	10	6	8	14	24	8	15	13	7	15	3	0	15	6	9	3	4	14	0	11	5	20	9	24
CNAG_10009	6	6	2	6	1	6	1	0	13	8	4	6	5	11	13	1	2	3	4	9	10	10	4	1	7	8	9	16	17	9
CNAG_07357	103	88	74	60	59	74	76	70	133	91	87	81	67	107	94	60	57	54	103	53	78	60	70	56	60	174	95	103	91	117
CNAG_00376	97	113	60	79	175	141	92	91	179	181	173	138	134	121	122	207	135	103	92	144	108	108	125	148	112	311	169	270	166	238
CNAG_00377	16480	12838	12775	9601	12144	9895	21354	11592	19348	6970	5446	5287	12220	15877	11816	12468	9245	9652	13464	13533	13324	6312	7209	7232	10893	26519	13933	7667	7252	6690
CNAG_12053	28	34	34	105	143	99	41	34	101	108	120	101	55	96	49	157	136	128	59	82	30	61	90	81	35	110	47	145	137	124
CNAG_00378	1288	1489	1249	1148	1771	1222	2128	1633	2408	1696	1198	1617	1811	2475	1621	1613	1273	1013	1409	2118	1721	802	1094	1412	1377	3450	1498	1635	1479	1293
CNAG_07950	1014	1316	1240	1981	2888	1830	1640	1743	1735	1939	1235	1636	1758	2002	1603	2615	2613	1462	1565	1813	1780	1539	1548	2262	1656	3332	1553	2261	1983	1903
CNAG_12054	153	142	185	314	540	402	243	193	252	534	540	581	201	370	256	676	478	449	231	273	182	438	435	485	112	335	132	618	534	540
CNAG_07358	925	884	939	965	1677	1242	933	1028	1609	1589	1347	1135	1317	1603	1388	1548	1021	891	1022	1424	1094	1028	1189	1251	1019	2613	1298	2073	1884	1824
CNAG_00383	12850	11956	11596	10698	18202	12839	12578	12724	16538	10969	8167	8287	15558	17953	14258	17359	11944	9752	11569	13564	14089	8717	10719	10837	10793	28894	14286	11495	11843	10958
CNAG_00384	1769	1681	1562	655	931	745	1909	1673	2543	728	485	544	2212	2614	1879	875	592	570	1527	2168	1905	260	370	601	1545	3768	1844	678	822	434
CNAG_00385	13140	14757	12141	8434	13270	9168	17389	15572	19323	8199	6226	7148	16690	24627	16088	10564	8900	7350	14710	20312	16257	5698	6961	8007	12352	30134	14728	7532	7107	6215
CNAG_00386	12943	11551	10862	6278	8415	6719	11497	9039	13664	5555	4450	3938	12253	13910	10938	9145	6370	4852	11197	10976	12307	6407	6288	7302	9014	22784	12091	7159	5028	5845
CNAG_00387	3061	2823	2810	2243	3689	2581	3480	3286	4132	2834	2213	2263	3726	4321	3605	3511	2240	1744	3086	3402	3282	1780	2135	2300	2787	6760	3426	3024	2943	2901
CNAG_00388	8667	7253	7691	5690	8692	5928	10631	10186	10860	8569	5703	6966	9648	13047	8704	8431	6192	4583	7280	8498	8326	4473	5250	5499	7263	18559	9281	7912	7146	7054
CNAG_00389	4497	4120	4153	3686	5753	3909	3454	3779	4576	2773	2106	1946	5270	6702	4936	5327	3858	3054	3743	4303	4007	2619	3515	3147	3204	7610	3928	2749	2697	2468
CNAG_07951	1126	1152	1034	735	745	623	1108	818	1296	528	539	349	1096	1440	1119	790	696	419	955	1237	972	545	563	778	688	1672	900	933	389	577
CNAG_00390	4727	4139	4154	3973	6397	4316	4782	5065	5572	4445	3242	3943	5622	7038	5503	6215	4227	3359	4084	4349	4673	3537	3938	3808	3811	9670	4799	4457	4339	4259
CNAG_00391	515	555	530	444	538	503	417	467	761	372	367	239	664	680	573	610	368	275	526	688	715	345	380	398	463	1137	646	489	403	427
CNAG_00392	1147	886	990	1219	2234	1462	941	848	1236	1222	965	854	1183	1383	1070	2133	1274	982	931	1192	1056	1001	1208	1242	849	2035	1063	1347	1086	1336
CNAG_00393	19202	20750	19513	45537	92657	55732	23610	19253	41370	105320	98576	73303	24572	25421	23588	81408	47516	42369	19747	25282	22829	80097	82000	63900	25410	59984	31629	140690	94890	124169
CNAG_00395	3545	3538	3194	3478	5135	3651	3441	2900	4780	3482	2962	2985	4081	4981	4142	4439	3040	3179	3241	4538	3696	2480	3265	3531	2894	6616	3352	4095	3866	3322
CNAG_00394	606	701	538	1081	1454	1151	687	441	838	871	1040	563	582	775	588	1301	1097	932	736	904	600	980	1128	789	553	1004	523	1347	632	1022
CNAG_00396	6777	7094	6394	5490	9024	6218	8285	7700	10912	13946	11502	11931	9277	11075	7893	7918	5741	4927	7376	9178	8340	5588	6145	6221	6851	17445	8356	16649	11041	14823
CNAG_00397	1067	1009	921	20644	34237	23054	975	896	1157	14129	11164	11684	1201	1483	1204	31596	22478	18647	914	956	966	12517	15197	15068	737	1881	888	14176	15568	13072
CNAG_00398	7514	7717	7814	8148	12261	8382	8922	10412	8578	7613	5094	7327	9966	13888	9954	11604	8946	6169	6470	7263	6985	5640	6285	7155	5257	14509	6891	7058	6876	6228
CNAG_00399	5041	5126	4572	1190	1808	1168	7554	5351	8910	7470	5701	5214	6215	6766	5413	1635	1182	1014	5425	7208	6755	2687	2467	2271	6151	15367	7495	7435	5516	6604
CNAG_00400	4943	5866	4645	2284	3671	2116	7144	6634	8989	8585	7089	8316	6140	7713	5544	3339	2362	1829	5875	7789	6309	4284	4116	3215	6518	14406	6863	9293	5845	8487
CNAG_00401	3832	4080	3608	4330	7646	4706	4969	4783	6433	5121	3658	4099	5055	6092	4860	6261	4907	3858	3973	5285	4709	3392	4192	3944	3905	10342	5073	4890	4816	4255
CNAG_00402	36818	33168	31858	25944	42268	28405	32896	34259	40351	34211	23991	25466	42592	48441	37912	42267	28846	21144	28873	32365	34160	25894	27770	23970	27584	72730	34848	34876	26729	32705
CNAG_00403	2356	2324	2135	3940	6707	4427	2447	2206	2907	3661	2776	3608	2738	3438	2636	5614	4073	3483	1972	2326	2388	2310	2857	3218	1848	4823	2236	3811	3779	3441
CNAG_12055	2	10	7	1	0	0	13	17	10	5	6	6	10	23	12	5	2	1	17	21	4	1	2	3	4	24	5	0	2	4
CNAG_10010	0	0	0	0	0	0	0	0	0	0	0	0	0	0	0	0	0	0	0	0	0	0	0	0	0	0	0	0	0	0
CNAG_00404	3879	3374	3550	4614	7052	4478	3244	4539	3789	6416	4171	5238	5220	6374	4732	6871	5165	3512	2770	3573	3669	3942	4398	4936	2962	7841	3606	5639	5520	5410
CNAG_00405	7636	7125	6882	4761	7136	4746	8901	9356	7699	5492	3110	5181	8940	13387	7766	7022	5895	3669	6053	6673	7197	3529	3945	4576	5202	14211	6647	4435	4501	4179
CNAG_00406	1243	793	911	676	662	619	1326	634	1104	289	268	243	700	1121	678	704	589	649	775	829	714	184	293	293	595	1212	732	274	326	244
CNAG_12056	52	77	36	446	594	368	78	49	65	619	409	621	50	116	63	531	402	296	52	62	50	275	304	351	38	127	51	459	347	437
CNAG_00407	505828	492486	484889	165900	322292	194529	366077	720923	554998	81127	52318	58074	775991	895295	694669	296811	205049	152414	478352	518720	547039	132755	152014	131388	367721	991745	472046	65670	77438	57054
CNAG_00408	3515	3276	2928	6376	9776	6660	3676	3014	4079	7431	6244	6260	3369	4458	3504	8508	6465	5402	3350	3639	3032	6590	7590	5442	2581	5778	3027	8998	5241	7074
CNAG_00409	20577	20103	18414	15399	24928	16786	20482	21700	23681	12314	8056	9847	25026	31512	23983	22521	16951	14038	18851	21866	21822	10477	13423	12918	17713	44200	21042	11001	12016	9789
CNAG_00410	15367	14767	13726	10772	18285	12171	13187	14616	17065	11485	8156	9557	18324	21514	16527	16891	11563	9198	13198	14632	15677	8435	10146	11100	12631	31970	15053	10874	11492	10448
CNAG_00411	5024	4695	4256	3290	4862	3500	5372	4545	5502	4076	2859	3319	5214	6687	4806	4627	3600	2831	3972	4745	4425	2386	2941	2939	3505	8889	4236	4088	3246	3293
CNAG_00412	284	327	245	555	646	498	373	363	565	595	488	518	402	507	439	640	500	417	376	577	384	284	406	423	344	837	446	576	592	487
CNAG_00413	22600	20130	19363	20589	32779	20653	18810	23009	29319	11279	10680	8471	25215	29103	23603	29421	20554	17595	22067	23162	22821	18143	22515	16567	18292	45394	23333	14562	11521	12510
CNAG_00414	2543	2297	2223	1903	3472	2062	2383	2543	3641	1273	1188	1095	3160	3831	3049	2484	1824	1627	2939	3541	3128	1315	1697	1410	2382	5611	2809	1450	1402	1179
CNAG_00415	2000	1779	1878	2335	3608	2443	2438	2001	2188	2508	1540	1838	2303	3041	2218	3289	2519	1966	1558	2031	1915	1316	1741	1698	1547	4038	1878	1935	1998	1870
CNAG_00416	818	717	627	985	1709	1115	824	657	1064	869	732	763	780	922	820	1503	1012	881	750	772	744	822	989	992	723	1624	799	963	1024	1034
CNAG_00417	81386	76483	74877	40480	66730	48724	59503	51749	86941	35283	29384	24956	90125	96603	82389	65132	42110	37118	70604	73554	76750	29389	36533	36287	57313	138406	72030	41116	36956	36973
CNAG_00418	24810	21068	19504	11772	12523	10687	16194	11179	18282	5189	5210	3105	19212	22465	17362	15307	9200	7851	17945	16162	16915	10408	10503	9733	11218	26583	14534	9079	4286	6043
CNAG_12057	1162	1225	1038	1117	1704	1305	1686	1516	1572	2393	1557	1888	1550	2229	1443	1575	1160	966	1110	1390	1248	1268	1239	1374	979	2407	1251	2198	1695	1888
CNAG_00419	410	395	325	226	365	254	619	454	790	539	434	451	423	589	464	351	203	178	472	590	517	287	325	329	447	1089	608	595	590	573
CNAG_00420	2514	2574	2251	1909	2986	2045	3449	2846	3141	1988	1523	2050	2971	4741	2847	2511	2411	1626	2400	2778	2663	1615	1572	1631	1976	4884	2550	1852	1768	1503
CNAG_00421	4219	4162	3564	2619	4084	2525	5609	5840	5459	2810	1966	2449	4616	7700	4618	3137	2840	2391	4161	5423	4322	2212	2602	2250	3607	8132	3885	2618	1894	2066
CNAG_00422	6445	5635	5325	2988	5127	3445	7706	6202	7323	3469	2078	2662	6444	9034	6045	4811	3594	2537	4966	5954	6005	2348	2672	3238	4941	12839	6165	2735	3301	2825
CNAG_00423	881	721	606	549	447	533	1497	605	1315	161	95	81	474	815	529	465	426	677	807	1009	707	73	159	147	620	1298	748	154	156	107
CNAG_00424	4780	4969	4382	3877	6752	4542	5206	5228	5302	7704	4949	6297	5902	7319	5169	6523	4538	3199	4245	4588	4800	5434	5763	5214	3754	9784	4903	7302	4869	7219
CNAG_00425	0	0	0	0	0	0	0	0	0	0	0	0	0	0	0	0	0	0	0	0	0	0	0	0	0	0	0	0	0	0
CNAG_00426	8154	8127	7582	4753	6717	4624	7713	8698	8348	6680	4214	5610	9566	13209	8706	6323	5318	3747	6858	7044	7631	4275	4093	4819	5986	15231	6985	5846	5331	5888
CNAG_00427	5717	5007	4910	3283	4670	3383	4228	4423	7005	2447	2269	1911	5928	6233	5717	4606	2891	2744	4958	5618	5298	2458	2659	2757	4397	10699	5479	3016	2821	2531
CNAG_00428	2775	2670	2218	2078	2894	2146	3606	2517	2787	2593	1605	2560	2645	4548	2558	2604	2390	1656	2051	2250	2413	1328	1410	1715	1835	4861	2487	2343	1861	2200
CNAG_00429	420	454	435	430	417	402	380	279	468	266	340	190	367	462	336	489	333	254	399	416	423	484	445	650	285	759	381	494	309	389
CNAG_00430	609	695	590	825	1256	944	769	616	622	812	518	610	688	1032	702	991	946	631	501	620	613	634	758	753	443	1052	559	812	564	550
CNAG_07359	20344	18886	18257	10916	16384	11747	17135	20374	23305	16406	12406	11840	25465	29609	23173	15284	11161	8791	16568	19715	19903	12672	12912	11734	16650	42004	20289	18802	13087	16546
CNAG_00433	1426	1458	1234	27054	44141	29811	1471	1831	2096	16245	13008	13206	1715	2378	1726	39977	28916	22904	1486	1697	1661	20083	24297	25491	1349	3285	1781	17053	18656	15369
CNAG_00434	2794	3160	2494	1240	1941	1357	2678	2198	4208	1076	1093	779	3062	4025	3048	1794	1338	1241	3071	4080	3131	947	1230	1548	2642	5797	3127	1443	1439	1207
CNAG_00435	1218	1097	939	857	1293	919	1301	1143	1494	1140	947	879	1323	1774	1107	1210	875	680	928	1132	1118	751	940	1164	849	2084	1026	1132	1030	1034
CNAG_00436	8285	6973	7076	5734	9267	6388	6184	6565	8939	4469	3769	3307	9605	10333	9158	8564	6029	5054	6892	7910	7585	4060	4702	4390	6036	14434	7098	5165	4664	4496
CNAG_00437	1061	1125	985	1259	2242	1360	1151	1062	1524	1118	960	799	1218	1406	1276	1573	1329	1148	1192	1455	1115	841	932	907	983	2114	1081	1256	936	1073
CNAG_00438	2162	2210	1942	1320	2016	1400	2423	2552	2294	1313	809	1034	2531	4045	2617	1581	1597	1081	1665	2224	1925	945	1071	1233	1471	3936	1812	1237	950	956
CNAG_00439	5998	5364	5095	4562	7685	4906	5411	4989	7205	4659	3538	3354	6315	6699	5959	7076	4823	3964	5173	5485	6037	3534	4400	4526	4708	12909	5977	5388	5222	4720
CNAG_00440	1857	1952	1605	1396	2230	1465	2172	2031	2894	2119	1770	1784	2272	3182	2429	1844	1613	1267	1712	2969	2091	1235	1474	1563	1938	4567	2103	2200	1841	1876
CNAG_00441	33986	28181	28057	15387	17041	14149	21068	20279	35802	9085	10224	5312	32364	32421	30882	19298	12372	10520	29072	27370	29660	14856	14447	12271	22407	52394	28967	16554	9281	11357
CNAG_00442	5458	3142	3460	61660	59065	44263	2018	2489	2359	36273	25779	28393	3615	4865	3753	65025	56508	40382	2840	2599	2225	35800	42170	36489	2039	3821	1880	38245	28970	30409
CNAG_00443	1052	1019	907	2175	3161	2261	807	772	1040	1533	1310	1088	1216	1435	1220	3092	2235	1984	884	1092	837	1628	2209	1927	675	1629	899	1919	1575	1731
CNAG_00444	3150	3504	2685	1252	2321	1480	2872	2084	2917	876	767	949	3395	5531	3373	1739	1269	1269	3171	4387	3078	816	1060	1192	1942	4104	1911	978	1039	729
CNAG_12058	136	96	124	67	123	56	214	103	174	98	83	84	114	123	94	85	76	53	165	133	139	44	63	54	103	265	150	131	68	94
CNAG_00445	9607	9615	8655	27146	41172	26690	9725	9261	9517	24460	16785	21020	10954	14087	10099	39204	30678	21091	6918	7901	7649	22673	26085	22976	6492	15976	8103	23145	17469	21413
CNAG_00446	42	55	35	206	194	148	37	32	44	107	113	175	27	65	44	159	177	177	32	25	18	65	141	114	29	65	22	120	124	71
CNAG_00447	14771	14373	13201	6886	12819	8861	13247	10624	20126	5876	5423	4648	16315	18445	15425	10526	7252	7043	14729	18078	16642	5108	6364	6465	12631	31536	16080	6739	6569	6181
CNAG_00448	11833	11035	10397	5066	9197	6742	7639	7910	15556	4226	4899	3067	13941	14005	13726	7615	4849	4989	12117	14497	12702	4471	5534	4982	9459	22713	12182	5998	5727	5526
CNAG_00449	3483	4117	3262	5388	5549	5013	3587	2885	4189	3501	3275	2304	3867	4432	3217	6245	4723	3354	3704	3314	3362	5553	5878	5551	2520	6406	3139	5573	2483	3797
CNAG_00450	14797	14168	13536	11288	19103	13858	11506	11606	16933	6775	6113	5042	16485	18592	15522	17730	12118	10521	15568	14925	16215	8200	10186	8597	11467	26969	14270	7768	8068	7047
CNAG_00451	1358	1197	1214	1832	2889	2072	1727	1671	2615	976	823	798	1381	1711	1222	2761	2047	1444	1545	1738	1908	1098	1338	1460	1809	4072	2003	1200	1292	950
CNAG_00452	443	511	348	33761	62810	38042	544	510	831	18271	14852	16261	536	659	492	51251	37530	31030	510	592	557	19011	22736	25685	472	1231	593	18798	20775	16739
CNAG_00453	40334	39438	35337	147683	314669	165883	38529	57531	65425	120333	137594	86306	44196	51538	44179	242867	154085	144212	48782	54184	44655	224952	216072	86081	41505	95512	49267	188251	60470	171707
CNAG_00454	3025	3140	2503	1869	3025	2078	4071	3339	3760	2078	1610	1419	3119	5683	3072	2647	2053	1710	2862	3870	2974	1798	1966	1180	2520	5898	2599	2092	1142	1620
CNAG_00455	3942	3952	3486	4673	6171	4609	3962	3586	4702	4697	3422	3209	4202	5192	4026	6447	4489	3087	3634	3515	3880	5900	5910	6297	2993	7940	4028	5546	3823	4370
CNAG_00456	9191	7915	7455	134169	187721	121368	13249	15792	17006	40369	36888	31869	10238	10993	8813	163556	130975	111602	15074	15071	14234	88007	104940	80051	10380	25259	12503	59532	47475	51132
CNAG_12059	606	658	519	999	1338	1074	952	813	763	1285	927	1468	756	1219	787	1266	1293	782	716	865	666	516	806	847	407	936	407	1199	744	923
CNAG_00457	137890	135023	127411	139273	238261	157460	107642	120667	164620	292971	240274	215984	158030	183533	149709	222325	153576	115626	132309	133811	140741	213853	222745	195590	104405	256559	133853	347401	239826	329952
CNAG_00458	7091	6922	6522	7192	10035	7061	6339	6070	7841	5608	4464	4501	8179	10120	7570	9576	7191	5584	6078	6665	6460	5031	6477	6013	5089	12457	6508	6378	4525	4990
CNAG_07360	2896	2575	2555	2783	3837	2613	2373	2482	3023	3469	2763	2637	3175	3934	3069	3673	2694	1938	2328	2506	2704	2831	2832	2427	2062	5180	2605	3725	2583	3567
CNAG_00460	2174	1893	1963	1954	2490	1829	2620	2439	2643	2315	1467	2348	2536	3347	2288	2522	1996	1589	2066	1978	2170	1125	1414	1678	1780	4438	2199	2003	2055	1833
CNAG_00461	12329	12331	11921	5627	10042	6795	12053	13061	15263	8306	5557	6875	15968	19509	14653	9795	6729	4831	10904	13204	14204	5857	6333	6273	11044	29414	13702	7697	6892	7142
CNAG_00462	12354	12877	11432	21529	37723	23866	11328	9807	16946	16091	13971	13131	14887	15849	13642	32631	21848	19336	12169	14691	14277	16795	19319	18306	10656	25767	12883	18793	17055	16918
CNAG_12060	1867	2162	1846	2316	3850	2922	2460	2741	3414	4053	3601	3469	2666	3770	2745	3240	2504	2282	2321	3222	2211	1808	2348	2971	1959	4925	2304	4429	3978	3820
CNAG_00463	4	1	3	1	3	9	5	7	6	2	2	0	3	15	3	5	2	0	5	3	7	2	4	6	0	2	9	2	6	2
CNAG_00464	22120	19172	19647	12629	22680	15874	16380	18168	26372	12813	10823	9106	25850	26380	22677	21114	12321	12441	19660	20709	22123	10699	12738	13161	18036	43743	22575	16342	14660	14108
CNAG_10011	0	0	0	4	3	2	1	0	0	1	0	0	0	0	0	0	0	0	1	0	0	0	0	0	0	0	0	0	0	1
CNAG_10012	0	4	0	5	0	1	8	2	2	5	4	7	1	2	2	0	0	0	1	5	2	0	2	4	3	3	0	0	0	1
CNAG_00465	11056	12137	10829	9591	17997	11009	7470	11701	16615	29317	35029	21395	15887	16404	15341	14147	8082	8401	11102	14736	12101	30130	25038	16993	12426	25768	13153	42544	21655	36432
CNAG_00466	1982	2195	2055	1095	2071	1310	1215	1241	2928	952	1348	677	2585	2416	2495	1615	1017	1053	2117	3036	2327	1152	1284	938	1821	4373	2107	1532	1250	1393
CNAG_00467	1232	1037	1038	969	1361	948	1717	1036	1466	843	697	734	1083	1534	1117	1254	958	756	1078	1192	1056	573	723	677	932	2183	1128	895	792	762
CNAG_00468	8634	7613	7422	4460	7100	4721	7805	7693	10354	5574	4534	4236	9742	11105	9241	6545	4378	3871	7716	8094	8177	4513	4936	4497	6971	16779	8402	6223	5802	5946
CNAG_00469	5839	6153	5212	3645	5936	3844	7614	7439	6425	9888	5510	8619	7142	11436	6255	5380	4639	2723	4667	5413	5602	4435	4672	4462	4276	11266	5368	8761	5346	7883
CNAG_00470	2287	2538	2237	2247	3521	2236	2323	2197	2968	3086	2636	2379	2666	3641	2690	2616	2108	1864	2294	3062	2534	1836	2083	2120	2024	5258	2363	2874	2244	2704
CNAG_00471	3746	4037	3421	3009	5302	3735	3397	3266	5403	2953	2869	2342	4165	5546	4181	4405	3240	3170	4081	5219	4189	2264	2739	2824	3395	7685	3960	3600	3226	2945
CNAG_10013	0	0	0	0	0	2	0	0	2	4	0	1	0	1	0	7	0	2	1	0	2	0	1	4	0	0	0	0	0	0
CNAG_00472	2102	1915	1823	1104	1858	1294	2586	2104	2545	810	509	627	2025	2978	2076	1594	1389	1085	1951	2553	2152	637	801	799	1804	4283	2150	623	820	553
CNAG_00473	3040	3165	2508	1688	2832	1817	2487	2191	3326	1003	916	790	3500	4470	3366	2077	1648	1535	2767	3625	3009	1142	1242	1090	2140	5079	2450	1159	1120	1048
CNAG_00474	1213	1486	1085	2707	5037	2865	711	596	1104	1279	1130	1148	1680	2077	1587	4122	2588	2142	1614	1759	1537	2079	2568	2215	718	1804	827	1759	1444	1506
CNAG_00475	3239	2570	2413	6535	8718	6900	1443	1182	1414	2925	2051	2469	2966	4015	2559	8310	6689	5654	1826	1704	1565	4018	4497	4867	1011	2169	1128	3251	2830	2617
CNAG_00476	57	88	33	151	177	141	115	98	141	238	190	170	80	123	64	142	109	105	88	100	88	92	128	175	76	118	83	225	206	184
CNAG_07361	6310	7157	6138	9867	16664	10931	8120	7362	9590	6791	6138	6665	8198	11952	8469	13541	10941	9427	7356	10676	7553	5679	7346	7938	6597	15833	7239	7042	6979	6043
CNAG_07362	8546	8342	7243	10287	10730	10314	6365	4590	9225	3862	5470	2330	8077	8294	7061	12753	7857	6366	8934	7426	7846	11328	11002	10836	5427	13152	7133	9670	4316	5469
CNAG_07363	18253	13935	14587	12844	21646	17416	9495	8655	19198	8293	9233	5247	16391	14945	16152	21083	11682	12520	14462	14675	15463	12005	14801	11118	12335	28368	15825	12789	10616	11056
CNAG_12061	20	14	12	5	11	3	37	25	25	35	9	22	20	34	18	1	11	3	26	12	22	11	6	8	16	20	23	20	8	11
CNAG_00480	8321	8570	7624	3676	5465	4365	10764	9162	10960	10711	6365	8361	9873	13294	8584	5291	3653	2669	6789	7915	8154	6870	6432	6117	7314	18959	9129	9271	5713	9376
CNAG_00482	8508	8655	7986	5014	8429	5539	8407	7668	9725	7364	5520	6432	10562	13161	9797	7597	5497	4715	7505	8621	8703	5162	5774	5050	6335	16292	8313	7968	6174	7376
CNAG_00481	0	0	0	0	0	0	0	0	0	0	0	0	0	0	0	0	0	0	0	0	0	0	0	0	0	0	0	0	0	0
CNAG_00483	115579	103270	103477	54713	99829	73702	72576	82967	126787	45540	40273	31396	138879	135695	128061	94819	60889	56961	100430	102405	111879	44296	53671	57392	87442	212990	112732	51069	57513	50483
CNAG_00484	3385	3386	2947	38420	63370	41221	3077	3465	4319	25393	20855	21507	4156	5721	4254	54018	41853	34263	2950	4021	3548	26505	29797	28656	2726	7199	3489	27445	25381	25316
CNAG_00485	27703	30507	26099	33381	70528	44560	24058	30903	48155	38399	37444	31591	41342	50601	40632	53696	37599	33645	29717	44638	34421	40286	50611	33477	33379	74984	36762	42942	33068	39273
CNAG_00486	5901	5917	5449	6396	8782	6211	6770	6854	6928	3670	2842	3607	6645	10064	6265	8132	6815	5176	5500	6374	5902	4325	5307	4721	4402	10394	5316	3567	3056	3081
CNAG_00487	896	885	739	914	1352	1061	1115	952	1349	505	371	502	1022	1351	991	1262	1200	867	1018	1001	1030	525	972	654	750	1876	896	428	428	423
CNAG_00488	1137	968	979	7562	14208	8776	1226	1157	1603	12573	12299	10591	1252	1393	1078	12447	7850	6536	1192	1377	1244	10356	10945	7735	1023	2524	1348	17929	10846	15655
CNAG_07952	265	328	266	473	664	437	370	231	446	466	436	495	384	451	274	516	487	409	280	553	389	363	418	444	271	705	317	583	349	514
CNAG_00490	4460	4782	4218	47010	84285	56412	4222	3783	7566	33236	31384	27007	5796	6630	6035	69060	49674	45890	4183	5499	4683	28689	35921	32798	4631	11293	5556	38927	33750	34521
CNAG_00491	4152	4421	3837	3835	6329	4117	3274	3912	5292	3522	3307	2541	4734	5986	5009	5123	3878	3513	4316	5316	4391	3115	3771	3243	3528	7859	4092	4392	3185	3945
CNAG_00492	323	317	259	383	470	345	302	291	389	593	391	512	372	372	335	465	323	234	306	406	303	237	210	403	190	605	313	519	463	444
CNAG_00493	8917	7635	7518	7877	10650	7365	11608	15388	10242	8741	5320	8055	10045	14852	9080	10750	8475	5789	8180	7745	8448	7296	7997	7278	7195	17664	8999	7709	6671	7316
CNAG_07364	2646	2760	2614	2821	4781	2989	2713	3067	3968	4014	3297	3724	3565	4032	3218	4115	2937	2315	2608	3243	3265	2923	2863	2960	2671	6837	3145	4712	3731	4255
CNAG_00495	1340	1393	1169	1810	2611	1889	1334	1230	1926	1875	1658	1383	1629	1995	1628	2492	1816	1323	1330	1546	1274	1436	1449	1372	1197	2723	1389	2209	1667	1814
CNAG_00496	3552	3651	3024	2022	3576	2370	3036	3124	4194	2782	2197	2275	4113	4902	3804	3120	2302	1839	3084	3870	3508	1704	2120	2228	2847	7075	3579	2706	2397	2598
CNAG_00497	15928	14345	14093	13579	26249	15200	12308	15028	18282	44642	32834	35147	19870	23286	18520	24511	14503	11047	12297	14556	15257	37400	37584	24818	12719	33823	15959	44137	32354	43855
CNAG_00498	12206	8651	9533	6059	9213	6193	9676	10535	11534	8047	5699	6620	11309	14985	11904	8767	6326	5208	7445	8939	8024	5029	5625	5066	7533	17517	9072	7348	7926	7213
CNAG_00499	3779	3434	3493	14434	21320	17449	2763	2428	4758	4980	4851	3377	4049	4244	4166	20334	11974	13280	3224	3555	3432	6616	9022	8766	3256	7493	3874	6510	6772	5095
CNAG_00500	9723	8374	8524	6122	11366	8280	6530	7087	10481	8208	6456	5516	11228	11025	10464	10999	6580	5919	7989	9006	9063	5995	6425	6485	7230	17839	8891	9872	7808	9664
CNAG_00501	651	509	652	287	379	287	693	503	781	303	230	244	638	874	617	316	301	266	549	582	521	106	192	265	444	1028	541	220	296	253
CNAG_00502	3106	3448	3030	2044	2538	1786	4811	3845	4026	1683	1110	1816	3708	6435	3320	2476	2261	1417	3117	3395	3208	1171	1391	1850	2636	6602	3066	1631	1503	1271
CNAG_12062	7	11	11	17	13	11	6	11	21	5	8	3	15	33	9	10	5	8	10	12	6	10	7	10	12	22	13	12	9	4
CNAG_00503	7113	7148	6624	14972	19292	12929	10703	8915	11999	12566	10475	11429	7901	10408	8034	17136	12659	12480	7591	9348	8118	8633	10830	8906	7587	17676	8780	12617	9870	11907
CNAG_00504	4084	4032	3603	3723	4933	3571	4922	4221	4970	3475	2219	2869	4229	5834	4012	4716	4211	2890	3657	4171	3906	2818	2896	2934	3491	8458	4185	3115	2665	2755
CNAG_00505	2767	2216	2261	5737	9685	6041	1923	2108	3075	4850	3913	3597	3080	3484	2975	8352	5800	4454	2435	2533	2378	4183	4702	3521	2021	4627	2306	5575	2921	4961
CNAG_00506	1689	1637	1462	2072	3129	1992	2402	2267	2073	2896	1537	2801	1761	2744	1659	2848	2428	1553	1444	1664	1896	1457	1741	2211	1497	4016	1714	2205	2318	1875
CNAG_00507	267	149	125	260	281	255	99	108	184	182	123	79	229	315	189	291	208	179	195	211	161	157	200	183	95	202	146	171	110	168
CNAG_00508	7758	6603	6322	7029	10788	7173	6953	7468	7471	7505	5067	6150	8595	10702	7796	10274	7006	5719	5922	6029	6199	6028	6581	6138	5106	13070	6714	6948	6144	6380
CNAG_00509	17944	17923	16470	8063	12014	8765	14688	13201	19743	7295	5736	4969	20112	23632	18669	11935	8570	6920	16096	17668	17165	6514	7284	7745	13071	31687	15714	8240	7197	6695
CNAG_00510	2306	3067	2220	1757	2575	1665	3297	2669	3343	1879	1317	1833	2742	4594	2484	2119	1917	1536	2612	3652	2860	1137	1350	1570	2180	5187	2430	1691	1447	1152
CNAG_00511	339	411	353	448	623	414	272	299	492	482	413	471	521	520	455	570	449	339	305	457	400	340	420	450	299	796	367	502	420	518
CNAG_00512	7354	6715	6331	4251	6234	4588	6269	5409	8099	2931	2343	2289	8086	9664	6769	6185	4215	3600	6495	6351	6758	3604	4244	3903	5002	11942	6443	3535	2994	2827
CNAG_00513	2696	3252	2515	4039	4701	4073	3598	2169	3750	2229	2070	1611	2702	3794	2739	5056	3605	2924	3397	3362	2946	3575	3758	4116	2073	5711	2532	3181	1954	2036
CNAG_00514	5092	4388	4538	4906	7722	5043	5772	5596	5722	5941	3752	5109	5380	7064	4923	7034	5457	4266	4243	4429	4639	3620	4380	4638	3799	9256	4583	5365	4783	5484
CNAG_00515	2673	2409	2362	2149	3604	2365	1743	2344	2852	1970	1742	1547	3265	3621	3309	3218	2135	1798	2181	2439	2403	1899	1970	1609	2019	4866	2542	2348	2204	2123
CNAG_00516	1297	1268	1208	2969	4948	3079	1076	1163	1859	2083	1829	1758	1405	1731	1383	4384	3136	2470	1389	1537	1109	1781	2238	2355	1140	2394	1150	2443	2296	2114
CNAG_00517	5319	5199	4534	5076	9795	6249	3582	3640	7870	3726	4786	2725	6402	6346	6200	7628	4424	5255	5805	7399	5580	3610	4525	4028	5079	10069	5823	5934	5139	4787
CNAG_07365	3879	4286	3658	2730	4487	3089	5043	5559	5146	5642	3662	4730	5098	6958	4340	4129	3498	2385	3628	4288	3773	2741	3011	3102	3240	7972	3854	5813	3851	5383
CNAG_00519	14218	12998	12313	2034	2708	2112	24839	31778	23315	1455	893	1103	16343	24817	13416	2910	2576	1976	17923	19267	18690	1281	1619	1262	12885	33613	16336	1111	1048	912
CNAG_07953	2264	2491	2251	2717	4280	2746	2184	1923	2769	2607	2228	2433	2692	3263	2456	3757	2913	2312	2388	2865	2538	2224	2491	2358	1995	4824	2236	2481	2195	2575
CNAG_00520	20206	18610	18047	8447	12845	9138	17566	17347	24572	10715	8138	8010	22852	24414	19802	13218	8320	6748	20166	19423	22591	8519	8732	9539	17550	45386	23033	11671	11274	11813
CNAG_00521	9598	9773	8857	10921	17361	10920	11086	13387	10632	23988	15596	20282	12115	17007	10914	15381	13037	7887	7785	8677	8874	14232	14475	13423	7711	19668	9759	21661	15923	21793
CNAG_00522	24161	24123	23041	18353	34784	20135	21512	26633	34044	102962	77797	74605	33610	34878	28446	33213	19464	13444	20186	24675	26128	69857	65895	43385	25135	63667	30388	108303	67778	107721
CNAG_00523	1837	1891	1811	1746	3172	2228	1875	1691	2357	2275	1516	2007	2194	2859	1979	2919	2130	1648	1630	1886	1993	1592	1824	1909	1546	3891	1893	2175	2037	1972
CNAG_00524	7239	6058	6556	13874	24519	16458	5175	5934	9343	13925	11797	9801	8840	8875	8612	20874	13679	12520	5895	6539	6763	11797	13153	11081	6290	14082	7702	16525	12745	15001
CNAG_00525	4219	4211	3966	2626	4057	2810	4615	4135	5856	2598	1967	1934	5185	5906	4677	3642	2603	2294	4046	4648	4582	1730	2221	2548	3674	9426	4748	2628	2894	2265
CNAG_00526	735	610	646	978	1506	1058	712	843	1192	1908	1802	1290	702	883	877	1249	878	814	671	820	661	1073	1222	969	648	1560	838	2597	1565	2156
CNAG_00527	8167	7855	7534	6090	8958	6497	6931	6303	8631	5837	4633	4560	9139	10566	8658	9326	6331	4934	7201	7398	7714	5531	5997	5937	6144	15297	7351	6828	5614	5879
CNAG_00528	3588	3605	3373	5982	9847	5845	3784	4433	5041	6566	4966	6004	4519	5827	4437	8546	6366	4983	3263	4231	3843	4995	5276	5124	3350	8534	3973	6524	6223	6179
CNAG_00529	1598	1940	1660	17383	33577	15500	2224	2230	2854	9421	7280	7930	2220	3003	2286	25926	19658	15531	1847	2254	1838	12802	12985	6772	1681	4138	2057	10263	6019	9174
CNAG_12063	71	102	65	155	200	172	214	201	262	236	145	231	67	165	105	185	168	107	135	142	96	110	117	222	148	315	133	172	200	198
CNAG_07954	313	364	318	375	814	528	802	924	1142	455	306	328	365	578	286	600	427	376	582	907	506	271	303	417	582	1301	609	355	432	343
CNAG_00531	7738	6973	7276	42077	75837	50769	3633	5679	7655	43920	46446	28357	10603	9475	9383	73909	39994	37400	6791	7300	7629	61259	63559	36328	5415	13624	6690	65011	38691	63003
CNAG_12064	211	284	233	290	545	444	416	318	515	817	683	619	301	380	237	408	325	353	270	443	227	339	486	552	264	655	310	822	674	668
CNAG_00532	2378	2867	2334	3715	5730	3961	2914	2217	4100	3153	2835	2615	2893	3528	2660	4907	3336	3616	3110	4137	2968	2233	3194	3201	2326	5142	2641	3618	3287	2986
CNAG_00533	9744	8726	9047	10257	17499	12176	7161	7125	10672	8330	6335	5918	10965	11900	10035	16206	11029	9318	8680	9242	9530	7255	8822	9046	7154	18405	9312	9167	8804	7948
CNAG_00534	14586	14821	13166	7536	13168	10213	13813	10578	20221	4722	4952	3938	16001	21198	16424	10491	7068	8098	17815	19941	16060	3946	5810	6259	14000	27163	15701	5399	5859	4676
CNAG_00535	5513	5263	5199	3695	5783	4133	3629	3424	6334	2962	2753	1595	6641	6074	5809	5386	3566	3089	5203	5596	5419	2899	3331	3042	4064	9888	5097	3800	3508	3263
CNAG_00536	9198	11031	8198	6354	9505	7355	7737	7272	13593	4351	4848	3315	10342	13173	10232	7627	6070	6344	10615	15168	10305	3591	4506	5571	8456	17242	9187	5570	5563	4146
CNAG_10014	1	0	0	8	15	5	0	0	4	2	3	1	0	3	0	10	4	4	1	3	1	1	2	3	1	0	0	7	1	1
CNAG_00537	5123	4689	4310	25630	35918	31908	6401	5696	8129	13020	10916	10731	5383	6729	5792	33554	24645	24174	4139	4673	4591	18039	25998	20563	4460	12478	6157	13763	14078	9819
CNAG_00538	3108	3590	2804	1908	3082	2269	3913	2685	4503	1527	1518	1520	3653	5485	3578	2596	1881	2021	3555	4875	3601	1136	1596	1690	2972	5848	3202	1771	1737	1383
CNAG_00539	6552	7085	5293	32292	44480	34456	7710	20493	10874	16729	20329	11265	6465	7751	6030	47348	28018	24276	11116	10214	9299	43716	45589	17799	7011	16533	8455	22244	8406	21237
CNAG_12065	107	129	75	506	585	471	363	355	256	461	453	466	94	147	107	502	537	341	152	160	125	501	482	442	88	185	102	446	273	389
CNAG_12066	85	104	50	186	355	245	182	331	204	316	264	298	79	180	75	247	248	181	177	148	109	220	244	197	87	235	122	311	198	223
CNAG_12067	453	526	447	762	1174	827	703	787	1074	872	923	827	644	908	725	1050	814	680	697	1085	732	644	791	875	749	1613	621	932	915	856
CNAG_00540	77	76	57	76	138	59	102	164	210	280	203	231	92	118	82	117	90	57	97	103	103	133	175	179	147	339	195	266	223	179
CNAG_12068	29	28	33	44	51	38	44	21	29	62	43	54	42	73	32	50	38	43	34	38	33	31	70	68	24	35	28	61	51	60
CNAG_00541	988	1085	1065	1090	1670	1235	638	601	869	1567	1128	929	1468	1685	1157	1485	1150	927	693	911	947	1121	1065	1140	604	1447	776	1416	1110	1509
CNAG_00542	1017	1257	1026	5112	9376	5952	1189	1740	1536	9681	7275	8089	1533	1984	1574	7864	5634	4577	1199	1515	1189	4880	5996	6204	853	2523	1230	9448	8210	8291
CNAG_00543	6437	7060	6561	12605	21644	14084	4297	5811	6625	8339	7000	6586	9097	10319	8619	18580	12913	10957	6087	7307	6602	7898	9152	9566	4551	11950	5949	9171	8951	7677
CNAG_00544	1041	1114	835	1366	1988	1433	1123	1206	1550	2285	1837	1592	1117	1429	1092	1979	1431	1070	1149	1146	1008	1534	1608	1573	913	2106	971	2487	1886	2279
CNAG_00545	9415	8698	8288	5537	8742	6048	9478	9719	10683	6548	4621	5680	11103	13961	9951	8679	5893	4939	7817	8976	9456	4184	5050	5350	7462	20174	9872	6438	6226	6377
CNAG_00546	22113	15931	17181	26529	40424	29654	17275	19075	22021	20683	18210	16226	21548	25078	21784	41106	27351	21644	15068	16418	15286	30052	29081	28002	14006	34125	17319	26294	20245	20886
CNAG_00547	31641	25756	26966	97645	163026	111073	20626	22744	22291	70702	49157	59901	34016	41915	32569	155355	109699	82130	16535	19004	18905	86897	103200	109698	15766	38001	19094	69596	83678	56308
CNAG_07955	3358	2757	2673	9306	15688	11086	2932	2896	3958	7919	6731	6751	4019	4952	3896	14268	10129	8529	2956	3791	2984	8107	9442	8883	2053	5005	2592	7375	6624	6041
CNAG_00549	731	808	775	4376	6740	5296	716	766	1194	4883	4331	3433	1119	1327	1073	7173	4924	3361	684	1085	810	4582	4704	4541	1009	2019	1052	7778	3990	6012
CNAG_00550	1791	1426	1387	2502	3536	2412	3084	2711	3760	4584	3830	3418	1742	2987	2004	3141	2803	2026	2265	3132	2414	3226	3587	3427	2738	6639	2927	5160	4096	4335
CNAG_00551	17002	15394	14732	13238	20742	14948	15140	14283	18484	14133	10380	10661	18565	22345	17017	19967	14440	11608	13945	15025	15780	10424	12432	13054	12286	31707	15687	14745	12948	13193
CNAG_12069	288	236	287	561	729	596	286	162	290	469	388	421	284	301	313	685	486	517	253	255	164	395	461	371	166	358	167	560	399	363
CNAG_07367	21	18	41	11848	14184	10138	85	32	63	593	444	436	34	57	44	13254	12061	12012	52	75	48	1501	2512	1297	72	136	52	690	862	506
CNAG_12070	128	104	128	439	762	600	120	131	217	201	180	166	137	150	150	645	460	486	132	135	84	187	202	219	105	238	127	232	234	206
CNAG_12071	27	11	12	116	159	109	25	9	27	30	25	35	26	22	17	133	110	68	15	25	12	27	40	28	19	25	23	31	31	33
CNAG_07368	9540	9319	9097	7240	13224	8789	8655	9150	12415	11154	9491	7706	12117	13266	10752	12199	8177	7049	8789	10292	10314	7397	8524	8563	8160	20595	10223	12878	11200	12259
CNAG_12072	1399	1411	1427	1109	2063	1500	1391	1462	1985	3254	3014	2684	2022	2026	1781	1852	1316	1029	1361	1719	1483	1552	1674	1626	1403	3109	1553	3823	2612	3493
CNAG_00554	5921	5707	5477	4289	8008	5041	5322	6665	7516	8639	6579	6804	8121	9232	6965	7149	5292	3846	5208	5792	6212	6424	6469	5710	4939	12340	6487	9066	7304	9036
CNAG_12073	0	0	0	0	0	0	0	0	0	0	0	0	0	0	0	0	0	0	0	0	0	0	0	0	0	0	0	0	0	0
CNAG_00555	2676	2554	2549	1544	2754	1924	2202	2003	3417	1899	2099	1361	3179	3560	2866	2300	1564	1722	2649	2887	2347	1952	2088	1638	1958	4687	2477	2677	1784	2228
CNAG_00556	15587	13430	13137	11473	17383	11779	15258	15120	17629	11263	8453	9890	16408	21792	15164	15856	12174	9815	12738	14514	14571	8304	10144	10201	11606	27985	14132	12165	11144	10940
CNAG_00557	4716	4439	4291	3328	4707	3437	4424	4070	5310	3828	2911	3058	5405	6696	5110	4423	3252	2616	4175	5079	4584	2604	2972	3283	3545	8486	4410	4032	3532	3656
CNAG_00558	13001	11268	11435	12317	18500	12570	13677	13146	14458	9497	6775	7295	14508	18323	13057	17943	13535	9585	10579	11857	12040	9089	10279	10510	10259	25845	12629	10210	9038	8741
CNAG_12074	90	185	60	434	571	407	376	325	248	783	748	548	127	233	100	513	392	448	221	192	155	440	523	279	139	323	147	583	282	564
CNAG_00559	10886	13171	9609	35783	61186	41401	19003	19229	12909	28267	20253	24077	13279	21223	11517	53441	45556	35065	11528	10501	9912	44359	52633	27059	9090	21894	10401	25474	12985	23914
CNAG_00560	14741	16369	13795	9694	18414	12295	14287	13023	22829	9646	9497	8282	19122	24223	19172	13955	9841	10437	15783	23414	16605	8523	10340	9890	14539	32286	16455	12415	10154	10065
CNAG_00561	6275	6466	5235	4172	7379	5011	6012	5649	8796	4000	3412	3531	7121	8710	7520	6215	4180	4120	6341	8346	7006	3479	4054	3983	5708	13425	6744	4556	4059	3872
CNAG_00562	5002	4934	4476	3059	4628	3596	4803	4012	6686	2529	2279	1778	5921	6833	5481	4142	2892	2587	5082	6394	5651	2223	2500	2560	4565	10841	5592	3062	2502	2621
CNAG_00563	3216	3803	2914	2593	4667	2928	4554	4113	4960	5979	5083	4953	4061	5643	3992	3959	2767	2196	3339	4849	4115	3930	4201	3441	3766	8766	4273	6398	3871	6017
CNAG_00564	9685	9637	8599	5156	8207	4861	14874	14100	13709	11258	7242	9072	11323	15806	9887	7617	5817	3869	8917	10660	10332	6902	7013	5512	9432	24001	11824	10548	6403	9880
CNAG_00565	39089	32197	33047	19198	34765	24968	26149	27865	41235	13202	11956	10026	44971	44242	41067	32219	20244	18743	31404	34896	35426	15325	17853	16518	27516	69130	35489	16531	16830	14506
CNAG_00566	5301	5246	4943	4362	7459	4960	4300	4953	6704	9821	8350	7361	6680	6849	5961	6622	4381	3609	4370	5512	5473	6493	7470	6007	4859	12164	5965	11086	8616	10715
CNAG_00567	3108	3525	3091	3061	5348	3524	4533	3425	6159	3097	2849	2596	3872	5089	3906	4239	3358	2980	4237	5699	4326	2612	3067	3113	3667	8547	4298	3552	2978	3005
CNAG_00568	892	1007	938	5016	8617	6389	1256	1547	1688	6004	5170	5677	1165	1675	1262	7247	5761	4647	1266	1405	1004	3283	4835	4919	976	2146	1113	5887	5723	4984
CNAG_00569	5808	6121	5167	7361	11228	7452	6066	5396	6853	8844	6876	7041	6755	8466	6194	10357	7898	6122	5883	6329	6103	6829	7585	6556	4819	11742	5603	10369	6628	9280
CNAG_00570	16543	16274	15461	9974	16127	10994	12818	13496	18567	13863	11086	10500	21135	23326	18618	15324	10319	8589	14546	17311	17089	8253	9486	9478	12196	30325	14815	16153	12241	15371
CNAG_00571	3089	2778	2637	2488	4309	2756	3301	3076	3552	2367	1670	1975	3373	4617	3285	3751	2846	2354	2414	2878	3012	2058	2371	2110	2275	6168	3175	2451	2084	2209
CNAG_12075	65	27	37	50	61	47	29	36	55	31	46	26	54	57	31	63	55	31	24	42	21	32	65	39	26	62	31	56	39	42
CNAG_12076	0	0	0	0	0	0	0	0	0	0	0	0	0	0	0	0	0	0	0	0	0	0	0	0	0	0	0	0	0	0
CNAG_00572	9937	8979	8805	6797	10806	7549	7709	8880	10859	5962	4977	4643	12881	13860	12052	9478	6716	5797	7662	9509	8526	5830	6129	5549	6995	18110	8869	7437	5388	6011
CNAG_12077	29	17	21	44	35	29	23	30	28	53	29	18	26	34	21	28	10	14	16	7	12	11	14	17	27	57	44	29	21	22
CNAG_00573	8060	7479	6929	6115	9371	6300	9125	8009	8844	6672	4675	6129	8377	12272	7805	8360	6371	5243	6735	7678	7312	4078	5100	6223	5954	14212	6849	6029	5750	5178
CNAG_00574	5548	5231	5135	6149	9622	6587	5243	5138	7301	5821	5291	4564	6656	7864	5917	8906	5916	5380	4871	6023	5326	5040	5874	5687	4912	11803	5955	7700	6293	6366
CNAG_00575	14263	15953	14054	10395	19946	15116	6515	8087	12085	87560	68025	59488	23576	22867	18285	19754	10388	8795	8259	10526	11223	59116	51549	31046	8754	22197	10641	96928	46180	96818
CNAG_00576	8665	7596	7160	4308	6529	4502	9186	8324	9311	3180	2362	2614	8905	12224	8714	5818	4504	3691	7554	8352	7470	3646	3972	3870	5960	15072	7643	3570	2752	2776
CNAG_00577	1773	1883	1677	2654	3931	2497	1863	1871	2374	2577	1911	2034	2240	2835	2004	3605	2536	2061	1954	1971	2024	2371	2564	2130	1549	3731	1781	2840	2034	2476
CNAG_07369	126	185	112	407	636	490	123	197	192	457	424	388	170	275	159	551	324	382	154	201	165	390	385	325	135	324	112	544	413	415
CNAG_00580	7373	7332	6330	6087	8784	6497	7727	5747	8753	7052	5794	5628	7808	9900	7381	8429	6289	4784	6302	8101	7055	5966	5965	7168	5296	13586	6943	8775	6124	6935
CNAG_00581	68763	57763	61475	83422	157998	102115	33493	53992	87087	70410	80201	47891	93273	81144	88383	137700	80474	80927	63968	75250	69142	92837	104580	79435	59467	134991	70746	106070	84016	92670
CNAG_10015	0	0	0	0	0	0	0	0	0	0	0	0	0	0	0	0	0	0	0	0	0	0	0	0	0	0	0	0	0	0
CNAG_00582	5675	6107	5015	4849	7403	5208	4205	3856	6669	6040	5953	4855	6706	7759	6470	6472	4853	4257	5489	7044	5960	5988	5994	5859	4438	10432	5169	8316	5681	6808
CNAG_00583	33094	30425	29220	19079	30247	20802	36832	43011	40135	20900	13560	18198	39508	51819	36741	29071	22133	15563	28546	33722	34984	14882	17415	18411	29405	76254	35775	17642	19658	16339
CNAG_00584	37579	42422	34969	28832	48265	34460	34976	35831	57849	30674	29969	25673	50133	63044	48919	38690	30613	27956	40621	57056	41490	22540	27902	30105	36990	82574	39040	33630	32237	28931
CNAG_00585	1053	1318	1043	890	862	818	1277	1118	1414	704	587	441	1303	1795	1130	895	906	557	981	1315	1141	957	733	1203	939	2319	943	898	522	539
CNAG_00586	74843	88850	71169	8093	13382	8328	94078	154156	163405	41090	29945	32048	133136	184876	135820	11316	8474	6696	103195	173976	126038	16758	17759	15714	112216	276423	116544	31542	33033	26068
CNAG_00587	18784	12292	12206	3360	3485	2876	43640	84738	75896	35301	26650	31952	19355	26333	21534	3317	2915	2341	40771	50360	45994	8150	8187	11239	52256	129194	60973	24391	46707	19238
CNAG_00588	211648	209665	202750	625744	1081890	605122	125420	304111	281204	3212498	2604147	2447154	395784	388261	349559	898888	656473	436164	214445	256930	289695	1502277	1468156	1371555	224121	619443	280992	3114339	3087382	2785224
CNAG_12078	1328	1673	1504	2324	3492	2713	632	778	1000	3554	3377	2573	2456	2732	2440	2785	2123	1892	1207	1826	1363	2616	3311	3333	712	1681	784	3529	4138	2495
CNAG_00589	5382	5367	5153	3148	5135	3842	4747	5064	6225	4507	3563	3537	6353	8275	6143	5005	3309	2683	4904	5313	5478	3165	3560	3809	4012	10369	5113	4777	4616	4251
CNAG_00590	5924	5456	5110	3511	5321	3842	4977	4735	5829	3503	2762	2736	6401	7744	6243	5373	3576	2898	4992	5391	5481	3183	3240	3624	4043	9888	4684	4145	3094	3344
CNAG_00591	191	274	186	708	852	612	241	236	216	824	627	862	261	387	274	711	624	508	209	176	193	626	680	689	216	400	202	672	393	676
CNAG_12079	433	476	439	653	854	755	534	539	472	933	658	1134	534	899	497	839	728	537	413	527	429	511	669	793	335	821	405	904	582	699
CNAG_00592	1668	1644	1490	1850	3481	2407	1587	1761	2305	1419	1199	1084	1969	2036	1835	3012	2005	1772	1641	1737	1690	1262	1518	1608	1452	3453	1917	1799	1632	1509
CNAG_00593	3287	2893	2852	2784	4405	3064	2696	3186	3835	3726	2624	3033	3552	4663	3596	4548	2747	2098	2731	2922	2681	2415	2665	2720	2316	5569	3091	3879	2957	3586
CNAG_00594	11211	9258	9292	12354	17865	12406	11723	10272	11505	12139	8694	9084	10970	13966	10085	18060	12919	9629	8173	8877	8448	13238	14379	13538	7396	18944	9278	13717	10726	11357
CNAG_00595	2277	2492	2249	1821	3300	2290	2391	2554	3290	6542	5484	5531	3146	3893	2873	2912	2254	1644	2113	2916	2605	3877	3608	3122	2525	5654	2934	7321	4549	6832
CNAG_00596	1495	1254	1195	1437	2182	1659	1134	1246	1806	2215	1829	1817	1955	2163	2046	2022	1416	1239	1198	1743	1422	1298	1686	1251	1176	2933	1463	2225	1874	1742
CNAG_12080	88	106	119	371	437	359	241	392	500	2257	2175	2050	130	240	131	370	299	308	248	324	242	431	619	1039	285	589	278	2415	1947	2211
CNAG_00597	281	313	236	4639	4949	4463	535	554	578	6779	4795	7244	298	458	358	4180	4266	3910	301	462	372	2343	3121	5580	362	941	403	5766	9674	5141
CNAG_12081	23	22	12	134	169	146	12	8	10	230	233	142	28	30	21	129	88	95	14	12	9	133	141	156	15	37	5	221	232	210
CNAG_00598	247	188	153	5229	8647	6321	125	117	288	6933	7145	5879	274	252	224	7491	5037	5010	225	306	264	4033	5179	5283	163	375	229	9703	9944	9802
CNAG_00599	4444	3918	3668	5095	7874	5711	4025	3961	5606	5525	4609	4574	4458	5439	4316	7126	5201	4535	3623	4070	3908	4812	4967	5050	3278	7924	4131	6438	5046	5475
CNAG_00600	10227	8819	8582	5609	8140	5917	8614	8022	12562	4229	3228	3019	11170	12044	9878	8159	5375	4715	8487	9518	9394	3885	4618	4772	7723	20500	10360	5041	4552	4055
CNAG_00601	492	402	381	1206	1362	1079	265	150	338	790	726	616	450	633	502	1367	952	761	244	288	282	564	604	723	255	433	276	809	779	816
CNAG_12082	220	271	202	608	714	530	178	163	280	577	407	401	292	329	276	770	628	365	222	253	242	439	620	457	144	461	215	465	363	413
CNAG_00602	5072	4837	4304	2981	4706	3488	4033	3171	5698	2005	1926	1446	5361	5561	4199	4572	3279	2847	4330	4652	4708	2612	2780	2829	3748	9073	4706	2883	2175	2309
CNAG_00603	3146	4083	3180	6250	7205	5765	3831	3104	4130	3150	2711	2230	3805	4903	3517	7476	5794	4216	3914	3694	3473	5303	5415	5386	2569	6248	2993	4424	2590	2956
CNAG_00604	4462	4406	4089	3364	5101	3666	4617	5382	5120	3505	2812	3453	5370	7010	4941	4734	3839	2522	3843	4241	4352	3060	3141	3386	3488	8801	4072	3967	3224	3328
CNAG_00605	8025	8916	8246	3300	5922	4057	5554	7353	8494	13489	10103	9283	11758	13954	10475	6063	3536	2746	6732	7756	7823	8254	7599	4692	6287	15809	7942	15696	6852	14953
CNAG_12083	1898	2180	1610	12101	21758	14560	2419	2554	3279	13820	12295	10859	2394	3189	2434	17604	12670	11262	2254	3200	2240	8994	10653	11488	2109	5041	2388	13820	12467	11576
CNAG_00606	4749	4559	4429	4982	8166	5111	4915	4517	5731	5722	4144	4956	5801	7009	5192	7272	5507	4433	4150	4875	5148	4787	5079	4854	3834	9876	4878	5443	4901	5492
CNAG_00607	2418	2670	2215	4211	4712	3977	2786	2198	2760	2712	2115	2051	2598	3475	2309	5554	4002	2523	2362	2334	2341	3359	3876	4207	1663	4549	2083	3627	2412	2225
CNAG_00608	3135	3720	3000	1538	2255	1712	3524	2427	3989	1120	914	686	3312	4352	3462	2155	1653	1246	3318	4035	3621	1105	1194	1498	2376	6289	3001	1431	935	985
CNAG_00609	5659	6002	5354	3337	4565	3997	4563	4705	6610	3688	3281	2405	7063	7508	6112	5146	3126	2699	5519	5804	5702	4661	4690	4979	4185	10285	5167	5426	3133	4335
CNAG_07370	350	380	334	331	513	407	328	348	464	392	357	560	417	629	418	429	338	331	475	507	353	237	341	293	295	741	356	606	371	426
CNAG_07956	7464	6722	6236	5200	8082	5618	5998	6117	7900	4831	3623	3681	8378	9588	7379	7853	5500	4534	5929	6337	6869	4529	5026	4407	5651	13721	6934	5047	4639	4602
CNAG_07957	3870	3826	3370	3080	3976	2926	4303	3640	5025	3484	2719	2643	4003	5168	4053	4061	3168	2294	3612	3961	3787	2979	2862	3416	2984	7466	3830	4154	2874	3250
CNAG_00612	3389	3167	3181	2914	4265	2971	2955	3177	4644	3697	2869	2888	4081	4359	3731	4138	2733	2363	2909	3198	3488	3068	3296	3077	3006	7673	3638	4175	3463	3642
CNAG_00613	1684	1974	1600	1250	1877	1501	1990	1533	2631	1812	1223	1172	1766	2348	1746	1878	1511	1193	1965	2447	1903	1110	1201	1449	1525	3557	1851	1772	1148	1435
CNAG_00615	1173	1105	1088	725	1108	932	1140	1267	1535	1341	886	987	1433	1814	1295	1189	834	629	988	1183	1121	592	726	743	859	2398	1113	1406	1073	1289
CNAG_00614	0	0	0	0	0	0	0	0	0	0	0	0	0	0	0	0	0	0	0	0	0	0	0	0	0	0	0	0	0	0
CNAG_07372	7390	6548	6540	4474	7180	4999	5672	6488	8791	6051	4819	4913	8318	8908	7252	7154	4833	4251	6613	6929	7075	4122	4502	4865	6430	14485	7409	7136	6089	6790
CNAG_00619	2187	1970	2202	2155	3294	1984	2150	2096	2670	2087	1600	1685	2732	3385	2423	3056	1974	1695	1842	2222	2129	1449	1946	2045	1689	4106	1965	2075	2067	1911
CNAG_07373	99969	82707	83224	16584	22924	19054	81465	69547	113861	14324	13304	9252	90772	102171	81249	25643	15260	15092	88080	84537	88624	13648	14042	16420	72093	184727	96254	24033	12384	19011
CNAG_07374	1574	1852	1486	2252	2675	2341	1978	1498	1847	1914	1382	1416	1763	2507	1567	3062	2330	1460	1561	1615	1530	1862	2018	2021	1180	3070	1392	2063	1374	1545
CNAG_00622	11604	11562	10684	5319	8062	5572	8402	8411	11192	3411	2710	2329	12985	14702	11695	7655	5207	4202	9694	10495	10787	3640	4135	4630	7258	18648	9463	3777	3979	3102
CNAG_00623	4635	4231	4348	4947	8735	5992	4121	4366	5981	4928	3806	3842	5807	5927	5122	8128	5086	4351	4292	4829	5011	4337	4870	5138	4154	10364	5252	5335	5686	5055
CNAG_12084	54	46	24	72	123	61	85	66	95	105	91	96	41	68	42	62	65	66	43	68	28	38	47	63	41	91	41	123	75	79
CNAG_00624	5576	6407	5410	4623	8177	5290	5499	5416	8684	4010	3648	3031	7009	9338	7372	6337	4563	4045	6394	8839	6637	3701	4301	4205	5296	12843	6291	4946	4078	4006
CNAG_00625	17092	16536	15540	11932	19061	13106	21074	22173	23527	29849	19350	23233	21370	26814	19122	18947	13754	10442	15208	19061	19136	13705	15880	15322	16286	42166	20187	27882	21749	28928
CNAG_00626	33994	37238	32665	21234	36870	23390	33383	34571	40979	50704	36469	39970	42728	55003	39540	33055	23161	17077	29382	36119	36191	32001	33266	31952	28867	72141	34371	48942	38426	44071
CNAG_00627	837	923	846	2282	3304	2304	1207	1178	1257	7524	4474	6924	1006	1444	936	3075	2581	1581	793	955	880	2972	3698	3629	738	2188	1009	5891	4930	5164
CNAG_00628	1579	1660	1424	3033	4652	3124	2204	1555	2156	2244	1766	2033	1669	2530	1568	4000	3138	2449	1685	2121	1725	1985	2319	2546	1504	3382	1525	2157	2076	1918
CNAG_07375	12468	11930	11555	11059	17989	11622	11662	13261	13848	13462	9640	11308	14945	17668	13499	16357	12601	9217	10022	11230	11659	10181	11241	10735	9672	25291	12392	12935	11265	12824
CNAG_07376	6099	6060	5654	4517	6370	4408	6351	5791	6919	4992	3537	4115	6837	8866	6497	5863	4847	3490	5418	5680	6126	3604	4017	4868	4852	11250	5290	4993	4415	4014
CNAG_12085	0	4	3	15	13	22	15	7	2	21	1	3	3	7	0	13	11	6	12	12	2	4	5	14	8	6	4	18	16	5
CNAG_07377	23395	18977	20330	21059	34199	24937	18863	20729	26357	16498	13970	13270	26087	27573	22302	32628	20547	18299	20615	20187	21621	14188	18418	16850	18458	47249	23619	18818	18100	18697
CNAG_00632	12221	10842	10120	7592	11526	8143	9253	8887	14514	4260	4209	2900	12081	15207	12980	9009	6860	6965	11732	13137	10894	4451	4947	4951	9444	20924	10835	5122	4916	3745
CNAG_00633	7906	6927	6866	5655	9228	6486	6820	6327	9202	6355	5271	5071	8481	9898	7823	9179	5797	4802	7032	7763	7755	5224	5711	6677	5974	15572	7599	7989	6466	6561
CNAG_00634	9733	9105	8409	8916	13612	9148	10853	10609	10454	8613	5238	7113	10942	14740	10209	12831	10092	7213	7929	8272	8734	6685	7623	7372	6995	18230	8961	8201	6936	7154
CNAG_00635	25530	22684	22663	22814	38102	26373	29140	30391	33264	36214	22952	29814	29906	39295	27067	37103	27258	20157	22264	25594	26013	21148	25315	27331	22291	58582	28085	32121	33109	31779
CNAG_00636	4630	4034	3793	3146	4150	3015	4661	3500	5439	2067	1592	1764	4440	5817	4495	3860	2829	2786	3615	4303	4100	1627	2157	2102	3521	8264	3885	2141	2125	1987
CNAG_00637	3267	2690	3058	28741	46839	30246	1219	2759	2921	13623	13317	11786	4378	4838	4531	40083	27220	25353	2169	2469	2520	19317	21801	15514	2104	4753	2485	17633	13373	14945
CNAG_00638	4793	5553	4739	8092	14994	9112	3765	4538	4511	25259	17494	20559	6109	7643	5832	12881	8424	6222	3133	4300	4439	18767	16916	12111	3815	9471	4564	25909	14337	24838
CNAG_00639	3828	4344	3363	3891	6275	4253	4216	4595	4907	3070	2739	2684	4611	6659	4715	5331	4655	3276	3669	5226	3815	3322	3289	3858	3082	7522	3518	3516	2652	2367
CNAG_00640	153638	153436	135621	22282	33123	26210	105583	69874	158796	10672	10432	7325	158921	171035	152291	32059	21250	20446	136498	156581	149006	13550	17203	17424	100545	236004	123719	14266	12274	10898
CNAG_00641	13754	13467	12541	11538	19064	12576	14251	14121	15613	11556	7911	9342	15280	18969	13691	18016	13341	10000	11631	12800	13564	8920	10276	11777	10896	28135	13189	11852	10738	10871
CNAG_07958	739	925	673	558	830	552	1127	748	1361	693	605	700	896	1422	805	744	630	488	960	1316	1004	436	496	517	774	1836	851	748	631	635
CNAG_00642	6377	5351	5283	7733	11142	8133	9206	8506	8621	11055	7262	8684	6582	8773	5679	11173	8438	6587	6116	6353	6442	6921	7765	7480	5824	15106	7326	9495	9110	9932
CNAG_12086	95	100	105	200	243	176	257	198	155	679	448	862	131	196	84	278	271	136	123	113	106	178	205	191	111	313	121	440	393	417
CNAG_00643	2698	2732	2366	4448	5374	3961	2590	1844	2971	2837	2384	1971	2711	3309	2567	5549	4189	2771	2517	2641	2396	4291	4137	4541	1693	4487	2310	3711	2500	2724
CNAG_00644	7233	6582	6539	5250	8398	5915	8066	9006	9283	10587	7016	8408	8958	11872	8362	8363	5961	4406	6209	7436	7310	5014	5818	6992	6340	15835	7917	9798	8978	9151
CNAG_00645	3659	3201	3033	2377	4012	2725	2940	3126	4160	3796	2870	2792	4083	5276	3957	3698	2658	2103	3126	3585	3367	2200	2376	2973	2561	6532	3663	3942	3546	3346
CNAG_07959	4091	3769	3549	5133	7990	5478	4291	4365	4354	5140	3877	4250	3969	5136	3674	7606	5669	4224	3464	3698	3472	5347	5926	5846	2653	5913	3336	5436	5162	5046
CNAG_00647	3894	4051	3708	6768	9041	6061	3624	4081	3809	3131	2556	2306	4677	6660	4910	8325	7333	4928	3745	3683	3446	4337	4373	4123	2621	6414	3037	3647	2455	2768
CNAG_00648	6634	7480	6190	9185	15203	9129	5756	7615	7241	11457	9054	9689	8495	11003	8627	12242	10129	7645	5845	7145	6177	10031	10484	8753	5219	12825	5860	11292	8530	9752
CNAG_00649	28884	26809	25818	8545	13879	10137	20246	19504	28189	5979	5188	4040	31659	34098	27470	13001	8491	7680	24975	25471	27666	6128	7028	6925	19360	48558	24889	6956	6178	6135
CNAG_00650	7728	7454	7378	5337	8514	5662	6767	7628	7905	4656	3619	3821	9302	11776	8474	8483	6082	4565	6264	7220	7345	4230	5029	4554	5467	13666	6916	5122	4538	4765
CNAG_00651	2811	2440	2702	18509	32139	20604	2578	3539	4142	15648	12630	13746	3916	4233	3511	28527	19951	16544	2442	3127	3014	12737	16115	15395	2714	7196	3337	15467	17561	14410
CNAG_00652	8541	7268	6777	6843	10149	6957	7781	8408	8463	6864	5560	6533	9138	12329	8966	8159	6497	5343	7031	8869	7459	7592	8485	7721	6121	13132	6571	6568	6720	5031
CNAG_00653	4965	3267	3455	2628	2766	2470	3788	3815	4323	2572	1953	2422	3887	5645	3994	2708	2400	2082	3122	3249	2795	1654	2180	2516	2719	6168	3049	2162	2957	1897
CNAG_00654	1262	1507	1221	1714	2132	1668	1529	1477	1728	1927	1888	1365	1385	1663	1161	2033	1541	979	1343	1213	1348	4225	3086	2546	1250	2549	1394	3018	1142	2093
CNAG_00655	52805	57171	46437	8574	13613	11629	33376	23184	63490	4063	5030	2734	51325	57107	49778	12223	8586	9188	58153	67269	53214	5213	6780	6343	41727	82850	48036	6009	4911	4514
CNAG_00656	97877	98255	87895	17840	25830	21160	71074	48890	96564	10753	9407	6909	102029	112380	95118	26269	16948	15633	84117	90098	87775	11129	13874	14563	63077	148873	76901	13696	10777	10243
CNAG_00657	0	0	0	0	0	0	0	0	0	0	0	0	0	0	0	0	0	0	0	0	0	0	0	0	0	0	0	0	0	0
CNAG_00658	3144	2856	2845	2244	3654	2496	2727	2847	3421	2619	2028	2266	3937	4413	3645	3315	2364	1899	2753	2865	3067	1840	2062	2376	2511	6133	3307	2813	2656	2701
CNAG_00659	903	973	850	957	1322	913	875	811	913	997	681	757	1008	1437	1073	1106	930	642	745	828	889	664	738	814	658	1799	722	890	657	747
CNAG_00660	2213	1826	1810	1964	3203	2150	2453	2019	2343	3134	2007	2377	2082	2781	1852	2777	2227	1616	1641	1965	2084	1629	1845	2080	1554	3772	2060	2963	2407	3034
CNAG_00661	2514	1946	1998	1705	2568	1853	3822	2444	2790	2721	1514	2169	2139	2849	1755	2582	1969	1549	2193	2114	2261	1393	1549	1640	1872	5029	2564	2365	2080	2370
CNAG_00662	7317	7167	6762	8246	14560	9780	4976	5617	10150	6383	6402	4710	9272	8615	8318	12627	7961	7659	7456	8865	8166	6632	8108	7894	6421	15001	8108	8572	8295	7551
CNAG_00663	11595	11957	10873	12165	17522	11830	6949	8543	9287	8550	7101	6720	14674	18199	14512	15773	12496	10059	9254	11913	10455	9345	10443	9245	6405	14970	7119	10685	6322	8418
CNAG_00664	253	276	232	243	309	256	146	147	201	196	132	98	351	411	291	304	236	205	267	264	211	140	165	178	190	407	143	206	134	171
CNAG_00665	14685	12839	13131	8443	14091	9483	10252	10921	15683	10912	8791	7281	17203	17236	14775	13152	8332	7245	12625	13182	13649	8208	9208	8634	10866	26998	13273	12628	10856	12908
CNAG_00666	15839	14318	13840	12436	19458	13830	16452	15507	17481	15896	11243	12380	18162	21491	15107	19208	14029	10727	13841	14215	14801	12323	13555	13548	12010	31245	15268	15973	13578	15636
CNAG_00667	4729	4880	4400	2640	3425	2452	5509	4831	4986	4844	3146	4159	5824	8599	5361	3275	2904	2029	3807	4756	4557	2234	2432	2889	3547	8478	3910	4576	3344	4219
CNAG_00668	37436	34819	32634	53359	96497	67895	34454	41892	50871	99975	78525	75759	46064	51203	42532	93169	59873	47071	34703	37620	38215	62850	72136	69927	33190	82394	41051	105720	94449	98424
CNAG_00669	2507	2679	2445	2058	3559	2661	2353	1863	3252	1263	1523	1048	2959	3534	2950	3198	2046	2045	3024	3531	2803	2216	2338	2120	1973	4723	2503	2111	1375	1413
CNAG_00670	2058	1941	1911	1318	1244	1174	2976	2242	2548	813	506	680	2064	3017	1841	1488	1274	866	1470	2119	1824	717	824	1139	1586	4141	1855	787	762	665
CNAG_00671	7903	7672	7120	5162	9117	5561	6956	7238	8741	8599	6363	6903	9135	10821	8345	8698	5753	4143	6357	7602	7657	6669	6930	5788	6274	15612	7703	9315	7586	8863
CNAG_00672	62874	83843	66669	12488	19775	15767	66354	41548	88725	7767	7967	5619	74791	104198	78563	16983	11984	12397	77355	104375	77043	7963	10329	11255	56776	130031	64151	10464	7213	7680
CNAG_00673	6956	7376	6204	5512	8641	6197	7318	7283	9033	5798	4377	4486	8005	10653	8157	7494	5881	4494	6687	8079	6942	4375	4789	4827	5933	14881	6840	6051	5340	5259
CNAG_00674	10894	9592	9771	10132	11338	8625	4817	5466	4834	11002	7560	8959	12692	16704	11756	12129	9871	6781	5948	8092	8030	10404	11364	12026	3874	9356	4521	11113	7870	9817
CNAG_00675	3362	3595	3305	3687	5416	3759	4083	3337	4618	2361	1957	2052	4037	5497	3859	4981	3532	2960	3318	4498	3952	3237	3467	3458	2973	7318	3466	2518	2358	2271
CNAG_00676	3237	3836	3002	2697	5494	3191	3757	3479	5018	3582	3066	3484	4029	6210	3929	3913	2988	2508	3414	5502	3712	2731	3044	2933	2972	7344	3211	3870	3486	3231
CNAG_12087	2151	1765	1818	1440	1801	1419	1445	1384	2716	1413	1347	895	2328	2549	2539	2191	1381	1265	2026	2235	1869	1034	1141	977	1608	3451	1909	1904	1367	1738
CNAG_00677	2360	1950	1862	831	760	877	3796	1726	3543	617	506	562	1834	2752	1906	653	692	984	2439	3161	1880	253	367	320	1929	4135	2154	643	650	511
CNAG_00678	12888	12500	11916	23833	39845	26683	11838	11895	15168	23705	18421	18962	15321	18931	14334	35986	25829	20560	10831	12308	11817	17869	22219	24633	10136	25580	12833	24358	25782	22044
CNAG_00679	1195	1398	1237	427164	934740	547764	951	1447	1825	383124	391611	371601	1532	2402	1808	665460	476631	442810	1570	1970	1204	315270	405560	422366	992	2487	1118	444468	428232	403514
CNAG_00680	1355	1192	1079	5869	7959	6287	3029	1183	2026	5136	4330	4069	871	1436	1033	7074	5906	5579	1335	1670	1114	3620	5072	3738	923	2177	1288	4928	4169	4132
CNAG_00681	1732	1205	1167	1078	1239	1027	2921	1165	2535	380	320	317	1039	1303	1035	1027	1018	1183	1483	1641	1393	262	379	387	1177	2829	1695	446	445	454
CNAG_12088	6	11	12	14	20	17	15	10	16	21	35	7	14	15	7	21	9	17	9	17	14	20	25	18	3	18	8	19	20	21
CNAG_12089	11	18	6	13	17	15	21	8	24	4	6	6	17	27	15	6	14	12	14	26	21	4	13	16	7	24	18	3	8	8
CNAG_12090	5	17	5	15	14	20	45	48	13	10	8	21	12	26	8	14	7	9	9	18	13	8	10	18	12	28	7	20	17	18
CNAG_00682	21580	19685	19516	14426	24492	16720	15662	20344	22004	17565	12872	14288	26701	29643	24479	23659	15372	11942	18069	19085	21515	14779	16056	15274	16099	40888	19920	18241	15766	17481
CNAG_00683	8159	7865	7252	5003	8089	5464	7318	7975	9460	6012	4276	5184	10033	11921	9055	7640	5623	4191	7471	8785	8223	4645	5388	5176	6790	16647	8065	6753	6253	6179
CNAG_00684	8227	8574	8024	4351	8215	6073	6261	5708	10344	7891	7144	5294	10517	10911	9375	7437	4597	4271	7882	9067	9259	6018	6068	5822	7197	17459	9084	10202	6985	8857
CNAG_00685	7293	6790	6399	6382	10976	7140	5210	6216	8479	7120	6091	5023	8255	8813	7754	10008	6709	5584	6028	6532	6930	7113	7682	6375	5545	14194	7067	8843	7135	7964
CNAG_00686	44482	40348	40282	65704	124984	77816	20168	24307	48474	116899	125084	72352	54547	47332	50555	111026	59476	58162	33269	38843	39831	140457	131464	85385	33962	80955	40913	172856	106755	157894
CNAG_00687	2222	1958	1680	1367	1513	1282	3188	2121	2560	1538	951	1318	1979	2606	1754	1615	1222	905	1686	1957	2188	1209	1257	1483	1758	4633	2351	1570	1164	1430
CNAG_00688	2992	3858	3075	3184	5161	3392	3970	3552	5099	2697	2085	2370	4131	6439	4053	3971	3277	2491	3389	5423	4119	1800	2215	3237	3186	7084	3720	2510	2955	2068
CNAG_00689	4739	5571	4866	11917	22590	13672	4954	6123	8106	15778	13301	13625	7361	9172	7176	18428	13069	11065	5035	7419	6279	11058	13858	12284	4840	12884	6630	15683	14598	14231
CNAG_00690	6462	7449	6147	3854	5716	4239	7225	6759	9722	3659	3070	2711	7942	10910	7876	4623	4064	3423	7190	10117	7730	2594	3224	3807	6356	14315	7124	4058	3531	3265
CNAG_00691	8892	8706	7994	15509	25333	15215	6642	8484	9849	11822	9817	10036	11525	13949	11280	21247	16216	12894	7063	8373	7705	11808	13382	9815	6838	16316	7853	12478	9750	10873
CNAG_00692	2715	2506	2436	1929	3470	2001	2447	2639	3199	1826	1492	1523	3142	3561	2853	2876	1985	1773	2212	2708	2511	1489	1571	1406	2222	5012	2392	1999	1767	1787
CNAG_12091	162	186	175	195	299	206	243	154	181	340	253	287	221	297	221	217	200	208	134	204	160	155	185	226	154	341	196	324	201	285
CNAG_00693	7805	6980	7209	3879	6330	4477	6414	6735	9181	4809	3509	3583	9239	10232	8182	5908	3911	3510	6191	7294	7344	3150	3687	3977	5946	14908	7618	4976	4834	4470
CNAG_10016	0	0	0	0	0	0	0	0	1	0	0	0	0	2	2	0	0	0	2	0	2	0	0	0	0	0	1	0	0	0
CNAG_00694	15486	14708	13503	11048	17269	11679	14227	13837	17371	12119	8722	9378	17399	21220	16039	15912	11616	9342	13668	15017	14908	9424	10752	11194	11960	30492	14510	12925	11103	11650
CNAG_00695	3968	3800	3399	3650	6211	3998	3758	4196	4652	4117	2902	3182	4849	5971	4607	5703	4103	3105	3324	3863	3886	3066	3262	3418	2966	7528	3633	4085	3729	3686
CNAG_00696	18161	18586	17021	27186	51951	34554	18520	23881	32430	31575	27582	23763	26709	29299	25529	45113	28989	27076	20482	26308	23191	24111	30714	29623	21758	54228	25495	34988	34638	31578
CNAG_00697	7693	6806	6591	4657	6184	4711	7409	5509	7668	6014	4687	4560	7381	9219	6873	6206	4728	3652	6128	6658	6552	5255	5284	5231	5484	13072	6347	6687	4886	5690
CNAG_00698	5913	5640	5075	9440	14239	9286	5839	6124	7301	9747	7044	7833	7084	8698	6299	13526	10403	7397	4812	5837	5895	8934	9899	8836	4584	11762	5416	10029	7693	8944
CNAG_00699	1553	1035	1171	1020	1614	1258	1261	1168	1831	1359	1011	762	1583	1599	1412	1384	970	1019	1274	1307	1227	808	879	904	1059	2332	1232	1161	1123	1159
CNAG_12092	1715	2059	1527	2442	3656	2699	1828	1955	2179	1959	1838	1660	1964	3286	1953	3006	2625	2325	1997	2544	1649	1397	1871	1637	1351	2729	1180	2143	1605	1710
CNAG_00700	20940	19662	18516	11392	18385	13966	14983	12284	18872	10898	8818	7264	19807	22938	17899	18712	12528	10056	17029	17317	18172	10038	11633	12091	12903	29187	15472	12921	10858	11145
CNAG_00701	7622	7015	6616	2421	2453	2027	7415	6652	8882	2629	2179	2065	8220	10171	7190	2823	2173	1639	6680	8097	7350	2687	2893	3076	5457	12734	6454	3187	2500	2303
CNAG_12093	978	1267	873	2602	3202	2894	2222	1671	1704	1803	1329	1435	1081	2253	1074	3259	3014	2254	1639	1708	1035	1565	2030	2216	865	2061	921	1605	1096	1130
CNAG_07380	11	7	12	39	67	65	6	3	10	7	6	19	16	14	16	46	32	60	18	13	11	46	42	35	3	18	1	26	0	15
CNAG_00702	4550	4384	4228	6321	8453	6316	2983	3310	4702	2567	2495	1717	5541	6170	5162	8249	5707	4393	3795	4462	4387	4951	5000	5841	3042	7623	3852	3804	2640	2736
CNAG_00703	39302	43597	37652	7943	11820	8966	28905	19610	42356	4603	4421	3176	42412	47224	41534	10804	7320	6926	38963	46165	40476	4972	6463	6546	28318	65202	34072	5981	4709	4920
CNAG_00704	8895	8559	8254	7591	10829	7810	9928	10323	10084	10386	6637	9119	10371	13862	9386	10479	8422	6040	7049	8349	8646	6997	7641	7881	7127	17833	8368	9746	8538	9159
CNAG_00705	8938	9736	8296	6652	11474	7627	9568	8181	13740	5234	4655	4274	10833	13609	10887	9335	7179	6461	10371	13982	10903	4707	6279	5878	8692	20751	10106	6503	5510	4973
CNAG_00706	1758	1777	1749	2547	2897	2581	1750	1341	2412	1763	1374	1226	2011	2301	1737	3387	2226	1647	1731	1889	2012	1979	2057	2319	1540	3961	1884	2301	1571	1478
CNAG_00707	3939	4110	3597	3617	5056	3988	6026	3405	9223	2323	2803	1604	3662	4284	3579	4460	2738	2970	5468	6015	4798	3541	3443	3351	5231	11104	6256	4089	2359	2598
CNAG_00708	4632	4887	4250	5274	7787	5304	6108	4373	7194	4324	3612	3381	5410	6846	4986	6630	4921	4527	5300	6788	5288	3895	4642	4080	4621	10709	5556	4871	3691	4108
CNAG_00709	1298	1129	1044	1510	2784	2182	1234	1070	2081	1085	1082	798	1372	1320	1235	2728	1479	1596	1158	1638	1422	1502	1745	1872	1326	3263	1615	1370	1791	1226
CNAG_00710	2314	2222	2079	5894	10931	7163	1962	1809	3004	6811	6029	4596	2395	2706	2194	9590	6173	4831	1889	2392	2154	7620	7520	5992	1958	4546	2335	8531	6401	7617
CNAG_00711	5523	7227	6240	14613	29408	17694	6645	9001	12171	31799	29497	24629	9705	11707	9387	22573	14945	13580	7771	12160	8392	18878	20979	20105	8035	19467	9061	36119	26266	31252
CNAG_00712	3269	3398	3123	3604	4540	3188	3937	3904	4188	4979	2977	4249	3889	5460	3857	4552	3800	2709	2888	3532	3614	3351	3504	3650	2641	7102	3210	4809	3128	3758
CNAG_00713	9543	8619	8615	5732	10130	6772	7683	8868	11728	5125	4254	4035	11892	12947	10673	8617	6128	5046	8455	9677	9695	4077	4920	5371	7983	18824	9686	5749	6102	5197
CNAG_00714	1458	1501	1209	713	1048	742	2241	1523	2028	712	621	795	1438	2042	1301	767	642	536	1497	1893	1660	594	657	663	1162	3131	1507	832	608	765
CNAG_00715	3576	4291	3590	2456	3980	2770	4777	3642	6012	1743	2031	1806	4188	6445	4162	2984	2227	2607	5081	6166	4353	1439	1748	2059	3784	7568	3953	2308	2159	1708
CNAG_00716	53346	45067	48415	28798	57593	39941	29166	28193	77340	18441	26032	12908	59415	51622	60031	44927	22999	31686	60687	70105	57179	21208	28106	24991	47605	96216	58310	31429	28964	24555
CNAG_00717	5200	4565	4717	6915	11751	6936	4280	5190	5259	7761	5738	5565	6361	7571	6040	11016	7482	5398	3917	4534	4898	8478	8012	6130	3801	9785	4943	8133	6249	7428
CNAG_00718	6194	5872	5561	5428	9827	6167	6734	6558	7007	6138	3498	4991	6774	9139	5967	9480	6637	4694	5247	5566	5959	4428	5331	5857	4835	12880	6075	5052	5354	4923
CNAG_00719	6167	5330	4921	4462	6739	4593	6127	5662	6616	4355	3460	3360	5904	7350	5477	6779	4521	3293	5046	4968	5330	4161	4095	4058	4060	10518	5583	5278	3904	4553
CNAG_00720	3838	3302	3412	2876	4336	3029	3039	2677	5224	2538	2604	1796	3957	4109	3944	3823	2507	2740	3627	4181	3562	2235	2645	2539	3238	7146	3939	3812	2768	3076
CNAG_00721	13342	11829	11387	7885	12028	8640	14028	13173	16933	9137	6506	7010	14225	18325	13019	11410	7927	7118	12345	13154	13280	6294	7337	7826	10875	27027	13570	9488	8590	8868
CNAG_00722	4343	4796	3794	2891	4434	3138	4474	3755	5626	2380	2121	1834	4831	6205	4880	3747	2974	2638	4750	5875	4895	2007	2363	2492	3995	8417	4415	2584	2277	2155
CNAG_00723	889	935	845	1312	2157	1472	1147	1258	1508	2722	1857	1855	1239	1661	1170	2060	1489	1128	932	1150	1011	1030	1223	1460	932	2421	1201	2405	1988	2424
CNAG_07381	2542	2448	2194	2108	2488	1968	2836	1866	3010	1695	1474	1391	2574	3132	2495	2425	1727	1435	2375	2455	2557	1651	1660	2647	2001	4714	2254	2321	1475	1665
CNAG_07382	9183	8687	8058	6420	8534	6709	8975	7465	9947	4855	3744	3814	9320	12746	8407	8528	6583	4836	8074	8312	8573	4802	5785	5465	6678	15892	8007	5645	4037	4201
CNAG_12094	342	497	235	507	632	441	831	488	644	492	291	349	280	634	276	540	444	456	789	549	465	263	298	469	297	662	290	400	279	310
CNAG_00726	15	21	18	94	104	115	17	17	15	86	159	142	24	20	11	149	82	59	8	27	13	120	99	104	10	36	27	260	61	195
CNAG_12095	440	489	415	541	860	637	594	556	829	1421	1119	1190	613	798	547	745	589	479	523	728	527	511	493	742	468	1029	551	1283	954	1303
CNAG_00727	14494	13866	12749	6765	12410	7433	12374	17498	16024	4745	3838	4041	17394	22053	16103	10347	7683	6261	14497	14978	14189	6263	8396	5965	10328	25442	12871	5350	4005	4479
CNAG_12096	62	55	39	51	114	119	85	101	87	166	165	132	46	55	40	74	85	95	59	82	38	40	76	64	38	94	50	158	140	156
CNAG_00728	2918	3085	2855	5096	9692	5532	2758	3063	3582	5952	4559	4693	3798	4811	3839	8321	5741	4639	2883	3732	3253	4723	4896	4957	2579	6489	3207	6406	5287	5574
CNAG_12097	181	268	205	353	526	407	451	407	487	484	477	385	207	312	218	488	361	391	429	365	270	320	448	250	258	526	262	624	313	399
CNAG_00729	0	0	0	0	0	0	0	0	0	0	0	0	0	0	0	0	0	0	0	0	0	0	0	0	0	0	0	0	0	0
CNAG_00730	32325	26283	28216	12355	20285	15539	25009	27724	38557	10229	10468	6595	34090	33725	30392	19059	11791	10012	33280	33417	36768	14982	15361	18829	25236	61876	32904	16046	15604	12111
CNAG_00732	15313	15492	14038	13606	18466	13974	4123	5709	4527	9962	7071	8769	20876	27107	18269	17982	13212	8845	7452	8648	7852	21657	20718	18191	3060	6767	3235	10383	6032	9608
CNAG_12098	78	120	95	45	67	59	49	96	70	30	23	10	138	198	146	56	52	49	136	140	67	22	43	38	61	99	26	37	23	32
CNAG_12099	32	43	34	93	92	68	85	66	75	103	75	139	25	69	43	118	80	74	69	42	59	71	77	74	38	98	57	152	62	112
CNAG_12100	197	176	158	290	468	334	257	215	292	300	317	383	183	233	200	360	295	241	168	262	175	216	251	320	152	398	187	410	348	332
CNAG_00733	3007	3011	2709	2298	3229	2553	3661	2861	4281	1847	1494	1504	3194	4122	2996	3273	2479	1771	2999	3443	3485	1715	2029	2380	2452	6971	3262	2234	1978	1829
CNAG_00734	2298	2204	1994	2228	3304	2301	1857	1922	2477	1338	1058	1065	2285	2787	2266	3131	2298	1810	2021	1884	2052	1630	1697	1720	1601	4023	2199	1487	1500	1262
CNAG_00735	321	406	304	8726	15487	9456	515	512	695	4872	4665	3924	337	426	359	12693	8726	8607	355	327	372	7141	8569	7050	397	859	449	6748	5488	6072
CNAG_00736	7361	7412	6550	3781	6244	4160	9305	8221	11377	5872	4300	4426	9121	11377	8828	5375	3907	3415	7566	9711	8300	2765	3426	3722	7061	17390	8704	5853	5149	5364
CNAG_00737	5235	5386	4977	4858	8936	5820	4748	4696	4819	7434	5225	5836	6331	7965	5475	8496	5965	4121	4604	4541	5088	5609	6591	5952	3486	8560	4340	7254	5790	6936
CNAG_12101	321	421	382	164	268	186	726	488	823	302	233	348	428	672	371	198	203	145	544	769	502	83	176	145	360	945	444	331	206	292
CNAG_10017	13	2	4	148	264	247	4	1	7	112	215	106	0	4	0	157	105	94	5	9	0	127	147	190	4	7	4	182	104	88
CNAG_00738	488	465	457	569	725	672	759	808	786	1025	731	915	584	705	663	776	558	482	606	557	542	391	527	580	445	1018	492	1046	702	761
CNAG_00739	9223	10521	8614	5966	10284	6863	9111	8465	13769	5760	4840	4660	11856	15212	12011	8363	6133	5490	10323	14631	11448	4227	5452	5959	9001	21760	10755	5766	6115	5043
CNAG_00740	15328	13276	13243	10452	15707	10875	17883	16476	16040	13830	9060	11678	16340	20906	14226	15525	11846	9060	12140	13007	14480	8447	9952	10385	11209	29170	14049	13499	11003	12670
CNAG_00741	29256	23130	24058	8665	13980	9606	17502	16024	30191	6803	6365	4642	30082	28189	27058	13649	7792	7705	23350	23462	26344	8319	8839	7908	20159	48025	27394	9445	7304	8306
CNAG_00742	9048	8411	7907	5415	8155	5927	8716	8168	10754	5638	4044	4362	10464	12739	10246	8069	5270	4856	7848	8962	8752	3523	4660	4291	7055	17193	8864	5353	5322	5181
CNAG_00743	8845	8501	7790	4208	5111	4117	6061	5520	7848	2198	1900	1516	8818	10411	8415	5563	3725	2736	7658	6876	7415	3190	3330	3178	5294	12833	6694	3128	1893	2236
CNAG_00744	5615	5588	5482	5559	7880	5775	5774	5469	7138	5437	4690	3894	6525	7395	6398	7822	5631	4124	4873	5441	6117	8942	7962	7294	4903	13174	6273	7349	3908	5536
CNAG_12102	274	350	281	369	501	467	424	367	651	505	533	418	323	485	273	476	405	338	412	447	313	393	338	332	328	651	380	679	383	572
CNAG_12103	135	219	119	846	1343	917	164	288	220	1906	1788	1858	167	238	193	1063	881	844	134	183	155	1155	1137	783	152	432	171	2042	1107	1497
CNAG_00745	14860	13868	14297	41816	63448	45665	11856	15108	14723	32775	26966	25375	17649	21055	16962	61774	43974	33275	10430	11141	11215	47411	50100	34258	10279	25886	12627	37917	23018	36097
CNAG_12104	0	0	0	0	0	0	0	0	0	0	0	0	0	0	0	0	0	0	0	0	0	0	0	0	0	0	0	0	0	0
CNAG_00746	15341	14226	13539	6785	10644	7950	12850	12494	18015	6286	5112	4849	17328	19261	15972	9769	6943	6091	13613	15366	15554	5401	6008	6780	11623	27993	14383	7038	6735	6460
CNAG_00747	29354	23909	24614	23960	37955	26962	22204	19160	28720	19339	15795	14999	28052	32296	26380	36970	24614	21042	24256	23811	23459	17918	21258	20064	19790	45054	23817	23388	16519	20519
CNAG_00748	1310	1200	1207	1811	3129	2053	1248	1155	1763	2049	1575	1797	1526	1843	1493	2588	1861	1556	1161	1549	1273	1372	1591	1782	1072	2850	1359	1930	1993	1601
CNAG_12105	46	52	43	51	62	49	46	35	77	30	38	16	65	82	52	49	39	46	80	52	52	25	40	42	27	65	47	56	19	31
CNAG_12106	0	0	0	0	0	0	0	0	0	0	0	0	0	0	0	0	0	0	0	0	0	0	0	0	0	0	0	0	0	0
CNAG_12107	856	942	901	625	749	652	1307	1168	1491	1318	894	1106	1117	1585	1116	770	604	409	895	1179	955	454	634	704	897	2074	1059	1266	837	1049
CNAG_00749	0	0	0	0	0	0	0	0	0	0	0	0	0	0	0	0	0	0	0	0	0	0	0	0	0	0	0	0	0	0
CNAG_00750	1757	2149	1765	2253	3654	2740	1589	1474	2242	2360	2253	1777	2425	2743	2461	3180	2088	2112	1982	2670	2059	1746	2134	1782	1643	3693	1809	3159	2052	2664
CNAG_12108	310	385	344	718	1014	745	548	454	530	1556	922	1478	429	656	445	1036	745	479	384	462	357	541	713	960	275	775	508	1594	1225	1477
CNAG_00751	121	117	193	251	440	398	138	215	251	690	450	399	210	240	171	443	268	249	171	181	194	262	268	430	130	436	143	629	687	645
CNAG_12109	60	84	89	50	111	59	100	37	104	30	24	40	78	113	85	70	69	69	123	136	90	61	70	19	67	140	91	59	25	38
CNAG_00752	585	598	544	438	657	377	574	493	703	510	407	422	713	888	524	514	499	334	580	651	647	331	408	392	413	1089	572	588	378	559
CNAG_00753	7328	7227	6425	6433	9130	6354	7545	7975	8517	6516	4107	5493	8052	11227	7999	8477	6773	5034	5758	7530	6966	4414	5346	6201	5824	14803	7172	5477	6285	4871
CNAG_00754	15285	14581	13794	9162	13003	10599	13504	13012	17814	6519	6040	4985	16945	19614	15267	13708	9080	7768	14979	14962	16257	9298	9374	9751	11906	29523	14889	8819	6471	7089
CNAG_00755	1515	1416	1218	1241	1949	1307	1301	1241	1900	1688	1218	1280	1906	2084	1620	1604	1112	931	1234	1649	1631	929	1117	1254	1469	3677	1713	1872	1732	1923
CNAG_00756	1759	2017	1617	1205	2119	1250	1434	1331	2348	1597	1495	1621	2207	2677	2192	1806	1256	1193	1761	2431	1931	1002	1316	1172	1620	3668	1766	1852	1594	1858
CNAG_00757	9596	8874	8640	9901	17292	11163	8770	9738	11618	12007	9259	9808	11997	13188	10549	16266	11286	8637	8091	9266	9392	9955	11239	9670	8018	19477	9631	12902	11210	12701
CNAG_12110	235	300	238	993	919	803	664	320	597	400	274	461	287	439	271	1042	949	686	265	406	306	637	730	578	290	474	304	414	365	302
CNAG_00758	8565	7181	7619	3088	3842	3048	8595	4101	7976	2758	2055	2317	8057	11014	7526	4253	3218	2237	5699	5585	5574	3223	3383	3628	5583	13264	6960	3093	2767	2468
CNAG_00759	293	169	195	536	695	565	363	369	442	1432	859	1411	260	401	318	683	632	438	215	269	260	454	478	647	235	502	290	1020	954	1091
CNAG_00760	8633	7791	7742	3482	5133	3781	7818	6827	9252	3246	2507	2588	9561	11876	8377	4851	3450	2769	6972	7899	8347	2532	3080	3437	6499	16594	7843	3670	3620	3368
CNAG_00761	4675	5669	4788	3806	5153	3544	7508	6389	7151	4140	2790	3965	5876	9486	5854	4174	4064	3132	5249	7644	5831	2561	2810	3620	4788	11135	5212	3806	2953	3125
CNAG_00762	1470	1640	1368	2550	2638	2196	1373	1422	1951	2130	1881	1413	1533	2011	1367	3004	2337	1417	1737	1375	1419	2814	2358	2669	1122	2850	1371	2837	1506	2174
CNAG_07960	2042	2621	1995	4904	8247	5391	2713	2545	3657	7292	5800	6058	2932	4040	2630	7017	5373	3885	2484	3449	2778	4854	5812	5882	2337	5909	2587	7923	5402	6559
CNAG_00764	3787	3997	3497	4332	4616	3660	4183	3269	3892	3951	3034	2873	3474	5087	3419	4945	3988	2646	3036	3144	3387	4598	3723	5576	2500	6543	3095	5243	2755	3571
CNAG_00765	9237	9523	8988	41997	59769	50420	17433	13370	12869	129130	67677	133425	10205	18152	9754	61557	58615	35852	7577	9341	8821	41541	49954	84719	8075	20910	9663	78874	127297	69515
CNAG_00766	4199	5024	4466	2356	4253	2483	4130	4954	6151	17321	12812	13475	6293	6993	5421	3808	2573	1658	4075	4626	5030	8265	7322	5299	4462	11022	5275	20205	10444	19314
CNAG_12111	68	75	69	142	159	150	137	136	149	428	310	417	108	127	100	134	183	105	51	108	68	222	206	218	112	252	112	455	257	338
CNAG_00768	7424	7601	6845	6467	9999	6736	6675	8301	8278	7232	4720	5853	9560	12122	8959	9226	6960	5243	6510	7254	7701	5047	5768	5728	5822	14471	6886	6401	5886	5954
CNAG_00769	15307	14955	14098	10770	14996	9988	13416	15322	13983	9845	6304	8192	18146	25522	16893	14346	11906	7831	11598	13320	13792	9081	9561	8931	9856	26120	11748	9095	7776	7824
CNAG_00770	5682	5676	4977	4580	8081	5467	5706	5150	8529	4704	3586	3330	7071	7564	6335	7039	4814	4354	5057	7230	6693	3326	4224	4026	5504	14266	6701	4670	4715	4583
CNAG_00771	33464	37149	29913	5607	8191	6670	37973	22634	41119	3535	3283	2431	34800	53269	34660	7225	5627	5399	39484	46138	34613	3246	4337	4699	26030	58130	30272	4145	3060	2874
CNAG_00772	9522	9416	8806	6949	11600	7716	9172	9283	9354	10276	6744	8303	11737	15495	10704	10866	8086	5326	8495	8472	9212	6152	7080	8573	6876	17179	8507	8758	9338	8617
CNAG_12112	21	48	37	39	49	44	88	46	46	83	75	92	54	104	35	71	61	57	35	49	48	41	71	43	41	53	43	78	70	61
CNAG_00773	3017	2637	2490	3633	5572	3793	3132	2625	3436	4181	3032	3702	3173	4183	3125	5379	3883	3184	2348	2886	2880	3098	3580	2885	2427	5466	2729	4079	2978	3473
CNAG_00774	16717	18483	16053	9154	12708	8946	14797	13396	16408	4908	4073	3801	17369	22364	15632	13217	9554	6443	15992	15350	17003	7716	7452	6675	10816	27562	13581	6424	3363	5390
CNAG_00775	3172	3237	2864	2743	3238	2646	3284	2691	3899	1965	1809	1261	3082	3882	2997	3553	2456	1663	3285	2967	3209	3063	2658	3100	2496	6371	3334	3169	1730	2282
CNAG_12113	1487	1543	1325	464	610	488	1740	1188	1903	737	618	607	1451	2021	1454	523	420	438	1307	1750	1246	445	443	413	987	2362	1240	841	690	587
CNAG_00776	419398	287952	291174	244714	323010	248034	351154	473035	458210	278223	213592	200684	467394	564260	399515	367090	265303	177984	318426	392418	330205	221145	267808	214963	362456	967981	484228	252704	274226	271739
CNAG_00777	30725	26560	27233	33221	53680	38044	20672	27496	28154	27623	20952	22961	36808	41499	33125	53552	35624	28791	22692	23145	25006	26369	28679	28631	20039	52834	25849	27297	31933	24432
CNAG_00778	12177	11011	11062	16119	25446	16817	12461	15495	14625	18165	12345	14039	15750	20100	14551	24474	17937	13252	10016	11612	12931	12597	15342	15166	11047	27548	13359	15688	15996	15600
CNAG_00779	60940	73168	57437	11274	15836	12980	69894	41316	70321	6528	5499	4749	62642	94853	62634	15244	11913	11237	57230	74967	62073	6273	8216	9996	46626	104556	51926	7085	5696	5091
CNAG_00780	2700	2601	2489	1177	1675	1239	4064	3369	3284	1674	923	1523	2877	4249	2552	1627	1280	1022	2505	2654	2941	730	940	951	2343	5945	3011	1477	1138	1500
CNAG_00781	2473	3202	2283	1003	1895	1437	3445	2390	3847	1023	957	1031	3112	4506	3159	1389	1104	1078	2947	4445	3064	839	1011	1166	2494	5739	2626	1214	1172	970
CNAG_00782	4670	4749	4329	2867	4213	3025	4078	4469	5409	2924	2051	2066	5773	7470	5297	4262	3003	2164	3931	4976	4722	2534	2599	2978	3542	8933	4296	2830	2654	2562
CNAG_00783	3787	4577	3606	4485	7214	4473	6334	5530	5397	7165	4644	7343	4695	8271	4686	5774	5368	3605	3725	5647	4537	3680	4260	4388	3847	9150	3987	6265	4404	5273
CNAG_00785	62142	57347	54238	21754	28185	24348	51722	37554	69195	13545	13695	10087	63048	70741	58317	30553	19996	17918	54543	55867	56900	17780	18799	19946	43894	103241	54218	20429	14162	14878
CNAG_00784	37	40	33	26	30	30	59	47	24	37	32	62	15	58	28	56	32	18	53	31	28	15	33	25	20	37	24	35	36	39
CNAG_00786	1675	1941	1501	2169	3509	2161	2080	1559	2475	1799	1745	1745	1786	2894	1747	2827	2209	1819	1957	2726	1836	1726	1877	1419	1537	3384	1694	2477	1315	2131
CNAG_00787	7925	6658	7266	8292	15027	9593	5580	6663	9413	7688	6839	5762	9661	9373	8510	13357	8421	7424	6551	7640	7796	6755	7909	7019	6496	16009	7836	9758	8648	9093
CNAG_00788	28876	25740	24908	9554	13346	10603	21780	18089	28860	5674	5060	3471	27586	31459	25168	14341	8751	7918	25188	24475	26010	7366	8179	8509	19179	46825	24880	8018	5416	6240
CNAG_00789	9	9	10	4	17	19	21	11	13	8	5	10	11	14	10	17	23	17	6	1	2	7	9	5	6	21	10	11	10	3
CNAG_12114	1074	1053	995	1435	1813	1470	1935	1381	1814	1994	1305	1836	1287	1504	1073	2005	1777	1408	1393	1481	1193	1479	1612	1410	910	2278	1168	1900	1221	1956
CNAG_00790	6565	6236	5941	5817	9817	6433	4698	6168	7362	6318	5078	5445	7786	9556	7694	8439	6485	5136	5534	6623	6576	5382	5972	4885	5321	12982	6301	7020	5992	6128
CNAG_00791	10778	10097	10061	17824	25320	19877	7411	5557	6374	11998	7010	9670	12442	17476	10691	25811	20248	14383	6335	8158	8412	13724	16266	22410	4109	10608	5194	9825	11966	9154
CNAG_12115	18	8	14	81	118	88	20	8	6	33	13	29	23	39	16	83	97	60	18	40	28	43	56	60	9	17	7	5	18	6
CNAG_00792	6746	5727	5629	9116	15929	10568	7586	5889	8797	7829	5393	5844	6886	8001	6103	15175	9869	9050	5992	6349	6323	7565	9403	8112	5294	13887	6965	7263	7711	7057
CNAG_12116	174	167	110	260	390	310	169	262	191	313	215	245	206	241	149	356	275	307	359	243	221	283	401	322	107	297	138	253	285	204
CNAG_00793	4703	5250	4105	3630	5198	4232	5481	4031	6657	2592	2550	1975	5380	7667	5347	4778	3716	3432	5038	7378	5096	2664	3229	3025	4187	9101	4603	3348	2224	2350
CNAG_00794	4579	4239	3896	4132	5500	3873	5634	4736	5481	2561	1838	2071	4922	7040	4844	5183	4533	3042	4013	5232	4625	2512	3084	2648	3592	9018	4314	2331	1990	1937
CNAG_12117	2114	1890	1853	2490	3730	2692	2726	3556	3326	5036	3399	4507	2497	3504	2571	3227	2740	2082	2093	2733	2122	1718	2119	2925	1916	4493	2135	4166	4360	3655
CNAG_00795	3	8	3	5	4	9	4	9	1	2	9	2	1	4	1	11	7	3	2	2	3	4	4	1	2	9	5	4	10	7
CNAG_00796	8292	6997	7132	10480	16283	11156	6894	7544	12026	9598	10651	6848	9929	8983	9034	15388	8882	8264	9076	9654	9047	12780	12878	10841	7841	18091	9522	16616	10619	13914
CNAG_00797	27105	21546	21581	226794	386539	302171	16285	15123	27511	72543	65829	58413	25907	26465	25851	366185	236306	233251	21456	21109	21340	87204	129632	150381	17394	46349	24037	79090	109982	66238
CNAG_07961	623	494	462	4018	4535	4099	434	413	599	3285	2848	2080	600	933	621	4100	3439	3176	508	585	495	2999	3671	4231	342	1031	456	3578	2882	2214
CNAG_00798	437	437	407	350	451	388	493	353	543	1101	779	1092	485	845	496	394	275	304	256	366	380	406	436	470	269	745	382	917	849	766
CNAG_00799	118638	107065	100634	47958	63352	54768	112800	124072	134722	57557	38426	50102	149739	184899	136516	67117	52306	43002	102306	114738	122099	25111	35769	46010	95191	241568	121511	47221	59679	44303
CNAG_00800	2733	2747	2456	2445	4188	2778	2612	2225	3747	8951	7498	6365	3453	3841	3156	3889	2590	2035	2884	3413	2748	5268	4777	3715	2577	5728	2965	11136	6268	9808
CNAG_00801	792	786	680	1015	1872	1298	821	783	1301	1479	1611	1152	1042	1283	1026	1643	1120	927	770	1238	1100	1166	1306	1170	840	1977	1056	1966	1419	1578
CNAG_00802	2098	2029	1975	2871	4586	2956	1651	2005	2671	2891	2365	2321	2804	3061	2784	4107	2985	2389	1730	2257	2071	2860	2934	2240	1830	4270	2114	3391	2452	2950
CNAG_00803	11191	10367	10252	11606	17970	11749	9479	11961	12160	15180	10392	11596	13331	16119	12826	17819	13036	9600	8328	9726	10305	11777	12459	11177	8316	21861	10455	14719	11915	14082
CNAG_00804	3548	3806	2829	2114	3984	2698	4614	3397	5151	2914	2508	2375	3966	5698	3684	2948	2342	2483	3785	5416	3804	1736	2175	2422	3174	7452	3835	3209	2598	2560
CNAG_00805	3820	3731	3525	5741	8848	5990	3487	4120	4140	5871	3793	5549	4705	6235	4282	8107	6380	4990	3184	3887	3912	4283	5232	5095	2811	7538	3136	5381	5056	5202
CNAG_00806	17610	17117	16321	13557	25819	18893	14294	14032	22472	13291	13454	10663	21785	24070	21034	22953	14590	14167	18422	20437	19504	11533	13782	14126	15888	34674	18115	16321	16516	13685
CNAG_00807	20283	18132	17887	14098	24122	15205	15268	25453	20724	39512	25476	30526	26525	30693	23628	22673	16607	10827	13540	15650	17852	24767	24861	21599	16368	41080	19729	35239	28357	36422
CNAG_00808	9019	7799	7078	3629	6289	4550	8445	6119	14111	1849	2013	1446	8119	9981	8660	5102	3036	4675	9625	12485	8289	1617	2383	2263	8200	15629	9146	2385	2657	1955
CNAG_00809	19362	19606	17411	23734	21730	19603	19688	17669	20736	14342	12805	9951	19826	26513	18799	27259	20254	12516	18404	16995	17279	26251	22928	25961	13458	34414	16382	22905	9839	16018
CNAG_00810	3882	3918	3540	1743	2647	1697	3662	3691	4100	1795	1524	1607	4684	6005	4386	2511	1769	1281	3232	3644	3769	1373	1622	1603	2875	7113	3595	2088	1509	1876
CNAG_00811	6103	6595	5421	2562	3508	2707	5731	4848	6332	2095	1508	1471	6555	8749	6166	3577	2953	2235	5344	5833	6098	1485	1844	2316	4279	9700	5254	2162	2031	1982
CNAG_00812	4308	3919	3479	3092	4888	3151	4673	3537	5210	4882	4116	4334	5006	5421	4258	4628	2955	2709	3603	4150	4301	3213	3060	2942	3390	8658	4473	5015	3940	4579
CNAG_00814	6252	4916	5014	5101	8231	5625	7078	5355	6440	6443	4964	5324	5916	7281	5573	8293	5761	4813	5272	4931	4494	5465	5663	5108	3937	9154	4710	7703	5617	7315
CNAG_00813	227	208	204	147	297	167	361	349	191	286	128	262	249	451	228	260	219	137	258	164	198	211	210	257	129	330	202	341	226	261
CNAG_00815	1780	1724	1674	3923	5551	4317	859	1181	1371	2564	2742	1717	1908	2343	1857	6154	3916	3021	1208	1318	1192	5857	4789	5635	919	2078	1045	4435	1825	3674
CNAG_00816	20250	22390	18319	24240	45018	28416	16846	21286	31496	31882	33171	24831	26215	31189	25691	35091	25139	24124	19613	31314	21170	26430	28478	24672	20845	43333	20853	40521	30059	34959
CNAG_00817	1414	1240	1217	1035	1722	1167	1604	1532	1708	1980	1359	1587	1455	1929	1409	1412	1260	846	1200	1269	1434	1227	1383	1262	1077	2792	1325	1902	1462	1834
CNAG_00818	3044	2811	2724	2301	2705	2132	4881	4552	5255	2652	1722	2231	3489	4873	3293	2939	2131	1505	2841	3457	3389	1605	1788	1772	3028	8110	3775	2632	1948	2449
CNAG_00819	19768	22411	18724	9782	16285	12238	19087	13797	26743	6381	6773	5606	20363	26064	20160	13502	9316	10669	22493	27781	21268	6368	7808	6935	18068	34831	18612	8017	6456	5915
CNAG_00820	1619	1729	1500	1750	2714	1910	1327	1117	1613	1416	1038	876	1868	2128	1751	2507	1714	1575	1489	1723	1605	1102	1330	1342	1129	2594	1321	1446	1390	1183
CNAG_00821	35813	42597	33693	8318	11859	9605	31469	22234	45606	4958	4935	3379	38944	51723	38915	10862	7570	7496	41957	50456	39365	5281	7110	6686	30473	60141	33047	6425	5042	5070
CNAG_12118	1290	1402	1199	880	1419	851	1081	1134	2008	789	907	689	1523	1866	1651	1074	718	926	1596	2051	1231	560	544	661	1186	2606	1359	1098	964	794
CNAG_00822	8733	8190	8083	5842	7543	6058	6056	5729	8942	3615	3084	2343	9084	10290	8257	7688	5248	4033	7391	7555	7760	4689	4723	5405	5697	13982	7055	4654	3284	3515
CNAG_00823	1919	1719	1821	3276	5673	4158	2026	2074	2591	3617	2722	3277	2377	2784	2318	5255	3846	3175	1729	2095	2027	2612	2995	3336	1682	4292	2095	3352	3601	3345
CNAG_00824	5761	5422	5030	5842	8417	5863	6888	6644	6207	6697	3787	5839	6727	10150	6072	8303	6543	4353	4481	5100	5251	4001	4548	5891	3852	10157	4998	5348	5751	4928
CNAG_10018	0	4	0	2	0	0	0	2	0	0	0	6	0	4	0	2	6	2	4	4	0	0	4	0	0	0	0	1	0	0
CNAG_12119	252	331	197	270	430	406	301	269	458	429	435	342	358	433	370	406	323	270	308	402	360	319	392	352	308	741	298	493	319	423
CNAG_00825	4491	5047	4253	4044	5356	4211	5965	5119	6126	3140	2306	2987	5463	8677	5327	4960	4187	3424	4499	5816	4619	2961	3673	3267	3975	9480	4991	3187	2649	2790
CNAG_00826	1782	1607	1609	4383	7529	4392	3195	2830	4695	5163	4242	3445	2128	2045	1711	6842	4226	3644	2567	2638	3009	4330	4713	3318	3068	7868	3970	5210	5112	4977
CNAG_12120	22	35	24	65	168	112	51	56	32	81	93	72	34	115	24	176	118	98	31	47	27	105	56	39	25	77	35	120	53	86
CNAG_00827	173	227	175	6341	11925	7164	1927	950	2852	22366	22824	17998	183	367	193	9139	5808	5705	408	656	464	11529	12171	12017	1563	3332	1597	27395	20397	23908
CNAG_00828	1990	1690	1669	3718	4911	3447	1773	2017	2161	2818	2010	2174	2034	2550	1988	4679	3370	2737	1527	1737	1790	3063	3528	2845	1409	3306	1723	3156	2198	2800
CNAG_00829	12801	13881	12200	14046	23407	17156	11864	13202	18827	10960	10191	9643	15836	22233	16756	18649	14283	13611	15062	20274	15914	9269	11175	13779	12231	28864	14851	10949	13088	9587
CNAG_00830	5245	4924	5184	6741	11860	7723	4835	5643	6636	7354	5661	5847	6503	7464	5828	11064	7837	6029	4735	5403	5602	5794	6744	6383	4705	11572	5617	7362	7070	6889
CNAG_00831	3991	3362	3439	7012	11770	7737	3493	3318	4857	10468	8630	7497	4093	4822	4031	10821	7392	5498	3466	3511	3632	6762	7273	7768	3135	7706	3799	12436	9663	11836
CNAG_00832	4323	4287	4247	8569	17856	11446	3108	3939	6110	10383	10907	8470	5934	6174	5968	14452	9077	8832	4667	6325	5515	12136	15575	15603	4069	8994	4371	11754	14110	10643
CNAG_12122	650	559	557	686	1044	714	795	625	907	907	657	730	658	850	572	864	774	507	496	668	547	687	915	1028	515	1206	554	836	919	677
CNAG_00833	567	570	521	370	651	388	636	536	744	1094	777	828	718	940	737	584	437	316	441	502	565	535	598	582	404	1242	539	948	803	834
CNAG_00834	39864	42492	38087	12580	26221	16146	38473	38765	65821	77406	64889	52993	56852	60549	52029	22287	12486	10870	33535	46161	43737	40939	37518	27342	45695	115224	56375	84611	50817	81560
CNAG_00835	2115	2086	1987	2216	3578	2706	2230	2093	2438	4772	2981	3898	2645	3277	2489	3701	2814	1951	1779	2238	2144	2383	2601	3006	1745	4223	2093	3761	3800	3944
CNAG_00836	1734	1837	1802	1197	1445	1211	2737	2253	2597	917	627	543	1933	2615	1919	1428	1127	857	1742	2215	1953	578	864	1022	1510	4229	2007	803	762	637
CNAG_00837	3596	3425	3281	3561	5779	4059	4161	4571	5376	3817	2416	2825	4471	5131	3970	5545	4133	3093	3067	4243	3918	2319	3083	3419	3753	9068	4296	2955	3867	2915
CNAG_00838	2034	2268	1699	1270	2043	1497	1736	1671	2456	565	542	574	2451	3269	2566	1649	1198	1194	2014	2815	1952	405	555	768	1508	3440	1931	571	679	521
CNAG_00839	1712	1656	1460	1436	2180	1559	2009	2100	2408	1264	919	1072	2031	2407	1905	1911	1474	1272	1698	1878	1916	795	875	996	1697	3942	1783	1208	1208	1108
CNAG_00840	386	389	313	1594	2544	1593	883	628	756	1830	1232	1659	397	599	388	2252	1703	1212	350	555	558	987	943	1249	487	1310	625	1718	1493	1470
CNAG_00841	1924	1480	1444	2002	3287	2285	2101	1643	2132	2394	1617	2247	1897	2413	1586	3028	2218	1677	1510	1600	1639	1500	1825	1966	1472	3227	1638	2226	2057	2165
CNAG_07386	1493	1277	1263	1001	1594	1142	1395	1506	1648	1210	888	931	1536	2156	1629	1296	865	793	1138	1208	1163	509	741	843	1071	2794	1269	1164	1077	871
CNAG_12123	26	19	10	18	31	31	63	35	85	129	93	79	29	30	29	23	27	12	20	44	18	33	14	28	37	90	38	109	83	81
CNAG_00843	1271	1193	1086	1358	2356	1626	1269	1187	1732	917	728	514	1601	1858	1446	2130	1260	1249	1075	1348	1423	687	782	879	1156	2746	1371	989	776	858
CNAG_00844	191	145	110	3658	6495	4605	284	156	314	2646	2048	2092	151	195	174	5876	4099	3609	113	139	145	1625	2138	2882	177	405	209	2321	3344	2287
CNAG_12124	8	11	16	1	6	11	37	15	16	0	2	7	10	19	11	3	0	1	12	10	11	1	3	0	5	15	7	1	1	2
CNAG_00845	2599	3016	2560	3906	4597	3796	2865	2119	2937	2194	1838	1779	2581	3435	2466	5116	3862	2670	2631	2670	2832	3416	3583	4216	1953	4827	2420	2832	1631	1854
CNAG_00846	1529	1931	1511	2712	3118	2567	1678	1578	1822	1985	1319	1350	1703	2287	1649	3292	2747	1646	1711	1631	1598	2118	2390	2854	1221	3270	1452	2091	1421	1657
CNAG_00847	1751	1749	1586	957	1699	1177	1707	1551	2175	1369	1027	1213	2014	2498	2084	1531	1151	945	1609	1941	1902	710	805	1027	1375	3466	1666	1410	1307	1361
CNAG_00848	124627	163821	136764	55344	98985	73518	75571	92557	88504	654750	404330	513963	216100	267223	173283	108926	60313	41615	68545	97122	104693	358201	303381	211750	70042	191963	85680	597206	248290	626250
CNAG_00849	3151	2747	2414	277	418	303	2064	2013	1725	809	463	754	3892	5783	3705	433	373	234	2320	2564	2548	442	498	403	1599	3501	1586	699	381	687
CNAG_00850	1109	942	981	1111	2258	1342	820	1223	1084	1043	709	1023	1163	1741	1054	2021	1433	793	806	842	799	946	994	990	738	1820	919	835	898	917
CNAG_12125	71	65	56	62	106	70	58	68	59	256	113	170	81	110	73	90	95	65	39	54	61	144	118	91	59	93	43	182	78	177
CNAG_00851	333	378	293	221	423	247	188	219	449	1163	1492	1061	381	304	329	374	270	204	221	264	265	1125	893	513	287	644	280	1845	1007	1750
CNAG_00852	4251	5064	4405	3545	4624	3362	5236	4722	5366	4098	2706	3545	4990	7018	4570	4493	3723	2550	3974	4591	4541	3814	3886	3568	3713	9749	4442	4231	2863	3771
CNAG_00853	2905	2699	2315	1383	2191	1632	2561	1788	3382	1193	1048	961	3041	3110	2821	1853	1467	1314	2620	3314	2789	1017	1173	1220	2344	5125	2618	1313	1188	1042
CNAG_00854	6035	6350	5387	593	662	576	8911	7791	9327	453	240	332	6571	9800	6230	687	690	568	6123	7843	7763	226	309	398	5240	14222	6745	354	443	274
CNAG_10019	0	0	0	0	0	0	0	0	0	0	0	0	0	0	0	0	0	0	0	0	0	0	0	0	0	0	0	0	0	0
CNAG_00855	5154	5000	5052	4530	7487	4726	4281	4769	6493	4402	3652	3359	6394	6976	5739	6763	5139	3923	4408	5348	5568	3665	4201	3838	4496	11481	5409	4711	4426	4348
CNAG_07387	579	598	588	998	1513	1119	580	629	872	1120	953	764	756	743	646	1666	958	781	644	677	690	1272	1092	1428	619	1379	734	1679	1151	1343
CNAG_12126	4	1	1	10	10	1	4	5	19	7	10	2	1	0	0	6	2	6	14	1	4	2	4	7	6	16	6	23	7	9
CNAG_07388	0	1	0	1	7	3	5	4	4	6	3	0	2	6	1	6	0	2	3	1	0	2	6	0	1	0	0	6	2	1
CNAG_07389	4411	4025	3883	10372	14900	11282	5440	5343	6258	7122	5288	5575	5109	6513	4803	14476	10961	8554	4149	4510	4387	6590	8474	8035	4038	10567	5170	6972	6837	6392
CNAG_12127	102	86	96	133	200	125	181	168	128	214	136	227	135	274	153	118	160	79	95	165	131	83	67	123	73	210	107	160	125	159
CNAG_07390	124	176	153	198	252	206	311	350	218	401	208	414	201	447	260	239	290	139	145	238	186	123	148	199	115	359	204	296	196	253
CNAG_07391	666	485	512	386	496	380	939	614	1165	363	436	290	467	613	550	473	328	347	680	894	630	249	292	340	680	1530	811	499	331	442
CNAG_07392	3547	3691	3078	2682	3847	3141	4587	4539	6250	2440	2118	2175	3658	5200	3964	3302	2756	2577	4123	5814	3819	1421	1971	2553	3723	8216	3715	2625	2602	2112
CNAG_00858	19409	18946	17247	18338	23406	16973	22768	23403	23550	16447	11238	14607	21958	31733	22139	23523	20627	14745	15233	19949	18268	12278	13164	14265	16527	38659	17682	14903	13475	12799
CNAG_00859	2840	2656	2445	8454	12451	8669	3434	3043	3619	8842	6159	7083	3593	4787	3107	11815	9768	6359	2398	2618	2471	5465	6646	7969	2011	5033	2632	7767	8721	7219
CNAG_07393	472	419	350	557	1028	613	657	664	1086	827	581	519	694	1052	693	1045	812	814	823	1062	766	539	595	522	781	1553	844	967	655	681
CNAG_07394	239	204	254	693	887	548	241	291	360	425	355	420	257	403	274	884	704	494	194	276	229	359	341	326	153	427	201	443	349	467
CNAG_06802	37	12	17	55	71	67	26	10	43	37	27	24	12	20	24	75	64	43	41	41	21	41	39	28	31	50	35	44	23	50
CNAG_07459	789	1008	864	946	1497	1052	816	790	1114	1351	1148	1212	1059	1437	1008	1498	1002	813	806	1094	970	1007	1036	1188	630	1728	777	1576	1195	1472
CNAG_06801	5694	6887	5341	4945	8916	5984	7482	6185	9967	5947	5442	5207	7688	10749	7365	7163	5309	4961	6953	10759	7463	3744	4674	5376	6147	14852	6902	6591	5938	5667
CNAG_12128	22	35	29	49	79	39	50	46	63	74	57	69	46	87	58	53	28	42	43	41	21	43	44	41	37	84	39	91	51	48
CNAG_06800	13280	18454	13733	7071	10881	6684	14902	19460	19416	50081	39211	39841	20782	30086	18688	9553	5290	4180	11078	17390	13893	36979	31397	23111	14630	37128	16776	50589	24983	42917
CNAG_06799	7110	6959	6707	5192	7649	5319	6361	6044	8011	4500	3795	3494	7487	9266	6917	7068	5146	3986	6451	7050	7085	4452	4748	5293	5342	13000	6673	5281	4105	4409
CNAG_06798	5242	5673	4962	4459	5084	4072	5153	4523	5978	4042	3443	3188	5461	7261	4968	5367	4285	3198	4861	4970	5223	4657	4160	6015	3861	9941	4642	5539	3372	3971
CNAG_06797	8927	7830	7925	10027	15086	10374	9622	9283	9767	15057	9354	12395	9034	11835	8402	13518	11005	8941	7047	7744	8497	7854	9204	10355	7193	17830	8294	12982	12550	12787
CNAG_06796	4515	3985	4028	3476	5762	3832	3510	3720	5035	3670	2811	2557	5011	5676	4483	5439	3582	3121	3623	3997	4317	2717	3138	2952	3148	8086	4279	3749	3629	3591
CNAG_06795	32308	30515	29248	8329	9093	8130	36224	28536	28208	3257	1990	3769	33270	58961	33130	9138	8957	6766	22956	24392	21728	2352	3138	3879	17478	37806	20415	2356	3136	2104
CNAG_06794	4590	5355	4551	5124	7835	5515	5493	5106	5917	5259	4432	5243	5539	8720	5276	6608	6201	4457	4260	5770	4868	3851	4474	4728	3899	9161	4549	5168	4334	4568
CNAG_06793	3124	2849	2560	4065	4597	3886	3621	3402	4094	4363	2940	3882	3062	3989	2735	4242	3595	3554	2504	3217	3152	2543	3826	2945	2718	7139	3445	4205	3760	4059
CNAG_06792	7354	7400	6672	6237	9459	6183	9423	9131	8947	6761	4228	6651	9099	13942	8705	8317	7215	4910	6160	7430	6590	4849	5118	5629	6069	15195	6874	6263	5446	5434
CNAG_06791	10329	11405	9853	8608	15545	9522	8740	11007	17175	18945	18577	13180	13862	15569	13778	13081	8155	7554	10924	15913	12303	17558	18592	11378	11968	27601	13266	24643	14318	21753
CNAG_06790	16379	16731	15399	12513	19089	12683	18525	19226	19874	26748	17145	22644	19750	26684	18025	18530	14190	9818	14413	16351	16782	13696	14852	16356	13990	36314	16988	24138	19981	22790
CNAG_07460	5392	5304	5093	6984	9619	6873	5093	5201	5506	7545	4862	5754	6134	7968	5611	9351	7660	5000	4511	5142	5352	5994	6548	7025	4121	10574	5210	6707	6248	5714
CNAG_06787	271	235	238	291	506	392	241	184	395	545	430	376	266	406	254	491	340	309	249	302	292	274	291	397	216	576	268	574	472	517
CNAG_06786	2059	1987	1829	2156	3250	2267	2239	2282	2916	2793	2062	2387	2318	3016	2278	2926	2300	1747	1963	2415	2238	1517	1900	2198	1888	4368	2201	2594	2898	2292
CNAG_06785	2664	2493	2286	4951	7800	5217	1344	2144	1947	1111	956	823	3703	3717	3875	6486	5328	4075	1729	2227	2106	1804	2342	2203	1366	3587	1797	1204	1157	1022
CNAG_06784	23516	21377	20671	23553	29741	22439	23117	27153	30001	20534	15232	17104	28812	37055	29301	29646	23829	18257	18385	25005	21994	13114	14963	17093	20515	50324	23480	19599	18633	17400
CNAG_12129	412	496	460	490	589	472	669	554	753	647	571	507	528	729	602	590	505	326	451	705	596	407	451	517	503	1129	463	573	505	486
CNAG_06783	80	90	81	72	64	47	159	91	139	173	96	132	85	154	83	107	88	59	60	111	101	43	57	65	97	202	92	84	87	88
CNAG_06782	16949	17258	15369	8345	13399	8529	17690	18842	21322	13727	10214	11288	22715	28567	22253	11613	9195	6575	14889	20616	18692	9523	10501	9380	15576	39669	17799	13542	10407	11825
CNAG_06781	3709	3841	3428	2841	5101	3201	2527	2631	4095	4777	4638	3870	4160	4552	4160	3958	3100	2788	2944	4275	3371	3879	3933	3436	3179	6889	3332	6133	4174	5176
CNAG_07461	7	12	8	20	16	27	18	1	3	23	18	4	10	23	10	16	13	14	16	13	11	15	7	22	4	36	8	12	15	14
CNAG_06780	15711	14294	13481	14730	19206	14758	16699	19255	20340	14258	10455	12102	19553	25115	20529	19185	16007	12065	12175	16393	15478	8727	9793	10955	14033	34769	15827	12987	12816	12117
CNAG_12130	388	350	277	593	818	621	312	254	433	284	368	387	374	474	301	756	537	556	310	275	197	339	328	336	227	441	207	370	334	333
CNAG_06779	8650	9532	7289	4705	6521	4573	16023	11569	12073	5860	3998	5445	8675	16095	8932	5370	5968	3974	9198	11998	8967	2926	3584	4937	7932	18693	8678	4592	4213	4027
CNAG_06778	8485	7670	7628	5943	9176	6156	12143	9694	9323	9371	5647	7978	8621	12427	8078	8424	6477	4823	7082	7548	8869	4771	5080	6348	6580	17523	8363	8314	7391	7937
CNAG_06777	965	1060	906	1116	1626	1004	1997	2273	2655	552	442	429	1350	1739	1462	1203	1045	840	1488	1676	1652	575	831	850	1649	4232	2077	578	639	502
CNAG_06776	619	577	571	960	1415	951	1200	1218	1410	1253	1055	1059	736	965	678	1110	861	757	633	905	855	705	926	936	748	2243	1042	1552	1124	1054
CNAG_06775	7725	8689	7491	5853	7873	5864	9988	9368	8415	5637	3591	5549	9213	13582	8162	7778	7008	4374	7003	7489	7504	4171	4742	5248	5507	14440	6807	4587	4166	4430
CNAG_06774	1479	1382	1390	1287	1499	1295	1455	1039	1679	913	947	678	1435	1900	1329	1627	1037	865	1337	1285	1421	977	1004	1254	1201	2428	1330	1308	793	998
CNAG_07462	159	180	161	322	416	303	260	174	199	308	195	351	200	334	199	363	322	189	155	147	167	230	210	284	137	317	118	306	236	217
CNAG_06773	34047	31876	29785	17508	26691	19643	29057	29745	34858	14954	10335	12344	38226	45183	34692	26703	19464	15205	28914	29315	31243	11833	14415	16999	24727	64842	31199	14553	15709	13910
CNAG_06772	5601	4927	4768	3648	5586	3477	5692	5412	5308	3255	2161	2924	6287	8638	5699	5287	4188	2831	4381	4717	4377	2386	2722	2877	3478	8822	4225	3177	2675	2911
CNAG_10020	0	2	0	0	0	0	0	0	0	0	2	0	0	1	8	0	2	0	0	0	0	1	0	0	0	2	0	0	0	2
CNAG_06771	1445	1841	1505	2572	4468	2998	1875	2105	2110	8487	6139	7494	2191	3089	1966	4388	3464	2360	1396	1733	1645	4519	4836	4233	1522	4023	1993	7758	5524	7100
CNAG_06770	121368	125924	113969	95620	166336	109317	95589	90639	133212	152395	121699	121329	149766	179216	130490	156775	102800	82586	107409	116129	121115	117397	129379	116673	94062	224976	116289	157010	133355	152073
CNAG_06769	5257	4883	4670	4411	7386	4768	4443	4346	6067	5690	4076	3891	6367	6928	5613	6785	4797	3746	4428	5137	5143	3881	4494	4422	3983	10436	5227	6055	5158	5658
CNAG_06767	19916	18826	17094	9637	17748	13074	12753	11480	23431	6068	6114	3763	21270	20917	20093	15744	9305	10294	19588	19328	20121	6002	7758	8547	15921	35078	19646	8293	8574	6581
CNAG_06766	5919	6227	5689	5764	6454	5168	6577	5588	6666	5818	4446	4544	5944	8248	5625	6780	5345	3396	5218	5522	6050	6627	5275	7979	4426	11591	5324	7544	3940	5641
CNAG_12131	61	77	64	310	475	383	78	105	108	161	111	118	88	129	71	404	370	302	102	131	97	150	160	226	55	198	84	125	150	132
CNAG_12132	90	98	63	172	174	149	152	131	131	208	152	149	121	134	113	229	144	130	131	208	147	134	161	193	100	221	115	250	193	179
CNAG_07962	430	417	346	1361	2330	1504	598	633	815	1214	1255	1001	570	713	528	2016	1314	1479	730	895	502	1022	1187	1298	536	1010	571	1654	1469	1355
CNAG_12133	27	32	29	28	17	29	15	59	29	13	0	20	32	66	27	9	31	25	23	36	33	4	30	10	15	37	27	8	5	17
CNAG_06765	10322	9141	8875	14028	22262	15056	10762	11847	10817	13395	8030	10936	11981	15338	10521	20993	16807	11457	7931	8995	8610	11014	12884	12808	7066	18481	8820	11814	11830	10739
CNAG_06764	8133	6678	6444	3851	6262	4404	10003	8078	12760	5272	4032	4185	7970	9397	7528	5597	4007	3445	7801	8581	8404	2616	3570	4798	8119	19408	9858	5483	6689	4733
CNAG_06763	2668	3075	2433	3330	5884	3659	3188	2851	3325	3354	2443	3457	2948	4376	2938	4756	4017	2705	2568	3182	2918	2283	2692	3239	2207	5664	2580	3193	3022	2791
CNAG_12134	657	940	638	931	1132	783	1222	1021	1098	1110	897	1152	638	1203	708	896	931	664	751	1102	833	572	647	890	688	1403	684	1252	926	952
CNAG_06762	5900	6103	5272	17351	23035	15697	4227	4658	4746	8101	6298	6492	7338	9491	6630	21974	17529	11346	4921	5880	5358	13586	14767	14270	3130	8151	3608	9035	6335	7927
CNAG_06761	540	534	423	371	427	428	375	381	565	193	194	162	634	833	711	500	342	294	408	523	472	284	343	505	392	925	370	311	153	203
CNAG_06760	1866	1609	1526	4130	5789	4629	2037	1835	1942	2301	1657	1790	2355	2958	2105	5906	4693	3388	1537	1899	1671	2474	2951	3401	1224	3158	1512	2399	2354	1712
CNAG_12135	399	496	460	777	1108	793	470	642	601	1673	1085	1398	780	948	650	1051	880	657	322	436	358	833	980	962	369	756	395	1783	902	1429
CNAG_06759	7612	8484	7379	2991	5884	4021	4847	5379	7668	13148	10802	10181	10833	11915	9148	5019	3319	2682	5733	7693	7090	8485	7798	5989	5318	12885	6404	15457	10129	14553
CNAG_06758	2201	2050	1858	1078	733	835	1615	1645	2182	597	738	362	2140	2599	2112	972	639	508	1798	1723	1480	1126	850	1668	1101	2813	1463	1829	602	942
CNAG_12136	20	30	13	23	20	23	17	7	5	30	47	32	35	34	14	17	20	8	22	17	9	40	29	28	5	18	7	48	11	22
CNAG_06757	2550	2462	2329	1855	2654	2033	2078	1759	2870	2461	2175	2034	3197	3754	2985	2347	1652	1345	2184	2888	2345	1938	2034	2497	1924	4266	2152	3165	2456	2413
CNAG_06756	2089	2677	2001	3056	4319	3293	3051	2196	2956	2070	1670	1534	2444	3905	2293	3894	3129	2264	2388	3141	2507	2334	2816	2749	1902	4226	2236	2160	1617	1733
CNAG_12137	128	90	72	218	330	201	131	119	208	278	227	218	88	154	132	244	173	221	124	175	93	140	166	153	127	244	100	246	178	195
CNAG_06755	20051	18357	18433	5559	9829	7119	13013	11857	20633	4393	3716	2904	21522	21429	18633	9344	5685	5630	17867	18010	19706	4433	5213	5777	13792	33932	17809	5827	5286	5002
CNAG_06754	21516	20764	19610	13230	19465	13322	21932	21221	23880	16127	9702	14667	23661	30948	22038	18028	14510	10779	18031	19723	20603	9978	11372	13680	17076	41313	19903	14678	14399	13768
CNAG_06753	13677	11353	11110	11185	19556	13664	10818	9744	15827	9229	7462	6718	14014	14615	13049	17980	11809	11343	11711	13174	13067	8514	10869	10540	10728	25619	13097	10027	10794	9063
CNAG_12138	129	134	111	64	125	79	112	118	180	86	88	70	115	277	142	124	84	54	156	221	127	52	63	75	121	230	114	107	55	41
CNAG_06752	1352	1355	1350	3396	4629	3313	887	996	1418	2533	2106	1785	1573	1723	1507	4548	3102	2385	1296	1376	1208	3048	2980	2813	999	2141	1117	3355	2475	2785
CNAG_06751	4436	4358	4133	8292	11116	7831	5142	4581	4236	9783	6466	7950	4689	6469	4180	11239	9600	5653	3426	3903	4114	8411	8400	11430	2732	7336	3659	11885	8555	8947
CNAG_06750	2506	2329	2198	2973	4462	2621	2474	2352	3194	4782	3479	3814	3188	3662	2796	3976	2951	2412	2232	2582	2421	3356	3310	2662	2041	5270	2445	5276	3412	4572
CNAG_12139	152	192	132	63	76	77	247	176	261	60	51	41	168	235	136	49	64	50	153	256	178	29	44	39	98	253	182	44	59	59
CNAG_12140	7	5	4	13	26	16	13	12	13	10	9	8	7	10	7	21	17	10	3	6	4	5	5	6	1	10	3	7	20	10
CNAG_06749	20908	19363	18979	20406	24701	18753	20356	23189	24719	17036	12012	14691	23679	33028	24177	25444	20831	15045	16104	20354	19270	12079	13273	15230	16603	41271	18881	15885	14656	13782
CNAG_06748	6346	7068	6025	7364	8637	7158	6748	6336	7456	4424	3771	3574	7643	9621	7153	9199	7700	5544	6442	6956	7014	6355	6128	6888	5020	12274	6009	5720	3506	4173
CNAG_06747	22215	18761	17105	28806	36967	24625	9260	10969	19048	28153	31594	19044	19873	17604	18676	33473	21517	22925	17678	17184	18398	21995	26375	18564	13805	28070	15028	43050	22571	28683
CNAG_06746	27601	23934	20497	33615	38368	25817	19618	22173	21261	36710	27707	30559	24500	31276	21883	37681	30316	23335	19400	19452	20473	24212	26908	23408	15141	33476	17685	41183	22442	27612
CNAG_12141	370	419	262	802	890	734	406	451	594	1213	1141	1230	359	589	385	935	761	596	521	523	355	668	727	586	292	589	334	1221	654	1000
CNAG_06745	17316	14930	12054	23047	21421	13891	6431	8121	11056	29446	30193	20801	13872	13118	13048	20475	14688	15157	11568	12578	12570	15091	18778	13952	9417	17527	9389	41675	17102	23459
CNAG_06744	3684	3692	3179	2665	3990	2668	5006	4224	4500	2837	1861	2735	4091	5464	3808	3636	3133	2171	3219	3700	3793	1750	2019	2472	2678	7388	3746	2612	2757	2339
CNAG_06743	1024	1058	847	251	459	357	1440	1409	2241	280	259	213	1256	1490	1082	327	283	217	1334	1517	1382	123	137	263	1630	3253	1657	244	417	221
CNAG_06742	5289	5523	4681	6747	8133	6656	4947	4492	7267	4507	4684	2936	5429	6482	5285	8356	5490	4611	6017	6233	5588	6632	6700	6398	4494	10684	5340	7526	4259	5021
CNAG_06741	3702	3898	3370	4372	4702	4149	3683	2875	4213	3052	2933	2052	3720	4774	3302	5202	3904	2550	3569	3205	3386	5122	4575	5815	2592	6419	3040	5098	2546	3374
CNAG_06740	11083	9961	9469	7550	12497	8000	10916	11202	11930	8531	5753	7081	12463	16477	11217	11575	8590	6607	8926	9273	10049	6657	7227	7460	7961	20598	9973	7714	7691	7769
CNAG_06739	14197	11811	12079	5289	7136	5511	9165	8922	12461	3257	3037	2002	13547	15017	12687	7570	4866	4190	10824	10590	11278	4397	4620	4577	8234	21031	11058	4638	3536	3552
CNAG_06738	8561	8874	7482	8215	13677	9184	8984	9097	10408	13283	9332	10681	10273	13199	9211	12369	9411	6695	7333	9046	8414	9413	10228	9572	7133	18265	8580	12475	10493	11628
CNAG_06737	7039	6571	6542	5507	10254	6547	5488	5809	8520	9127	7894	6670	8503	8903	8321	8938	5609	4989	6184	7403	6781	8116	8034	6007	5852	14235	7016	11388	8006	10142
CNAG_07463	8045	5430	5743	3564	4538	3689	9433	4807	9192	2944	2760	1974	4873	6644	5037	4755	3405	3762	6012	6437	5487	2120	2884	2482	5005	12210	6115	3568	3430	3595
CNAG_06734	1509	1543	1415	921	1405	1011	1661	1485	2561	681	730	599	1699	2326	1630	1181	825	798	1754	2396	1626	559	714	743	1542	3367	1558	1007	817	724
CNAG_06733	4018	4564	3915	3025	4825	3266	4681	5003	5283	6592	4701	5687	5229	6818	4761	4244	3146	2288	3969	4965	4952	4395	4123	4386	3726	9725	4400	6166	4902	5487
CNAG_06732	14882	13519	14000	11555	18740	12473	12833	15648	18118	26703	20068	19007	18407	20953	16950	17685	12031	9204	12130	14104	14744	18878	19702	14134	12441	32294	15452	29096	19623	28501
CNAG_06731	31	45	22	16	19	35	24	20	38	26	27	36	48	60	27	34	48	13	34	10	28	55	33	20	18	37	28	25	32	31
CNAG_12142	21	21	23	44	40	51	58	29	44	61	66	37	30	49	40	54	60	38	36	37	14	42	56	45	27	51	28	55	52	58
CNAG_06730	27420	26289	24721	32187	53878	35176	27683	27920	28818	37315	24382	30974	32633	42019	28835	49782	38251	27796	21857	23792	25003	28655	32308	32083	19502	49543	24578	34391	31390	33830
CNAG_06729	2094	1866	1750	1613	2455	1611	2075	2054	2364	821	584	673	2302	2974	2122	2087	1723	1274	2147	2217	1909	927	1230	799	1491	3729	1958	810	693	690
CNAG_06728	10473	10758	9910	3057	4908	3366	13799	11997	17033	2593	1942	2115	12903	16509	11988	4321	3169	2579	10926	14638	12507	1744	2119	2592	10488	28540	13702	2781	3120	2493
CNAG_06727	3152	2908	2834	3232	5339	3919	3216	3225	3580	6235	4152	4678	3713	4568	3445	4865	3717	2651	2785	2912	2992	4595	4547	4222	2466	5767	3028	5754	4790	5743
CNAG_10021	0	0	0	0	0	0	2	0	2	1	3	0	0	5	0	2	1	1	0	1	1	0	0	0	1	0	0	1	0	1
CNAG_07963	140	128	133	78	175	155	154	152	300	174	165	110	145	181	169	214	87	134	179	285	153	68	100	107	168	330	177	229	218	161
CNAG_12143	10	11	15	16	7	11	15	5	23	10	6	11	10	12	17	22	0	16	13	18	6	7	10	7	8	25	6	6	6	5
CNAG_06726	5460	4703	4952	2666	4078	2593	7965	6751	6409	6105	3337	5133	5994	8605	5679	3673	3113	1821	4051	4691	4608	3007	3110	3622	4483	10852	5358	4852	4380	4554
CNAG_06725	2313	2064	1935	2693	3896	2874	2173	1842	2893	2022	1564	1905	2495	2829	2109	3625	2884	2190	1942	2488	2384	1832	2025	2088	1982	4800	2445	2147	1881	1885
CNAG_06724	2200	1734	1777	1521	1769	1271	2701	2420	2712	1731	1082	1525	2024	2840	2016	1778	1227	914	1655	1916	1942	961	1098	1088	1588	4174	2175	1616	1316	1442
CNAG_06723	17681	17609	15975	21190	31873	22410	17867	18541	22051	17458	13931	13130	21684	28014	20627	28645	21036	17484	18529	20007	18285	13555	15952	18948	13823	33981	17759	18095	17339	15530
CNAG_06722	1247	1498	1202	2718	3216	2115	1310	1552	1629	3014	2572	2334	1622	2180	1688	2898	2182	1647	1460	1414	1421	2969	3003	2178	1194	2873	1432	3999	2052	3038
CNAG_07464	7922	8164	7173	3132	4338	3262	10653	8980	11147	3414	2421	2786	8782	11607	8426	4145	3062	2713	7982	9632	9266	2027	2440	2979	7015	18321	8976	3305	3407	3274
CNAG_07465	1768	2068	1710	1900	2896	1942	2218	1836	2863	1459	1204	1329	1903	2949	2272	2418	2092	1473	2065	2731	2072	1272	1558	1516	1538	3990	1977	1607	1269	1343
CNAG_12144	14	16	6	12	24	14	39	39	42	24	26	10	24	22	30	26	18	29	23	51	22	9	12	11	29	25	23	29	8	21
CNAG_06719	1492	1653	1346	3120	5000	3373	1580	1343	1817	3163	2638	2556	1997	2356	1836	4544	3428	2587	1345	1782	1689	2944	3508	3106	1203	3094	1643	3678	3079	3504
CNAG_06718	385	314	288	139	189	169	97	164	154	158	105	129	561	755	452	174	136	108	164	159	174	91	105	122	102	220	106	114	80	108
CNAG_06717	6610	5948	5549	3522	4835	3595	6521	5858	7219	2916	2008	2359	7323	9611	6696	4642	3582	2720	6052	6339	6356	2240	2726	2943	4774	12431	6489	2764	2694	2285
CNAG_06716	7691	8599	7278	4930	7128	5015	6916	6470	9870	4213	3586	3448	9281	11739	8938	6329	4725	4130	7488	10741	8229	3127	3823	4280	6659	15563	6996	4459	4214	3967
CNAG_06715	0	0	0	0	0	0	0	0	0	0	0	0	0	0	0	0	0	0	0	0	0	0	0	0	0	0	0	0	0	0
CNAG_06714	5194	5197	4647	2628	3718	3298	4175	3212	6085	2247	1902	1598	5189	6426	4238	3124	2555	2317	4155	6736	5042	1548	2339	1987	3769	10374	4114	2319	2375	1874
CNAG_06713	7874	7570	7247	4969	7227	5420	8192	6749	8686	3885	2796	3290	8462	11096	7727	7327	5035	4275	6772	7277	7832	3312	3774	4442	5959	15314	7614	3961	3958	3726
CNAG_06712	8725	9247	8117	11354	19647	12695	6666	7145	12701	15900	17470	12622	11633	13137	11116	15551	11183	10181	8670	12227	9473	13091	13828	11892	7755	19035	9681	19356	15621	17481
CNAG_06711	3190	3228	2759	2152	3573	2247	3980	2986	3566	2943	2025	2345	3430	5067	3261	3051	2666	1882	2676	3490	3199	1902	2058	2124	2308	6052	3050	2581	2286	2274
CNAG_06710	6341	7273	6299	3646	6180	4061	7867	7014	10709	4798	3804	3959	8281	11013	8432	5281	3991	3316	7892	9924	8176	2762	3553	4027	6650	15162	7276	5084	4257	4343
CNAG_06709	4895	4773	4662	4648	7524	4906	4944	5158	6024	5860	3881	4881	5846	7435	5459	7269	5212	4074	4104	5105	4886	3631	4553	4754	3931	10425	5119	5470	5440	5232
CNAG_06708	1241	1270	1079	437	539	455	1747	979	1915	310	242	204	1265	1594	1192	533	382	364	1169	1602	1510	248	313	391	1112	2761	1556	268	288	308
CNAG_06707	575	472	429	279	299	318	847	390	1116	253	232	177	557	718	646	318	236	341	691	1102	595	118	119	231	616	1337	610	323	230	174
CNAG_06706	1362	1569	1352	5387	9145	6168	1686	2056	2256	5390	5067	4851	1761	2151	1805	8226	6252	5025	1627	2048	1646	4120	4887	6150	1547	3175	1601	7037	6121	4744
CNAG_06705	899	911	765	786	1188	841	1267	1113	1668	2326	1887	1945	1108	1491	1123	985	693	629	1160	1559	961	1024	1156	1313	971	2369	1089	2894	2004	2408
CNAG_06704	1242	1404	1173	1222	2365	1370	1421	1441	2187	2137	2265	1999	1769	2052	1665	1683	1388	1254	1450	2119	1527	1393	1667	1703	1280	2798	1557	3077	2434	2762
CNAG_06703	15751	14061	13963	14201	19147	14034	15029	16442	19166	12340	9772	10328	18731	22878	17900	18881	14460	12149	12891	16012	14178	8692	9993	10409	13056	30600	14507	12621	12049	10562
CNAG_07466	566077	396913	347161	245802	216289	255131	259475	190788	479474	145487	165003	121082	473271	624476	514266	180043	65218	104732	592540	434959	379731	162974	209149	233773	528355	533164	620094	347532	218874	165764
CNAG_10500	3744680	2604899	2252292	1678245	1387139	1680730	2188294	1537261	3250868	1256025	1020400	1001190	3061838	4839863	3318003	1189719	468366	651485	3918221	2814147	2568130	1077365	1408189	1871597	3577007	3846465	4056905	2229923	1552275	1071560
CNAG_12145	0	0	0	0	0	0	0	0	0	0	0	0	0	0	0	0	0	0	0	0	0	0	0	0	0	0	0	0	0	0
CNAG_10501	36308	38917	28002	4075	6994	4387	24747	27519	41172	4286	3330	3576	35017	40846	33759	5292	3426	4339	38427	35037	31467	2923	3656	5787	23064	50665	27739	5119	5487	3774
CNAG_10502	3304367	2905156	2472563	2165571	2767784	2286376	2006396	1750924	3210013	2493941	2324367	2009053	3417358	4525902	3501887	2476130	1590248	1502436	2758016	3037991	2542749	1878984	2018282	2489750	2437344	4388621	2801179	3595848	2644029	2730800
CNAG_10503	20	92	28	20	22	28	43	11	58	42	30	39	40	31	37	28	20	14	30	32	19	23	20	18	19	44	39	34	21	20
CNAG_03595	7730	6261	6038	6954	11239	8276	7848	5536	10259	14728	12617	10186	7290	8311	6933	10830	6626	5708	5727	7197	6794	16312	14360	9360	6643	15908	7949	18433	8625	17558
CNAG_03596	29437	28144	27079	28755	48292	35361	20227	19654	35072	28316	26704	19948	35318	36159	32724	44235	27629	25951	26669	31372	28807	29934	34348	28025	23364	55369	28474	36717	26839	32170
CNAG_12146	34	150	45	239	579	328	106	90	118	245	225	248	102	121	57	349	330	522	205	88	86	216	317	174	68	100	65	319	141	234
CNAG_03597	571	732	530	964	1388	1165	805	719	946	1319	1058	1028	777	1056	824	1274	1046	974	836	898	647	786	1048	917	543	1338	556	1565	1066	1282
CNAG_03598	13333	12254	11791	8833	15389	10587	9866	9653	14393	8895	7070	6484	15238	16403	14467	14027	9083	7915	10680	12454	12274	8264	9050	8401	9596	23868	12239	9662	8438	9042
CNAG_03599	1877	1513	1552	9143	15998	10035	1929	2096	3106	4532	3630	3568	1820	2202	2000	14792	9576	8217	1811	1937	1883	5039	6457	5729	2082	4812	2517	4745	4993	4421
CNAG_03600	2459	2145	2252	4349	6509	4462	1907	2763	3232	7589	5993	5057	3376	3825	3313	6273	4394	3424	2042	2572	2319	4913	5517	4639	2043	5272	2721	7072	5540	6727
CNAG_07964	4332	3260	2836	3120	3113	2552	4397	3223	4769	2364	1794	1792	3605	4241	3471	3249	2393	2349	2956	3900	3739	1852	1890	2400	3091	8151	4244	3004	2206	2182
CNAG_03602	16230	17386	15582	19343	21870	17931	16599	12591	16155	12788	10216	10157	17479	23460	16436	24057	18197	11937	13826	14767	14254	17315	16632	21081	10383	26496	13589	15443	11159	11413
CNAG_03603	3429	3797	3339	3596	4243	3671	2933	2506	3812	1993	2037	1345	3682	4540	3285	5025	3473	2265	3230	3103	3281	3804	3874	3967	2453	5878	3115	3735	1752	2242
CNAG_03604	4241	4681	3873	3324	4561	3344	5594	4740	5290	2969	1995	2511	4855	7676	4762	4070	3486	2451	3946	5075	4427	2436	2987	3066	3438	8651	4129	2752	2142	2149
CNAG_03605	3256	3065	2985	5753	9127	5985	3016	2949	3572	2252	1685	1723	3942	4833	3465	7905	6640	4580	2679	3261	3003	3648	4509	3933	2218	5859	2892	2112	1957	1848
CNAG_03606	31681	28197	27279	19889	30328	21533	23413	23504	33813	14590	11999	11033	31095	34601	29341	29960	20030	16998	26393	27181	28925	16377	16973	17343	22395	57366	28556	17796	13473	14950
CNAG_03607	2689	2339	2342	2687	3693	2612	2622	2655	2696	1954	1418	1817	3230	3822	2904	3497	2575	1910	1990	2118	2348	1681	1747	1767	1812	4592	2392	1999	1946	1925
CNAG_03608	1206	1191	966	1053	1556	1019	1490	1509	1366	1309	781	1270	1369	1798	1248	1477	1142	792	1008	1123	1172	678	974	1080	928	2672	1160	1139	1161	1077
CNAG_03609	4664	5019	4845	2914	5432	3433	3892	5009	5354	6542	4946	5186	7114	8663	6301	5027	3483	2390	4246	4905	5155	4366	4532	3661	3701	9766	4656	6921	4989	6372
CNAG_03610	5984	5299	5304	5299	8634	5903	5184	5968	7460	4924	3877	4603	7008	8890	6914	7948	5851	4618	4940	6083	5751	4494	5103	4713	4610	11930	6030	5314	4756	4396
CNAG_07469	14804	13078	13355	8338	13623	9646	14418	14087	18068	10300	7315	8054	16680	19799	14876	13011	9450	7970	12960	13892	14183	6740	8256	8532	11860	30797	15606	9676	9966	9858
CNAG_12147	35	39	39	61	54	41	27	39	46	55	24	56	37	61	33	57	62	37	28	25	32	18	36	25	26	65	21	34	26	37
CNAG_03612	26615	26080	23740	9690	15666	10619	19408	20721	27647	9003	6901	6392	30732	33148	27440	14308	9463	8112	23667	24436	25855	7596	8377	9241	18469	46709	23311	9635	9302	9120
CNAG_03613	1107	1182	1091	1588	2006	1279	1577	1468	1548	2035	1345	1723	1219	1976	1310	2102	1673	1144	952	1164	1304	1190	1404	1376	1070	2850	1261	1611	1619	1503
CNAG_03614	192	166	194	282	409	313	134	134	223	140	88	65	262	328	323	351	236	229	152	208	186	118	162	138	146	407	224	132	119	112
CNAG_07470	5983	6075	5632	8240	11618	8015	3278	3775	4295	4635	3456	3704	7171	8618	6592	11216	7682	6336	4389	5046	4894	9146	9099	9064	3100	7291	3514	5242	3645	4693
CNAG_12148	105	159	127	336	455	284	137	297	174	737	514	676	168	283	161	432	315	211	117	148	129	289	340	298	104	325	136	632	508	691
CNAG_03617	7	2	4	8	22	9	7	7	15	33	33	15	6	8	13	15	13	12	4	2	7	6	18	17	12	29	9	29	15	49
CNAG_03618	3363	2979	3210	6301	11389	8326	2049	3070	4086	3805	3332	2889	4385	4524	4126	10502	6777	6018	3066	3425	3642	4381	5136	5137	3205	7510	3803	4492	4509	4245
CNAG_03619	1975	1737	1738	1297	1992	1341	2537	2475	2839	2007	1589	1759	2322	3202	2298	1827	1319	1090	1713	2060	2092	958	1175	1395	1795	4720	2309	2150	1831	1983
CNAG_03620	6896	6170	6024	3946	6530	4557	6623	6135	7970	4888	3275	4134	7716	9871	6920	5935	4689	3421	5405	6152	6493	2972	3313	4438	5334	13189	6523	4843	4888	4091
CNAG_03621	54700	52491	48924	22908	39485	29130	43863	41415	65965	22424	18975	16493	63253	74280	61440	35440	24194	21470	53124	59590	61234	16986	20176	22375	42661	104872	52670	23301	20426	21761
CNAG_03622	10109	7734	8143	9132	14737	10331	9858	8819	13178	9035	7103	6616	10801	10726	9593	13821	8565	8409	8909	10140	10273	7581	8917	8816	8791	22073	11229	10376	10800	10164
CNAG_03623	3657	3580	3492	6454	13484	8669	3496	3807	7786	4505	4979	3153	4676	4316	4322	10733	5763	6965	5192	6126	5507	4513	5846	5528	5053	11333	6214	5692	7292	4913
CNAG_03624	5023	5296	4464	4995	4992	5251	4730	3181	5224	2759	2898	1533	4839	6314	4438	6323	4314	3097	4825	4306	4392	5215	5128	5798	3189	8212	4319	5112	2350	3115
CNAG_03625	3545	3458	3369	4975	8185	5952	3353	3709	4401	5955	4007	5101	4451	5431	4143	7682	5702	4136	3178	3791	3677	4471	5014	5293	3151	7731	3882	5955	5523	5519
CNAG_03626	11614	11324	11109	6107	10898	7260	10500	11508	13799	7965	5673	6156	14313	16558	13467	10024	6689	5515	10207	11449	12424	5304	6366	7043	9576	24401	12009	7726	8040	7923
CNAG_03627	99384	109210	100405	41218	70336	52020	80899	90723	134999	47632	39952	33580	135452	148764	130275	66187	42111	38222	105523	121858	119690	32449	40106	45224	87243	220890	108636	50565	43295	45869
CNAG_03628	7926	7694	6974	6114	10552	6575	6199	6974	7875	8371	5777	7078	9388	11856	8687	9416	6868	4968	5898	7007	7455	6146	6610	5939	5518	14633	6779	8283	6425	7855
CNAG_03629	56708	46153	47995	27898	46408	32697	37930	40119	61307	18191	16296	12591	61192	62275	55717	44749	26181	26562	49607	47431	52177	19854	24570	23042	40504	96292	53137	22771	23535	20372
CNAG_03630	749	819	722	557	822	669	741	643	841	790	592	635	714	1113	866	660	741	493	688	734	583	473	530	516	547	1141	574	654	512	549
CNAG_03631	5661	6474	5459	3180	5422	3381	4483	5133	5900	6412	4858	5441	8213	10738	7459	4501	3372	2410	5057	6942	6034	5645	5278	4510	4224	10964	5017	6940	4586	6181
CNAG_03632	3513	4000	3105	1621	2586	1609	2470	1953	3958	2165	2238	1890	3918	4726	3674	1936	1498	1495	3478	5002	3514	1542	1654	1604	2611	5143	2685	2860	1983	2355
CNAG_03633	2078	1542	1605	2522	4177	2788	2246	1806	2247	2830	1679	2290	1878	2349	1707	3815	2779	2435	1457	1648	1851	2015	2254	2254	1575	4068	1967	2675	2640	2662
CNAG_03634	2447	2475	2578	1622	1997	1728	2480	1969	3040	1726	1589	1300	2532	3280	2256	2240	1534	1125	2408	2217	2488	1581	1695	2032	1963	4740	2442	2458	1465	1934
CNAG_03635	161	194	215	245	446	296	324	190	230	432	209	262	205	334	174	384	455	237	151	205	188	154	239	306	174	407	184	290	304	239
CNAG_03636	2299	2461	2154	2092	3098	2545	2166	2006	3692	1520	1630	1200	2462	3239	2566	2994	1823	1925	3287	3638	2826	1751	2179	2017	2262	5123	2663	2241	1474	1494
CNAG_03637	4027	3481	3614	4747	8224	5168	4860	4709	5197	9229	6184	7819	4741	6020	4458	7089	5140	3801	3094	4109	4375	6358	6563	5468	3447	9506	4364	8587	6819	9006
CNAG_03638	16186	14363	14136	18056	32747	21849	11957	14677	17297	20181	15333	15254	18718	21657	18334	30581	20661	16587	13037	14265	15173	19109	20243	17632	11962	30357	14943	22101	18990	20667
CNAG_03639	1702	1785	1607	1852	3422	1971	1939	2143	1938	2739	1967	2583	2174	3123	2141	3026	2517	1576	1478	1854	1856	1852	2213	2132	1193	3629	1724	2403	2243	2215
CNAG_07471	358	372	324	858	1083	1073	651	526	517	764	674	751	457	637	464	1266	986	743	409	384	330	894	824	904	313	696	362	884	495	623
CNAG_03640	3980	4046	3405	2536	3761	2712	4624	3905	6152	2758	2173	2589	4676	6179	4599	3060	2615	2311	4286	6259	4378	1724	2177	2424	3947	9181	4175	2776	2590	2417
CNAG_07472	3306	3670	2944	2036	3221	2117	4136	3721	4810	2265	1813	2225	4097	6570	4105	2511	2283	1813	3091	5126	3513	1265	1691	1929	3064	6982	3250	2062	2317	1842
CNAG_03641	20616	18910	18700	11715	17221	13096	16299	16208	21100	10626	8126	8171	22429	25295	20258	17286	11929	10082	17569	17529	18815	9509	10192	11072	14430	34604	18785	12117	10558	10581
CNAG_03642	1166	1313	1166	2937	5113	3504	1622	1827	1674	5702	3825	4640	1562	2009	1466	4566	3590	2573	1228	1380	1347	2940	3322	3867	1163	2682	1223	5519	4677	5075
CNAG_03643	964	990	881	1796	3084	2077	1063	1166	1255	3148	2671	2518	1216	1495	1137	2888	1956	1520	1031	1102	1046	1728	2003	2600	837	1900	942	3579	3049	3087
CNAG_12149	28	47	29	73	48	57	96	83	84	91	73	105	40	57	39	65	34	48	71	63	36	60	54	32	54	134	57	70	31	56
CNAG_12150	31	83	26	93	145	78	70	143	123	137	115	94	57	81	55	139	90	124	147	65	53	138	137	63	61	148	59	135	51	101
CNAG_12151	63	71	36	71	126	84	131	95	115	104	66	47	50	104	79	136	89	84	112	95	101	38	58	79	62	150	70	110	68	58
CNAG_03644	534	527	547	2678	3672	2813	739	714	912	1999	1571	1897	640	790	630	3638	2719	2211	580	631	488	1749	2066	2033	507	1216	575	2273	1760	1852
CNAG_03645	17993	16170	15432	11260	14314	12083	14101	12448	18525	9465	9171	6213	17988	20385	16542	16414	10277	8119	14613	13704	14940	13708	10806	16775	11366	29196	15281	16352	8776	11030
CNAG_03646	4284	4732	4161	2447	3430	2632	4214	3839	6157	2191	1900	1563	5368	6502	5179	2954	2352	2068	4815	6433	5486	1817	2170	2328	4356	9679	4977	2918	2063	2086
CNAG_03647	2220	2090	2026	1158	1766	1230	1550	1809	2395	1092	849	697	2288	2726	2150	1588	1040	867	2103	2069	1948	1009	1136	1122	1639	3900	2144	1203	864	1103
CNAG_03648	20826	20333	19623	11476	20772	14109	19653	20481	28797	18334	15405	13325	26484	28764	24304	18756	11612	10505	20457	23353	24369	14659	16516	13315	19527	51846	25616	21724	17392	20259
CNAG_03649	2273	2109	1895	1603	2437	1655	2767	2961	3114	1146	942	925	2671	3666	2549	2270	1773	1430	2591	3183	2877	1453	1560	1326	2028	4739	2569	1149	910	998
CNAG_03650	4070	3844	3972	985	1436	1159	6254	10894	13741	5417	5250	4211	7128	7863	8245	1264	928	774	7804	10998	9190	2038	2166	2114	10870	24057	12483	5715	5069	4643
CNAG_03651	4743	5829	4482	4499	7999	5444	5992	5531	7185	4315	3677	4170	5935	9131	5891	6399	5036	4443	5056	8400	5635	3353	4135	4434	4433	10593	4901	4795	4007	3763
CNAG_03652	2778	3084	2372	1525	2288	1498	2605	2405	3864	1563	1393	1464	3375	4729	3364	1774	1384	1307	3214	4340	3135	1095	1254	1382	2774	5882	2852	1689	1570	1542
CNAG_03653	4076	4000	3783	2851	4324	3290	3378	3440	5031	2745	2120	2008	4451	5366	4193	4338	2799	2264	3719	4010	4319	2563	2736	3197	3410	8646	4274	3163	2671	2656
CNAG_12152	39	49	46	55	71	56	95	97	87	24	22	14	27	75	57	51	56	37	80	66	70	48	61	57	48	118	60	22	14	8
CNAG_03654	5487	5023	4674	2292	3233	2333	6154	5355	6410	2662	1830	2372	5681	7524	5427	3111	2185	1974	3837	4989	4720	1624	1680	1872	3945	10357	5091	2541	2295	2281
CNAG_03655	10602	7476	8076	5380	6778	5237	15878	8460	11506	3170	2024	2542	7006	9983	6786	6687	5074	5413	7946	8029	7574	2527	3153	3152	6768	15763	8124	2928	3188	2809
CNAG_03656	448	387	413	461	586	483	347	308	561	775	570	656	437	546	460	736	477	310	260	384	376	525	511	422	268	765	385	810	547	651
CNAG_03657	7940	6614	6681	4542	7531	4919	7559	6667	7594	5098	3534	4135	8233	10742	7778	6683	4734	3917	5596	6398	6426	3449	3834	4215	5238	13081	6381	5064	4940	4717
CNAG_03658	3790	3032	2759	2391	3126	2187	5438	3130	3765	2179	1458	1984	3072	4984	3127	2829	2440	2060	2428	2715	2215	1261	1594	1570	2079	4503	2536	1951	1577	2042
CNAG_03659	4068	3974	3864	3500	5854	3992	4883	4474	5633	5586	3589	4388	4514	5641	4209	5899	3919	3163	3616	4327	4560	3307	3568	3667	3528	9872	4842	5287	4754	5190
CNAG_03660	4701	5511	4509	4897	8137	5208	6407	5791	7205	6585	4794	5668	6084	8858	6134	6715	5240	4006	5281	7643	6106	3654	4368	4958	4910	12000	5685	6558	5739	5324
CNAG_03661	2025	2224	1775	2055	3662	2249	2365	2151	2510	1998	1217	1687	2681	3703	2565	2873	2285	1851	1806	2716	2265	1610	1911	1805	1764	3998	1901	1880	1561	1612
CNAG_03662	6151	6827	5830	5361	10136	6304	4429	4705	7963	3565	3952	2635	7510	8676	7517	7908	5509	5792	6398	9849	7317	3945	5145	4773	5404	12562	5866	5170	4429	4374
CNAG_03663	6403	5331	5081	8923	13143	10483	5611	5465	7136	3378	2632	2580	6066	7171	5655	12813	8790	8567	5384	5589	5566	6112	9208	6217	4658	11444	5773	3642	3651	2997
CNAG_03664	8172	8485	8330	14663	27431	16821	6395	7871	12240	21518	19376	17441	11836	12419	11176	23104	15145	14248	8391	10784	9911	14901	18519	16286	8262	19357	10073	23212	23726	21154
CNAG_03665	6492	5855	5676	4884	8427	5949	5731	5188	8098	4323	3275	3149	7132	7468	6742	7751	5092	4581	5752	6599	6561	3739	4179	4632	5057	12879	6724	4904	5058	4148
CNAG_03666	4102	4526	3974	48310	91860	61528	5276	5050	8465	38705	31647	31794	6098	6705	5946	77416	54628	49019	4110	5641	5192	34043	43121	45537	5106	13767	6866	39884	47290	37517
CNAG_03667	23175	24332	22212	32508	58321	34555	19513	22869	30176	106632	82165	84050	30169	36210	27778	49638	34981	26897	17224	22851	21283	75062	70389	55992	21368	54750	25084	110204	69761	104215
CNAG_03668	3906	3812	3422	13562	23170	14836	6123	6718	6335	15459	11305	13745	4846	7081	4478	20616	16403	12234	3916	4296	4377	15023	17193	13577	3879	9405	4885	14017	11412	12741
CNAG_03669	6796	7003	6401	6714	10293	6887	6146	7377	7751	8294	6767	6180	8744	9906	7786	10044	6490	5093	6761	6948	7412	7814	8252	6871	5342	13884	6734	10222	6778	9203
CNAG_03670	7878	6987	7231	8923	12215	9046	5853	6977	7640	6166	4691	4644	9343	11289	8325	13161	9248	6674	6221	7338	7314	5957	6691	6817	5565	13614	6628	6122	5587	5668
CNAG_03671	523	396	445	221	117	111	1694	1112	1501	339	239	304	489	736	445	152	134	124	546	733	897	60	90	137	1059	2900	1439	476	181	391
CNAG_03672	3023	2602	2442	1434	2022	1551	3166	3476	4055	2086	1436	1254	3338	4345	3418	1858	1439	1181	2569	2953	2689	1219	1340	1281	2596	6050	3176	2165	1703	1699
CNAG_03673	8570	8666	8087	7473	11139	7568	14160	14995	11795	10442	5897	10190	10245	15701	9350	10555	9080	5844	7381	9017	9358	5887	6756	8002	8276	23144	10000	8429	8986	8078
CNAG_03674	52329	45289	44976	81116	118017	89266	39531	43681	53500	52339	41364	36921	55701	64813	50881	122180	81068	68854	43707	42399	44239	66267	82301	63383	37688	92628	46745	56156	43493	52596
CNAG_12153	157	174	87	221	302	177	330	228	236	533	376	597	88	265	105	292	230	196	153	151	135	182	208	220	139	271	127	435	241	368
CNAG_03675	4017	4294	3786	6083	5809	5397	3656	2757	4504	2948	3201	1621	3814	4758	3689	7369	5131	3564	4129	3818	4067	6670	6415	6693	2707	7333	3761	5830	2769	3534
CNAG_03676	1797	1843	1710	3390	5477	3552	2086	2023	3127	4437	4137	3282	2380	2662	2188	4762	3315	3034	1803	2554	2193	3536	3654	3217	2136	4963	2413	5591	4077	4915
CNAG_12154	48	63	53	81	149	87	86	99	115	408	331	265	99	96	94	121	80	78	37	80	63	130	135	107	99	184	57	397	230	310
CNAG_03677	33891	35402	31975	20069	30646	19269	31756	38884	41564	20751	15884	16645	48277	63432	46192	25796	20321	15571	30064	40804	36534	19046	21208	20370	26645	73800	34438	21387	18478	16336
CNAG_03678	2699	2264	2171	4980	8101	5879	2423	2313	2898	3937	3444	2931	2772	3189	2514	7274	5425	4792	2295	2372	2362	3732	5390	3924	1795	4616	2325	4432	3444	4024
CNAG_03679	4017	6081	4583	1352	2644	1817	3915	4842	7883	13495	13729	10489	6792	9083	6244	1998	1293	1302	5329	8671	5514	5521	4779	3717	4996	11887	5412	18805	8147	17331
CNAG_03680	4883	4569	4560	9093	15548	10628	3821	5104	5862	12268	9947	9094	6628	7134	6026	14618	9408	7610	4179	4665	4818	12015	12013	9755	3956	9888	4803	14662	10245	12864
CNAG_03681	9462	8907	8407	6304	10176	7181	10081	8521	11502	6407	4623	5320	10883	13925	10199	9314	7076	5025	7961	9833	9317	5235	6098	5707	7396	18854	9339	6437	5880	5325
CNAG_03682	55271	54369	53823	20371	38892	27110	43821	40372	78893	14186	15074	10935	68724	69179	62367	33623	19281	20094	62554	65344	66233	12305	16428	17235	51100	115826	64579	18613	19786	16029
CNAG_03683	2180	2223	2022	7494	13063	8288	2101	2216	2989	4071	3290	3691	2679	3534	2791	11540	8350	6844	2408	3000	2454	4300	5350	5059	1966	4740	2332	3494	3613	3083
CNAG_03684	13552	12589	11771	5815	9428	6863	10145	9475	16401	6775	5829	4721	15959	16424	14406	8632	5605	4875	12319	14536	13463	6102	6394	6055	10765	26942	13952	8842	6411	7601
CNAG_03685	3320	3504	3171	1656	3360	2125	2608	2888	4260	3917	3399	3262	4645	5303	4361	2924	2023	1675	2912	4303	3447	2816	2922	2474	2997	7243	3442	4443	3250	4154
CNAG_03686	1816	2319	1865	1153	2311	1382	1879	2015	3097	3280	2926	2760	2795	3473	2608	1719	1329	1170	2073	3048	2287	2185	2119	1737	1869	4461	2050	4042	2563	3351
CNAG_03687	2268	2185	2019	1671	2594	1834	2340	2093	2765	2434	1887	1890	2583	3575	2720	2279	1808	1475	1778	2283	2360	1616	1830	1880	1829	4624	2176	2206	2175	2098
CNAG_03688	15101	20675	14787	25032	41903	25889	19610	22037	22355	70454	49903	69319	22197	37416	21743	31868	29257	21498	13123	22877	16229	33072	34235	35634	15724	38280	16222	60992	41536	53116
CNAG_03689	13593	13018	12665	14862	23087	15739	13577	14146	14220	18338	11795	14397	17885	21547	15197	22696	16650	11562	10908	12492	12887	15336	16758	15057	10532	26901	12950	17268	13590	15781
CNAG_07473	25093	21898	21852	12640	22346	16327	21289	21319	29459	10574	8028	7701	26227	29303	23249	21681	13946	12672	22731	22585	23976	9762	11749	13076	19296	48798	25384	11312	12461	10120
CNAG_07474	3060	3121	2787	2006	3547	2249	2801	2490	4137	1632	1418	1339	3794	4101	3585	2988	1965	1726	3118	3306	3515	1598	1684	1752	2359	6494	3236	1688	1934	1618
CNAG_03692	3496	3700	3542	4829	7838	5389	2771	4268	4665	9001	7497	8064	5337	6803	4985	7209	5213	3864	3093	3667	3664	6070	6161	5108	3056	7946	3802	10840	6422	9548
CNAG_03693	3549	4000	3333	2408	3677	2623	4199	3421	4310	2350	1708	2233	3953	5819	3613	3323	2810	1990	3647	4105	3757	1554	2097	2280	2717	6538	3335	2354	1910	1827
CNAG_03694	4414	4483	4054	5466	8123	5448	4685	4674	5930	4993	4167	4188	5489	6562	5072	7355	5588	4130	4194	5147	4399	4551	5079	4547	3583	9546	4701	6004	4580	5307
CNAG_03695	1398	1240	1106	2553	4160	2750	1491	1308	2180	1009	807	759	1669	1893	1682	3400	2535	2224	1299	1863	1495	1233	1606	1450	1427	3042	1637	1008	1165	951
CNAG_12155	23	21	23	41	49	23	34	37	43	24	17	26	49	41	21	39	28	20	13	30	15	23	38	18	39	43	39	21	33	27
CNAG_03696	852	802	674	2011	2978	2260	1240	1087	1165	1054	748	935	929	1388	802	2885	2370	1755	750	994	825	772	1084	1305	738	1789	823	860	929	830
CNAG_03697	4916	4239	4450	7409	12491	8230	4336	5362	5899	8015	5612	6261	6011	6824	5786	10918	7657	6591	3501	4430	4192	5932	6540	6496	4018	9855	4814	7870	7453	7204
CNAG_03698	2697	2923	2383	2432	3830	2402	3079	2925	3761	2738	2104	2474	3555	4606	3455	3253	2508	2049	2724	3816	3366	1918	2247	2562	2582	6242	3079	2895	2506	2314
CNAG_03699	12660	11690	10837	10476	15150	10663	12204	11463	13292	11246	7863	8384	12964	16880	12187	14832	11008	8477	9968	11210	12120	8627	9505	9896	9457	23799	11260	11299	9011	9980
CNAG_03700	2842	2915	2671	2203	3170	2136	3279	2651	3211	2353	1681	1879	3408	3855	3074	3113	2471	1738	2581	2681	3050	1652	1839	2217	2365	6028	2655	2210	2210	1979
CNAG_12156	0	0	0	0	0	0	0	0	0	0	0	0	0	0	0	0	0	0	0	0	0	0	0	0	0	0	0	0	0	0
CNAG_03701	24658	21930	21947	7840	13295	9456	16772	18436	25747	6667	6138	4658	26922	27347	23341	13283	7829	7121	21918	20736	23546	7584	8757	7854	17567	44467	21980	8548	7799	7868
CNAG_03702	2775	2977	2677	1512	3001	1973	2962	2989	4661	1967	1612	1569	3452	4124	3303	2541	1588	1406	3097	3852	3463	1116	1445	1855	2951	7414	3462	2069	2368	1931
CNAG_03703	0	0	0	0	0	0	0	0	0	0	0	0	0	0	0	0	0	0	0	0	0	0	0	0	0	0	0	0	0	0
CNAG_12157	59	52	42	77	146	89	129	84	131	494	331	426	45	75	42	99	107	73	64	105	53	157	130	205	84	185	56	450	278	400
CNAG_03704	4	8	6	16	14	8	3	4	3	60	56	50	0	0	4	15	17	13	8	1	2	10	9	20	4	6	3	70	34	60
CNAG_03705	18289	20711	17442	19404	34669	21520	28258	25251	33578	82073	61107	67143	25212	33862	22311	30248	22046	15338	17086	21952	19712	51365	45351	34907	20750	51637	25820	80540	47366	76470
CNAG_03706	35021	30856	30038	23053	37393	26525	31686	30309	39929	22334	17198	18341	37195	44600	34471	34920	25228	19770	29836	32421	32466	18317	21297	23120	26788	64658	33560	25652	23338	22365
CNAG_03707	2180	2181	1951	5345	9277	6286	3026	3072	3913	5753	4464	4855	2596	3403	3183	7674	5830	4287	2434	3146	2703	4320	4917	4649	2418	5900	3027	5835	5255	5008
CNAG_03708	6137	6387	5462	4036	6270	4767	7379	6546	7849	4798	3265	4028	7201	9932	6444	5237	4678	3532	5732	6682	6279	3293	3735	3653	4912	12069	6193	4526	3988	3974
CNAG_03709	3645	3180	3130	3329	4491	3655	4503	3991	4401	3521	2277	3040	4399	5752	3874	4429	3858	2770	3058	3885	3414	1825	2390	2629	2995	7943	3589	2994	2943	2939
CNAG_03710	8178	8205	7862	5824	8313	6148	8187	8382	9869	5862	4677	4031	9696	11595	8507	8228	5844	4575	7599	8023	8258	6434	6483	6476	6859	17340	8555	7667	4988	6031
CNAG_12158	17	19	7	26	36	34	26	12	16	19	9	43	19	35	12	22	42	16	27	27	11	15	27	26	11	25	6	7	12	5
CNAG_03711	2301	2251	2009	2072	2984	2284	2547	2167	2998	2328	1870	2144	2695	3740	2591	2683	2211	1813	2045	2726	2275	1300	1813	1969	1895	4368	2283	2501	2378	2175
CNAG_03712	1094	957	891	818	1314	892	1148	872	1317	1020	815	762	1084	1167	1044	1125	769	695	832	1125	1038	621	614	652	835	2040	1015	1162	1038	930
CNAG_03713	1249	1201	988	1980	3530	2287	880	1699	1435	1688	1571	1387	1732	1844	1635	3232	2101	1796	2109	1968	1614	1876	2243	1891	791	1886	956	1962	2104	1588
CNAG_07475	76	77	52	52	82	57	117	173	111	176	94	213	80	193	88	82	80	54	103	113	84	72	103	102	55	131	88	133	92	81
CNAG_12159	0	0	0	0	0	0	0	0	0	0	0	0	0	0	0	0	0	0	0	0	0	0	0	0	0	0	0	0	0	0
CNAG_12160	90	70	60	36	89	69	84	123	130	151	164	115	110	191	113	86	72	61	101	177	65	64	80	88	57	147	72	178	93	147
CNAG_03714	9096	6530	6505	4635	6814	4760	10068	6064	10021	3185	2356	2701	6366	8606	6302	5947	4770	4479	6566	7509	6021	2408	2944	3492	5859	12756	6724	3233	3729	2952
CNAG_03715	3070	2295	1966	3361	4145	3357	7718	2935	4754	1134	797	1210	1369	3060	1625	3218	3452	3743	2614	3475	1866	1067	1533	1499	1958	3852	2211	1028	1517	802
CNAG_03716	728	308	315	921	617	767	571	204	265	103	60	40	202	386	242	770	859	863	334	214	162	283	378	575	219	380	241	157	136	96
CNAG_03717	1250	1321	1231	3399	5506	4094	1400	1455	2080	1832	1571	1527	1564	2018	1583	5044	3690	3077	1604	1965	1665	2139	2920	3488	1233	3096	1578	1978	2336	1563
CNAG_03718	2995	2714	2536	3377	3745	3128	2708	2614	3004	2740	2142	1965	3395	3815	2990	4015	2838	2188	2606	2802	2963	4229	4158	4401	2029	5065	2410	3753	1811	2774
CNAG_03719	4720	5415	4563	19442	27958	19058	1592	2266	2468	13806	12784	10677	6722	7925	6709	23183	18038	14111	4387	5566	5185	23122	26121	27855	1476	3924	1740	20613	12363	15217
CNAG_03720	3433	3828	3046	2678	3879	2718	4244	3643	5306	2652	2267	2693	4266	6079	4024	3427	2756	1999	3406	5526	3866	2304	2749	2525	3285	6987	3559	3200	2001	2452
CNAG_03721	7226	8716	7057	5388	8632	6036	8188	7309	9211	6389	5259	5803	9194	12141	8649	7521	5828	4631	7589	8878	8621	5432	5759	5073	6122	14831	7583	6751	5290	6292
CNAG_03722	26487	24067	23312	12053	19428	13810	19264	19391	30061	12633	8857	9111	30784	35564	27562	18109	12505	10388	21301	23861	25032	10506	11801	12133	19068	48273	23462	12261	11937	11884
CNAG_03723	4791	4722	4136	4082	6626	4307	5577	5519	5767	5736	3473	4388	5467	7656	4787	6154	4708	3275	4008	4293	4888	3502	4259	4655	3968	10108	4849	5095	4896	4859
CNAG_03724	8239	8663	7916	6407	6663	6238	8618	6364	9423	4308	3834	2718	8289	10871	8013	8121	6071	4014	7707	7518	8241	7027	6594	8602	5848	14745	7327	6756	3522	4328
CNAG_03725	22088	17784	18830	10994	19934	14202	12086	11916	25790	6070	7316	4649	23700	21358	22787	17795	10424	11095	19338	20788	19963	8002	9509	8505	17069	37078	20878	10038	8859	8000
CNAG_03726	13630	13280	12723	12217	21613	14044	10251	11600	14904	11022	9301	8292	17711	18851	16280	18942	12151	10767	12374	13743	13355	11568	13002	11576	10253	24699	12583	14584	11078	12434
CNAG_12161	1302	1444	1182	729	965	589	1656	1692	2013	573	422	520	1292	2252	1453	800	694	639	1498	2005	1439	403	557	644	1371	2934	1326	450	421	392
CNAG_03727	21045	19813	19473	15343	23495	16952	19965	23299	25560	60425	40898	42393	26375	29652	22645	24044	15551	12879	17450	19329	21544	24840	26253	24649	17870	46163	22160	59477	41638	59874
CNAG_03728	1314	1513	1315	1887	3285	2038	1711	1969	1634	5988	3984	5991	1874	2517	1838	2792	2050	1400	992	1229	1319	3907	3565	2845	1143	3092	1476	5217	3126	5260
CNAG_03729	1354	1320	1286	4173	6624	4679	1376	1217	1860	4592	3697	3652	1666	1755	1553	5983	4416	3798	998	1293	1245	3176	3897	3399	1130	2958	1462	5075	3865	4151
CNAG_03730	3291	3755	2582	2673	4065	2905	4194	3667	5257	3262	2812	2881	3728	5781	3625	3433	3151	2647	3208	4956	3617	1894	2331	2443	3139	7139	3649	3452	2317	2825
CNAG_03731	752	603	524	552	696	495	765	601	796	590	485	365	691	791	582	625	504	521	626	706	747	439	538	618	678	1520	798	806	638	644
CNAG_03732	1970	1913	1807	3989	5861	4245	2633	2317	3500	3110	2409	2513	2424	3189	2253	5324	4304	2936	1868	2652	2359	3626	3948	3327	2264	5648	2468	3864	2441	2705
CNAG_03733	681	644	614	1723	3241	2055	708	796	1015	3576	2444	2777	939	1050	769	2871	2114	1519	580	724	655	1952	2211	2350	545	1563	807	3251	2927	3333
CNAG_03734	2238	2083	1908	3131	4704	3412	2923	2828	2905	3594	2271	2894	2709	3430	2716	4299	3226	2614	1887	2199	2032	2429	2633	2692	1785	4690	2192	3152	3081	2805
CNAG_03735	6236	5587	5194	5757	8178	5944	5106	5373	8285	5301	4803	3828	6720	7863	6550	7918	5294	4692	5877	7130	6868	4397	5485	5113	5151	12276	6171	6492	5945	5488
CNAG_07476	2767	2398	2519	3285	5021	3321	2217	2918	2974	6522	4644	5184	3126	3852	2980	4597	3254	2262	2013	2339	2240	4052	4292	3661	2116	4864	2466	6695	4846	6744
CNAG_03738	5663	6430	5335	4700	8842	5659	3950	4575	6210	11857	10989	9458	7462	9171	7328	7150	4841	4190	4992	6887	5400	8522	8839	6357	4523	10834	5270	14343	7941	13024
CNAG_03739	66119	58934	58885	14448	26226	20310	33894	26471	69597	8882	10144	5763	67813	58337	64358	25337	12603	15567	59080	58297	59753	11053	12893	11520	45371	97948	57994	14023	11739	11164
CNAG_03740	244	232	172	346	329	301	381	404	377	489	312	555	267	348	321	391	383	185	267	288	203	255	352	261	192	583	220	447	304	347
CNAG_03742	21598	19020	19053	12963	23696	15304	16853	17269	22644	11116	8412	7999	24404	26082	22242	21316	13575	12052	17151	18394	20308	10448	12224	11017	15470	39415	20152	11543	12110	10721
CNAG_03741	29	36	39	19	29	37	21	21	38	57	23	26	22	37	35	47	31	14	19	35	25	15	22	16	18	48	29	39	41	26
CNAG_03743	3082	2977	2798	1528	2680	1696	3061	2656	3390	1640	1155	1241	3588	4471	3378	2212	1597	1205	2624	2912	2854	1150	1296	1343	2332	5441	2798	1718	1375	1371
CNAG_03744	59	36	36	83	117	87	97	85	102	163	168	129	81	98	72	96	48	79	86	52	52	73	108	63	47	137	66	160	114	136
CNAG_03745	955	708	705	1783	3083	2210	1091	685	1310	1323	1081	1073	989	1093	807	2742	2013	1689	730	889	765	1314	1511	1540	747	1684	863	1617	1572	1456
CNAG_12162	3	18	6	16	26	12	9	7	3	15	26	17	4	4	2	32	14	17	5	2	4	7	22	20	4	2	2	18	12	16
CNAG_03746	514	453	524	1702	3041	1950	686	1159	876	1438	961	1226	684	814	714	2807	1912	1555	424	597	483	1245	1635	1199	507	1203	533	1377	1116	1094
CNAG_03747	56397	62728	53852	11606	16522	13643	47026	30554	60461	6133	5149	4213	60293	69085	56508	15848	10967	9914	47927	59387	54331	6528	8079	8950	44018	97291	50587	6874	6180	4850
CNAG_03748	26374	23165	23075	13653	23872	17111	21453	20390	30178	12226	9885	8628	27913	28424	24191	23788	13773	13255	23574	22843	25310	10601	13346	13263	21016	52547	26896	13374	14076	13256
CNAG_07477	6469	6286	6167	4805	7217	5217	6054	7119	7175	11272	7933	9231	8278	10107	7531	6956	4849	3679	4463	5513	5988	6267	6148	6628	5314	14011	6796	11104	9077	11502
CNAG_07478	173	198	193	173	265	171	193	140	210	156	66	94	205	216	186	198	191	128	163	164	182	93	114	131	113	365	159	126	116	123
CNAG_12163	4	10	12	21	48	22	10	6	5	44	34	7	18	14	15	22	12	20	14	10	10	70	58	27	4	20	3	46	21	49
CNAG_03751	3733	3605	3396	3679	5357	3834	3384	3411	4640	3930	3220	2894	4702	5333	4694	5175	3584	2778	3169	4034	3782	2952	3338	2993	3211	7688	3795	4122	3356	3684
CNAG_03752	1524	1310	1333	1850	3197	1875	1650	1593	1758	3464	2242	2978	1628	2099	1486	2849	2253	1594	1212	1274	1602	1865	2116	1937	1166	3063	1373	3248	2610	3542
CNAG_03753	1768	1848	1674	1355	2821	1763	1853	1622	2893	1182	1062	1001	2316	2335	2248	2108	1537	1224	2078	2703	2301	912	1150	1253	1747	4616	2316	1178	1389	1039
CNAG_12164	214	196	193	313	509	382	190	228	411	810	554	475	245	370	271	415	340	255	217	403	183	237	328	430	211	476	201	732	544	663
CNAG_03754	33	58	38	26	66	37	62	56	132	646	537	405	76	102	76	42	31	22	105	138	109	178	186	195	64	172	82	812	490	708
CNAG_10022	0	0	2	0	0	1	2	0	0	0	1	0	0	0	0	0	0	2	0	0	4	0	6	0	0	0	0	0	0	0
CNAG_03755	4055	4546	3639	2837	5042	3453	5241	4748	7475	1839	1577	1782	5237	7765	5097	3870	2631	2857	4758	7418	5067	1229	1988	2646	4322	9678	4520	2077	2531	1754
CNAG_03756	7267	6884	6474	7881	13355	8671	6701	6890	8947	9807	7265	7895	8373	9863	7650	12441	8122	6882	6349	6609	7536	7592	8462	7748	5942	15557	7766	10266	8903	10181
CNAG_07479	5747	4914	5155	10477	17242	11683	8018	8886	7822	13272	8068	11434	7133	9676	6565	16651	12408	8360	5234	5402	5561	8168	9633	10924	5383	14063	6964	10303	11127	11246
CNAG_07480	319	305	315	315	453	354	570	463	442	294	245	275	440	655	405	482	375	263	345	359	359	222	218	301	312	750	404	260	289	245
CNAG_07203	13	17	15	6	16	11	27	11	16	18	3	10	14	33	21	18	10	5	14	12	14	10	16	11	13	12	12	11	9	9
CNAG_03759	677	1267	1125	197	115	229	1520	1367	2676	2462	1503	1093	1845	2121	1260	356	65	109	1595	2541	1888	150	190	170	1395	3257	1589	4487	515	2705
CNAG_03760	7868	7761	7423	4965	9322	5573	6986	6602	10155	5756	4484	4262	10050	11397	8921	7933	5342	4588	7204	8049	8504	4141	4734	4920	6856	17413	8440	6268	6229	5816
CNAG_03761	13072	12103	11742	8919	14788	10272	11939	12127	14259	10201	7395	7830	14798	18122	13211	14324	9861	8256	11505	11797	12666	7505	9085	9325	9929	25517	12700	9922	9444	9915
CNAG_03762	6109	6233	5780	8436	9512	7730	6616	5060	6267	5129	3858	4072	5542	7978	5387	10535	7469	5330	5350	5095	5316	6985	7083	9014	3927	9899	5006	6544	4280	4967
CNAG_03763	31533	23404	24830	14060	20126	15495	35795	32652	38589	15922	10299	13064	30193	37643	36206	19810	14733	13295	25037	26835	25665	8652	11022	10251	24865	60036	30456	13232	16073	13477
CNAG_03764	106	133	152	363	384	358	165	68	170	204	104	81	119	159	106	354	320	237	104	126	114	241	272	213	129	260	106	203	108	116
CNAG_12165	24	21	13	49	46	60	23	42	41	117	98	66	18	17	9	51	45	23	10	20	13	47	46	39	31	45	22	100	64	106
CNAG_03765	58268	55374	53380	30528	53721	35767	50334	58781	71592	49787	38467	37397	74570	83098	65476	52744	34137	26221	51058	58712	61361	44234	47956	37334	50439	133098	65111	52658	41299	50000
CNAG_03766	3529	3604	3419	3089	3891	3163	3788	3401	4574	1871	1377	1443	3879	5429	3943	4034	3136	2464	3248	3760	3192	1770	2130	2259	3009	7021	3320	2075	1600	1461
CNAG_12166	320	294	204	459	808	571	386	498	405	64	141	101	303	385	265	611	423	421	411	296	169	290	399	217	253	433	196	171	77	107
CNAG_12167	17	76	21	108	58	55	90	54	30	44	28	39	19	77	23	61	95	67	65	52	33	47	57	37	14	38	14	45	12	16
CNAG_12168	182	147	143	250	344	247	159	172	248	374	257	246	191	227	227	391	229	141	185	249	164	238	231	274	147	301	207	405	339	345
CNAG_03767	6828	5831	5126	3991	6344	4294	8279	6826	8912	3075	2389	2905	6416	8752	6576	5732	3974	3805	6073	7563	7009	2339	2884	3318	6024	15359	7434	2916	3489	2544
CNAG_03768	9720	7657	8064	9680	14890	10071	9660	10222	10796	10480	6633	8125	9740	12060	9072	14759	10583	8013	7286	8225	7779	7892	8784	8364	7612	17666	8775	9718	8661	8858
CNAG_03769	57300	58323	52877	28844	51824	32908	52295	61369	68975	40758	31399	33429	71197	88565	66704	44394	32782	24634	52588	63550	59177	32899	38462	33788	46157	118365	57112	43062	35194	37574
CNAG_03770	139	117	106	153	267	159	142	80	133	177	156	218	140	232	143	200	164	172	110	142	95	132	159	149	73	136	113	174	165	147
CNAG_03771	68649	80622	69964	50810	88005	56012	42168	51364	54030	236371	154531	184798	103158	123443	84750	82738	57776	38781	43537	53589	58705	135546	135705	107259	41527	113854	50445	229817	131301	224342
CNAG_03772	1578	1066	1280	377847	575113	438229	425	293	721	29404	30657	24213	1116	1416	1426	538950	352689	393936	686	811	698	112524	176230	152827	476	909	431	38044	47364	29244
CNAG_07965	37017	34593	33107	14240	24930	16526	40105	27891	55343	33187	27985	25171	40100	44247	36886	23802	13968	12342	30663	35458	34280	19424	19760	18424	34658	79551	42066	41851	26981	39078
CNAG_03775	17845	18204	17395	28078	43071	29162	23155	27768	24719	46704	31138	40307	22289	30557	22027	40142	31584	22224	16877	20332	19638	27263	30304	29482	16764	40815	19486	46038	34532	42063
CNAG_03776	1611	1565	1348	1997	2965	2177	2150	1521	2089	2114	1514	1637	1741	2423	1619	2687	2201	1674	1331	1718	1541	1361	1420	1670	1246	3261	1508	2246	1834	1749
CNAG_03777	2420	2583	2417	3662	6398	4111	2560	2828	3719	4059	3463	3069	3237	3701	3130	5197	4030	3267	2576	3065	2915	3245	3907	3487	2244	5887	2880	4443	3878	3774
CNAG_07076	328	421	398	2591	4428	3103	512	622	743	5909	4264	4856	494	645	560	3604	2844	2102	458	587	426	2451	2839	3091	419	1049	490	5844	4766	5424
CNAG_07481	2755	2906	2728	2828	4892	3122	2680	3318	3674	3919	3358	3110	3797	4227	3430	3991	2787	2519	2430	3009	3027	3141	3625	2530	2643	6237	3054	4179	3008	3986
CNAG_03779	5979	5511	5231	3468	5088	3703	4831	4214	5765	2492	2205	1998	6026	7104	5522	5060	3888	2775	5310	5183	5313	2794	2973	3050	4142	9698	4959	3041	2605	2999
CNAG_03780	59063	57570	55000	10538	16698	13293	36482	25935	60137	5222	5285	3268	60105	61591	56835	16238	9889	9894	56997	53751	55043	6342	7991	8159	38539	87686	49275	7050	6439	5606
CNAG_03781	2645	2005	1988	2303	3326	2496	3182	2093	3010	1774	1431	1468	2138	2671	1941	3124	2426	2205	2079	2417	2226	1376	1670	1997	1873	4593	2506	1929	1942	1771
CNAG_12169	30	57	31	85	107	75	68	66	49	390	284	348	59	65	20	96	88	62	35	37	35	191	230	144	58	84	53	337	164	299
CNAG_03782	1636	1848	1699	32415	60949	32179	804	1515	1256	319291	249476	255667	2976	4093	2709	51183	34492	21239	846	988	1041	204382	174857	126307	786	2269	1024	360567	200547	360018
CNAG_03783	959	1083	900	8729	17401	9918	1126	1176	1320	41741	31573	30155	1525	1671	1345	15241	10291	6490	1030	1251	1039	35267	35374	28077	901	2481	1163	45983	34353	44107
CNAG_03784	367	345	333	982	1575	1049	527	561	779	2161	2186	1590	518	685	489	1462	1036	811	403	517	374	1763	2018	1672	400	916	383	2987	2321	2797
CNAG_03785	24625	22770	22117	19751	38370	22976	24882	28357	33226	37801	29659	30054	30803	33443	26084	33863	21792	17074	22984	24695	25948	26697	27601	22051	22517	56664	28919	42780	29845	42333
CNAG_03786	2471	2013	2104	1258	1785	1155	1916	1627	2400	1738	1504	1311	2258	2712	2414	1762	1228	1078	1849	2073	1840	1191	1358	1249	1676	3752	1961	2140	1697	1897
CNAG_03787	84751	71016	70698	33986	52118	42204	80609	71478	92674	44045	31818	33315	84086	106139	79559	52166	37591	33162	70419	70499	66593	22013	28070	32494	56375	131023	71390	43501	43671	40600
CNAG_03788	1917	2146	1947	3543	5046	3478	1703	1762	2409	5947	4709	4206	2606	2696	2320	4832	3460	2382	2000	2117	1995	4438	4017	3795	1601	4101	2054	7544	4423	6688
CNAG_03789	4466	5288	4084	5171	6033	5233	4212	2912	6056	2326	2847	1119	4650	6078	4547	5868	4181	3666	5182	6128	4439	4255	5090	5421	3343	8068	3944	4049	1883	2365
CNAG_03790	17828	15193	15159	26883	43072	29729	15063	16490	21323	26325	20878	19835	20103	21799	18759	40908	27872	23067	14733	16029	16025	22643	25910	24714	13316	32885	16765	28369	25707	26173
CNAG_03791	10757	10293	10302	7494	13717	9331	8150	9869	11260	11810	8668	8057	13421	15836	11927	13544	8534	6781	8584	9403	10051	11027	10921	9493	8156	20459	10524	12288	10119	12469
CNAG_03792	4060	4020	3805	2614	4915	3165	3169	3469	4376	3820	3200	3347	5275	6031	4757	4413	2747	2226	3488	3825	3831	3444	3722	3151	2955	7333	3636	4479	3343	4086
CNAG_03793	2779	3094	2509	2722	4267	3329	2874	2286	4652	1487	1572	1220	2933	3675	3029	3825	2489	2825	3379	4372	3104	1574	1943	2119	3012	5640	3113	1893	1867	1334
CNAG_03794	2986	2936	2688	2616	5073	3203	2319	2540	4026	7487	7283	5304	3909	3850	3422	4457	2669	2222	2769	3142	3077	7479	6719	4206	2844	7113	3593	9561	5703	9021
CNAG_03795	603	461	489	203	375	244	481	517	581	197	184	185	705	874	658	313	238	197	459	606	537	164	170	244	489	1029	575	286	195	165
CNAG_03796	6038	6229	5772	5044	9146	6185	4979	5026	8133	6050	5409	4586	7816	8630	7339	7633	5110	4419	5972	7456	6560	5293	5900	5327	5166	12946	6583	7195	5796	6303
CNAG_12170	39	43	50	101	119	97	85	81	101	206	150	157	63	119	70	126	94	53	68	89	66	63	133	99	71	171	79	190	132	165
CNAG_03797	19	33	27	20	30	34	25	28	29	70	57	96	14	33	21	37	49	28	22	44	31	17	38	29	38	72	37	48	42	44
CNAG_03798	0	0	0	2	0	0	0	0	0	0	0	0	0	0	4	2	0	0	0	0	0	2	2	0	0	0	0	0	0	0
CNAG_03805	11020	9376	9041	7801	13871	9295	8841	9122	17686	8218	9590	5844	12729	12479	13188	11528	7204	7858	13392	15894	12484	8799	10222	7505	12173	25096	14156	12589	9313	9765
CNAG_03806	12405	11566	11889	11390	19731	12852	11774	15350	15573	21656	16241	17155	16281	19784	14811	18051	12843	9394	11572	13365	13153	14468	15456	15113	10558	26453	12622	23246	17264	21968
CNAG_12171	49	84	45	96	98	98	74	72	89	102	97	58	48	122	47	94	76	79	93	102	40	59	78	83	48	135	42	114	51	89
CNAG_03807	3075	3017	3086	3364	4543	3490	6593	5697	7096	3703	2835	3546	3884	5657	3976	3794	3264	2752	4275	6145	4184	2182	2869	3419	4187	10116	4612	3634	3770	2842
CNAG_03808	4829	4694	4542	12212	22637	14089	4250	6088	7352	14937	13550	11198	6239	7037	6092	19744	12433	11266	4595	5362	5126	12385	13352	12681	4639	11175	5842	20043	16305	17479
CNAG_03809	10203	10208	9588	7890	12094	7899	12223	12487	11578	10197	6206	9156	12765	17924	11236	11260	9574	6005	8429	9229	10090	6723	7444	8112	7662	19900	9645	9126	8002	8719
CNAG_03810	5774	7125	5575	4038	6502	4535	7947	6194	8412	4536	3580	4159	7223	11535	6864	5454	4596	3911	6448	9565	6675	2958	3514	4105	5256	11588	5641	4468	3792	3767
CNAG_03811	7749	7074	6569	3974	6083	4049	8478	7797	10923	3873	2839	3123	8759	11027	8733	5710	4162	3509	7133	9768	7609	2877	3263	3916	7005	16525	8269	3910	4156	3574
CNAG_03812	20010	20681	19172	10311	16546	11578	10418	9657	13923	5081	3960	3917	15529	18214	13943	8678	6157	5047	12167	13538	13457	4412	5404	5536	9247	22519	11383	5538	5161	4650
CNAG_10023	0	0	0	0	2	0	0	0	0	0	0	0	2	0	0	2	0	3	0	0	0	0	0	2	0	0	0	2	0	0
CNAG_03813	7696	9023	7001	6426	11650	7541	8862	8083	12655	9142	9053	7816	9756	13175	9668	9551	6686	6678	8484	13175	8214	7074	8151	7615	7842	16849	8076	10646	8581	8922
CNAG_03814	8052	9406	7736	6397	10663	7373	8514	6817	11332	4369	3968	3452	9417	12557	9039	8589	6563	6424	9077	11856	9477	4114	5109	5679	7593	16452	8711	4619	4451	3520
CNAG_03815	7015	6994	5902	3718	4951	3525	7719	7813	8998	5449	4085	4225	7766	10614	7222	4864	4006	2794	6252	7037	7071	3582	3702	3601	5958	15170	7123	5489	4540	5066
CNAG_03816	8374	8369	7293	3887	7445	5011	7514	6647	13837	3356	3635	2557	10193	11115	10332	5977	3829	4416	9706	14133	10067	2892	3767	3554	8461	18914	9580	4667	4369	3928
CNAG_03817	2376	3210	2195	3263	3229	3219	2559	1663	3266	1437	1638	851	2518	3242	2424	3692	2640	2080	3187	3366	2609	3052	3288	3345	2165	4570	2263	2587	937	1433
CNAG_03818	12622	11165	11495	10031	16418	11404	11522	13205	13906	10751	7228	8509	14824	17844	12927	15965	11205	8630	10479	11095	12095	8738	10440	9928	9843	25253	12515	10492	10336	10000
CNAG_03819	11096	8563	9007	5944	9896	7503	7941	7338	14121	2626	2608	1660	10814	9723	9824	9365	5260	6153	9927	10848	10877	2992	3973	3393	8363	19895	11019	3088	3729	2637
CNAG_03820	7107	7318	6069	4759	6122	4834	8767	6403	9011	4207	3915	3623	7167	10160	6717	6445	5071	3858	6951	8065	7208	4636	4316	6176	5421	14306	6645	6291	3822	4533
CNAG_03821	7504	7053	6936	6976	12088	7821	7952	8175	9207	8194	5898	6635	8765	10827	8441	11071	7851	6010	6422	7443	7503	5903	6575	7427	6138	15401	7766	8199	7842	7637
CNAG_12172	31	30	17	40	48	20	35	19	21	15	9	28	16	30	11	42	11	18	10	42	16	7	18	28	24	46	27	14	19	15
CNAG_03822	2092	2334	1748	1767	1950	1715	2334	1648	2198	962	802	713	2128	3118	2072	2111	1491	1135	2044	2262	1924	1488	1666	1677	1424	3200	1670	1270	628	837
CNAG_03823	6189	7182	5874	5913	11203	7167	5930	6326	11037	5528	5621	4140	8318	9957	7830	8765	6213	6026	7188	11068	7622	5209	6419	6100	6673	14701	7200	6484	5945	5424
CNAG_03824	25984	31164	26784	8904	17211	11913	14628	16383	27806	17282	16489	11546	37979	41530	35060	14515	8051	8186	23195	33516	27111	19316	19107	13818	19882	45213	23129	22843	11956	20654
CNAG_12173	388	475	414	512	597	597	434	369	428	666	458	473	479	755	499	568	533	411	381	459	314	601	636	573	265	590	256	504	324	408
CNAG_03825	127	132	112	499	610	419	213	201	240	504	393	676	104	192	122	540	471	378	162	205	172	245	374	451	135	313	167	508	431	426
CNAG_12174	220	252	227	202	312	173	343	293	359	290	248	290	222	350	234	248	232	152	299	345	256	160	185	147	229	413	210	303	209	232
CNAG_03826	3806	3648	3674	5263	7235	5385	3516	3279	4967	5131	4410	3726	4473	5208	4182	7326	5235	3977	3561	4215	3810	4957	5434	5423	2970	7984	4097	6402	4871	4994
CNAG_03827	8225	7523	7889	11250	19269	12848	7161	8550	9995	13212	9825	10253	10777	12270	9696	17835	12239	9218	6907	8182	8384	9958	11283	11909	7026	17960	8743	13172	14050	12660
CNAG_03828	1978	1968	1962	4137	7260	4481	1745	1965	2905	6066	5056	4097	2740	3191	2505	6460	4325	3666	1826	2384	2126	4336	4072	3359	1817	4668	2392	7818	4686	7265
CNAG_03829	9688	8415	8564	10434	18072	12132	6210	7411	10691	6686	5571	4715	12182	12313	11562	16562	10800	9704	8050	9174	8921	6962	8096	7692	7534	16690	9021	7796	7523	6637
CNAG_03830	174	191	174	238	401	299	1620	1614	1674	3417	2929	2179	226	280	181	304	274	265	314	423	362	283	333	333	1509	3800	2167	3526	3896	3280
CNAG_03832	20833	19446	18940	10101	16410	10565	16422	20008	27348	14094	12253	10103	26504	28822	25489	14725	9950	8135	19426	23681	23272	9588	10863	10214	18811	45943	23268	16517	13268	14445
CNAG_03831	0	0	0	0	0	0	0	0	0	0	0	0	0	0	0	0	0	0	0	0	0	0	0	0	0	0	0	0	0	0
CNAG_03833	193	218	197	312	364	256	194	227	249	455	338	367	265	316	285	455	320	240	220	173	207	338	355	266	161	425	207	567	344	386
CNAG_12175	597	621	519	824	1398	1053	429	603	727	1656	1375	1186	719	885	748	1389	908	874	542	655	576	968	1089	925	444	1232	514	1786	1226	1405
CNAG_03834	7753	6377	6325	8449	11984	7495	6475	8925	7952	10377	7571	8505	8816	10096	8284	11441	8609	6493	6981	6543	6270	7872	8239	6446	5302	12401	6357	11735	7943	10479
CNAG_03835	1284	1332	1162	1707	3104	1992	1569	1393	2126	1497	1648	1528	1651	1947	1505	2354	1555	1656	1368	2296	1542	1063	1381	1387	1310	3143	1473	1886	1938	1566
CNAG_03836	8600	8055	7489	3854	5064	3709	11379	11464	13032	9485	6285	7849	9531	11907	8242	4594	4021	2897	7775	9041	9210	3807	3867	5105	8206	20429	10413	8938	9787	7982
CNAG_03837	3079	3684	2958	9943	20485	11737	2747	3811	6178	19123	19736	14915	4806	5322	4613	14333	9618	9536	3643	6154	3978	10467	12318	12016	3894	8274	4332	25839	18032	22103
CNAG_03838	723	926	833	6309	12290	6908	695	885	1313	19438	15489	13356	1370	1287	974	10114	6658	5044	983	1246	1260	10715	10949	9728	824	1950	968	22457	16515	20957
CNAG_03839	13313	12077	11656	11352	17576	11992	13410	14153	16056	16385	11545	13033	15354	18885	13880	17379	12063	9438	11822	12285	12357	12218	13047	11286	10846	26357	12896	17332	12972	16254
CNAG_03840	4790	5780	4593	3564	5401	3703	6513	5653	6475	5096	3699	4821	5528	9527	5994	4413	4096	2933	4899	7385	5382	3711	3916	3941	4205	9870	4462	4901	3465	3583
CNAG_12176	196	304	204	150	311	256	410	285	356	219	130	177	292	407	260	263	194	154	246	400	274	209	250	261	280	544	253	227	168	114
CNAG_03841	24292	22235	21212	40625	62510	43766	22913	22485	23855	38126	23433	32932	27282	37000	25870	59781	46928	31872	19522	21150	22574	32401	39251	44636	16858	42298	20023	31855	36821	30381
CNAG_03842	134	131	119	256	351	246	129	144	215	771	548	699	153	257	182	396	375	206	143	147	193	360	409	457	110	280	118	723	546	697
CNAG_03843	9231	8770	8686	7589	12802	8690	10049	10082	10938	9741	6611	7995	11673	14275	10077	12239	9111	6739	7948	8775	9295	6322	7287	7575	7848	20158	10086	8727	8946	8903
CNAG_03844	6973	7068	6355	3968	7129	4641	6926	7938	9093	6351	4961	5423	8948	11244	8491	6097	4335	3379	6557	8060	7224	4880	4994	4439	6439	15298	7376	6675	5607	6444
CNAG_03845	4023	3978	4024	1513	2316	1808	4968	3647	4470	1949	1355	1639	4663	6452	4229	2047	1840	1207	3435	4094	4143	1300	1428	1621	2998	7692	3987	2131	1668	1723
CNAG_03846	3403	3305	3302	3226	4540	3244	3990	3481	4247	3631	2527	3120	3997	5222	3813	4374	3523	2639	2791	3444	3676	2500	2885	2969	2866	7200	3560	3422	2992	3187
CNAG_03847	7864	8720	6964	13482	20769	13054	8176	8489	9178	18297	14512	15995	9655	14572	9167	16697	15018	10764	7481	9808	7678	14930	15269	13170	6170	15116	7173	19046	11274	15676
CNAG_03848	1942	1906	1807	3494	4071	3301	1266	1325	1474	1733	1155	1614	2417	3319	2254	3874	3373	2760	1302	1664	1513	1710	2048	2344	1007	2612	1207	1469	1478	1434
CNAG_03849	9889	9004	8659	7403	11140	7841	9416	9929	10800	8218	5784	6727	11462	14926	10812	10607	7804	5733	8560	9100	9639	6973	7744	7936	7047	17791	8773	8820	7327	7806
CNAG_03850	8311	8225	7625	5959	9225	6244	7309	7645	9349	6414	4555	5236	10223	11907	9211	8663	6608	4920	7553	8042	8386	4780	5368	5850	6333	16181	7666	6210	6200	5769
CNAG_03851	2961	2824	2527	3387	5133	3529	2738	2983	3269	4112	2949	3143	3425	3938	3077	4984	3506	2727	2158	2519	2739	2921	3245	3498	2378	5673	2835	4018	3599	3799
CNAG_03852	2371	2301	2179	2592	3785	2827	2525	2739	2518	4057	2399	3619	2937	4231	2821	3780	3038	2036	1779	2262	2175	2193	2260	3171	1642	4626	2034	3274	3096	3259
CNAG_03853	17250	17428	15805	16085	26798	16885	15183	14918	20297	15858	14413	13617	21355	25842	19903	22065	15846	13610	16056	18615	17389	13750	15299	14945	13267	31281	16361	18149	14734	16804
CNAG_03854	3855	3829	3484	3296	6289	3889	3084	3544	4819	3752	3205	2774	5080	5111	4512	5423	3758	3110	3442	4233	4246	2808	3153	3274	3514	8389	3983	4051	4160	3956
CNAG_03855	756	735	709	836	1379	986	980	716	987	632	544	669	725	1107	744	1426	976	668	571	782	684	623	662	692	657	1390	798	771	666	705
CNAG_03856	74954	69081	69619	31815	48624	38957	105751	97087	118768	70731	49693	62808	78889	103832	73167	52075	38010	30026	70903	77558	77097	28276	33897	35967	67137	174600	88362	63250	60956	56474
CNAG_03857	106604	87915	87612	21296	27573	22672	213277	225468	247612	47974	32607	43925	118993	173234	120779	25622	21788	17333	120681	141323	131751	15434	19673	22434	142643	376138	180311	33167	51828	28797
CNAG_03858	25200	23654	21794	14845	24955	16593	31410	27532	51828	23587	23287	18605	29548	35614	29767	20637	14070	13165	30507	40540	30483	17936	19591	17764	32687	73316	37985	29849	26329	25580
CNAG_03859	7675	8137	7572	72522	130764	83366	5702	5520	5534	19801	13910	17144	9254	12727	8533	125236	93938	60781	4612	5139	5296	51228	59809	60180	4048	9934	4955	20387	20778	16480
CNAG_03861	28269	25367	25215	17413	27202	19572	21546	24098	31370	10682	9930	7997	31003	38585	29993	24673	16436	15104	27668	26993	26798	11282	13574	12394	20431	46939	24456	13087	11308	10928
CNAG_03862	6163	6627	5485	3569	5245	3441	6890	6171	7106	2896	2063	2307	6971	10910	7109	4448	3702	2657	5603	7480	6141	2908	3068	3076	4632	11638	5900	3111	2162	2169
CNAG_03863	11365	10713	10014	4435	6590	5106	9241	8017	12180	3468	3141	2501	11689	13903	10995	6422	4220	3766	10236	10538	10784	4043	4159	4481	7932	19430	9927	4867	3473	3790
CNAG_03864	10332	9722	9276	8792	16363	10955	7797	9646	11510	12186	10337	9452	12468	13308	10821	15025	9674	7594	8423	9288	9727	11583	12287	10060	8041	19946	10677	13921	11213	13267
CNAG_03865	10778	12340	10448	9787	17314	11020	8917	12958	14575	16479	14807	11735	15007	18128	14615	14336	10255	8995	11325	15799	11736	13216	15291	10346	9461	21988	10834	19399	11347	17568
CNAG_03866	2957	2855	2653	4027	4671	3601	3090	3140	3788	2269	1881	1757	3218	4212	3040	5119	3872	2509	2498	2836	2969	3901	3768	3780	2322	5854	2847	2942	2121	1945
CNAG_03868	4829	5763	4673	2734	3821	2684	6828	6024	6163	3494	2156	3308	6171	10804	6052	3522	2928	2207	4487	6497	5228	2489	2596	3277	3968	9813	4466	2767	2331	2240
CNAG_03867	0	0	0	0	0	0	0	0	0	0	0	0	0	0	0	0	0	0	0	0	0	0	0	0	0	0	0	0	0	0
CNAG_07966	815	819	784	905	1548	1048	548	497	1057	767	739	508	848	909	820	1316	913	840	694	951	781	735	856	785	624	1313	764	958	652	793
CNAG_03869	2628	2861	2623	1608	2755	1891	2280	2433	3266	2236	1752	1719	3412	4244	3309	2555	1594	1362	2359	2974	2620	1413	1619	1783	2100	4958	2628	2391	2203	2278
CNAG_03870	8376	8321	7801	2692	4343	2985	7822	7373	9784	2313	1812	1694	10134	12605	9707	4081	2658	2287	7511	8758	8594	2231	2322	2364	6294	15930	7785	2553	2161	2218
CNAG_03871	2368	2433	2083	1022	1988	1253	1953	1760	3550	1056	1115	704	3072	3363	2763	1514	850	1097	2626	4056	2880	820	955	1008	2379	5079	2760	1420	1164	1064
CNAG_03872	5716	5204	5301	6195	10050	6981	5406	5353	7174	7295	5589	4999	6799	7254	6205	9573	6507	5213	4613	5238	5462	6129	7143	6289	5200	12492	6347	7544	6519	6944
CNAG_03873	10071	10455	10346	19747	39009	23532	9404	12666	16706	85795	82201	63256	13181	14262	12528	33626	17164	15321	7813	9300	8825	78762	62833	39498	13024	30613	15753	107033	56863	103505
CNAG_03874	2703	2688	2712	8513	10591	8535	2722	4803	3671	3934	3432	2611	3098	4299	3134	11486	7893	6627	3137	2583	2216	7659	9354	5545	2214	5222	2446	5545	1863	4618
CNAG_03875	2733	2697	2223	2656	4198	2708	2315	1509	2537	3207	2745	2361	2784	3570	2718	3333	2494	2381	2224	2959	2257	3120	3226	2466	1742	3886	1829	3713	2398	3270
CNAG_03876	11807	12046	11526	24480	36524	25761	9249	10502	15369	28705	25548	22876	16066	18763	15057	31450	21696	18617	11197	13565	12502	24532	27465	24579	9486	23218	11364	35753	27328	30900
CNAG_03877	7990	8905	7694	4383	8200	5417	7718	7982	12324	4847	4512	3721	10896	13774	10818	6530	4716	4583	8978	12517	9864	4045	4698	4993	8136	19039	9191	5813	5529	4911
CNAG_03878	2039	2356	2024	1583	1604	1513	2151	1662	2562	787	662	481	2232	2787	2182	1752	1506	968	2267	2540	2222	1270	1348	1958	1608	4181	1991	1231	798	803
CNAG_07482	7655	7546	7264	10451	16722	11142	6031	8667	9387	24554	19341	17780	10341	10515	9360	15854	10887	7951	5962	6873	6933	17028	16983	12700	6406	16776	7826	26032	17062	25129
CNAG_07483	4156	3643	3245	6827	9940	7381	4222	3173	4611	4125	3646	3220	3616	4757	3809	8090	6440	6388	3320	4516	3511	5228	6048	5679	2777	6299	3499	4775	4857	3876
CNAG_03881	9842	10593	9835	11410	21708	13862	7789	11347	12030	45522	35825	35017	14473	15912	12524	19245	12833	9085	6998	8830	9395	31357	30021	20153	9190	23203	11122	51362	30090	50630
CNAG_12177	21	36	23	15	35	27	40	27	36	78	37	51	17	41	42	31	21	14	27	41	48	27	45	40	26	65	32	66	59	51
CNAG_03882	3812	3870	3732	5870	10288	6456	3056	3309	5738	5000	4886	3786	5116	5014	4418	8916	5726	4983	4260	4843	4600	4793	5104	4608	3354	8375	4456	6695	5122	6086
CNAG_03883	1196	1391	1141	1678	2891	1913	851	866	1488	1954	1958	1842	1550	2031	1390	2318	1837	1752	1533	1923	1426	2024	2191	2042	924	1852	948	2585	1594	2104
CNAG_03884	11826	9952	10136	13775	20881	14155	8882	8656	10421	10211	7022	8407	12530	15443	11689	19795	14627	11094	8229	9348	9189	12761	13983	13936	6899	17069	8450	10844	9174	9521
CNAG_03885	7568	9446	6808	4186	7430	5070	10579	7488	11321	5335	4558	4933	9455	14966	9042	6079	4540	4275	8270	12614	8580	3080	4204	4686	7124	15995	7979	6005	4892	5150
CNAG_03886	6338	6170	5536	4872	7625	5405	5986	5195	7437	4486	3552	3453	7052	8515	6435	7206	5128	4099	5406	6083	6207	4043	4477	4782	4716	11838	5903	4804	4393	4278
CNAG_03887	1575	1604	1294	1463	2218	1573	1705	1752	2012	1571	1144	1496	1842	2575	1952	1917	1679	1254	1442	1904	1610	1070	1265	1265	1413	3341	1488	1469	1246	1279
CNAG_03888	11458	10328	10609	8433	15372	10613	10266	9847	14033	11621	8768	9022	13370	14658	12055	14316	9509	7756	9691	10940	11015	8172	9620	9592	9181	23522	12103	12381	11409	11453
CNAG_03889	965	879	801	1017	1787	1402	674	683	1212	3250	2869	2364	1067	1211	1050	1513	1063	906	847	1161	949	1205	1210	1444	759	1858	1004	4066	2614	4010
CNAG_03890	3062	3026	2757	2234	3291	2550	2542	2300	3406	1921	1584	1509	3338	3845	3111	3280	2229	1703	2756	3186	3013	1750	1976	2160	2415	5871	2893	2289	1739	2007
CNAG_03891	40199	35631	32083	39110	69485	46992	26607	21645	37038	17976	14733	12449	38531	42579	36462	65688	40458	36045	34190	33505	33800	25425	30781	24791	24376	61360	31778	19477	18873	18537
CNAG_03892	13216	13871	12213	9315	15736	10479	12924	9865	16569	6514	5703	5160	13639	18338	13848	13144	9468	8902	15407	16161	14419	5756	7180	6980	10446	24284	12764	6269	6060	5913
CNAG_03893	3212	2707	2735	4322	6242	4158	3367	2643	3373	3366	2317	2809	3200	3867	2905	5857	4792	3524	2368	2496	2554	3244	3563	3496	2119	5164	2543	3308	3208	3094
CNAG_12178	8	4	6	18	18	5	6	19	17	18	10	21	13	13	8	27	29	13	8	15	18	5	11	8	2	26	17	12	9	17
CNAG_03894	66	69	45	1119	1868	1146	75	77	84	608	335	446	105	78	71	1536	1213	731	56	79	63	802	866	816	39	168	97	431	275	399
CNAG_12179	107	144	118	370	554	328	171	145	172	266	176	201	159	197	109	432	332	260	147	117	135	256	280	347	120	292	113	215	150	195
CNAG_12180	67	102	95	107	110	105	86	81	88	77	72	44	86	145	100	103	91	87	86	112	99	97	111	123	62	137	79	106	56	84
CNAG_12181	569	423	343	158	111	103	445	153	335	49	81	10	339	515	408	135	98	103	321	379	211	77	116	56	197	375	200	70	39	67
CNAG_03896	2003	2002	1827	1526	2576	1705	1654	1858	2533	3631	3109	2557	2683	3350	2550	2382	1771	1329	1922	2437	2170	2163	2373	2165	1563	3988	1847	3990	2533	3850
CNAG_12182	427	457	341	467	732	533	560	447	457	1185	825	1010	628	829	532	688	568	390	360	506	381	811	928	709	399	848	364	1155	722	1164
CNAG_12183	2169	2292	2001	2180	3281	2222	1333	1777	2056	2317	1968	1919	2610	3297	2513	2991	1946	1621	1267	1882	1645	2924	2970	2393	1363	3291	1407	2608	1646	2281
CNAG_12184	10	9	7	4	13	9	17	4	12	8	5	16	16	16	4	8	20	15	8	8	7	4	0	7	8	13	5	10	7	12
CNAG_03897	2100	2153	1804	1440	1774	1589	1981	1431	2808	1270	1435	920	1958	2461	1839	1690	1034	1033	2245	2572	2033	1789	1664	1952	1641	3783	2132	2164	1084	1617
CNAG_03898	1773	1756	1394	1508	1997	1683	2427	1214	2186	1291	965	985	1562	2086	1553	2074	1531	1232	1680	1817	1706	1287	1234	1103	1334	3131	1758	1541	907	1188
CNAG_03899	21579	19260	19096	11830	20995	13187	17060	18279	20552	12627	9473	9719	25759	28674	22731	21034	12684	9870	18123	18529	21388	13850	14188	11821	15078	42193	20859	12194	10642	11709
CNAG_03900	5394	5646	5010	4185	7962	5347	4018	4325	7533	5923	6067	4573	7081	7675	6974	6324	4023	4029	5269	7097	5713	5182	5200	4363	5154	11309	5986	7987	5438	6830
CNAG_03901	2160	2429	2129	2170	3459	2157	1929	1979	3160	3193	2447	2443	2876	3403	2625	3121	2024	1845	2006	2473	2321	2311	2410	2206	1815	4820	2260	3690	2420	3000
CNAG_03902	12751	12552	12017	5942	10414	7125	9191	16434	12205	2932	2377	1919	17432	20410	15605	9564	6288	5124	11328	12204	11238	4999	6380	5619	8443	20811	10179	3460	3039	2821
CNAG_03903	3544	3072	2946	2938	4346	2802	3122	2756	4215	3945	2804	2744	3581	4161	3275	4053	2772	2275	2819	2821	3517	3245	3215	2977	2846	7120	3727	4620	3191	3990
CNAG_12185	255	234	171	151	245	178	241	386	212	119	70	51	308	428	272	257	223	156	187	197	248	72	138	159	137	355	162	81	73	69
CNAG_03904	8725	8769	7918	4913	9645	6475	7270	6632	11070	5522	4958	3906	10647	11399	9927	8380	4794	5087	8466	9782	9654	4729	5687	4912	7033	17425	8718	7080	5716	6054
CNAG_03906	636	677	566	488	707	482	887	587	1011	499	431	436	675	1009	650	565	365	355	657	900	695	379	444	376	695	1480	736	475	404	396
CNAG_03905	1016	1236	903	677	1058	769	1556	1091	1509	791	647	776	1146	1840	1066	759	749	593	1168	1610	1027	506	591	707	889	2106	996	858	603	616
CNAG_03907	2150	1967	2004	1788	2713	1887	3658	2374	3510	1708	1187	1656	2348	3239	2008	2457	1907	1469	1927	2659	2600	982	1287	1517	2109	5523	2801	1585	1720	1580
CNAG_12186	0	0	0	0	0	0	0	0	0	0	0	0	0	0	0	0	0	0	0	0	0	0	0	0	0	0	0	0	0	0
CNAG_03908	4285	4588	4273	3626	5931	3995	4789	4722	6889	3802	2958	2850	5731	6709	5549	4858	3386	3097	4833	6154	4858	2556	3186	3351	4285	10605	5092	3886	3814	3159
CNAG_03909	1887	1814	1673	3799	5343	4232	3193	2394	3464	2557	2016	2425	1839	2449	1804	4798	3526	3000	2393	2405	2170	2701	3498	2560	2209	4874	2493	2761	2300	2229
CNAG_03910	2638	2482	2652	5478	9226	6652	2724	1779	4100	19714	17339	13758	3097	3326	2802	9484	4826	4182	2251	2944	2700	17112	14152	7370	2440	5973	3095	26582	11055	26431
CNAG_03911	1348	1228	1169	1534	1818	1490	2383	1866	2255	3265	1951	2843	1200	1941	1253	2085	1591	1000	1295	1446	1358	1589	1472	1691	1376	3205	1508	2598	2527	2291
CNAG_12187	0	0	0	0	0	0	0	0	0	0	0	0	0	0	0	0	0	0	0	0	0	0	0	0	0	0	0	0	0	0
CNAG_03912	726	771	511	838	883	988	1000	322	979	442	468	356	526	687	510	987	659	531	1074	792	623	549	663	798	623	1316	685	732	398	466
CNAG_03913	1153	1187	992	1698	2245	1493	1386	1258	1153	1883	1555	1775	1211	1622	1119	2242	1848	1160	896	863	831	1623	1459	1180	690	1682	847	2091	1252	1683
CNAG_03914	3500	3559	3250	5739	9052	6419	4364	4092	4382	6310	4697	5742	4125	5406	3622	8933	6683	4608	3340	3778	3894	5590	5992	5731	2817	6980	3633	6202	5259	6096
CNAG_03915	1445	1632	1386	3790	4253	3195	1612	1859	1697	2730	1794	2246	1665	2011	1419	4709	3443	2387	1649	1501	1501	3638	3974	3083	1084	2896	1346	2756	1312	2498
CNAG_03916	78776	68673	68693	31114	51651	37330	53945	57285	86198	22777	18382	15194	85989	92129	78004	50110	33169	28080	68869	68582	71923	22418	28301	24936	58867	144302	73207	25488	22260	22933
CNAG_03917	5987	5369	5282	4269	7181	4868	5509	5050	6775	3881	2845	3014	6439	7324	6028	6239	4585	3866	4879	5252	5259	3129	3834	3671	4754	10981	5477	4183	3874	3647
CNAG_03918	13129	10889	11038	6143	9199	6331	12277	13126	15595	8633	6331	7183	15471	17729	14124	9109	5953	4855	10088	11765	12168	5345	5972	6870	10510	26989	13189	8239	8955	7761
CNAG_03919	2242	2077	2035	1821	2655	1815	1862	1655	2655	1483	1396	1309	2330	2769	2412	2274	1753	1823	2077	2324	2081	1286	1822	1373	1751	4065	2042	1805	1316	1428
CNAG_03920	14078	13494	12331	40190	63392	48659	10992	12449	15999	20765	16866	16141	13942	16248	13951	59237	38760	41879	11808	12214	13457	22966	35937	29322	10385	26365	12978	20353	24595	17872
CNAG_03921	970	950	849	949	957	872	897	800	1109	528	561	398	787	1176	827	1156	921	554	935	814	952	1144	959	1250	722	1792	892	891	531	705
CNAG_12188	155	115	103	177	222	201	90	106	80	155	61	126	148	293	104	327	256	175	106	117	80	119	142	173	59	140	57	75	118	79
CNAG_03922	1975	1721	1589	779	1412	1044	1744	1610	1651	1579	979	1218	1805	2702	1694	1375	1155	812	1456	1415	1272	827	931	936	1045	2371	1196	1421	1155	1276
CNAG_03923	2150	1818	1815	1356	1818	1331	2706	2664	2884	2805	1720	2192	2407	3134	2217	1741	1269	947	1763	2305	2528	1106	1197	1673	2113	5737	2578	2523	2206	2251
CNAG_03924	1518	1662	1393	2244	3393	2454	1580	1864	2499	1599	1432	1319	1956	2157	1979	2893	2241	2033	2082	2273	2094	1430	1679	1726	1812	4288	1998	1722	1851	1468
CNAG_03925	1579	1811	1417	1359	2716	1889	2017	1484	2312	1749	1260	1560	1896	2645	1881	2061	1778	1437	1747	2557	1919	963	1394	1444	1484	3538	1638	1463	1441	1227
CNAG_03926	6729	6492	5865	4242	6326	4445	5549	4772	7016	2852	2719	2002	7205	8045	6587	6108	3913	3200	5901	6406	6639	3714	3782	4068	4869	11684	5928	4156	3107	3091
CNAG_03927	2386	2898	2727	2695	4528	3040	2963	2761	4010	2336	2183	2333	3296	4683	3526	3765	2758	2403	3302	4290	3511	1722	2131	2345	2750	6539	3427	2490	2598	2174
CNAG_03928	6084	5737	5423	4389	8209	5409	5260	5294	6481	4735	3284	3504	7103	8098	6331	7894	4973	4105	4911	5326	5944	3653	4433	4307	4393	11718	5955	4397	4776	4393
CNAG_03929	2557	2321	2234	2013	2860	2131	1929	1873	2872	1879	1575	1539	3047	3355	2795	2715	1951	1725	2018	2621	2415	1464	1777	1870	1941	4635	2255	2289	1802	1829
CNAG_03930	1566	1750	1464	1526	1848	1318	1976	1900	2024	2123	1554	1970	2091	2724	1949	1758	1577	1031	1327	1679	1626	1063	1266	1579	1443	4004	1790	2108	1612	1635
CNAG_03931	23099	23873	20547	16716	23866	17564	26125	22715	23167	15621	10643	14184	25378	37923	23549	23264	19553	13225	19274	20740	21589	13199	15615	17395	15989	40285	20269	15263	12541	12885
CNAG_03932	2614	2592	2492	1753	3167	1916	2494	2395	3737	3108	2374	2262	3437	4152	3309	2413	1881	1625	2298	3560	3013	1624	1996	2333	2312	5968	2709	2971	2687	2856
CNAG_03933	1212	1119	1085	724	1454	1021	924	759	1902	594	882	516	1371	1514	1270	1211	732	904	1309	1758	1228	730	823	782	1005	2251	1118	1063	898	862
CNAG_03934	0	0	0	0	0	0	0	0	0	0	0	0	0	0	0	0	0	0	0	0	0	0	0	0	0	0	0	0	0	0
CNAG_03935	17119	15756	15809	12777	25911	16166	11805	15055	23815	27417	26764	18843	23925	21234	20396	23927	13000	11988	15346	17525	18875	26572	27238	16599	16146	38801	20352	37037	24448	36738
CNAG_03936	21990	20322	19779	21024	36462	27533	17714	18338	30869	13561	13031	9665	24747	25747	24180	33491	21495	19782	21890	23323	22103	14741	17681	18130	18340	42428	22477	16852	18247	14445
CNAG_03937	4765	6512	4881	2452	4632	2686	6359	5963	8707	9863	8141	7548	6419	9791	6399	3531	2548	1957	5950	9026	6800	6007	6149	4814	5910	13307	6297	10236	6130	8521
CNAG_03938	1692	1416	1560	1034	1581	1309	1340	1637	1685	1005	841	890	1847	2204	1984	1504	1034	915	1443	1433	1329	773	881	846	1010	2329	1137	1037	865	830
CNAG_12189	58	77	77	33	33	14	64	39	32	11	6	31	80	116	87	9	25	19	18	47	47	11	5	11	21	43	14	14	12	18
CNAG_12190	92	88	66	45	77	61	107	104	122	62	43	24	92	134	75	75	57	31	109	132	64	10	46	44	92	157	101	39	46	32
CNAG_03939	15305	14601	13585	42408	78398	52150	13442	15170	18446	32543	24178	24418	18791	20404	16717	75306	48791	38079	14657	14846	15484	34700	45543	44167	11519	29112	15005	37886	39845	35448
CNAG_03940	6063	6027	5578	5072	9177	5583	4761	4126	6592	3246	2710	2198	7011	7509	6384	7989	5200	4087	5681	5954	6427	4250	4168	4080	4388	10935	5787	4555	3510	3656
CNAG_03941	8811	8886	8227	4508	7764	5511	6353	6494	11796	3378	3445	2418	11424	11386	10614	6701	3914	4329	9928	11859	10326	3337	4115	4034	8497	18544	9960	4408	4570	3909
CNAG_03942	20638	18776	18206	12104	18459	12970	19130	19457	22608	16467	11014	12746	22659	27332	20383	17933	12448	10095	16550	17323	18892	10113	11875	13064	15833	39781	19481	15918	15066	15674
CNAG_07485	5820	6035	5565	4346	6741	4768	5943	6068	8896	4826	4231	3756	7875	9277	7757	5990	4388	3983	5957	8139	6248	3739	4375	4068	5391	12958	6220	6287	4686	4915
CNAG_03944	19501	17418	16184	10539	16306	11197	14223	10229	19629	6696	6197	4242	18700	20880	17471	16020	9957	8598	17487	17378	18710	9985	10948	8724	12668	32052	16647	8943	6035	7560
CNAG_03945	278	298	267	209	323	224	386	339	261	278	130	232	286	494	320	353	257	203	292	287	272	215	165	217	160	503	278	217	205	179
CNAG_03946	3083	2920	2931	4069	6872	4152	2699	3300	3941	4890	3927	3545	3664	3789	3285	6033	4025	3294	2572	2731	2781	4229	4291	3585	2808	6931	3511	5606	4223	4959
CNAG_07486	2234	2313	2138	4154	6737	4437	3024	3189	3801	5329	3778	4809	3200	4309	3034	6279	4995	3640	2274	3198	2483	3027	3777	4340	2526	6012	3098	4726	4813	4278
CNAG_12191	43	51	32	13	25	27	48	38	82	15	6	12	73	84	43	18	13	25	110	73	49	15	10	10	46	92	46	12	19	16
CNAG_03948	15230	11626	11919	6722	11666	7962	8244	8749	12403	5350	4752	4070	15411	16014	14731	11210	6889	6321	11089	11228	12092	6167	7494	6355	8842	19702	11041	6308	6196	5866
CNAG_03949	856	643	619	732	933	643	600	461	760	298	324	188	737	761	628	820	619	609	623	635	615	300	359	390	486	1153	594	493	373	299
CNAG_03950	25130	22690	21704	19471	30892	22103	23402	22987	30206	22337	17339	18242	28873	31922	25752	30395	19768	17431	21452	23751	25098	15242	18981	20430	20598	51264	25531	23722	22298	22379
CNAG_03951	2685	2880	2265	3724	4750	4089	1790	1396	3705	1400	1794	831	2771	2920	2721	4278	3185	3263	3173	3630	2559	2199	2691	2597	2159	4331	2289	2319	1619	1561
CNAG_10024	3	2	0	5	9	12	8	6	10	2	3	0	10	8	2	6	8	7	3	6	0	3	3	5	2	7	11	18	6	5
CNAG_03952	8956	9239	8022	11018	18705	13206	6734	8498	13620	5903	6663	4613	11701	13966	11806	14539	10746	11360	9824	14008	9754	6774	8470	8301	8603	18530	10009	8198	7910	6360
CNAG_03953	54	95	92	225	278	166	87	86	123	99	97	126	102	153	117	282	208	128	135	127	65	148	160	178	65	160	83	133	104	126
CNAG_12192	243	235	243	489	443	331	505	475	398	523	259	536	238	527	214	377	418	321	283	347	246	190	211	407	219	503	224	376	330	247
CNAG_03954	1754	2009	1557	1508	2060	1653	2110	1497	2221	1177	994	907	1828	2677	1907	1933	1574	1292	1780	2383	1859	1199	1231	1905	1369	3550	1462	1328	962	1011
CNAG_03955	2284	2165	1902	1202	2164	1557	2516	2360	3434	1589	1279	1018	2607	2564	2183	1807	1283	1114	2289	2852	2730	1106	1296	1466	2314	5419	2775	1885	1729	1413
CNAG_03956	3136	3598	2883	3207	5904	4003	5125	4016	7305	2994	2663	2466	4296	5835	4269	4764	3500	3148	4258	6712	4742	2130	3004	3357	4299	9976	5006	2783	3803	2526
CNAG_03957	8538	8433	7781	2420	3674	2761	7490	6593	9311	1543	1344	1388	10058	12346	9344	3354	2358	2149	8666	9952	9660	1510	1737	1856	6212	15620	7950	1865	1760	1448
CNAG_03958	16585	19030	15919	18053	33281	21010	16399	20670	21813	27846	22033	24042	23108	33508	23875	24716	20167	16838	14229	22528	17093	21351	23429	19438	15336	35517	16381	27224	19366	22746
CNAG_03959	16842	17492	15792	7300	12545	8134	14907	14537	19905	9876	8596	8596	20301	26320	19954	10362	7939	6456	16619	20354	17669	7150	8128	7727	13995	32787	16088	10452	8350	9240
CNAG_03960	5434	4970	4838	7458	12976	9208	4904	5370	7761	4733	4027	3740	6311	7309	5892	12390	8272	6812	5298	5751	6297	5137	6310	6652	5030	12952	6479	5335	6250	4682
CNAG_10025	0	0	0	0	0	0	0	0	0	0	0	0	0	0	0	0	0	0	0	4	0	0	0	0	0	0	0	0	0	0
CNAG_03961	4070	3974	3617	2671	3513	2542	4073	3533	4384	2122	1454	1820	4169	5882	3972	3493	2802	1982	3659	4111	3697	1895	2131	2329	2844	7010	3421	2129	1956	1774
CNAG_03962	4355	3774	3600	2906	4240	3163	3409	3388	5364	1939	1491	1323	4559	4659	3862	4131	2669	2663	3483	3845	4200	1696	2065	2119	3506	8878	4613	2313	2501	1967
CNAG_03963	1090	986	967	1430	2102	1499	1057	872	1270	1023	795	782	1175	1469	1129	1964	1330	1190	935	1022	1143	1077	1218	1110	821	1998	1011	1241	898	853
CNAG_03964	1533	2014	1405	3595	4061	3321	1483	1374	1961	1715	1697	1231	1689	2072	1527	4204	3108	2145	1834	1617	1509	3345	3409	3396	1131	2816	1390	2607	1343	1774
CNAG_03965	6280	7654	6140	5322	8569	6326	6042	6098	9248	4487	3896	3928	7900	10717	8079	7129	5311	4825	6630	9831	7317	3336	4410	4805	5712	13795	6407	4763	4654	4204
CNAG_03966	3584	2625	2576	4124	5593	3862	5109	2917	4068	2525	1909	2053	2687	3320	2491	5383	3843	3437	2869	3058	2728	2330	2707	2903	2545	5605	2903	2642	2842	2374
CNAG_03967	10478	10669	9812	7500	13735	9038	8931	8474	12369	12450	10208	9349	12897	15025	11793	11681	8409	6802	9058	11794	10791	9070	10084	8996	8444	20124	9883	13469	10294	12055
CNAG_03968	7745	8290	6651	4403	6459	4229	8116	7209	8493	4430	3282	4055	8450	12179	8235	5525	4632	3673	6562	8734	7397	3132	3815	4099	6039	14371	6689	4328	3629	3555
CNAG_07487	34754	30729	31304	14604	24071	19515	18909	18277	41220	7852	9356	5436	36240	33315	35972	21115	14081	15339	34301	36051	35791	7715	10556	11691	26766	59803	34132	10011	12464	9318
CNAG_07488	5946	5658	5085	5004	7318	5291	5784	5233	6717	4128	3272	3328	6261	8082	6023	7127	5363	4281	5567	5971	5790	3348	4234	4010	4628	11238	5880	4585	4037	3662
CNAG_03971	47	49	59	92	108	75	86	46	92	97	61	42	28	62	39	90	55	64	50	51	59	49	68	69	49	135	70	44	55	41
CNAG_03972	7	8	7	19	18	19	23	26	24	23	20	26	6	14	7	13	16	14	13	12	14	7	8	7	8	27	16	23	12	23
CNAG_12193	18	13	13	31	52	56	32	28	49	50	56	49	25	48	23	41	23	34	28	35	16	20	27	22	54	83	53	46	53	33
CNAG_03973	6438	6242	6142	6041	11656	8094	6107	6840	9862	7698	6898	5127	8364	8171	7653	11105	6436	5892	6933	7633	8031	5672	7177	7268	6508	16565	8441	9191	9453	8663
CNAG_03974	11362	11433	10517	12226	22716	15143	7740	6714	13480	23955	21044	16787	15355	16296	14649	21110	12925	10991	9021	11852	10330	22698	23164	18195	9154	22228	11265	28176	20753	26794
CNAG_12194	330	279	256	812	1565	1024	256	272	428	719	802	682	372	385	377	1291	834	909	302	441	291	727	831	640	217	513	252	977	649	737
CNAG_03975	5540	5649	4872	2707	2841	2676	5609	4310	6056	2299	2055	1480	5246	6722	4741	3492	2475	1677	4872	4554	5308	3370	2810	4392	3938	9841	4994	3878	1826	2441
CNAG_03976	5425	4991	4903	5707	10586	6484	4234	4886	5491	9462	6659	7561	6175	7132	5951	9243	6142	4771	4248	4937	4745	6467	7011	6139	3964	9852	4910	8176	7713	8178
CNAG_03977	3258	2113	2210	1961	2155	1742	4071	2190	3267	710	496	657	2206	3018	2164	1948	1703	2029	2183	2514	2175	498	718	835	1922	4374	2113	473	813	529
CNAG_03978	8686	7292	7671	8693	14047	9150	6763	8465	8988	7949	5961	6418	10343	11733	9705	13002	9007	7302	6924	7488	7741	7277	8267	6939	6266	16234	7919	7848	7272	7208
CNAG_03979	2057	2107	1755	1516	2602	1701	2082	1484	2692	1614	1501	1318	2227	2610	2089	2196	1693	1424	1985	2424	2124	1162	1513	1547	1655	4043	2001	1950	1498	1565
CNAG_03980	30	47	44	74	120	82	27	30	38	85	63	63	50	88	59	132	92	45	58	38	55	49	90	67	24	54	27	46	41	86
CNAG_03981	6366	6504	6332	7666	11537	7867	5512	6115	7635	5535	4403	4347	8415	9726	7916	10531	7707	6097	5483	6552	6210	5507	6098	5862	5000	12249	6168	6205	5232	5005
CNAG_03982	3719	4002	3633	2501	4459	3122	3394	3146	5770	1683	1770	1271	4554	5160	4741	3747	2404	2545	4200	5582	4529	1970	2178	2296	3693	8424	4073	2382	2169	1836
CNAG_12195	118	127	125	144	195	136	147	126	229	156	116	116	194	231	204	185	108	123	177	306	146	131	136	139	148	359	185	152	119	110
CNAG_03983	58624	62172	56615	31734	62271	41416	41493	40177	52562	26127	20631	20123	69792	82970	65543	56648	36023	29169	44297	51553	50870	30993	33810	33070	37335	92109	45445	28594	22227	25030
CNAG_03984	3598	4276	3401	3417	6422	4273	3886	3611	6378	3854	3747	3246	4719	5939	4462	4947	3564	3390	4243	6487	4228	3037	3781	3650	3943	8513	4359	4704	3994	3769
CNAG_03985	5117	4620	4552	3746	7048	4707	3623	3394	6739	2673	3116	1774	5382	5626	5471	5937	3477	4120	5947	6105	5336	2913	3539	2961	4394	8808	5235	3505	3229	2706
CNAG_03986	8490	9748	8221	5549	7510	5679	9513	8553	10482	3879	2706	3036	10114	13911	9403	6716	5867	4600	8957	10559	9242	3381	4431	4591	6614	16423	7895	3625	3311	3023
CNAG_03987	9526	10069	9176	7797	12308	9154	7765	7673	10157	11951	9277	9810	12295	13832	11045	12062	8344	5954	7827	9236	8919	10168	9989	9811	7264	18252	9136	14036	9293	12434
CNAG_03988	791	786	771	597	991	683	906	868	1050	767	651	707	1066	1375	1003	869	529	528	883	952	943	562	603	604	734	1929	980	915	866	729
CNAG_12196	45	47	43	61	87	98	35	26	57	276	238	215	56	88	65	97	56	63	42	41	39	136	124	104	28	70	57	360	138	317
CNAG_03989	2685	2308	2298	3122	4946	3738	3020	2011	3926	3236	2523	2295	3027	3071	2695	4261	2835	2800	2437	2910	2722	2107	2592	2456	2350	5662	2846	3471	3098	3154
CNAG_03990	650	690	594	412	756	596	799	807	1140	1059	1045	858	723	1144	720	647	554	399	721	1066	830	356	468	525	864	1725	810	1167	966	1005
CNAG_03991	6947	7856	6556	6039	11581	7112	6399	8520	10590	14675	12918	11436	9519	10893	8460	10091	6809	5315	5960	7880	7725	11168	12141	8350	7486	18743	9212	16768	12257	15735
CNAG_03992	4557	4716	4039	6427	10993	6998	4748	5467	6222	12958	10311	9550	5530	6631	5284	9564	6737	5389	3704	4921	4170	8940	9208	7614	4528	11109	5162	14166	9562	12755
CNAG_03993	3200	3629	2820	1217	1781	1459	5221	3024	5283	860	671	617	3410	4848	3131	1515	1211	1377	3538	5100	3614	470	747	748	2970	6518	3207	819	947	669
CNAG_03994	4701	4834	4777	5053	7969	5424	4095	5116	5623	8964	6267	6740	6288	7861	5702	7209	5296	3912	4007	4420	4710	6199	6039	5756	3900	9510	4704	8599	6294	8414
CNAG_03995	3442	3381	2800	1682	3558	1972	2106	2891	3998	6845	5973	4260	4059	4744	3692	2980	1641	1516	3301	3065	3125	4896	4099	3288	2556	5852	3267	8824	4724	8641
CNAG_03996	20505	18375	18517	32445	50446	37904	13036	17621	21372	29866	24985	21677	25105	25446	23361	51049	32512	27686	18986	20348	21176	25744	32065	30734	14676	37407	18311	35067	31980	31578
CNAG_03997	311	289	273	237	213	179	344	200	272	117	77	143	273	324	267	212	198	205	366	423	266	103	141	110	222	405	225	110	72	87
CNAG_03998	8995	8873	8173	9344	13637	9488	9706	10223	11247	8188	6327	7418	11900	15047	11272	12423	10120	7719	7593	10275	8903	7228	8516	8317	7334	18899	8648	8066	7608	6424
CNAG_03999	12261	13244	11972	3328	5613	3488	6566	8925	10024	5500	4404	4554	18300	21271	18632	4514	3496	2609	10833	13209	12204	3295	3721	4610	6636	15433	7960	5369	5086	4944
CNAG_04000	3530	3424	3155	3099	4502	2936	3622	3839	4263	1849	1373	1505	4216	5554	4077	4165	3149	2238	3587	3897	3738	2295	2366	1786	2633	6743	3355	2198	1133	1728
CNAG_04001	8809	10167	7971	5974	9432	6165	10943	9495	11584	5899	4521	5276	10920	16095	10729	7628	6389	5124	9895	12125	10542	4270	5039	5758	7775	19080	9371	5320	5155	4631
CNAG_04002	8350	8849	7289	5992	12520	7977	6279	6851	12057	4890	5195	3748	10660	11833	11158	9618	6019	6568	9001	13385	9499	4400	6003	5616	8209	17073	8858	6274	6314	5126
CNAG_04003	4375	4064	3820	3213	5221	3636	4420	4175	5784	5788	4734	4734	5177	6009	4548	4865	3531	2843	3694	4569	4181	3438	3800	3872	3548	9403	4626	6161	4960	5828
CNAG_04004	177583	204999	172213	26623	37744	29839	164512	107486	196641	16431	13559	11443	194421	261133	193949	36183	26367	22860	175943	217239	184781	16033	20371	24115	129447	311450	151990	17723	14371	13272
CNAG_04005	12364	10989	10833	10318	16778	11678	10402	11224	13736	7990	6155	6742	14606	16370	12826	16217	10917	8604	10887	11542	12008	8319	9969	8796	9230	23529	11759	8147	8703	7379
CNAG_04006	497	496	469	160	208	167	428	487	550	587	372	285	692	737	566	207	131	117	401	529	511	124	164	205	333	892	409	517	275	530
CNAG_12197	234	281	253	269	317	227	461	351	381	340	199	381	296	504	278	322	288	164	314	320	339	207	173	171	267	567	257	276	217	217
CNAG_04007	0	0	0	0	0	0	0	0	0	0	0	0	0	0	0	0	0	0	0	0	0	0	0	0	0	0	0	0	0	0
CNAG_04008	940	1012	820	797	1163	700	1373	1224	1234	1612	981	1447	1163	1691	990	1064	865	470	825	986	970	624	759	988	840	1974	1043	1205	1078	1218
CNAG_04009	29742	26508	27695	39166	77971	52850	20345	26873	35694	34698	29588	24299	38032	35413	34111	73485	42643	39444	25967	26051	30230	37352	44763	37314	24878	61146	31283	39390	41160	38205
CNAG_04010	8087	7547	6902	5494	7823	5649	4930	4823	7985	4934	4585	3598	8777	9294	8100	7563	5078	4201	6671	7269	7544	4395	4949	4714	5194	13011	6601	7121	4932	6254
CNAG_04011	33327	38036	31514	5557	9089	6979	24606	15964	44935	3171	3840	1961	35328	40130	35131	7934	4950	5867	40315	50694	37218	3595	4903	4496	30450	55607	32647	4641	3455	3483
CNAG_04012	2263	2668	2273	2594	4192	3003	2554	2638	2945	3781	2655	3176	3005	3937	2657	3774	2950	2046	2657	2634	2552	2289	2850	3002	2129	5026	2466	3514	3051	3361
CNAG_04013	3136	3091	2982	4220	6672	4227	3277	3158	3640	7689	5705	6627	3673	4974	3691	6106	4619	3429	2574	3217	3029	5660	5297	5145	2591	6510	3205	7874	5755	7232
CNAG_04014	13637	13606	11966	4794	7558	5345	11215	10755	14465	5129	4136	3864	16181	18689	14731	6921	4681	3971	11642	13596	13403	4424	4892	4850	9795	25762	12087	5514	4458	4811
CNAG_12198	164	183	111	185	207	166	252	226	295	443	349	323	194	286	186	242	170	106	200	264	214	206	154	275	155	406	167	450	324	303
CNAG_04015	148	173	144	58	89	96	136	93	290	196	268	96	238	197	219	88	52	40	283	344	307	102	100	93	200	397	234	401	114	189
CNAG_04016	43	66	68	58	36	47	104	51	79	317	136	288	91	114	30	39	30	28	71	59	42	54	80	62	49	116	37	149	97	126
CNAG_12199	301	245	339	195	342	192	405	471	494	1888	1358	1470	415	552	420	279	231	201	277	417	310	538	411	371	300	698	335	1580	765	1264
CNAG_04017	12170	14232	12707	6103	11017	7203	10151	12837	16081	10931	10074	9051	17557	23176	17924	8697	6365	5252	14211	18272	14956	6567	6860	6819	10662	26390	12713	13338	7793	11147
CNAG_04018	17413	10397	11080	5763	6266	4550	27263	16192	16154	4595	2719	4609	9263	18432	9832	5818	6312	5802	11182	10608	8198	2386	2747	2068	8415	16926	9514	4725	2828	5392
CNAG_07489	9723	10292	9227	9231	13057	8456	11426	13073	12838	25685	17449	21827	12887	15779	10816	12469	10056	6398	8658	9306	9704	16183	15579	11615	8866	22135	10982	24941	15073	25101
CNAG_04021	33453	33188	30525	5997	9077	6759	26425	16781	35994	3499	3135	2070	33787	40838	34271	8174	5392	5304	32798	36642	33285	3859	4577	4858	23957	51395	28238	4337	3702	3010
CNAG_04022	10147	9679	9263	8080	13005	8721	6726	7028	8788	8427	6006	6488	12833	14586	11154	12606	8545	6917	8188	9300	9339	7087	7778	8019	6434	16842	7964	9413	8187	8821
CNAG_04023	6222	6300	5899	5869	8689	5902	6969	7541	7672	8045	5331	6731	7488	10048	6864	8524	6423	4527	5895	6544	6501	4757	5562	5843	5046	12891	6046	7257	5949	6207
CNAG_07490	81	95	64	156	329	190	101	89	102	223	214	183	67	114	64	218	186	181	66	129	62	173	165	181	88	146	83	323	281	200
CNAG_04024	1051	880	774	5140	9169	4951	651	759	1124	9135	7229	7696	1157	1307	1044	6348	4313	3994	902	1118	819	5821	7695	9852	725	1714	823	8608	11509	7246
CNAG_04025	8265	9479	8722	69822	129954	82862	9425	17131	20194	92019	81380	73137	13257	15052	12979	106414	72914	62657	11492	15531	12436	72461	100046	108675	11111	26490	13235	91302	119484	80431
CNAG_04026	2148	1689	1628	757	1265	1075	2247	1615	2992	648	645	612	1965	2391	1981	1114	911	746	1768	2382	2216	609	750	828	1924	4904	2498	736	1064	739
CNAG_04027	102708	109505	95629	48058	91778	49607	117814	146207	99882	26430	17681	27569	130785	208340	111477	69571	63039	39724	94063	97056	105680	40465	55855	36334	67899	174781	86499	26851	24882	28284
CNAG_04028	60012	55870	53566	32318	56803	39268	42550	51869	67482	29735	24530	21501	69855	78322	66063	51813	33848	30458	55311	63383	61411	25908	32960	31687	45991	114513	57248	33905	31754	30409
CNAG_04029	2470	2001	1862	704	1019	755	3405	2304	3787	998	766	944	2198	2543	1928	893	690	626	2221	2827	2344	532	649	833	2049	4964	2573	1126	1268	1063
CNAG_04030	1943	2439	1964	1875	3173	2453	2745	2310	3988	2037	1830	1516	2546	3564	2417	2625	1807	1906	2611	3536	2620	1097	1475	1794	2164	4776	2315	2112	2258	1790
CNAG_04031	1562	1565	1481	1270	2282	1534	1392	1191	1860	1365	1098	809	1908	2058	1714	1880	1314	1051	1597	1839	1743	1093	1307	1178	1284	3058	1561	1379	1171	1391
CNAG_04032	23104	21463	20392	19331	31104	21112	16697	19474	25788	15591	12998	11807	27086	28273	24134	30435	19312	16098	20259	20296	22208	18303	19955	17337	17367	44244	21896	19614	15673	17331
CNAG_04033	15238	15042	13920	7550	12561	8291	12504	14241	20782	9922	8439	7110	19415	20433	18000	11397	7719	6376	14611	16377	16924	8862	9313	7680	14454	36090	18178	11676	8840	10624
CNAG_04034	761	807	829	1298	2190	1613	591	728	1110	1794	1649	1325	1136	1273	1092	1940	1212	1176	912	1133	883	1158	1346	1381	788	1749	972	2355	1998	1991
CNAG_04035	2641	2631	2365	2129	2979	2064	2226	2142	3024	2473	1935	1798	3170	3395	2445	2696	2038	1587	2120	2506	2518	2271	2306	2454	2106	5289	2464	2843	2137	2503
CNAG_04036	1052	1023	892	2110	3263	2599	1253	1195	1410	3831	2650	2978	1120	1586	1079	3199	2590	1743	943	1092	985	2039	2328	2477	925	2341	1189	3444	2736	3245
CNAG_04037	4490	5610	4027	4401	5710	4158	6475	4544	6610	3084	2782	2358	5011	8078	4897	4960	4411	3359	5396	6935	5033	3503	3985	4246	4123	9067	4187	3849	2107	2517
CNAG_04038	1362	1324	1187	1889	2717	1926	973	1156	1776	1198	1109	596	1751	1755	1725	2743	1678	1617	1211	1327	1202	1609	1833	1296	1019	2366	1288	1734	1092	1413
CNAG_12200	480	561	460	1855	2489	1828	827	888	805	1394	1119	1700	641	985	580	2533	2411	1640	678	661	569	1554	1500	1552	408	1143	557	1484	1001	1375
CNAG_04039	9798	11438	9918	19369	32361	20560	6775	8066	13342	13800	15292	9341	14156	14983	14014	26814	17353	17533	11397	12653	10157	20757	22805	15617	8783	19291	9467	20580	11843	17014
CNAG_04040	8613	7983	7858	10453	16708	10924	10011	9031	11906	14842	11404	11723	10291	12019	9144	15297	11271	8445	7348	9027	8938	10503	11533	10839	8235	21320	10263	16902	12933	15205
CNAG_04041	5175	4904	4580	6608	8254	6166	4210	4903	5566	3525	2910	2554	5945	6842	5335	8773	6546	5387	5035	4687	4763	5300	6533	4555	3940	9335	4456	3984	3194	3565
CNAG_04042	1279	1311	1104	3106	4012	2520	1217	1182	1380	1537	1222	1303	1358	1598	1273	3664	2732	2338	1280	1196	1032	2081	2619	1825	964	1951	1015	1730	1203	1216
CNAG_04043	5698	8110	6024	2003	3428	2596	6179	5585	8154	16716	13776	13342	8836	13071	7584	3063	2087	1845	5714	8841	6573	6470	5862	4292	6253	13586	6384	19882	8361	17134
CNAG_04044	2414	2790	2167	3378	4086	3231	2901	2312	2832	2425	1756	1807	2666	3768	2549	4200	3336	2217	2488	2714	2530	2740	3161	3316	1903	4896	2223	2800	1929	2083
CNAG_04045	5322	5757	4811	3238	4612	3396	5753	5860	6070	2767	2203	2540	5853	8297	5675	3986	3619	2794	5132	6464	5421	2490	2946	2840	4194	10121	4906	2756	2283	2234
CNAG_04046	2051	2340	2016	1526	2398	1700	1936	1654	3201	1310	1502	1131	2467	2921	2410	1858	1406	1346	2585	3217	2438	1123	1264	1180	2177	4558	2405	1883	1525	1503
CNAG_10026	1	0	0	2	6	3	0	2	2	8	3	0	0	1	0	5	0	0	1	1	0	3	3	0	0	0	0	2	2	0
CNAG_04047	4067	3533	3730	2441	3700	2442	3707	3601	4022	2923	2050	2488	4821	6330	4532	3200	2633	1802	2934	3491	3458	1780	1704	2420	2644	6776	3367	2673	2790	2492
CNAG_04048	9114	8908	8136	4933	7674	5465	10430	9438	11305	4464	3036	3074	10225	13051	9505	7461	5129	4248	8411	9362	9827	3471	4090	4623	7324	18360	9219	3918	4100	3734
CNAG_04049	2903	2974	2679	3223	4839	3603	2971	2317	3512	2723	2073	2034	3317	3826	3147	4532	3678	2594	2671	3255	2997	2688	3037	3355	2356	5907	2760	3378	2615	2617
CNAG_04050	9653	11278	9018	5530	9237	6615	10977	8167	13781	4867	4154	3682	11449	15527	11213	7893	5922	5354	10517	15412	11166	3714	4653	5285	8980	20326	10212	5275	4736	4041
CNAG_04051	7395	7111	6645	4698	7085	5461	6623	5866	9080	4595	3537	3264	8786	9285	7808	7208	4835	4204	6604	7346	7717	3321	3988	4676	6326	15583	7647	4914	5017	4079
CNAG_04052	2443	2158	1899	1709	2294	1810	2512	2109	3184	924	775	800	2471	2528	2119	2306	1531	1579	2209	2236	2723	987	1310	1387	2087	5554	2737	1206	1141	1064
CNAG_04053	2460	3049	2436	4290	5144	3820	3208	2635	3577	3937	3372	3031	2830	4310	2822	4616	3783	2837	2804	3637	2773	3936	4272	4345	2412	5469	2413	4716	2477	3563
CNAG_04054	5926	5041	5101	4777	8508	5763	3876	4150	6373	4514	4756	3473	6273	7076	6196	7769	4294	4484	5187	5848	4943	4622	4676	3921	4166	8628	4960	6030	4572	5120
CNAG_04055	2230	2493	1936	1665	2635	1712	2431	2352	3143	2576	2004	1908	2445	3169	2485	2339	1660	1392	2140	2920	2485	1842	2027	1796	1994	4998	2373	2519	2112	2530
CNAG_04056	4682	5116	4248	3240	4894	3189	4667	4236	6048	2607	2195	2124	5844	7155	5464	4176	3414	2522	5006	6124	5436	2152	2873	2643	4481	10800	4926	3222	2796	2528
CNAG_07491	16161	14463	13970	14923	15034	12573	13484	9156	11043	15086	9740	12201	15289	22331	14360	15787	15091	11919	7594	8778	8691	10474	11187	16809	7333	18116	8927	14870	15019	9901
CNAG_04059	473	507	489	564	837	605	607	502	544	650	654	798	675	894	557	871	569	469	454	510	428	518	594	626	422	999	557	746	764	756
CNAG_04060	616	511	525	547	805	564	483	537	633	684	489	552	777	868	642	878	511	437	520	492	444	510	526	464	405	1065	510	958	720	875
CNAG_07492	367	299	280	1164	1942	1251	244	322	309	1896	1630	1266	400	613	455	1647	1305	967	455	447	374	1508	1535	1360	297	719	384	2257	1592	2321
CNAG_07493	894	891	766	3278	4892	3270	896	855	781	5159	4054	3794	994	1627	1119	4693	3874	2580	1139	925	986	4665	4456	3654	736	2050	1014	6150	4037	6118
CNAG_04062	5841	5849	5376	8593	9897	7398	5094	5105	6290	5043	3942	3352	5644	7458	5472	10929	7800	5377	5791	4883	5192	7861	7544	8229	3940	10463	5206	6323	4367	4721
CNAG_04063	1895	2053	1569	2564	4451	2810	1887	1450	2812	4531	4292	3745	2268	2672	2178	3496	2697	2204	1956	2591	1949	3653	3451	2447	1783	4115	2198	5914	3086	5413
CNAG_10027	0	0	0	0	0	0	0	0	0	0	0	8	0	0	0	0	0	0	0	0	0	0	0	0	0	0	0	0	0	0
CNAG_04064	11899	12113	10225	9779	14465	10803	9515	7962	12095	6600	5844	5861	12846	16381	12460	13890	10468	8665	10485	11365	10784	6914	7799	7309	7370	18102	9628	7672	6440	6516
CNAG_04065	722	809	753	982	1766	1098	965	787	1272	1667	1368	1410	984	1589	1085	1393	1033	949	915	1301	951	1094	1338	1186	795	1748	847	1719	1282	1416
CNAG_04066	14747	13714	14124	6655	12599	9645	10768	10426	17918	7719	7535	5387	18114	18656	17126	11338	6356	6580	15718	16207	15748	6299	7004	7474	12060	27859	15800	9779	9480	7878
CNAG_04067	2603	2725	2433	2146	3875	2209	1720	2143	3702	11287	11762	8354	3823	3863	3387	3130	1740	1792	2050	2812	2382	8384	7160	3542	2531	5963	3006	16368	6492	14684
CNAG_04068	29602	32960	28183	4889	7627	6299	26343	18313	28390	3407	2545	2115	30604	39478	29300	8084	6142	3982	26906	26312	27871	3250	3970	5055	18941	46802	24176	3678	3574	3138
CNAG_12201	245	250	220	304	331	272	266	294	274	351	225	418	287	413	316	340	470	203	260	262	258	275	300	270	183	443	178	311	252	247
CNAG_04069	9602	9054	8679	7609	9587	6760	8120	8297	9731	8228	6328	6055	10721	12611	9878	9640	7155	5549	7676	8187	8902	7731	7399	6959	6983	17372	8506	9518	6217	8241
CNAG_04070	162	145	170	155	326	123	158	146	211	482	319	426	204	175	202	322	189	164	131	175	167	463	379	230	193	416	200	492	368	494
CNAG_12202	29	12	37	34	19	12	59	41	72	45	46	51	28	34	29	39	8	30	26	61	30	37	24	15	44	67	40	53	30	34
CNAG_04071	10597	11373	9878	5150	7780	5304	10820	10660	13443	5258	3834	4481	13183	17762	12653	6542	5517	4315	10307	13557	11713	3663	4115	4729	8413	21637	10419	4963	4806	4491
CNAG_04072	3277	4112	3033	4074	4346	4138	3953	2631	4628	1718	2133	1109	3283	5000	3150	4315	3759	3008	3900	4828	3378	3523	3814	4381	2757	6216	2977	3289	1475	1933
CNAG_04073	10058	9787	9635	8785	12618	8795	10531	11099	11994	9202	6357	8099	12291	16455	10564	12114	9362	7198	8716	10237	10237	7377	8045	8562	8224	20689	9985	9742	7518	9035
CNAG_12203	246	414	260	1135	1551	1120	426	478	392	1562	1216	1470	350	632	409	1462	1182	796	559	391	398	1532	1729	1160	250	580	250	1396	739	1155
CNAG_04074	35315	32674	32712	17202	30641	21670	28301	30203	40475	15655	11776	11121	42312	46651	37563	28475	19201	16308	32217	33611	37468	13751	15952	16943	26910	69247	35346	15335	17267	15111
CNAG_07494	3919	4470	3867	5277	5310	4440	4538	3375	4300	3443	3320	3105	3777	5688	3641	6293	5194	3102	3753	3799	3927	5450	5003	7161	2698	7451	3414	5199	2933	3556
CNAG_04076	1708	1865	1707	1294	2108	1550	743	1064	1622	8647	7668	6542	2147	1844	1972	2081	1401	1020	1064	1410	1509	6715	4651	3515	1306	3128	1456	9611	5151	9954
CNAG_04077	1617	1983	1719	7508	13770	9188	772	951	1478	6068	6621	4640	2425	2289	2062	11022	7906	8211	1560	1834	1645	7375	8111	7849	1025	2014	1022	8248	7355	6896
CNAG_12204	18	17	11	26	55	27	32	30	32	36	61	22	26	31	30	49	54	30	18	49	33	21	44	58	27	47	14	34	42	41
CNAG_12205	190	316	234	824	1247	990	440	349	512	858	572	888	281	506	295	1073	928	684	295	483	340	522	588	776	217	582	270	763	712	514
CNAG_04078	7072	6292	6521	3389	5978	4000	5499	5734	7623	3655	3026	2729	8160	9315	7741	5631	3605	2921	6655	6681	7421	3151	3338	3542	5530	13361	6789	4224	3621	3756
CNAG_04079	4674	4108	3968	2593	3911	3027	4334	3636	5496	1717	1160	1307	4710	5642	4533	3933	2787	2416	3966	4409	4689	1501	1896	2003	3647	9084	4819	1467	1868	1460
CNAG_12206	18	10	9	83	103	71	15	38	16	11	6	26	30	15	16	92	83	82	18	14	17	39	41	31	7	20	12	6	10	12
CNAG_12207	48	78	59	161	270	172	90	91	123	128	85	93	88	80	106	186	158	114	95	120	90	114	110	116	71	146	85	138	112	105
CNAG_04080	7199	7759	6199	6513	9506	6399	6468	6787	7777	4198	3350	3576	8016	11871	8115	7103	6695	5365	7565	9620	7837	3987	5488	5274	5757	12764	5732	4938	3627	3743
CNAG_04081	1600	1579	1435	1204	2196	1396	1504	1595	2039	1911	1336	1234	2036	2173	1894	1942	1419	1105	1468	1695	1638	1194	1324	1496	1376	3481	1514	1932	1811	1771
CNAG_04082	16975	15303	14769	13810	22202	15683	14439	12541	17875	9143	7145	7026	16580	19324	15391	21442	14885	12248	14307	14865	15168	8660	10377	11303	12347	30705	14838	9997	9910	8949
CNAG_04083	8041	8340	7355	5838	9907	6092	5230	6809	7743	9521	7063	6608	10804	11933	9037	8966	5990	4549	6569	7754	7524	8259	8420	6273	5497	13971	6748	10482	7209	9946
CNAG_12208	225	258	244	421	725	397	213	223	340	564	621	254	238	295	276	484	368	366	249	284	224	358	405	374	216	395	246	835	424	643
CNAG_04084	5	19	17	59	57	42	5	0	14	25	27	12	6	11	10	26	29	32	15	4	3	32	29	18	9	32	9	42	15	41
CNAG_12209	690	870	701	1027	1602	1157	502	518	598	1122	836	966	1058	1684	1053	1421	1042	811	540	736	627	725	967	966	384	874	496	1121	871	1041
CNAG_04085	560	533	560	4952	5229	3472	968	622	637	3894	3589	3255	652	943	616	4937	4516	3040	475	495	545	6174	4823	3208	474	1142	536	5128	2006	4530
CNAG_12210	429	574	471	744	1145	736	168	198	173	829	614	716	672	882	647	1106	812	514	170	310	300	1349	1322	786	181	433	187	1004	518	928
CNAG_04086	49	40	38	246	185	132	22	34	54	216	196	150	66	84	54	215	146	141	43	35	49	285	206	223	16	54	36	317	120	247
CNAG_04087	844	766	798	631	764	570	1862	1144	1147	843	620	818	710	1409	659	725	616	462	764	804	768	628	585	549	658	1659	894	912	575	837
CNAG_04088	332	275	254	142	173	145	589	402	440	202	193	204	265	442	222	195	152	151	258	329	302	148	173	152	342	681	334	229	243	226
CNAG_04089	6268	6734	5885	3336	5616	3923	5586	4624	9572	2615	2332	1744	7754	8243	7332	4559	3302	3275	7020	9139	7298	2445	3243	2978	6043	13698	6979	3230	2880	2809
CNAG_04090	16082	17082	15713	17092	27477	17258	20216	21254	19353	41309	23964	35429	21407	28687	18261	26141	21007	12090	13192	15606	15658	22092	22870	24413	13572	35463	16513	35364	24733	33669
CNAG_04091	1494	1419	1201	302	248	230	4272	2902	3599	292	169	303	1391	2088	1378	242	159	222	1576	2110	1762	206	226	248	1956	4848	2476	239	235	170
CNAG_04092	776	1081	836	2905	5039	2892	2725	2400	3301	11948	8846	9332	1409	1818	1180	4158	3178	2252	1562	2073	2122	5463	5438	4282	2048	5222	2459	12421	8106	11335
CNAG_04093	670	728	605	1637	2512	1829	1148	1247	1224	2598	1563	2335	770	1096	710	2347	1763	1249	600	730	758	1335	1634	1598	811	1866	921	2554	2339	2323
CNAG_12211	5	3	5	10	9	3	72	37	51	396	239	274	7	33	5	11	4	6	17	25	25	44	37	16	45	84	37	276	95	223
CNAG_04094	2032	2395	2164	1447	2164	1307	2997	3028	3425	1502	1291	1371	2494	3721	2615	1725	1419	1019	2124	2790	2431	1128	1007	985	2193	4882	2413	1599	1276	1364
CNAG_04095	948	1019	1050	1250	1475	1189	952	941	1325	1313	1068	854	1340	1283	1128	1595	1043	743	882	976	1067	1366	998	1145	775	2200	942	1690	958	1422
CNAG_04096	971	815	829	11416	21621	13720	1156	1541	1794	6842	5764	5424	1065	1258	1029	18556	12490	10165	946	1103	1206	7313	8583	7931	1133	2908	1628	7470	8281	6782
CNAG_04097	596	613	573	929	1560	1019	815	888	1327	1356	1332	986	707	850	666	1335	941	769	812	993	891	843	955	840	906	2262	1009	1850	1295	1479
CNAG_04098	10600	10474	10523	5877	10753	6712	5883	7626	10963	38071	35389	25236	15803	14818	13018	10118	5460	4407	9337	10765	11102	27079	25350	19908	7223	18144	8812	52556	28068	50245
CNAG_04099	13420	10865	12154	7023	13894	9283	4861	5736	14792	3198	3934	1836	14830	9986	13728	13530	6184	8288	11672	10131	12601	5500	6853	5574	10192	23524	12608	5028	5455	4371
CNAG_07495	9	38	22	354	584	359	43	34	36	206	220	159	20	46	16	628	395	337	19	54	27	294	330	145	22	99	49	313	174	262
CNAG_07496	63	87	50	934	1668	927	113	111	201	721	632	566	85	162	105	1751	1122	963	94	126	124	923	980	526	111	353	159	874	527	812
CNAG_07497	522	589	552	1371	1576	1121	618	497	615	1453	891	1119	682	834	563	1699	1625	956	571	516	626	875	1040	880	341	1090	608	1220	903	1150
CNAG_12212	2358	2842	2380	2346	3087	2285	4186	3487	3458	1678	1460	1865	2999	5243	3055	2792	2578	1608	2459	3097	2558	1777	1983	2751	2023	5090	2579	2047	1703	1325
CNAG_06984	2477	2566	2095	4789	6197	4574	1318	1426	2354	3542	3349	2315	2705	2900	2426	6621	4304	3318	2220	2285	2259	6248	5633	5001	1484	3673	1820	5298	2865	4183
CNAG_06983	6797	6609	6065	7016	11888	7916	7077	7030	8317	11511	8456	9577	8061	9733	7578	11030	8218	6111	5666	7074	6805	8877	9421	8509	5728	14209	6505	12238	9429	10863
CNAG_07498	5635	5595	5089	7973	14201	8523	3166	4075	5187	8044	7761	6158	7743	7860	7324	11772	7278	6890	4665	6563	5180	8274	8917	8706	3796	8035	3937	9948	8346	8558
CNAG_06973	1180	1056	1043	3095	4345	3401	2048	1886	1683	4553	2670	4775	1436	2334	1426	4417	4114	2468	1011	1109	1184	1930	2645	3378	959	2266	1107	3522	3441	2997
CNAG_07499	12531	10860	10385	13824	22423	14764	10937	13184	14091	24283	20000	19486	14717	18076	13571	20743	14781	11374	9435	11871	11637	21175	18920	17276	9769	23315	11391	28200	21627	22437
CNAG_12213	79	108	88	166	312	243	83	124	149	56	27	55	105	158	103	257	210	201	116	141	113	63	78	91	84	211	79	31	46	33
CNAG_06963	10583	9240	9273	574	513	588	5717	3381	7769	518	623	324	8486	8525	8470	526	314	414	6881	7680	6337	305	258	447	4423	9551	5538	1643	474	775
CNAG_12214	111	84	91	18	17	21	118	116	207	91	62	48	185	210	159	8	14	21	97	192	120	34	32	21	134	251	141	79	25	65
CNAG_06962	1416	1743	1386	2866	4834	3236	1940	2149	2384	9132	6961	8029	2076	2830	1996	3996	3162	2367	1501	2176	1802	4786	4693	4401	1445	3881	1943	9415	5719	7957
CNAG_03083	2119	2669	1993	1953	2721	1738	3841	4040	3946	11129	7712	9571	2824	4404	2755	2202	1995	1298	2583	3662	3017	4565	4231	3869	2972	6737	2960	9820	6072	8247
CNAG_03082	147	205	120	102	153	106	166	156	207	518	435	543	203	285	146	132	68	62	152	204	161	270	262	225	125	321	148	618	328	527
CNAG_12215	0	0	0	0	0	0	0	0	0	0	0	0	0	0	0	0	0	0	0	0	0	0	0	0	0	0	0	0	0	0
CNAG_03081	5548	5620	4860	4110	5677	4111	4889	4601	5615	4078	3416	3426	5918	7158	5423	5495	4301	3110	4728	5064	4916	3621	3607	4228	3865	9545	4790	4753	3591	4116
CNAG_12216	54	126	46	421	717	500	145	87	161	103	99	57	96	141	67	621	476	467	280	166	134	268	461	225	75	172	61	75	77	70
CNAG_03080	14278	14980	12935	10130	12887	10429	16066	13479	17841	13971	10309	11077	16305	21718	15400	13000	10064	8037	12852	14727	14599	7946	8314	9597	10278	27368	13334	15474	11183	13629
CNAG_03079	4867	4538	4494	4213	7159	4651	5260	5944	5855	3080	2473	2736	5705	7701	5825	6423	5039	3700	4656	5227	5321	3773	4205	3785	3938	9819	4992	3552	2621	3157
CNAG_03078	10121	10297	9419	10209	15585	10816	8221	9339	10008	10802	7107	9133	13922	19223	13736	14616	11538	7852	7370	9325	8103	10130	11783	10871	6139	16082	7492	10349	8060	9600
CNAG_03077	0	0	0	0	0	0	0	0	0	0	0	0	0	0	0	0	0	0	0	0	0	0	0	0	0	0	0	0	0	0
CNAG_03076	1648	1588	1494	3417	4515	3446	2180	2393	2353	4360	2671	3846	2127	2915	2077	4579	3709	2369	1479	1816	1791	2551	2742	3158	1500	4272	1758	3376	3572	3572
CNAG_03075	2781	2842	2789	3832	5001	3658	2744	3056	3131	3690	2554	2927	3559	4406	3399	5098	4032	2953	2215	2731	2974	3093	3279	3100	2008	6011	2841	3429	3148	3162
CNAG_12217	22778	20645	20120	13994	17802	12776	21530	26892	30898	19615	17619	16237	29946	39537	31879	16087	13229	11108	23008	32695	24475	12056	14124	12695	20544	48309	23558	22338	17475	17165
CNAG_03072	122150	111109	108680	118698	211092	153393	91774	90184	139972	62191	52148	43148	134650	144311	125533	204416	129318	113044	113141	119577	122933	73126	97984	95971	92618	234159	121684	68096	75304	61244
CNAG_12218	405	451	343	1214	1902	1366	480	406	512	1542	1164	1521	444	632	410	1573	1317	955	452	492	363	842	999	1070	385	739	366	1562	1230	1283
CNAG_03071	983	984	881	691	975	632	1088	1026	1605	544	412	394	1126	1307	1003	838	619	601	1038	1356	1393	406	494	544	1127	2835	1393	498	628	544
CNAG_03070	2389	2418	2002	1048	1744	1133	2636	2019	3076	2400	1948	1974	2472	3187	2426	1571	1079	963	2125	2540	2303	1490	1494	1439	2031	4796	2399	2590	1742	2322
CNAG_03069	7390	9019	7363	14866	26958	19532	9334	9233	13995	21557	20819	17672	9688	13504	10653	20959	15038	15698	8926	13694	8859	13103	16209	17467	9318	19177	9520	23786	23655	21069
CNAG_03068	1589	1806	1495	1181	2049	1284	952	1124	2098	870	940	569	2019	2253	2073	1363	952	959	2003	2449	1849	676	875	828	1591	3424	1570	1076	1074	861
CNAG_03067	1223	1289	1064	43628	68853	43926	1123	1572	1784	35571	27163	32534	1643	1955	1639	58522	49064	35118	1072	1231	1105	28230	32381	29541	1081	3001	1369	36568	27315	33321
CNAG_07502	13666	12560	12046	4101	4552	4203	9608	7902	15508	2485	2608	1761	13134	14174	12147	4902	3166	3037	12511	12171	12660	3459	3247	4839	9329	22976	12015	4410	2783	2975
CNAG_03065	14635	16336	12416	16541	27664	18303	18023	14518	22798	17184	15096	15350	16980	24408	16761	20958	17973	16050	14804	23558	15083	11751	15092	15288	14028	30810	15477	19713	16294	15628
CNAG_03064	1749	1917	1664	2451	2522	2261	1912	1291	1911	1380	1193	875	1531	2273	1575	2889	2281	1378	1762	1573	1691	2333	2275	2608	1159	2884	1452	1818	960	1074
CNAG_03063	14981	13427	13251	9033	12870	9164	14566	13156	16259	9159	6160	7761	16538	20002	15018	12280	9287	7391	12226	13826	13970	6969	7746	8035	11572	30457	13945	8724	8322	8419
CNAG_07967	2291	2168	2003	1543	2314	1591	3533	3022	2742	2383	1400	2179	2446	3603	2130	2273	1835	1247	2013	2164	2375	1508	1728	1659	1963	4981	2344	1996	1810	2046
CNAG_03061	3423	2679	2474	10149	10833	9640	3848	2970	3988	2907	3179	2005	2417	3158	2286	11601	8288	6916	3560	2476	2625	7299	7958	4990	2461	5552	2998	4690	2292	3413
CNAG_12219	19	45	22	197	212	182	56	45	45	258	209	169	23	64	36	222	194	162	110	63	41	209	229	136	29	61	17	251	153	208
CNAG_03060	1769	1802	1770	7978	12740	9226	1460	1581	2436	8866	8555	5884	2575	2566	2233	11649	7492	6361	2088	1846	2138	12402	12290	8375	1595	4010	1903	12177	7485	11268
CNAG_03059	4745	4324	4509	15706	25991	16647	4584	4513	5346	22483	15467	18544	5113	6333	5549	23348	17433	12653	3487	3949	3683	15882	17714	15025	3639	8997	3959	20626	17014	20207
CNAG_03058	72186	99500	78018	44465	73571	45989	37310	52788	71906	222681	199710	164507	109046	147952	103005	58054	42083	31152	52480	92368	64052	199533	179032	132442	49816	111711	47545	260620	124818	216852
CNAG_03057	275	195	220	495	714	470	424	229	239	516	357	574	217	316	202	693	625	415	176	223	178	459	403	581	162	363	234	541	568	467
CNAG_12220	22	29	24	30	17	33	25	26	46	25	19	17	39	43	29	18	8	14	30	50	30	13	13	21	20	34	16	10	15	28
CNAG_03056	651	862	689	583	887	649	1362	1292	1725	1311	855	1302	884	1180	813	755	711	503	1161	1667	1322	540	799	1230	983	2553	1157	1097	1323	941
CNAG_03055	2657	2775	2296	2178	3069	2329	2591	2328	3221	2004	1829	1315	2778	3874	2758	2902	1968	1609	2769	3066	2618	2187	2314	2417	1988	4673	2489	2691	1378	1871
CNAG_03054	1101	1118	1053	2130	3489	2295	1379	1449	1782	3973	3332	3427	1377	1887	1455	2860	2264	1606	1150	1641	1344	2448	2835	2320	1141	2607	1318	4269	2719	3839
CNAG_03053	57858	56311	49642	10006	14651	11082	44200	31628	54577	5384	4338	3768	56416	63778	49337	14278	10238	8345	49403	48296	52184	6093	7498	8179	36453	85319	43951	6068	5199	4557
CNAG_03052	20467	17593	17741	14483	21925	15089	14827	15302	20508	15588	12663	11010	22050	24947	19948	21285	13876	11720	16767	16662	17816	15080	15923	14348	13636	33802	16793	19243	13326	16223
CNAG_03051	3076	2718	2746	2574	4129	2965	5265	3006	6284	6945	5668	4846	2971	3423	2792	3895	2426	2070	2786	3374	2868	4350	4032	3140	3566	8569	4718	9092	4830	8368
CNAG_03050	2190	2011	2021	6720	10969	6307	2068	2414	2849	6732	4917	4889	2390	3012	2351	9917	6977	5099	1738	1921	1901	6224	6399	5394	1860	4353	2199	7359	5387	6907
CNAG_03049	7971	8739	7295	6639	10196	6796	12473	11326	10806	8330	5652	7970	9259	16256	8928	8590	7398	5573	8137	9600	9510	4503	5405	6648	6956	16686	8356	7514	6510	6152
CNAG_03048	4656	4637	3805	6498	9624	6726	3881	3345	5561	3487	3032	2776	4461	5478	4522	8656	6485	5751	4449	4533	4314	3952	5053	4248	3481	8290	4339	4195	3762	3784
CNAG_03047	4367	4286	3833	689	919	704	5905	5175	6504	792	706	876	5117	7167	5993	855	585	618	4516	6696	4877	423	520	502	4189	9780	4676	724	819	521
CNAG_12222	45	39	42	186	272	131	69	58	72	282	250	213	45	61	53	182	148	228	86	72	65	121	141	155	49	134	54	346	215	338
CNAG_03046	848	840	733	3211	4795	3284	1019	762	968	3886	2567	3223	867	1427	884	4486	3547	2618	591	746	666	2318	2646	2983	733	1624	752	3385	2948	3222
CNAG_03045	4485	4333	3843	3767	5864	4259	3326	4013	4667	4754	4139	3447	5132	6141	4534	5361	3814	3139	4333	4739	4080	4267	4872	3847	3059	7613	3915	6269	3273	5123
CNAG_03044	530	486	427	99	71	71	1105	566	1137	35	22	15	410	680	457	90	46	108	554	860	610	4	38	34	637	1327	704	35	40	22
CNAG_03043	408	463	541	375	447	354	851	437	763	454	308	462	571	917	531	413	344	296	517	601	511	262	209	326	395	1102	559	342	400	256
CNAG_03041	913	886	899	1625	2156	1844	1382	1417	1622	2727	2149	2142	1015	1320	1111	2192	1741	1239	1036	1100	871	1189	1484	1780	917	2095	1035	2800	2183	2475
CNAG_03040	33029	36592	33828	15404	35024	18998	19929	25956	44143	75610	73855	50882	51434	49133	43320	31085	15185	13587	32288	40118	38895	67643	66656	43226	30921	76282	37901	99518	63909	90659
CNAG_03039	3940	3983	3693	2844	4703	3208	4451	4124	5322	5541	4296	4571	4823	6072	4524	4441	3009	2477	3981	4639	4242	4854	4461	3506	3648	8957	4434	6189	4175	5503
CNAG_03038	11726	11437	10591	14254	24503	17230	7198	7259	16308	12587	12767	8879	15030	15735	15479	20350	12791	13792	10973	14798	11299	9759	12399	12123	9986	22548	12022	16379	13967	14524
CNAG_03037	2537	1510	1651	1086	867	791	2447	1129	1991	758	519	528	1326	2157	1636	860	884	1003	1303	1485	834	339	453	372	1024	1969	1155	520	439	522
CNAG_03036	3134	3378	2926	3089	5036	3504	3449	3399	5058	5753	4409	4165	4571	4668	3747	4502	3218	2621	2924	3675	3582	3510	3685	3474	3029	7506	3606	6366	4889	5768
CNAG_12223	520	614	406	683	882	667	558	453	660	912	597	720	560	941	571	760	585	569	545	501	491	338	387	602	355	675	383	767	658	581
CNAG_12224	180	181	165	109	152	130	467	402	471	445	282	603	186	392	191	130	148	91	271	382	235	131	190	237	235	547	230	363	340	251
CNAG_03034	1476	1399	1246	821	1373	1020	1948	1671	1991	1634	1010	1491	1705	2064	1562	1190	985	848	1382	1701	1520	680	808	1069	1413	3461	1609	1671	1380	1404
CNAG_03033	1993	1795	1596	1210	1981	1264	1876	1388	2388	1365	976	1028	2223	2548	1895	1708	1302	1095	1767	1797	1923	896	919	1197	1547	3882	1804	1462	1531	1324
CNAG_03032	4431	5285	4104	3186	5529	3735	4448	4300	7234	3060	2435	2300	5874	7481	5644	4476	3119	3217	5275	7256	5657	2460	3152	2989	4638	10459	5071	3088	3013	2772
CNAG_03031	1747	2078	1707	2187	3083	2367	2646	2283	2473	3275	1899	3011	2359	3458	2319	2602	2553	1741	1499	2652	2169	1471	1894	2449	1775	4240	1996	2462	2432	2061
CNAG_07505	161	113	135	109	113	140	227	175	294	190	209	235	143	257	200	128	81	93	144	180	160	83	110	100	136	285	149	200	232	194
CNAG_03028	1330	1354	1300	1402	1907	1249	1687	1476	1872	1418	1208	1554	1694	2118	1595	1542	1274	970	1304	1604	1341	902	1159	1509	1256	3025	1346	1398	1483	1263
CNAG_03027	9987	9438	9131	9341	14462	9998	8618	9704	11306	8450	6640	6717	11461	13732	10980	13776	9827	8007	8839	9453	9950	6910	7995	8522	7673	18521	9115	8613	8364	7252
CNAG_03026	4276	4695	4304	2861	5396	3470	4323	4665	5082	5420	3866	4646	5935	8157	5474	4462	3377	2522	3632	4527	4433	3568	3925	3194	3394	9236	4246	5501	4356	5041
CNAG_03025	8216	10341	7825	5248	9932	6632	9585	9468	13248	5601	4906	4687	11266	15461	11009	7826	5800	5712	9305	14858	10247	4163	5473	5544	8694	20218	9304	6062	5536	5174
CNAG_03024	22425	19198	19942	26825	43160	30011	21844	23270	29183	37997	27117	28390	26261	29878	22556	42491	27754	23586	19695	21974	22034	25617	30845	25295	20521	51016	25125	37333	33043	37788
CNAG_03023	4387	3554	3242	3241	4032	2908	5101	4193	4981	3065	2030	2629	3710	5099	3448	3920	3130	2688	3134	3624	4034	1771	2122	2143	3435	8848	4330	2863	2442	2681
CNAG_03022	2708	2500	2521	1962	3374	2315	3216	2338	4035	1797	1530	1506	3073	3437	2834	2814	2254	1815	2614	3608	3145	1261	1752	1673	2304	5953	3129	1768	2170	1580
CNAG_03021	216	221	205	460	662	494	294	331	372	872	548	776	244	430	239	564	519	355	217	283	254	294	343	492	203	539	298	795	633	792
CNAG_03020	3123	3653	2936	2993	4762	3275	2880	2843	4843	2801	2767	2240	4074	4921	3812	4178	2824	2818	3540	4921	3556	2248	2733	2684	2872	6786	3136	3370	3314	3001
CNAG_03019	15009	12191	11659	48835	82618	57172	15993	16050	21437	38346	30137	31491	15544	17977	15643	75298	51779	43717	12993	14274	13817	32386	39853	39212	14989	35221	17435	41507	42241	37354
CNAG_03018	4728	4184	4266	6746	10079	7339	4659	4178	5363	5723	4077	4352	5672	6872	5098	9887	6982	5271	3726	4207	4486	5410	6358	5070	3625	9483	4657	5781	5482	5277
CNAG_03017	4420	4557	4293	5151	7846	5111	4659	4588	5174	4825	3165	3928	5143	6795	4547	7379	5549	3867	3709	4352	4592	3958	4707	4753	3413	9072	4514	4546	4216	4096
CNAG_03016	7068	8204	6383	12532	19430	13336	9865	9586	12029	12165	10886	9854	9104	13355	8855	16101	12230	11415	7734	11921	7968	9668	11703	10503	7121	16302	7384	14449	9127	11639
CNAG_03015	28581	26913	27176	6101	9854	7610	24021	15150	34158	3323	3908	2526	29003	33734	29716	8814	4991	6013	32250	33996	29561	4133	5150	4439	22460	44515	27063	4862	3499	3578
CNAG_07968	265	299	243	518	501	524	312	221	267	519	338	391	246	381	229	606	541	326	283	213	204	465	480	476	192	384	175	533	319	418
CNAG_03014	517	668	392	334	544	309	596	574	826	839	545	693	554	978	555	433	419	293	418	751	575	435	386	479	487	1257	520	717	572	693
CNAG_12225	5	3	3	1	3	5	1	2	3	0	4	5	2	0	0	6	1	3	1	2	5	1	4	0	4	1	1	13	1	0
CNAG_12226	15	0	9	3	8	0	37	8	25	18	5	13	6	18	11	7	3	12	8	7	8	2	12	5	6	15	1	5	6	4
CNAG_03013	4644	3802	4020	6866	9506	6751	6110	6358	6983	5291	4288	4294	5014	6058	4646	9550	6804	5311	4518	4748	4918	5642	5907	5369	4934	13214	5999	6677	5171	5618
CNAG_03012	269559	237415	257684	430603	738369	544763	76164	96596	140787	171072	206224	148286	312841	347891	313802	669687	401758	452303	220446	206266	207559	392310	427435	362415	84942	200476	112494	282818	194278	241144
CNAG_12227	240	272	211	244	275	206	146	147	212	333	356	369	263	344	281	242	205	191	383	397	261	216	246	181	149	263	142	396	201	312
CNAG_12228	375	475	382	904	1173	852	196	322	199	1780	1155	2029	486	965	361	989	961	664	355	441	279	1070	1103	1286	163	335	114	1666	979	1332
CNAG_12229	478	423	382	801	1507	1038	313	297	452	1330	1635	1380	491	649	458	1264	970	804	640	679	476	1219	1466	1255	255	673	269	2081	1037	1992
CNAG_03011	1783	2171	1916	9873	17573	10959	1573	2222	2591	3044	2616	2579	2595	3158	2774	13725	10262	8920	2131	2942	2418	6480	8055	7973	1698	4118	2048	3274	3474	2994
CNAG_03010	1127	1135	1061	15996	26516	18309	1074	976	1984	7726	7139	6150	1237	1508	1456	22589	15371	14890	940	1220	1087	7694	9390	10311	1117	2502	1294	8882	10100	7496
CNAG_03009	1124	1273	1143	594	1079	706	1202	832	1926	457	570	495	1293	1853	1464	851	583	682	1341	2039	1468	345	512	482	1132	2180	1196	562	455	504
CNAG_03008	3564	4168	3542	3724	5385	3332	3739	3638	4845	3395	2653	2841	4186	5805	4347	4510	3848	2852	3445	4555	3866	3013	3567	3183	3411	7757	3574	3595	2693	3043
CNAG_03007	255271	253342	232875	90994	174089	108486	203300	228804	466131	49053	51523	31968	315281	336419	331766	142910	85023	100693	309733	441317	328099	68340	84441	72194	296762	637096	334363	55076	69833	45662
CNAG_12230	746	734	637	929	1568	1130	614	541	795	1194	1136	1141	827	1018	859	1343	1080	908	535	873	633	812	995	914	493	1088	615	1218	1084	1199
CNAG_03006	440	372	378	381	536	409	439	344	480	315	343	236	412	577	442	517	346	294	443	409	427	294	334	289	315	861	432	368	369	326
CNAG_03005	308	283	313	325	340	305	417	324	392	383	249	306	316	427	267	407	338	188	311	356	286	276	249	320	234	538	187	411	289	348
CNAG_03004	5932	6177	5457	6054	10436	7069	5761	5955	7549	7662	6098	6384	7179	9306	7058	8994	7235	5275	6021	7914	6864	5473	6170	6445	5278	12650	6085	7623	6380	6820
CNAG_03003	81	111	123	222	250	191	187	166	101	475	256	509	100	159	83	232	197	122	75	88	98	256	228	223	84	210	95	308	254	320
CNAG_03002	3624	4685	3316	5923	9392	6050	4123	5714	5845	12752	10425	10396	4426	6473	4181	8267	6589	5204	3072	3487	3580	11327	10965	7352	4162	10323	4289	13767	7455	13465
CNAG_03001	5034	5498	4930	6175	8512	6394	4859	4015	5928	6680	5500	5009	5806	6605	5051	8719	6056	4370	5074	4693	5269	7079	7237	6810	4036	9709	4843	8298	4956	7320
CNAG_03000	60255	69643	56967	11820	18310	14632	43274	29250	71740	6395	6772	4154	64085	74438	66662	16395	10510	11912	64737	82292	61823	6918	9061	9438	47117	98593	53007	8529	7150	5997
CNAG_02999	1421	1210	1208	2536	3974	2436	1681	1144	1717	4164	2959	3951	1361	1855	1335	3645	2628	1956	1147	1274	1135	3241	2902	2447	1156	2561	1355	4478	3113	4148
CNAG_02998	4011	3497	3305	3434	6169	4105	3303	2648	4397	5149	4079	3598	4343	4698	3906	5819	3522	2949	3072	3556	3692	4557	4488	3526	2962	7461	3785	5999	3741	5169
CNAG_02997	4403	4085	3854	1549	2498	1722	6141	4848	6554	2287	1464	1898	4954	6171	4567	2341	1570	1345	4049	5123	5152	1207	1469	1751	4340	11125	5541	2161	2381	2128
CNAG_02996	5007	6019	4991	2278	3708	2408	3631	4777	5496	7757	6046	6546	8021	10296	7474	3390	2402	1875	4765	6525	5534	4045	3999	3646	3946	9969	4471	8828	5011	7962
CNAG_10028	0	1	0	0	0	0	0	3	0	0	0	0	0	1	0	0	5	0	0	0	0	0	0	0	0	0	0	0	0	0
CNAG_02995	8978	8469	7819	7423	12348	8140	6231	6706	9458	8613	7573	6738	10141	11089	9316	10619	7917	6445	7830	8743	8785	7531	8453	7282	6642	16084	7963	9780	8752	8893
CNAG_02994	40613	38695	37682	35124	58585	39802	28967	32681	35829	44362	31964	32601	51291	58089	44580	60514	41245	29906	31023	32699	36309	39285	44947	41734	27474	69585	33328	42559	39040	39550
CNAG_02993	5440	5861	4825	4363	7136	4811	5454	5120	6943	7875	5909	6639	7156	9515	6754	6237	4985	3719	4720	6294	5518	5974	6102	4894	4565	11724	5574	8342	5272	7474
CNAG_02992	1523	1411	1154	438	670	489	2151	1438	2605	329	268	304	1532	2070	1520	472	396	510	1717	1827	1782	223	322	380	1613	3991	1927	372	450	379
CNAG_12231	242	308	247	555	930	804	205	260	387	615	548	479	379	432	392	876	686	646	297	348	271	449	635	563	173	562	236	743	498	471
CNAG_02991	26032	23987	22916	12941	23976	15867	21124	18428	31585	12619	12024	9596	27329	32672	28379	19491	12792	13856	26480	30087	25818	10178	12346	13097	20090	46808	25108	14936	13559	12889
CNAG_02990	22879	27109	20900	30750	38962	24578	27363	26310	22523	15031	10492	12651	27797	43391	24638	33738	33229	21226	24234	23053	21894	22020	24558	16990	14260	36648	16721	14585	7906	12083
CNAG_02989	8717	9314	8379	7692	13261	8320	7404	9539	9670	17215	12189	12875	11764	13546	10312	12957	8486	5847	7211	8142	8449	11868	12521	9704	7359	18055	9173	17548	12491	17730
CNAG_02988	3686	3905	3216	2701	4693	3434	3958	3332	6015	2180	2180	1893	4408	5450	4370	3796	2573	2839	3547	6495	4283	1657	2110	2560	4156	8523	4392	2652	2807	2132
CNAG_02987	68	56	80	88	101	73	42	59	72	180	120	133	93	98	72	127	69	80	46	55	49	67	90	86	25	76	41	143	103	113
CNAG_02986	67821	96968	69270	80255	182502	100119	31718	59087	51811	82481	76755	72550	111573	149504	96940	128378	98788	89002	67624	106434	76422	109827	140872	108693	39420	91902	40237	93852	69357	84623
CNAG_02985	5565	6752	4973	6822	9445	6183	7908	6526	7539	6104	4534	5345	6423	10569	6522	8177	7109	5008	5846	7372	5886	5166	6179	5662	4830	11790	5512	6153	4388	4522
CNAG_02984	410	422	329	269	414	314	1142	733	1326	502	378	380	417	585	428	378	278	293	702	897	754	247	343	413	762	2059	1000	558	549	469
CNAG_12232	453	311	339	504	663	513	259	211	263	161	102	99	456	589	496	675	594	440	256	303	239	154	274	258	196	454	197	147	146	89
CNAG_02983	10714	8626	8479	9720	14299	10077	8814	8416	8982	2572	1652	2109	9776	12859	9705	13839	11068	8356	7818	8289	7651	5254	6854	6557	5498	14279	7097	2210	3353	2172
CNAG_02982	5842	5805	5306	4936	5455	4518	6299	5315	6235	3535	3078	2892	6140	8036	5404	5774	4400	2772	5402	5450	5820	4645	4426	5978	4273	10726	5392	5043	3071	3308
CNAG_02981	16547	14653	14440	13736	22779	15303	14317	14304	18517	15379	10912	11347	18566	20949	16285	21407	14615	12106	13918	14417	15307	11533	13456	13213	13220	31529	16053	16494	13592	15700
CNAG_02980	2868	2941	2720	3319	5225	3692	2484	2484	3751	3204	2672	2692	3502	4021	3264	4844	3349	2722	2767	3314	2975	2313	2970	2878	2655	6432	3110	3669	3153	3145
CNAG_02979	2013	2186	1961	2099	2923	2137	1896	2212	2572	2312	1611	1812	2443	3341	2381	2759	2275	1609	2020	2317	2075	1537	1624	1975	1573	3756	1897	2273	2075	1882
CNAG_02978	2614	2298	2365	7859	14024	10216	1214	1924	3759	5407	7006	3837	3218	2788	3285	13136	6722	8620	2644	3051	2500	6349	7492	5843	2532	5273	3027	8745	7535	7964
CNAG_02977	16172	14545	14388	11955	20355	14099	13291	12890	19588	11919	10734	8507	18462	19293	16223	19801	12708	10945	14165	15378	16020	12653	13617	11330	12885	32724	16957	16125	11981	14296
CNAG_02976	4945	5068	4742	2464	3675	2401	5473	5318	5632	2212	1418	1549	5929	8228	5521	3541	2658	1795	4404	5219	5199	1695	2004	2072	3817	9825	4887	2148	1495	1754
CNAG_02975	7975	7347	7386	7882	12401	8633	7083	7536	9635	9669	7350	7617	10094	11736	9345	11693	8836	6690	6791	8290	8052	7251	8346	7756	6425	16885	8398	9533	8479	8947
CNAG_02974	128969	117541	110454	68535	112388	80884	102206	107717	144966	74174	57136	54310	143774	169229	134570	104473	73817	63075	109923	113120	117103	56658	64240	72461	97371	232407	121241	78869	69725	74301
CNAG_02973	2714	2646	2496	3335	4995	3891	2310	2485	3320	2652	2399	2185	3192	3577	3029	4895	3234	2848	2649	2640	2855	3062	3322	2835	2149	5356	2867	3388	2566	2982
CNAG_02972	35	20	26	51	45	29	13	11	6	31	48	7	38	36	30	37	43	18	27	22	35	33	28	27	16	26	15	26	33	35
CNAG_07506	7310	6364	6706	8619	12444	8556	6383	6474	8053	9274	7571	6928	7972	8539	7569	12337	7891	6492	6059	6232	6267	10342	9261	8576	5248	13168	6643	11518	8221	10896
CNAG_07507	2734	2448	2307	1748	2521	1876	3130	2664	2777	1765	1236	1644	2813	4048	2753	2409	1869	1274	2200	2374	2447	1301	1441	1673	2052	4832	2326	1745	1541	1576
CNAG_12233	49	57	43	217	171	190	52	27	53	599	373	544	54	80	25	184	166	112	33	62	39	257	249	227	34	98	34	511	212	458
CNAG_02969	2602	2562	2487	10650	17269	12381	1814	2538	2709	10243	8418	7750	3131	4022	3138	15924	10375	8696	1810	2170	2240	11049	12319	9383	2003	4816	2438	11291	7915	9882
CNAG_02968	3040	3048	2787	10925	18393	12906	1944	2749	3269	7933	7060	5288	3757	4243	3736	15921	11083	10310	2709	3411	2763	9148	12097	9015	2150	5124	2423	9369	7084	7961
CNAG_02967	10277	11419	9795	6438	10778	6796	7878	10880	11467	12857	9413	9885	13226	17334	12504	8905	6376	5141	8597	10705	10296	9328	9704	8129	7770	19583	9521	12196	8403	10855
CNAG_02966	2383	2531	2290	6739	11025	7134	835	1168	1145	8080	7527	5734	3153	3855	2814	10311	7467	4898	1620	1824	1941	13651	13971	8753	818	2263	955	8237	4006	7017
CNAG_02965	2213	2114	1757	4185	6637	4409	2092	2141	2679	1778	1488	1471	2773	3866	2628	5807	4163	3826	2200	2837	2311	2930	3580	2673	1678	3938	2035	1896	1366	1551
CNAG_12234	69	63	55	57	121	93	100	171	188	58	54	42	117	141	114	91	62	67	74	151	135	55	64	24	157	264	177	59	83	60
CNAG_02964	3521	3387	3386	5795	10877	8075	3600	3466	5396	5303	4194	4189	4749	5274	4713	9418	6674	5720	3606	5089	4304	3744	5149	6316	3306	8605	4167	5478	7153	4649
CNAG_02963	2063	1727	1603	1692	2640	1661	2024	1441	2142	1428	1077	1321	1663	2321	1708	2330	1810	1512	1552	1764	1594	1020	1048	1259	1215	3053	1494	1418	1375	1272
CNAG_02962	5790	5181	4727	4450	7057	4712	5524	4854	5968	4430	3372	3554	5865	7148	5640	6437	4832	3805	4522	5044	5394	4126	4254	4271	4283	10296	5110	5189	4321	4809
CNAG_02961	4924	4793	4625	2675	3828	2879	4016	3680	5868	2076	2097	1708	5238	6459	5047	3465	2411	2400	4915	5182	4937	1536	1828	2104	3892	8604	4600	2391	2426	1812
CNAG_02960	574	631	491	879	1024	886	634	557	767	641	460	486	627	827	559	993	866	576	621	636	609	776	709	931	496	1282	650	656	478	594
CNAG_02959	18235	13620	14035	3197	4443	3269	7124	5482	9025	1027	1037	723	12086	13680	13794	4111	2680	2723	7866	8300	6439	1979	2317	1860	5607	10636	6101	1544	1066	1124
CNAG_02958	28751	22091	23946	3524	4807	3432	13513	9972	14315	1239	877	880	21190	27144	23339	4590	3448	3167	11927	11714	9871	1735	2105	1961	8902	16671	9625	1276	1047	944
CNAG_07508	5074	4768	4475	3759	6061	4588	5218	6022	6426	4921	3579	3988	5962	8111	5632	5945	4156	3070	4849	5815	5229	2834	3538	4507	4338	10892	5163	4726	4840	4401
CNAG_07509	7467	7293	6646	4006	6423	4269	6348	7787	7930	3825	2844	3114	8722	10765	7751	6016	4568	3322	7256	7103	7149	3082	3914	3894	5274	13732	6531	3903	3709	3676
CNAG_07510	9953	9176	8457	11142	19743	13478	9010	8050	12546	7759	6897	6667	11408	12544	10825	17091	11253	11159	8980	11064	10264	6902	9058	9755	7816	18937	10308	8991	10377	7706
CNAG_02956	7113	7881	6733	6944	9958	6834	8923	8343	9301	5389	3783	4677	8422	12410	8180	8761	7572	5756	7070	8703	7806	4393	5398	5709	6298	15203	7110	4965	4769	3997
CNAG_02955	2378	2712	2287	2867	4372	3079	3043	2301	3295	2122	1738	2069	2993	3927	2763	3854	3018	2567	2584	2984	2676	2039	2674	2024	2085	4946	2489	2074	1782	1734
CNAG_02953	19862	19177	17696	15319	22365	16738	17291	20367	20647	24047	17378	18640	23337	28940	20767	22383	15516	11287	16002	16791	16924	20548	21985	16987	14625	35753	17703	24590	16517	23519
CNAG_02952	3080	3681	2695	1283	2224	1560	3514	2857	4465	1180	1067	1037	3580	5223	3482	1782	1365	1299	3409	5004	3273	786	1098	1161	2805	6032	2953	1337	1249	949
CNAG_02951	1614	1394	1308	1529	2118	1541	1888	1562	1926	2101	1297	1624	1612	2229	1413	2125	1643	1115	1267	1525	1518	1284	1423	1659	1282	3038	1537	1973	1603	1598
CNAG_02950	8213	8434	7547	6534	9020	6233	8296	8006	8058	8165	5772	7126	9289	13257	9096	8600	6841	4432	6184	7249	6928	5885	6018	5624	5535	13597	6439	8066	5242	6996
CNAG_02948	22923	20997	19282	10225	14079	10861	20775	17260	24768	8020	6560	5838	23435	28359	21149	14376	10092	7952	18920	20291	20724	9243	9600	9740	15768	39826	20641	9996	6751	7613
CNAG_02947	2286	2106	1985	2461	4105	2406	2216	2046	2588	2123	1611	1844	2404	2938	2170	3735	2859	2207	2029	1841	2180	1855	2250	2092	1708	4662	2251	2220	2272	2069
CNAG_12235	62	55	92	73	70	66	49	56	91	397	276	300	75	113	90	118	64	51	64	74	94	112	105	98	51	180	70	441	226	436
CNAG_07511	7793	7960	7191	4601	6826	5109	6319	5456	9591	10652	8912	7425	8859	10122	7609	6964	4199	3512	7161	7952	8111	6400	6258	5916	6531	15669	7838	14018	7615	12807
CNAG_07512	4249	4641	4194	17028	23366	16627	4054	5215	5114	25753	18528	22732	5471	7109	5185	22197	18558	13954	3156	3986	3910	19723	20341	20728	3610	8331	3988	25779	19697	23908
CNAG_02944	1626	1778	1370	3312	5929	4230	1602	1906	1728	2371	1731	1839	2156	2483	1760	5551	4047	2952	1419	1528	1709	2395	2632	3576	1236	3108	1507	2909	2398	2110
CNAG_02943	81658	78631	74830	83804	143438	86132	57808	70063	79933	296752	212830	216157	108937	117652	91671	130254	89172	65513	61165	70729	80264	224941	210829	174144	59907	160374	72304	297346	208021	295644
CNAG_02942	6327	7242	5624	2739	4254	3570	12300	9281	13709	14761	11296	11581	7830	10329	7407	4334	2612	2114	7132	9566	8509	13339	11441	11121	9308	23603	11371	15882	8532	13799
CNAG_02941	4304	4929	4178	10617	17793	10199	6602	5845	6109	18011	12178	17497	5165	8169	5039	14413	12531	8335	4194	5522	4902	11445	11914	12218	3850	10137	4624	16335	12131	14663
CNAG_02940	10999	9814	9904	7496	11950	7711	10657	12013	12580	9037	6269	7115	13295	16547	11847	11131	8196	5922	9098	10433	10108	6845	7845	7307	8850	22712	10656	9289	7775	8739
CNAG_02939	4642	4819	4363	8903	14780	9869	4148	4992	5598	12131	8249	9115	6111	7642	5684	13280	10289	7551	3631	4514	4582	8029	9133	8788	3821	10063	4555	10999	9651	10260
CNAG_02938	20229	15946	16807	12110	21655	15059	11053	12540	22968	8545	9209	6136	20555	20602	20792	19480	11221	12218	17928	18536	17659	8868	10560	10538	14658	31106	19016	11488	11562	10066
CNAG_02937	13357	12517	12157	5160	9128	6110	11518	11686	15634	4861	3741	3858	15418	17536	13875	8161	5505	4751	11865	12706	14050	5004	5526	5047	10732	27695	14176	4733	5031	4363
CNAG_12236	15	13	2	25	32	29	25	14	22	74	31	36	12	23	27	38	43	23	24	22	14	13	41	28	10	24	12	45	25	44
CNAG_02936	45111	39837	39433	22859	36433	25865	39708	39168	47796	25056	17705	19167	51902	61025	44394	35696	24653	19737	37481	40367	41848	19519	22305	23021	32827	83125	42144	25936	25316	24922
CNAG_02935	2804	2878	2607	2429	4267	3307	1582	1175	1915	689	632	458	3045	3093	2616	4148	2535	2415	1782	2026	1911	1187	1509	1992	1392	2567	1413	892	698	757
CNAG_02934	9782	8469	8791	42481	69323	44405	7678	14058	12934	46761	36126	36441	12898	16117	13720	61110	44173	34082	7196	9147	8218	40347	45870	39716	8147	20079	9768	48440	41575	45394
CNAG_02933	4329	4228	3597	6724	11741	7532	2939	3839	6782	14721	17669	10764	6214	5678	5860	10614	6511	6515	5486	5855	4940	12495	12486	8914	4066	9728	4925	21222	16789	18891
CNAG_02932	731	756	645	468	937	537	845	674	1139	640	511	496	945	1195	1003	718	517	421	828	1069	903	392	428	563	711	1631	944	667	669	478
CNAG_12237	218	254	238	188	292	250	266	371	385	292	249	204	303	400	239	252	235	178	331	399	297	185	245	209	244	433	198	249	270	225
CNAG_02931	1081	1000	1000	694	1074	669	1317	1027	1337	1003	694	740	1255	1446	1165	1023	769	627	853	1128	1045	532	609	662	972	2064	1010	871	760	796
CNAG_02930	7930	7552	7164	4479	7020	4620	9808	9145	9898	6453	4318	5909	8978	11541	7697	6595	4652	3738	6338	7253	7764	4570	4726	4547	6581	16739	8284	5910	5404	6167
CNAG_02929	7544	7142	6623	8094	13681	8445	7839	8259	8868	12319	8978	10251	8973	10340	7877	12469	8685	6999	6363	7265	7799	8513	9242	8973	6269	16173	7683	13004	10157	12138
CNAG_02928	77781	67109	69130	16066	24803	21434	42535	32857	75841	7608	8066	5015	76558	70903	71575	26220	14553	16029	64644	64121	68422	9937	12882	12617	49108	111436	61791	11261	10281	8828
CNAG_02927	7550	7281	6556	4227	7956	5014	7955	6455	10048	5069	4234	4232	8125	10720	8177	6650	4912	4234	7419	9597	7936	3249	4029	3874	6269	14878	7739	4947	4550	4621
CNAG_02926	1261	1364	1179	1748	2461	1839	1596	1285	1741	3408	2393	2701	1510	1825	1190	2284	1803	1280	1241	1429	1302	2913	2723	2708	1069	2765	1314	3345	2099	2853
CNAG_02925	6517	6501	6195	54946	89699	66180	5090	3027	7200	39296	32268	30246	7021	8576	6893	83264	55464	47005	5257	6032	5296	37783	44505	41941	4246	8810	4749	46142	44240	37103
CNAG_02924	4556	3927	3782	44297	71276	41432	4136	6149	6468	52867	43722	43093	5172	6051	5139	61558	42702	32661	3538	4070	3581	47091	47351	44006	3715	9349	4444	63322	51793	49749
CNAG_02923	3744	4188	3425	1495	2554	1915	3774	2644	5189	1219	1268	968	4101	5158	3972	2171	1553	1553	4286	5511	4156	1323	1598	1572	3374	7028	3733	1722	1322	1278
CNAG_02922	4839	4238	4176	2676	3960	2726	4615	4050	5473	3322	2441	2579	4929	6259	4781	3542	2840	2173	3702	4285	4073	2239	2432	2905	3378	8238	4182	3384	3041	2934
CNAG_02921	46935	41529	39682	41016	58955	41773	53047	51827	53972	47563	32023	41855	52820	71974	48587	57165	47863	30444	38338	42688	40830	33878	38215	38451	35674	87474	41890	44341	41649	39404
CNAG_02919	1263	1285	1142	1134	1663	1110	1365	1454	1933	770	631	488	1345	1826	1340	1496	1103	902	1266	1467	1230	748	898	787	1089	2512	1250	1019	689	710
CNAG_02920	3582	3220	3101	2492	4167	3041	3404	3652	4057	2414	1829	1779	4044	5359	4030	3830	2886	2145	2973	3418	3236	1702	2097	2325	2598	6509	3455	2356	2481	1967
CNAG_12238	548	656	533	602	839	596	715	599	920	493	407	450	746	1101	736	805	660	422	631	924	651	448	471	574	598	1400	679	524	409	359
CNAG_02918	14531	10539	11446	14286	22328	15951	10236	9592	16024	8178	6554	6574	13669	12992	11829	23144	15563	12950	11857	12129	11775	8337	9587	10684	9894	22855	12240	9050	9726	7651
CNAG_02917	1534	1456	1218	694	921	738	1172	882	1780	402	380	281	1504	1841	1385	903	584	544	1501	1510	1525	528	590	548	1143	2474	1418	626	537	410
CNAG_02916	11123	10130	9506	5357	8351	6602	10307	8538	12510	3830	3099	3258	11895	15634	11087	8369	5786	5096	10652	10810	10187	3154	3952	4720	8090	19050	10503	3980	4379	3329
CNAG_02915	8639	7652	7617	6776	10341	7241	7902	7408	9602	9401	6615	6845	9536	11552	8451	10285	7028	5858	7293	7710	8139	6914	6960	7256	6515	16765	8068	10167	7842	9075
CNAG_12239	54	43	33	44	53	30	43	28	70	46	47	45	54	30	42	56	26	51	44	45	46	21	26	18	35	69	41	53	20	48
CNAG_02914	2709	2928	2470	1915	2715	2170	3085	2561	3328	1748	1275	1265	3072	4108	2734	2634	2336	1689	2440	2813	2877	1570	1696	1745	2052	4851	2560	1704	1386	1422
CNAG_02913	3346	3321	3017	4439	6995	4634	3587	3162	3788	3450	2697	2721	3826	5022	3804	5932	5059	3499	2767	3337	3263	2872	3242	3583	2662	6077	2983	3573	3396	3125
CNAG_02912	16279	14331	14631	15377	22535	15511	13103	15892	18154	15116	11440	11925	19954	22739	17372	21734	15177	12482	13269	14522	15256	13137	14552	13800	12313	30989	15023	16591	13924	16201
CNAG_02911	2633	2376	2214	2479	3610	2523	3547	2886	2960	3535	2115	2910	2825	3867	2500	3453	2679	1813	2361	2355	2454	2116	2442	2479	2142	5320	2761	3275	2596	2936
CNAG_02910	4540	5228	4301	5140	6605	4996	12400	6499	13237	6556	5277	5365	5353	7411	5135	6360	5579	3791	5468	10073	7400	4564	5851	5614	8483	21141	9941	6481	4573	5341
CNAG_07513	13290	11649	11959	11372	19292	12528	12437	13551	15879	13794	9440	11012	14391	16673	12971	17884	12752	10295	10828	11552	13049	9113	11133	11332	10683	28658	13740	12798	12977	12453
CNAG_12240	45	38	36	7	13	17	97	62	113	56	50	24	37	35	26	19	13	10	39	36	42	13	14	28	52	90	72	62	36	55
CNAG_02907	2402	2397	2079	2041	3258	2171	2616	1876	3378	2161	1814	1732	2748	3514	2867	2923	2054	1650	2354	3063	2609	1666	1870	1759	2304	5117	2497	2212	1938	2112
CNAG_02906	5960	6959	5639	4089	6719	4628	8197	6987	9846	3816	3258	3375	7756	11371	7356	5551	4379	3657	6861	10080	7313	2486	3326	3473	6139	14444	6715	4146	3613	3595
CNAG_02905	5212	6246	5023	3658	6724	4287	5512	5068	8361	3598	3111	2957	6555	8861	6673	5036	3769	3791	6022	9284	6222	2716	3563	3621	5352	11628	5799	4012	3481	3234
CNAG_02904	1827	1830	1535	6717	11296	7193	2052	2019	2475	5779	4529	5088	1926	2995	2161	8706	7019	5507	1604	2447	1789	4158	4905	5762	1623	3648	1755	5633	5111	4792
CNAG_12241	4	6	2	8	3	3	3	3	0	10	15	41	1	1	2	5	11	4	5	2	3	13	4	1	0	6	6	24	8	5
CNAG_02903	7782	6212	6336	7147	13298	9268	4331	4349	9792	4326	5397	3355	7350	7164	7636	11563	6800	7206	7407	7818	6046	5801	6690	5385	6293	12717	7476	6974	6308	6022
CNAG_02902	968	856	859	720	1121	814	1062	881	1479	939	763	759	1155	1184	1117	1035	712	551	749	1217	1039	509	556	764	881	2198	1083	931	1148	1007
CNAG_02901	3284	3894	3009	2893	4103	2882	3770	2869	3802	2613	1972	2530	3755	5297	3560	3594	3423	2456	2964	4221	3298	1783	2024	2789	2766	6226	3016	2414	2510	2119
CNAG_12242	74	78	70	130	181	122	92	77	137	158	158	167	80	120	68	152	82	85	67	122	75	88	99	93	73	195	103	188	151	78
CNAG_02900	1724	1483	1491	1509	2321	1752	2133	3024	2809	3201	2174	2600	2091	2507	2034	2243	1436	1201	1848	2254	2106	1702	2041	2248	1967	5058	2453	2789	3052	2557
CNAG_12243	424	447	281	1048	1327	915	570	659	739	1704	1578	1800	469	666	432	1050	886	975	736	556	394	917	1160	813	341	705	302	2045	1020	1465
CNAG_02899	83	156	65	3077	5336	2888	67	68	120	8644	10088	6921	108	165	128	4007	2554	2175	214	102	91	12921	8651	2883	50	105	80	13480	2939	12022
CNAG_02898	7202	9189	6978	6349	10705	7444	11690	9743	11526	7547	5475	7039	9059	15038	8454	7922	7836	6639	8183	12287	8907	4486	5769	6850	7474	17206	7653	6878	6808	5565
CNAG_02897	7311	6796	6536	6900	11315	7479	7547	6669	8676	9162	6116	6978	8659	10583	7627	10794	8020	5834	6103	7154	7048	6436	7405	6852	6212	15539	7446	8928	7494	8328
CNAG_02896	9268	8969	8252	3619	6164	4258	11575	13066	15599	2517	2056	1972	10881	12544	9603	6134	3745	3329	9411	11489	12284	3466	3705	4384	8706	23522	11512	3289	3036	2304
CNAG_02895	9524	9571	8692	10254	17015	11743	8357	10016	12171	11727	9817	9063	11993	13718	11215	16003	11101	9035	8591	10262	10158	9774	11135	10033	8309	20775	10079	13829	11235	12497
CNAG_02894	888	946	726	799	894	637	1208	968	1202	751	497	683	900	1404	897	727	703	536	896	1034	943	514	567	650	745	1807	924	863	472	557
CNAG_02893	838	1080	837	783	1659	1007	653	599	943	935	754	792	1158	1206	1129	1236	838	724	974	1186	1030	755	864	895	640	1478	751	1149	975	919
CNAG_02892	1912	2231	1955	3291	6173	3866	1247	1875	2412	6509	5535	4738	2975	3464	2672	5531	3702	2801	1460	2151	1861	5022	5208	3798	1548	4055	2004	6986	4957	6550
CNAG_02891	10290	10153	9368	8549	14195	9986	7266	7772	11262	9204	7543	6805	11677	13092	10963	13251	9019	7683	9606	10136	10348	7844	8945	9090	7349	18896	9230	9769	8677	8705
CNAG_02890	4506	4798	3906	3320	4465	3385	4418	4312	4402	3045	2212	2429	4825	6686	4484	4703	3368	2505	4206	3778	4129	3065	3049	3244	3178	7740	3921	3190	2409	2789
CNAG_02889	151	196	139	200	219	168	670	349	359	158	67	192	133	321	178	171	189	193	208	299	194	71	100	77	160	378	208	133	104	72
CNAG_02888	869	916	878	951	1375	1002	1255	1187	1427	1069	709	713	1221	1420	1157	1186	878	750	908	1184	1112	762	850	807	819	2582	1119	1097	879	942
CNAG_07514	16816	14919	14294	7290	11825	8230	14059	13890	18314	6349	5022	4995	18982	20510	16906	11175	7330	5895	14437	15319	16327	6229	6912	7138	12840	33200	16895	7055	7753	6275
CNAG_02886	6577	6699	6079	4448	7285	5110	6826	6689	7433	4889	3495	4044	7657	10406	7236	6535	4623	3774	5563	6414	6953	3986	4377	4654	5064	12609	6163	4790	4336	4270
CNAG_02885	11010	9667	9012	5475	8341	5681	9230	8160	11522	3191	2477	2360	11441	13382	10134	7889	5556	4437	9559	10012	10385	3343	3988	4466	7427	19517	9487	3514	3715	3121
CNAG_02884	1420	1493	1339	573	930	660	1967	1687	2341	644	396	526	1644	2210	1664	859	617	620	1494	2030	1881	359	374	514	1450	3630	1987	761	707	596
CNAG_02883	17791	16544	15378	19915	30177	21258	13347	15115	17229	13856	10402	10902	21092	28940	20806	25356	19932	15785	13517	16540	14989	11900	13097	13367	11380	27973	13375	13778	13099	12809
CNAG_12244	140	222	169	939	1507	1203	158	147	183	233	226	168	194	292	207	1234	1027	874	111	144	144	443	666	603	83	239	103	243	150	182
CNAG_12245	159	148	121	225	315	207	175	135	232	272	189	231	152	300	150	236	196	155	145	171	169	130	139	160	88	210	149	217	182	162
CNAG_12246	53	53	41	129	205	159	200	124	175	213	198	190	44	94	46	139	150	112	102	119	75	102	147	129	92	144	95	172	169	121
CNAG_02882	8579	7322	7395	11969	16036	12849	9001	7350	8293	6729	4175	5297	8933	12790	8292	16890	13334	9605	6485	7224	7000	7291	9282	9365	5993	14574	7094	5353	6453	5083
CNAG_12247	0	0	0	0	0	0	0	0	0	0	0	0	0	0	0	0	0	0	0	0	0	0	0	0	0	0	0	0	0	0
CNAG_02881	2546	2905	2302	3599	6067	3840	3037	2374	3347	3862	3011	3200	3249	4373	3215	4478	3786	2822	2551	3575	2882	3237	3401	3320	2263	5088	2412	4098	3037	3621
CNAG_02880	37438	36432	35223	13824	19049	14743	25093	20097	39989	8251	8255	5489	40859	41350	37270	19569	12178	10485	32185	36226	37071	11877	12665	13095	26466	64135	33626	12391	8952	8894
CNAG_02879	3356	3512	3097	2992	4711	3322	3328	2877	4360	2592	1989	2008	3889	4972	3772	4283	3082	2643	3141	3717	3469	1956	2404	2686	2889	6737	3408	2709	2516	2079
CNAG_02878	3945	3849	3543	2449	3772	2695	3339	3238	4297	1982	1456	1615	4402	5900	4298	3593	2760	2045	3114	4062	3476	1476	1916	2341	2882	7186	3460	1838	2165	1619
CNAG_02877	11415	11093	10780	9602	16303	11848	13573	16385	17798	64842	45637	48599	15365	17340	13091	17193	10774	7117	8718	12155	12201	38166	34827	25813	13210	33211	16430	62125	42690	62263
CNAG_02876	30637	26912	26499	27813	41081	28867	22998	24240	34933	21839	20549	15984	35158	35458	32057	40452	27079	22384	27141	26544	28334	27788	28570	24906	23177	54230	28712	29321	22216	25970
CNAG_02875	2913	3097	2660	3393	4214	3125	2799	2586	3232	2536	2026	1909	3421	4316	3104	4249	3279	2220	2651	2856	2852	2943	3224	3249	2095	5167	2717	3134	2120	2356
CNAG_02874	8166	7765	6937	8298	12694	7631	6968	7205	7853	7962	6094	6728	8982	10986	8200	12698	9539	6498	7235	6553	7119	9836	10263	6429	5565	14589	6881	8203	5493	8086
CNAG_02873	2777	2683	2477	1606	2681	1859	2157	2283	3067	1792	1440	1142	3360	4040	3134	2406	1639	1474	2466	2700	2626	1706	1966	1583	2027	5180	2524	2039	1521	1574
CNAG_02871	3111	3323	2864	2162	3424	2316	3952	4021	4181	2477	1790	2434	3990	5487	3876	3053	2348	1694	3005	3446	3438	1679	2077	2048	2864	7435	3623	2525	2331	2152
CNAG_02872	0	0	0	0	0	0	0	0	0	0	0	0	0	0	0	0	0	0	0	0	0	0	0	0	0	0	0	0	0	0
CNAG_02870	2684	2617	2377	11146	16777	9661	2237	1762	3105	6071	5668	4234	2774	3245	2511	16269	9642	7525	2927	2251	2299	10002	8930	6336	1969	4447	2363	9418	4257	7371
CNAG_02869	255	292	218	2312	3510	1720	602	426	475	944	695	783	259	471	264	3152	3001	1560	345	309	325	2106	1635	1317	251	622	343	1241	465	947
CNAG_12248	584	641	469	523	551	446	452	356	515	63	90	32	592	707	613	656	416	263	873	616	560	569	573	278	353	654	349	87	27	58
CNAG_02868	8611	8329	7110	11810	14606	9920	10036	10189	8793	6714	4797	5102	9087	12989	8500	15929	12632	8297	8712	7562	7948	10323	11418	8150	5755	14710	7218	7836	3564	6101
CNAG_02867	4083	4499	3760	5509	8481	6366	4587	3467	5731	9062	7958	7038	5150	6067	4518	8365	5570	4646	4486	5141	4670	5430	5938	6178	3388	8904	4400	11200	6954	9336
CNAG_02866	7030	7410	6842	8143	12552	8727	8340	8046	9322	7140	5308	5954	8781	11407	8134	11627	9066	6986	6486	8261	7282	5963	6787	6802	6193	15048	7433	7711	6525	6395
CNAG_12249	781	990	782	569	771	581	677	825	1227	2016	1922	1437	1234	1488	1298	687	474	368	803	1217	955	832	918	898	760	1905	924	2657	1901	2319
CNAG_02865	1838	2135	1930	1784	1986	1569	1703	2137	2925	4953	4587	3997	2801	3738	2806	1786	1338	1211	1931	2867	2295	2056	2333	2360	1709	4344	2343	6184	4129	4700
CNAG_02864	10620	9967	8083	10025	9753	5729	5014	6598	8100	54954	45794	43933	13195	15973	11285	8158	8285	8477	5758	7811	6733	23244	23565	15439	6895	13837	7175	58413	39740	48360
CNAG_12250	3947	4280	3691	6269	8199	5991	4821	4835	4965	16514	12784	13165	4632	7025	4391	7405	6404	4323	3799	4143	4189	5189	6090	6173	3469	8013	4069	16072	12194	13728
CNAG_02863	0	0	0	0	0	0	0	0	0	0	0	0	0	0	0	0	0	0	0	0	0	0	0	0	0	0	0	0	0	0
CNAG_12251	6	12	14	26	54	13	41	20	26	21	23	32	18	32	11	32	23	29	17	19	14	26	29	21	9	41	13	38	20	28
CNAG_12252	36	69	33	8	16	24	61	53	82	224	153	170	59	134	47	25	18	14	48	93	69	47	43	57	77	173	49	199	133	178
CNAG_02862	2396	2428	2277	3159	5141	3137	3431	3471	3169	8097	5206	6955	3096	4559	3101	4413	3792	2353	1805	2590	2282	4406	4186	3538	2186	5512	2596	7302	5633	6027
CNAG_02861	1629	1551	1387	1333	2316	1514	1606	1658	2041	1664	1297	1488	1736	2185	1855	2112	1488	1268	1712	1872	1826	1202	1363	1481	1494	3428	1684	1615	1625	1472
CNAG_02860	72247	64072	62995	54931	95209	66982	70276	81197	89566	128275	91823	103155	91882	106387	82340	93899	66090	51005	65915	66881	75385	59405	70188	73553	63013	169259	80069	121107	107373	117838
CNAG_02859	2314	2360	2165	1445	2559	1611	2538	2454	2904	3300	2451	2501	2719	3644	2487	2349	1681	1328	2012	2551	2371	1925	2096	2001	1830	4698	2451	3356	2430	3142
CNAG_12253	899	686	596	87	66	48	716	272	465	24	24	3	693	968	787	102	66	91	448	547	406	22	26	20	300	546	299	27	12	20
CNAG_02858	50902	43827	45077	11947	20448	15657	26394	22887	54647	8010	8649	4638	53597	46784	49502	19786	10470	12082	45068	47168	47582	9336	10834	9850	34620	78463	44429	12207	10751	10448
CNAG_02857	21599	18341	17444	5758	8925	6796	21796	18697	21252	11060	7636	9368	21714	28182	19813	8946	5841	4589	17968	16937	17933	6867	6813	5685	14715	36501	18248	11318	7410	11012
CNAG_02856	21484	18641	18924	10546	17173	11122	18615	17227	19759	13719	10055	10581	25195	31649	23546	15759	11641	8939	15770	19307	18891	10364	10807	10716	13684	33375	16561	13954	11331	12616
CNAG_12254	62	56	46	80	88	76	72	66	61	39	42	62	41	61	49	76	61	67	83	90	30	30	32	50	45	111	49	81	57	68
CNAG_02855	10804	10330	9632	5411	9030	6110	10540	9893	11635	4691	3431	3826	12707	15787	11823	8149	6290	4134	9089	10296	10875	4511	4725	5027	7903	19781	10217	4566	4955	4082
CNAG_12255	0	0	0	0	0	0	0	0	0	0	0	0	0	0	0	0	0	0	0	0	0	0	0	0	0	0	0	0	0	0
CNAG_12256	3373	4902	2950	6555	10894	7973	4648	3540	6195	2727	3940	2156	3943	5371	4092	8822	6463	6535	7141	5792	4069	4433	6285	4025	3476	6649	3365	5063	3363	3608
CNAG_07515	480	730	409	1011	1658	1237	924	547	706	157	143	151	534	892	447	1459	1156	1010	901	737	548	554	1044	455	393	802	312	175	98	136
CNAG_02854	4980	5841	4317	4877	7845	5602	6532	4825	7594	3661	2812	3118	6130	8254	6087	6495	4954	4778	5440	7912	5890	2281	3369	3896	4629	11241	5312	3723	3801	3180
CNAG_02853	13555	13164	12261	11285	14927	11985	9578	8479	14285	7132	7021	5016	15200	16732	14533	15960	10039	8342	12150	12383	12068	10315	10165	10274	9055	21188	11173	11554	7040	8887
CNAG_02852	8758	8415	7952	15078	24691	16070	5926	7297	9006	13001	10816	9393	10062	11342	9184	23122	15431	12159	8080	7087	7373	12756	14580	13115	5857	14430	7014	16198	11534	15030
CNAG_02851	4440	4960	4150	19092	38279	20058	4565	4912	7340	12460	11649	10675	6005	7287	6046	27952	20577	17353	5095	6721	4998	13766	16469	13933	4641	9828	5020	15421	12616	13485
CNAG_02850	22259	15896	15355	23576	15824	15631	27868	19007	28279	20776	16139	17541	14419	19304	13805	21162	20340	19765	17800	16013	15637	11579	16220	11511	17472	35355	20357	21956	17290	15445
CNAG_02849	9	14	6	83	68	104	4	2	5	10	16	26	14	16	10	141	109	60	15	8	8	14	30	33	1	6	6	12	5	27
[truncated: 6,326 more rows]

## Sheet: PP-domain specific genes
Category	Locus_tag	Gene name	Function
MM_up_PP_only	CNAG_03202	CAC1	Adenylate cyclase
MM_up_PP_only	CNAG_03474	-	efflux protein EncT
MM_up_PP_only	CNAG_12747	-	unspecified product
MM_up_PP_only	CNAG_07516	-	hypothetical protein
MM_up_PP_only	CNAG_05994	-	multidrug transporter
MM_up_PP_only	CNAG_12432	-	unspecified product
MM_up_PP_only	CNAG_13031	-	unspecified product
MM_up_PP_only	CNAG_05458	-	endo-1,3(4)-beta-glucanase
MM_up_PP_only	CNAG_10052	-	unspecified product
MM_up_PP_only	CNAG_06133	-	hypothetical protein
MM_up_PP_only	CNAG_06541	-	hypothetical protein, variant
MM_up_PP_only	CNAG_12163	-	unspecified product
MM_up_PP_only	CNAG_02815	-	glycerol-3-phosphate dehydrogenase
MM_up_PP_only	CNAG_12651	-	unspecified product
MM_up_PP_only	CNAG_06863	-	hypothetical protein
MM_up_PP_only	CNAG_00654	SRX1	sulfiredoxin
MM_up_PP_only	CNAG_04920	-	galactose transporter, variant
MM_up_PP_only	CNAG_03595	-	hypothetical protein
MM_up_PP_only	CNAG_05864	-	hypothetical protein
MM_down_PP_only	CNAG_12035	-	unspecified product
MM_down_PP_only	CNAG_03085	-	hypothetical protein
MM_down_PP_only	CNAG_04861	-	transglycosylase SLT domain-containing protein
MM_down_PP_only	CNAG_05655	CML1	EF-hand calcium-binding protein
MM_down_PP_only	CNAG_12301	-	unspecified product
MM_down_PP_only	CNAG_12380	-	unspecified product
MM_down_PP_only	CNAG_00677	UHF1	E3 ubiquitin-protein ligase UHRF1
MM_down_PP_only	CNAG_12030	-	unspecified product
MMG_up_PP_only	CNAG_03754	ISP1	short-chain dehydrogenase/reductase SDR
MMG_up_PP_only	CNAG_12636	-	unspecified product
MMG_up_PP_only	CNAG_07516	-	hypothetical protein
MMG_up_PP_only	CNAG_12351	-	unspecified product
MMG_up_PP_only	CNAG_12219	-	unspecified product
MMG_up_PP_only	CNAG_12266	-	unspecified product
MMG_up_PP_only	CNAG_12216	-	unspecified product

## Sheet: 01_WT_g_vs_WT_m_all
	WT_g_1	WT_g_2	WT_g_3	WT_m_1	WT_m_2	WT_m_3	padj	log2FoldChange	pvalue	stat	foldChange	log10padj
CNAG_04548	95	80	66	1504	2782	1746	3.94777e-194	4.42294	7.13158e-196	891.438	21.4505	193.404
CNAG_07303	176	146	107	1309	2193	1297	9.60579e-102	3.26891	4.95622e-103	464.534	9.63918	101.017
CNAG_07304	1862	2065	1791	5006	6582	4845	5.56691e-47	1.33265	6.75028e-48	211.414	2.51865	46.2544
CNAG_00001	802	782	711	1655	1938	1446	4.57211e-15	0.954215	1.45445e-15	63.6924	1.93753	14.3399
CNAG_07305	515	600	427	1060	1614	1139	4.02211e-20	1.10596	1.0431e-20	87.0783	2.15242	19.3955
CNAG_00002	2223	2850	2048	1928	3059	2077	0.0587863	-0.217614	0.04581	3.98857	0.859987	1.23072
CNAG_00003	1540	1194	1244	2763	4862	3430	3.97711e-29	1.25979	7.48476e-30	128.804	2.39461	28.4004
CNAG_00004	5284	5150	4568	7832	13641	8843	1.1852e-23	0.797068	2.68511e-24	103.439	1.73757	22.9262
CNAG_00005	138	140	111	2095	3856	2357	1.71341e-220	4.19244	2.39564e-222	1013.23	18.2831	219.766
CNAG_12001	513	468	425	1444	2212	1652	1.35542e-61	1.71596	1.21924e-62	279.034	3.28515	60.8679
CNAG_00006	11893	12791	11359	10774	18112	12410	0.838607	-0.017349	0.813497	0.0556571	0.988047	0.0764415
CNAG_00007	9277	9216	7954	6007	9102	6127	4.79277e-13	-0.520882	1.67468e-13	54.3536	0.696946	12.3194
CNAG_00008	7587	7107	6934	7369	11401	7697	0.275491	0.0829216	0.236904	1.39892	1.05916	0.559893
CNAG_00009	2891	2201	2348	2117	3078	2238	0.0740466	-0.200447	0.0583522	3.58361	0.870281	1.1305
CNAG_00010	8734	8704	8176	8453	12086	8942	0.946722	0.0053468	0.938405	0.00597141	1.00371	0.0237776
CNAG_00011	16368	18081	15598	10470	17152	10233	5.22225e-13	-0.621107	1.83186e-13	54.1774	0.650172	12.2821
CNAG_00012	6041	5625	5756	7763	13755	9794	4.03606e-12	0.628399	1.48019e-12	50.0745	1.54585	11.394
CNAG_00013	2663	2734	2429	1967	3425	2123	0.0019664	-0.278742	0.00129804	10.3453	0.824309	2.70633
CNAG_00014	2076	2109	2095	3174	5353	3423	7.2409e-16	0.70876	2.22907e-16	67.3888	1.6344	15.1402
CNAG_00015	1388	1437	1262	7962	11792	7418	5.25437e-177	2.52621	1.17674e-178	812.241	5.76057	176.279
CNAG_00016	6536	8309	6341	5004	8382	5402	0.000175745	-0.387897	0.000105878	15.0289	0.764243	3.75512
CNAG_00017	1128	1253	1103	1110	1578	1333	0.898453	0.0156954	0.882384	0.0218886	1.01094	0.0465048
CNAG_12002	70	102	47	134	153	88	0.0689714	0.597062	0.0541906	3.70682	1.51263	1.16133
CNAG_00018	5416	4530	4729	4961	8268	5750	0.0938169	0.158232	0.0749769	3.17056	1.11592	1.02772
CNAG_00019	7821	9362	7979	5747	8722	5865	5.72506e-09	-0.51414	2.48355e-09	35.5518	0.70021	8.24222
CNAG_00020	4776	4534	4382	2964	4920	3100	4.28557e-11	-0.535028	1.65972e-11	45.336	0.690145	10.368
CNAG_12003	63	95	57	185	248	166	2.9882e-07	1.28548	1.45787e-07	27.6445	2.43763	6.52459
CNAG_00021	1914	2125	1849	1397	1641	1318	9.01824e-08	-0.613524	4.25024e-08	30.0318	0.653598	7.04488
CNAG_12004	9	7	5	19	11	15	0.216395	0.986064	0.182551	1.77674	1.98077	0.664752
CNAG_00022	4202	4581	3685	3228	4569	3163	1.27999e-05	-0.382976	6.99069e-06	20.1958	0.766854	4.89279
CNAG_00023	1669	1723	1507	985	1534	1142	7.95173e-12	-0.622789	2.9605e-12	48.7146	0.649414	11.0995
CNAG_00024	35360	32524	29641	27001	34358	25036	7.02388e-05	-0.361116	4.08118e-05	16.8333	0.778562	4.15342
CNAG_00025	10701	9234	9296	16200	23673	16863	2.544e-21	0.756051	6.30177e-22	92.6308	1.68886	20.5945
CNAG_00026	12811	12975	12198	5676	8690	6270	2.56705e-57	-1.08462	2.54101e-58	259.218	0.471515	56.5906
CNAG_00027	3553	3315	3141	3580	6368	4127	0.00205554	0.27144	0.00135968	10.2597	1.20701	2.68707
CNAG_00028	2278	2487	2220	4914	9051	6113	8.86903e-43	1.30164	1.16761e-43	191.993	2.46509	42.0521
CNAG_00029	466	522	394	282	492	401	0.00562245	-0.436834	0.00390274	8.32852	0.738754	2.25007
CNAG_00030	381	381	317	566	1033	639	3.54726e-10	0.831233	1.44357e-10	41.1038	1.7792	9.45011
CNAG_00031	2558	2308	2144	4208	8046	5085	5.87257e-27	1.07999	1.17931e-27	118.765	2.11402	26.2312
CNAG_00032	373	398	320	1189	2291	1555	2.0719e-54	1.98501	2.16111e-55	245.779	3.95867	53.6836
CNAG_00033	52	43	23	208	281	194	1.43179e-17	2.34649	4.1207e-18	75.2627	5.08587	16.8441
CNAG_07306	54	59	68	312	426	370	3.02527e-30	2.42226	5.55119e-31	133.968	5.36011	29.5192
CNAG_00034	69102	67333	64089	11397	18379	14564	1.32205e-168	-2.38023	3.1898e-170	773.454	0.192079	167.879
CNAG_00035	2051	1727	1677	2997	4814	3155	1.00531e-17	0.796393	2.86964e-18	75.9772	1.73675	16.9977
CNAG_00036	3070	3363	2998	7702	13696	8926	1.71743e-63	1.46392	1.50025e-64	287.799	2.75857	62.7651
CNAG_07307	76	105	89	141	190	160	0.00545258	0.672561	0.00377875	8.38719	1.5939	2.2634
CNAG_00038	5265	6197	4670	3468	5234	3724	7.10722e-10	-0.576504	2.94156e-10	39.713	0.670587	9.1483
CNAG_12005	92	109	100	859	1142	711	3.44571e-71	2.97117	2.72007e-72	323.335	7.84173	70.4627
CNAG_00039	5683	4970	5251	9582	10477	8180	7.99738e-08	0.654176	3.75329e-08	30.2729	1.57372	7.09705
CNAG_00040	13334	11366	10798	6447	9796	7111	2.7776e-22	-0.805145	6.60547e-23	97.0957	0.572304	21.5563
CNAG_07308	298	365	321	840	1484	912	1.23709e-29	1.49409	2.30519e-30	131.142	2.81686	28.9076
CNAG_12006	66	106	84	686	1328	760	2.31653e-65	3.2032	1.96913e-66	296.436	9.20999	64.6352
CNAG_00043	3986	4095	3470	5061	8576	6232	1.13057e-11	0.573479	4.25398e-12	48.0038	1.48811	10.9467
CNAG_00044	9702	8819	8536	5835	10385	6758	7.95482e-08	-0.4564	3.73233e-08	30.2838	0.728803	7.09937
CNAG_00045	2339	2257	2171	4110	7142	4622	2.20392e-33	1.01048	3.71683e-34	148.485	2.01458	32.6568
CNAG_00046	11831	13255	11259	5001	8638	5737	1.30439e-41	-1.12407	1.76081e-42	186.594	0.458798	40.8846
CNAG_00047	5443	4748	4502	22582	31674	24216	2.37701e-151	2.22463	6.79398e-153	693.762	4.6739	150.624
CNAG_00048	376	453	324	753	1240	847	7.65148e-17	1.09246	2.2731e-17	71.8919	2.13238	16.1163
CNAG_12007	103	76	96	531	817	697	3.36953e-50	2.69647	3.84398e-51	226.289	6.48214	49.4724
CNAG_00049	777	692	706	595	1240	765	0.88065	0.0228352	0.862126	0.0301609	1.01595	0.0551968
CNAG_12008	23	48	23	8	34	12	0.0682377	-1.08822	0.0535635	3.72625	0.47034	1.16598
CNAG_00050	1493	1464	1369	815	1104	712	1.65096e-17	-0.917167	4.76986e-18	74.9739	0.529548	16.7823
CNAG_00051	11684	9914	9771	10127	15007	10037	0.675923	-0.0390097	0.637703	0.221759	0.973323	0.170102
CNAG_00052	692	1058	730	1469	2662	1736	4.62545e-12	1.02274	1.70321e-12	49.7991	2.03177	11.3348
CNAG_00053	1040	625	641	1462	1461	1348	0.000117325	0.73521	6.94052e-05	15.827	1.66464	3.93061
CNAG_00054	2736	3402	2985	3982	6463	4353	1.10766e-06	0.48446	5.60819e-07	25.0424	1.39906	5.95559
CNAG_00055	5887	4941	4916	6986	11228	8323	9.86948e-10	0.547831	4.11656e-10	39.0568	1.46189	9.00571
CNAG_00056	4356	3929	3924	2810	4897	3022	6.73521e-06	-0.408651	3.59761e-06	21.4681	0.753327	5.17165
CNAG_00057	22516	22356	20983	34678	53735	43285	8.02662e-23	0.800736	1.8552e-23	99.6105	1.74199	22.0955
CNAG_00058	15573	13807	13175	6116	10485	7384	2.74874e-35	-1.03988	4.37037e-36	157.314	0.486369	34.5609
CNAG_00059	915	1084	783	1450	2263	1429	4.36545e-09	0.678615	1.88187e-09	36.0923	1.6006	8.35997
CNAG_00060	2980	3400	2930	3461	4407	3330	0.454467	0.0794152	0.410382	0.677695	1.05659	0.342497
CNAG_00061	68663	58821	57306	98060	171135	127509	2.21713e-21	0.891097	5.45916e-22	92.9149	1.85459	20.6542
CNAG_00062	10631	10393	9508	5237	8739	5821	1.16666e-31	-0.838811	2.06424e-32	140.505	0.559104	30.9331
CNAG_00063	1477	974	894	1364	1466	1155	0.64293	0.0878771	0.602364	0.271445	1.06281	0.191836
CNAG_00064	7463	8291	6749	2584	5168	3393	1.20532e-30	-1.24054	2.19529e-31	135.81	0.423214	29.9189
CNAG_00065	22518	20715	20275	8270	13420	9777	1.50194e-58	-1.22113	1.4421e-59	264.934	0.428947	57.8233
CNAG_00066	16838	15128	15248	19415	30502	21119	2.76687e-07	0.380664	1.34851e-07	27.7953	1.30194	6.55801
CNAG_00067	9107	10794	8770	7228	12545	9009	0.0338824	-0.206783	0.0256528	4.97927	0.866467	1.47003
CNAG_12009	202	223	205	373	641	542	3.64284e-11	1.09997	1.40764e-11	45.6586	2.1435	10.4386
CNAG_12010	11	4	6	96	200	119	5.1384e-23	4.07113	1.18192e-23	100.503	16.8086	22.2892
CNAG_12011	10	43	16	46	36	58	0.123782	0.901051	0.100671	2.69489	1.86743	0.907342
CNAG_00068	3126	3011	2954	7118	7825	5928	9.60477e-18	1.02375	2.7393e-18	76.069	2.03319	17.0175
CNAG_12013	23	54	31	99	74	102	0.00348061	1.22129	0.00235917	9.24673	2.33156	2.45834
CNAG_00070	6836	6466	6325	7868	10716	7508	0.0106205	0.214322	0.00757704	7.13081	1.16016	1.97386
CNAG_00072	13293	12018	11742	7740	14295	9515	5.64114e-07	-0.454514	2.80522e-07	26.3794	0.729756	6.24863
CNAG_00073	16018	15980	15068	10766	17368	11737	2.33675e-11	-0.451036	8.92254e-12	46.5519	0.731517	10.6314
CNAG_00074	18725	15937	15858	10162	17664	11828	1.12004e-10	-0.566545	4.44024e-11	43.4095	0.675232	9.95077
CNAG_00075	5373	6688	5007	2757	5299	3111	4.36845e-13	-0.841612	1.52425e-13	54.5386	0.55802	12.3597
CNAG_00076	2775	2661	2235	1245	1871	1485	2.25536e-22	-0.932196	5.32167e-23	97.5237	0.52406	21.6468
CNAG_07947	848	1049	763	515	709	413	8.78893e-10	-0.901812	3.66042e-10	39.2861	0.535214	9.05606
CNAG_00077	32909	31513	30918	6557	6261	6026	6.53722e-70	-2.49347	5.24951e-71	317.433	0.177578	69.1846
CNAG_00078	7242	6312	6204	5245	9800	6836	0.496903	-0.0730162	0.453004	0.563124	0.950648	0.303728
CNAG_12014	30	51	25	221	451	320	6.32491e-29	3.00742	1.19737e-29	127.872	8.04124	28.1989
CNAG_00079	3031	2467	2300	13922	21137	14500	2.75931e-146	2.46529	8.26221e-148	670.379	5.52238	145.559
CNAG_00080	240	283	214	225	219	248	0.286095	-0.242947	0.247014	1.34011	0.845018	0.54349
CNAG_00081	9067	8092	7869	7765	12675	8417	0.934395	-0.00728113	0.923296	0.00927043	0.994966	0.0294696
CNAG_00082	4740	4690	4453	3086	4984	3311	2.39824e-11	-0.499102	9.16327e-12	46.4997	0.707547	10.6201
CNAG_00083	6181	5936	5866	4545	7117	5090	3.40352e-05	-0.309446	1.92917e-05	18.258	0.806952	4.46807
CNAG_00084	6644	6076	6097	6012	8551	6212	0.511221	-0.0557424	0.467575	0.5277	0.962099	0.291391
CNAG_00085	1092	789	755	722	861	689	0.0113114	-0.390821	0.00808675	7.01416	0.762695	1.94648
CNAG_00086	2370	2352	2068	1567	1950	1729	3.93981e-07	-0.549667	1.93822e-07	27.0938	0.683178	6.40452
CNAG_00087	7669	7250	6936	4573	7456	4896	2.95099e-15	-0.58222	9.31084e-16	64.5712	0.667935	14.53
CNAG_00088	14065	14886	12839	15495	30341	19526	1.90704e-05	0.417306	1.05776e-05	19.4042	1.33543	4.71964
CNAG_00089	3699	3715	3364	3071	4213	3387	0.01901	-0.204166	0.0139553	6.04379	0.86804	1.72102
CNAG_00090	3325	2823	2923	3876	5880	4010	8.55995e-06	0.395368	4.60619e-06	20.9944	1.31528	5.06753
CNAG_00091	72968	82032	74305	32829	64619	40139	5.33538e-22	-0.969814	1.28202e-22	95.7828	0.510572	21.2728
CNAG_00092	10503	10344	9835	9704	17653	11721	0.150237	0.126839	0.123822	2.3683	1.0919	0.823224
CNAG_00093	22563	22799	21265	12561	23201	14263	9.86079e-14	-0.640999	3.32475e-14	57.5323	0.641269	13.0061
CNAG_00094	1101	937	850	17286	26935	21379	0	4.30822	0	1644.62	19.8108
CNAG_00096	1414	1511	1361	3417	5789	3765	5.44954e-58	1.38065	5.29311e-59	262.343	2.60386	57.2636
CNAG_00097	2193	1871	2007	2894	4904	3094	1.9503e-10	0.623195	7.84029e-11	42.2972	1.54028	9.7099
CNAG_12015	86	124	59	95	150	99	0.621286	0.155135	0.579544	0.306973	1.11353	0.206709
CNAG_00098	3098	3164	2828	2846	6170	3717	0.0421737	0.246706	0.0322904	4.58301	1.1865	1.37496
CNAG_00099	4246	3662	3485	1763	1924	1665	3.37796e-24	-1.2581	7.46478e-25	105.976	0.418095	23.4713
CNAG_00100	21012	18652	17808	16323	28369	20124	0.669942	-0.040003	0.631314	0.230283	0.972653	0.173963
CNAG_00101	3203	3359	2729	1807	2830	2090	1.39872e-14	-0.667342	4.55683e-15	61.4433	0.629665	13.8543
CNAG_07309	5406	5955	5405	4464	8548	5747	0.559576	-0.0634092	0.516511	0.420855	0.957	0.252141
CNAG_07310	4094	4938	4004	4482	7747	5176	0.0411653	0.200904	0.0314827	4.62645	1.14942	1.38547
CNAG_00104	23732	21717	21232	15694	17818	14655	2.03244e-09	-0.642827	8.60554e-10	37.6178	0.640457	8.69198
CNAG_00105	1029	940	1078	829	1290	1033	0.225789	-0.155456	0.191203	1.70833	0.897849	0.646297
CNAG_00106	12479	11512	10792	8261	10509	7890	1.7709e-10	-0.569768	7.09938e-11	42.4914	0.673725	9.75181
CNAG_00107	8080	8248	7192	8070	13186	8487	0.100488	0.125354	0.0806064	3.05263	1.09078	0.997888
CNAG_00108	6823	6744	6144	4661	7222	4848	1.94466e-10	-0.444084	7.81521e-11	42.3035	0.735051	9.71116
CNAG_00109	4617	4918	4248	6259	8855	5710	7.13564e-06	0.39368	3.81945e-06	21.3534	1.31374	5.14657
CNAG_00110	2362	1160	1347	1041	783	888	0.0287219	-0.967452	0.0215965	5.278	0.511408	1.54179
CNAG_00111	8699	8472	7741	8095	13254	8700	0.450863	0.0574143	0.406848	0.687992	1.0406	0.345955
CNAG_07311	1085	1120	831	1261	1635	1133	0.080508	0.220723	0.0637729	3.43644	1.16532	1.09416
CNAG_07312	3572	3740	3389	4881	8002	5046	2.93717e-11	0.528613	1.12879e-11	46.0911	1.44254	10.5321
CNAG_00115	36040	25303	26688	16086	24832	17199	1.78949e-12	-0.803426	6.44988e-13	51.705	0.572987	11.7473
CNAG_12016	690	628	549	536	976	709	0.792143	0.0379227	0.762347	0.091446	1.02663	0.101196
CNAG_00116	55146	49953	49052	13832	21729	16361	5.40955e-116	-1.77359	2.34936e-117	530.368	0.292479	115.267
CNAG_00117	6728	5988	5546	4994	8371	5513	0.0517418	-0.165837	0.0400388	4.21624	0.891411	1.28616
CNAG_00118	1876	1616	1509	831	1314	910	5.3227e-20	-0.917107	1.38632e-20	86.5157	0.52957	19.2739
CNAG_00119	873	995	966	511	644	478	2.76053e-14	-0.987478	9.06857e-15	60.0885	0.504359	13.559
CNAG_00120	1969	2171	1999	3599	5456	3602	1.96082e-22	0.83537	4.60727e-23	97.8091	1.78431	21.7076
CNAG_00121	32854	30489	30639	24575	44902	30134	0.128208	-0.138792	0.104587	2.63417	0.908279	0.892087
CNAG_12017	44	28	59	213	319	250	1.04795e-17	2.36846	2.99397e-18	75.8934	5.16389	16.9797
CNAG_00122	3459	1408	1806	4991	5018	4845	0.0246894	1.00447	0.0183811	5.55945	2.00621	1.60749
CNAG_00123	2013	2471	2303	3767	5754	4007	8.38363e-15	0.786717	2.7043e-15	62.4708	1.72514	14.0766
CNAG_00124	2181	1932	2009	2220	3235	2198	0.224077	0.117833	0.189586	1.72083	1.0851	0.649603
CNAG_00125	907	874	926	1200	2091	1405	9.17549e-08	0.575029	4.33003e-08	29.9957	1.48971	7.03737
CNAG_00126	5284	4076	3998	5622	8453	5985	0.000174332	0.385845	0.000104983	15.0449	1.30662	3.75862
CNAG_07313	564	732	548	1300	1983	1471	4.42721e-22	1.1662	1.06051e-22	96.1584	2.2442	21.3539
CNAG_00127	2074	2127	1864	2526	4679	2953	5.34708e-08	0.519985	2.47638e-08	31.0798	1.43394	7.27188
CNAG_12018	951	1004	858	1198	2155	1618	7.06725e-08	0.609587	3.3019e-08	30.5215	1.52582	7.15075
CNAG_00128	239	270	217	42	20	29	4.28602e-22	-3.12441	1.02563e-22	96.2246	0.114673	21.3679
CNAG_12019	377	408	368	1319	1981	1672	3.62945e-57	1.91359	3.60161e-58	258.523	3.76746	56.4402
CNAG_00129	2493	2481	2351	3134	4864	3199	3.41369e-07	0.402375	1.67221e-07	27.3792	1.32168	6.46678
CNAG_12020	30	52	59	26	42	25	0.0595428	-0.827006	0.0464215	3.96623	0.563698	1.22517
CNAG_00130	40308	43082	39265	38795	61736	41572	0.985556	0.00139438	0.983483	0.000428576	1.00097	0.00631853
CNAG_00131	681	896	791	3344	5858	4101	7.58872e-80	2.27213	5.32393e-81	363.322	4.83036	79.1198
CNAG_00132	1486	1306	1346	1651	2917	1931	2.14822e-05	0.431555	1.19665e-05	19.1686	1.34869	4.66792
CNAG_00133	1639	1711	1524	500	892	566	6.15132e-50	-1.53484	7.04791e-51	225.081	0.345119	49.211
CNAG_00134	2539	2567	2696	2785	4512	3091	0.0342593	0.198655	0.0259551	4.959	1.14763	1.46522
CNAG_00135	1685	2027	1551	1155	2156	1456	0.00219526	-0.361861	0.00145617	10.1333	0.77816	2.65851
CNAG_00136	32576	28714	29427	21311	39048	26683	0.00277755	-0.281287	0.00186236	9.68048	0.822857	2.55634
CNAG_00137	11324	12090	11005	4777	5745	4662	3.03872e-43	-1.36037	3.95913e-44	194.145	0.389481	42.5173
CNAG_00138	6879	6154	6118	5119	8747	6688	0.281397	-0.107209	0.242575	1.36557	0.928382	0.550681
CNAG_00139	31861	37701	34971	41477	79989	50658	4.05442e-06	0.48784	2.13055e-06	22.4736	1.40234	5.39207
CNAG_00140	9685	9998	8880	8751	11870	8862	0.0669886	-0.146045	0.0524918	3.76002	0.903725	1.174
CNAG_00141	5752	6187	5389	11935	18435	12605	4.22635e-55	1.1039	4.35604e-56	248.97	2.14934	54.374
CNAG_12022	141	169	113	174	303	167	0.0780911	0.386508	0.0617134	3.49073	1.30723	1.1074
CNAG_00142	2292	2287	2168	2128	2260	1986	0.0547647	-0.249232	0.0424728	4.11626	0.841344	1.2615
CNAG_12023	39	20	33	150	214	183	1.69056e-15	2.37811	5.29424e-16	65.6837	5.19856	14.772
CNAG_12024	1405	1537	1361	634	895	644	8.82235e-32	-1.18437	1.55772e-32	141.064	0.440017	31.0544
CNAG_00143	8971	8401	8163	3394	5503	3802	4.17715e-61	-1.21839	3.78848e-62	276.775	0.429763	60.3791
CNAG_00144	1383	1226	1092	1376	2665	1586	0.00144644	0.375724	0.000941742	10.9387	1.29749	2.8397
CNAG_00145	3724	3990	3458	1117	1851	1277	1.50371e-80	-1.60665	1.04192e-81	366.575	0.32836	79.8228
CNAG_00146	6426	6203	5790	6407	9290	6624	0.303162	0.0774244	0.263288	1.25139	1.05513	0.518325
CNAG_00147	82888	70201	74431	59675	99038	73064	0.0473221	-0.183395	0.0364665	4.37516	0.880628	1.32494
CNAG_00148	28132	25244	25300	16669	30064	19580	6.13614e-08	-0.46936	2.857e-08	30.8023	0.722285	7.2121
CNAG_00149	6372	5777	5491	6511	9672	6754	0.0215356	0.17659	0.0159079	5.81303	1.13021	1.66684
CNAG_00150	25766	22821	22364	14099	16939	14053	9.94786e-17	-0.83141	2.96516e-17	71.3675	0.56198	16.0023
CNAG_00151	6062	6006	5258	3982	6642	4314	2.6232e-08	-0.427903	1.18924e-08	32.5044	0.743342	7.58117
CNAG_00152	2839	2989	2522	2637	3652	2556	0.217741	-0.112622	0.183741	1.7671	0.924905	0.662059
CNAG_00153	1594	1595	1588	998	1608	1156	5.0167e-09	-0.554095	2.16819e-09	35.8164	0.681084	8.29958
CNAG_00154	6539	6211	5990	2437	4670	2910	3.51057e-32	-1.13251	6.12894e-33	142.917	0.456121	31.4546
CNAG_12025	176	235	226	313	519	372	6.72832e-05	0.704601	3.90362e-05	16.9177	1.62969	4.17209
CNAG_00156	12863	11224	11224	17296	25294	18009	1.19352e-13	0.578387	4.04337e-14	57.1474	1.49318	12.9232
CNAG_00157	5056	5105	4639	6467	11929	7871	5.68565e-12	0.605141	2.10204e-12	49.3863	1.52113	11.2452
CNAG_00158	785	783	662	634	1114	702	0.506329	-0.0817839	0.462349	0.540201	0.944889	0.295567
CNAG_00159	1220	1145	1155	1190	1971	1276	0.250216	0.118009	0.213467	1.54776	1.08524	0.601685
CNAG_00160	793	842	773	1435	2148	1539	4.32473e-21	0.885873	1.07984e-21	91.565	1.84788	20.364
CNAG_00161	1974	2147	1658	3750	8001	4947	6.6359e-26	1.29684	1.37201e-26	113.898	2.45691	25.1781
CNAG_00162	153532	147197	137761	214338	395998	239915	2.22958e-17	0.727452	6.47192e-18	74.3714	1.65571	16.6518
CNAG_00163	6390	5909	5649	8555	15355	11106	2.17517e-16	0.748765	6.54811e-17	69.8046	1.68035	15.6625
CNAG_12026	169	133	135	81	125	72	0.000302382	-0.864694	0.000185463	13.9729	0.549163	3.51944
CNAG_00164	2600	3015	2485	36755	64212	45869	0	3.96673	0	1570.78	15.6353
CNAG_00165	8293	7859	7147	4394	4867	4059	3.62766e-18	-0.976706	1.01262e-18	78.0344	0.508139	17.4404
CNAG_12027	17	48	16	37	41	34	0.585936	0.303917	0.543307	0.369446	1.23449	0.23215
CNAG_12028	50	25	39	64	114	70	0.0130604	0.897618	0.00940184	6.74486	1.86299	1.88404
CNAG_00166	1606	1644	1402	2819	2927	2557	3.29467e-07	0.673176	1.61238e-07	27.4497	1.59458	6.48219
CNAG_00167	3473	3471	3468	4921	7992	5404	3.31022e-14	0.601243	1.09153e-14	59.7237	1.51702	13.4801
CNAG_07314	9303	7275	7542	12516	18900	14223	1.21234e-13	0.720269	4.10865e-14	57.1159	1.64749	12.9164
CNAG_07315	5021	4919	4786	4310	7386	5193	0.854656	-0.0170074	0.83192	0.0450455	0.988281	0.0682085
CNAG_00171	2742	2753	2511	4643	7482	4890	2.29234e-31	0.875357	4.08435e-32	139.15	1.83446	30.6397
CNAG_00172	1957	880	1102	1113	1293	961	0.308842	-0.400256	0.268641	1.22367	0.757724	0.510264
CNAG_12029	6	11	10	17	17	23	0.190324	0.919875	0.159428	1.97964	1.89195	0.720506
CNAG_00173	2698	2672	2368	2564	4403	2928	0.107675	0.139577	0.0867718	2.93327	1.10158	0.967884
CNAG_00174	9457	8907	8773	6369	9787	6422	2.06084e-10	-0.474927	8.29488e-11	42.187	0.719503	9.68595
CNAG_00175	5527	4977	4911	2910	4540	2982	6.84037e-22	-0.773294	1.65296e-22	95.2797	0.58508	21.1649
CNAG_00176	12179	11424	11110	10311	19485	13858	0.28857	0.10967	0.249365	1.32686	1.07898	0.539749
CNAG_00177	1865	1478	1347	1565	1973	1737	0.965177	-0.0062535	0.959467	0.0025829	0.995675	0.0153932
CNAG_00178	7721	7429	7205	7940	11930	8363	0.0658208	0.132354	0.0515279	3.79103	1.09608	1.18164
CNAG_12030	93	70	100	77	82	91	0.453458	-0.243824	0.409358	0.680666	0.844504	0.343463
CNAG_00179	309	359	254	667	685	649	5.58097e-08	0.960192	2.59023e-08	30.9925	1.94557	7.25329
CNAG_12031	8	5	11	16	9	9	0.680739	0.362876	0.643341	0.214399	1.28599	0.167019
CNAG_00180	4748	5444	4389	2296	4462	2791	2.60334e-15	-0.838199	8.19463e-16	64.8228	0.559342	14.5845
CNAG_00181	4532	5244	4267	8477	15087	9430	1.55703e-27	1.01065	3.07862e-28	121.429	2.01482	26.8077
CNAG_00182	5226	5886	5025	4297	7916	5236	0.274058	-0.109217	0.235605	1.4067	0.927091	0.562157
CNAG_12032	100	113	97	642	995	899	5.60542e-62	2.83933	5.02144e-63	280.802	7.15688	61.2514
CNAG_00183	3105	3792	2837	25887	30422	24314	2.74625e-125	2.87585	1.07037e-126	573.309	7.34034	124.561
CNAG_12033	46	85	34	71	110	100	0.113128	0.586096	0.0914178	2.84923	1.50118	0.94643
CNAG_12034	204	237	232	365	579	469	8.0324e-08	0.866443	3.77072e-08	30.2639	1.82316	7.09515
CNAG_00184	10251	10325	9697	9571	15234	10886	0.695915	0.029765	0.658716	0.195087	1.02085	0.157444
CNAG_00185	7066	6837	6443	5270	8845	5574	0.00071387	-0.265165	0.00045292	12.3002	0.832103	3.14638
CNAG_00186	642	840	638	1799	3795	2364	1.21474e-32	1.67401	2.08469e-33	145.059	3.19101	31.9155
CNAG_00187	4775	5097	4373	5759	8744	6340	2.64956e-06	0.347405	1.37559e-06	23.3145	1.27227	5.57683
CNAG_00188	2602	2724	2273	2151	3720	2337	0.264121	-0.106544	0.226278	1.46411	0.92881	0.578197
CNAG_00189	3384	3279	3038	2971	5318	3560	0.456878	0.0696021	0.413124	0.669793	1.04943	0.340199
CNAG_00190	11630	11426	11177	19740	34071	22939	1.19211e-34	0.946625	1.92784e-35	154.365	1.92736	33.9237
CNAG_00191	1220	1137	984	781	919	774	1.25624e-06	-0.608826	6.3838e-07	24.7927	0.65573	5.90093
CNAG_12035	14	24	12	46	76	42	0.000994599	1.49885	0.000637592	11.6629	2.82616	3.00235
CNAG_00192	2087	2030	2146	6672	9037	6945	2.42591e-71	1.66062	1.90903e-72	324.04	3.16153	70.6151
CNAG_00193	22886	19658	20216	24074	39100	27348	0.000111413	0.317769	6.5742e-05	15.9296	1.2464	3.95307
CNAG_00194	3406	2445	2234	9347	14286	10645	2.22745e-52	1.88759	2.44463e-53	236.361	3.70016	51.6522
CNAG_00195	2915	3542	2669	3389	5524	4082	0.00318521	0.305572	0.00214909	9.41763	1.23591	2.49686
CNAG_12036	6	8	3	9	18	23	0.0912302	1.38028	0.0727968	3.2188	2.60319	1.03986
CNAG_12037	71	111	87	414	551	330	2.78005e-22	2.06554	6.61475e-23	97.093	4.18591	21.5559
CNAG_07316	4919	4399	4364	61408	97838	59599	0	3.78375	0	1713.83	13.7728
CNAG_07317	5054	4935	4449	8099	12225	7820	1.11743e-22	0.755541	2.60069e-23	98.9415	1.68826	21.9518
CNAG_07318	12559	11370	10829	6774	12329	8206	1.0885e-10	-0.568649	4.31252e-11	43.4666	0.674248	9.96317
CNAG_07319	7896	9485	8569	6138	11816	6848	0.00725733	-0.30094	0.00509324	7.84603	0.811723	2.13922
CNAG_07320	5924	5277	5092	6043	9295	6317	0.00964351	0.203965	0.00684305	7.31371	1.15186	2.01576
CNAG_07321	1315	1259	1247	740	1059	652	2.23968e-14	-0.847574	7.3409e-15	60.5045	0.555718	13.6498
CNAG_07322	9409	9198	8331	5371	8288	5847	1.81127e-23	-0.670251	4.12588e-24	102.588	0.628397	22.742
CNAG_07323	7777	7097	6887	6060	9625	6501	0.0163806	-0.181955	0.0119196	6.32279	0.881507	1.78567
CNAG_07324	3929	3567	3409	2330	3427	2645	1.02681e-11	-0.573186	3.85086e-12	48.199	0.672131	10.9885
CNAG_07325	3326	4622	3237	3334	5017	3444	0.32508	-0.124957	0.284415	1.14587	0.917031	0.488009
CNAG_07326	9700	10017	8881	6015	9720	7182	2.25678e-12	-0.525377	8.17603e-13	51.2394	0.694777	11.6465
CNAG_07327	712	727	631	818	1119	884	0.0238072	0.255966	0.0176978	5.62582	1.19414	1.62329
CNAG_07328	2910	2388	2847	2262	4620	2592	0.859827	-0.0258852	0.83823	0.0416804	0.982218	0.0655889
CNAG_07329	11432	10659	9805	9879	12642	8839	0.0242333	-0.213671	0.0180326	5.59298	0.86234	1.61559
CNAG_07330	466	448	315	229	273	263	4.07225e-06	-0.85194	2.14093e-06	22.4642	0.554039	5.39017
CNAG_07331	248	278	204	334	412	294	0.0663184	0.32569	0.0519338	3.7779	1.25326	1.17837
CNAG_07332	2094	2108	1863	1874	3614	2440	0.13304	0.16332	0.108842	2.57096	1.11986	0.876018
CNAG_07333	21665	18970	19566	10392	16017	11457	5.72853e-29	-0.874622	1.08305e-29	128.071	0.545397	28.242
CNAG_07334	20318	16814	18118	11149	21285	11462	5.55982e-07	-0.570491	2.7634e-07	26.4084	0.673388	6.25494
CNAG_07335	2802	2650	2724	1873	2942	1695	1.17593e-07	-0.547315	5.60464e-08	29.4955	0.684293	6.92962
CNAG_07336	259	250	221	154	262	159	0.0015541	-0.560493	0.00101549	10.7991	0.678071	2.80852
CNAG_07337	6195	5229	5032	4639	8158	5525	0.54791	-0.0612349	0.50425	0.44598	0.958443	0.261291
CNAG_07030	2488	2290	2212	2661	4179	2865	0.00110645	0.265331	0.000711622	11.4586	1.20191	2.95607
CNAG_07029	6764	6200	6227	6954	12210	7894	0.00136806	0.274433	0.000888005	11.0476	1.20952	2.86389
CNAG_07028	8270	9860	7573	4972	9073	6193	4.37151e-08	-0.562306	2.01267e-08	31.4823	0.677219	7.35937
CNAG_07027	4984	4572	4436	4784	7184	4959	0.381952	0.0702997	0.339324	0.912986	1.04993	0.417992
CNAG_07338	2343	2456	2389	2829	5318	3039	0.000146251	0.403993	8.74033e-05	15.391	1.32317	3.8349
CNAG_07339	3765	3487	3397	4344	7914	5207	5.57538e-08	0.491532	2.58625e-08	30.9955	1.40594	7.25373
CNAG_07340	2417	2415	2264	3593	5694	3997	1.81167e-20	0.696585	4.6491e-21	88.6767	1.62066	19.7419
CNAG_07341	3241	2495	2865	11773	21595	14843	3.02269e-85	2.26446	1.94107e-86	388.3	4.80475	84.5196
CNAG_07342	4715	4766	4186	3690	5589	3941	0.000555631	-0.250772	0.000348902	12.7877	0.840447	3.25521
CNAG_00229	1067	1221	1040	1543	2198	1758	2.47079e-07	0.531318	1.20085e-07	28.0197	1.44525	6.60716
CNAG_07948	757	1131	861	642	1250	839	0.149426	-0.234393	0.123135	2.37699	0.850043	0.825574
CNAG_00231	2224	2239	2242	1800	2465	1765	0.000186262	-0.351084	0.000112606	14.9126	0.783995	3.72987
CNAG_00232	33461	34645	30274	11823	18520	14326	9.27673e-69	-1.33982	7.58713e-70	312.108	0.39507	68.0326
CNAG_00233	2620	2885	2556	3233	5521	3884	7.81148e-07	0.435307	3.9154e-07	25.7356	1.3522	6.10727
CNAG_00234	1743	1594	1461	1537	2300	1684	0.979346	0.00253567	0.97668	0.000854501	1.00176	0.00906404
CNAG_00235	11654	11514	10236	12330	10658	10683	0.623036	-0.130729	0.581562	0.303717	0.91337	0.205487
CNAG_00236	1630	1347	1372	3149	3109	3017	1.87007e-10	0.936723	7.50388e-11	42.383	1.91418	9.72814
CNAG_00237	30542	28488	26920	28275	45104	31866	0.240304	0.0846111	0.204386	1.61075	1.0604	0.619239
CNAG_00238	44005	38143	37759	16164	25215	18547	2.08652e-52	-1.20453	2.28479e-53	236.496	0.43391	51.6806
CNAG_00239	5220	5480	4692	7553	10104	7048	1.3541e-08	0.489669	6.01823e-09	33.8288	1.40412	7.86835
CNAG_00240	5283	5028	4606	3974	6279	4204	0.000607754	-0.25403	0.000383061	12.6131	0.838551	3.21627
CNAG_00241	3838	3959	3431	3538	4141	3126	0.0338372	-0.234148	0.0256103	4.98214	0.850187	1.47061
CNAG_00242	304	260	210	336	296	302	0.589906	0.126731	0.547333	0.362116	1.09182	0.229217
CNAG_00243	1864	1870	1745	1879	2583	1810	0.980396	-0.00225792	0.977969	0.000762571	0.998436	0.00859865
CNAG_12038	124	142	88	1355	1821	1224	2.28747e-109	3.44427	1.07553e-110	499.753	10.885	108.641
CNAG_07344	5811	5014	5151	3727	5772	3923	5.31234e-08	-0.459568	2.45898e-08	31.0935	0.727204	7.27471
CNAG_00246	5580	5226	5076	6120	9861	6168	0.00106677	0.26454	0.000685047	11.5294	1.20125	2.97193
CNAG_00247	582	543	589	16203	32875	19546	0	5.08375	0	1533.06	33.9127
CNAG_00248	2344	2091	2060	2251	3598	2460	0.100401	0.145721	0.0804997	3.05478	1.10628	0.998262
CNAG_00249	9164	8215	8043	4728	7216	4874	7.74959e-26	-0.802735	1.60707e-26	113.584	0.573262	25.1107
CNAG_12039	586	497	551	730	1024	926	0.000179345	0.524772	0.000108202	14.9879	1.43871	3.74631
CNAG_00250	1342	991	868	1038	804	715	0.211456	-0.45645	0.177967	1.81452	0.728778	0.674779
CNAG_00251	81	69	76	593	1097	837	4.45212e-76	3.2678	3.22258e-77	345.954	9.63177	75.3514
CNAG_00252	1340	1154	1215	1082	1958	1307	0.948685	0.00793118	0.940586	0.00555527	1.00551	0.0228779
CNAG_00253	3994	3756	3627	3205	6214	4065	0.87354	0.0179753	0.853903	0.0339077	1.01254	0.0587173
CNAG_12040	149	145	139	120	216	144	0.759481	-0.0691103	0.72753	0.121391	0.953226	0.119483
CNAG_00254	2553	2802	2528	2982	6100	3564	9.44319e-05	0.443676	5.53014e-05	16.2571	1.36007	4.02488
CNAG_00255	3438	3261	2851	2879	3742	2876	0.041885	-0.193888	0.0320538	4.59562	0.874246	1.37794
CNAG_00256	12073	10199	9899	4664	6707	5161	2.36371e-39	-1.15492	3.33703e-40	176.162	0.44909	38.6264
CNAG_00257	15935	14180	14436	11793	18932	12540	0.00122758	-0.255055	0.000793626	11.2561	0.837955	2.91095
CNAG_00258	3343	2905	2735	2271	3563	2680	0.00249868	-0.279222	0.00166764	9.88354	0.824035	2.60229
CNAG_00259	3392	3538	2960	3104	3051	3066	0.0805731	-0.253476	0.0638443	3.43459	0.838873	1.09381
CNAG_00260	7721	7798	6846	5690	8291	6375	1.00428e-05	-0.331255	5.43149e-06	20.6788	0.794845	4.99814
CNAG_00261	196867	195493	181811	63407	56600	55510	4.36287e-36	-1.85674	6.72083e-37	161.035	0.276099	35.3602
CNAG_00262	43	93	45	549	497	376	5.53878e-22	2.8217	1.33158e-22	95.7078	7.06993	21.2566
CNAG_00263	3830	4222	3801	5093	7545	5191	1.34151e-06	0.384864	6.83037e-07	24.6624	1.30574	5.87241
CNAG_00264	15695	18026	15256	23276	39137	26304	3.18827e-15	0.642754	1.00713e-15	64.4165	1.56131	14.4964
CNAG_00265	2462	2777	2359	2893	3997	3154	0.0245564	0.211638	0.018276	5.56949	1.158	1.60983
CNAG_00266	2465	3213	2581	1792	3058	2020	1.58788e-05	-0.481866	8.73513e-06	19.7698	0.716051	4.79918
CNAG_00267	2511	2620	2525	2221	3759	2654	0.677214	-0.0405432	0.63934	0.219606	0.972289	0.169274
CNAG_00268	17407	17839	16392	8420	10607	8961	2.45818e-31	-1.06463	4.38287e-32	139.01	0.478095	30.6094
CNAG_00269	226	203	276	6697	13300	7073	2.18677e-208	5.01441	3.51745e-210	957.253	32.3213	207.66
CNAG_12041	106	85	96	310	534	351	1.51478e-23	1.84014	3.43926e-24	102.949	3.58044	22.8197
CNAG_00270	6574	7099	5985	3996	7166	4911	1.14081e-08	-0.507429	5.04487e-09	34.172	0.703475	7.94279
CNAG_00271	3261	3518	2868	1785	2741	2002	2.39439e-19	-0.764515	6.37852e-20	83.4979	0.588651	18.6208
CNAG_00272	10968	10168	9363	8163	14372	9767	0.119133	-0.133555	0.0966686	2.75966	0.911583	0.923967
CNAG_00273	900	853	772	1433	2232	1474	4.52685e-18	0.817224	1.26978e-18	77.5874	1.76201	17.3442
CNAG_00274	3799	3525	3169	3634	5662	3654	0.273353	0.0948467	0.234964	1.41056	1.06795	0.563277
CNAG_00275	3082	3247	2864	5775	10397	7309	2.17754e-36	1.13601	3.31669e-37	162.439	2.19772	35.662
CNAG_00276	1118	1217	1207	3876	6646	4630	2.38924e-82	1.87975	1.61115e-83	374.892	3.6801	81.6217
CNAG_00277	3650	3934	3247	2766	4928	3335	0.0425927	-0.190267	0.0326428	4.56442	0.876443	1.37066
CNAG_00278	3444	3620	3076	3276	5391	3556	0.504137	0.0574158	0.460036	0.545807	1.0406	0.297451
CNAG_00279	12658	15901	11842	9206	14837	9447	1.89505e-06	-0.481978	9.75426e-07	23.976	0.715995	5.72238
CNAG_00280	11655	11355	10495	6858	12346	8405	2.39766e-09	-0.498078	1.01994e-09	37.2864	0.70805	8.62021
CNAG_07345	1559	1535	1479	1730	2902	1847	0.00181961	0.285132	0.00119709	10.4948	1.21852	2.74002
CNAG_07114	4226	4305	3903	3675	6809	4609	0.557553	0.0583415	0.514436	0.425034	1.04127	0.253714
CNAG_07346	18791	18061	16601	8803	14657	10312	6.89107e-34	-0.873167	1.14254e-34	150.828	0.545947	33.1617
CNAG_00283	4051	4216	4000	8637	14102	9984	1.72544e-56	1.20457	1.73355e-57	255.392	2.30469	55.7631
CNAG_00284	2377	2269	2158	5743	9496	6675	5.89878e-80	1.47638	4.13104e-81	363.828	2.7825	79.2292
CNAG_00285	7158	6332	6321	2974	5008	3086	1.78775e-33	-1.05919	3.00391e-34	148.908	0.479901	32.7477
CNAG_00286	7874	7448	6794	7129	9947	7386	0.556625	-0.0483514	0.513442	0.427046	0.967041	0.254437
CNAG_00287	15653	16666	14043	8482	15710	10422	6.46481e-13	-0.642842	2.27972e-13	53.7476	0.64045	12.1894
CNAG_00288	5555	5998	4704	5504	9736	6425	0.0349994	0.198146	0.0265462	4.92009	1.14722	1.45594
CNAG_00289	3051	3240	2907	1717	2720	1738	6.33689e-21	-0.786948	1.59481e-21	90.7934	0.579569	20.1981
CNAG_00290	7387	6711	6323	6181	10053	6828	0.67339	-0.0350869	0.635063	0.225257	0.975973	0.171733
CNAG_12042	62	51	44	70	126	119	0.00990663	0.808033	0.00703834	7.26316	1.75082	2.00407
CNAG_00291	3534	3275	2913	4162	5984	4165	1.3141e-05	0.359414	7.18835e-06	20.1424	1.2829	4.88137
CNAG_00292	10629	11507	9315	11034	12926	10918	0.846831	-0.0230736	0.822946	0.0500675	0.984134	0.0722032
CNAG_00293	9307	9725	8330	7398	11557	7604	0.000608756	-0.251374	0.000383768	12.6096	0.840096	3.21556
CNAG_00294	6922	6734	6148	5288	7975	5420	4.44617e-05	-0.288779	2.54491e-05	17.7307	0.818595	4.35201
CNAG_07347	29106	27065	25800	35203	66833	42304	8.37572e-11	0.588731	3.29557e-11	43.993	1.50392	10.077
CNAG_07348	4224	3896	3607	2318	4042	2693	7.41468e-12	-0.589671	2.75321e-12	48.857	0.664494	11.1299
CNAG_07349	4256	4327	4079	2653	4020	2761	3.14041e-17	-0.630677	9.16633e-18	73.6843	0.645873	16.503
CNAG_00299	3302	3294	3087	1813	2778	2281	8.21272e-14	-0.692446	2.75586e-14	57.9014	0.618804	13.0855
CNAG_00300	10275	10627	10015	12906	21701	14959	4.5221e-10	0.466477	1.8498e-10	40.6192	1.38173	9.34466
CNAG_00301	29941	27492	26486	59588	99457	67480	5.79053e-63	1.21895	5.09412e-64	285.362	2.32777	62.2373
CNAG_00302	2573	2566	2346	5138	6773	5275	6.01739e-32	1.01115	1.05799e-32	141.833	2.01551	31.2206
CNAG_00303	268	325	288	708	1152	742	1.54275e-24	1.3477	3.36152e-25	107.557	2.54505	23.8117
CNAG_00304	632	949	740	464	803	714	0.0150499	-0.430307	0.0109197	6.47834	0.742104	1.82247
CNAG_00305	15604	14099	13333	9519	18142	12093	0.000463307	-0.338433	0.000289037	13.1401	0.7909	3.33413
CNAG_07949	220	243	203	338	418	370	0.000647987	0.578281	0.000409382	12.4889	1.49307	3.18843
CNAG_12043	30	68	28	68	85	51	0.23332	0.508568	0.197897	1.65782	1.42264	0.632049
CNAG_12044	133	316	158	522	848	588	1.65859e-09	1.48535	6.98569e-10	38.0246	2.79985	8.78026
CNAG_00306	2840	2775	2646	17738	22630	14964	1.36929e-134	2.55078	4.74388e-136	616.311	5.85949	133.864
CNAG_00307	6250	6872	5830	4661	7781	5254	0.000105771	-0.311656	6.23212e-05	16.0308	0.805716	3.97563
CNAG_12045	48	90	59	99	184	121	0.00592286	0.816011	0.00411639	8.23174	1.76053	2.22747
CNAG_00308	5795	6052	5618	5680	10143	6169	0.245237	0.107024	0.208855	1.57935	1.077	0.610414
CNAG_00309	7541	7504	7657	12752	23918	15192	2.3427e-24	0.962525	5.15092e-25	106.711	1.94872	23.6303
CNAG_00310	2110	1900	1871	1567	2666	1823	0.0703476	-0.171946	0.0553154	3.67255	0.887644	1.15275
CNAG_00311	13744	13995	12351	18817	32341	20382	4.9208e-16	0.616546	1.50449e-16	68.164	1.5332	15.308
CNAG_00312	2333	2076	1954	1416	2652	1668	0.000360025	-0.374096	0.000222198	13.6334	0.771589	3.44367
CNAG_00313	2922	2707	2777	3116	5474	3414	0.0018699	0.29048	0.00123249	10.441	1.22305	2.72818
CNAG_00314	1946	1828	1771	3418	6173	3870	2.19491e-30	1.05545	4.0221e-31	134.608	2.07836	29.6586
CNAG_12046	298	301	275	644	1091	733	5.33911e-25	1.28359	1.14749e-25	109.687	2.43444	24.2725
CNAG_07350	1944	2063	2054	2369	3693	2398	0.00426052	0.268016	0.00291731	8.85848	1.20415	2.37054
CNAG_00316	3549	3885	3457	2181	3423	2422	8.31389e-16	-0.647153	2.56556e-16	67.1117	0.638539	15.0802
CNAG_12047	185	171	137	173	197	191	0.937692	0.0182847	0.927366	0.00830997	1.01275	0.0279397
CNAG_00317	2554	2502	2301	2400	3688	2452	0.93234	0.0076337	0.920919	0.00985571	1.00531	0.0304258
CNAG_00318	5301	5456	5064	3857	7167	4530	0.00658762	-0.250677	0.0045996	8.03051	0.840502	2.18127
CNAG_00319	8715	7179	7511	3994	6575	4783	2.64781e-18	-0.817676	7.33864e-19	78.6704	0.567355	17.5771
CNAG_00320	2669	2190	2155	2136	3049	2181	0.220677	-0.126857	0.186465	1.74533	0.915825	0.656242
CNAG_00321	942	752	837	602	841	686	0.000693867	-0.442934	0.000439443	12.3565	0.735637	3.15872
CNAG_00322	3584	3548	3439	2710	4520	2829	0.000626338	-0.290106	0.000395394	12.5538	0.817842	3.20319
CNAG_12048	615	602	540	585	1017	641	0.276243	0.134452	0.237688	1.39426	1.09768	0.558709
CNAG_00323	54	87	72	41	23	18	0.000785549	-1.51362	0.000499497	12.1175	0.350233	3.10483
CNAG_07351	8024	7903	7798	8870	13677	9383	0.00245705	0.22009	0.00163834	9.91616	1.16481	2.60959
CNAG_00326	10610	11098	9778	7766	12188	8770	1.28745e-06	-0.337513	6.54397e-07	24.745	0.791404	5.89027
CNAG_00327	854	630	648	506	611	503	0.000156114	-0.575532	9.35292e-05	15.263	0.671039	3.80656
CNAG_00328	5585	5051	5078	2930	4835	3275	5.80316e-19	-0.722694	1.5646e-19	81.7243	0.605965	18.2363
CNAG_12049	20	9	14	53	59	45	0.00040243	1.68925	0.000249863	13.4132	3.22488	3.39531
CNAG_00329	8230	7500	7037	4323	6002	4386	4.22166e-25	-0.824566	9.03672e-26	110.161	0.564652	24.3745
CNAG_00330	2871	2794	2603	3882	5237	3795	9.71683e-08	0.449881	4.59872e-08	29.879	1.36593	7.01248
CNAG_00331	246	223	179	610	900	609	2.37083e-26	1.5092	4.83729e-27	115.965	2.84652	25.6251
CNAG_00332	8595	7564	7750	35920	61099	41337	2.58661e-165	2.31638	6.3369e-167	758.285	4.98081	164.587
CNAG_00333	4941	4634	4253	1599	2325	1659	1.07611e-80	-1.50797	7.42968e-82	367.25	0.351607	79.9681
CNAG_00334	190571	174304	165505	47326	67121	57096	1.11546e-91	-1.81711	6.51446e-93	418.041	0.283788	90.9525
CNAG_00335	4875	5023	4304	5088	8013	5425	0.0183048	0.176037	0.0134104	6.11415	1.12978	1.73744
CNAG_00336	4028	3740	3634	6432	9421	6652	1.27198e-25	0.779407	2.65664e-26	112.588	1.71643	24.8955
CNAG_00337	33918	29965	27456	34790	60939	37398	0.000268296	0.322622	0.000164058	14.2036	1.2506	3.57139
CNAG_07352	16346	15958	14922	9362	13845	9589	8.76783e-28	-0.729003	1.7195e-28	122.584	0.603321	27.0571
CNAG_07354	3197	3099	2941	1675	2824	1924	3.36159e-19	-0.73795	9.00917e-20	82.8153	0.599591	18.4735
CNAG_07355	961	928	776	876	1693	1001	0.123782	0.19391	0.10067	2.6949	1.14386	0.907342
CNAG_00342	7672	7290	7033	5208	8103	5431	8.33302e-10	-0.439944	3.46333e-10	39.3942	0.737163	9.0792
CNAG_00343	2981	2804	2526	2085	3105	2199	4.70335e-06	-0.370683	2.48261e-06	22.1799	0.773416	5.32759
CNAG_00344	3248	2612	2739	1375	2260	1558	3.01038e-20	-0.938958	7.76991e-21	87.6608	0.521609	19.5214
CNAG_00345	7092	7190	6775	3788	6246	4017	4.33259e-26	-0.799539	8.92036e-27	114.752	0.574533	25.3633
CNAG_00346	2652	2441	2480	1739	3073	1807	2.8299e-05	-0.420506	1.59213e-05	18.6239	0.747163	4.54823
CNAG_00347	7503	6702	6862	3463	5912	3997	1.06105e-24	-0.87229	2.2988e-25	108.31	0.546279	23.9743
CNAG_00348	564	600	539	818	1257	762	8.3987e-06	0.524287	4.5163e-06	21.0322	1.43822	5.07579
CNAG_00349	877	905	745	331	438	368	7.11184e-26	-1.33836	1.47305e-26	113.757	0.395469	25.148
CNAG_12050	251	184	161	272	307	191	0.425266	0.18901	0.381803	0.764889	1.13998	0.371339
CNAG_07356	25184	24782	22472	28543	46505	30982	4.34079e-07	0.337671	2.14193e-07	26.9006	1.26372	6.36243
CNAG_07253	1818	1623	1613	1348	2448	1625	0.265897	-0.119562	0.22803	1.45311	0.920467	0.575286
CNAG_00351	1574	1818	1343	1888	2390	1643	0.28475	0.135715	0.245783	1.34712	1.09864	0.545536
CNAG_00352	4366	4712	3895	3265	5636	3571	0.0018433	-0.274397	0.00121427	10.4685	0.826796	2.7344
CNAG_00353	1603	1591	1431	1046	1786	1224	1.66178e-05	-0.402433	9.17045e-06	19.6769	0.756581	4.77943
CNAG_00354	26350	23514	22890	27433	44508	31262	9.37972e-05	0.295015	5.49181e-05	16.2703	1.2269	4.02781
CNAG_00355	9621	11771	8600	6710	9740	6584	8.41435e-09	-0.57966	3.68974e-09	34.7809	0.669121	8.07498
CNAG_00356	15074	14562	13526	12113	20445	13325	0.0882372	-0.128094	0.0702666	3.27678	0.91504	1.05435
CNAG_00357	891	1021	833	932	1486	1058	0.223842	0.134716	0.189332	1.72281	1.09788	0.650058
CNAG_00358	2017	2148	1954	1505	2357	1673	3.888e-05	-0.351328	2.21725e-05	17.993	0.783862	4.41027
CNAG_00359	1945	1615	1509	1189	1535	1087	2.06532e-07	-0.600671	9.98926e-08	28.3761	0.659447	6.68501
CNAG_12051	109	139	86	107	215	119	0.520168	0.172471	0.476596	0.506643	1.12699	0.283856
CNAG_00360	1223	1473	1207	1266	1863	1276	0.811706	-0.0279935	0.783786	0.0752894	0.980783	0.0906011
CNAG_00361	11241	10610	10109	8551	14831	9472	0.0254071	-0.180054	0.0189469	5.50641	0.88267	1.59505
CNAG_00362	3968	3873	3233	2808	4752	3263	0.00548358	-0.243728	0.0038016	8.37623	0.84456	2.26094
CNAG_00363	27822	26780	25766	15151	23006	16001	2.3405e-32	-0.7749	4.0659e-33	143.732	0.584429	31.6307
CNAG_00364	3518	3527	3005	2370	3678	2571	5.38434e-08	-0.425739	2.49431e-08	31.0658	0.744457	7.26887
CNAG_00365	6544	6248	5975	4809	8461	5226	0.00429954	-0.24384	0.00294563	8.84084	0.844494	2.36658
CNAG_12052	56	72	72	144	200	159	5.07571e-06	1.13347	2.68733e-06	22.0278	2.19386	5.2945
CNAG_00366	212	193	246	435	851	592	7.47985e-14	1.29911	2.50069e-14	58.0926	2.46078	13.1261
CNAG_00367	1661	1711	1488	1026	1694	1139	2.02661e-09	-0.543906	8.57837e-10	37.624	0.685911	8.69323
CNAG_00368	4579	4252	4098	2990	5077	3593	1.64297e-05	-0.361526	9.05847e-06	19.7004	0.778341	4.78437
CNAG_00369	4788	5288	4426	5227	9100	6037	0.0016251	0.273084	0.0010637	10.7133	1.20839	2.78912
CNAG_00370	52494	51353	46383	13849	21796	16357	3.58805e-130	-1.73331	1.30079e-131	595.906	0.300761	129.445
CNAG_00371	1374	1548	1247	12809	25288	14681	7.38011e-194	3.42846	1.34234e-195	890.174	10.7663	193.132
CNAG_00372	5648	5254	5056	7251	11845	7683	1.89026e-12	0.532577	6.82946e-13	51.5927	1.44651	11.7235
CNAG_00373	985	971	944	2420	3994	2992	5.23472e-56	1.48917	5.30467e-57	253.164	2.80728	55.2811
CNAG_00374	4113	3614	3541	10788	15976	9790	9.85343e-58	1.48925	9.61934e-59	261.153	2.80743	57.0064
CNAG_00375	9577	8869	8242	4506	7396	5350	3.2146e-27	-0.837252	6.40772e-28	119.975	0.559709	26.4929
CNAG_10008	14	13	7	11	11	2	0.440308	-0.6928	0.39656	0.718732	0.618652	0.356244
CNAG_10009	6	6	2	6	1	6	0.909364	-0.150081	0.894849	0.0174692	0.9012	0.0412623
CNAG_07357	103	88	74	60	59	74	0.0591147	-0.609879	0.0460732	3.97892	0.655252	1.2283
CNAG_00376	97	113	60	79	175	141	0.275917	0.338339	0.237339	1.39633	1.2643	0.559221
CNAG_00377	16480	12838	12775	9601	12144	9895	6.36589e-08	-0.592538	2.96691e-08	30.729	0.663175	7.19614
CNAG_12053	28	34	34	105	143	99	7.26701e-08	1.65339	3.39972e-08	30.4648	3.14573	7.13864
CNAG_00378	1288	1489	1249	1148	1771	1222	0.105551	-0.165191	0.0849816	2.96696	0.89181	0.976537
CNAG_07950	1014	1316	1240	1981	2888	1830	2.85768e-08	0.697948	1.29872e-08	32.3332	1.6222	7.54399
CNAG_12054	153	142	185	314	540	402	2.78869e-10	1.17056	1.13004e-10	41.5824	2.25099	9.5546
CNAG_07358	925	884	939	965	1677	1242	0.0150284	0.284771	0.0109022	6.48119	1.21822	1.82309
CNAG_00383	12850	11956	11596	10698	18202	12839	0.857426	-0.0159486	0.835147	0.0433079	0.989006	0.0668036
CNAG_00384	1769	1681	1562	655	931	745	4.15974e-39	-1.2984	5.90866e-40	175.026	0.406578	38.3809
CNAG_00385	13140	14757	12141	8434	13270	9168	4.6991e-14	-0.581506	1.55881e-14	59.0225	0.668266	13.328
CNAG_00386	12943	11551	10862	6278	8415	6719	9.61667e-26	-0.910653	2.0002e-26	113.15	0.531944	25.017
CNAG_00387	3061	2823	2810	2243	3689	2581	0.00464643	-0.241736	0.00319373	8.69335	0.845727	2.33288
CNAG_00388	8667	7253	7691	5690	8692	5928	1.48158e-06	-0.424728	7.56006e-07	24.4668	0.744979	5.82927
CNAG_00389	4497	4120	4153	3686	5753	3909	0.0740493	-0.145386	0.0583727	3.58303	0.904138	1.13048
CNAG_07951	1126	1152	1034	735	745	623	1.76799e-08	-0.821497	7.90803e-09	33.2976	0.565855	7.75252
CNAG_00390	4727	4139	4154	3973	6397	4316	0.679345	-0.0375239	0.641856	0.216323	0.974326	0.167909
CNAG_00391	515	555	530	444	538	503	0.0597	-0.286037	0.0465589	3.96126	0.820152	1.22403
CNAG_00392	1147	886	990	1219	2234	1462	0.000128921	0.47787	7.66158e-05	15.64	1.39269	3.88968
CNAG_00393	19202	20750	19513	45537	92657	55732	6.28509e-44	1.46749	8.0566e-45	197.313	2.76541	43.2017
CNAG_00395	3545	3538	3194	3478	5135	3651	0.495543	0.0539857	0.451519	0.566835	1.03813	0.304919
CNAG_00394	606	701	538	1081	1454	1151	8.97861e-12	0.81116	3.35504e-12	48.4693	1.75462	11.0468
CNAG_00396	6777	7094	6394	5490	9024	6218	0.0169435	-0.1786	0.0123439	6.2608	0.88356	1.771
CNAG_00397	1067	1009	921	20644	34237	23054	0	4.4881	0	2840.86	22.4416
CNAG_00398	7514	7717	7814	8148	12261	8382	0.178836	0.113121	0.14903	2.08215	1.08157	0.747545
CNAG_00399	5041	5126	4572	1190	1808	1168	1.80179e-135	-2.03037	6.15312e-137	620.389	0.244793	134.744
CNAG_00400	4943	5866	4645	2284	3671	2116	5.50919e-28	-1.15374	1.07225e-28	123.521	0.449457	27.2589
CNAG_00401	3832	4080	3608	4330	7646	4706	0.000409495	0.311433	0.000254452	13.379	1.24094	3.38775
CNAG_00402	36818	33168	31858	25944	42268	28405	9.57568e-05	-0.28781	5.61721e-05	16.2275	0.819145	4.01883
CNAG_00403	2356	2324	2135	3940	6707	4427	3.63869e-31	0.929287	6.53271e-32	138.217	1.90433	30.4391
CNAG_12055	2	10	7	1	0	0	0.0161517	-4.33006	0.011739	6.34986	0.0497189	1.79178
CNAG_00404	3879	3374	3550	4614	7052	4478	6.1452e-05	0.368242	3.55391e-05	17.0959	1.29078	4.21146
CNAG_00405	7636	7125	6882	4761	7136	4746	7.50398e-15	-0.585185	2.41684e-15	62.6921	0.666564	14.1247
CNAG_00406	1243	793	911	676	662	619	5.87194e-05	-0.748155	3.38788e-05	17.1868	0.595365	4.23122
CNAG_12056	52	77	36	446	594	368	5.76258e-35	2.90137	9.24779e-36	155.824	7.47137	34.2394
CNAG_00407	505828	492486	484889	165900	322292	194529	7.49467e-46	-1.35321	9.27328e-47	206.199	0.391419	45.1252
CNAG_00408	3515	3276	2928	6376	9776	6660	5.96168e-42	1.02617	8.01086e-43	188.161	2.03661	41.2246
CNAG_00409	20577	20103	18414	15399	24928	16786	0.000103853	-0.260227	6.11144e-05	16.0678	0.834957	3.98358
CNAG_00410	15367	14767	13726	10772	18285	12171	3.33417e-05	-0.304821	1.88862e-05	18.2984	0.809543	4.47701
CNAG_00411	5024	4695	4256	3290	4862	3500	1.3701e-09	-0.461907	5.74859e-10	38.405	0.726026	8.86325
CNAG_00412	284	327	245	555	646	498	4.07049e-07	0.811577	2.00503e-07	27.0283	1.75513	6.39035
CNAG_00413	22600	20130	19363	20589	32779	20653	0.64293	0.0404319	0.602217	0.271665	1.02842	0.191836
CNAG_00414	2543	2297	2223	1903	3472	2062	0.144981	-0.152298	0.119293	2.42658	0.899816	0.838688
CNAG_00415	2000	1779	1878	2335	3608	2443	8.58071e-05	0.358583	5.01019e-05	16.4442	1.28217	4.06648
CNAG_00416	818	717	627	985	1709	1115	1.39015e-07	0.602345	6.65316e-08	29.1632	1.51818	6.85694
CNAG_00417	81386	76483	74877	40480	66730	48724	1.05586e-25	-0.787353	2.20133e-26	112.96	0.579406	24.9764
CNAG_00418	24810	21068	19504	11772	12523	10687	6.8997e-18	-1.06626	1.95671e-18	76.7334	0.477556	17.1612
CNAG_12057	1162	1225	1038	1117	1704	1305	0.508648	0.069428	0.464781	0.534355	1.0493	0.293583
CNAG_00419	410	395	325	226	365	254	2.84183e-05	-0.62488	1.59954e-05	18.615	0.648474	4.5464
CNAG_00420	2514	2574	2251	1909	2986	2045	0.0003458	-0.28732	0.000213034	13.7125	0.819423	3.46118
CNAG_00421	4219	4162	3564	2619	4084	2525	1.68921e-11	-0.582594	6.41447e-12	47.1986	0.667762	10.7723
CNAG_00422	6445	5635	5325	2988	5127	3445	3.18837e-20	-0.804925	8.23721e-21	87.5453	0.572392	19.4964
CNAG_00423	881	721	606	549	447	533	0.00141062	-0.661935	0.000917024	10.988	0.63203	2.85059
CNAG_00424	4780	4969	4382	3877	6752	4542	0.18194	-0.113928	0.151842	2.05365	0.924069	0.740072
CNAG_00426	8154	8127	7582	4753	6717	4624	2.55799e-24	-0.768142	5.63696e-25	106.532	0.587173	23.5921
CNAG_00427	5717	5007	4910	3283	4670	3383	2.92254e-15	-0.661287	9.21384e-16	64.5918	0.632314	14.5342
CNAG_00428	2775	2670	2218	2078	2894	2146	0.00126847	-0.298383	0.00082085	11.1935	0.813163	2.89672
CNAG_00429	420	454	435	430	417	402	0.218542	-0.228853	0.184498	1.76102	0.853313	0.660466
CNAG_00430	609	695	590	825	1256	944	2.34751e-05	0.474453	1.31173e-05	18.9934	1.38939	4.62939
CNAG_07359	20344	18886	18257	10916	16384	11747	1.59592e-28	-0.760608	3.05084e-29	126.016	0.590247	27.797
CNAG_00433	1426	1458	1234	27054	44141	29811	0	4.40605	0	2895.02	21.2009
CNAG_00434	2794	3160	2494	1240	1941	1357	1.7475e-32	-1.10088	3.02494e-33	144.32	0.466233	31.7576
CNAG_00435	1218	1097	939	857	1293	919	0.00836015	-0.284544	0.00589824	7.58113	0.821001	2.07779
CNAG_00436	8285	6973	7076	5734	9267	6388	0.00175125	-0.272573	0.00115038	10.5684	0.827842	2.75665
CNAG_00437	1061	1125	985	1259	2242	1360	0.000169574	0.393421	0.000101887	15.1014	1.3135	3.77064
CNAG_00438	2162	2210	1942	1320	2016	1400	8.1594e-14	-0.619256	2.73696e-14	57.915	0.651006	13.0883
CNAG_00439	5998	5364	5095	4562	7685	4906	0.0688546	-0.156692	0.0540903	3.70991	0.897079	1.16207
CNAG_00440	1857	1952	1605	1396	2230	1465	0.00120429	-0.297689	0.000777529	11.2941	0.813555	2.91927
CNAG_00441	33986	28181	28057	15387	17041	14149	1.23315e-21	-1.12393	3.01041e-22	94.093	0.458842	20.909
CNAG_00442	5458	3142	3460	61660	59065	44263	1.02793e-22	3.61664	2.38603e-23	99.1121	12.2664	21.988
CNAG_00443	1052	1019	907	2175	3161	2261	9.37514e-40	1.15216	1.30964e-40	178.023	2.22247	39.028
CNAG_00444	3150	3504	2685	1252	2321	1480	2.11317e-25	-1.10661	4.458e-26	111.561	0.464383	24.6751
CNAG_12058	136	96	124	67	123	56	0.00689947	-0.771566	0.00482843	7.9426	0.585781	2.16118
CNAG_00445	9607	9615	8655	27146	41172	26690	1.78887e-105	1.56145	8.89789e-107	481.748	2.9515	104.747
CNAG_00446	42	55	35	206	194	148	1.71925e-10	1.89382	6.88595e-11	42.5511	3.71617	9.76466
CNAG_00447	14771	14373	13201	6886	12819	8861	2.24813e-18	-0.788224	6.21421e-19	78.999	0.579056	17.6482
CNAG_00448	11833	11035	10397	5066	9197	6742	7.3434e-21	-0.878378	1.85539e-21	90.494	0.543979	20.1341
CNAG_00449	3483	4117	3262	5388	5549	5013	0.0035854	0.394262	0.00243596	9.18808	1.31427	2.44546
CNAG_00450	14797	14168	13536	11288	19103	13858	0.0587395	-0.153253	0.0457589	3.99045	0.89922	1.23107
CNAG_00451	1358	1197	1214	1832	2889	2072	4.01461e-12	0.643065	1.47182e-12	50.0856	1.56164	11.3964
CNAG_00452	443	511	348	33761	62810	38042	0	6.4683	0	2288.18	88.5425
CNAG_00453	40334	39438	35337	147683	314669	165883	9.33014e-78	2.20189	6.64954e-79	353.694	4.60082	77.0301
CNAG_00454	3025	3140	2503	1869	3025	2078	4.14658e-09	-0.520957	1.78495e-09	36.1954	0.696909	8.38231
CNAG_00455	3942	3952	3486	4673	6171	4609	0.00350477	0.252177	0.00237684	9.23306	1.191	2.45534
CNAG_00456	9191	7915	7455	134169	187721	121368	0	3.97403	0	1550.82	15.7146
CNAG_12059	606	658	519	999	1338	1074	1.81518e-10	0.749471	7.27912e-11	42.4425	1.68118	9.74108
CNAG_00457	137890	135023	127411	139273	238261	157460	0.00589831	0.200877	0.00409861	8.2396	1.1494	2.22927
CNAG_00458	7091	6922	6522	7192	10035	7061	0.59061	0.0444534	0.548079	0.360769	1.03129	0.228699
CNAG_07360	2896	2575	2555	2783	3837	2613	0.971926	0.00371549	0.966996	0.001712	1.00258	0.0123666
CNAG_00460	2174	1893	1963	1954	2490	1829	0.233027	-0.132786	0.197592	1.66009	0.912068	0.632594
CNAG_00461	12329	12331	11921	5627	10042	6795	1.45087e-28	-0.923639	2.77177e-29	126.206	0.527178	27.8384
CNAG_00462	12354	12877	11432	21529	37723	23866	1.20623e-34	0.959982	1.95217e-35	154.34	1.94528	33.9186
CNAG_12060	1867	2162	1846	2316	3850	2922	2.53309e-05	0.422319	1.42012e-05	18.8419	1.34008	4.59635
CNAG_00463	4	1	3	1	3	9	0.715456	0.548555	0.679249	0.170972	1.46262	0.145417
CNAG_00464	22120	19172	19647	12629	22680	15874	4.45257e-07	-0.470092	2.19984e-07	26.849	0.721918	6.35139
CNAG_00465	11056	12137	10829	9591	17997	11009	0.645495	-0.0469658	0.605241	0.267163	0.96797	0.190107
CNAG_00466	1982	2195	2055	1095	2071	1310	6.55586e-11	-0.705117	2.56572e-11	44.483	0.613393	10.1834
CNAG_00467	1232	1037	1038	969	1361	948	0.0594496	-0.211381	0.0463416	3.96913	0.86371	1.22585
CNAG_00468	8634	7613	7422	4460	7100	4721	2.51843e-21	-0.750196	6.23219e-22	92.6528	0.594523	20.5989
CNAG_00469	5839	6153	5212	3645	5936	3844	2.51958e-13	-0.570009	8.68229e-14	55.6448	0.673613	12.5987
CNAG_00470	2287	2538	2237	2247	3521	2236	0.75282	-0.0311707	0.720032	0.128462	0.978626	0.123309
CNAG_00471	3746	4037	3421	3009	5302	3735	0.249372	-0.109608	0.212716	1.55285	0.92684	0.603153
CNAG_00472	2102	1915	1823	1104	1858	1294	5.165e-13	-0.668029	1.81114e-13	54.1997	0.629366	12.2869
CNAG_00473	3040	3165	2508	1688	2832	1817	4.85068e-13	-0.67214	1.69672e-13	54.3279	0.627575	12.3142
CNAG_00474	1213	1486	1085	2707	5037	2865	3.60863e-25	1.25929	7.6977e-26	110.478	2.39378	24.4427
CNAG_00475	3239	2570	2413	6535	8718	6900	2.80868e-31	1.24478	5.01823e-32	138.741	2.36983	30.5515
CNAG_00476	57	88	33	151	177	141	0.000122522	1.23127	7.26612e-05	15.7403	2.34774	3.91179
CNAG_07361	6310	7157	6138	9867	16664	10931	2.61692e-18	0.718103	7.2498e-19	78.6945	1.64502	17.5822
CNAG_07362	8546	8342	7243	10287	10730	10314	0.0925311	0.218591	0.0739035	3.19412	1.1636	1.03371
CNAG_07363	18253	13935	14587	12844	21646	17416	0.66711	-0.0540639	0.627985	0.234803	0.963219	0.175802
CNAG_12061	20	14	12	5	11	3	0.0512447	-1.5257	0.0396351	4.23344	0.347311	1.29035
CNAG_00480	8321	8570	7624	3676	5465	4365	1.86007e-39	-1.05587	2.6168e-40	176.646	0.481006	38.7305
CNAG_00482	8508	8655	7986	5014	8429	5539	3.67902e-17	-0.621758	1.07612e-17	73.3677	0.649879	16.4343
CNAG_00483	115579	103270	103477	54713	99829	73702	1.51847e-13	-0.714349	5.16866e-14	56.6646	0.60948	12.8186
CNAG_00484	3385	3386	2947	38420	63370	41221	0	3.66589	0	2208.84	12.6924
CNAG_00485	27703	30507	26099	33381	70528	44560	1.77768e-07	0.581126	8.57604e-08	28.6714	1.49602	6.75015
CNAG_00486	5901	5917	5449	6396	8782	6211	0.168041	0.112916	0.139452	2.18399	1.08141	0.774584
CNAG_00487	896	885	739	914	1352	1061	0.0616596	0.205993	0.0481406	3.90507	1.15348	1.21
CNAG_00488	1137	968	979	7562	14208	8776	2.14401e-179	3.07998	4.58939e-181	823.321	8.45601	178.669
CNAG_07952	265	328	266	473	664	437	7.67099e-06	0.672735	4.11454e-06	21.2107	1.59409	5.11515
CNAG_00490	4460	4782	4218	47010	84285	56412	0	3.58187	0	1598.45	11.9743
CNAG_00491	4152	4421	3837	3835	6329	4117	0.899054	-0.0112578	0.883258	0.0215621	0.992227	0.046214
CNAG_00492	323	317	259	383	470	345	0.160775	0.229837	0.133084	2.25616	1.1727	0.793782
CNAG_00493	8917	7635	7518	7877	10650	7365	0.35952	-0.0897208	0.316949	1.0015	0.939705	0.444277
CNAG_07364	2646	2760	2614	2821	4781	2989	0.0429598	0.181199	0.0329454	4.54861	1.13383	1.36694
CNAG_00495	1340	1393	1169	1810	2611	1889	3.14245e-08	0.49611	1.43358e-08	32.1413	1.41041	7.50273
CNAG_00496	3552	3651	3024	2022	3576	2370	1.87119e-10	-0.576255	7.51301e-11	42.3806	0.670703	9.72788
CNAG_00497	15928	14345	14093	13579	26249	15200	0.475757	0.0764084	0.431725	0.618178	1.05439	0.322615
CNAG_00498	12206	8651	9533	6059	9213	6193	5.73878e-10	-0.707683	2.36311e-10	40.1407	0.612303	9.24118
CNAG_00499	3779	3434	3493	14434	21320	17449	1.37272e-120	2.11747	5.80885e-122	551.544	4.33932	119.862
CNAG_00500	9723	8374	8524	6122	11366	8280	0.0121292	-0.265117	0.00870146	6.8831	0.832131	1.91617
CNAG_00501	651	509	652	287	379	287	2.10181e-12	-1.12402	7.60678e-13	51.3811	0.458813	11.6774
CNAG_00502	3106	3448	3030	2044	2538	1786	2.29862e-13	-0.778233	7.90096e-14	55.8302	0.583081	12.6385
CNAG_12062	7	11	11	17	13	11	0.661866	0.341514	0.622311	0.242633	1.26709	0.17923
CNAG_00503	7113	7148	6624	14972	19292	12929	1.84841e-25	0.983186	3.88802e-26	111.833	1.97683	24.7332
CNAG_00504	4084	4032	3603	3723	4933	3571	0.147571	-0.129899	0.121478	2.39816	0.913895	0.831
CNAG_00505	2767	2216	2261	5737	9685	6041	2.81135e-41	1.34873	3.8229e-42	185.052	2.54688	40.5511
CNAG_00506	1689	1637	1462	2072	3129	1992	2.66171e-05	0.379916	1.49421e-05	18.7449	1.30127	4.57484
CNAG_00507	267	149	125	260	281	255	0.13874	0.399733	0.113866	2.49973	1.31926	0.857797
CNAG_00508	7758	6603	6322	7029	10788	7173	0.466659	0.0664496	0.422603	0.643064	1.04714	0.331
CNAG_00509	17944	17923	16470	8063	12014	8765	1.09556e-58	-1.06052	1.0492e-59	265.568	0.479458	57.9604
CNAG_00510	2306	3067	2220	1757	2575	1665	6.50646e-06	-0.543095	3.46979e-06	21.5375	0.686297	5.18665
CNAG_00511	339	411	353	448	623	414	0.129046	0.227975	0.105319	2.62309	1.17119	0.889255
CNAG_00512	7354	6715	6331	4251	6234	4588	4.56001e-17	-0.635238	1.33945e-17	72.9357	0.643834	16.341
CNAG_00513	2696	3252	2515	4039	4701	4073	0.000416476	0.427039	0.000259048	13.3455	1.34447	3.38041
CNAG_00514	5092	4388	4538	4906	7722	5043	0.175243	0.122378	0.145906	2.11454	1.08853	0.75636
CNAG_00515	2673	2409	2362	2149	3604	2365	0.329511	-0.0902772	0.288699	1.12568	0.939342	0.48213
CNAG_00516	1297	1268	1208	2969	4948	3079	8.4995e-51	1.32513	9.5806e-52	229.055	2.50556	50.0706
CNAG_00517	5319	5199	4534	5076	9795	6249	0.00793534	0.262453	0.00558675	7.67899	1.19952	2.10043
CNAG_07365	3879	4286	3658	2730	4487	3089	7.24047e-07	-0.408733	3.62203e-07	25.8859	0.753285	6.14023
CNAG_00519	14218	12998	12313	2034	2708	2112	2.41734e-209	-2.71707	3.85842e-211	961.668	0.152083	208.617
CNAG_07953	2264	2491	2251	2717	4280	2746	0.00279939	0.263429	0.00187769	9.66542	1.20033	2.55294
CNAG_00520	20206	18610	18047	8447	12845	9138	7.33791e-57	-1.10598	7.3361e-58	257.105	0.464588	56.1344
CNAG_00521	9598	9773	8857	10921	17361	10920	0.000530817	0.260475	0.000332926	12.8754	1.19787	3.27506
CNAG_00522	24161	24123	23041	18353	34784	20135	0.0441912	-0.194724	0.0339663	4.4964	0.87374	1.35466
CNAG_00523	1837	1891	1811	1746	3172	2228	0.15463	0.148522	0.127672	2.32058	1.10843	0.810706
CNAG_00524	7239	6058	6556	13874	24519	16458	8.66412e-39	1.24563	1.24141e-39	173.55	2.37123	38.0623
CNAG_00525	4219	4211	3966	2626	4057	2810	6.81553e-16	-0.591812	2.09391e-16	67.5122	0.663509	15.1665
CNAG_00526	735	610	646	978	1506	1058	2.55589e-08	0.624848	1.15746e-08	32.557	1.54205	7.59246
CNAG_00527	8167	7855	7534	6090	8958	6497	3.1979e-06	-0.329554	1.67057e-06	22.9409	0.795783	5.49514
CNAG_00528	3588	3605	3373	5982	9847	5845	2.65525e-21	0.816825	6.58393e-22	92.5442	1.76152	20.5759
CNAG_00529	1598	1940	1660	17383	33577	15500	3.49669e-123	3.4295	1.40179e-124	563.576	10.7741	122.456
CNAG_12063	71	102	65	155	200	172	0.000118619	0.9663	7.02292e-05	15.8047	1.95382	3.92585
CNAG_07954	313	364	318	375	814	528	0.000829766	0.553266	0.000528742	12.0115	1.4674	3.08104
CNAG_00531	7738	6973	7276	42077	75837	50769	2.73633e-186	2.71716	5.31556e-188	855.225	6.57578	185.563
CNAG_12064	211	284	233	290	545	444	0.00136735	0.601303	0.00088737	11.049	1.51709	2.86412
CNAG_00532	2378	2867	2334	3715	5730	3961	2.08629e-11	0.617272	7.94556e-12	46.7791	1.53397	10.6806
CNAG_00533	9744	8726	9047	10257	17499	12176	0.000170429	0.321606	0.000102443	15.0911	1.24972	3.76846
CNAG_00534	14586	14821	13166	7536	13168	10213	7.0115e-13	-0.670336	2.47684e-13	53.5847	0.62836	12.1542
CNAG_00535	5513	5263	5199	3695	5783	4133	5.58103e-09	-0.438069	2.41693e-09	35.6048	0.738122	8.25329
CNAG_00536	9198	11031	8198	6354	9505	7355	6.97384e-07	-0.487053	3.48347e-07	25.9612	0.713481	6.15653
CNAG_10014	1	0	0	8	15	5	0.00529643	4.44961	0.00366464	8.44294	21.8507	2.27602
CNAG_00537	5123	4689	4310	25630	35918	31908	6.60238e-138	2.54166	2.18119e-139	631.656	5.8226	137.18
CNAG_00538	3108	3590	2804	1908	3082	2269	6.7622e-10	-0.592558	2.79374e-10	39.8137	0.663166	9.16991
CNAG_00539	6552	7085	5293	32292	44480	34456	3.36304e-135	2.36785	1.1568e-136	619.129	5.16171	134.473
CNAG_12065	107	129	75	506	585	471	7.06325e-27	2.15759	1.42191e-27	118.393	4.46168	26.151
CNAG_12066	85	104	50	186	355	245	2.24092e-09	1.50662	9.51046e-10	37.4228	2.84143	8.64957
CNAG_12067	453	526	447	762	1174	827	1.21687e-10	0.749128	4.83164e-11	43.2442	1.68078	9.91476
CNAG_00540	77	76	57	76	138	59	0.660084	0.145244	0.620473	0.245204	1.10592	0.1804
CNAG_12068	29	28	33	44	51	38	0.37956	0.374319	0.336917	0.922129	1.29623	0.42072
CNAG_00541	988	1085	1065	1090	1670	1235	0.192281	0.142898	0.161162	1.96329	1.10412	0.716064
CNAG_00542	1017	1257	1026	5112	9376	5952	5.57657e-107	2.40673	2.691e-108	488.731	5.30272	106.254
CNAG_00543	6437	7060	6561	12605	21644	14084	5.69489e-37	1.04913	8.52612e-38	165.14	2.06928	36.2445
CNAG_00544	1041	1114	835	1366	1988	1433	5.97565e-06	0.483257	3.17563e-06	21.7074	1.3979	5.22361
CNAG_00545	9415	8698	8288	5537	8742	6048	2.63184e-16	-0.585036	7.94567e-17	69.423	0.666633	15.5797
CNAG_00546	22113	15931	17181	26529	40424	29654	3.19225e-08	0.605321	1.45872e-08	32.1075	1.52132	7.4959
CNAG_00547	31641	25756	26966	97645	163026	111073	1.64187e-98	1.92572	8.69491e-100	449.627	3.79926	97.7847
CNAG_07955	3358	2757	2673	9306	15688	11086	1.17338e-81	1.82702	8.01421e-83	371.692	3.54804	80.9306
CNAG_00549	731	808	775	4376	6740	5296	1.16277e-151	2.62443	3.30903e-153	695.199	6.16641	150.935
CNAG_00550	1791	1426	1387	2502	3536	2412	2.5429e-10	0.67802	1.02792e-10	41.7676	1.59994	9.59467
CNAG_00551	17002	15394	14732	13238	20742	14948	0.0436347	-0.150932	0.033517	4.51918	0.900668	1.36017
CNAG_12069	288	236	287	561	729	596	3.75032e-11	1.02741	1.4501e-11	45.6004	2.03836	10.4259
CNAG_07367	21	18	41	11848	14184	10138	1.20191e-69	8.61913	9.68128e-71	316.212	393.204	68.9201
CNAG_12070	128	104	128	439	762	600	7.37709e-33	2.11144	1.25964e-33	146.06	4.32121	32.1321
CNAG_12071	27	11	12	116	159	109	1.73733e-13	2.74897	5.93513e-14	56.3927	6.72239	12.7601
CNAG_07368	9540	9319	9097	7240	13224	8789	0.0802186	-0.157523	0.063494	3.44368	0.896563	1.09572
CNAG_12072	1399	1411	1427	1109	2063	1500	0.523208	-0.0787804	0.479575	0.49983	0.946858	0.281326
CNAG_00554	5921	5707	5477	4289	8008	5041	0.0262792	-0.207234	0.019646	5.44308	0.866196	1.58039
CNAG_00555	2676	2554	2549	1544	2754	1924	1.68705e-08	-0.540072	7.53557e-09	33.3914	0.687737	7.77287
CNAG_00556	15587	13430	13137	11473	17383	11779	0.00144633	-0.258222	0.000941495	10.9392	0.836118	2.83973
CNAG_00557	4716	4439	4291	3328	4707	3437	5.39795e-08	-0.426529	2.50128e-08	31.0604	0.74405	7.26777
CNAG_00558	13001	11268	11435	12317	18500	12570	0.376621	0.0755921	0.333796	0.934115	1.05379	0.424095
CNAG_12074	90	185	60	434	571	407	5.30667e-11	1.89839	2.06436e-11	44.9087	3.72798	10.2752
CNAG_00559	10886	13171	9609	35783	61186	41401	2.35849e-74	1.82725	1.76551e-75	337.97	3.54861	73.6274
CNAG_00560	14741	16369	13795	9694	18414	12295	0.000105227	-0.375888	6.19619e-05	16.0417	0.770631	3.97787
CNAG_00561	6275	6466	5235	4172	7379	5011	0.000222365	-0.332859	0.000135064	14.5698	0.793962	3.65293
CNAG_00562	5002	4934	4476	3059	4628	3596	2.89798e-12	-0.551581	1.05671e-12	50.7359	0.682272	11.5379
CNAG_00563	3216	3803	2914	2593	4667	2928	0.0869462	-0.184044	0.0691202	3.30379	0.880232	1.06075
CNAG_00564	9685	9637	8599	5156	8207	4861	1.59978e-22	-0.830984	3.74707e-23	98.2183	0.562146	21.7959
CNAG_00565	39089	32197	33047	19198	34765	24968	7.96941e-10	-0.619308	3.31122e-10	39.4819	0.650983	9.09857
CNAG_00566	5301	5246	4943	4362	7459	4960	0.215471	-0.101242	0.181719	1.78351	0.93223	0.666611
CNAG_00567	3108	3525	3091	3061	5348	3524	0.431828	0.0765526	0.388175	0.74465	1.0545	0.364689
CNAG_00568	892	1007	938	5016	8617	6389	1.46898e-141	2.60646	4.67123e-143	648.527	6.09006	140.833
CNAG_00569	5808	6121	5167	7361	11228	7452	9.42208e-08	0.401339	4.45223e-08	29.9417	1.32073	7.02585
CNAG_00570	16543	16274	15461	9974	16127	10994	1.982e-18	-0.591554	5.46632e-19	79.2523	0.663628	17.7029
CNAG_00571	3089	2778	2637	2488	4309	2756	0.604299	-0.0505089	0.562054	0.336161	0.965596	0.218748
CNAG_12075	65	27	37	50	61	47	0.807369	0.110653	0.778964	0.0787752	1.07972	0.0929278
CNAG_00572	9937	8979	8805	6797	10806	7549	3.23624e-06	-0.34869	1.6914e-06	22.9171	0.785297	5.48996
CNAG_12077	29	17	21	44	35	29	0.296799	0.536714	0.257175	1.2839	1.45066	0.527537
CNAG_00573	8060	7479	6929	6115	9371	6300	0.000685865	-0.250677	0.000434076	12.3795	0.840502	3.16376
CNAG_00574	5548	5231	5135	6149	9622	6587	0.000119411	0.28167	7.07274e-05	15.7913	1.2156	3.92296
CNAG_00575	14263	15953	14054	10395	19946	15116	0.117173	-0.17989	0.0949478	2.78842	0.88277	0.931171
CNAG_00576	8665	7596	7160	4308	6529	4502	1.95609e-24	-0.81428	4.2912e-25	107.073	0.568692	23.7086
CNAG_00577	1773	1883	1677	2654	3931	2497	5.14635e-10	0.561061	2.11279e-10	40.3595	1.47535	9.2885
CNAG_07369	126	185	112	407	636	490	1.16316e-18	1.6605	3.17487e-19	80.3259	3.16125	17.9344
CNAG_00580	7373	7332	6330	6087	8784	6497	0.0216603	-0.173259	0.016008	5.80199	0.886837	1.66434
CNAG_00581	68763	57763	61475	83422	157998	102115	1.67102e-10	0.64193	6.68654e-11	42.6086	1.56042	9.77702
CNAG_00582	5675	6107	5015	4849	7403	5208	0.0648164	-0.146687	0.0506935	3.81837	0.903322	1.18831
CNAG_00583	33094	30425	29220	19079	30247	20802	5.84293e-19	-0.611894	1.57677e-19	81.709	0.654337	18.2334
CNAG_00584	37579	42422	34969	28832	48265	34460	0.00239875	-0.253206	0.00159798	9.96208	0.83903	2.62002
CNAG_00585	1053	1318	1043	890	862	818	0.000500537	-0.565993	0.00031313	12.9902	0.67549	3.30056
CNAG_00586	74843	88850	71169	8093	13382	8328	4.07831e-244	-3.1941	4.84431e-246	1122.24	0.109265	243.39
CNAG_00587	18784	12292	12206	3360	3485	2876	1.5187e-17	-2.31523	4.37834e-18	75.143	0.200931	16.8185
CNAG_00588	211648	209665	202750	625744	1081890	605122	6.31924e-72	1.66174	4.93373e-73	326.738	3.16397	71.1993
CNAG_12078	1328	1673	1504	2324	3492	2713	7.55564e-11	0.719889	2.96729e-11	44.1984	1.64705	10.1217
CNAG_00589	5382	5367	5153	3148	5135	3842	2.40313e-13	-0.598826	8.26615e-14	55.7413	0.660291	12.6192
CNAG_00590	5924	5456	5110	3511	5321	3842	7.50398e-15	-0.58178	2.41648e-15	62.6924	0.668139	14.1247
CNAG_00591	191	274	186	708	852	612	6.10033e-19	1.55616	1.64698e-19	81.6229	2.9407	18.2146
CNAG_12079	433	476	439	653	854	755	3.61453e-05	0.562197	2.05498e-05	18.1376	1.47652	4.44195
CNAG_00592	1668	1644	1490	1850	3481	2407	6.33871e-06	0.467971	3.37641e-06	21.5898	1.38316	5.198
CNAG_00593	3287	2893	2852	2784	4405	3064	0.790027	-0.024944	0.75992	0.093383	0.982859	0.102358
CNAG_00594	11211	9258	9292	12354	17865	12406	0.00036878	0.317985	0.000227966	13.5853	1.24659	3.43323
CNAG_00595	2277	2492	2249	1821	3300	2290	0.17349	-0.140135	0.144339	2.13108	0.907434	0.760726
CNAG_00596	1495	1254	1195	1437	2182	1659	0.0360293	0.221474	0.0273808	4.86664	1.16592	1.44334
CNAG_12080	88	106	119	371	437	359	5.89884e-17	1.71359	1.74367e-17	72.4152	3.27976	16.2292
CNAG_00597	281	313	236	4639	4949	4463	6.45965e-151	3.91977	1.85429e-152	691.757	15.1345	150.19
CNAG_12081	23	22	12	134	169	146	1.17042e-17	2.80211	3.35688e-18	75.6675	6.97458	16.9317
CNAG_00598	247	188	153	5229	8647	6321	2.26559e-295	4.89815	1.96228e-297	1358.72	29.8188	294.645
CNAG_00599	4444	3918	3668	5095	7874	5711	1.12806e-07	0.432243	5.36811e-08	29.5791	1.34933	6.94767
CNAG_00600	10227	8819	8582	5609	8140	5917	3.83323e-17	-0.688733	1.1236e-17	73.2825	0.620399	16.4164
CNAG_00601	492	402	381	1206	1362	1079	1.69284e-20	1.34241	4.34208e-21	88.8118	2.53575	19.7714
CNAG_12082	220	271	202	608	714	530	5.35133e-14	1.2382	1.78179e-14	58.7594	2.35905	13.2715
CNAG_00602	5072	4837	4304	2981	4706	3488	3.04254e-12	-0.549852	1.11099e-12	50.6376	0.68309	11.5168
CNAG_00603	3146	4083	3180	6250	7205	5765	1.23233e-08	0.710008	5.46329e-09	34.017	1.63581	7.90927
CNAG_00604	4462	4406	4089	3364	5101	3666	3.75765e-05	-0.298167	2.13919e-05	18.0612	0.813285	4.42508
CNAG_00605	8025	8916	8246	3300	5922	4057	2.03138e-35	-1.14356	3.21974e-36	157.921	0.452641	34.6922
CNAG_12083	1898	2180	1610	12101	21758	14560	3.86647e-162	2.87332	9.75947e-164	743.626	7.32752	161.413
CNAG_00606	4749	4559	4429	4982	8166	5111	0.0181484	0.193559	0.0132853	6.13072	1.14358	1.74116
CNAG_00607	2418	2670	2215	4211	4712	3977	3.04739e-08	0.650758	1.38908e-08	32.2025	1.56999	7.51607
CNAG_00608	3135	3720	3000	1538	2255	1712	3.7128e-27	-1.03692	7.40997e-28	119.686	0.487366	26.4303
CNAG_00609	5659	6002	5354	3337	4565	3997	3.22243e-13	-0.701556	1.11521e-13	55.1527	0.614909	12.4918
CNAG_07370	350	380	334	331	513	407	0.834218	0.0334158	0.80862	0.0586643	1.02343	0.0787204
CNAG_07956	7464	6722	6236	5200	8082	5618	3.58285e-05	-0.316983	2.0348e-05	18.1564	0.802747	4.44577
CNAG_07957	3870	3826	3370	3080	3976	2926	0.000245118	-0.336733	0.000149491	14.3786	0.791832	3.61062
CNAG_00612	3389	3167	3181	2914	4265	2971	0.0888762	-0.143329	0.0707974	3.26443	0.905428	1.05121
CNAG_00613	1684	1974	1600	1250	1877	1501	0.000329733	-0.380149	0.000202891	13.8041	0.768358	3.48184
CNAG_00615	1173	1105	1088	725	1108	932	2.48415e-05	-0.480925	1.39176e-05	18.8804	0.716518	4.60482
CNAG_07372	7390	6548	6540	4474	7180	4999	1.56209e-10	-0.507748	6.24466e-11	42.7423	0.703319	9.80629
CNAG_00619	2187	1970	2202	2155	3294	1984	0.940442	0.00916097	0.930667	0.00756996	1.00637	0.0266682
CNAG_07373	99969	82707	83224	16584	22924	19054	6.87178e-128	-2.37083	2.58478e-129	585.34	0.193335	127.163
CNAG_07374	1574	1852	1486	2252	2675	2341	0.00123502	0.39153	0.000798594	11.2445	1.31178	2.90832
CNAG_00622	11604	11562	10684	5319	8062	5572	2.69773e-55	-1.04172	2.7705e-56	249.871	0.485747	54.569
CNAG_00623	4635	4231	4348	4947	8735	5992	8.5947e-05	0.355329	5.02049e-05	16.4404	1.27928	4.06577
CNAG_12084	54	46	24	72	123	61	0.0239162	0.829874	0.0177818	5.61752	1.77753	1.62131
CNAG_00624	5576	6407	5410	4623	8177	5290	0.081918	-0.163372	0.0649303	3.40675	0.892936	1.08662
CNAG_00625	17092	16536	15540	11932	19061	13106	3.40132e-08	-0.366435	1.55757e-08	31.9801	0.775697	7.46835
CNAG_00626	33994	37238	32665	21234	36870	23390	1.05093e-12	-0.570759	3.74756e-13	52.7712	0.673263	11.9784
CNAG_00627	837	923	846	2282	3304	2304	2.07136e-50	1.39613	2.35534e-51	227.264	2.63194	49.6837
CNAG_00628	1579	1660	1424	3033	4652	3124	4.07406e-35	1.0068	6.50781e-36	156.523	2.00945	34.39
CNAG_07375	12468	11930	11555	11059	17989	11622	0.64293	-0.036961	0.602385	0.271414	0.974706	0.191836
CNAG_07376	6099	6060	5654	4517	6370	4408	4.86215e-08	-0.419311	2.24518e-08	31.27	0.747782	7.31317
CNAG_12085	0	4	3	15	13	22	0.00662408	2.69504	0.00462751	8.01955	6.47572	2.17887
CNAG_07377	23395	18977	20330	21059	34199	24937	0.130393	0.146344	0.106547	2.6047	1.10676	0.884745
CNAG_00632	12221	10842	10120	7592	11526	8143	1.96798e-10	-0.486121	7.91626e-11	42.2784	0.713942	9.70598
CNAG_00633	7906	6927	6866	5655	9228	6486	0.00501669	-0.232006	0.00346054	8.5472	0.85145	2.29958
CNAG_00634	9733	9105	8409	8916	13612	9148	0.887937	0.0113242	0.870469	0.0265896	1.00788	0.0516176
CNAG_00635	25530	22684	22663	22814	38102	26373	0.293729	0.0873678	0.254187	1.30014	1.06243	0.532054
CNAG_00636	4630	4034	3793	3146	4150	3015	1.17949e-06	-0.462857	5.97918e-07	24.9189	0.725548	5.92831
CNAG_00637	3267	2690	3058	28741	46839	30246	9.16571e-235	3.33597	1.17945e-236	1079.05	10.0978	234.038
CNAG_00638	4793	5553	4739	8092	14994	9112	7.34442e-19	0.866041	1.98832e-19	81.2506	1.82265	18.134
CNAG_00639	3828	4344	3363	3891	6275	4253	0.224063	0.114126	0.189547	1.72113	1.08232	0.649629
CNAG_00640	153638	153436	135621	22282	33123	26210	3.53457e-252	-2.63472	4.06724e-254	1159.4	0.161016	251.452
CNAG_00641	13754	13467	12541	11538	19064	12576	0.192582	-0.0953092	0.161462	1.96048	0.936072	0.715384
CNAG_07958	739	925	673	558	830	552	0.000368516	-0.470804	0.000227758	13.587	0.721563	3.43354
CNAG_00642	6377	5351	5283	7733	11142	8133	6.58875e-08	0.469482	3.07182e-08	30.6616	1.38461	7.1812
CNAG_12086	95	100	105	200	243	176	0.000104946	0.854315	6.17836e-05	16.0472	1.8079	3.97903
CNAG_00643	2698	2732	2366	4448	5374	3961	6.86927e-10	0.640104	2.84052e-10	39.7813	1.55844	9.16309
CNAG_00644	7233	6582	6539	5250	8398	5915	0.000577065	-0.266077	0.000363004	12.7136	0.831577	3.23878
CNAG_00645	3659	3201	3033	2377	4012	2725	0.000229982	-0.331083	0.000139947	14.5029	0.79494	3.63831
CNAG_07959	4091	3769	3549	5133	7990	5478	2.10393e-11	0.498387	8.01534e-12	46.762	1.41263	10.677
CNAG_00647	3894	4051	3708	6768	9041	6061	3.77882e-15	0.711928	1.19649e-15	64.077	1.63799	14.4226
CNAG_00648	6634	7480	6190	9185	15203	9129	1.67843e-08	0.505168	7.49085e-09	33.403	1.41929	7.7751
CNAG_00649	28884	26809	25818	8545	13879	10137	7.20277e-93	-1.53149	4.10849e-94	423.555	0.345921	92.1425
CNAG_00650	7728	7454	7378	5337	8514	5662	1.35763e-08	-0.421721	6.03559e-09	33.8232	0.746534	7.86722
CNAG_00651	2811	2440	2702	18509	32139	20604	2.25031e-195	2.94052	4.03731e-197	897.174	7.67686	194.648
CNAG_00652	8541	7268	6777	6843	10149	6957	0.196315	-0.116902	0.164762	1.92997	0.922166	0.707045
CNAG_00653	4965	3267	3455	2628	2766	2470	3.47637e-06	-0.732885	1.82034e-06	22.7759	0.601699	5.45887
CNAG_00654	1262	1507	1221	1714	2132	1668	0.0154599	0.28373	0.0112286	6.42878	1.21734	1.81079
CNAG_00655	52805	57171	46437	8574	13613	11629	1.26344e-118	-2.40446	5.42459e-120	542.487	0.18888	117.898
CNAG_00656	97877	98255	87895	17840	25830	21160	3.04171e-178	-2.32326	6.66151e-180	817.977	0.199816	177.517
CNAG_00658	3144	2856	2845	2244	3654	2496	0.000682462	-0.287139	0.000431753	12.3895	0.819525	3.16592
CNAG_00659	903	973	850	957	1322	913	0.801199	0.0298466	0.772054	0.0839199	1.0209	0.0962594
CNAG_00660	2213	1826	1810	1964	3203	2150	0.27909	0.111972	0.240449	1.37796	1.0807	0.554255
CNAG_00661	2514	1946	1998	1705	2568	1853	0.0110335	-0.277569	0.0078772	7.06118	0.82498	1.95729
CNAG_00662	7317	7167	6762	8246	14560	9780	7.85874e-07	0.398255	3.94104e-07	25.723	1.31791	6.10465
CNAG_00663	11595	11957	10873	12165	17522	11830	0.383474	0.0682446	0.340782	0.907488	1.04844	0.416265
CNAG_00664	253	276	232	243	309	256	0.588324	-0.0985281	0.545667	0.365138	0.933985	0.230383
CNAG_00665	14685	12839	13131	8443	14091	9483	8.66614e-12	-0.559477	3.2372e-12	48.5394	0.678548	11.0622
CNAG_00666	15839	14318	13840	12436	19458	13830	0.043195	-0.150327	0.0331418	4.53844	0.901046	1.36457
CNAG_00667	4729	4880	4400	2640	3425	2452	7.02252e-24	-0.908924	1.57359e-24	104.498	0.532582	23.1535
CNAG_00668	37436	34819	32634	53359	96497	67895	4.23521e-22	0.836567	1.01295e-22	96.2492	1.7858	21.3731
CNAG_00669	2507	2679	2445	2058	3559	2661	0.358834	-0.093946	0.316077	1.00511	0.936957	0.445107
CNAG_00670	2058	1941	1911	1318	1244	1174	4.71219e-08	-0.817639	2.17419e-08	31.3324	0.56737	7.32678
CNAG_00671	7903	7672	7120	5162	9117	5561	7.08359e-07	-0.417226	3.54179e-07	25.9292	0.748863	6.14975
CNAG_00672	62874	83843	66669	12488	19775	15767	2.26385e-94	-2.35219	1.2633e-95	430.503	0.195848	93.6452
CNAG_00673	6956	7376	6204	5512	8641	6197	0.00400047	-0.217181	0.00273182	8.97845	0.860245	2.39789
CNAG_00674	10894	9592	9771	10132	11338	8625	0.126849	-0.183925	0.103385	2.65254	0.880305	0.896713
CNAG_00675	3362	3595	3305	3687	5416	3759	0.134881	0.122599	0.110498	2.54708	1.08869	0.870049
CNAG_00676	3237	3836	3002	2697	5494	3191	0.647298	-0.0593318	0.607252	0.264195	0.959708	0.188896
CNAG_12087	2151	1765	1818	1440	1801	1419	2.40953e-05	-0.483626	1.34787e-05	18.9415	0.715178	4.61807
CNAG_00677	2360	1950	1862	831	760	877	6.77286e-18	-1.4665	1.91906e-18	76.7717	0.361858	17.1692
CNAG_00678	12888	12500	11916	23833	39845	26683	3.12992e-51	1.06139	3.51255e-52	231.053	2.08694	50.5045
CNAG_00679	1195	1398	1237	427164	934740	547764	0	8.71737	0	2831.66	420.911
CNAG_00680	1355	1192	1079	5869	7959	6287	2.00247e-123	2.28436	7.97815e-125	564.701	4.87148	122.698
CNAG_00681	1732	1205	1167	1078	1239	1027	0.00261321	-0.466456	0.00174634	9.79871	0.72374	2.58283
CNAG_12088	6	11	12	14	20	17	0.389816	0.612651	0.347082	0.884097	1.52907	0.40914
CNAG_12089	11	18	6	13	17	15	0.802457	0.19067	0.773365	0.0829301	1.14129	0.0955783
CNAG_12090	5	17	5	15	14	20	0.367081	0.725867	0.324291	0.971562	1.65389	0.435238
CNAG_00682	21580	19685	19516	14426	24492	16720	1.17536e-05	-0.342856	6.39165e-06	20.3672	0.788479	4.92983
CNAG_00683	8159	7865	7252	5003	8089	5464	1.94979e-14	-0.537549	6.37627e-15	60.7819	0.688941	13.71
CNAG_00684	8227	8574	8024	4351	8215	6073	8.97906e-10	-0.632411	3.74072e-10	39.2437	0.645097	9.04677
CNAG_00685	7293	6790	6399	6382	10976	7140	0.638703	0.0407131	0.597608	0.278618	1.02862	0.194701
CNAG_00686	44482	40348	40282	65704	124984	77816	6.62414e-21	0.872069	1.66956e-21	90.7028	1.83029	20.1789
CNAG_00687	2222	1958	1680	1367	1513	1282	3.79354e-07	-0.6615	1.86532e-07	27.1679	0.63222	6.42096
CNAG_00688	2992	3858	3075	3184	5161	3392	0.800152	0.0296475	0.770748	0.0849123	1.02076	0.0968276
CNAG_00689	4739	5571	4866	11917	22590	13672	9.0857e-45	1.43577	1.14442e-45	201.197	2.70527	44.0416
CNAG_00690	6462	7449	6147	3854	5716	4239	1.82437e-18	-0.737352	5.02255e-19	79.4196	0.599839	17.7389
CNAG_00691	8892	8706	7994	15509	25333	15215	6.4164e-30	0.913442	1.18769e-30	132.458	1.88353	29.1927
CNAG_00692	2715	2506	2436	1929	3470	2001	0.00674014	-0.27686	0.00471276	7.98649	0.825386	2.17133
CNAG_12091	162	186	175	195	299	206	0.26592	0.212659	0.228082	1.45278	1.15882	0.575249
CNAG_00693	7805	6980	7209	3879	6330	4477	6.85685e-22	-0.793696	1.65779e-22	95.274	0.576865	21.1639
CNAG_00694	15486	14708	13503	11048	17269	11679	7.85875e-07	-0.335296	3.94202e-07	25.7225	0.792621	6.10465
CNAG_00695	3968	3800	3399	3650	6211	3998	0.266891	0.0954984	0.228981	1.44718	1.06843	0.573666
CNAG_00696	18161	18586	17021	27186	51951	34554	1.21148e-20	0.854821	3.0909e-21	89.4842	1.80853	19.9167
CNAG_00697	7693	6806	6591	4657	6184	4711	8.79654e-13	-0.628853	3.12156e-13	53.1302	0.64669	12.0557
CNAG_00698	5913	5640	5075	9440	14239	9286	2.82995e-25	0.781288	6.00865e-26	110.97	1.71866	24.5482
CNAG_00699	1553	1035	1171	1020	1614	1258	0.314776	-0.151162	0.274504	1.1941	0.900525	0.501999
CNAG_12092	1715	2059	1527	2442	3656	2699	2.2155e-07	0.533232	1.07431e-07	28.2352	1.44717	6.65453
CNAG_00700	20940	19662	18516	11392	18385	13966	2.45423e-16	-0.639138	7.40034e-17	69.5632	0.642096	15.6101
CNAG_00701	7622	7015	6616	2421	2453	2027	4.35395e-42	-1.78687	5.83436e-43	188.792	0.289801	41.3611
CNAG_12093	978	1267	873	2602	3202	2894	7.76092e-22	1.30821	1.87925e-22	95.0257	2.47635	21.1101
CNAG_07380	11	7	12	39	67	65	2.92653e-06	2.30933	1.52446e-06	23.1169	4.95654	5.53365
CNAG_00702	4550	4384	4228	6321	8453	6316	3.42805e-09	0.488221	1.47013e-09	36.5735	1.40271	8.46495
CNAG_00703	39302	43597	37652	7943	11820	8966	2.31223e-185	-2.26762	4.54893e-187	850.937	0.207672	184.636
CNAG_00704	8895	8559	8254	7591	10829	7810	0.0222128	-0.169781	0.0164356	5.75566	0.888978	1.6534
CNAG_00705	8938	9736	8296	6652	11474	7627	0.000533499	-0.28281	0.000334674	12.8656	0.821988	3.27287
CNAG_00706	1758	1777	1749	2547	2897	2581	0.000354289	0.429835	0.000218482	13.6651	1.34708	3.45064
CNAG_00707	3939	4110	3597	3617	5056	3988	0.420943	-0.0710579	0.377609	0.778473	0.95194	0.375777
CNAG_00708	4632	4887	4250	5274	7787	5304	0.00529652	0.212777	0.00366536	8.44258	1.15892	2.27601
CNAG_00709	1298	1129	1044	1510	2784	2182	2.497e-08	0.689191	1.12986e-08	32.6039	1.61238	7.60258
CNAG_00710	2314	2222	2079	5894	10931	7163	2.34602e-70	1.63514	1.86938e-71	319.491	3.10617	69.6297
CNAG_00711	5523	7227	6240	14613	29408	17694	7.35205e-33	1.46324	1.25445e-33	146.068	2.75726	32.1336
CNAG_00712	3269	3398	3123	3604	4540	3188	0.848835	0.0213365	0.825203	0.0487781	1.0149	0.071177
CNAG_00713	9543	8619	8615	5732	10130	6772	7.37713e-08	-0.461964	3.45489e-08	30.4336	0.725997	7.13211
CNAG_00714	1458	1501	1209	713	1048	742	2.64107e-20	-0.934486	6.81345e-21	87.9206	0.523229	19.5782
CNAG_00715	3576	4291	3590	2456	3980	2770	1.6611e-08	-0.525205	7.41142e-09	33.4237	0.69486	7.77961
CNAG_00716	53346	45067	48415	28798	57593	39941	9.12013e-05	-0.444893	5.33757e-05	16.3243	0.734639	4.04
CNAG_00717	5200	4565	4717	6915	11751	6936	2.10375e-10	0.598484	8.47538e-11	42.1449	1.51412	9.67701
CNAG_00718	6194	5872	5561	5428	9827	6167	0.539343	0.0573397	0.495699	0.464133	1.04055	0.268135
CNAG_00719	6167	5330	4921	4462	6739	4593	0.0027795	-0.259087	0.00186401	9.67886	0.835617	2.55603
CNAG_00720	3838	3302	3412	2876	4336	3029	0.0051035	-0.248089	0.00352484	8.51369	0.842011	2.29213
CNAG_00721	13342	11829	11387	7885	12028	8640	1.1218e-13	-0.559464	3.79348e-14	57.2729	0.678554	12.9501
CNAG_00722	4343	4796	3794	2891	4434	3138	2.31603e-09	-0.507721	9.83781e-10	37.3568	0.703333	8.63526
CNAG_00723	889	935	845	1312	2157	1472	8.11527e-13	0.67687	2.8778e-13	53.2899	1.59867	12.0907
CNAG_07381	2542	2448	2194	2108	2488	1968	0.00505563	-0.308232	0.00348802	8.5328	0.807631	2.29622
CNAG_07382	9183	8687	8058	6420	8534	6709	6.78747e-08	-0.447039	3.16866e-08	30.6014	0.733547	7.16829
CNAG_12094	342	497	235	507	632	441	0.0829917	0.379565	0.0658429	3.38373	1.30095	1.08097
CNAG_00726	15	21	18	94	104	115	2.27082e-10	2.37016	9.16252e-11	41.9925	5.16998	9.64382
CNAG_12095	440	489	415	541	860	637	0.00149703	0.39622	0.000976349	10.8719	1.31606	2.82477
CNAG_00727	14494	13866	12749	6765	12410	7433	2.98667e-22	-0.854563	7.11744e-23	96.9479	0.553033	21.5248
CNAG_12096	62	55	39	51	114	119	0.0679138	0.666396	0.0532925	3.73472	1.5871	1.16804
CNAG_00728	2918	3085	2855	5096	9692	5532	2.31619e-21	0.963698	5.70879e-22	92.8264	1.9503	20.6352
CNAG_12097	181	268	205	353	526	407	1.26587e-05	0.776973	6.91044e-06	20.2179	1.71353	4.89761
CNAG_00730	32325	26283	28216	12355	20285	15539	5.36627e-27	-1.05659	1.07631e-27	118.946	0.480769	26.2703
CNAG_00732	15313	15492	14038	13606	18466	13974	0.0482973	-0.153168	0.0372658	4.33822	0.899273	1.31608
CNAG_12098	78	120	95	45	67	59	0.0014356	-0.972367	0.000934333	10.9534	0.509669	2.84297
CNAG_12099	32	43	34	93	92	68	0.0029963	1.0438	0.00201755	9.5335	2.06165	2.52342
CNAG_12100	197	176	158	290	468	334	3.18343e-07	0.834257	1.55627e-07	27.5182	1.78294	6.4971
CNAG_00733	3007	3011	2709	2298	3229	2553	0.000385544	-0.303484	0.000238902	13.4973	0.810293	3.41393
CNAG_00734	2298	2204	1994	2228	3304	2301	0.429845	0.068111	0.386286	0.7506	1.04834	0.366688
CNAG_00735	321	406	304	8726	15487	9456	0	4.80701	0	1596.71	27.9933
CNAG_00736	7361	7412	6550	3781	6244	4160	5.035e-28	-0.800357	9.77471e-29	123.705	0.574207	27.298
CNAG_00737	5235	5386	4977	4858	8936	5820	0.252425	0.106862	0.215508	1.53403	1.07688	0.597867
CNAG_12101	321	421	382	164	268	186	5.19925e-10	-1.07555	2.13515e-10	40.3389	0.474491	9.28406
CNAG_10017	13	2	4	148	264	247	1.56755e-33	4.92053	2.62811e-34	149.173	30.285	32.8048
CNAG_00738	488	465	457	569	725	672	0.0386266	0.29896	0.0294455	4.74138	1.23026	1.41311
CNAG_00739	9223	10521	8614	5966	10284	6863	3.80141e-09	-0.51052	1.63307e-09	36.3687	0.701969	8.42006
CNAG_00740	15328	13276	13243	10452	15707	10875	1.53063e-06	-0.380471	7.81792e-07	24.4022	0.768187	5.81513
CNAG_00741	29256	23130	24058	8665	13980	9606	7.74877e-54	-1.45502	8.21665e-55	243.119	0.36475	53.1108
CNAG_00742	9048	8411	7907	5415	8155	5927	3.98033e-16	-0.581098	1.20956e-16	68.5943	0.668455	15.4001
CNAG_00743	8845	8501	7790	4208	5111	4117	1.44933e-29	-1.08321	2.70786e-30	130.822	0.471978	28.8388
CNAG_00744	5615	5588	5482	5559	7880	5775	0.953776	0.00505384	0.946341	0.00452963	1.00351	0.0205538
CNAG_12102	274	350	281	369	501	467	0.0273433	0.379715	0.0204889	5.36975	1.30108	1.56315
CNAG_12103	135	219	119	846	1343	917	4.78777e-43	2.51211	6.25573e-44	193.235	5.70456	42.3199
CNAG_00745	14860	13868	14297	41816	63448	45665	6.92919e-103	1.60545	3.53233e-104	469.806	3.0429	102.159
CNAG_00746	15341	14226	13539	6785	10644	7950	8.07715e-39	-0.96772	1.15631e-39	173.691	0.511314	38.0927
CNAG_00747	29354	23909	24614	23960	37955	26962	0.868879	-0.0163947	0.84856	0.0364644	0.9887	0.0610409
CNAG_00748	1310	1200	1207	1811	3129	2053	3.32633e-13	0.693347	1.15281e-13	55.0875	1.61703	12.478
CNAG_12105	46	52	43	51	62	49	0.966347	0.0152964	0.960966	0.00239522	1.01066	0.0148669
CNAG_12107	856	942	901	625	749	652	6.71118e-06	-0.594463	3.58312e-06	21.4759	0.662291	5.1732
CNAG_00750	1757	2149	1765	2253	3654	2740	0.000105916	0.40301	6.24201e-05	16.0278	1.32226	3.97504
CNAG_12108	310	385	344	718	1014	745	2.47273e-15	1.05464	7.77434e-16	64.9265	2.0772	14.6068
CNAG_00751	121	117	193	251	440	398	7.31414e-06	1.12147	3.91952e-06	21.3038	2.17569	5.13584
CNAG_12109	60	84	89	50	111	59	0.322148	-0.331931	0.281599	1.15936	0.794472	0.491945
CNAG_00752	585	598	544	438	657	377	0.00111005	-0.442468	0.000714076	11.4522	0.735875	2.95466
CNAG_00753	7328	7227	6425	6433	9130	6354	0.0803052	-0.135118	0.0635725	3.44164	0.910596	1.09526
CNAG_00754	15285	14581	13794	9162	13003	10599	6.17166e-14	-0.605841	2.05646e-14	58.4773	0.657088	13.2096
CNAG_00755	1515	1416	1218	1241	1949	1307	0.373982	-0.0901074	0.330994	0.945004	0.939453	0.427149
CNAG_00756	1759	2017	1617	1205	2119	1250	2.34439e-05	-0.459732	1.30969e-05	18.9963	0.727121	4.62997
[truncated: 7,229 more rows]

## Sheet: 02_CAC1_ko_g_vs_CAC1_ko_m_all
	CAC1_ko_g_1	CAC1_ko_g_2	CAC1_ko_g_3	CAC1_ko_m_1	CAC1_ko_m_2	CAC1_ko_m_3	padj	log2FoldChange	pvalue	stat	foldChange	log10padj
[truncated: 8,082 more rows]

[truncated: 11 more sheets: 03_CAC1_com_g_vs_CAC1_com_m_all, 04_CAC1_PP_g_vs_CAC1_PP_m_all, 05_CAC1_AC_g_vs_CAC1_AC_m_all, 06_WT_g_vs_CAC1_ko_g_all, 07_WT_g_vs_CAC1_PP_g_all, 08_WT_g_vs_CAC1_AC_g_all, 09_WT_g_vs_CAC1_com_g_all, 10_WT_m_vs_CAC1_ko_m_all, 11_WT_m_vs_CAC1_PP_m_all, 12_WT_m_vs_CAC1_AC_m_all, 13_WT_m_vs_CAC1_com_m_all]
