# Supplementary material for: The protein phosphatase 2C domain contributes to the pathobiological function of adenylyl cyclase in Cryptococcus neoformans
Source: bioRxiv preprint, doi:10.64898/2025.12.10.693573, version 1 (2025-12-11)
Supplement: Supplemental Data 2 [file 693573_file14.xlsx]

## Sheet: Index
	Supplementary Data 2. Phosphoproteomics analysis of CAC1 1. Overall: A table summarizing phosphosites with statistically significant fold changes for each gene under specific conditions. 2. Each sheet name is formatted as: Cac1_(ko/AC/PP)(m/g)(up/down) Cac1_ko indicates whole-gene knockout, cac1Δ; Cac1_AC indicates ACC-domain knockout, CAC1ACCΔ; Cac1_PP indicates PP2C-domain knockout, CAC1PP2CΔ; …

## Sheet: Ovearall
Locus_tag	site	Gene name	Function	ko_m	PP_m	AC_m	ko_G	PP_G	AC_G
ADE16	_MSS[Phospho (STY)]FGDFIALSHTVDTPTAK_	-	-	#N/A	5.19053	5.03719	#N/A	#N/A	#N/A
ADE16	_VKT[Phospho (STY)]LHPAVHGGILSR_	-	-	#N/A	#N/A	#N/A	#N/A	4.30984	#N/A
ADE2	_FGVPY[Phospho (STY)]ELTITSAHRTPER_	-	-	#N/A	6.36282	#N/A	#N/A	#N/A	#N/A
ADE2	_FGVPYELTITS[Phospho (STY)]AHRTPER_	-	-	5.61396	#N/A	#N/A	#N/A	#N/A	#N/A
ADK1	_GT[Phospho (STY)]GVWTPVDAAQSPK_	-	-	#N/A	#N/A	3.47746	#N/A	#N/A	#N/A
ADK1	_SDDNVGT[Phospho (STY)]LR_	-	-	#N/A	#N/A	6.08429	#N/A	#N/A	#N/A
ADK1	_STSTSVSNTISSVT[Phospho (STY)]SALSPSSSSKPPR_	-	-	6.24213	#N/A	#N/A	#N/A	#N/A	#N/A
AFR1	_S[Phospho (STY)]QHELHRPTTR_	-	-	#N/A	4.08199	4.23351	#N/A	#N/A	#N/A
AFR1	_LPADS[Phospho (STY)]S[Phospho (STY)]EDIVAELEPHHVSVHR_	-	-	3.64842	#N/A	4.36094	#N/A	#N/A	#N/A
AFR1	_KYS[Phospho (STY)]NLSQR_	-	-	5.56927	#N/A	5.24041	#N/A	#N/A	#N/A
AFR1	_YSNLS[Phospho (STY)]QRS[Phospho (STY)]QHELHRPTTR_	-	-	#N/A	#N/A	5.5229	#N/A	#N/A	1.05101
AFR1	_YSNLSQRSQHELHRPT[Phospho (STY)]T[Phospho (STY)]R_	-	-	5.98868	6.02682	6.42903	#N/A	#N/A	#N/A
AFR1	_KYSNLS[Phospho (STY)]QR_	-	-	6.34464	5.87545	6.56358	#N/A	#N/A	#N/A
AFR2	_ALLAQST[Phospho (STY)]HSHGSSDDVEGGK_	-	-	#N/A	5.18469	5.56998	#N/A	#N/A	#N/A
BNA1	_IADTIGVVMEMVRPGDYLDTMRWY[Phospho (STY)]C[Carbamidomethyl (C)]PSPAHANAEK_	-	-	#N/A	#N/A	#N/A	#N/A	4.97316	5.15983
CAS1	_GGIPESIPMMNQADKDIGGLTPMEDET[Phospho (STY)]LERR_	-	-	#N/A	#N/A	1.01471	#N/A	#N/A	#N/A
CDA1	_IDLS[Phospho (STY)]KVPSYNVTTGDC[Carbamidomethyl (C)]STDAAAISDGR_	-	-	-4.26482	#N/A	#N/A	#N/A	5.75873	#N/A
CDA2	_IPNDVPHGTPTGDWTGVNYS[Phospho (STY)]NSDPDC[Carbamidomethyl (C)]WWTHNK_	-	-	#N/A	4.11579	4.02745	#N/A	#N/A	#N/A
CDA2	_IPNDVPHGTPTGDWTGVNYSNSDPDC[Carbamidomethyl (C)]WWT[Phospho (STY)]HNK_	-	-	#N/A	5.86975	6.2337	#N/A	#N/A	#N/A
CHS1	_LENYMVIDGYVLNMSPYLS[Phospho (STY)]FNPTAVEGDEVDSIIR_	-	-	5.63606	#N/A	#N/A	#N/A	#N/A	#N/A
CHS3	_NQLVS[Phospho (STY)]PISSGGHTGSLPPGAAPPQY_	-	-	#N/A	#N/A	1.32685	#N/A	#N/A	#N/A
CHS3	_NQLVSPIS[Phospho (STY)]SGGHTGSLPPGAAPPQY_	-	-	#N/A	#N/A	1.38145	#N/A	#N/A	#N/A
CHS3	_NQLVSPISS[Phospho (STY)]GGHTGSLPPGAAPPQY_	-	-	#N/A	#N/A	1.38145	#N/A	#N/A	#N/A
CHS3	_NQLVSPISSGGHTGS[Phospho (STY)]LPPGAAPPQY_	-	-	1.22103	#N/A	1.62162	#N/A	#N/A	#N/A
CHS3	_SSTSLPFRDDSRHS[Phospho (STY)]IS[Phospho (STY)]DR_	-	-	#N/A	#N/A	4.6438	#N/A	#N/A	#N/A
CHS3	_NQLVSPISSGGHT[Phospho (STY)]GS[Phospho (STY)]LPPGAAPPQY_	-	-	#N/A	#N/A	5.35328	#N/A	#N/A	#N/A
CHS3	_SSSKNQLVSPISSGGHT[Phospho (STY)]GS[Phospho (STY)]LPPGAAPPQY_	-	-	1.0936	#N/A	#N/A	#N/A	#N/A	#N/A
CHS3	_QGSS[Phospho (STY)]IYGNK_	-	-	#N/A	#N/A	#N/A	#N/A	4.15882	#N/A
CHS3	_S[Phospho (STY)]STSLPFRDDSR_	-	-	#N/A	#N/A	#N/A	#N/A	4.61943	4.79954
CHS3	_SST[Phospho (STY)]SLPFRDDSR_	-	-	#N/A	#N/A	#N/A	1.25	#N/A	#N/A
CHS4	_LHQVSSDPS[Phospho (STY)]MR_	-	-	#N/A	#N/A	3.41015	#N/A	#N/A	#N/A
CHS4	_TGQSYRPHPHSIRS[Phospho (STY)]PSFHSSASELPSK_	-	-	#N/A	#N/A	4.14633	#N/A	#N/A	#N/A
CHS4	_S[Phospho (STY)]PSFHSSASELPSK_	-	-	3.73682	3.89633	4.40347	#N/A	#N/A	#N/A
CHS4	_SPSFHSSAS[Phospho (STY)]ELPSK_	-	-	3.8591	#N/A	5.65581	#N/A	#N/A	#N/A
CHS4	_SSIASGADS[Phospho (STY)]DSKYWAIYNNK_	-	-	8.62968	8.0466	8.43426	-7.33702	#N/A	-8.21745
CHS5	_TRSTYS[Phospho (STY)]HGGYAYGQPIHPMQTR_	-	-	#N/A	#N/A	4.20855	-7.39831	#N/A	-7.32459
CHS5	_YQMSQFRQSPYQSPY[Phospho (STY)]QGPYGGSTADFR_	-	-	#N/A	#N/A	6.38758	#N/A	#N/A	#N/A
CHS5	_EPGEQHAY[Phospho (STY)]EDLGHRK_	-	-	5.90174	#N/A	6.70439	#N/A	#N/A	#N/A
CHS5	_DLLASSIHKSEKDPLDT[Phospho (STY)]EPQAGETTEVYR_	-	-	6.78852	6.4427	#N/A	#N/A	#N/A	#N/A
CHS6	_SQLKEGS[Phospho (STY)]RS[Phospho (STY)]PS[Phospho (STY)]PFMDDSFVYNDAAHLYNVEPDVEK_	-	-	5.35506	5.27937	5.03736	#N/A	#N/A	#N/A
CHS6	_FYSPSHSPSPSLY[Phospho (STY)]APIQSPPAPSYDYHANPR_	-	-	#N/A	#N/A	#N/A	6.71579	#N/A	7.29241
CHS6	_FYSPSHSPSPSLYAPIQS[Phospho (STY)]PPAPSYDYHANPR_	-	-	#N/A	#N/A	#N/A	#N/A	#N/A	4.37595
CHS8	_MRPGDIYPPPQGYNAY[Phospho (STY)]GSPTR_	-	-	#N/A	#N/A	1.03454	#N/A	#N/A	#N/A
CHS8	_MRPGDIYPPPQGYNAYGS[Phospho (STY)]PTR_	-	-	#N/A	1.00375	1.06343	#N/A	#N/A	#N/A
CHS8	_MRPGDIYPPPQGY[Phospho (STY)]NAYGSPTR_	-	-	1.01196	#N/A	1.28701	#N/A	#N/A	#N/A
CHS8	_YSLPTQSLSPFNGSPAS[Phospho (STY)]APAPAPYTMGSPSHSNAR_	-	-	9.29686	8.8018	9.09202	#N/A	#N/A	#N/A
CHS8	_YSLPTQSLSPFNGSPASAPAPAPY[Phospho (STY)]TMGSPSHSNAR_	-	-	4.39917	#N/A	#N/A	5.29866	5.37361	#N/A
CHS8	_YSLPTQSLSPFNGSPASAPAPAPYTMGSPSHS[Phospho (STY)]NAR_	-	-	5.16087	#N/A	#N/A	#N/A	#N/A	#N/A
CHS8	_YSLPTQSLSPFNGSPASAPAPAPYT[Phospho (STY)]MGSPSHSNAR_	-	-	5.19465	#N/A	#N/A	#N/A	#N/A	-5.1593
CLR4	_SAASFISSSSTLGDS[Phospho (STY)]VSGLGRK_	-	-	#N/A	#N/A	-5.70137	#N/A	#N/A	3.95202
CLR4	_SRPPTPPLPAT[Phospho (STY)]QSTPVTVSR_	-	-	6.50157	6.15923	6.35825	#N/A	#N/A	#N/A
CLR4	_ATTLFHTTSSPPSPSQSTSAPT[Phospho (STY)]K_	-	-	#N/A	#N/A	6.74034	6.54486	6.84568	7.04077
CLR4	_TLSSGTGQST[Phospho (STY)]PSKFSLPTSDVASNQK_	-	-	7.14783	7.19318	7.01869	#N/A	#N/A	#N/A
CLR4	_RTPSIPQQSPSS[Phospho (STY)]R_	-	-	#N/A	6.82467	#N/A	#N/A	#N/A	#N/A
CLR4	_PTAAPSLFAS[Phospho (STY)]GVTTK_	-	-	8.48019	#N/A	#N/A	#N/A	#N/A	#N/A
CLR4	_ATT[Phospho (STY)]LFHTTSSPPSPSQSTSAPTK_	-	-	#N/A	#N/A	#N/A	#N/A	4.98221	#N/A
CLR4	_S[Phospho (STY)]INLGILR_	-	-	#N/A	#N/A	#N/A	#N/A	1.07478	#N/A
CLR4	_TLSSGTGQS[Phospho (STY)]TPSKFSLPTSDVASNQK_	-	-	#N/A	#N/A	#N/A	5.61081	#N/A	#N/A
CLR4	_VFS[Phospho (STY)]IVSR_	-	-	#N/A	#N/A	#N/A	#N/A	1.6955	#N/A
CLU1	_EGEKSEIPQEEQS[Phospho (STY)]PAASAAAAHR_	-	-	#N/A	6.09397	#N/A	#N/A	#N/A	#N/A
CNA1	_[Acetyl (Protein N-term)]AS[Phospho (STY)]PATQTANAIAAINNR_	-	-	#N/A	#N/A	2.26877	#N/A	#N/A	#N/A
CNA1	_DVQAPAMYVPT[Phospho (STY)]DDQFWSKVDK_	-	-	#N/A	#N/A	2.63053	#N/A	#N/A	5.44924
CNA1	_DVQAPAMY[Phospho (STY)]VPTDDQFWSKVDK_	-	-	#N/A	#N/A	3.10932	#N/A	#N/A	#N/A
CNA1	_T[Phospho (STY)]PIS[Phospho (STY)]S[Phospho (STY)]AIASGSPGSPGTPTSPSIGGPPLTAWRPGHGR_	-	-	#N/A	1.762	4.89797	#N/A	#N/A	#N/A
CNA1	_[Acetyl (Protein N-term)]ASPATQT[Phospho (STY)]ANAIAAINNR_	-	-	#N/A	4.82883	4.94806	#N/A	#N/A	#N/A
CNA1	_TPISSAIASGSPGSPGTPT[Phospho (STY)]S[Phospho (STY)]PSIGGPPLTAWRPGHGR_	-	-	6.60347	6.21919	7.32483	#N/A	#N/A	#N/A
CNA1	_TPISSAIASGSPGSPGT[Phospho (STY)]PTS[Phospho (STY)]PSIGGPPLTAWRPGHGR_	-	-	1.09914	1.03477	#N/A	#N/A	#N/A	#N/A
CNAG_00006	_VLSRPSVNDLPT[Phospho (STY)]IYR_	-	prohibitin-2	#N/A	#N/A	#N/A	5.91838	5.94242	5.99321
CNAG_00008	_AS[Phospho (STY)]PIDIASWHR_	-	hypothetical protein	#N/A	#N/A	2.72263	#N/A	#N/A	#N/A
CNAG_00008	_RRSGAGENTWEHIS[Phospho (STY)]PTLALLPR_	-	hypothetical protein	#N/A	#N/A	3.80186	#N/A	#N/A	#N/A
CNAG_00008	_DGQEDGLLSGLPGGT[Phospho (STY)]FRSPMQEK_	-	hypothetical protein	#N/A	#N/A	5.0692	#N/A	#N/A	#N/A
CNAG_00008	_DGQEDGLLSGLPGGTFRS[Phospho (STY)]PMQEK_	-	hypothetical protein	#N/A	#N/A	6.94375	#N/A	#N/A	#N/A
CNAG_00008	_YFT[Phospho (STY)]KASPIDIASWHR_	-	hypothetical protein	6.39167	#N/A	#N/A	#N/A	#N/A	#N/A
CNAG_00010	_LSSGYSGIPNPVGNT[Phospho (STY)]PPQTPGAFPSTPTPNLTSR_	-	cation transporter	2.13072	#N/A	#N/A	#N/A	#N/A	#N/A
CNAG_00018	_YDNPMGPMS[Phospho (STY)]GRPSTPDTTQQDAYEYSK_	FZC6	hypothetical protein	#N/A	5.95352	5.98156	#N/A	#N/A	#N/A
CNAG_00018	_YDNPMGPMSGRPS[Phospho (STY)]TPDTTQQDAYEYSK_	FZC6	hypothetical protein	#N/A	6.0746	6.07005	#N/A	#N/A	#N/A
CNAG_00018	_Y[Phospho (STY)]DNPMGPMSGRPSTPDTTQQDAYEYSK_	FZC6	hypothetical protein	6.01147	6.16516	#N/A	#N/A	#N/A	#N/A
CNAG_00021	_APFFHDSDSLAS[Phospho (STY)]PATTPGHVLGEAISHK_	-	S-adenosylmethionine decarboxylase proenzyme	#N/A	#N/A	1.39037	#N/A	#N/A	#N/A
CNAG_00021	_APFFHDSDSLASPATT[Phospho (STY)]PGHVLGEAISHK_	-	S-adenosylmethionine decarboxylase proenzyme	1.37973	1.28405	1.71683	#N/A	#N/A	#N/A
CNAG_00031	_SADLTQQMTT[Phospho (STY)]SSPTVSWDHHEPLR_	MLR1	hypothetical protein	4.99919	4.23039	4.17134	#N/A	#N/A	#N/A
CNAG_00031	_GSQPTSPPATT[Phospho (STY)]AQPATLDSDGPSPR_	MLR1	hypothetical protein	#N/A	#N/A	#N/A	4.8053	#N/A	4.95341
CNAG_00034	_S[Phospho (STY)]LVENMITGVTK_	RPL9B	large subunit ribosomal protein L9e	#N/A	#N/A	#N/A	#N/A	4.01531	#N/A
CNAG_00035	_HYVYQHSASSPY[Phospho (STY)]AHAYASR_	-	hypothetical protein	#N/A	#N/A	#N/A	#N/A	6.72695	8.69559
CNAG_00039	_EHPSGSSSLYQSPSLPSLGT[Phospho (STY)]NSPTTSPSSAR_	ZFC6	hypothetical protein	1.15703	#N/A	1.26184	#N/A	#N/A	1.48384
CNAG_00039	_EHPSGSSSLYQSPS[Phospho (STY)]LPSLGTNSPTTSPSSAR_	ZFC6	hypothetical protein	1.51367	#N/A	1.53051	1.34823	#N/A	1.44528
CNAG_00039	_ATILPTLTSPENERPPMPSASFS[Phospho (STY)]LPSIQR_	ZFC6	hypothetical protein	#N/A	#N/A	1.5502	1.86817	#N/A	2.14584
CNAG_00039	_ATILPTLTSPENERPPMPSASFSLPS[Phospho (STY)]IQR_	ZFC6	hypothetical protein	#N/A	#N/A	1.56878	1.86798	#N/A	2.14583
CNAG_00039	_EHPSGSSSLYQSPSLPSLGTNSPTTS[Phospho (STY)]PSSAR_	ZFC6	hypothetical protein	#N/A	#N/A	1.65315	1.79798	#N/A	#N/A
CNAG_00039	_EHPSGSSSLYQSPSLPSLGTNSPT[Phospho (STY)]TSPSSAR_	ZFC6	hypothetical protein	#N/A	#N/A	1.65334	1.82792	#N/A	1.99571
CNAG_00039	_ATILPTLTS[Phospho (STY)]PENERPPMPSASFSLPSIQR_	ZFC6	hypothetical protein	1.49248	1.19688	1.76997	1.89913	#N/A	2.20895
CNAG_00039	_ATILPTLT[Phospho (STY)]SPENERPPMPSASFSLPSIQR_	ZFC6	hypothetical protein	1.55579	1.25827	1.83135	1.89905	#N/A	2.21055
CNAG_00039	_EHPSGSSSLYQSPSLPSLGTNS[Phospho (STY)]PTTSPSSAR_	ZFC6	hypothetical protein	#N/A	#N/A	1.96959	1.96244	#N/A	2.08924
CNAG_00039	_AKS[Phospho (STY)]VEEEEAEEAEEKDEVPEK_	ZFC6	hypothetical protein	2.03377	#N/A	2.17346	2.14641	#N/A	2.2786
CNAG_00039	_ATILPTLTSPENERPPMPS[Phospho (STY)]ASFSLPSIQR_	ZFC6	hypothetical protein	1.89287	1.54725	2.41913	2.10486	#N/A	2.43091
CNAG_00039	_FPSFTSSTVPELS[Phospho (STY)]APGWWAPEFERSPFHAVSSR_	ZFC6	hypothetical protein	#N/A	#N/A	2.42231	5.11528	#N/A	5.8026
CNAG_00039	_NASFPSSSPHS[Phospho (STY)]SGR_	ZFC6	hypothetical protein	3.82825	2.62929	2.66279	#N/A	#N/A	#N/A
CNAG_00039	_ASEQPTHPSKPNKHPS[Phospho (STY)]PHPPPPHR_	ZFC6	hypothetical protein	3.99512	#N/A	3.48643	#N/A	#N/A	#N/A
CNAG_00039	_SSS[Phospho (STY)]TSSDC[Carbamidomethyl (C)]LRR_	ZFC6	hypothetical protein	#N/A	#N/A	4.21049	#N/A	#N/A	#N/A
CNAG_00039	_AT[Phospho (STY)]ILPTLTSPENERPPMPSASFSLPSIQR_	ZFC6	hypothetical protein	3.83708	3.46117	4.22857	2.11991	#N/A	2.67799
CNAG_00039	_FPSFTSSTVPELSAPGWWAPEFERS[Phospho (STY)]PFHAVSSR_	ZFC6	hypothetical protein	#N/A	#N/A	4.73379	4.79519	3.79574	5.42577
CNAG_00039	_RHSNTQPTT[Phospho (STY)]PDTTGQPEVR_	ZFC6	hypothetical protein	5.99864	#N/A	5.21466	6.19583	4.94553	5.9583
CNAG_00039	_EHPSGSSSLY[Phospho (STY)]QSPSLPSLGTNSPTTSPSSAR_	ZFC6	hypothetical protein	#N/A	4.70445	5.23744	#N/A	#N/A	#N/A
CNAG_00039	_EHPSGSSSLYQSPSLPS[Phospho (STY)]LGTNSPTTSPSSAR_	ZFC6	hypothetical protein	4.93497	4.51167	5.28072	#N/A	#N/A	#N/A
CNAG_00039	_GSISSTSGAM[Oxidation (M)]S[Phospho (STY)]PPITR_	ZFC6	hypothetical protein	5.46122	4.7888	5.383	#N/A	#N/A	#N/A
CNAG_00039	_LHPPISSSPS[Phospho (STY)]VATVMGR_	ZFC6	hypothetical protein	#N/A	#N/A	5.55238	#N/A	#N/A	#N/A
CNAG_00039	_ST[Phospho (STY)]PTSWSIMR_	ZFC6	hypothetical protein	#N/A	#N/A	5.62423	#N/A	#N/A	#N/A
CNAG_00039	_LHPPIS[Phospho (STY)]SSPSVATVMGR_	ZFC6	hypothetical protein	#N/A	#N/A	6.08919	#N/A	#N/A	#N/A
CNAG_00039	_S[Phospho (STY)]TPTSWSIMR_	ZFC6	hypothetical protein	#N/A	#N/A	6.38111	#N/A	#N/A	#N/A
CNAG_00039	_FPSFTSSTVPELSAPGWWAPEFERSPFHAVS[Phospho (STY)]SR_	ZFC6	hypothetical protein	#N/A	#N/A	6.58724	#N/A	#N/A	#N/A
CNAG_00039	_ATILPT[Phospho (STY)]LTSPENERPPMPSASFSLPSIQR_	ZFC6	hypothetical protein	#N/A	6.13909	6.72002	1.90772	#N/A	2.21047
CNAG_00039	_HS[Phospho (STY)]NTQPTTPDTTGQPEVR_	ZFC6	hypothetical protein	7.23387	6.53707	7.01289	1.44898	#N/A	#N/A
CNAG_00039	_RFS[Phospho (STY)]VQSNLKR_	ZFC6	hypothetical protein	#N/A	1.51446	#N/A	#N/A	#N/A	-5.68909
CNAG_00039	_GSISSTSGAMS[Phospho (STY)]PPITR_	ZFC6	hypothetical protein	1.00559	#N/A	#N/A	#N/A	#N/A	1.38323
CNAG_00039	_ATILPTLTS[Phospho (STY)]PENERPPM[Oxidation (M)]PSASFSLPSIQR_	ZFC6	hypothetical protein	#N/A	#N/A	#N/A	7.97373	6.71459	7.84902
CNAG_00039	_HSNTQPT[Phospho (STY)]TPDTTGQPEVR_	ZFC6	hypothetical protein	#N/A	#N/A	#N/A	1.75191	#N/A	1.73846
CNAG_00039	_HSNTQPTT[Phospho (STY)]PDTTGQPEVR_	ZFC6	hypothetical protein	#N/A	#N/A	#N/A	1.44913	#N/A	1.12979
CNAG_00039	_HSNTQPTT[Phospho (STY)]PDTTGQPEVRR_	ZFC6	hypothetical protein	#N/A	#N/A	#N/A	6.38205	#N/A	6.21471
CNAG_00039	_HSNTQPTTPDT[Phospho (STY)]TGQPEVR_	ZFC6	hypothetical protein	#N/A	#N/A	#N/A	#N/A	#N/A	1.58069
CNAG_00039	_RAS[Phospho (STY)]PSSRNPSLVGGQLSR_	ZFC6	hypothetical protein	#N/A	#N/A	#N/A	1.17985	#N/A	1.08562
CNAG_00043	_LSFSLT[Phospho (STY)]PIHVTSSR_	-	hypothetical protein, variant	#N/A	4.22435	5.021	#N/A	#N/A	#N/A
CNAG_00043	_FGPGPGSGSGIGS[Phospho (STY)]R_	-	hypothetical protein, variant	6.20241	5.88753	5.80593	#N/A	#N/A	#N/A
CNAG_00043	_LS[Phospho (STY)]FSLTPIHVTSSR_	-	hypothetical protein, variant	#N/A	#N/A	#N/A	#N/A	2.85943	3.83301
CNAG_00044	_APDMVS[Phospho (STY)]PK_	-	ribosome assembly protein 1	6.00723	6.58887	6.19162	#N/A	#N/A	#N/A
CNAG_00045	_WDPVGPSPDGVSGGVMFPGVGGS[Phospho (STY)]PLGGVGR_	-	hypothetical protein	#N/A	1.8847	1.79042	#N/A	#N/A	#N/A
CNAG_00045	_WDPVGPSPDGVS[Phospho (STY)]GGVMFPGVGGSPLGGVGR_	-	hypothetical protein	#N/A	4.04024	4.24292	1.2105	1.12164	1.18503
CNAG_00045	_WDPVGPS[Phospho (STY)]PDGVSGGVMFPGVGGSPLGGVGR_	-	hypothetical protein	#N/A	#N/A	4.41801	#N/A	#N/A	#N/A
CNAG_00050	_VLLFGAY[Phospho (STY)]PWNAVVRSPESTLPIEK_	-	hypothetical protein	#N/A	#N/A	#N/A	#N/A	4.01416	4.32806
CNAG_00051	_EAS[Phospho (STY)]PAERPAVNLVYDMAAETGNSALPIQPTVDTLNDATMK_	SNT1	putative set3c deacetylase complex subunit	#N/A	#N/A	1.16358	#N/A	#N/A	#N/A
CNAG_00051	_EASPAERPAVNLVY[Phospho (STY)]DMAAETGNSALPIQPTVDTLNDATMK_	SNT1	putative set3c deacetylase complex subunit	#N/A	#N/A	1.24534	#N/A	#N/A	#N/A
CNAG_00051	_HVSLQES[Phospho (STY)]PILAWNMAAAPEESSR_	SNT1	putative set3c deacetylase complex subunit	#N/A	1.11735	1.26595	#N/A	#N/A	#N/A
CNAG_00051	_DASMDSASPLGPS[Phospho (STY)]PLKIR_	SNT1	putative set3c deacetylase complex subunit	#N/A	#N/A	2.08245	#N/A	#N/A	#N/A
CNAG_00051	_KQTDT[Phospho (STY)]VSQLSPHSTIAER_	SNT1	putative set3c deacetylase complex subunit	#N/A	#N/A	3.25685	#N/A	#N/A	#N/A
CNAG_00051	_KQTDTVSQLS[Phospho (STY)]PHSTIAER_	SNT1	putative set3c deacetylase complex subunit	#N/A	4.1205	3.39604	#N/A	#N/A	#N/A
CNAG_00051	_T[Phospho (STY)]AVSEIDTPVLEDGEGRDEMGTEEAR_	SNT1	putative set3c deacetylase complex subunit	#N/A	5.7129	4.54609	#N/A	#N/A	#N/A
CNAG_00051	_TSGPNGVPSLNLAAAQS[Phospho (STY)]LSAQPSPTFSK_	SNT1	putative set3c deacetylase complex subunit	4.7504	3.97056	4.83412	6.42189	5.32102	5.84316
CNAG_00051	_VQVSTPIESQAQQQIDAPVQARPEVY[Phospho (STY)]NKPR_	SNT1	putative set3c deacetylase complex subunit	6.22439	6.12312	6.34143	#N/A	#N/A	#N/A
CNAG_00051	_S[Phospho (STY)]QPATYDRSPLGHGHTDPLTPHGHGR_	SNT1	putative set3c deacetylase complex subunit	7.49703	7.11921	6.76966	#N/A	#N/A	#N/A
CNAG_00051	_TSGPNGVPS[Phospho (STY)]LNLAAAQSLSAQPSPTFSK_	SNT1	putative set3c deacetylase complex subunit	#N/A	6.39935	6.78899	#N/A	#N/A	#N/A
CNAG_00051	_TSGPNGVPSLNLAAAQSLSAQPS[Phospho (STY)]PTFSK_	SNT1	putative set3c deacetylase complex subunit	7.11047	5.9226	7.02324	#N/A	#N/A	#N/A
CNAG_00051	_RPS[Phospho (STY)]PALSSWSNK_	SNT1	putative set3c deacetylase complex subunit	#N/A	#N/A	8.14663	#N/A	#N/A	#N/A
CNAG_00051	_EASPAERPAVNLVYDMAAETGNS[Phospho (STY)]ALPIQPTVDTLNDATMK_	SNT1	putative set3c deacetylase complex subunit	#N/A	#N/A	#N/A	#N/A	#N/A	1.01121
CNAG_00051	_PLLGTSGRSPSSGPS[Phospho (STY)]R_	SNT1	putative set3c deacetylase complex subunit	#N/A	#N/A	#N/A	3.70056	2.5638	#N/A
CNAG_00051	_TSGPNGVPSLNLAAAQSLS[Phospho (STY)]AQPSPTFSK_	SNT1	putative set3c deacetylase complex subunit	#N/A	#N/A	#N/A	7.40935	#N/A	6.78689
CNAG_00054	_PRSADDPIVQAEQSHYNSSMY[Phospho (STY)]NALGAAQMSFQPINR_	-	hypothetical protein	#N/A	#N/A	1.89146	#N/A	#N/A	#N/A
CNAG_00054	_PRS[Phospho (STY)]ADDPIVQAEQSHYNSSMYNALGAAQMSFQPINR_	-	hypothetical protein	#N/A	#N/A	1.91413	#N/A	#N/A	#N/A
CNAG_00054	_PRSADDPIVQAEQSHY[Phospho (STY)]NSSMYNALGAAQMSFQPINR_	-	hypothetical protein	#N/A	#N/A	2.04795	#N/A	#N/A	#N/A
CNAG_00056	_VPTALDVGSGTLGT[Phospho (STY)]PR_	-	hypothetical protein	#N/A	#N/A	1.55236	#N/A	#N/A	#N/A
CNAG_00056	_VPTALDVGSGT[Phospho (STY)]LGTPR_	-	hypothetical protein	#N/A	#N/A	1.57899	#N/A	5.55769	5.00345
CNAG_00056	_PTT[Phospho (STY)]PLRTELK_	-	hypothetical protein	3.39374	3.28913	3.08826	#N/A	#N/A	#N/A
CNAG_00056	_GLSPNFDS[Phospho (STY)]VPSPQQR_	-	hypothetical protein	6.60818	6.57871	6.41407	#N/A	#N/A	#N/A
CNAG_00056	_VPTALDVGS[Phospho (STY)]GTLGTPRR_	-	hypothetical protein	6.90669	6.01768	6.65577	#N/A	5.70909	1.94827
CNAG_00056	_RGLSPNFDS[Phospho (STY)]VPS[Phospho (STY)]PQQR_	-	hypothetical protein	10.2336	9.18789	9.8379	#N/A	#N/A	-8.09477
CNAG_00056	_VPTALDVGSGTLGT[Phospho (STY)]PRR_	-	hypothetical protein	#N/A	#N/A	#N/A	#N/A	5.06453	3.08284
CNAG_00062	_VAKDLY[Phospho (STY)]ETDEPAK_	-	26S proteasome regulatory subunit N3	#N/A	7.75902	7.19453	#N/A	#N/A	#N/A
CNAG_00065	_SWVYNVAADYAEGEAS[Phospho (STY)]AETLAIR_	-	ran-binding protein 1	#N/A	#N/A	4.16667	#N/A	#N/A	#N/A
CNAG_00066	_KAALATESGSLFAGVEAPKPS[Phospho (STY)]PK_	-	membrane protein	#N/A	#N/A	1.19923	#N/A	#N/A	#N/A
CNAG_00066	_TTLGSS[Phospho (STY)]PR_	-	membrane protein	7.38268	6.79166	5.93078	#N/A	#N/A	#N/A
CNAG_00066	_AENSESEESDDEPGPS[Phospho (STY)]RR_	-	membrane protein	3.67467	3.16706	#N/A	#N/A	#N/A	#N/A
CNAG_00070	_ASSGIYTPPTFPGPS[Phospho (STY)]GDHLHLPR_	-	hypothetical protein	7.77869	#N/A	#N/A	#N/A	#N/A	#N/A
CNAG_00072	_[Acetyl (Protein N-term)]RLS[Phospho (STY)]VS[Phospho (STY)]IS[Phospho (STY)]AALIAFTSLVSASKVVDLDNNNFDQIVGQDK_	-	protein disulfide-isomerase	#N/A	#N/A	#N/A	#N/A	1.20404	#N/A
CNAG_00073	_S[Phospho (STY)]QLFSPASQQPR_	FAR8	nuclear mRNA splicing protein	6.96817	6.78898	#N/A	#N/A	#N/A	#N/A
CNAG_00073	_KELSEES[Phospho (STY)]VQPLHTR_	FAR8	nuclear mRNA splicing protein	#N/A	7.7314	#N/A	2.89862	1.90304	2.6917
CNAG_00073	_KELS[Phospho (STY)]EESVQPLHTR_	FAR8	nuclear mRNA splicing protein	#N/A	#N/A	#N/A	2.97665	3.9895	#N/A
CNAG_00077	_AKEGAALEVAPAVIENLENAAS[Phospho (STY)]PGIER_	-	solute carrier family 26 (sodium-independent sulfate anion transporter), member 11	#N/A	#N/A	#N/A	#N/A	#N/A	1.23433
CNAG_00078	_TVQSNNGVLSLPSPDHQQS[Phospho (STY)]HGYFTQALR_	-	vacuolar protein	#N/A	#N/A	1.16686	#N/A	#N/A	#N/A
CNAG_00078	_TVQSNNGVLSLPSPDHQQSHGYFT[Phospho (STY)]QALR_	-	vacuolar protein	#N/A	1.01807	1.22909	#N/A	#N/A	#N/A
CNAG_00078	_TVQSNNGVLSLPS[Phospho (STY)]PDHQQSHGYFTQALR_	-	vacuolar protein	#N/A	1.52685	1.56431	#N/A	#N/A	#N/A
CNAG_00078	_TVQSNNGVLS[Phospho (STY)]LPSPDHQQSHGYFTQALR_	-	vacuolar protein	3.2719	3.96668	4.03428	#N/A	#N/A	#N/A
CNAG_00078	_DPNASPHVPSTFPNRPVSPNNSQHPNALS[Phospho (STY)]PNASGFSIR_	-	vacuolar protein	#N/A	#N/A	4.10873	#N/A	#N/A	#N/A
CNAG_00078	_S[Phospho (STY)]ASSIGKPASDEEESGER_	-	vacuolar protein	#N/A	#N/A	6.19448	-5.82398	#N/A	#N/A
CNAG_00078	_TVQSNNGVLSLPS[Phospho (STY)]PDHQQSHGYFTQALRR_	-	vacuolar protein	6.87409	6.32025	9.26251	#N/A	#N/A	#N/A
CNAG_00078	_TVQSNNGVLSLPSPDHQQSHGY[Phospho (STY)]FTQALR_	-	vacuolar protein	5.46354	5.85255	#N/A	-7.71067	#N/A	#N/A
CNAG_00083	_NGDKS[Phospho (STY)]PLFLPNSSLESNDTVEPSHTITSAVTSQVEAIER_	CCC1	hypothetical protein	#N/A	#N/A	1.53739	#N/A	#N/A	#N/A
CNAG_00083	_ASLTSVSAGTPS[Phospho (STY)]ES[Phospho (STY)]PAPVAGPSR_	CCC1	hypothetical protein	5.59389	5.87499	5.63242	#N/A	#N/A	#N/A
CNAG_00083	_NRPS[Phospho (STY)]LGDHEDVSEDSDVLTHATRR_	CCC1	hypothetical protein	#N/A	#N/A	5.91933	#N/A	#N/A	#N/A
CNAG_00083	_SRESQIEPNS[Phospho (STY)]PEVQLAR_	CCC1	hypothetical protein	#N/A	#N/A	6.63678	#N/A	#N/A	#N/A
CNAG_00083	_KSVITFS[Phospho (STY)]GPK_	CCC1	hypothetical protein	#N/A	6.05022	#N/A	#N/A	-6.37956	#N/A
CNAG_00083	_AGHSDDEEVQEVAKPPS[Phospho (STY)]KGK_	CCC1	hypothetical protein	2.84754	#N/A	#N/A	#N/A	#N/A	#N/A
CNAG_00083	_ASLT[Phospho (STY)]SVSAGTPSESPAPVAGPSR_	CCC1	hypothetical protein	6.13983	#N/A	#N/A	#N/A	#N/A	#N/A
CNAG_00089	_SRY[Phospho (STY)]TPEVGDLVIGR_	-	exosome complex component RRP4	#N/A	#N/A	#N/A	#N/A	#N/A	1.01848
CNAG_00089	_SRYT[Phospho (STY)]PEVGDLVIGR_	-	exosome complex component RRP4	#N/A	#N/A	#N/A	1.18801	#N/A	1.12861
CNAG_00091	_SGMGATGT[Phospho (STY)]PDR_	-	hypothetical protein	#N/A	1.86317	1.47295	#N/A	#N/A	#N/A
CNAG_00091	_VADY[Phospho (STY)]GTGSHTSSHHTGAAGTGAAAAGAGAGAAALGHHENK_	-	hypothetical protein	1.66987	#N/A	2.07345	#N/A	#N/A	#N/A
CNAG_00091	_LAGGHSTTGAYDT[Phospho (STY)]PSSS[Phospho (STY)]HGIAGR_	-	hypothetical protein	#N/A	#N/A	#N/A	#N/A	6.47927	6.05009
CNAG_00091	_TAPHS[Phospho (STY)]GTEDPNKQQSGGAAGIFATSDKDFTSNTDR_	-	hypothetical protein	#N/A	#N/A	#N/A	#N/A	1.26138	#N/A
CNAG_00091	_TAPHSGT[Phospho (STY)]EDPNKQQSGGAAGIFATSDKDFTSNTDR_	-	hypothetical protein	#N/A	#N/A	#N/A	#N/A	1.17062	#N/A
CNAG_00091	_TAPHSGTEDPNKQQSGGAAGIFAT[Phospho (STY)]SDKDFTSNTDR_	-	hypothetical protein	#N/A	#N/A	#N/A	#N/A	1.29156	#N/A
CNAG_00091	_TAPHSGTEDPNKQQSGGAAGIFATS[Phospho (STY)]DKDFTSNTDR_	-	hypothetical protein	#N/A	#N/A	#N/A	#N/A	1.16299	#N/A
CNAG_00095	_SPTPTGHQGNPT[Phospho (STY)]LK_	-	hypothetical protein	8.1828	8.18963	7.76422	#N/A	#N/A	#N/A
CNAG_00095	_LAT[Phospho (STY)]REATLLLLSIQASANSTASTDSK_	-	hypothetical protein	9.42128	8.88025	9.72614	#N/A	#N/A	#N/A
CNAG_00096	_DHVKTQAT[Phospho (STY)]LAR_	-	hypothetical protein	#N/A	#N/A	6.65741	#N/A	#N/A	#N/A
CNAG_00096	_AHLPSPAPS[Phospho (STY)]PSSS[Phospho (STY)]LILPSSSDSLSIEGEGGKR_	-	hypothetical protein	#N/A	#N/A	#N/A	7.29966	#N/A	7.04415
CNAG_00099	_[Acetyl (Protein N-term)]ADQQLS[Phospho (STY)]QGNLPVFNDDLVADR_	MCM3	minichromosome maintenance protein 3	#N/A	3.26447	#N/A	#N/A	#N/A	1.42165
CNAG_00099	_S[Phospho (STY)]VHWSPR_	MCM3	minichromosome maintenance protein 3	#N/A	5.86413	#N/A	#N/A	#N/A	#N/A
CNAG_00099	_GSSGVGLT[Phospho (STY)]AAVTTDKDTGER_	MCM3	minichromosome maintenance protein 3	#N/A	#N/A	#N/A	#N/A	#N/A	7.14256
CNAG_00100	_VMNEIQQQRS[Phospho (STY)]SETEEETYAR_	-	stress-induced-phosphoprotein 1	#N/A	-2.4144	#N/A	6.35399	#N/A	7.06693
CNAG_00100	_KQAEPAT[Phospho (STY)]EPEAEPMEVEEDEGAK_	-	stress-induced-phosphoprotein 1	#N/A	#N/A	#N/A	#N/A	#N/A	4.29412
CNAG_00100	_VMNEIQQQRSSET[Phospho (STY)]EEETYAR_	-	stress-induced-phosphoprotein 1	#N/A	#N/A	#N/A	5.5449	#N/A	6.12812
CNAG_00104	_TVPGTPGTVTGT[Phospho (STY)]ATPAESVGTDGTVDDVADGLAK_	-	elongation factor 3	#N/A	1.28372	#N/A	#N/A	#N/A	#N/A
CNAG_00104	_VALVEDAFDDPSRPGS[Phospho (STY)]R_	-	elongation factor 3	#N/A	#N/A	#N/A	#N/A	#N/A	1.25595
CNAG_00106	_S[Phospho (STY)]RPDS[Phospho (STY)]GRGTHAHTLMDLEK_	TCO5	Two-component-like sensor kinase	#N/A	#N/A	1.10113	#N/A	#N/A	#N/A
CNAG_00106	_SLVSHLTPPSHPS[Phospho (STY)]TTSESALGSSLR_	TCO5	Two-component-like sensor kinase	#N/A	3.6417	4.68005	#N/A	#N/A	#N/A
CNAG_00106	_S[Phospho (STY)]SAAAQWIQK_	TCO5	Two-component-like sensor kinase	5.58932	4.53337	5.26103	#N/A	#N/A	#N/A
CNAG_00106	_SS[Phospho (STY)]EWSEEMGK_	TCO5	Two-component-like sensor kinase	#N/A	#N/A	5.39601	5.94021	#N/A	6.97013
CNAG_00106	_SLVSHLTPPSHPST[Phospho (STY)]TSESALGSSLR_	TCO5	Two-component-like sensor kinase	#N/A	5.10502	5.76617	#N/A	#N/A	#N/A
CNAG_00106	_IVVDNNFEHFTPAVPKSDSGY[Phospho (STY)]GSGR_	TCO5	Two-component-like sensor kinase	#N/A	#N/A	5.8388	#N/A	#N/A	#N/A
CNAG_00106	_SLVSHLTPPSHPSTTSESALGS[Phospho (STY)]SLR_	TCO5	Two-component-like sensor kinase	6.42396	5.30653	6.08384	#N/A	#N/A	#N/A
CNAG_00106	_SRPDSGRGTHAHT[Phospho (STY)]LMDLEK_	TCO5	Two-component-like sensor kinase	6.34342	6.05235	6.22892	#N/A	#N/A	1.4345
CNAG_00106	_SS[Phospho (STY)]AAAQWIQK_	TCO5	Two-component-like sensor kinase	6.60445	5.32003	6.25131	#N/A	#N/A	#N/A
CNAG_00106	_SLVSHLTPPS[Phospho (STY)]HPSTTSESALGSSLR_	TCO5	Two-component-like sensor kinase	#N/A	#N/A	6.51524	#N/A	#N/A	#N/A
CNAG_00106	_LEPTPAT[Phospho (STY)]EPDDPLR_	TCO5	Two-component-like sensor kinase	6.98465	6.44375	7.07483	#N/A	#N/A	#N/A
CNAG_00106	_ERRS[Phospho (STY)]SEWSEEMGK_	TCO5	Two-component-like sensor kinase	8.09441	#N/A	7.11272	6.49349	#N/A	6.17465
CNAG_00106	_SSEWS[Phospho (STY)]EEMGK_	TCO5	Two-component-like sensor kinase	8.25044	#N/A	7.77282	#N/A	#N/A	#N/A
CNAG_00106	_SLVSHLT[Phospho (STY)]PPSHPSTTSESALGSSLR_	TCO5	Two-component-like sensor kinase	5.4188	#N/A	#N/A	8.37899	8.0124	#N/A
CNAG_00106	_GPSQTSANSERPAIGTT[Phospho (STY)]DSTMPLLPAEPR_	TCO5	Two-component-like sensor kinase	#N/A	#N/A	#N/A	1.60896	#N/A	1.55758
CNAG_00106	_GPSQTSANSERPAIGTTDST[Phospho (STY)]MPLLPAEPR_	TCO5	Two-component-like sensor kinase	#N/A	#N/A	#N/A	1.37612	#N/A	1.47438
CNAG_00106	_IMS[Phospho (STY)]GATMMSPTMEK_	TCO5	Two-component-like sensor kinase	#N/A	#N/A	#N/A	5.44014	5.25814	#N/A
CNAG_00106	_IVVDNNFEHFTPAVPKS[Phospho (STY)]DSGYGSGR_	TCO5	Two-component-like sensor kinase	#N/A	#N/A	#N/A	1.09444	1.01821	1.32601
CNAG_00106	_LEPT[Phospho (STY)]PATEPDDPLR_	TCO5	Two-component-like sensor kinase	#N/A	#N/A	#N/A	#N/A	#N/A	1.32343
CNAG_00106	_SRPDSGRGT[Phospho (STY)]HAHTLMDLEK_	TCO5	Two-component-like sensor kinase	#N/A	#N/A	#N/A	#N/A	#N/A	1.53919
CNAG_00106	_YMDY[Phospho (STY)]ADESPMSPVHMR_	TCO5	Two-component-like sensor kinase	#N/A	#N/A	#N/A	3.93095	3.52163	4.58467
CNAG_00110	_QLIVELWLFLFDLFT[Phospho (STY)]PVPQTPNK_	HPI3	hypothetical protein	#N/A	#N/A	5.3223	#N/A	#N/A	#N/A
CNAG_00110	_RPS[Phospho (STY)]GGKQPPGLMGDPK_	HPI3	hypothetical protein	#N/A	7.44506	6.72752	#N/A	#N/A	#N/A
CNAG_00111	_LAAMGGNTPYLGS[Phospho (STY)]ATSPVAGQVHPR_	-	splicing factor 3A subunit 1	#N/A	5.25909	5.37156	#N/A	#N/A	#N/A
CNAG_00119	_TIDSSLPNPDPAAMDVDLDEGLEDLES[Phospho (STY)]IASEGSNK_	-	hypothetical protein	#N/A	3.0416	3.1955	#N/A	#N/A	#N/A
CNAG_00119	_ILIPS[Phospho (STY)]GAER_	-	hypothetical protein	#N/A	#N/A	3.57487	#N/A	#N/A	#N/A
CNAG_00121	_VAVVGSGNWGSAIS[Phospho (STY)]R_	-	glycerol-3-phosphate dehydrogenase (NAD())	#N/A	2.89604	2.65474	#N/A	1.25253	#N/A
CNAG_00127	_LLEALENEGSPS[Phospho (STY)]VNENSSTSTFQR_	-	hypothetical protein	4.53309	#N/A	#N/A	#N/A	#N/A	#N/A
CNAG_00130	_VPAAS[Phospho (STY)]PNYREEAEKIVADER_	RCK2	CAMK/CAMK1/CAMK1-RCK protein kinase	#N/A	#N/A	1.10104	#N/A	#N/A	#N/A
CNAG_00130	_PMPSESPMY[Phospho (STY)]S[Phospho (STY)]PLLASIR_	RCK2	CAMK/CAMK1/CAMK1-RCK protein kinase	#N/A	#N/A	1.12138	#N/A	#N/A	#N/A
CNAG_00130	_PMPS[Phospho (STY)]ESPM[Oxidation (M)]YSPLLASIR_	RCK2	CAMK/CAMK1/CAMK1-RCK protein kinase	#N/A	#N/A	1.12178	#N/A	#N/A	#N/A
CNAG_00130	_PMPSESPM[Oxidation (M)]Y[Phospho (STY)]SPLLASIR_	RCK2	CAMK/CAMK1/CAMK1-RCK protein kinase	#N/A	#N/A	1.15848	#N/A	#N/A	#N/A
CNAG_00130	_PMPS[Phospho (STY)]ESPMY[Phospho (STY)]SPLLASIR_	RCK2	CAMK/CAMK1/CAMK1-RCK protein kinase	#N/A	#N/A	1.21648	#N/A	#N/A	#N/A
CNAG_00130	_PMPSES[Phospho (STY)]PMY[Phospho (STY)]SPLLASIR_	RCK2	CAMK/CAMK1/CAMK1-RCK protein kinase	#N/A	#N/A	1.2165	#N/A	#N/A	#N/A
CNAG_00130	_PMPSES[Phospho (STY)]PMYS[Phospho (STY)]PLLASIR_	RCK2	CAMK/CAMK1/CAMK1-RCK protein kinase	#N/A	#N/A	1.29577	#N/A	#N/A	#N/A
CNAG_00130	_PMPSESPM[Oxidation (M)]YS[Phospho (STY)]PLLASIR_	RCK2	CAMK/CAMK1/CAMK1-RCK protein kinase	#N/A	#N/A	1.37575	#N/A	#N/A	#N/A
CNAG_00130	_PM[Oxidation (M)]PS[Phospho (STY)]ESPMYSPLLASIR_	RCK2	CAMK/CAMK1/CAMK1-RCK protein kinase	#N/A	#N/A	1.41955	#N/A	#N/A	#N/A
CNAG_00130	_PMPS[Phospho (STY)]ESPMYSPLLASIR_	RCK2	CAMK/CAMK1/CAMK1-RCK protein kinase	1.07452	#N/A	1.42365	#N/A	#N/A	#N/A
CNAG_00130	_PMPSES[Phospho (STY)]PMYSPLLASIR_	RCK2	CAMK/CAMK1/CAMK1-RCK protein kinase	1.05758	#N/A	1.43003	#N/A	#N/A	#N/A
CNAG_00130	_PM[Oxidation (M)]PSESPMYS[Phospho (STY)]PLLASIR_	RCK2	CAMK/CAMK1/CAMK1-RCK protein kinase	1.63115	#N/A	1.49825	#N/A	#N/A	#N/A
CNAG_00130	_EARS[Phospho (STY)]PGVGALK_	RCK2	CAMK/CAMK1/CAMK1-RCK protein kinase	#N/A	#N/A	1.51019	#N/A	#N/A	#N/A
CNAG_00130	_PM[Oxidation (M)]PSES[Phospho (STY)]PMYSPLLASIR_	RCK2	CAMK/CAMK1/CAMK1-RCK protein kinase	#N/A	#N/A	1.61218	#N/A	#N/A	#N/A
CNAG_00130	_PM[Oxidation (M)]PSESPM[Oxidation (M)]YS[Phospho (STY)]PLLASIR_	RCK2	CAMK/CAMK1/CAMK1-RCK protein kinase	#N/A	#N/A	1.78214	#N/A	#N/A	#N/A
CNAG_00130	_PMPSESPMYS[Phospho (STY)]PLLASIR_	RCK2	CAMK/CAMK1/CAMK1-RCK protein kinase	1.57077	#N/A	1.81191	#N/A	#N/A	#N/A
CNAG_00130	_PMPSESPMY[Phospho (STY)]SPLLASIR_	RCK2	CAMK/CAMK1/CAMK1-RCK protein kinase	1.59646	#N/A	1.89161	#N/A	#N/A	#N/A
CNAG_00130	_PMPSESPMYSPLLAS[Phospho (STY)]IR_	RCK2	CAMK/CAMK1/CAMK1-RCK protein kinase	9.75728	9.00787	9.67733	#N/A	#N/A	#N/A
CNAG_00130	_S[Phospho (STY)]PGVGALKEAFDVTYAVHR_	RCK2	CAMK/CAMK1/CAMK1-RCK protein kinase	1.23082	#N/A	#N/A	#N/A	#N/A	#N/A
CNAG_00130	_IVWDEQTM[Oxidation (M)]TPC[Carbamidomethyl (C)]GT[Phospho (STY)]VGYTAPEIVKDER_	RCK2	CAMK/CAMK1/CAMK1-RCK protein kinase	1.45936	#N/A	#N/A	#N/A	#N/A	#N/A
CNAG_00130	_GYYTFLS[Phospho (STY)]PWWDDISHSAK_	RCK2	CAMK/CAMK1/CAMK1-RCK protein kinase	#N/A	#N/A	#N/A	1.66346	2.21714	#N/A
CNAG_00133	_RAVS[Phospho (STY)]DEASVESR_	-	hypothetical protein	#N/A	#N/A	#N/A	#N/A	1.94331	2.21043
CNAG_00134	_ILEAAEPVEEESLSAMSS[Phospho (STY)]PPS[Phospho (STY)]S[Phospho (STY)]PEAALTTVPIAFR_	-	hypothetical protein	#N/A	3.96537	4.53999	#N/A	#N/A	#N/A
CNAG_00135	_AIWETEEWKAEHGERPEDGQEAT[Phospho (STY)]E_	-	cyclophilin	#N/A	#N/A	#N/A	#N/A	1.05005	#N/A
CNAG_00139	_[Acetyl (Protein N-term)]SDNKIQLY[Phospho (STY)]QFEGSVWSNAPK_	-	hypothetical protein	#N/A	5.12966	4.88375	#N/A	#N/A	#N/A
CNAG_00140	_SNGY[Phospho (STY)]AFIVYER_	-	U1 small nuclear ribonucleoprotein 70kDa	#N/A	#N/A	#N/A	#N/A	6.6066	7.29497
CNAG_00141	_TY[Phospho (STY)]VGQGC[Carbamidomethyl (C)]LLALDEGMTVLPQMNSEGLC[Carbamidomethyl (C)]K_	-	monooxygenase	#N/A	4.51872	#N/A	#N/A	#N/A	#N/A
CNAG_00142	_SLEPT[Phospho (STY)]LADEDDLAAVAGTNEPDSNFSMK_	-	hypothetical protein	4.1755	3.91634	4.23984	#N/A	#N/A	#N/A
CNAG_00142	_S[Phospho (STY)]LEPTLADEDDLAAVAGTNEPDSNFSMK_	-	hypothetical protein	#N/A	#N/A	6.09497	#N/A	#N/A	#N/A
CNAG_00142	_EIDGLEIIS[Phospho (STY)]DVESEAGSEDIDMDQLR_	-	hypothetical protein	#N/A	1.11112	#N/A	#N/A	#N/A	#N/A
CNAG_00142	_EIDGLEIIS[Phospho (STY)]DVES[Phospho (STY)]EAGS[Phospho (STY)]EDIDMDQLR_	-	hypothetical protein	#N/A	4.36577	#N/A	#N/A	#N/A	#N/A
CNAG_00144	_EGQEVVPPPSYGDSSTSARPLT[Phospho (STY)]PPPSFPQSFGC[Carbamidomethyl (C)]IHLAR_	-	hypothetical protein, variant	#N/A	#N/A	1.33261	#N/A	#N/A	#N/A
CNAG_00144	_EGQEVVPPPSYGDSSTS[Phospho (STY)]ARPLTPPPSFPQSFGC[Carbamidomethyl (C)]IHLAR_	-	hypothetical protein, variant	#N/A	#N/A	1.34262	#N/A	#N/A	#N/A
CNAG_00144	_EGQEVVPPPSY[Phospho (STY)]GDSSTSARPLTPPPSFPQSFGC[Carbamidomethyl (C)]IHLAR_	-	hypothetical protein, variant	#N/A	#N/A	1.34686	#N/A	#N/A	#N/A
CNAG_00144	_EGQEVVPPPSYGDSSTSARPLTPPPS[Phospho (STY)]FPQSFGC[Carbamidomethyl (C)]IHLAR_	-	hypothetical protein, variant	1.52706	#N/A	1.49114	#N/A	#N/A	#N/A
CNAG_00147	_ANVYVGFQVQLDLTGVFMHGKIPT[Phospho (STY)]LK_	-	pre-mRNA-processing-splicing factor 8	-6.74799	-6.06402	#N/A	5.69105	#N/A	#N/A
CNAG_00148	_GENRPPS[Phospho (STY)]RGPAFAPPPIAPFGS[Phospho (STY)]PPPVPPLSAPASGPPR_	-	hypothetical protein	1.45192	#N/A	1.02272	#N/A	#N/A	#N/A
CNAG_00148	_AEGPFAHFSSVS[Phospho (STY)]PDPSGSISR_	-	hypothetical protein	#N/A	1.13882	1.18669	1.11646	#N/A	#N/A
CNAG_00148	_NPS[Phospho (STY)]MADVGSYSASNGFLGVQPMSR_	-	hypothetical protein	#N/A	#N/A	1.68751	#N/A	#N/A	#N/A
CNAG_00148	_RTPQPEPIAAFDSSIY[Phospho (STY)]EPPAPASTQFTTSTASYFPANR_	-	hypothetical protein	1.03076	1.24727	1.71092	#N/A	1.28245	1.13929
CNAG_00148	_RT[Phospho (STY)]PQPEPIAAFDSSIYEPPAPASTQFTTSTASYFPANR_	-	hypothetical protein	1.03104	1.33109	1.82658	#N/A	1.01679	#N/A
CNAG_00148	_NPSMADVGSY[Phospho (STY)]SASNGFLGVQPMSR_	-	hypothetical protein	#N/A	#N/A	1.84907	3.45043	#N/A	4.40952
CNAG_00148	_LQSQSSPY[Phospho (STY)]AR_	-	hypothetical protein	#N/A	#N/A	4.67131	#N/A	#N/A	#N/A
CNAG_00148	_LQSQSS[Phospho (STY)]PYAR_	-	hypothetical protein	5.6236	#N/A	4.94728	#N/A	#N/A	#N/A
CNAG_00148	_SATLPANSFGVT[Phospho (STY)]AAAPSSHVPSNPK_	-	hypothetical protein	#N/A	#N/A	5.52894	#N/A	#N/A	#N/A
CNAG_00148	_FAMMGPANWQETEQAPPPLTAGPGATLAPVASRS[Phospho (STY)]PALQAQSAMSENAAR_	-	hypothetical protein	5.99143	5.7642	6.17549	#N/A	#N/A	#N/A
CNAG_00148	_SPIPSSTSLY[Phospho (STY)]APSHPSSTYNPVASPAQSPTYGMSPPSTNYFQSMPGPR_	-	hypothetical protein	6.60546	5.78998	6.38734	#N/A	-1.22616	#N/A
CNAG_00148	_VAYSPEET[Phospho (STY)]EEVESGGK_	-	hypothetical protein	5.47018	#N/A	6.52154	#N/A	#N/A	#N/A
CNAG_00148	_SATLPANSFGVTAAAPS[Phospho (STY)]SHVPSNPK_	-	hypothetical protein	#N/A	#N/A	6.66358	#N/A	7.48258	#N/A
CNAG_00148	_VAYS[Phospho (STY)]PEETEEVESGGK_	-	hypothetical protein	#N/A	7.55467	8.102	#N/A	#N/A	#N/A
CNAG_00148	_IPSYGYAS[Phospho (STY)]GR_	-	hypothetical protein	7.22799	7.49683	8.73188	#N/A	#N/A	#N/A
CNAG_00148	_TSAPSPMTHIPAPPLS[Phospho (STY)]EEPTFYAPPGVQQK_	-	hypothetical protein	1.01979	#N/A	#N/A	#N/A	#N/A	#N/A
CNAG_00148	_GPAYAPHPKDQSPVPPVPT[Phospho (STY)]LPTLPVELPR_	-	hypothetical protein	1.10193	#N/A	#N/A	#N/A	#N/A	#N/A
CNAG_00148	_DQS[Phospho (STY)]PVPPVPTLPTLPVELPR_	-	hypothetical protein	#N/A	#N/A	#N/A	#N/A	1.15289	#N/A
CNAG_00148	_IS[Phospho (STY)]RPASAVSTGVSSAFDVSPIVPPHQVK_	-	hypothetical protein	#N/A	#N/A	#N/A	#N/A	#N/A	1.1051
CNAG_00148	_NPSMADVGSYS[Phospho (STY)]ASNGFLGVQPMSR_	-	hypothetical protein	#N/A	#N/A	#N/A	#N/A	6.25583	5.80297
CNAG_00148	_NPSMADVGSYSASNGFLGVQPMS[Phospho (STY)]R_	-	hypothetical protein	#N/A	#N/A	#N/A	#N/A	#N/A	1.16704
CNAG_00148	_SSLTMSQGQGPPSGPLSGPPS[Phospho (STY)]GPPSQPPSR_	-	hypothetical protein	#N/A	#N/A	#N/A	#N/A	1.22627	#N/A
CNAG_00148	_TPST[Phospho (STY)]SATSASLDDLLSGSRPASK_	-	hypothetical protein	#N/A	#N/A	#N/A	#N/A	1.11196	#N/A
CNAG_00165	_HGSHHS[Phospho (STY)]ITPSEVPC[Carbamidomethyl (C)]R_	-	methylthioadenosine phosphorylase	#N/A	5.66766	5.80571	#N/A	#N/A	#N/A
CNAG_00165	_HGS[Phospho (STY)]HHSITPSEVPC[Carbamidomethyl (C)]R_	-	methylthioadenosine phosphorylase	#N/A	5.60094	6.02861	#N/A	#N/A	#N/A
CNAG_00166	_PLVTALASINIKKPT[Phospho (STY)]EIQAAC[Carbamidomethyl (C)]VEPILSGR_	-	ATP-dependent RNA helicase DBP8	#N/A	#N/A	#N/A	#N/A	2.29115	#N/A
CNAG_00166	_S[Phospho (STY)]LSLDLDVEGEKDNENEEPESR_	-	ATP-dependent RNA helicase DBP8	#N/A	#N/A	#N/A	#N/A	#N/A	1.34033
CNAG_00172	_GLISQSGDSVGGNLS[Phospho (STY)]FDSKSPTSGSSR_	-	kinesin	6.62704	#N/A	5.85778	#N/A	#N/A	#N/A
CNAG_00172	_RMSVQAGSVGSTY[Phospho (STY)]SPPVR_	-	kinesin	#N/A	6.46897	#N/A	#N/A	#N/A	#N/A
CNAG_00173	_LGAIDRS[Phospho (STY)]PVIGPLVR_	-	hypothetical protein	#N/A	#N/A	#N/A	#N/A	1.04257	#N/A
CNAG_00174	_RHSKFT[Phospho (STY)]PLPAASLPSFDR_	-	hypothetical protein	#N/A	1.44752	-6.96734	-7.62108	#N/A	-2.52095
CNAG_00174	_RHS[Phospho (STY)]KFTPLPAASLPSFDR_	-	hypothetical protein	-1.0526	1.24187	-1.21237	-2.24731	#N/A	-2.42607
CNAG_00174	_FSETSSASSS[Phospho (STY)]ALIPISPVAPTLAPR_	-	hypothetical protein	#N/A	3.7621	4.28396	#N/A	#N/A	#N/A
CNAG_00174	_SRLSVYHDNGGQLS[Phospho (STY)]HSTR_	-	hypothetical protein	-2.51738	#N/A	#N/A	#N/A	4.12568	#N/A
CNAG_00174	_FTPLPAAS[Phospho (STY)]LPSFDR_	-	hypothetical protein	#N/A	#N/A	#N/A	#N/A	1.2701	#N/A
CNAG_00174	_SRLSVY[Phospho (STY)]HDNGGQLSHSTR_	-	hypothetical protein	#N/A	#N/A	#N/A	#N/A	6.53403	5.49759
CNAG_00175	_TIPHAQS[Phospho (STY)]PPPFPPPPPPAIPAK_	-	hypothetical protein	#N/A	1.3142	1.51699	#N/A	#N/A	#N/A
CNAG_00175	_T[Phospho (STY)]IPHAQSPPPFPPPPPPAIPAK_	-	hypothetical protein	#N/A	#N/A	1.80921	#N/A	#N/A	#N/A
CNAG_00175	_T[Phospho (STY)]IPHAQSPPPFPPPPPPAIPAKNDAQSPGPSVGPGAESINR_	-	hypothetical protein	7.79623	7.59933	7.83102	#N/A	#N/A	-8.46534
CNAG_00178	_NTPSDVINVTPT[Phospho (STY)]KPIPMQLQR_	-	DNA repair protein REV1	#N/A	6.73591	6.19541	#N/A	#N/A	#N/A
CNAG_00184	_NALAINGVFYHATC[Carbamidomethyl (C)]RAEQT[Phospho (STY)]SALK_	-	pre-mRNA cleavage complex 2 protein Pcf11	5.50261	#N/A	4.43912	#N/A	#N/A	#N/A
CNAG_00184	_TT[Phospho (STY)]PSNEGLKPEAQK_	-	pre-mRNA cleavage complex 2 protein Pcf11	5.8211	5.31659	5.24596	#N/A	#N/A	#N/A
CNAG_00184	_SGIGS[Phospho (STY)]QPQTPDVER_	-	pre-mRNA cleavage complex 2 protein Pcf11	6.29906	6.39211	6.35702	#N/A	#N/A	#N/A
CNAG_00184	_NALAINGVFYHAT[Phospho (STY)]C[Carbamidomethyl (C)]RAEQTSALK_	-	pre-mRNA cleavage complex 2 protein Pcf11	6.46843	7.11758	6.79918	#N/A	#N/A	#N/A
CNAG_00184	_TT[Phospho (STY)]PSNEGLKPEAQKR_	-	pre-mRNA cleavage complex 2 protein Pcf11	5.95079	6.84416	#N/A	#N/A	#N/A	#N/A
CNAG_00184	_SGIGS[Phospho (STY)]QPQT[Phospho (STY)]PDVER_	-	pre-mRNA cleavage complex 2 protein Pcf11	1.11772	#N/A	#N/A	#N/A	#N/A	#N/A
CNAG_00184	_SGIGSQPQTPDVERGT[Phospho (STY)]PGPNMVATTEAYEDMILR_	-	pre-mRNA cleavage complex 2 protein Pcf11	#N/A	#N/A	#N/A	#N/A	#N/A	1.33563
CNAG_00192	_VHMREGFFEGDSFHLSHGAHQTQIY[Phospho (STY)]EEVETR_	-	hypothetical protein	#N/A	#N/A	#N/A	#N/A	#N/A	6.50562
CNAG_00193	_NS[Phospho (STY)]FSQSVQPSSHSQLSSSR_	GAT1	GATA type zinc finger protein asd-4	#N/A	1.4319	-1.86698	#N/A	#N/A	#N/A
CNAG_00193	_VPSTPLMTPPLNS[Phospho (STY)]FGSFPVTR_	GAT1	GATA type zinc finger protein asd-4	#N/A	#N/A	2.39393	#N/A	#N/A	#N/A
CNAG_00193	_NQSSANSPGILHNSGGLS[Phospho (STY)]GFPVSQQQYNNVTFAQPDK_	GAT1	GATA type zinc finger protein asd-4	7.3633	8.08664	7.7097	#N/A	#N/A	#N/A
CNAG_00193	_VPSTPLMTPPLNSFGS[Phospho (STY)]FPVTR_	GAT1	GATA type zinc finger protein asd-4	#N/A	#N/A	#N/A	#N/A	1.22004	#N/A
CNAG_00194	_RVS[Phospho (STY)]LGAEEEENGAK_	-	hypothetical protein	4.94249	5.37438	#N/A	#N/A	#N/A	-1.19794
CNAG_00235	_GGAAIGDLDGDT[Phospho (STY)]AVESQHSR_	AMT1	amt family ammonium transporter	8.6567	2.35819	9.30212	#N/A	#N/A	#N/A
CNAG_00237	_SAEPTEET[Phospho (STY)]EEGKTPVK_	-	3-isopropylmalate dehydratase, large subunit	#N/A	#N/A	1.47461	#N/A	#N/A	#N/A
CNAG_00240	_DLSVNTMNVPS[Phospho (STY)]PVDGEAETPTGSSGGKK_	-	hypothetical protein	#N/A	5.2925	4.83409	#N/A	#N/A	#N/A
CNAG_00240	_DLSVNTMNVPSPVDGEAETPT[Phospho (STY)]GSSGGK_	-	hypothetical protein	4.98053	4.27349	#N/A	#N/A	#N/A	#N/A
CNAG_00240	_DLSVNTMNVPS[Phospho (STY)]PVDGEAET[Phospho (STY)]PTGSSGGK_	-	hypothetical protein	7.62903	#N/A	#N/A	#N/A	#N/A	#N/A
CNAG_00241	_SSLPTPT[Phospho (STY)]HSR_	-	protein AIR1/2	6.3012	6.06455	5.77208	#N/A	7.27822	6.71294
CNAG_00241	_SSLPTPTHS[Phospho (STY)]R_	-	protein AIR1/2	#N/A	4.6436	#N/A	#N/A	#N/A	#N/A
CNAG_00241	_SSLPT[Phospho (STY)]PTHSR_	-	protein AIR1/2	7.47896	7.43702	#N/A	#N/A	#N/A	#N/A
CNAG_00241	_AMDS[Phospho (STY)]PSVR_	-	protein AIR1/2	8.20956	8.13152	#N/A	#N/A	#N/A	#N/A
CNAG_00241	_GRRS[Phospho (STY)]S[Phospho (STY)]NS[Phospho (STY)]PSALPSLLSR_	-	protein AIR1/2	1.28312	#N/A	#N/A	#N/A	#N/A	#N/A
CNAG_00246	_SLVGPISAITSMDATPDS[Phospho (STY)]GLPTEPPR_	-	hypothetical protein	#N/A	#N/A	1.01108	#N/A	#N/A	#N/A
CNAG_00246	_SLVGPISAIT[Phospho (STY)]SMDATPDSGLPTEPPR_	-	hypothetical protein	#N/A	#N/A	1.27872	#N/A	#N/A	#N/A
CNAG_00246	_TTES[Phospho (STY)]IQVIDDQGKEIDPNEDEWESGEDVK_	-	hypothetical protein	#N/A	#N/A	5.54401	#N/A	#N/A	#N/A
CNAG_00246	_TTGFAGT[Phospho (STY)]VQPPDPQVAAEMPQVDHPIITNPIKR_	-	hypothetical protein	#N/A	#N/A	6.05928	#N/A	#N/A	#N/A
CNAG_00246	_STS[Phospho (STY)]GGGLPRDPTDQR_	-	hypothetical protein	#N/A	6.8443	6.18648	#N/A	#N/A	#N/A
CNAG_00246	_MVSPTESDQKAS[Phospho (STY)]PKDDLPEK_	-	hypothetical protein	#N/A	6.50553	6.40293	#N/A	#N/A	#N/A
CNAG_00246	_SLVGPISAITSM[Oxidation (M)]DAT[Phospho (STY)]PDSGLPTEPPR_	-	hypothetical protein	#N/A	4.68188	#N/A	#N/A	#N/A	#N/A
CNAG_00246	_AVSDT[Phospho (STY)]TSDPKR_	-	hypothetical protein	#N/A	#N/A	#N/A	3.48688	#N/A	3.23222
CNAG_00246	_LTRTDSTMSIASHSSAAS[Phospho (STY)]NVSRPSAK_	-	hypothetical protein	#N/A	#N/A	#N/A	#N/A	#N/A	5.78405
CNAG_00246	_SAHET[Phospho (STY)]LVSTFR_	-	hypothetical protein	#N/A	#N/A	#N/A	#N/A	#N/A	5.77541
CNAG_00248	_LSSQQAAASSPSGS[Phospho (STY)]PQGQTTEEEATMIR_	VPS36	ESCRT-II complex subunit VPS36	#N/A	4.42028	#N/A	#N/A	#N/A	#N/A
CNAG_00248	_GVALLSPQALIDTLPYLPNY[Phospho (STY)]TSPSIHSLR_	VPS36	ESCRT-II complex subunit VPS36	#N/A	6.53832	#N/A	#N/A	#N/A	#N/A
CNAG_00248	_LS[Phospho (STY)]SQQAAASSPSGSPQGQTTEEEATMIR_	VPS36	ESCRT-II complex subunit VPS36	10.6755	7.89701	#N/A	#N/A	-11.142	-11.2066
CNAG_00248	_LSS[Phospho (STY)]QQAAASSPSGSPQGQTTEEEATMIR_	VPS36	ESCRT-II complex subunit VPS36	11.3811	#N/A	#N/A	#N/A	-11.74	-11.5977
CNAG_00249	_DYSHRPSAS[Phospho (STY)]SAPLLHR_	-	hypothetical protein	#N/A	1.38589	#N/A	-4.6953	#N/A	-3.93838
CNAG_00249	_RDYSHRPSASS[Phospho (STY)]APLLHR_	-	hypothetical protein	#N/A	2.0415	#N/A	-3.19632	#N/A	-2.98148
CNAG_00249	_RDYSHRPSAS[Phospho (STY)]SAPLLHR_	-	hypothetical protein	#N/A	4.75654	#N/A	#N/A	#N/A	-2.20121
CNAG_00249	_SC[Carbamidomethyl (C)]GSNPASPALSPQDSTTRLPS[Phospho (STY)]SSR_	-	hypothetical protein	4.68268	#N/A	#N/A	#N/A	#N/A	#N/A
CNAG_00253	_LASGASFNSTLSVAQSRIDSIINS[Phospho (STY)]K_	-	hypothetical protein	#N/A	#N/A	#N/A	3.74455	#N/A	#N/A
CNAG_00256	_LDKNLY[Phospho (STY)]NGAC[Carbamidomethyl (C)]VSVGR_	-	Aspartate-semialdehyde dehydrogenase	#N/A	#N/A	#N/A	#N/A	6.04058	5.6614
CNAG_00257	_SLLLSPTAQVRPSS[Phospho (STY)]R_	-	kinesin family member 21A, variant	#N/A	#N/A	2.76611	#N/A	#N/A	#N/A
CNAG_00257	_TMHSQVVISLQTAHT[Phospho (STY)]HALETLQAEQDVVSR_	-	kinesin family member 21A, variant	#N/A	3.82121	#N/A	#N/A	#N/A	#N/A
CNAG_00257	_FAMSEISSGFNT[Phospho (STY)]GPVTTPPC[Carbamidomethyl (C)]ER_	-	kinesin family member 21A, variant	7.15568	7.0807	#N/A	#N/A	#N/A	#N/A
CNAG_00257	_QSFAPPSPLSPSGITRPNSSS[Phospho (STY)]GQNSFSHPR_	-	kinesin family member 21A, variant	#N/A	#N/A	#N/A	1.82466	1.77442	1.62378
CNAG_00257	_RPSSMIGFPGS[Phospho (STY)]GPR_	-	kinesin family member 21A, variant	#N/A	#N/A	#N/A	8.15577	7.51057	#N/A
CNAG_00260	_YDDELRDDSYS[Phospho (STY)]AKR_	-	transformer-2 protein	#N/A	#N/A	1.01116	#N/A	#N/A	#N/A
CNAG_00260	_[Acetyl (Protein N-term)]S[Phospho (STY)]QPDSVAPPR_	-	transformer-2 protein	#N/A	1.00226	1.15798	#N/A	#N/A	#N/A
CNAG_00260	_VDYSATQKPHSSTPGQY[Phospho (STY)]MGAK_	-	transformer-2 protein	#N/A	#N/A	1.31547	#N/A	#N/A	#N/A
CNAG_00260	_VDYSATQKPHSS[Phospho (STY)]TPGQYMGAK_	-	transformer-2 protein	#N/A	6.01462	5.47349	#N/A	#N/A	#N/A
CNAG_00260	_YSAS[Phospho (STY)]PAR_	-	transformer-2 protein	1.9754	#N/A	#N/A	#N/A	#N/A	#N/A
CNAG_00267	_EINQVHT[Phospho (STY)]PPQADTVQR_	-	hypothetical protein	8.28998	8.02492	7.89601	#N/A	#N/A	6.34066
CNAG_00267	_[Acetyl (Protein N-term)]MYSLPTQSLSHINPPSHPSSPLS[Phospho (STY)]AAFPSSPSLLR_	-	hypothetical protein	#N/A	1.0249	#N/A	#N/A	#N/A	#N/A
CNAG_00269	_SNLGFMLHS[Phospho (STY)]PLK_	-	Sorbitol dehydrogenase	1.69778	1.87886	2.56164	#N/A	#N/A	#N/A
CNAG_00269	_SNLGFM[Oxidation (M)]LHS[Phospho (STY)]PLK_	-	Sorbitol dehydrogenase	#N/A	#N/A	#N/A	#N/A	3.70017	#N/A
CNAG_00269	_SNLGFMLHSPLKT[Phospho (STY)]SFEK_	-	Sorbitol dehydrogenase	#N/A	#N/A	#N/A	#N/A	#N/A	1.41693
CNAG_00271	_KSNTGT[Phospho (STY)]PVASEDGVSIAAVIDR_	-	INO80 complex subunit C	#N/A	#N/A	1.07904	#N/A	#N/A	#N/A
CNAG_00272	_DVAGVFDGLC[Carbamidomethyl (C)]PKLDS[Phospho (STY)]DMSAK_	-	hypothetical protein	6.88735	5.58922	#N/A	#N/A	#N/A	#N/A
CNAG_00272	_QNQSSTGGVS[Phospho (STY)]EDLVNGNKSPGVTGQTR_	-	hypothetical protein	#N/A	#N/A	#N/A	#N/A	5.84642	#N/A
CNAG_00276	_QASMNS[Phospho (STY)]LS[Phospho (STY)]S[Phospho (STY)]DDGPNEPVISFK_	-	hypothetical protein	#N/A	#N/A	6.30903	#N/A	#N/A	#N/A
CNAG_00279	_RNVDGASS[Phospho (STY)]AGEVTS[Phospho (STY)]GGETSGAEGK_	-	hypothetical protein	#N/A	#N/A	1.13555	#N/A	#N/A	#N/A
CNAG_00279	_RNVDGASSAGEVT[Phospho (STY)]S[Phospho (STY)]GGETS[Phospho (STY)]GAEGK_	-	hypothetical protein	#N/A	#N/A	1.45946	#N/A	4.43901	#N/A
CNAG_00279	_NVDGAS[Phospho (STY)]S[Phospho (STY)]AGEVTS[Phospho (STY)]GGET[Phospho (STY)]S[Phospho (STY)]GAEGKGK_	-	hypothetical protein	5.90546	#N/A	6.87569	#N/A	2.52823	#N/A
CNAG_00279	_NVDGAS[Phospho (STY)]S[Phospho (STY)]AGEVTSGGETS[Phospho (STY)]GAEGKGKK_	-	hypothetical protein	#N/A	#N/A	#N/A	4.73465	#N/A	4.09436
CNAG_00279	_NVDGASS[Phospho (STY)]AGEVT[Phospho (STY)]S[Phospho (STY)]GGETS[Phospho (STY)]GAEGKGK_	-	hypothetical protein	#N/A	#N/A	#N/A	#N/A	5.46928	#N/A
CNAG_00279	_NVDGASSAGEVT[Phospho (STY)]S[Phospho (STY)]GGETS[Phospho (STY)]GAEGK_	-	hypothetical protein	#N/A	#N/A	#N/A	#N/A	4.00036	#N/A
CNAG_00279	_NVDGASSAGEVTS[Phospho (STY)]GGET[Phospho (STY)]S[Phospho (STY)]GAEGKGK_	-	hypothetical protein	#N/A	#N/A	#N/A	#N/A	1.11739	#N/A
CNAG_00279	_NVDGASSAGEVTS[Phospho (STY)]GGETS[Phospho (STY)]GAEGK_	-	hypothetical protein	#N/A	#N/A	#N/A	#N/A	1.33547	#N/A
CNAG_00279	_NVDGASSAGEVTSGGET[Phospho (STY)]S[Phospho (STY)]GAEGK_	-	hypothetical protein	#N/A	#N/A	#N/A	#N/A	1.34304	#N/A
CNAG_00279	_RNVDGASS[Phospho (STY)]AGEVTS[Phospho (STY)]GGETS[Phospho (STY)]GAEGK_	-	hypothetical protein	#N/A	#N/A	#N/A	5.25666	5.26049	4.21496
CNAG_00279	_RNVDGASSAGEVT[Phospho (STY)]SGGETS[Phospho (STY)]GAEGK_	-	hypothetical protein	#N/A	#N/A	#N/A	#N/A	1.50793	#N/A
CNAG_00279	_RNVDGASSAGEVTS[Phospho (STY)]GGETS[Phospho (STY)]GAEGK_	-	hypothetical protein	#N/A	#N/A	#N/A	#N/A	1.45786	#N/A
CNAG_00279	_RNVDGASSAGEVTSGGET[Phospho (STY)]S[Phospho (STY)]GAEGK_	-	hypothetical protein	#N/A	#N/A	#N/A	#N/A	1.45893	#N/A
CNAG_00285	_SALY[Phospho (STY)]GWFSPPPSSMDAGGSKR_	-	hypothetical protein	7.05779	6.38557	6.63075	#N/A	#N/A	#N/A
CNAG_00285	_GDNMAPVKQQSEEPLLSWDELS[Phospho (STY)]QAASRPTSSSQK_	-	hypothetical protein	#N/A	#N/A	#N/A	#N/A	5.8397	#N/A
CNAG_00286	_APASSS[Phospho (STY)]DDGS[Phospho (STY)]VEVINSHR_	NAB2	putative nuclear polyadenylated mRNA-binding protein	4.24895	4.35173	4.42957	#N/A	#N/A	#N/A
CNAG_00286	_APAS[Phospho (STY)]S[Phospho (STY)]S[Phospho (STY)]DDGSVEVINSHR_	NAB2	putative nuclear polyadenylated mRNA-binding protein	5.89525	5.97622	6.35816	#N/A	#N/A	#N/A
CNAG_00286	_SHVS[Phospho (STY)]PSAVLGDTVGPSR_	NAB2	putative nuclear polyadenylated mRNA-binding protein	#N/A	5.42975	#N/A	#N/A	#N/A	#N/A
CNAG_00287	_SKLAESSPRPT[Phospho (STY)]AADR_	-	cytoplasmic protein	#N/A	#N/A	4.28452	#N/A	#N/A	#N/A
CNAG_00287	_LAESS[Phospho (STY)]PRPTAADR_	-	cytoplasmic protein	5.52467	#N/A	5.19599	#N/A	#N/A	#N/A
CNAG_00287	_LAES[Phospho (STY)]SPRPTAADR_	-	cytoplasmic protein	6.56471	#N/A	6.32273	#N/A	#N/A	#N/A
CNAG_00292	_TFDQNVTLGLVARPEDIS[Phospho (STY)]EEQPEGVPIVAADHK_	-	zinc finger protein	6.56184	7.60003	#N/A	#N/A	#N/A	#N/A
CNAG_00293	_ESGPPQAVNAPTKS[Phospho (STY)]QTGAVGGR_	RAS1	Ras-like protein	#N/A	6.82922	#N/A	#N/A	#N/A	#N/A
CNAG_00294	_NLEDEPEQRETPRPADT[Phospho (STY)]DAGSLPPSQSR_	-	splicing factor 45	7.05544	6.7515	6.71567	#N/A	#N/A	#N/A
CNAG_00299	_VDVIVTSYGTLSSEY[Phospho (STY)]QKWMR_	-	DNA repair protein rad5	#N/A	#N/A	-3.07277	5.45654	#N/A	#N/A
CNAG_00299	_LRPS[Phospho (STY)]PSTSTVGEK_	-	DNA repair protein rad5	#N/A	10.9871	9.79316	#N/A	#N/A	#N/A
CNAG_00299	_EMIAMYAGGVRAET[Phospho (STY)]PEDVDKAYAAK_	-	DNA repair protein rad5	#N/A	4.67866	#N/A	#N/A	#N/A	#N/A
CNAG_00299	_EMIAMYAGGVRAETPEDVDKAY[Phospho (STY)]AAK_	-	DNA repair protein rad5	#N/A	#N/A	#N/A	#N/A	#N/A	1.41803
CNAG_00300	_TRPSSS[Phospho (STY)]ASIAQR_	SPC97	gamma-tubulin complex component 2	6.43728	5.50539	5.69341	#N/A	#N/A	#N/A
CNAG_00311	_HLSSSSQMT[Phospho (STY)]VPREELVLFESQQDTR_	-	3-hydroxyisobutyryl-CoA hydrolase	4.79586	#N/A	4.89715	#N/A	#N/A	#N/A
CNAG_00311	_HLS[Phospho (STY)]SSSQMTVPREELVLFESQQDTR_	-	3-hydroxyisobutyryl-CoA hydrolase	6.0495	#N/A	6.44007	#N/A	#N/A	#N/A
CNAG_00315	_FQQLS[Phospho (STY)]PSDSEFEPTIKK_	-	HHE domain-containing protein	#N/A	#N/A	#N/A	#N/A	1.03962	#N/A
CNAG_00315	_FQQLSPSDS[Phospho (STY)]EFEPTIK_	-	HHE domain-containing protein	#N/A	#N/A	#N/A	3.51656	3.98124	#N/A
CNAG_00317	_MAHALPIRPSVPDGIDISTSAS[Phospho (STY)]PKPIPVAASSEAK_	-	hypothetical protein	#N/A	#N/A	1.01414	#N/A	#N/A	#N/A
CNAG_00317	_MAHALPIRPSVPDGIDISTSAS[Phospho (STY)]PK_	-	hypothetical protein	7.32028	8.31076	#N/A	#N/A	#N/A	#N/A
CNAG_00319	_SGLAGMTPHS[Phospho (STY)]MS[Phospho (STY)]STPIPNMAPGAGMR_	-	hypothetical protein	#N/A	#N/A	#N/A	#N/A	6.5997	#N/A
CNAG_00322	_LSSSGGPLHSESSINHS[Phospho (STY)]VPVLNSSVHPDHIR_	-	hypothetical protein	#N/A	6.08196	#N/A	#N/A	#N/A	#N/A
CNAG_00326	_DFTTTMDVVMS[Phospho (STY)]PEEKAEMEAAAK_	-	hypothetical protein	#N/A	#N/A	3.79897	#N/A	5.25187	5.34456
CNAG_00326	_PKLT[Phospho (STY)]PEQK_	-	hypothetical protein	#N/A	#N/A	5.13823	#N/A	8.9254	7.69118
CNAG_00326	_ADAEAS[Phospho (STY)]AEATEPSSK_	-	hypothetical protein	5.46267	4.98432	#N/A	#N/A	#N/A	#N/A
CNAG_00328	_ALHKLNS[Phospho (STY)]AVNVPSPLR_	-	DNA excision repair protein ERCC-5	4.81943	#N/A	#N/A	#N/A	#N/A	#N/A
CNAG_00330	_AAGFTVTDDPVS[Phospho (STY)]PR_	-	transcription factor TFIIIB component b''	1.03781	1.20505	1.31327	#N/A	#N/A	#N/A
CNAG_00330	_GASVLGDDEEAS[Phospho (STY)]LAGSVSSSR_	-	transcription factor TFIIIB component b''	#N/A	5.26961	#N/A	#N/A	#N/A	#N/A
CNAG_00334	_HWPFS[Phospho (STY)]VIDKDGSPYVEVDYLNEK_	-	hsp75-like protein	#N/A	#N/A	#N/A	#N/A	1.3326	1.84597
CNAG_00335	_MELDILSSAPPVNS[Phospho (STY)]S[Phospho (STY)]PGIPHADPR_	TAP42	hypothetical protein	#N/A	#N/A	1.47893	#N/A	#N/A	#N/A
CNAG_00335	_VLRPFTILPS[Phospho (STY)]NSGVEQR_	TAP42	hypothetical protein	#N/A	#N/A	#N/A	3.26047	#N/A	2.71046
CNAG_00337	_IQSQPSQMSFTELGSQGVNPLDQSFHLPTPETTSS[Phospho (STY)]ESPNNHNAHNNK_	-	hypothetical protein	1.00635	1.55868	1.04686	#N/A	#N/A	#N/A
CNAG_00337	_IQSQPSQMSFTELGSQGVNPLDQSFHLPTPETTSSES[Phospho (STY)]PNNHNAHNNK_	-	hypothetical protein	#N/A	1.49011	1.0921	#N/A	#N/A	#N/A
CNAG_00337	_IAFS[Phospho (STY)]PPTTMSSPFVSAGSTGGVVPTNDNGATK_	-	hypothetical protein	#N/A	1.04148	1.10174	#N/A	#N/A	#N/A
CNAG_00337	_IQSQPSQMSFTELGSQGVNPLDQSFHLPT[Phospho (STY)]PETTSSESPNNHNAHNNK_	-	hypothetical protein	#N/A	1.37763	1.12357	#N/A	#N/A	#N/A
CNAG_00337	_IAFSPPTTMSS[Phospho (STY)]PFVSAGSTGGVVPTNDNGATK_	-	hypothetical protein	#N/A	#N/A	1.1877	#N/A	#N/A	#N/A
CNAG_00337	_AFQSQHYGPST[Phospho (STY)]PMR_	-	hypothetical protein	#N/A	#N/A	2.66283	#N/A	#N/A	#N/A
CNAG_00337	_S[Phospho (STY)]LPNGGAEEDQMGQSIAEILAR_	-	hypothetical protein	#N/A	3.15898	2.94572	-2.21253	#N/A	-3.6251
CNAG_00337	_SSYPPATTPGGLDGLFSWSANGT[Phospho (STY)]PK_	-	hypothetical protein	#N/A	#N/A	3.21191	#N/A	#N/A	#N/A
CNAG_00337	_IAFSPPT[Phospho (STY)]TM[Oxidation (M)]SSPFVSAGSTGGVVPTNDNGATK_	-	hypothetical protein	#N/A	#N/A	3.92519	#N/A	#N/A	#N/A
CNAG_00337	_SSYPPATTPGGLDGLFSWS[Phospho (STY)]ANGTPK_	-	hypothetical protein	#N/A	#N/A	4.36097	#N/A	#N/A	#N/A
CNAG_00337	_IQSQPSQMSFTELGSQGVNPLDQSFHLPTPET[Phospho (STY)]TSS[Phospho (STY)]ESPNNHNAHNNK_	-	hypothetical protein	#N/A	5.41795	5.7411	#N/A	#N/A	#N/A
CNAG_00337	_IAFSPPTTM[Oxidation (M)]SSPFVS[Phospho (STY)]AGSTGGVVPTNDNGATK_	-	hypothetical protein	#N/A	#N/A	7.09274	#N/A	#N/A	#N/A
CNAG_00337	_GS[Phospho (STY)]PFSSATTASETR_	-	hypothetical protein	6.34534	6.94622	7.55843	#N/A	#N/A	#N/A
CNAG_00337	_RRSSY[Phospho (STY)]PPAT[Phospho (STY)]TPGGLDGLFSWSANGTPK_	-	hypothetical protein	#N/A	1.10633	#N/A	#N/A	#N/A	#N/A
CNAG_00337	_SLPNGGAEEDQMGQS[Phospho (STY)]IAEILAR_	-	hypothetical protein	#N/A	3.51374	#N/A	#N/A	#N/A	#N/A
CNAG_00337	_HWEPAIFSGLLGLFASGNM[Oxidation (M)]PS[Phospho (STY)]PAALPADR_	-	hypothetical protein	6.01546	#N/A	#N/A	#N/A	#N/A	-5.20921
CNAG_00337	_EGLVPITMGMVLC[Carbamidomethyl (C)]NEPADRIDPY[Phospho (STY)]VK_	-	hypothetical protein	#N/A	#N/A	#N/A	6.38014	#N/A	#N/A
CNAG_00342	_AAAGAVS[Phospho (STY)]PAPLAASTSTLAALAPSAPIAAVPTSK_	-	hypothetical protein	#N/A	#N/A	1.55656	#N/A	#N/A	#N/A
CNAG_00342	_AAAGAVSPAPLAAS[Phospho (STY)]TSTLAALAPSAPIAAVPTSK_	-	hypothetical protein	#N/A	#N/A	1.58804	#N/A	#N/A	#N/A
CNAG_00342	_AAAGAVSPAPLAASTST[Phospho (STY)]LAALAPSAPIAAVPTSK_	-	hypothetical protein	#N/A	#N/A	1.58804	#N/A	#N/A	#N/A
CNAG_00342	_ITPTPDPPDSDRPPSS[Phospho (STY)]APPPLPAEVGLGLLQGEEQLR_	-	hypothetical protein	#N/A	#N/A	1.81381	#N/A	#N/A	#N/A
CNAG_00342	_ITPTPDPPDS[Phospho (STY)]DRPPSSAPPPLPAEVGLGLLQGEEQLR_	-	hypothetical protein	#N/A	1.60528	2.3939	#N/A	#N/A	#N/A
CNAG_00342	_AAAGAVSPAPLAASTSTLAALAPSAPIAAVPTS[Phospho (STY)]K_	-	hypothetical protein	3.58723	3.92456	2.57012	#N/A	#N/A	#N/A
CNAG_00342	_RTSSINVPPPS[Phospho (STY)]QHQLPQRPDWAANNVPYHPSPIIPNPSVSDASAHR_	-	hypothetical protein	1.05708	#N/A	#N/A	#N/A	#N/A	#N/A
CNAG_00342	_RTSSINVPPPSQHQLPQRPDWAANNVPY[Phospho (STY)]HPSPIIPNPSVSDASAHR_	-	hypothetical protein	1.07403	#N/A	#N/A	#N/A	#N/A	#N/A
CNAG_00344	_ILT[Phospho (STY)]APSTPSR_	-	hypothetical protein	6.67437	#N/A	6.82685	#N/A	#N/A	#N/A
CNAG_00344	_NGDLQPIPT[Phospho (STY)]SSGGFHATSSAR_	-	hypothetical protein	#N/A	3.47347	#N/A	#N/A	#N/A	#N/A
CNAG_00346	_SPPSRTSTLTLTQTHTTPTDT[Phospho (STY)]PPQTVLHLR_	YPI1	hypothetical protein	#N/A	#N/A	-1.19417	#N/A	#N/A	1.04972
CNAG_00346	_S[Phospho (STY)]PPSRTSTLTLTQTHTTPTDTPPQTVLHLR_	YPI1	hypothetical protein	#N/A	#N/A	-1.15989	#N/A	#N/A	1.06123
CNAG_00346	_SPPSRTSTLTLTQTHTT[Phospho (STY)]PTDTPPQTVLHLR_	YPI1	hypothetical protein	#N/A	#N/A	-1.13853	#N/A	#N/A	1.06238
CNAG_00348	_IHSFVS[Phospho (STY)]DLSPASR_	-	hypothetical protein	#N/A	6.59904	6.89739	#N/A	#N/A	#N/A
CNAG_00348	_RIHSFVSDLSPAS[Phospho (STY)]RR_	-	hypothetical protein	7.06557	7.45314	6.9427	#N/A	#N/A	#N/A
CNAG_00351	_LDVES[Phospho (STY)]PQDREAR_	-	hypothetical protein	5.31074	5.22628	#N/A	#N/A	#N/A	#N/A
CNAG_00354	_NVPVNSHGQAPGQGQTSQVGS[Phospho (STY)]MGSEHAALR_	-	vacuolar protein 8	1.14767	#N/A	1.46361	#N/A	#N/A	#N/A
CNAG_00354	_NVPVNSHGQAPGQGQTSQVGSMGS[Phospho (STY)]EHAALR_	-	vacuolar protein 8	1.26549	#N/A	1.57924	#N/A	#N/A	#N/A
CNAG_00354	_NVPVNSHGQAPGQGQTSQVGS[Phospho (STY)]MGS[Phospho (STY)]EHAALR_	-	vacuolar protein 8	#N/A	#N/A	1.90579	#N/A	#N/A	#N/A
CNAG_00354	_NVPVNS[Phospho (STY)]HGQAPGQGQTSQVGSMGSEHAALR_	-	vacuolar protein 8	2.02412	#N/A	2.2569	#N/A	#N/A	#N/A
CNAG_00354	_NVPVNSHGQAPGQGQTSQVGS[Phospho (STY)]M[Oxidation (M)]GS[Phospho (STY)]EHAALR_	-	vacuolar protein 8	3.03405	#N/A	3.28902	#N/A	#N/A	#N/A
CNAG_00363	_LPTIQAS[Phospho (STY)]PVTT[Phospho (STY)]PLEGPHRPK_	TCO6	Two-component-like sensor kinase	#N/A	#N/A	1.5919	#N/A	#N/A	#N/A
CNAG_00363	_LPTIQASPVT[Phospho (STY)]T[Phospho (STY)]PLEGPHRPK_	TCO6	Two-component-like sensor kinase	#N/A	#N/A	1.61822	#N/A	#N/A	#N/A
CNAG_00363	_LPTIQAS[Phospho (STY)]PVT[Phospho (STY)]TPLEGPHRPK_	TCO6	Two-component-like sensor kinase	#N/A	#N/A	1.62961	#N/A	#N/A	#N/A
CNAG_00363	_MASTSILNDLAPLS[Phospho (STY)]MPSPER_	TCO6	Two-component-like sensor kinase	#N/A	#N/A	1.64438	#N/A	#N/A	#N/A
CNAG_00363	_[Acetyl (Protein N-term)]SLTPIS[Phospho (STY)]PRPNSNPR_	TCO6	Two-component-like sensor kinase	2.00063	1.9192	2.1162	#N/A	#N/A	#N/A
CNAG_00363	_YSS[Phospho (STY)]ISPNHK_	TCO6	Two-component-like sensor kinase	#N/A	4.52249	3.9984	#N/A	#N/A	#N/A
CNAG_00363	_[Acetyl (Protein N-term)]SLTPISPRPNS[Phospho (STY)]NPR_	TCO6	Two-component-like sensor kinase	#N/A	7.07524	7.22328	#N/A	#N/A	#N/A
CNAG_00363	_S[Phospho (STY)]SPGQKYSSISPNHK_	TCO6	Two-component-like sensor kinase	5.22735	#N/A	#N/A	-6.3773	-5.60982	#N/A
CNAG_00363	_SS[Phospho (STY)]PGQKYSSISPNHK_	TCO6	Two-component-like sensor kinase	6.31329	#N/A	#N/A	#N/A	#N/A	#N/A
CNAG_00363	_S[Phospho (STY)]ESFGPVNPFPVLAAVPTAK_	TCO6	Two-component-like sensor kinase	#N/A	#N/A	#N/A	1.02591	#N/A	#N/A
CNAG_00363	_SES[Phospho (STY)]FGPVNPFPVLAAVPTAK_	TCO6	Two-component-like sensor kinase	#N/A	#N/A	#N/A	1.15009	#N/A	1.05387
CNAG_00365	_WIEGEET[Phospho (STY)]PGATPGGTPK_	-	lysophospholipid acyltransferase	#N/A	#N/A	4.34817	#N/A	4.00805	3.58422
CNAG_00365	_WIEGEETPGAT[Phospho (STY)]PGGTPK_	-	lysophospholipid acyltransferase	8.2014	8.22967	8.06901	#N/A	#N/A	#N/A
CNAG_00365	_WIEGEETPGATPGGT[Phospho (STY)]PK_	-	lysophospholipid acyltransferase	#N/A	#N/A	#N/A	5.51045	5.36978	5.52431
CNAG_00368	_AVIS[Phospho (STY)]PVGSSASLFS[Phospho (STY)]PTSGVAGLPGLRK_	-	vacuolar-sorting protein 53 long isoform	#N/A	#N/A	1.19166	#N/A	#N/A	#N/A
CNAG_00368	_AVIS[Phospho (STY)]PVGS[Phospho (STY)]SASLFSPTSGVAGLPGLRK_	-	vacuolar-sorting protein 53 long isoform	1.37582	1.2773	1.32621	#N/A	#N/A	#N/A
CNAG_00368	_AVISPVGS[Phospho (STY)]SASLFSPTSGVAGLPGLR_	-	vacuolar-sorting protein 53 long isoform	#N/A	#N/A	1.46599	#N/A	#N/A	#N/A
CNAG_00368	_AVISPVGSS[Phospho (STY)]ASLFSPTSGVAGLPGLR_	-	vacuolar-sorting protein 53 long isoform	#N/A	#N/A	1.48307	#N/A	#N/A	#N/A
CNAG_00368	_AVISPVGSSAS[Phospho (STY)]LFSPTSGVAGLPGLR_	-	vacuolar-sorting protein 53 long isoform	#N/A	#N/A	1.48307	#N/A	#N/A	#N/A
CNAG_00368	_AVIS[Phospho (STY)]PVGSSASLFSPTSGVAGLPGLR_	-	vacuolar-sorting protein 53 long isoform	#N/A	#N/A	1.48308	#N/A	#N/A	#N/A
CNAG_00368	_AVISPVGSS[Phospho (STY)]AS[Phospho (STY)]LFSPTSGVAGLPGLRK_	-	vacuolar-sorting protein 53 long isoform	#N/A	1.02315	#N/A	#N/A	#N/A	#N/A
CNAG_00368	_AVIS[Phospho (STY)]PVGSSASLFS[Phospho (STY)]PTSGVAGLPGLR_	-	vacuolar-sorting protein 53 long isoform	1.09652	#N/A	#N/A	#N/A	#N/A	#N/A
CNAG_00374	_SGTVSPAS[Phospho (STY)]EGMEAYVLLTIDHANVK_	-	hypothetical protein	#N/A	#N/A	2.04917	#N/A	#N/A	#N/A
CNAG_00375	_RAS[Phospho (STY)]ESTHSDIEEEQHR_	GCN5	histone acetyltransferase	#N/A	#N/A	2.49376	#N/A	#N/A	#N/A
CNAG_00375	_RASESTHS[Phospho (STY)]DIEEEQHR_	GCN5	histone acetyltransferase	#N/A	5.04782	#N/A	#N/A	#N/A	#N/A
CNAG_00375	_RASES[Phospho (STY)]THSDIEEEQHR_	GCN5	histone acetyltransferase	4.07812	#N/A	#N/A	#N/A	#N/A	#N/A
CNAG_00377	_APT[Phospho (STY)]SNKNASEVYQK_	TOP2	DNA topoisomerase II, variant	6.20504	5.72233	5.84438	#N/A	-1.30561	#N/A
CNAG_00377	_KHPNDS[Phospho (STY)]ISDASS[Phospho (STY)]DIVC[Carbamidomethyl (C)]SPPK_	TOP2	DNA topoisomerase II, variant	11.9754	10.4188	#N/A	#N/A	#N/A	#N/A
CNAG_00383	_HIGLFHQGS[Phospho (STY)]STILAPATPSQR_	APT3	Aminophospholipid translocase, putative	#N/A	7.6197	8.19113	#N/A	#N/A	#N/A
CNAG_00383	_GPDGTIKLY[Phospho (STY)]TK_	APT3	Aminophospholipid translocase, putative	#N/A	8.30191	8.28435	#N/A	#N/A	#N/A
CNAG_00383	_NTGWVY[Phospho (STY)]GVIVNAGHETK_	APT3	Aminophospholipid translocase, putative	3.7001	#N/A	#N/A	#N/A	#N/A	-5.37585
CNAG_00383	_HIGLFHQGSST[Phospho (STY)]ILAPATPSQR_	APT3	Aminophospholipid translocase, putative	#N/A	#N/A	#N/A	4.93164	4.83921	4.71377
CNAG_00386	_VDT[Phospho (STY)]PKKPVFGLPVTVK_	-	translation initiation factor 4G	1.56258	1.1135	1.70197	#N/A	#N/A	#N/A
CNAG_00386	_PVSPPSGTAPFQPAQQPFIHNS[Phospho (STY)]PFPGGSGPNAPQTPLR_	-	translation initiation factor 4G	#N/A	#N/A	4.96526	#N/A	#N/A	#N/A
CNAG_00386	_NISSSSVT[Phospho (STY)]PSFGPSSVFANRK_	-	translation initiation factor 4G	4.09302	4.00686	5.0603	#N/A	#N/A	#N/A
CNAG_00386	_TKPLAAEDDSREEGEEAQFEEEAAGTELS[Phospho (STY)]EGDIK_	-	translation initiation factor 4G	6.49106	#N/A	6.96853	#N/A	#N/A	#N/A
CNAG_00386	_RVPQSSQPSTPAAAPIPIS[Phospho (STY)]ENAWTR_	-	translation initiation factor 4G	8.83614	9.2788	9.24958	#N/A	#N/A	#N/A
CNAG_00387	_SLSPSNEFRSS[Phospho (STY)]PR_	LPI13	hypothetical protein	4.27371	2.76543	4.18733	#N/A	#N/A	3.29706
CNAG_00387	_HFS[Phospho (STY)]PT[Phospho (STY)]SSPKQSEDEPVNLPR_	LPI13	hypothetical protein	#N/A	5.12757	4.35218	#N/A	#N/A	#N/A
CNAG_00387	_AIEES[Phospho (STY)]C[Carbamidomethyl (C)]SDSEEEVEEPILNR_	LPI13	hypothetical protein	#N/A	#N/A	4.69193	#N/A	#N/A	#N/A
CNAG_00387	_SLSPSNEFRS[Phospho (STY)]SPR_	LPI13	hypothetical protein	5.40817	4.48903	5.12374	#N/A	#N/A	#N/A
CNAG_00387	_AIEESC[Carbamidomethyl (C)]S[Phospho (STY)]DSEEEVEEPILNR_	LPI13	hypothetical protein	4.77501	4.70713	5.12487	#N/A	#N/A	#N/A
CNAG_00387	_SLPS[Phospho (STY)]RQSPGGLYK_	LPI13	hypothetical protein	8.06524	6.95499	7.03212	#N/A	#N/A	#N/A
CNAG_00387	_SLPSRQS[Phospho (STY)]PGGLYK_	LPI13	hypothetical protein	8.23543	6.74528	7.19084	#N/A	#N/A	#N/A
CNAG_00387	_TLDNSFGRSPVS[Phospho (STY)]DR_	LPI13	hypothetical protein	5.36269	4.67248	#N/A	#N/A	#N/A	#N/A
CNAG_00387	_S[Phospho (STY)]DSVTSSVSAIQER_	LPI13	hypothetical protein	#N/A	#N/A	#N/A	#N/A	#N/A	1.14763
CNAG_00387	_SDS[Phospho (STY)]VTSSVSAIQER_	LPI13	hypothetical protein	#N/A	#N/A	#N/A	#N/A	#N/A	1.21596
CNAG_00388	_INPFHLLSHPDSSSS[Phospho (STY)]LPPLPSSLQTIAADLGSSDTR_	MSS4	1-phosphatidylinositol-4-phosphate 5-kinase	#N/A	2.95374	3.34236	#N/A	#N/A	#N/A
CNAG_00388	_INPFHLLS[Phospho (STY)]HPDSSSSLPPLPSSLQTIAADLGSSDTR_	MSS4	1-phosphatidylinositol-4-phosphate 5-kinase	#N/A	3.01417	#N/A	#N/A	#N/A	#N/A
CNAG_00390	_TTQNPWAAMPDTITSLSNLTLDGKAPGS[Phospho (STY)]PANDAGTK_	YMR1	myotubularin	#N/A	#N/A	5.15935	#N/A	#N/A	#N/A
CNAG_00390	_GAS[Phospho (STY)]PVS[Phospho (STY)]APSPHATASQSR_	YMR1	myotubularin	1.01854	#N/A	#N/A	#N/A	#N/A	#N/A
CNAG_00390	_GAS[Phospho (STY)]PVSAPS[Phospho (STY)]PHATASQSR_	YMR1	myotubularin	1.22627	#N/A	#N/A	#N/A	#N/A	#N/A
CNAG_00391	_GQGVKS[Phospho (STY)]DDDEPAGQALDTR_	-	hypothetical protein	#N/A	#N/A	#N/A	#N/A	#N/A	4.38438
CNAG_00392	_TDPC[Carbamidomethyl (C)]T[Phospho (STY)]PAGELDNAYEQTAAR_	-	kelch repeat-containing protein, variant	#N/A	#N/A	4.87617	#N/A	#N/A	#N/A
CNAG_00393	_IY[Phospho (STY)]EAHVGISSPNMR_	-	1,4-alpha-glucan-branching enzyme	7.16354	6.46182	6.77787	#N/A	-5.24538	#N/A
CNAG_00396	_APIVGPSTSTS[Phospho (STY)]LSTVPVQDGTLPLTPGAQGMLAGTTDGHR_	PKA1	AGC/PKA protein kinase	1.26694	1.06625	1.77517	#N/A	#N/A	#N/A
CNAG_00396	_APIVGPSTSTSLSTVPVQDGTLPLT[Phospho (STY)]PGAQGMLAGTTDGHR_	PKA1	AGC/PKA protein kinase	2.11463	#N/A	2.10301	#N/A	#N/A	#N/A
CNAG_00396	_QVQS[Phospho (STY)]PVSR_	PKA1	AGC/PKA protein kinase	6.03311	#N/A	4.50556	#N/A	#N/A	#N/A
CNAG_00396	_ANSQAQQAYSSQDHSPMEGIQS[Phospho (STY)]DSTHIQQPMATQK_	PKA1	AGC/PKA protein kinase	#N/A	#N/A	5.98926	#N/A	#N/A	#N/A
CNAG_00396	_ANSQAQQAY[Phospho (STY)]SSQDHSPMEGIQSDSTHIQQPMATQK_	PKA1	AGC/PKA protein kinase	7.18736	6.95584	6.52361	#N/A	#N/A	#N/A
CNAG_00396	_ANSQAQQAYSSQDHSPMEGIQSDS[Phospho (STY)]THIQQPMATQK_	PKA1	AGC/PKA protein kinase	#N/A	#N/A	6.98657	#N/A	#N/A	#N/A
CNAG_00396	_ANSQAQQAYSSQDHS[Phospho (STY)]PMEGIQSDSTHIQQPMATQK_	PKA1	AGC/PKA protein kinase	#N/A	6.51193	7.30206	#N/A	#N/A	#N/A
CNAG_00396	_KQQSSTSPGKT[Phospho (STY)]QQVPNSPSS[Phospho (STY)]VLAK_	PKA1	AGC/PKA protein kinase	#N/A	5.74234	#N/A	#N/A	-1.54535	#N/A
CNAG_00398	_LPSPTGPFPSLDPPSPS[Phospho (STY)]NSFANLTIAQSSPTPSWTVQHAR_	-	hypothetical protein	-7.13331	1.55248	1.0239	#N/A	#N/A	#N/A
CNAG_00398	_LPSPTGPFPSLDPPSPSNS[Phospho (STY)]FANLTIAQSSPTPSWTVQHAR_	-	hypothetical protein	#N/A	1.59546	1.19434	#N/A	#N/A	#N/A
CNAG_00398	_QKLPSPT[Phospho (STY)]GPFPSLDPPSPSNSFANLTIAQSSPTPSWTVQHAR_	-	hypothetical protein	#N/A	5.25512	4.97299	#N/A	#N/A	#N/A
CNAG_00398	_QKLPSPTGPFPSLDPPSPSNSFANLTIAQS[Phospho (STY)]SPTPSWTVQHAR_	-	hypothetical protein	5.59204	5.28264	5.02464	#N/A	#N/A	#N/A
CNAG_00398	_DDSSSKSPSNNMQSS[Phospho (STY)]APAPALPPR_	-	hypothetical protein	6.82801	7.07549	6.97009	#N/A	#N/A	#N/A
CNAG_00398	_DDSSSKSPSNNMQS[Phospho (STY)]SAPAPALPPR_	-	hypothetical protein	7.44028	7.58417	7.57398	#N/A	#N/A	#N/A
CNAG_00398	_LPSPTGPFPSLDPPSPSNSFANLT[Phospho (STY)]IAQSSPTPSWTVQHAR_	-	hypothetical protein	#N/A	1.31596	#N/A	#N/A	#N/A	#N/A
CNAG_00399	_DAIPTKS[Phospho (STY)]PPK_	-	transformer-2-beta isoform 3	5.75554	#N/A	4.6295	#N/A	#N/A	#N/A
CNAG_00399	_RDELMTFDSYAVRS[Phospho (STY)]PS[Phospho (STY)]PSDSR_	-	transformer-2-beta isoform 3	#N/A	#N/A	5.30259	#N/A	#N/A	#N/A
CNAG_00399	_RIS[Phospho (STY)]LS[Phospho (STY)]PR_	-	transformer-2-beta isoform 3	7.02652	7.04149	7.19392	#N/A	#N/A	#N/A
CNAG_00400	_TDMDMALDTIVPES[Phospho (STY)]LPWEHTDEGPDDSVSHLK_	-	secondary thiamine-phosphate synthase enzyme, variant	#N/A	#N/A	4.40619	#N/A	#N/A	#N/A
CNAG_00402	_GPPSAVSSASAS[Phospho (STY)]K_	-	translation initiation factor 4G	1.1533	#N/A	1.03402	#N/A	#N/A	#N/A
CNAG_00402	_NIS[Phospho (STY)]SGGTAPSFGPTSIFNTR_	-	translation initiation factor 4G	1.18608	#N/A	1.08516	#N/A	#N/A	#N/A
CNAG_00402	_NISSGGT[Phospho (STY)]APSFGPTSIFNTR_	-	translation initiation factor 4G	1.15433	#N/A	1.11682	#N/A	#N/A	#N/A
CNAG_00402	_NISSGGTAPS[Phospho (STY)]FGPTSIFNTR_	-	translation initiation factor 4G	#N/A	#N/A	1.12041	#N/A	#N/A	#N/A
CNAG_00402	_GKAGTPT[Phospho (STY)]NVTPPMSR_	-	translation initiation factor 4G	#N/A	#N/A	1.23713	#N/A	#N/A	#N/A
CNAG_00402	_APAQVPLGS[Phospho (STY)]SPSRPAMS[Phospho (STY)]PPQLHQQPIPHIR_	-	translation initiation factor 4G	#N/A	1.04454	1.41084	#N/A	#N/A	#N/A
CNAG_00402	_T[Phospho (STY)]PSSLSGLPSLGISGSR_	-	translation initiation factor 4G	#N/A	#N/A	1.46581	#N/A	#N/A	#N/A
CNAG_00402	_APAQVPLGSSPS[Phospho (STY)]RPAMS[Phospho (STY)]PPQLHQQPIPHIR_	-	translation initiation factor 4G	1.29676	1.20428	1.62326	#N/A	#N/A	#N/A
CNAG_00402	_APAQVPLGSS[Phospho (STY)]PSRPAMS[Phospho (STY)]PPQLHQQPIPHIR_	-	translation initiation factor 4G	1.31767	1.25862	1.64417	#N/A	#N/A	#N/A
CNAG_00402	_QPS[Phospho (STY)]SANMFSALNDTQENDPVSAERR_	-	translation initiation factor 4G	#N/A	#N/A	1.99932	#N/A	#N/A	#N/A
CNAG_00402	_QPSSANMFS[Phospho (STY)]ALNDTQENDPVSAERR_	-	translation initiation factor 4G	#N/A	#N/A	2.06141	#N/A	#N/A	#N/A
CNAG_00402	_PINDLSSITYPATLKS[Phospho (STY)]PDPR_	-	translation initiation factor 4G	#N/A	#N/A	3.73676	#N/A	#N/A	#N/A
CNAG_00402	_AVS[Phospho (STY)]S[Phospho (STY)]GAHT[Phospho (STY)]PESAAQQSK_	-	translation initiation factor 4G	5.94395	#N/A	5.99283	#N/A	#N/A	#N/A
CNAG_00402	_AGTPT[Phospho (STY)]NVTPPMSR_	-	translation initiation factor 4G	#N/A	7.31044	6.1159	#N/A	#N/A	#N/A
CNAG_00402	_QPSS[Phospho (STY)]ANMFS[Phospho (STY)]ALNDTQENDPVSAER_	-	translation initiation factor 4G	#N/A	7.22637	6.4602	#N/A	#N/A	#N/A
CNAG_00402	_ASLSNRTPSSLS[Phospho (STY)]GLPSLGISGSR_	-	translation initiation factor 4G	#N/A	#N/A	#N/A	#N/A	3.36468	#N/A
CNAG_00402	_ELLS[Phospho (STY)]TPVT[Phospho (STY)]PVAVSPAGSPALGAGLPAKPVAAISGAK_	-	translation initiation factor 4G	#N/A	#N/A	#N/A	1.11806	#N/A	#N/A
CNAG_00402	_ELLST[Phospho (STY)]PVT[Phospho (STY)]PVAVS[Phospho (STY)]PAGS[Phospho (STY)]PALGAGLPAKPVAAISGAK_	-	translation initiation factor 4G	#N/A	#N/A	#N/A	#N/A	1.2027	#N/A
CNAG_00402	_NQSGANTPSQDGAGLSNLTSASNSTAIS[Phospho (STY)]IR_	-	translation initiation factor 4G	#N/A	#N/A	#N/A	#N/A	4.40781	6.10745
CNAG_00402	_RELLS[Phospho (STY)]TPVT[Phospho (STY)]PVAVSPAGSPALGAGLPAKPVAAISGAK_	-	translation initiation factor 4G	#N/A	#N/A	#N/A	1.17881	#N/A	1.0726
CNAG_00404	_RTSSNLSSS[Phospho (STY)]PAANSSPSSLSMQR_	-	RING zinc finger protein	-3.8813	#N/A	-6.49006	#N/A	6.0308	#N/A
CNAG_00404	_RQS[Phospho (STY)]LEELR_	-	RING zinc finger protein	-3.05987	#N/A	-6.34573	4.53531	3.52287	#N/A
CNAG_00405	_LFHDESSTDPDPFQSFAHQQPPT[Phospho (STY)]PQTTEDSNTIK_	KIC1	ste/ste20/ysk protein kinase	#N/A	4.60682	4.69705	#N/A	#N/A	#N/A
CNAG_00405	_DLLKLS[Phospho (STY)]PAVPDMPDLLPPSPSVANTPHK_	KIC1	ste/ste20/ysk protein kinase	5.99986	6.45211	6.68334	#N/A	#N/A	#N/A
CNAG_00405	_LFHDESSTDPDPFQSFAHQQPPTPQTTEDSNT[Phospho (STY)]IK_	KIC1	ste/ste20/ysk protein kinase	#N/A	3.17416	#N/A	#N/A	#N/A	#N/A
CNAG_00405	_LSPAVPDMPDLLPPSPS[Phospho (STY)]VANTPHK_	KIC1	ste/ste20/ysk protein kinase	#N/A	#N/A	#N/A	#N/A	1.42199	#N/A
CNAG_00405	_LSPAVPDMPDLLPPSPSVANT[Phospho (STY)]PHK_	KIC1	ste/ste20/ysk protein kinase	#N/A	#N/A	#N/A	#N/A	1.5123	#N/A
CNAG_00406	_ET[Phospho (STY)]LDEGPSYMLTIPPATASR_	-	hypothetical protein	7.07363	8.16916	8.17806	#N/A	#N/A	#N/A
CNAG_00406	_RISLS[Phospho (STY)]AGGVPISSSASQNSIDLPRPQPIVR_	-	hypothetical protein	#N/A	5.83536	#N/A	#N/A	#N/A	#N/A
CNAG_00406	_LPDT[Phospho (STY)]PNGSR_	-	hypothetical protein	4.00671	#N/A	#N/A	#N/A	#N/A	#N/A
CNAG_00406	_VQGS[Phospho (STY)]PVKVGGPMANHPTILSSSIEGGGDSSISPDALHVGPHYEK_	-	hypothetical protein	#N/A	#N/A	#N/A	#N/A	#N/A	3.75926
CNAG_00413	_HAVLSDLLS[Phospho (STY)]DDLLEGVVEESKK_	OFD1	putative oxidoreductase	#N/A	#N/A	4.95805	#N/A	#N/A	#N/A
CNAG_00415	_ETLAVAESEPLKPALSPS[Phospho (STY)]PPLQSSKPPSR_	CDC2801	CMGC/CDK protein kinase	#N/A	#N/A	4.58384	#N/A	#N/A	#N/A
CNAG_00415	_IRQSHGDVSPPAS[Phospho (STY)]VGLQMPK_	CDC2801	CMGC/CDK protein kinase	#N/A	#N/A	#N/A	#N/A	4.6745	#N/A
CNAG_00418	_RDGS[Phospho (STY)]MGWLRPDSK_	-	S-adenosylmethionine synthase	#N/A	#N/A	#N/A	#N/A	5.86215	#N/A
CNAG_00423	_IVRDVNPNLS[Phospho (STY)]PDEELGDLAAAEAAVNAK_	-	kinetochore protein Spc24, fungi type	4.47221	#N/A	#N/A	#N/A	#N/A	#N/A
CNAG_00423	_PTS[Phospho (STY)]HPSPAEHEANVR_	-	kinetochore protein Spc24, fungi type	#N/A	#N/A	#N/A	#N/A	#N/A	4.47892
CNAG_00424	_SPPTTSSIQS[Phospho (STY)]PNSAGGPPK_	-	choline-phosphate cytidylyltransferase	#N/A	1.42051	1.32619	#N/A	#N/A	#N/A
CNAG_00424	_SPPTTSSIQSPNS[Phospho (STY)]AGGPPK_	-	choline-phosphate cytidylyltransferase	3.90218	3.08755	3.00404	#N/A	#N/A	#N/A
CNAG_00424	_ATYVRPSDVPVAPS[Phospho (STY)]VALDEC[Carbamidomethyl (C)]ARSPPTTSSIQSPNSAGGPPK_	-	choline-phosphate cytidylyltransferase	#N/A	#N/A	6.27239	#N/A	-1.35006	#N/A
CNAG_00424	_S[Phospho (STY)]PPTTSSIQSPNSAGGPPK_	-	choline-phosphate cytidylyltransferase	#N/A	8.36325	7.98599	#N/A	#N/A	#N/A
CNAG_00424	_SPPTTSS[Phospho (STY)]IQSPNSAGGPPK_	-	choline-phosphate cytidylyltransferase	8.64504	7.70373	8.05049	#N/A	#N/A	#N/A
CNAG_00424	_ASQIGFSAADY[Phospho (STY)]PAVPTPK_	-	choline-phosphate cytidylyltransferase	#N/A	5.51116	#N/A	#N/A	#N/A	#N/A
CNAG_00424	_MPPPALPPHSSSGSPGTT[Phospho (STY)]QAGRR_	-	choline-phosphate cytidylyltransferase	7.73717	7.6883	#N/A	#N/A	#N/A	#N/A
CNAG_00424	_NGHPELLAADVDWDS[Phospho (STY)]SAS[Phospho (STY)]VEK_	-	choline-phosphate cytidylyltransferase	#N/A	#N/A	#N/A	#N/A	3.50949	#N/A
CNAG_00424	_NGHPELLAADVDWDSS[Phospho (STY)]AS[Phospho (STY)]VEKR_	-	choline-phosphate cytidylyltransferase	#N/A	#N/A	#N/A	#N/A	1.34179	#N/A
CNAG_00426	_VLS[Phospho (STY)]PPPHIVGQIVEMGFAPAQAR_	-	UBA/TS-N domain-containing protein	#N/A	#N/A	1.12266	#N/A	#N/A	#N/A
CNAG_00426	_PAPAVSY[Phospho (STY)]SPSPSPAPPAKPAAAATAHSDAFSSLIAVPAAR_	-	UBA/TS-N domain-containing protein	2.6059	2.4772	2.89754	#N/A	#N/A	#N/A
CNAG_00426	_PAPAVSYS[Phospho (STY)]PSPSPAPPAKPAAAATAHSDAFSSLIAVPAAR_	-	UBA/TS-N domain-containing protein	2.63423	2.53626	2.90426	#N/A	#N/A	#N/A
CNAG_00426	_SPAVSQPTIS[Phospho (STY)]RPSPS[Phospho (STY)]PKPQPK_	-	UBA/TS-N domain-containing protein	6.38078	6.82738	6.81913	#N/A	#N/A	#N/A
CNAG_00426	_SPAVSQPTISRPS[Phospho (STY)]PS[Phospho (STY)]PKPQPK_	-	UBA/TS-N domain-containing protein	8.43411	8.02797	8.33825	#N/A	#N/A	3.08913
CNAG_00427	_C[Carbamidomethyl (C)]DVLS[Phospho (STY)]EDQMGDNPR_	PTC5	type 2C protein Phosphatase	4.57896	#N/A	#N/A	#N/A	#N/A	#N/A
CNAG_00429	_HT[Phospho (STY)]SLGQTER_	-	tRNA-dihydrouridine synthase 1	#N/A	#N/A	#N/A	5.70386	#N/A	5.85043
CNAG_00429	_MFDTPNITTAPASS[Phospho (STY)]VPGTVLFSR_	-	tRNA-dihydrouridine synthase 1	#N/A	#N/A	#N/A	2.86827	3.17225	#N/A
CNAG_00436	_ADEGSS[Phospho (STY)]IGGGELERDSQEVGR_	-	palmitoyltransferase akr1	#N/A	#N/A	#N/A	7.92207	7.14576	7.64757
CNAG_00441	_NIVLNTPFLS[Phospho (STY)]SPMDTVTEDR_	IMD1	inosine-5'-monophosphate dehydrogenase	4.48181	4.90044	4.70243	#N/A	#N/A	#N/A
CNAG_00441	_TASAQLEGGVHGLNSY[Phospho (STY)]TKR_	IMD1	inosine-5'-monophosphate dehydrogenase	6.58394	#N/A	6.56568	#N/A	#N/A	#N/A
CNAG_00441	_LPIVDS[Phospho (STY)]NGHLVSLVAR_	IMD1	inosine-5'-monophosphate dehydrogenase	#N/A	#N/A	#N/A	#N/A	1.84971	2.49689
CNAG_00441	_LPIVDSNGHLVS[Phospho (STY)]LVAR_	IMD1	inosine-5'-monophosphate dehydrogenase	#N/A	#N/A	#N/A	#N/A	4.19694	#N/A
CNAG_00441	_TASAQLEGGVHGLNS[Phospho (STY)]YTK_	IMD1	inosine-5'-monophosphate dehydrogenase	#N/A	#N/A	#N/A	#N/A	3.80554	#N/A
CNAG_00445	_SSPSVAESVPHPAPHSDLEPS[Phospho (STY)]ITSLGK_	NHP6B01	nonhistone chromosomal protein	#N/A	3.83723	-2.61633	-6.02341	#N/A	#N/A
CNAG_00445	_S[Phospho (STY)]IPHYDASLEVDDFR_	NHP6B01	nonhistone chromosomal protein	#N/A	2.32946	2.28496	#N/A	#N/A	#N/A
CNAG_00445	_SIPHY[Phospho (STY)]DASLEVDDFR_	NHP6B01	nonhistone chromosomal protein	#N/A	5.75809	5.72689	#N/A	#N/A	#N/A
CNAG_00451	_EANIT[Phospho (STY)]SPPPPK_	-	cytoplasmic protein	#N/A	#N/A	5.12681	#N/A	#N/A	#N/A
CNAG_00451	_IPS[Phospho (STY)]GIEIDLQEGREVEIEADWDR_	-	cytoplasmic protein	#N/A	#N/A	#N/A	#N/A	9.35673	10.0354
CNAG_00455	_PAIHAAAPVEASSFY[Phospho (STY)]TSPIARPSNPLAGMSK_	UBP16	ubiquitin carboxyl-terminal hydrolase Ubp16	#N/A	6.04348	#N/A	#N/A	#N/A	#N/A
CNAG_00455	_PAIHAAAPVEASSFYTS[Phospho (STY)]PIARPSNPLAGMSK_	UBP16	ubiquitin carboxyl-terminal hydrolase Ubp16	#N/A	6.1432	#N/A	#N/A	#N/A	#N/A
CNAG_00458	_SPS[Phospho (STY)]PPMSTAK_	-	hypothetical protein, variant	4.95268	5.84953	4.96521	#N/A	#N/A	#N/A
CNAG_00460	_SPLHTSTLTRPSSPSS[Phospho (STY)]NSGAEVVLT[Phospho (STY)]PTTMAEER_	LIV1	virulence related protein of unknown function	4.86867	5.41415	5.79925	#N/A	#N/A	#N/A
CNAG_00460	_SPLHTSTLTRPSS[Phospho (STY)]PSSNSGAEVVLT[Phospho (STY)]PTTMAEER_	LIV1	virulence related protein of unknown function	#N/A	6.66109	7.06325	#N/A	#N/A	#N/A
CNAG_00460	_SPSATHST[Phospho (STY)]TQVNVDDGLTPELR_	LIV1	virulence related protein of unknown function	7.7654	7.37925	7.16884	#N/A	#N/A	#N/A
CNAG_00460	_SPLHTSTLT[Phospho (STY)]RPSSPSSNSGAEVVLTPTTM[Oxidation (M)]AEER_	LIV1	virulence related protein of unknown function	7.38761	7.64721	7.57912	#N/A	#N/A	#N/A
CNAG_00461	_SVTVDLSC[Carbamidomethyl (C)]GTSNALIS[Phospho (STY)]VSEPEK_	-	protein kinase C substrate 80K-H	#N/A	#N/A	#N/A	#N/A	5.67332	6.81324
CNAG_00466	_ESLTDEIEAVLFVAREVMVY[Phospho (STY)]QIPPR_	-	adaptin ear-binding coat-associated protein 2	#N/A	#N/A	#N/A	#N/A	6.44494	#N/A
CNAG_00466	_KPSPSQT[Phospho (STY)]PSSGGGGGGGGLFSLPPPPPPGR_	-	adaptin ear-binding coat-associated protein 2	#N/A	#N/A	#N/A	#N/A	1.13364	#N/A
CNAG_00469	_GNLHSGPRS[Phospho (STY)]EEGMR_	-	endoplasmic reticulum protein	#N/A	#N/A	#N/A	#N/A	#N/A	3.92513
CNAG_00469	_STGLASSTNLAPVIGS[Phospho (STY)]ETELSKR_	-	endoplasmic reticulum protein	#N/A	#N/A	#N/A	#N/A	#N/A	5.66288
CNAG_00469	_STGLASSTNLAPVIGSET[Phospho (STY)]ELSKR_	-	endoplasmic reticulum protein	#N/A	#N/A	#N/A	4.76594	#N/A	4.45732
CNAG_00471	_NLPPATST[Phospho (STY)]PASPSK_	-	mitochondrial protein	3.8305	-2.64559	#N/A	#N/A	#N/A	#N/A
CNAG_00480	_RAPS[Phospho (STY)]PVVAASSLATPDLSTPVSSGPYITPPPSLR_	-	hypothetical protein	#N/A	#N/A	1.73794	#N/A	#N/A	#N/A
CNAG_00482	_GNLPGT[Phospho (STY)]PNAQAHAEAADK_	-	26S proteasome regulatory subunit N10	#N/A	2.06629	2.29534	#N/A	#N/A	#N/A
CNAG_00482	_GNLPGTPNAQAHAEAADKAGAIAESGTGST[Phospho (STY)]FISGNPLTGNR_	-	26S proteasome regulatory subunit N10	5.13825	5.19261	5.84912	#N/A	#N/A	#N/A
CNAG_00482	_GNLPGT[Phospho (STY)]PNAQAHAEAADKAGAIAESGTGSTFISGNPLTGNR_	-	26S proteasome regulatory subunit N10	6.83769	6.81661	7.40254	#N/A	#N/A	#N/A
CNAG_00483	_GYLFTTS[Phospho (STY)]AEREIVR_	ACT1	actin	#N/A	#N/A	6.31934	#N/A	#N/A	#N/A
CNAG_00490	_MSEEILS[Phospho (STY)]NPESADC[Carbamidomethyl (C)]LTPMGITSENVAK_	-	acetyl-CoA acyltransferase	#N/A	#N/A	#N/A	4.37571	#N/A	4.18189
CNAG_00496	_[Acetyl (Protein N-term)]MDDPWADAPAS[Phospho (STY)]PLPK_	-	hypothetical protein	#N/A	#N/A	1.27597	#N/A	#N/A	#N/A
CNAG_00496	_RPQS[Phospho (STY)]VSGGMT[Phospho (STY)]PK_	-	hypothetical protein	1.18917	#N/A	1.61896	#N/A	#N/A	#N/A
CNAG_00496	_RPQS[Phospho (STY)]VS[Phospho (STY)]GGMTPK_	-	hypothetical protein	#N/A	#N/A	5.76941	#N/A	#N/A	#N/A
CNAG_00497	_AGSSSPSTSGVIDSPS[Phospho (STY)]K_	-	hypothetical protein	#N/A	2.45695	1.19689	#N/A	#N/A	#N/A
CNAG_00497	_AGSSSPSTSGVIDSPSKS[Phospho (STY)]ISAR_	-	hypothetical protein	6.61599	6.96422	#N/A	#N/A	#N/A	#N/A
CNAG_00497	_AGSSSPSTSGVIDSPS[Phospho (STY)]KSISAR_	-	hypothetical protein	8.91013	9.41792	#N/A	#N/A	#N/A	#N/A
CNAG_00498	_VNLAASTEAPSTPT[Phospho (STY)]RAPSR_	CDC14	cell division cycle protein 14	#N/A	#N/A	#N/A	5.1985	5.07809	#N/A
CNAG_00500	_NFDEVIT[Phospho (STY)]EDEGVINAADGTRVEAIEPK_	PTC1	Protein phosphatase	#N/A	#N/A	#N/A	#N/A	3.50901	#N/A
CNAG_00506	_LITAVPIPGS[Phospho (STY)]PASPKSTTPPPSFSR_	-	hypothetical protein	7.0717	#N/A	#N/A	#N/A	#N/A	#N/A
CNAG_00508	_VQPTQPSLVSSPPPPQS[Phospho (STY)]QYASPYAAQPPLTAQVGR_	VPS17	vacuolar protein sorting-associated protein vps17	#N/A	#N/A	1.23019	#N/A	#N/A	#N/A
CNAG_00508	_VQPTQPS[Phospho (STY)]LVSSPPPPQSQYASPYAAQPPLTAQVGR_	VPS17	vacuolar protein sorting-associated protein vps17	#N/A	#N/A	1.29707	#N/A	#N/A	#N/A
CNAG_00508	_VQPTQPSLVS[Phospho (STY)]SPPPPQSQYASPYAAQPPLTAQVGR_	VPS17	vacuolar protein sorting-associated protein vps17	#N/A	1.28938	1.3053	#N/A	#N/A	#N/A
CNAG_00508	_IPT[Phospho (STY)]SPPTTGFPVADGTQSMFLPSGGNGGMQR_	VPS17	vacuolar protein sorting-associated protein vps17	#N/A	1.78298	2.03778	#N/A	#N/A	#N/A
CNAG_00508	_IPTS[Phospho (STY)]PPTTGFPVADGTQSMFLPSGGNGGMQR_	VPS17	vacuolar protein sorting-associated protein vps17	#N/A	2.39944	2.7032	#N/A	#N/A	#N/A
CNAG_00508	_IPTSPPT[Phospho (STY)]TGFPVADGTQSMFLPSGGNGGMQR_	VPS17	vacuolar protein sorting-associated protein vps17	#N/A	2.39946	2.70322	#N/A	#N/A	#N/A
CNAG_00508	_IPTSPPTT[Phospho (STY)]GFPVADGTQSMFLPSGGNGGMQR_	VPS17	vacuolar protein sorting-associated protein vps17	#N/A	2.39946	2.70322	#N/A	#N/A	#N/A
CNAG_00508	_IPTSPPTTGFPVADGTQS[Phospho (STY)]MFLPSGGNGGMQR_	VPS17	vacuolar protein sorting-associated protein vps17	2.49442	2.6601	2.94075	#N/A	#N/A	#N/A
CNAG_00508	_GPAAPGMQGMQGMGQSMFVPSQS[Phospho (STY)]QSQASFR_	VPS17	vacuolar protein sorting-associated protein vps17	#N/A	#N/A	#N/A	#N/A	1.3092	#N/A
CNAG_00508	_SFIES[Phospho (STY)]NFGYSPIPPPTAK_	VPS17	vacuolar protein sorting-associated protein vps17	#N/A	#N/A	#N/A	1.99028	#N/A	#N/A
CNAG_00513	_AIETPEGGVS[Phospho (STY)]YNPSAESHAK_	-	nucleolar protein 53	#N/A	#N/A	1.04887	#N/A	4.87456	#N/A
CNAG_00513	_KPLLSS[Phospho (STY)]AEK_	-	nucleolar protein 53	#N/A	#N/A	1.26818	#N/A	1.61883	2.06286
CNAG_00514	_GFLSWALSETS[Phospho (STY)]PGSTIVK_	-	hypothetical protein	#N/A	#N/A	#N/A	#N/A	3.58264	#N/A
CNAG_00520	_QDAEHHT[Phospho (STY)]PKSVASSLR_	-	hypothetical protein	1.35246	1.20296	1.00621	#N/A	#N/A	#N/A
CNAG_00520	_VPAASS[Phospho (STY)]DNDDGGWGGEPTR_	-	hypothetical protein	#N/A	#N/A	1.30165	#N/A	#N/A	1.72716
CNAG_00520	_TVQNSLLFAS[Phospho (STY)]PVER_	-	hypothetical protein	#N/A	#N/A	1.38488	#N/A	#N/A	#N/A
CNAG_00520	_HIS[Phospho (STY)]PAPSIVSAGYLDGR_	-	hypothetical protein	1.36825	1.19266	1.44635	#N/A	#N/A	#N/A
CNAG_00520	_ESSAPPSQGASSPQPFAQPFT[Phospho (STY)]PR_	-	hypothetical protein	4.54835	#N/A	4.74281	#N/A	#N/A	#N/A
CNAG_00520	_QPSESGFGGGLQGGY[Phospho (STY)]SGGGGR_	-	hypothetical protein	#N/A	5.76374	6.25299	#N/A	#N/A	#N/A
CNAG_00520	_SVASSLRESSAPPSQGASS[Phospho (STY)]PQPFAQPFTPR_	-	hypothetical protein	4.16653	3.36901	#N/A	#N/A	#N/A	#N/A
CNAG_00520	_TVQNSLLFASPVERHISPAPS[Phospho (STY)]IVSAGYLDGR_	-	hypothetical protein	6.29328	#N/A	#N/A	#N/A	#N/A	#N/A
CNAG_00520	_GKEDDGGWGGNAGSNDGEWGGGPEAT[Phospho (STY)]PK_	-	hypothetical protein	#N/A	#N/A	#N/A	#N/A	#N/A	1.18498
CNAG_00521	_S[Phospho (STY)]ADTSPPDIPR_	-	hypothetical protein	#N/A	#N/A	6.21884	#N/A	#N/A	#N/A
CNAG_00521	_[Acetyl (Protein N-term)]SSEGAPVVLY[Phospho (STY)]DIERSADTS[Phospho (STY)]PPDIPR_	-	hypothetical protein	#N/A	#N/A	#N/A	#N/A	3.2166	#N/A
CNAG_00522	_SGIGGDGHAAPQSGS[Phospho (STY)]PDAHGARAPVKAGPDEETNAAK_	-	C2 domain-containing protein, variant	#N/A	-1.88973	-2.03183	5.18022	#N/A	5.10547
CNAG_00522	_RHALEAY[Phospho (STY)]DHIEGEAEVAR_	-	C2 domain-containing protein, variant	#N/A	6.5975	5.79735	#N/A	#N/A	5.71217
CNAG_00523	_DKLS[Phospho (STY)]DDNRAEIQR_	-	hypothetical protein, variant	6.9684	7.44282	7.46179	#N/A	#N/A	#N/A
CNAG_00527	_AGGGRYVES[Phospho (STY)]VR_	-	translation initiation factor eIF-2B subunit epsilon	#N/A	5.73558	5.4765	#N/A	#N/A	#N/A
CNAG_00532	_GGEESLPS[Phospho (STY)]SVDNIVPSRR_	-	hypothetical protein	#N/A	#N/A	3.94433	#N/A	#N/A	#N/A
CNAG_00532	_GGEESLPSSVDNIVPS[Phospho (STY)]R_	-	hypothetical protein	4.29798	#N/A	4.84867	#N/A	#N/A	#N/A
CNAG_00532	_GGEESLPS[Phospho (STY)]S[Phospho (STY)]VDNIVPSRR_	-	hypothetical protein	#N/A	#N/A	5.16553	#N/A	#N/A	#N/A
CNAG_00532	_GGEESLPSS[Phospho (STY)]VDNIVPSRR_	-	hypothetical protein	#N/A	#N/A	6.21403	#N/A	#N/A	#N/A
CNAG_00539	_IPTS[Phospho (STY)]TSHR_	-	membrane transporter	#N/A	#N/A	4.39899	2.20429	#N/A	#N/A
CNAG_00539	_AVSLTDSDGDHDHIT[Phospho (STY)]R_	-	membrane transporter	4.57457	#N/A	4.43783	#N/A	#N/A	#N/A
CNAG_00539	_IPT[Phospho (STY)]STSHR_	-	membrane transporter	#N/A	#N/A	5.34988	#N/A	#N/A	#N/A
CNAG_00539	_AVSLTDS[Phospho (STY)]DGDHDHITR_	-	membrane transporter	5.98967	6.0561	5.95389	#N/A	#N/A	#N/A
CNAG_00539	_AVS[Phospho (STY)]LTDS[Phospho (STY)]DGDHDHITR_	-	membrane transporter	6.03456	6.0661	6.54237	#N/A	1.77501	#N/A
CNAG_00539	_AGFIPADDVDHGLQPMRS[Phospho (STY)]R_	-	membrane transporter	7.62878	#N/A	8.36315	#N/A	#N/A	#N/A
CNAG_00539	_AVS[Phospho (STY)]LTDSDGDHDHITR_	-	membrane transporter	#N/A	#N/A	#N/A	#N/A	1.78782	#N/A
CNAG_00545	_EISPIWAQS[Phospho (STY)]NNHPADGVIGMGSLSMAER_	SCC2	cohesin loading factor subunit SCC2	6.50839	6.44671	5.85498	#N/A	#N/A	#N/A
CNAG_00545	_IPMHLAT[Phospho (STY)]PQQPR_	SCC2	cohesin loading factor subunit SCC2	#N/A	-2.01228	#N/A	#N/A	5.47329	5.08437
CNAG_00545	_GMSPAKRPS[Phospho (STY)]IPSTAMR_	SCC2	cohesin loading factor subunit SCC2	#N/A	6.01621	#N/A	#N/A	#N/A	#N/A
CNAG_00545	_SM[Oxidation (M)]TGSVS[Phospho (STY)]PLKPVIASK_	SCC2	cohesin loading factor subunit SCC2	#N/A	#N/A	#N/A	#N/A	4.69348	4.96837
CNAG_00547	_KPSATS[Phospho (STY)]LSELAEESKESEASTSSPNWR_	-	hypothetical protein	5.93049	6.01377	6.05443	#N/A	#N/A	#N/A
CNAG_00547	_MPSPT[Phospho (STY)]SPSYQPR_	-	hypothetical protein	#N/A	6.41012	6.81754	#N/A	#N/A	#N/A
CNAG_00547	_GISDAREEC[Carbamidomethyl (C)]DVS[Phospho (STY)]PFELPSSVSLR_	-	hypothetical protein	4.98457	#N/A	#N/A	#N/A	#N/A	#N/A
CNAG_00547	_S[Phospho (STY)]MSFMSLK_	-	hypothetical protein	#N/A	#N/A	#N/A	6.1464	6.90274	6.52197
CNAG_00547	_SNSTASLTGT[Phospho (STY)]K_	-	hypothetical protein	#N/A	#N/A	#N/A	#N/A	#N/A	5.24455
CNAG_00547	_WSDKMPSPTSPS[Phospho (STY)]YQPR_	-	hypothetical protein	#N/A	#N/A	#N/A	#N/A	#N/A	4.69677
CNAG_00547	_WSDKMPSPTSPSY[Phospho (STY)]QPR_	-	hypothetical protein	#N/A	#N/A	#N/A	#N/A	3.02847	#N/A
CNAG_00554	_KHTDNANPQDESSNLS[Phospho (STY)]HDNSSEPLMPILSQSK_	ISC1	inositol phosphorylsphingolipid-phospholipase C	#N/A	#N/A	#N/A	#N/A	#N/A	1.03602
CNAG_00556	_SGSALPNVS[Phospho (STY)]NQAMVGVSAPS[Phospho (STY)]PLPQSR_	CCK1	Casein kinase I	5.92619	#N/A	5.7051	#N/A	#N/A	#N/A
CNAG_00558	_STSVNKSWSHTAMTS[Phospho (STY)]SVPPSAWQSR_	-	hypothetical protein	#N/A	6.8187	#N/A	-9.49005	-1.0631	#N/A
CNAG_00558	_RSSVGADGLALDQAS[Phospho (STY)]GGISDDIR_	-	hypothetical protein	6.25583	#N/A	#N/A	#N/A	6.54305	#N/A
CNAG_00558	_STSVNKSWSHTAMTSS[Phospho (STY)]VPPSAWQSR_	-	hypothetical protein	#N/A	#N/A	#N/A	8.56927	7.9302	8.0959
CNAG_00564	_DLM[Oxidation (M)]LLETAC[Carbamidomethyl (C)]PTS[Phospho (STY)]PLPTK_	-	hypothetical protein	#N/A	#N/A	1.08617	#N/A	#N/A	#N/A
CNAG_00564	_SNDSKVPMLSAET[Phospho (STY)]QTTSPGSFLPASFSDR_	-	hypothetical protein	#N/A	7.67421	6.72919	#N/A	#N/A	#N/A
CNAG_00564	_TTPGWTY[Phospho (STY)]QDTFASSPR_	-	hypothetical protein	#N/A	6.89815	6.79971	#N/A	#N/A	#N/A
CNAG_00564	_DLMLLETAC[Carbamidomethyl (C)]PTSPLPT[Phospho (STY)]KK_	-	hypothetical protein	4.51749	6.18803	#N/A	#N/A	#N/A	#N/A
CNAG_00564	_FT[Phospho (STY)]LHDSPQLPHSYHNC[Carbamidomethyl (C)]HYR_	-	hypothetical protein	1.27714	#N/A	#N/A	#N/A	#N/A	#N/A
CNAG_00564	_[Acetyl (Protein N-term)]MFPSTGKDLMLLETAC[Carbamidomethyl (C)]PT[Phospho (STY)]SPLPTK_	-	hypothetical protein	#N/A	#N/A	#N/A	1.68237	2.12285	1.92114
CNAG_00564	_DLMLLETAC[Carbamidomethyl (C)]PT[Phospho (STY)]SPLPTK_	-	hypothetical protein	#N/A	#N/A	#N/A	#N/A	1.45523	#N/A
CNAG_00564	_DLMLLETAC[Carbamidomethyl (C)]PTS[Phospho (STY)]PLPTK_	-	hypothetical protein	#N/A	#N/A	#N/A	#N/A	1.38068	#N/A
CNAG_00564	_DLMLLETAC[Carbamidomethyl (C)]PTSPLPT[Phospho (STY)]K_	-	hypothetical protein	#N/A	#N/A	#N/A	#N/A	1.36989	#N/A
CNAG_00564	_FTLHDS[Phospho (STY)]PQLPHSYHNC[Carbamidomethyl (C)]HYR_	-	hypothetical protein	#N/A	#N/A	#N/A	#N/A	1.89687	#N/A
CNAG_00564	_TTPGWTYQDTFAS[Phospho (STY)]SPR_	-	hypothetical protein	#N/A	#N/A	#N/A	1.02947	#N/A	#N/A
CNAG_00564	_TTPGWTYQDTFASS[Phospho (STY)]PR_	-	hypothetical protein	#N/A	#N/A	#N/A	1.06301	#N/A	#N/A
CNAG_00566	_NHVLQLPEEDQIS[Phospho (STY)]PLSYVK_	-	DNA ligase 1	#N/A	6.17686	#N/A	#N/A	#N/A	#N/A
CNAG_00566	_LQATS[Phospho (STY)]VTPPSKK_	-	DNA ligase 1	#N/A	#N/A	#N/A	5.61531	5.72205	6.22305
CNAG_00567	_TVDADVS[Phospho (STY)]DDEQAPK_	RRF2	WD40 repeat protein	#N/A	#N/A	#N/A	#N/A	#N/A	1.05188
CNAG_00569	_IPVPLSAPNPY[Phospho (STY)]SGDSLSTSATFHPETPAHTHVPGR_	-	GTP cyclohydrolase II	#N/A	#N/A	1.03664	#N/A	#N/A	#N/A
CNAG_00569	_IPVPLSAPNPYSGDS[Phospho (STY)]LSTSATFHPETPAHTHVPGR_	-	GTP cyclohydrolase II	#N/A	#N/A	1.04175	#N/A	#N/A	#N/A
CNAG_00569	_AS[Phospho (STY)]SSSFNFFHPHVNAVPQSIPGR_	-	GTP cyclohydrolase II	#N/A	#N/A	1.04422	#N/A	#N/A	#N/A
CNAG_00569	_IPVPLSAPNPYSGDSLSTSAT[Phospho (STY)]FHPETPAHTHVPGR_	-	GTP cyclohydrolase II	#N/A	#N/A	1.0707	#N/A	#N/A	#N/A
CNAG_00569	_ASS[Phospho (STY)]SSFNFFHPHVNAVPQSIPGR_	-	GTP cyclohydrolase II	#N/A	#N/A	1.15137	#N/A	#N/A	#N/A
CNAG_00569	_THSPPT[Phospho (STY)]QADLDVLSLLTSDQSAIGTLPFQSTR_	-	GTP cyclohydrolase II	#N/A	4.5876	4.70543	#N/A	#N/A	#N/A
CNAG_00569	_T[Phospho (STY)]HSPPTQADLDVLSLLTSDQSAIGTLPFQSTR_	-	GTP cyclohydrolase II	#N/A	#N/A	5.17721	#N/A	#N/A	#N/A
CNAG_00569	_ALS[Phospho (STY)]PQAQAAYDR_	-	GTP cyclohydrolase II	7.31745	#N/A	8.04235	#N/A	#N/A	#N/A
CNAG_00570	_RATVPADSNLSVQPLFST[Phospho (STY)]PFGTSSDVLR_	PKR1	cAMP-dependent protein kinase regulator	-8.09602	2.01593	-2.60993	-3.11863	#N/A	-3.66135
CNAG_00570	_TDDRS[Phospho (STY)]PFS[Phospho (STY)]EGGGMPFDSSPFGGKPPSHGAQDDPPIPSYALGR_	PKR1	cAMP-dependent protein kinase regulator	#N/A	#N/A	1.11031	#N/A	#N/A	#N/A
CNAG_00570	_T[Phospho (STY)]DDRS[Phospho (STY)]PFSEGGGMPFDSSPFGGKPPSHGAQDDPPIPSYALGR_	PKR1	cAMP-dependent protein kinase regulator	#N/A	#N/A	1.16528	#N/A	#N/A	#N/A
CNAG_00570	_QAPSGTLAFNTTNFGT[Phospho (STY)]LPPHALSPFSEMGPSDSPFGPTAR_	PKR1	cAMP-dependent protein kinase regulator	#N/A	#N/A	1.18462	#N/A	#N/A	#N/A
CNAG_00570	_QAPSGTLAFNTTNFGTLPPHALS[Phospho (STY)]PFSEMGPSDSPFGPTAR_	PKR1	cAMP-dependent protein kinase regulator	#N/A	#N/A	1.18462	#N/A	#N/A	#N/A
CNAG_00570	_QAPSGTLAFNTTNFGTLPPHALSPFS[Phospho (STY)]EMGPSDSPFGPTAR_	PKR1	cAMP-dependent protein kinase regulator	#N/A	#N/A	1.18462	#N/A	#N/A	#N/A
CNAG_00570	_TDDRS[Phospho (STY)]PFSEGGGMPFDSSPFGGKPPSHGAQDDPPIPSYALGR_	PKR1	cAMP-dependent protein kinase regulator	#N/A	1.21405	1.1937	#N/A	#N/A	#N/A
CNAG_00570	_T[Phospho (STY)]DDRSPFSEGGGMPFDSSPFGGKPPSHGAQDDPPIPSYALGR_	PKR1	cAMP-dependent protein kinase regulator	#N/A	1.22413	1.20145	#N/A	#N/A	#N/A
CNAG_00570	_RTS[Phospho (STY)]VSAESLVPTSQR_	PKR1	cAMP-dependent protein kinase regulator	1.53226	#N/A	1.5819	#N/A	1.04182	#N/A
CNAG_00570	_T[Phospho (STY)]SVSAESLVPTSQR_	PKR1	cAMP-dependent protein kinase regulator	1.35844	#N/A	1.58641	#N/A	1.43638	#N/A
CNAG_00570	_TSVS[Phospho (STY)]AESLVPTSQR_	PKR1	cAMP-dependent protein kinase regulator	1.62849	#N/A	1.79758	#N/A	#N/A	#N/A
CNAG_00570	_TS[Phospho (STY)]VSAESLVPTSQR_	PKR1	cAMP-dependent protein kinase regulator	2.04682	#N/A	2.27628	#N/A	1.3813	#N/A
CNAG_00570	_RATVPADSNLSVQPLFSTPFGTS[Phospho (STY)]SDVLR_	PKR1	cAMP-dependent protein kinase regulator	#N/A	#N/A	4.64105	#N/A	#N/A	#N/A
CNAG_00570	_RATVPADSNLSVQPLFSTPFGT[Phospho (STY)]SSDVLR_	PKR1	cAMP-dependent protein kinase regulator	#N/A	4.28959	5.97294	-4.76185	#N/A	#N/A
CNAG_00570	_QAPSGTLAFNTTNFGTLPPHALSPFS[Phospho (STY)]EM[Oxidation (M)]GPSDSPFGPTAR_	PKR1	cAMP-dependent protein kinase regulator	#N/A	1.06147	#N/A	#N/A	#N/A	#N/A
CNAG_00570	_QAPSGTLAFNTTNFGTLPPHALS[Phospho (STY)]PFSEM[Oxidation (M)]GPSDSPFGPTAR_	PKR1	cAMP-dependent protein kinase regulator	#N/A	1.06158	#N/A	#N/A	#N/A	#N/A
CNAG_00570	_QAPSGT[Phospho (STY)]LAFNTTNFGTLPPHALSPFSEM[Oxidation (M)]GPSDSPFGPTAR_	PKR1	cAMP-dependent protein kinase regulator	#N/A	1.19926	#N/A	#N/A	#N/A	#N/A
CNAG_00570	_RAT[Phospho (STY)]VPADSNLSVQPLFSTPFGTSSDVLR_	PKR1	cAMP-dependent protein kinase regulator	#N/A	2.14982	#N/A	-2.87193	#N/A	-3.33722
CNAG_00570	_RATVPADS[Phospho (STY)]NLSVQPLFSTPFGTSSDVLR_	PKR1	cAMP-dependent protein kinase regulator	#N/A	2.16582	#N/A	-2.96123	#N/A	-3.46717
CNAG_00573	_SAPDIVQLYGLHVS[Phospho (STY)]PSLVR_	-	NADH dehydrogenase (ubiquinone) 1 alpha subcomplex 6	#N/A	#N/A	3.72539	#N/A	#N/A	#N/A
CNAG_00573	_SAPDIVQLYGLHVSPS[Phospho (STY)]LVR_	-	NADH dehydrogenase (ubiquinone) 1 alpha subcomplex 6	#N/A	#N/A	4.64283	#N/A	#N/A	#N/A
CNAG_00575	_NENLPLTS[Phospho (STY)]PK_	CAT3	Catalase 3	#N/A	#N/A	#N/A	#N/A	1.76015	#N/A
CNAG_00577	_DRETPTTTTTVVDST[Phospho (STY)]PSSPK_	-	hypothetical protein	#N/A	4.93993	#N/A	-1.93599	#N/A	#N/A
CNAG_00577	_DRETPTTTTTVVDS[Phospho (STY)]TPSSPK_	-	hypothetical protein	#N/A	8.08165	#N/A	#N/A	#N/A	#N/A
CNAG_00583	_QPILDSS[Phospho (STY)]LHFER_	-	hypothetical protein	#N/A	#N/A	1.26127	#N/A	#N/A	#N/A
CNAG_00583	_QGQMSPST[Phospho (STY)]PVR_	-	hypothetical protein	#N/A	#N/A	1.30812	#N/A	#N/A	#N/A
CNAG_00583	_ALPPTPILVPSKSPSSNLGS[Phospho (STY)]QIAAGSK_	-	hypothetical protein	6.76856	6.58045	6.89757	#N/A	#N/A	#N/A
CNAG_00583	_ADSNISTSAESSPALPPTSFS[Phospho (STY)]VSSPDPPNR_	-	hypothetical protein	7.44033	#N/A	8.44038	#N/A	#N/A	#N/A
CNAG_00583	_ALPPTPILVPS[Phospho (STY)]KSPSSNLGSQIAAGSK_	-	hypothetical protein	8.93152	6.64015	9.3403	9.41055	#N/A	#N/A
CNAG_00583	_RRLS[Phospho (STY)]VESTVLK_	-	hypothetical protein	#N/A	1.09341	#N/A	#N/A	#N/A	#N/A
CNAG_00583	_QGQMS[Phospho (STY)]PSTPVR_	-	hypothetical protein	#N/A	1.18607	#N/A	#N/A	#N/A	#N/A
CNAG_00583	_RASS[Phospho (STY)]GMVPLSMSGTGNNPFFLNNSQIR_	-	hypothetical protein	#N/A	1.3335	#N/A	#N/A	#N/A	#N/A
CNAG_00583	_RAS[Phospho (STY)]SGMVPLSMSGTGNNPFFLNNSQIR_	-	hypothetical protein	#N/A	1.34821	#N/A	#N/A	#N/A	#N/A
CNAG_00583	_RASS[Phospho (STY)]GMVPLSM[Oxidation (M)]SGTGNNPFFLNNSQIR_	-	hypothetical protein	#N/A	1.46736	#N/A	#N/A	#N/A	-2.25291
CNAG_00583	_RAS[Phospho (STY)]SGMVPLSM[Oxidation (M)]SGTGNNPFFLNNSQIR_	-	hypothetical protein	#N/A	1.4675	#N/A	#N/A	#N/A	-1.76667
CNAG_00583	_RLS[Phospho (STY)]VESTVLK_	-	hypothetical protein	#N/A	1.55368	#N/A	#N/A	#N/A	#N/A
CNAG_00583	_QGQM[Oxidation (M)]S[Phospho (STY)]PSTPVR_	-	hypothetical protein	5.8837	#N/A	#N/A	#N/A	#N/A	#N/A
CNAG_00583	_VEIAEPS[Phospho (STY)]SHHLEPTDSHEGKDSK_	-	hypothetical protein	#N/A	#N/A	#N/A	#N/A	4.65335	5.25414
CNAG_00583	_VEIAEPSS[Phospho (STY)]HHLEPTDSHEGKDSK_	-	hypothetical protein	#N/A	#N/A	#N/A	#N/A	3.84564	4.07279
CNAG_00583	_VEIAEPSSHHLEPT[Phospho (STY)]DSHEGKDSK_	-	hypothetical protein	#N/A	#N/A	#N/A	#N/A	4.3201	4.77632
CNAG_00583	_VEIAEPSSHHLEPTDSHEGKDS[Phospho (STY)]K_	-	hypothetical protein	#N/A	#N/A	#N/A	2.7929	3.55171	4.12872
CNAG_00588	_TWDINPGSGSVILHGTNFALDAGTGS[Phospho (STY)]DNNEGVK_	-	hypothetical protein	#N/A	#N/A	2.11164	#N/A	5.68449	#N/A
CNAG_00588	_C[Carbamidomethyl (C)]LSPNSNDNS[Phospho (STY)]NGVPVVTVNC[Carbamidomethyl (C)]DQAK_	-	hypothetical protein	#N/A	#N/A	2.46214	7.58683	5.4937	#N/A
CNAG_00588	_TWDINPGSGS[Phospho (STY)]VILHGTNFALDAGTGSDNNEGVK_	-	hypothetical protein	9.90361	9.76476	#N/A	#N/A	#N/A	#N/A
CNAG_00588	_DGKC[Carbamidomethyl (C)]LSPNS[Phospho (STY)]NDNSNGVPVVTVNC[Carbamidomethyl (C)]DQAK_	-	hypothetical protein	#N/A	#N/A	#N/A	#N/A	6.18652	#N/A
CNAG_00589	_THNPSTPS[Phospho (STY)]LSGPSSEQDMR_	-	5-formyltetrahydrofolate cyclo-ligase	5.75196	5.38258	5.459	#N/A	#N/A	#N/A
CNAG_00594	_SVPAEIPSLVRSPPST[Phospho (STY)]LLDAPAR_	-	lipid particle protein	#N/A	#N/A	1.14474	#N/A	#N/A	#N/A
CNAG_00594	_GGEVKT[Phospho (STY)]PEYEVDEDVYSR_	-	lipid particle protein	#N/A	#N/A	6.43981	#N/A	#N/A	#N/A
CNAG_00598	_[Acetyl (Protein N-term)]ST[Phospho (STY)]NDHLTATDIIK_	-	nicotinamide mononucleotide permease	#N/A	#N/A	#N/A	#N/A	3.35493	#N/A
CNAG_00599	_SY[Phospho (STY)]EDVDSTETKR_	-	anion transporter	5.8837	5.44484	6.20476	#N/A	#N/A	#N/A
CNAG_00603	_DAVVSLILGS[Phospho (STY)]PPGK_	-	pre-rRNA-processing protein PNO1	#N/A	#N/A	1.05869	#N/A	#N/A	1.19913
CNAG_00603	_DAVVS[Phospho (STY)]LILGSPPGK_	-	pre-rRNA-processing protein PNO1	#N/A	#N/A	#N/A	6.82581	#N/A	#N/A
CNAG_00604	_S[Phospho (STY)]ILEPLGLHQDNPSPPVASHPSK_	-	hypothetical protein	-5.08332	#N/A	1.6615	#N/A	#N/A	#N/A
CNAG_00604	_QHVSDASIHLSAPETSS[Phospho (STY)]LQGSR_	-	hypothetical protein	5.30766	4.05065	4.79776	#N/A	#N/A	#N/A
CNAG_00606	_DGEQASSPHY[Phospho (STY)]S[Phospho (STY)]DGDDLFGDDDDDEDAEAVQAHR_	-	transcription initiation factor TFIID subunit 7	#N/A	#N/A	4.41299	#N/A	#N/A	#N/A
CNAG_00609	_RS[Phospho (STY)]DSASSESGLDMENLTR_	-	hypothetical protein	#N/A	4.5624	#N/A	#N/A	#N/A	#N/A
CNAG_00609	_SRDVS[Phospho (STY)]PNVALSSRPGLK_	-	hypothetical protein	#N/A	#N/A	#N/A	#N/A	#N/A	1.03816
CNAG_00612	_AGGSSSGKDS[Phospho (STY)]HSIFK_	-	DNA excision repair protein ERCC-3	#N/A	#N/A	#N/A	#N/A	#N/A	5.6071
CNAG_00612	_GTVT[Phospho (STY)]PTASGSGSGTK_	-	DNA excision repair protein ERCC-3	#N/A	#N/A	#N/A	#N/A	#N/A	3.32484
CNAG_00612	_SALVLC[Carbamidomethyl (C)]T[Phospho (STY)]SAVSVAQWK_	-	DNA excision repair protein ERCC-3	#N/A	#N/A	#N/A	#N/A	#N/A	5.19648
CNAG_00613	_SPVEGSPAKPEDYPHFMS[Phospho (STY)]VAHEQALK_	FCY1	Cytosine deaminase	8.0439	7.70025	#N/A	#N/A	#N/A	#N/A
CNAG_00625	_NTPVMFVMESPMEIGY[Phospho (STY)]EEVSQER_	-	ARF guanyl-nucleotide exchange factor	1.40655	#N/A	1.99288	#N/A	5.08041	#N/A
CNAG_00625	_NT[Phospho (STY)]PVMFVMESPMEIGYEEVSQER_	-	ARF guanyl-nucleotide exchange factor	1.66454	#N/A	2.38869	#N/A	#N/A	#N/A
CNAG_00625	_NTPVMFVMES[Phospho (STY)]PMEIGYEEVSQER_	-	ARF guanyl-nucleotide exchange factor	2.29831	#N/A	2.87705	#N/A	#N/A	#N/A
CNAG_00625	_ASFSSITPPLSSNASSTQY[Phospho (STY)]SVLGDPLHTHK_	-	ARF guanyl-nucleotide exchange factor	6.33092	5.02924	5.86859	5.73069	#N/A	#N/A
CNAG_00625	_DKTQPPLPIGMDRPLPPLPPPT[Phospho (STY)]PDSK_	-	ARF guanyl-nucleotide exchange factor	#N/A	6.02961	6.54997	#N/A	#N/A	#N/A
CNAG_00625	_SSRPSTPTPS[Phospho (STY)]TPTSVR_	-	ARF guanyl-nucleotide exchange factor	#N/A	3.95171	#N/A	#N/A	#N/A	#N/A
CNAG_00625	_ASTVSLAPTSYHFTPPSPST[Phospho (STY)]FPTSATPPR_	-	ARF guanyl-nucleotide exchange factor	#N/A	5.25438	#N/A	#N/A	#N/A	-3.24837
CNAG_00625	_TSGHTTPLNFGPSTPT[Phospho (STY)]FSAFLNGSNPPNK_	-	ARF guanyl-nucleotide exchange factor	#N/A	5.56419	#N/A	#N/A	#N/A	#N/A
CNAG_00625	_AAS[Phospho (STY)]LLEER_	-	ARF guanyl-nucleotide exchange factor	#N/A	#N/A	#N/A	#N/A	1.31449	#N/A
CNAG_00625	_ASFSSITPPLS[Phospho (STY)]SNASSTQYSVLGDPLHTHK_	-	ARF guanyl-nucleotide exchange factor	#N/A	#N/A	#N/A	4.28526	#N/A	#N/A
CNAG_00625	_DKTQPPLPIGMDRPLPPLPPPTPDS[Phospho (STY)]K_	-	ARF guanyl-nucleotide exchange factor	#N/A	#N/A	#N/A	#N/A	4.12003	#N/A
CNAG_00625	_MDSRTGS[Phospho (STY)]SNSAIIGR_	-	ARF guanyl-nucleotide exchange factor	#N/A	#N/A	#N/A	4.69821	4.78927	#N/A
CNAG_00625	_RLNS[Phospho (STY)]LFAR_	-	ARF guanyl-nucleotide exchange factor	#N/A	#N/A	#N/A	#N/A	4.1741	#N/A
CNAG_00626	_ATLGEENVQS[Phospho (STY)]SHTIESAVASDDPKDVNPK_	-	hypothetical protein	#N/A	#N/A	#N/A	#N/A	4.47983	#N/A
CNAG_00627	_HQNIS[Phospho (STY)]VVAAK_	-	specific transcriptional repressor	#N/A	#N/A	1.73191	#N/A	#N/A	#N/A
CNAG_00634	_ELALHSFHTNHLPVS[Phospho (STY)]PPTRPLSHSPK_	-	hypothetical protein	4.466	4.62047	4.66245	#N/A	#N/A	#N/A
CNAG_00634	_KAALMGLLSTKSPT[Phospho (STY)]PK_	-	hypothetical protein	#N/A	#N/A	5.04221	#N/A	#N/A	#N/A
CNAG_00634	_GNIPPLPAFFASDPAIVSSVPAAAS[Phospho (STY)]LEHK_	-	hypothetical protein	#N/A	6.06349	6.10824	#N/A	#N/A	#N/A
CNAG_00635	_ALT[Phospho (STY)]GGPPAFGPVPLSPTAANSSPNTATAPYFPHVGPHPIR_	-	cytoplasmic protein	#N/A	#N/A	1.03233	#N/A	#N/A	#N/A
CNAG_00635	_QASTGHTSSLSTHLHPHS[Phospho (STY)]RPR_	-	cytoplasmic protein	#N/A	#N/A	4.0967	#N/A	#N/A	#N/A
CNAG_00635	_QTVASVVS[Phospho (STY)]TEDVR_	-	cytoplasmic protein	5.2062	4.83624	4.88438	#N/A	#N/A	#N/A
CNAG_00635	_HQS[Phospho (STY)]LDISQLNFSR_	-	cytoplasmic protein	#N/A	1.14168	#N/A	#N/A	#N/A	#N/A
CNAG_00635	_IKQTVASVVST[Phospho (STY)]EDVR_	-	cytoplasmic protein	#N/A	#N/A	#N/A	#N/A	#N/A	3.25078
CNAG_00636	_LATAS[Phospho (STY)]PSKPSPAR_	CDC7	CDC7 protein kinase	#N/A	#N/A	1.75616	#N/A	#N/A	#N/A
CNAG_00636	_LRSS[Phospho (STY)]S[Phospho (STY)]LY[Phospho (STY)]DPFTAPAAEGTK_	CDC7	CDC7 protein kinase	5.28889	5.21256	5.43521	#N/A	#N/A	#N/A
CNAG_00636	_IKTPDT[Phospho (STY)]SAVEQAVYDAR_	CDC7	CDC7 protein kinase	6.82412	6.44706	6.68764	#N/A	#N/A	#N/A
CNAG_00636	_LATASPSKPS[Phospho (STY)]PAR_	CDC7	CDC7 protein kinase	5.17853	#N/A	#N/A	2.01911	#N/A	1.59727
CNAG_00638	_LSLGQQDEQTT[Phospho (STY)]PEVR_	-	GTPase	4.84347	#N/A	4.97805	#N/A	#N/A	#N/A
CNAG_00638	_S[Phospho (STY)]SVDWASLKEEDHIPDPR_	-	GTPase	#N/A	#N/A	#N/A	#N/A	#N/A	4.52339
CNAG_00641	_TPAYGIQGGKT[Phospho (STY)]PNAYAM[Oxidation (M)]GPPGPSGGR_	-	transcription elongation factor spt5	#N/A	-3.22584	4.88155	#N/A	#N/A	#N/A
CNAG_00641	_TPAY[Phospho (STY)]GIQGGKTPNAYAMGPPGPSGGR_	-	transcription elongation factor spt5	#N/A	5.91828	#N/A	#N/A	#N/A	#N/A
CNAG_00641	_[Acetyl (Protein N-term)]S[Phospho (STY)]DIEVKS[Phospho (STY)]S[Phospho (STY)]PPESPVQEQEETR_	-	transcription elongation factor spt5	#N/A	#N/A	#N/A	5.27812	#N/A	#N/A
CNAG_00641	_TPAWGASGGKT[Phospho (STY)]PAYGMASGGK_	-	transcription elongation factor spt5	#N/A	#N/A	#N/A	#N/A	5.64932	#N/A
CNAG_00649	_EGQLVPTHSISAGLDYNS[Phospho (STY)]VGPEHSHLK_	-	tryptophan synthase, beta subunit	#N/A	#N/A	#N/A	#N/A	7.29969	#N/A
CNAG_00649	_MGVTGSSSSENIS[Phospho (STY)]ASLPELVK_	-	tryptophan synthase, beta subunit	#N/A	#N/A	#N/A	#N/A	3.90501	4.37144
CNAG_00649	_MGVTGSSSSENIS[Phospho (STY)]ASLPELVKR_	-	tryptophan synthase, beta subunit	#N/A	#N/A	#N/A	#N/A	#N/A	4.75954
CNAG_00650	_PAVDQPNAPT[Phospho (STY)]PPR_	-	GRAM domain-containing protein	4.85419	4.85463	4.16126	#N/A	#N/A	#N/A
CNAG_00650	_TNSGSGSGIT[Phospho (STY)]SGGTSSEAQEYAAK_	-	GRAM domain-containing protein	#N/A	#N/A	4.48825	#N/A	#N/A	#N/A
CNAG_00650	_TNSGSGSGITSGGT[Phospho (STY)]SSEAQEYAAK_	-	GRAM domain-containing protein	#N/A	#N/A	8.61675	#N/A	#N/A	#N/A
CNAG_00650	_LRHPST[Phospho (STY)]SADSR_	-	GRAM domain-containing protein	#N/A	4.06979	#N/A	#N/A	#N/A	#N/A
CNAG_00650	_DRPSS[Phospho (STY)]FASSQHDPSAHGQHGIR_	-	GRAM domain-containing protein	#N/A	5.57583	#N/A	#N/A	#N/A	#N/A
CNAG_00650	_DIEYSDWRPISPSS[Phospho (STY)]PNLTR_	-	GRAM domain-containing protein	#N/A	7.25421	#N/A	#N/A	#N/A	#N/A
CNAG_00650	_TTPSRPAPLQVPDS[Phospho (STY)]GPRPAGTPK_	-	GRAM domain-containing protein	#N/A	#N/A	#N/A	#N/A	1.51374	#N/A
CNAG_00651	_LGDPS[Phospho (STY)]QPVPSAPSR_	-	ATP-binding cassette, subfamily D (ALD), peroxisomal long-chain fatty acid import protein	#N/A	#N/A	5.82046	#N/A	#N/A	#N/A
CNAG_00651	_AQSTY[Phospho (STY)]SLTAFQAPSQLDAPHQK_	-	ATP-binding cassette, subfamily D (ALD), peroxisomal long-chain fatty acid import protein	5.67994	5.85529	6.26929	#N/A	#N/A	#N/A
CNAG_00651	_IT[Phospho (STY)]PTPSELYK_	-	ATP-binding cassette, subfamily D (ALD), peroxisomal long-chain fatty acid import protein	7.6492	8.05211	7.45514	#N/A	#N/A	#N/A
CNAG_00652	_ADRVET[Phospho (STY)]TPVPDELNEGTPSQPIMTR_	-	hypothetical protein, variant 2	#N/A	#N/A	1.13769	#N/A	#N/A	#N/A
CNAG_00652	_ADRVETTPVPDELNEGT[Phospho (STY)]PSQPIMTR_	-	hypothetical protein, variant 2	#N/A	#N/A	1.22573	#N/A	#N/A	#N/A
CNAG_00660	_MSLGENASTPPVHES[Phospho (STY)]K_	-	histone deacetylase HOS3	#N/A	#N/A	5.28152	#N/A	#N/A	#N/A
CNAG_00660	_MSLGENAST[Phospho (STY)]PPVHESK_	-	histone deacetylase HOS3	5.82896	5.41625	5.32209	#N/A	#N/A	#N/A
CNAG_00660	_TPPSETVTYNPAVTPT[Phospho (STY)]ELLHHFSGGH_	-	histone deacetylase HOS3	#N/A	3.10862	#N/A	#N/A	#N/A	#N/A
CNAG_00660	_MSLGENAS[Phospho (STY)]TPPVHESK_	-	histone deacetylase HOS3	#N/A	6.38077	#N/A	5.71042	#N/A	#N/A
CNAG_00660	_MS[Phospho (STY)]LGENASTPPVHESK_	-	histone deacetylase HOS3	#N/A	#N/A	#N/A	7.38266	#N/A	#N/A
CNAG_00661	_AGTVQPDADNSTHGEEGSQWS[Phospho (STY)]K_	-	hypothetical protein	7.34396	#N/A	#N/A	#N/A	6.47805	#N/A
CNAG_00663	_VPPYQTFIESS[Phospho (STY)]PSHNAGSEKPSFDPK_	-	hypothetical protein	#N/A	3.43791	2.76828	#N/A	#N/A	#N/A
CNAG_00663	_VPPYQTFIESSPS[Phospho (STY)]HNAGSEKPSFDPK_	-	hypothetical protein	5.44736	6.1447	5.54147	#N/A	#N/A	#N/A
CNAG_00665	_AVLDSMFPDLGKSPAPVPTGQQQGPT[Phospho (STY)]GQSPAPIGPSHEELAR_	-	DNA topoisomerase 2-associated protein PAT1	#N/A	5.25238	5.2145	#N/A	#N/A	#N/A
CNAG_00665	_AVLDSMFPDLGKS[Phospho (STY)]PAPVPTGQQQGPTGQSPAPIGPSHEELAR_	-	DNA topoisomerase 2-associated protein PAT1	#N/A	#N/A	6.64029	#N/A	#N/A	#N/A
CNAG_00665	_VAADPFAFS[Phospho (STY)]EDDFYASRPVK_	-	DNA topoisomerase 2-associated protein PAT1	#N/A	#N/A	#N/A	2.94863	3.45423	#N/A
CNAG_00666	_FKSPT[Phospho (STY)]PGPEGGFSLGVATNEAAPAS[Phospho (STY)]PGGRR_	-	nucleoporin NSP1	1.17348	#N/A	1.06125	#N/A	#N/A	#N/A
CNAG_00666	_ASSPLAAGSIVAAPDS[Phospho (STY)]PPTMPM[Oxidation (M)]PK_	-	nucleoporin NSP1	1.1097	#N/A	1.06368	#N/A	#N/A	#N/A
CNAG_00666	_FKSPT[Phospho (STY)]PGPEGGFS[Phospho (STY)]LGVATNEAAPAS[Phospho (STY)]PGGR_	-	nucleoporin NSP1	#N/A	#N/A	1.10306	#N/A	#N/A	#N/A
CNAG_00666	_FKSPTPGPEGGFS[Phospho (STY)]LGVATNEAAPAS[Phospho (STY)]PGGRR_	-	nucleoporin NSP1	#N/A	#N/A	1.13238	#N/A	#N/A	#N/A
CNAG_00666	_FKSPTPGPEGGFS[Phospho (STY)]LGVAT[Phospho (STY)]NEAAPAS[Phospho (STY)]PGGR_	-	nucleoporin NSP1	#N/A	#N/A	1.13462	#N/A	#N/A	#N/A
CNAG_00666	_FKS[Phospho (STY)]PT[Phospho (STY)]PGPEGGFSLGVATNEAAPAS[Phospho (STY)]PGGR_	-	nucleoporin NSP1	#N/A	#N/A	1.14821	#N/A	#N/A	#N/A
CNAG_00666	_SITANGTSSPFGT[Phospho (STY)]APTIIANADAAK_	-	nucleoporin NSP1	#N/A	#N/A	1.36921	#N/A	#N/A	#N/A
CNAG_00666	_FKS[Phospho (STY)]PT[Phospho (STY)]PGPEGGFSLGVAT[Phospho (STY)]NEAAPASPGGRR_	-	nucleoporin NSP1	1.45624	#N/A	1.52476	#N/A	#N/A	#N/A
CNAG_00666	_SITANGTSS[Phospho (STY)]PFGTAPTIIANADAAK_	-	nucleoporin NSP1	#N/A	#N/A	1.60048	#N/A	#N/A	#N/A
CNAG_00666	_FKSPTPGPEGGFSLGVAT[Phospho (STY)]NEAAPASPGGRR_	-	nucleoporin NSP1	#N/A	#N/A	3.88269	#N/A	-2.70499	#N/A
CNAG_00666	_RDSLSSFGHELEDPESPS[Phospho (STY)]DRR_	-	nucleoporin NSP1	#N/A	#N/A	3.95811	#N/A	#N/A	#N/A
CNAG_00666	_MESQEY[Phospho (STY)]RPSPTPSDAR_	-	nucleoporin NSP1	#N/A	4.45537	5.12393	#N/A	#N/A	#N/A
CNAG_00666	_APPAALPPPIMSAS[Phospho (STY)]ASPAPVFSFGASVNGK_	-	nucleoporin NSP1	#N/A	#N/A	5.3921	#N/A	#N/A	#N/A
CNAG_00666	_SITANGTSSPFGTAPT[Phospho (STY)]IIANADAAK_	-	nucleoporin NSP1	7.74835	7.29927	7.63461	#N/A	#N/A	#N/A
CNAG_00666	_TTVSAAS[Phospho (STY)]PFSFSGKEPEVAK_	-	nucleoporin NSP1	#N/A	#N/A	7.74969	#N/A	#N/A	#N/A
CNAG_00666	_SPTPGPEGGFSLGVATNEAAPAS[Phospho (STY)]PGGRR_	-	nucleoporin NSP1	#N/A	5.75661	#N/A	#N/A	#N/A	#N/A
CNAG_00666	_ALSGAHRPNS[Phospho (STY)]NPR_	-	nucleoporin NSP1	1.96304	#N/A	#N/A	#N/A	#N/A	#N/A
CNAG_00666	_SETASQTSGAQIGSLAPKEPS[Phospho (STY)]PSPPSAPTPR_	-	nucleoporin NSP1	3.57968	#N/A	#N/A	#N/A	#N/A	#N/A
CNAG_00666	_DLELSS[Phospho (STY)]LPGGSM[Oxidation (M)]SR_	-	nucleoporin NSP1	#N/A	#N/A	#N/A	#N/A	6.37473	#N/A
CNAG_00666	_STSPTPPPAPPSVPSIIATAPSPGGPSTSDTY[Phospho (STY)]QPR_	-	nucleoporin NSP1	#N/A	#N/A	#N/A	4.80707	#N/A	5.14096
CNAG_00667	_SRDSGAESVKSPLPT[Phospho (STY)]SLSLGNLR_	-	hypothetical protein	#N/A	#N/A	1.05821	#N/A	#N/A	#N/A
CNAG_00667	_IGS[Phospho (STY)]GQGFNSHNKESAAK_	-	hypothetical protein	7.21927	6.33469	6.44341	#N/A	#N/A	#N/A
CNAG_00667	_AC[Carbamidomethyl (C)]S[Phospho (STY)]PQNLTESSS[Phospho (STY)]PK_	-	hypothetical protein	#N/A	7.31958	7.22789	#N/A	#N/A	#N/A
CNAG_00667	_VGGTPT[Phospho (STY)]TVTKEEK_	-	hypothetical protein	#N/A	#N/A	8.36655	#N/A	#N/A	#N/A
CNAG_00667	_VGGT[Phospho (STY)]PTTVTKEEK_	-	hypothetical protein	#N/A	9.98017	#N/A	-2.20592	#N/A	#N/A
CNAG_00667	_GWAWVVEDENGNVIDLPS[Phospho (STY)]DEEIAFR_	-	hypothetical protein	#N/A	#N/A	#N/A	#N/A	1.0947	#N/A
CNAG_00667	_IGS[Phospho (STY)]GQGFNSHNK_	-	hypothetical protein	#N/A	#N/A	#N/A	#N/A	3.7229	#N/A
CNAG_00668	_VQNQHLAGSSGAHAQPMS[Phospho (STY)]PTDTDATGVTVHR_	-	hypothetical protein	#N/A	#N/A	1.18442	#N/A	#N/A	#N/A
CNAG_00668	_VQNQHLAGSSGAHAQPMSPT[Phospho (STY)]DTDATGVTVHR_	-	hypothetical protein	#N/A	#N/A	1.18506	#N/A	#N/A	#N/A
CNAG_00668	_FRVQNQHLAGSSGAHAQPMSPT[Phospho (STY)]DTDATGVTVHR_	-	hypothetical protein	#N/A	1.54752	#N/A	#N/A	#N/A	#N/A
CNAG_00669	_YPTNSPSPSPDS[Phospho (STY)]TLPPFFR_	-	hypothetical protein	#N/A	#N/A	4.34384	#N/A	#N/A	#N/A
CNAG_00670	_TNSILSLLNGPMSSSPPS[Phospho (STY)]FIGPSNSFTHK_	FZC12	hypothetical protein, variant	8.40311	#N/A	#N/A	#N/A	#N/A	#N/A
CNAG_00673	_SSSNNDLLQNLMGS[Phospho (STY)]LFGGGR_	-	cytoplasmic protein	#N/A	#N/A	4.11986	#N/A	#N/A	#N/A
CNAG_00674	_S[Phospho (STY)]ITADEIKR_	-	hypothetical protein	8.16541	#N/A	7.7908	#N/A	#N/A	#N/A
CNAG_00679	_KDSGT[Phospho (STY)]NLY_	-	hypothetical protein	#N/A	#N/A	-1.41965	#N/A	#N/A	2.71679
CNAG_00679	_LGISPTDTVSSANS[Phospho (STY)]IEINDALFC[Carbamidomethyl (C)]EHGLEVC[Carbamidomethyl (C)]K_	-	hypothetical protein	#N/A	#N/A	#N/A	#N/A	6.83536	#N/A
CNAG_00682	_RPES[Phospho (STY)]RMDIADLDSHFDR_	-	kinesin	6.54068	#N/A	6.91447	#N/A	#N/A	#N/A
CNAG_00683	_SPY[Phospho (STY)]PHDTHESPLPPPSFLHPFPLPPR_	-	CMGC/CLK protein kinase	#N/A	#N/A	1.38716	#N/A	#N/A	#N/A
CNAG_00683	_YSRS[Phospho (STY)]PPPLDTMPPR_	-	CMGC/CLK protein kinase	7.60472	#N/A	#N/A	#N/A	#N/A	#N/A
CNAG_00683	_EVIVIDDSAS[Phospho (STY)]PM[Oxidation (M)]VQPVR_	-	CMGC/CLK protein kinase	#N/A	#N/A	#N/A	#N/A	2.48635	2.95524
CNAG_00683	_HHPHSLSHSHSDSPSLEQPRPY[Phospho (STY)]YDPAPYR_	-	CMGC/CLK protein kinase	#N/A	#N/A	#N/A	#N/A	4.97377	7.5378
CNAG_00687	_PVTVVAGPSKNSPS[Phospho (STY)]IFK_	-	hypothetical protein, variant	4.26464	5.25109	5.20982	#N/A	#N/A	#N/A
CNAG_00687	_SAPATIPSST[Phospho (STY)]PVKAPSLPK_	-	hypothetical protein, variant	#N/A	#N/A	5.30287	#N/A	#N/A	#N/A
CNAG_00687	_EVSVEIPRLT[Phospho (STY)]K_	-	hypothetical protein, variant	#N/A	5.91918	6.18615	#N/A	#N/A	#N/A
CNAG_00687	_SAPATIPSSTPVKAPS[Phospho (STY)]LPK_	-	hypothetical protein, variant	#N/A	#N/A	6.84105	#N/A	#N/A	#N/A
CNAG_00687	_TAT[Phospho (STY)]PSSSPSSASIEK_	-	hypothetical protein, variant	#N/A	3.88598	#N/A	#N/A	#N/A	#N/A
CNAG_00690	_GTEGEPKEIVTPENEDEGDY[Phospho (STY)]VDAK_	-	hypothetical protein	5.15547	#N/A	5.58335	#N/A	#N/A	#N/A
CNAG_00690	_ADVELESSLEDLRVKDDWT[Phospho (STY)]K_	-	hypothetical protein	#N/A	#N/A	#N/A	#N/A	4.0192	#N/A
CNAG_00693	_RTSYQAVSGEVEQMFSPTLGNDLPERPT[Phospho (STY)]PLK_	CDC4	F-box and WD-40 domain-containing protein CDC4, variant	#N/A	#N/A	1.35705	#N/A	#N/A	#N/A
CNAG_00693	_VPS[Phospho (STY)]PEHLK_	CDC4	F-box and WD-40 domain-containing protein CDC4, variant	6.12387	7.25162	6.50277	1.31195	#N/A	1.04288
CNAG_00693	_VPS[Phospho (STY)]PEHLKLPYHLSGEKYPLATQPAPSDMR_	CDC4	F-box and WD-40 domain-containing protein CDC4, variant	#N/A	1.00262	#N/A	#N/A	#N/A	#N/A
CNAG_00693	_VPSPEHLKLPY[Phospho (STY)]HLSGEKYPLATQPAPSDMR_	CDC4	F-box and WD-40 domain-containing protein CDC4, variant	#N/A	1.02349	#N/A	#N/A	#N/A	#N/A
CNAG_00693	_TSYQAVSGEVEQMFS[Phospho (STY)]PTLGNDLPERPTPLK_	CDC4	F-box and WD-40 domain-containing protein CDC4, variant	#N/A	#N/A	#N/A	1.48699	#N/A	1.54527
CNAG_00696	_NLDVT[Phospho (STY)]SEALLLFGNGDGGGGPTPPMLEK_	-	alpha-mannosidase	7.76038	4.36727	5.71741	#N/A	#N/A	#N/A
CNAG_00696	_NLDVTS[Phospho (STY)]EALLLFGNGDGGGGPTPPMLEK_	-	alpha-mannosidase	#N/A	#N/A	#N/A	9.22354	#N/A	#N/A
CNAG_00698	_ETLAISSPSPSS[Phospho (STY)]PNTSFTSPSSTTMAR_	-	hypothetical protein	#N/A	#N/A	5.85045	#N/A	#N/A	#N/A
CNAG_00698	_ETLAISSPSPS[Phospho (STY)]SPNTSFTSPSSTTMAR_	-	hypothetical protein	6.659	6.61033	7.1923	#N/A	#N/A	#N/A
CNAG_00698	_ETLAISSPSPSSPNTSFT[Phospho (STY)]SPSSTTMAR_	-	hypothetical protein	#N/A	6.94481	7.34643	#N/A	#N/A	#N/A
CNAG_00698	_SVDLS[Phospho (STY)]AEGSDGDTEGR_	-	hypothetical protein	#N/A	#N/A	#N/A	#N/A	#N/A	1.08225
CNAG_00703	_GVRS[Phospho (STY)]PPR_	-	large subunit ribosomal protein L31e	2.58704	#N/A	#N/A	#N/A	#N/A	#N/A
CNAG_00704	_IGS[Phospho (STY)]RPPT[Phospho (STY)]PQYLPDTQIK_	-	hypothetical protein, variant	#N/A	#N/A	4.69497	#N/A	#N/A	#N/A
CNAG_00704	_IGSRPPT[Phospho (STY)]PQYLPDTQIK_	-	hypothetical protein, variant	#N/A	#N/A	6.52413	#N/A	#N/A	#N/A
CNAG_00704	_IGS[Phospho (STY)]RPPTPQYLPDTQIK_	-	hypothetical protein, variant	#N/A	#N/A	7.8292	#N/A	#N/A	#N/A
CNAG_00706	_LAEVVPEPS[Phospho (STY)]PEES[Phospho (STY)]KAEEAEIAPVAEGEPTSPETKK_	-	RNA-binding protein rnp24	#N/A	7.48525	#N/A	#N/A	#N/A	-1.07366
CNAG_00717	_SHS[Phospho (STY)]PS[Phospho (STY)]ISGTESISSQSTADPTPPQSR_	-	hypothetical protein	#N/A	#N/A	-1.37373	#N/A	5.67413	5.11989
CNAG_00717	_TMVGS[Phospho (STY)]PDKGK_	-	hypothetical protein	#N/A	3.24281	3.6077	#N/A	#N/A	#N/A
CNAG_00717	_VDLMST[Phospho (STY)]SPTASSHLK_	-	hypothetical protein	#N/A	5.72708	4.97954	#N/A	#N/A	#N/A
CNAG_00717	_VDLMSTS[Phospho (STY)]PTASSHLK_	-	hypothetical protein	#N/A	6.18175	5.12762	#N/A	#N/A	#N/A
CNAG_00717	_KRVDLMS[Phospho (STY)]TSPTASSHLK_	-	hypothetical protein	#N/A	6.43271	6.2238	#N/A	#N/A	#N/A
CNAG_00717	_TPPTATASPLAAS[Phospho (STY)]PSTPQPPIIHPDPQMRPDTNPK_	-	hypothetical protein	#N/A	1.23135	#N/A	#N/A	#N/A	#N/A
CNAG_00717	_TPPTATASPLAASPST[Phospho (STY)]PQPPIIHPDPQMRPDTNPK_	-	hypothetical protein	#N/A	1.29969	#N/A	#N/A	#N/A	#N/A
CNAG_00717	_TPPTAT[Phospho (STY)]ASPLAASPSTPQPPIIHPDPQMRPDTNPK_	-	hypothetical protein	#N/A	1.38706	#N/A	#N/A	#N/A	#N/A
CNAG_00717	_KRVDLMST[Phospho (STY)]SPTASSHLK_	-	hypothetical protein	#N/A	5.18504	#N/A	#N/A	#N/A	#N/A
CNAG_00717	_S[Phospho (STY)]SQSQGASQAEVDGR_	-	hypothetical protein	6.50301	6.11843	#N/A	#N/A	#N/A	#N/A
CNAG_00717	_SSQSQGAS[Phospho (STY)]QAEVDGR_	-	hypothetical protein	#N/A	#N/A	#N/A	1.68449	#N/A	#N/A
CNAG_00718	_SSFSGSQTAAS[Phospho (STY)]PALSAAAFSHLAR_	CAC2	chromatin assembly factor 1 subunit B	1.15906	#N/A	1.0942	#N/A	#N/A	#N/A
CNAG_00718	_RSSFS[Phospho (STY)]GSQT[Phospho (STY)]AAS[Phospho (STY)]PALSAAAFSHLAR_	CAC2	chromatin assembly factor 1 subunit B	1.01208	#N/A	#N/A	#N/A	#N/A	#N/A
CNAG_00732	_QGTSHSNRPRPLANPT[Phospho (STY)]LSTTNNDGASSETPGEDSR_	CCD3	hypothetical protein	#N/A	6.46265	5.85108	#N/A	#N/A	#N/A
CNAG_00732	_VMSSSVRPLSAPSVSPYLSSS[Phospho (STY)]ASFGDLR_	CCD3	hypothetical protein	#N/A	6.30507	#N/A	#N/A	#N/A	#N/A
CNAG_00737	_QFITSS[Phospho (STY)]PK_	-	hypothetical protein	#N/A	#N/A	1.17957	#N/A	#N/A	#N/A
CNAG_00737	_GGT[Phospho (STY)]LPPAESPLLIEEPEELFDDISSR_	-	hypothetical protein	#N/A	#N/A	1.35832	#N/A	#N/A	#N/A
CNAG_00737	_GGTLPPAES[Phospho (STY)]PLLIEEPEELFDDISSR_	-	hypothetical protein	#N/A	#N/A	1.3591	#N/A	#N/A	#N/A
CNAG_00737	_QFITS[Phospho (STY)]SPK_	-	hypothetical protein	8.77245	7.55256	8.18643	#N/A	#N/A	#N/A
CNAG_00737	_S[Phospho (STY)]LISHDSR_	-	hypothetical protein	5.71866	#N/A	#N/A	#N/A	#N/A	#N/A
CNAG_00737	_GNQSVQS[Phospho (STY)]LGLTR_	-	hypothetical protein	#N/A	#N/A	#N/A	-4.51534	1.06225	#N/A
CNAG_00743	_HRAS[Phospho (STY)]LIIGDNATSR_	-	imidazoleglycerol phosphate synthase, cyclase subunit	#N/A	6.08058	#N/A	#N/A	#N/A	#N/A
CNAG_00745	_RLS[Phospho (STY)]LVTAEGRK_	HRK1	HAL protein kinase	#N/A	1.18583	-3.27971	-1.12068	#N/A	-1.02508
CNAG_00745	_ERAAS[Phospho (STY)]ISSTR_	HRK1	HAL protein kinase	#N/A	#N/A	-1.06764	#N/A	#N/A	3.00754
CNAG_00745	_[Acetyl (Protein N-term)]MLSS[Phospho (STY)]NPSIPLSSIDFADNEGRR_	HRK1	HAL protein kinase	#N/A	#N/A	1.29304	#N/A	#N/A	#N/A
CNAG_00745	_[Acetyl (Protein N-term)]MLSSNPS[Phospho (STY)]IPLSSIDFADNEGRR_	HRK1	HAL protein kinase	#N/A	#N/A	1.51758	#N/A	#N/A	#N/A
CNAG_00745	_AGGPHGLLPDGSS[Phospho (STY)]SLPFR_	HRK1	HAL protein kinase	#N/A	#N/A	4.34676	#N/A	#N/A	#N/A
CNAG_00745	_TFPPNLAFTPAVATPSSTSLKTTS[Phospho (STY)]PAPEAQEPQPR_	HRK1	HAL protein kinase	#N/A	5.23108	5.23416	#N/A	#N/A	#N/A
CNAG_00745	_RLSLVT[Phospho (STY)]AEGR_	HRK1	HAL protein kinase	-1.2861	1.08985	#N/A	-1.27677	#N/A	#N/A
CNAG_00745	_AQTAPSSPHQSPTAT[Phospho (STY)]R_	HRK1	HAL protein kinase	-8.29917	#N/A	#N/A	#N/A	1.40665	#N/A
CNAG_00745	_AQTAPSSPHQSPT[Phospho (STY)]ATRQPSK_	HRK1	HAL protein kinase	#N/A	#N/A	#N/A	#N/A	5.2126	3.64131
CNAG_00745	_GSPDS[Phospho (STY)]PPR_	HRK1	HAL protein kinase	#N/A	#N/A	#N/A	1.26892	#N/A	#N/A
CNAG_00745	_M[Oxidation (M)]TPADASGYAT[Phospho (STY)]PK_	HRK1	HAL protein kinase	#N/A	#N/A	#N/A	#N/A	4.99954	-2.27207
CNAG_00745	_MLTPHDGLPSPGNLS[Phospho (STY)]PVAGGT[Phospho (STY)]PT[Phospho (STY)]ENGS[Phospho (STY)]DFGEGADIADER_	HRK1	HAL protein kinase	#N/A	#N/A	#N/A	5.83841	4.57072	#N/A
CNAG_00745	_TFPPNLAFTPAVATPSSTSLKT[Phospho (STY)]T[Phospho (STY)]SPAPEAQEPQPR_	HRK1	HAL protein kinase	#N/A	#N/A	#N/A	#N/A	7.05156	#N/A
CNAG_00753	_HPS[Phospho (STY)]PLPT[Phospho (STY)]PLVSPLDDLTTQFSFTPNGSSTPDGVEPR_	-	hypothetical protein	2.20522	#N/A	1.91109	#N/A	#N/A	#N/A
CNAG_00753	_STALPS[Phospho (STY)]AANEASPSETISNLLIGQR_	-	hypothetical protein	#N/A	4.00746	3.76945	#N/A	#N/A	#N/A
CNAG_00753	_HPSPLPT[Phospho (STY)]PLVS[Phospho (STY)]PLDDLTTQFSFTPNGSSTPDGVEPR_	-	hypothetical protein	#N/A	#N/A	4.60381	#N/A	#N/A	#N/A
CNAG_00753	_STALPSAANEAS[Phospho (STY)]PSETISNLLIGQR_	-	hypothetical protein	#N/A	4.84981	5.24162	#N/A	#N/A	#N/A
CNAG_00753	_STALPSAANEASPSET[Phospho (STY)]ISNLLIGQR_	-	hypothetical protein	#N/A	5.54019	5.8931	#N/A	#N/A	#N/A
CNAG_00753	_SFS[Phospho (STY)]AGVMGAPR_	-	hypothetical protein	4.65044	4.87415	#N/A	#N/A	#N/A	#N/A
CNAG_00753	_LPT[Phospho (STY)]PVSPLSR_	-	hypothetical protein	#N/A	#N/A	#N/A	#N/A	1.435	#N/A
CNAG_00755	_QTQPTPLDS[Phospho (STY)]K_	-	hypothetical protein	#N/A	#N/A	#N/A	#N/A	6.81986	6.20645
CNAG_00756	_GTGTIWDEES[Phospho (STY)]ESESVGGGS[Phospho (STY)]VETER_	-	hypothetical protein	#N/A	#N/A	#N/A	5.70822	#N/A	#N/A
CNAG_00756	_GTGTIWDEESESES[Phospho (STY)]VGGGS[Phospho (STY)]VETER_	-	hypothetical protein	#N/A	#N/A	#N/A	#N/A	#N/A	6.55605
CNAG_00757	_MEALNFPEAVSTPPQYS[Phospho (STY)]PASSHPTPTTR_	DOA4	ubiquitin carboxyl-terminal hydrolase 8	#N/A	1.85547	1.94312	#N/A	#N/A	#N/A
CNAG_00757	_MEALNFPEAVSTPPQY[Phospho (STY)]SPASSHPTPTTR_	DOA4	ubiquitin carboxyl-terminal hydrolase 8	#N/A	#N/A	1.9644	#N/A	#N/A	#N/A
CNAG_00757	_QFVVTASSKPPPTPS[Phospho (STY)]QEKSPPSAPVNVQASGSSSR_	DOA4	ubiquitin carboxyl-terminal hydrolase 8	6.73172	6.71562	#N/A	#N/A	#N/A	#N/A
CNAG_00757	_GPS[Phospho (STY)]PPKPDVGSGVGLHR_	DOA4	ubiquitin carboxyl-terminal hydrolase 8	6.7873	6.83296	#N/A	#N/A	#N/A	#N/A
CNAG_00757	_MEALNFPEAVSTPPQYSPAS[Phospho (STY)]SHPTPTTR_	DOA4	ubiquitin carboxyl-terminal hydrolase 8	2.16083	#N/A	#N/A	#N/A	#N/A	#N/A
CNAG_00758	_TQPGSPANGVPS[Phospho (STY)]GATRPGAIDAPVKR_	-	regulatory protein Ral2	#N/A	#N/A	5.34623	#N/A	#N/A	#N/A
CNAG_00758	_DSTQPEQSSFGRPSSPTNSDLTSNY[Phospho (STY)]PQTPSGSLR_	-	regulatory protein Ral2	#N/A	5.27839	5.42827	#N/A	#N/A	1.56326
CNAG_00758	_TQPGSPANGVPSGAT[Phospho (STY)]RPGAIDAPVKR_	-	regulatory protein Ral2	#N/A	#N/A	6.54966	#N/A	#N/A	#N/A
CNAG_00758	_DSTQPEQSSFGRPSSPTNSDLTSNYPQT[Phospho (STY)]PSGSLR_	-	regulatory protein Ral2	#N/A	5.36553	#N/A	1.32318	#N/A	1.38849
CNAG_00758	_DSTQPEQS[Phospho (STY)]SFGRPSSPTNSDLTSNYPQTPSGSLR_	-	regulatory protein Ral2	-6.31307	#N/A	#N/A	1.47959	#N/A	1.60381
CNAG_00758	_DSTQPEQSSFGRPSS[Phospho (STY)]PTNSDLTSNYPQTPSGSLR_	-	regulatory protein Ral2	-6.1004	#N/A	#N/A	1.47959	#N/A	1.60381
CNAG_00758	_DSTQPEQSSFGRPS[Phospho (STY)]SPTNSDLTSNYPQTPSGSLR_	-	regulatory protein Ral2	#N/A	#N/A	#N/A	1.4796	#N/A	1.60343
CNAG_00758	_DSTQPEQSSFGRPSSPTNS[Phospho (STY)]DLTSNYPQTPSGSLR_	-	regulatory protein Ral2	#N/A	#N/A	#N/A	1.47959	#N/A	1.60381
CNAG_00758	_DSTQPEQSSFGRPSSPTNSDLT[Phospho (STY)]SNYPQTPSGSLR_	-	regulatory protein Ral2	#N/A	#N/A	#N/A	1.47959	#N/A	1.60381
CNAG_00758	_HFSINTQSSGASNPLS[Phospho (STY)]PINTEWSEETGGPLLR_	-	regulatory protein Ral2	#N/A	#N/A	#N/A	#N/A	#N/A	2.84784
CNAG_00758	_HFSINTQSSGASNPLSPINT[Phospho (STY)]EWSEETGGPLLR_	-	regulatory protein Ral2	#N/A	#N/A	#N/A	#N/A	#N/A	5.80638
CNAG_00758	_SSDRSLTS[Phospho (STY)]LQSVQSPSSLSSIPQR_	-	regulatory protein Ral2	#N/A	#N/A	#N/A	6.45615	5.72058	6.5291
CNAG_00758	_TPSVSSHS[Phospho (STY)]PSVFVPPPSLSLK_	-	regulatory protein Ral2	#N/A	#N/A	#N/A	2.22823	#N/A	1.81082
CNAG_00758	_TPSVSSHSPS[Phospho (STY)]VFVPPPSLSLK_	-	regulatory protein Ral2	#N/A	#N/A	#N/A	2.21766	1.13924	1.55877
CNAG_00760	_HLTTPFC[Carbamidomethyl (C)]DLPLSPES[Phospho (STY)]HMILPHLLALNSAK_	-	methylenetetrahydrofolate reductase	#N/A	3.64538	4.51691	1.06241	#N/A	1.38762
CNAG_00760	_HLTTPFC[Carbamidomethyl (C)]DLPLS[Phospho (STY)]PESHMILPHLLALNSAK_	-	methylenetetrahydrofolate reductase	#N/A	4.34506	#N/A	#N/A	#N/A	#N/A
CNAG_00760	_AVNGIPINGKADT[Phospho (STY)]AQSPAK_	-	methylenetetrahydrofolate reductase	#N/A	#N/A	#N/A	3.68777	#N/A	3.46753
CNAG_00764	_QMEMGDEPVAYLGGDDDYAS[Phospho (STY)]ADEGR_	-	ATP-dependent RNA helicase DBP4	#N/A	#N/A	3.63498	#N/A	#N/A	#N/A
CNAG_00766	_QSGVDTNAASS[Phospho (STY)]PDLQPASLENASEEKGLAEAK_	-	hypothetical protein	#N/A	#N/A	#N/A	#N/A	8.23183	9.04454
CNAG_00770	_YLGSGSKPSSSSGS[Phospho (STY)]YAR_	MSH2	DNA mismatch repair protein Msh2	6.82477	6.47346	6.16853	#N/A	#N/A	#N/A
CNAG_00770	_YLGS[Phospho (STY)]GSKPSSSSGSYAR_	MSH2	DNA mismatch repair protein Msh2	#N/A	5.45334	#N/A	#N/A	#N/A	#N/A
CNAG_00770	_LVNYSSMVEDTIDLDELANHNY[Phospho (STY)]VILPTIDEDLQR_	MSH2	DNA mismatch repair protein Msh2	#N/A	5.54782	#N/A	#N/A	#N/A	#N/A
CNAG_00772	_ILNDASSVES[Phospho (STY)]LK_	RAD23	UV excision repair protein Rad23	#N/A	#N/A	4.12423	#N/A	4.76993	#N/A
CNAG_00773	_SRPSRS[Phospho (STY)]QLLAIGDGSGSTDNYGGDEVAR_	-	hypothetical protein	#N/A	#N/A	3.4021	#N/A	#N/A	#N/A
CNAG_00773	_NGLILPMDQTFSLGQRDY[Phospho (STY)]INSTTHALSSLTLDHTR_	-	hypothetical protein	#N/A	#N/A	5.71904	#N/A	#N/A	#N/A
CNAG_00773	_SQLLAIGDGSGST[Phospho (STY)]DNYGGDEVAR_	-	hypothetical protein	#N/A	6.74316	6.32789	#N/A	#N/A	#N/A
CNAG_00773	_NTALLNSPLFAQPT[Phospho (STY)]SPSVSGSTSKAQR_	-	hypothetical protein	#N/A	6.65627	#N/A	-6.34991	#N/A	#N/A
CNAG_00773	_NGLILPMDQTFSLGQRDYINSTTHALSSLT[Phospho (STY)]LDHTR_	-	hypothetical protein	7.43135	7.91649	#N/A	#N/A	#N/A	#N/A
CNAG_00773	_S[Phospho (STY)]RPSRSQLLAIGDGSGSTDNYGGDEVAR_	-	hypothetical protein	6.26473	#N/A	#N/A	#N/A	7.5906	#N/A
CNAG_00774	_GKVVDLSALC[Carbamidomethyl (C)]DALESDHLAGAAVDVFPKEPGS[Phospho (STY)]NGPGFNETLGDFIPR_	-	phosphoglycerate dehydrogenase	#N/A	5.17086	3.79828	#N/A	#N/A	#N/A
CNAG_00774	_ASSFSFSTSPS[Phospho (STY)]TSYLR_	-	phosphoglycerate dehydrogenase	#N/A	6.54739	5.57297	#N/A	#N/A	#N/A
CNAG_00774	_NAS[Phospho (STY)]GAFQGIAR_	-	phosphoglycerate dehydrogenase	9.65075	9.60143	9.43079	#N/A	#N/A	#N/A
CNAG_00774	_AS[Phospho (STY)]SFSFSTSPSTSYLR_	-	phosphoglycerate dehydrogenase	#N/A	1.01518	#N/A	#N/A	#N/A	#N/A
CNAG_00774	_ASSFS[Phospho (STY)]FSTSPSTSYLR_	-	phosphoglycerate dehydrogenase	#N/A	1.0152	#N/A	#N/A	#N/A	#N/A
CNAG_00774	_ASS[Phospho (STY)]FS[Phospho (STY)]FSTS[Phospho (STY)]PSTSYLR_	-	phosphoglycerate dehydrogenase	#N/A	5.96675	#N/A	#N/A	#N/A	#N/A
CNAG_00777	_QS[Phospho (STY)]PANNAPPATR_	-	CCR4-NOT transcriptional complex subunit CAF120	#N/A	#N/A	1.58826	#N/A	#N/A	#N/A
CNAG_00777	_YDYMQPGNAGMGSEASS[Phospho (STY)]AR_	-	CCR4-NOT transcriptional complex subunit CAF120	#N/A	#N/A	3.62778	#N/A	#N/A	#N/A
CNAG_00777	_GS[Phospho (STY)]PLAPQGQQQQSQQPR_	-	CCR4-NOT transcriptional complex subunit CAF120	#N/A	3.8184	4.21733	#N/A	#N/A	#N/A
CNAG_00777	_PISTLAYNNNDGSYPIPGPRQS[Phospho (STY)]PANNAPPATR_	-	CCR4-NOT transcriptional complex subunit CAF120	#N/A	#N/A	6.70828	#N/A	#N/A	#N/A
CNAG_00777	_AVSPQRPT[Phospho (STY)]INTNFDGQGGLVNAVTNGNQEAPGVGK_	-	CCR4-NOT transcriptional complex subunit CAF120	7.68159	7.01636	7.02829	7.5661	#N/A	#N/A
CNAG_00777	_TANSAFT[Phospho (STY)]VVGLGGAGGSGDR_	-	CCR4-NOT transcriptional complex subunit CAF120	7.18158	6.65029	7.03517	#N/A	#N/A	#N/A
CNAG_00777	_APEQASHET[Phospho (STY)]PQSATPMNAR_	-	CCR4-NOT transcriptional complex subunit CAF120	8.25585	6.6082	7.7012	#N/A	#N/A	#N/A
CNAG_00777	_GS[Phospho (STY)]SGEDLSQRVN_	-	CCR4-NOT transcriptional complex subunit CAF120	5.52675	4.78584	#N/A	4.5712	#N/A	#N/A
CNAG_00777	_NDIAPSSQESHSIYS[Phospho (STY)]QDTGATPTPVR_	-	CCR4-NOT transcriptional complex subunit CAF120	5.31624	5.89362	#N/A	6.4623	#N/A	#N/A
CNAG_00777	_S[Phospho (STY)]GVINGVQGKGSPLAPQGQQQQSQQPR_	-	CCR4-NOT transcriptional complex subunit CAF120	6.63504	#N/A	#N/A	#N/A	#N/A	#N/A
CNAG_00777	_QDGNFRLPPLS[Phospho (STY)]FNEASQDPNLPR_	-	CCR4-NOT transcriptional complex subunit CAF120	9.81881	#N/A	#N/A	#N/A	#N/A	#N/A
CNAG_00777	_PSPHMQPAPPLPTEPEQPDSDEGLPHPS[Phospho (STY)]ILAFPIAHGQK_	-	CCR4-NOT transcriptional complex subunit CAF120	#N/A	#N/A	#N/A	#N/A	#N/A	3.42963
CNAG_00777	_SASMPMQPPAPGT[Phospho (STY)]TPNGGSGSPRR_	-	CCR4-NOT transcriptional complex subunit CAF120	#N/A	#N/A	#N/A	5.66009	#N/A	#N/A
CNAG_00778	_AQSSEPGDTS[Phospho (STY)]SSQIAPHTAYR_	-	hypothetical protein	#N/A	#N/A	-1.2246	7.15528	6.55987	6.65001
CNAG_00778	_AQSSEPGDTSSS[Phospho (STY)]QIAPHTAYR_	-	hypothetical protein	#N/A	#N/A	-1.17266	#N/A	5.92298	6.38083
CNAG_00778	_AQSSEPGDT[Phospho (STY)]SSSQIAPHTAYR_	-	hypothetical protein	#N/A	#N/A	-1.10097	7.10105	5.82459	6.60979
CNAG_00778	_S[Phospho (STY)]GGPS[Phospho (STY)]PLS[Phospho (STY)]QGLISATGK_	-	hypothetical protein	1.97556	#N/A	2.38859	#N/A	#N/A	1.9404
CNAG_00778	_SGGPS[Phospho (STY)]PLSQGLISATGK_	-	hypothetical protein	2.77721	1.25872	3.12242	#N/A	#N/A	#N/A
CNAG_00778	_SGGPSPLS[Phospho (STY)]QGLISATGK_	-	hypothetical protein	2.592	#N/A	3.12358	#N/A	#N/A	#N/A
CNAG_00778	_KPSMPAPIPSGNLTT[Phospho (STY)]SPIPPR_	-	hypothetical protein	#N/A	5.26114	5.48176	#N/A	#N/A	#N/A
CNAG_00778	_TSSFLSQS[Phospho (STY)]GR_	-	hypothetical protein	6.61093	7.03023	6.8187	#N/A	#N/A	#N/A
CNAG_00778	_RSGGPSPLS[Phospho (STY)]QGLISATGK_	-	hypothetical protein	7.53007	#N/A	8.02489	#N/A	#N/A	#N/A
CNAG_00778	_RS[Phospho (STY)]GGPSPLSQGLISATGK_	-	hypothetical protein	7.80119	5.79652	8.32652	7.79475	6.51304	7.78313
CNAG_00778	_RSGGPS[Phospho (STY)]PLSQGLISATGK_	-	hypothetical protein	8.55283	6.49582	9.00026	5.76422	3.81745	5.78086
CNAG_00778	_EYRGEGEGTPNS[Phospho (STY)]QLATSPLAQGQGYNGR_	-	hypothetical protein	-1.50083	11.2832	#N/A	#N/A	#N/A	#N/A
CNAG_00778	_AQSSEPGDTSSSQIAPHTAY[Phospho (STY)]R_	-	hypothetical protein	#N/A	#N/A	#N/A	6.97315	5.9153	6.02199
CNAG_00778	_EY[Phospho (STY)]RGEGEGTPNSQLATSPLAQGQGYNGR_	-	hypothetical protein	#N/A	#N/A	#N/A	7.0387	6.89633	7.2553
CNAG_00778	_MAGS[Phospho (STY)]LGEMAIPSR_	-	hypothetical protein	#N/A	#N/A	#N/A	5.06793	#N/A	#N/A
CNAG_00778	_QQAATAGSFAS[Phospho (STY)]AGSFSR_	-	hypothetical protein	#N/A	#N/A	#N/A	6.35602	#N/A	5.09091
CNAG_00779	_GSVSSETFKEPT[Phospho (STY)]QREDSK_	RPL27	large subunit ribosomal protein L27e	6.83578	#N/A	6.62094	#N/A	#N/A	#N/A
CNAG_00779	_GSVSS[Phospho (STY)]ETFKEPTQR_	RPL27	large subunit ribosomal protein L27e	#N/A	4.78653	#N/A	#N/A	#N/A	#N/A
CNAG_00780	_QANLASPDPLDS[Phospho (STY)]LAK_	-	hypothetical protein	6.22959	#N/A	#N/A	#N/A	#N/A	#N/A
CNAG_00782	_RKSFVGT[Phospho (STY)]PNWMAPEVILGR_	SPS1	STE/STE20/Fray protein kinase	#N/A	1.13282	#N/A	#N/A	#N/A	#N/A
CNAG_00782	_RKS[Phospho (STY)]FVGTPNWMAPEVILGR_	SPS1	STE/STE20/Fray protein kinase	#N/A	1.18143	#N/A	#N/A	#N/A	#N/A
CNAG_00785	_[Acetyl (Protein N-term)]SDT[Phospho (STY)]KGAAEQGLQMDGDLINSNWNEVVDNFDDM[Oxidation (M)]KLK_	-	ATP-dependent RNA helicase eIF4A	#N/A	#N/A	#N/A	#N/A	1.10559	#N/A
CNAG_00787	_VSQLALPS[Phospho (STY)]LINR_	-	hypothetical protein	#N/A	#N/A	6.08366	#N/A	#N/A	#N/A
CNAG_00787	_TIFQM[Oxidation (M)]LDGAC[Carbamidomethyl (C)]QDKFTS[Phospho (STY)]GNDLS[Phospho (STY)]AEPQRPS[Phospho (STY)]VLSNK_	-	hypothetical protein	#N/A	#N/A	#N/A	#N/A	#N/A	5.56987
CNAG_00788	_ASKITPFHY[Phospho (STY)]SHQGSLAYIGSEK_	NDH1	NADH dehydrogenase	#N/A	#N/A	#N/A	7.35309	#N/A	#N/A
CNAG_00792	_RLDAIVAEESAVQSS[Phospho (STY)]ASSALGSALSSANVR_	-	ATP-binding cassette transporter	#N/A	#N/A	1.02814	#N/A	#N/A	#N/A
CNAG_00792	_RLDAIVAEESAVQS[Phospho (STY)]SASSALGSALSSANVR_	-	ATP-binding cassette transporter	#N/A	1.34421	1.46674	#N/A	#N/A	#N/A
CNAG_00797	_GKT[Phospho (STY)]EVAPGVHHVHPLPDSVPESEDLFAPPPR_	ACS1	acetyl-CoA synthetase	#N/A	#N/A	#N/A	1.31555	#N/A	#N/A
CNAG_00800	_AIS[Phospho (STY)]PEC[Carbamidomethyl (C)]EGK_	-	nicotinamidase	#N/A	#N/A	4.88388	#N/A	#N/A	#N/A
CNAG_00802	_LHY[Phospho (STY)]LPPTTLNPDPATTHLAPPPLPHNFLISPPGSPPEGWEPAAEEAPNR_	CBP1	calcineurin-binding protein	#N/A	#N/A	1.50807	#N/A	#N/A	#N/A
CNAG_00802	_LHYLPPTTLNPDPATTHLAPPPLPHNFLIS[Phospho (STY)]PPGSPPEGWEPAAEEAPNR_	CBP1	calcineurin-binding protein	#N/A	#N/A	1.68154	#N/A	#N/A	#N/A
CNAG_00803	_HKLSSNS[Phospho (STY)]IS[Phospho (STY)]QLVKPMVVNGR_	-	solute carrier family 24 (sodium/potassium/calcium exchanger), member 6	#N/A	#N/A	-2.75561	#N/A	#N/A	3.5835
CNAG_00803	_SNSPGGTPT[Phospho (STY)]PGGGR_	-	solute carrier family 24 (sodium/potassium/calcium exchanger), member 6	#N/A	#N/A	4.75534	#N/A	#N/A	#N/A
CNAG_00803	_HKLSS[Phospho (STY)]NS[Phospho (STY)]ISQLVKPMVVNGR_	-	solute carrier family 24 (sodium/potassium/calcium exchanger), member 6	-2.60631	-1.71262	#N/A	4.6657	3.82783	#N/A
CNAG_00803	_EQAIFLTPGSETPT[Phospho (STY)]R_	-	solute carrier family 24 (sodium/potassium/calcium exchanger), member 6	5.84222	6.47582	#N/A	#N/A	#N/A	-3.06725
CNAG_00807	_SQLQTQPSTSTVQPQYS[Phospho (STY)]PTAQAGTNQEAK_	-	hypothetical protein	5.00736	#N/A	3.94381	#N/A	#N/A	#N/A
CNAG_00807	_SQLQTQPSTSTVQPQY[Phospho (STY)]SPTAQAGTNQEAK_	-	hypothetical protein	#N/A	#N/A	5.97118	#N/A	#N/A	#N/A
CNAG_00807	_PYLALAPS[Phospho (STY)]PISSMSPSAADR_	-	hypothetical protein	#N/A	7.32533	#N/A	#N/A	#N/A	#N/A
CNAG_00807	_IPWGS[Phospho (STY)]SPNVDTAGLGVASSQDKLSSR_	-	hypothetical protein	#N/A	#N/A	#N/A	#N/A	#N/A	5.84342
CNAG_00807	_VAGQQS[Phospho (STY)]PRPEPPTIPTPTSTSAPTPTPHSK_	-	hypothetical protein	#N/A	#N/A	#N/A	6.72038	6.95067	#N/A
CNAG_00808	_TVGATFSYDEFLAVLNRPDGWKPAGT[Phospho (STY)]ADEFIK_	-	myosin regulatory light chain cdc4	4.33722	4.59167	4.50763	#N/A	#N/A	#N/A
CNAG_00809	_NRAT[Phospho (STY)]PPAAVPPAAPAAY[Phospho (STY)]RPSPTGLPTPATTPPTR_	-	ATP-dependent RNA helicase DED1	#N/A	1.37898	#N/A	#N/A	#N/A	#N/A
CNAG_00809	_ATPPAAVPPAAPAAY[Phospho (STY)]RPSPTGLPTPATTPPTRHIVPAAVAEDDVGGWGAQPR_	-	ATP-dependent RNA helicase DED1	2.76704	#N/A	#N/A	#N/A	#N/A	#N/A
CNAG_00817	_LPVQPAGS[Phospho (STY)]PQLEAGASR_	-	hypothetical protein	5.28944	6.31302	5.57462	#N/A	3.82402	#N/A
CNAG_00817	_NDVTDEWERLPVQPAGS[Phospho (STY)]PQLEAGASR_	-	hypothetical protein	6.18991	6.17518	5.6941	#N/A	#N/A	#N/A
CNAG_00818	_GRPVRSPSSQGIS[Phospho (STY)]SVGPVWNTAVNSSESTSTNTQQK_	-	hypothetical protein	5.07306	#N/A	4.75042	#N/A	#N/A	#N/A
CNAG_00818	_GRPVRS[Phospho (STY)]PSSQGISSVGPVWNTAVNSSESTSTNTQQK_	-	hypothetical protein	6.20303	6.02846	6.20024	#N/A	#N/A	#N/A
CNAG_00830	_QPSGTPTSDLSVQQAS[Phospho (STY)]LQSLPSPR_	FZC38	hypothetical protein	#N/A	#N/A	5.44368	#N/A	#N/A	#N/A
CNAG_00830	_IS[Phospho (STY)]SSHSPNYENMTGERER_	FZC38	hypothetical protein	5.98724	7.39363	#N/A	6.75573	#N/A	6.54856
CNAG_00830	_ISS[Phospho (STY)]SHSPNYENMTGERER_	FZC38	hypothetical protein	#N/A	#N/A	#N/A	6.69822	#N/A	6.4524
CNAG_00837	_QGSIASSPVVT[Phospho (STY)]PR_	-	hypothetical protein	#N/A	#N/A	1.22041	#N/A	#N/A	#N/A
CNAG_00837	_VDDAS[Phospho (STY)]PTPHSR_	-	hypothetical protein	#N/A	#N/A	1.71368	#N/A	#N/A	#N/A
CNAG_00837	_VDDASPT[Phospho (STY)]PHSR_	-	hypothetical protein	2.43353	#N/A	2.52972	#N/A	3.97441	4.38969
CNAG_00845	_GAGDGEETNDGASVSS[Phospho (STY)]RDALEEER_	-	hypothetical protein	#N/A	3.13454	#N/A	-1.43019	-1.6506	-1.40911
CNAG_00845	_RGAGDGEETNDGAS[Phospho (STY)]VSS[Phospho (STY)]RDALEEER_	-	hypothetical protein	1.75522	#N/A	#N/A	#N/A	#N/A	#N/A
CNAG_00848	_QAPTPS[Phospho (STY)]KTPK_	-	hypothetical protein, variant 2	#N/A	6.2522	#N/A	#N/A	#N/A	#N/A
CNAG_00848	_EGQKEGPFS[Phospho (STY)]DFQPATVR_	-	hypothetical protein, variant 2	#N/A	6.98683	#N/A	#N/A	#N/A	#N/A
CNAG_00848	_DVGGKTSQAAQNPT[Phospho (STY)]TPK_	-	hypothetical protein, variant 2	#N/A	#N/A	#N/A	#N/A	5.85001	#N/A
CNAG_00848	_IKDADDRT[Phospho (STY)]IASVS[Phospho (STY)]EEDAK_	-	hypothetical protein, variant 2	#N/A	#N/A	#N/A	-7.20943	2.47037	-5.24272
CNAG_00851	_S[Phospho (STY)]SSFSSSSQPAK_	-	hypothetical protein	#N/A	#N/A	#N/A	#N/A	1.29197	#N/A
CNAG_00860	_HQFAASSQAFVPLLT[Phospho (STY)]PPISPDGAK_	-	hypothetical protein	#N/A	#N/A	1.05382	#N/A	#N/A	#N/A
CNAG_00860	_MNEGLQPVPY[Phospho (STY)]GPPSPSTPGK_	-	hypothetical protein	#N/A	#N/A	1.17374	#N/A	#N/A	#N/A
CNAG_00860	_MNEGLQPVPYGPPSPS[Phospho (STY)]TPGK_	-	hypothetical protein	#N/A	#N/A	1.29382	#N/A	#N/A	#N/A
CNAG_00860	_HQFAASSQAFVPLLTPPIS[Phospho (STY)]PDGAK_	-	hypothetical protein	1.41502	1.14802	1.31238	#N/A	#N/A	#N/A
CNAG_00860	_M[Oxidation (M)]NEGLQPVPY[Phospho (STY)]GPPSPSTPGK_	-	hypothetical protein	#N/A	5.26016	5.79158	#N/A	#N/A	#N/A
CNAG_00860	_M[Oxidation (M)]NEGLQPVPYGPPS[Phospho (STY)]PSTPGK_	-	hypothetical protein	#N/A	5.68167	5.79837	#N/A	#N/A	#N/A
CNAG_00860	_S[Phospho (STY)]ISETSTEKGATTPDFVFR_	-	hypothetical protein	#N/A	#N/A	7.21516	#N/A	#N/A	#N/A
CNAG_00860	_IKS[Phospho (STY)]ISET[Phospho (STY)]STEK_	-	hypothetical protein	4.58794	6.06715	#N/A	#N/A	#N/A	#N/A
CNAG_00860	_AIELDANGHKPFC[Carbamidomethyl (C)]LS[Phospho (STY)]EIGEVDISEDDDPALQDPFGHIK_	-	hypothetical protein	#N/A	#N/A	#N/A	#N/A	#N/A	2.02834
CNAG_00860	_FGGS[Phospho (STY)]NHDYR_	-	hypothetical protein	#N/A	#N/A	#N/A	#N/A	1.22423	#N/A
CNAG_00866	_EGC[Carbamidomethyl (C)]GGLGEQIGHQNLGS[Phospho (STY)]SDIALK_	-	transketolase, variant	#N/A	5.1223	5.12265	#N/A	#N/A	#N/A
CNAG_00872	_PSSSTTPIVVS[Phospho (STY)]DDS[Phospho (STY)]DADDFFPR_	-	ATP-dependent DNA helicase	#N/A	6.46838	6.16839	#N/A	#N/A	#N/A
CNAG_00874	_VFS[Phospho (STY)]PADYKNEAFEAYYK_	-	multisite-specific tRNA:(cytosine-C5)- methyltransferase	#N/A	1.08574	1.75165	#N/A	#N/A	#N/A
CNAG_00879	_KDTIGYKS[Phospho (STY)]SPFPLK_	-	Glutamate dehydrogenase	#N/A	#N/A	1.18583	#N/A	#N/A	#N/A
CNAG_00879	_KDTIGYKSS[Phospho (STY)]PFPLK_	-	Glutamate dehydrogenase	#N/A	#N/A	1.35762	#N/A	#N/A	#N/A
CNAG_00879	_DTIGY[Phospho (STY)]KSSPFPLK_	-	Glutamate dehydrogenase	#N/A	#N/A	1.78346	#N/A	#N/A	#N/A
CNAG_00879	_S[Phospho (STY)]SPFPLKADQQAAVTR_	-	Glutamate dehydrogenase	#N/A	#N/A	1.84727	#N/A	#N/A	#N/A
CNAG_00879	_SS[Phospho (STY)]PFPLKADQQAAVTR_	-	Glutamate dehydrogenase	#N/A	#N/A	1.85817	#N/A	#N/A	#N/A
CNAG_00879	_VLAESGAHISRPGSDLS[Phospho (STY)]S[Phospho (STY)]NR_	-	Glutamate dehydrogenase	#N/A	#N/A	2.02053	#N/A	#N/A	#N/A
CNAG_00879	_MLYINFAM[Oxidation (M)]THYPVADEASQLTPTLS[Phospho (STY)]FQR_	-	Glutamate dehydrogenase	#N/A	#N/A	2.11251	#N/A	#N/A	#N/A
CNAG_00879	_M[Oxidation (M)]LYINFAMTHYPVADEASQLTPTLS[Phospho (STY)]FQR_	-	Glutamate dehydrogenase	1.69019	#N/A	2.14092	#N/A	#N/A	#N/A
CNAG_00879	_MLYINFAMTHYPVADEASQLTPTLS[Phospho (STY)]FQR_	-	Glutamate dehydrogenase	#N/A	#N/A	2.16822	#N/A	#N/A	#N/A
CNAG_00879	_MLYINFAMTHYPVADEASQLTPT[Phospho (STY)]LSFQR_	-	Glutamate dehydrogenase	#N/A	#N/A	2.20542	#N/A	#N/A	1.86502
CNAG_00879	_MLYINFAM[Oxidation (M)]THYPVADEASQLTPT[Phospho (STY)]LSFQR_	-	Glutamate dehydrogenase	1.86784	1.05	2.25269	#N/A	4.69667	4.63172
CNAG_00879	_MLYINFAMT[Phospho (STY)]HYPVADEASQLTPTLSFQR_	-	Glutamate dehydrogenase	#N/A	#N/A	2.2911	#N/A	#N/A	#N/A
CNAG_00879	_DTIGYKSS[Phospho (STY)]PFPLK_	-	Glutamate dehydrogenase	#N/A	#N/A	2.29866	#N/A	#N/A	#N/A
CNAG_00879	_VLAES[Phospho (STY)]GAHISRPGSDLSSNR_	-	Glutamate dehydrogenase	#N/A	#N/A	2.33816	#N/A	#N/A	#N/A
CNAG_00879	_S[Phospho (STY)]SPFPLK_	-	Glutamate dehydrogenase	#N/A	#N/A	2.58977	#N/A	#N/A	#N/A
CNAG_00879	_SS[Phospho (STY)]PFPLK_	-	Glutamate dehydrogenase	#N/A	#N/A	2.6158	#N/A	#N/A	#N/A
CNAG_00879	_VLAESGAHIS[Phospho (STY)]RPGS[Phospho (STY)]DLSSNR_	-	Glutamate dehydrogenase	#N/A	#N/A	2.69379	#N/A	#N/A	#N/A
CNAG_00879	_VLAES[Phospho (STY)]GAHIS[Phospho (STY)]RPGSDLSSNR_	-	Glutamate dehydrogenase	7.32784	#N/A	7.39329	#N/A	3.63924	#N/A
CNAG_00879	_C[Carbamidomethyl (C)]SFPASGPVKTPEGT[Phospho (STY)]TDIR_	-	Glutamate dehydrogenase	#N/A	#N/A	#N/A	5.10953	#N/A	5.31181
CNAG_00879	_S[Phospho (STY)]TPT[Phospho (STY)]QGAIQTPLPAQLSK_	-	Glutamate dehydrogenase	#N/A	#N/A	#N/A	#N/A	3.22732	#N/A
CNAG_00891	_S[Phospho (STY)]SVTGASTPLTSVSDDPTDAAEQMKK_	-	ATP-binding cassette, subfamily F, member 2	5.87048	5.79316	5.91053	#N/A	#N/A	#N/A
CNAG_00891	_SSVTGASTPLTSVS[Phospho (STY)]DDPTDAAEQMKK_	-	ATP-binding cassette, subfamily F, member 2	#N/A	#N/A	6.0493	#N/A	#N/A	#N/A
CNAG_00891	_AGSSKS[Phospho (STY)]S[Phospho (STY)]VTGASTPLTSVSDDPTDAAEQMK_	-	ATP-binding cassette, subfamily F, member 2	#N/A	#N/A	#N/A	#N/A	6.29794	8.76689
CNAG_00897	_LSDSSFTSFDHPGMS[Phospho (STY)]HR_	SKN1	putative glucosidase	6.06083	5.33459	5.79887	#N/A	#N/A	#N/A
CNAG_00897	_GSHNDAS[Phospho (STY)]VNSYGSSSSR_	SKN1	putative glucosidase	#N/A	#N/A	6.37956	#N/A	#N/A	#N/A
CNAG_00897	_LS[Phospho (STY)]DSSFTSFDHPGMSHR_	SKN1	putative glucosidase	#N/A	#N/A	#N/A	#N/A	6.21938	6.79879
CNAG_00897	_LSDS[Phospho (STY)]SFTSFDHPGMSHR_	SKN1	putative glucosidase	#N/A	#N/A	#N/A	#N/A	5.40829	#N/A
CNAG_00899	_AQS[Phospho (STY)]PASWAADMKDLLGGIGK_	-	hypothetical protein	#N/A	#N/A	3.12122	#N/A	#N/A	#N/A
CNAG_00904	_KDEETGVSGVNEQGEEGARGS[Phospho (STY)]AEGEPR_	-	aflatoxin efflux pump AFLT	#N/A	3.10943	2.94438	#N/A	#N/A	#N/A
CNAG_00904	_FSVEEDPLPTASAAIPLSAVAHT[Phospho (STY)]PGDQSSVQGTGGK_	-	aflatoxin efflux pump AFLT	#N/A	4.89974	#N/A	#N/A	#N/A	#N/A
CNAG_00904	_KDEETGVS[Phospho (STY)]GVNEQGEEGARGSAEGEPR_	-	aflatoxin efflux pump AFLT	1.04182	#N/A	#N/A	#N/A	#N/A	#N/A
CNAG_00904	_ALSENSAMVSPTTTIS[Phospho (STY)]VDGDREK_	-	aflatoxin efflux pump AFLT	#N/A	#N/A	#N/A	#N/A	#N/A	1.04302
CNAG_00906	_SIGTVGSKGT[Phospho (STY)]IGMR_	-	nucleolar pre-ribosomal-associated protein 1, variant	6.61188	6.36742	6.08663	#N/A	#N/A	#N/A
CNAG_00906	_SVKDALATGSPQAFVS[Phospho (STY)]FR_	-	nucleolar pre-ribosomal-associated protein 1, variant	#N/A	#N/A	#N/A	#N/A	#N/A	6.52235
CNAG_00914	_VGANSPTGGS[Phospho (STY)]YASFSSGNR_	KRE6	glucosidase	#N/A	#N/A	1.22493	#N/A	#N/A	#N/A
CNAG_00914	_VGANS[Phospho (STY)]PTGGSYASFSSGNR_	KRE6	glucosidase	#N/A	#N/A	1.24123	#N/A	#N/A	#N/A
CNAG_00914	_[Acetyl (Protein N-term)]MQYGSQSPTLGREPLLAS[Phospho (STY)]VQNPGMSQR_	KRE6	glucosidase	#N/A	5.42245	4.85912	#N/A	#N/A	#N/A
CNAG_00914	_QY[Phospho (STY)]GSQSPTLGREPLLASVQNPGMSQR_	KRE6	glucosidase	#N/A	#N/A	5.05111	#N/A	#N/A	#N/A
CNAG_00914	_MQY[Phospho (STY)]GSQSPTLGREPLLASVQNPGMSQR_	KRE6	glucosidase	5.7	#N/A	5.22527	#N/A	#N/A	#N/A
CNAG_00914	_FGPTAHLNPGPVAGVGEAGALPSGT[Phospho (STY)]Y[Phospho (STY)]AQGPIDDDDDMDDHLHTFTAAEK_	KRE6	glucosidase	5.16929	#N/A	5.79244	#N/A	#N/A	#N/A
CNAG_00914	_MQYGSQS[Phospho (STY)]PTLGREPLLASVQNPGMSQR_	KRE6	glucosidase	6.81608	7.15884	#N/A	#N/A	#N/A	#N/A
CNAG_00914	_MQYGS[Phospho (STY)]QSPTLGR_	KRE6	glucosidase	2.68458	#N/A	#N/A	#N/A	#N/A	#N/A
CNAG_00914	_[Acetyl (Protein N-term)]MQYGSQS[Phospho (STY)]PTLGR_	KRE6	glucosidase	#N/A	#N/A	#N/A	#N/A	#N/A	4.76206
CNAG_00916	_DPSFSTVDLKPVIYT[Phospho (STY)]PDALPMYQEQGHR_	WDP2	transcription factor	#N/A	1.6057	1.21434	#N/A	#N/A	#N/A
CNAG_00916	_KAEES[Phospho (STY)]DVSDDEQEAEEEVDRLPISHEIILK_	WDP2	transcription factor	#N/A	#N/A	1.81037	#N/A	#N/A	#N/A
CNAG_00917	_SAVEFEQNFPVAY[Phospho (STY)]PQPGMASSPPR_	-	alkylbase DNA N-glycosylase	#N/A	6.46978	5.86934	#N/A	#N/A	#N/A
CNAG_00917	_S[Phospho (STY)]AVEFEQNFPVAYPQPGMASSPPR_	-	alkylbase DNA N-glycosylase	#N/A	6.86509	6.23766	#N/A	#N/A	-9.36489
CNAG_00923	_DEGISGNGEASMEGS[Phospho (STY)]HETLAIPESWTR_	-	membrane protein	3.3912	#N/A	3.61121	#N/A	#N/A	#N/A
CNAG_00923	_GRASSNIDQSAIGASEVGQGSS[Phospho (STY)]APVPPGVGGAL_	-	membrane protein	#N/A	#N/A	#N/A	5.3595	#N/A	#N/A
CNAG_00926	_WPIDKLEEYT[Phospho (STY)]TGQSDIIISNSEFSSR_	-	alpha-1,3/alpha-1,6-mannosyltransferase	#N/A	#N/A	7.15285	#N/A	#N/A	#N/A
CNAG_00928	_RS[Phospho (STY)]PDSSAVSDAYAEK_	-	peptidase	5.78311	6.74484	6.01599	#N/A	#N/A	#N/A
CNAG_00928	_HHAEKES[Phospho (STY)]SPIDDGPFAGLSESAPNANSR_	-	peptidase	6.54598	7.11667	6.63481	#N/A	#N/A	#N/A
CNAG_00928	_HHAEKESSPIDDGPFAGLS[Phospho (STY)]ESAPNANSR_	-	peptidase	9.19716	9.37629	9.08365	#N/A	#N/A	#N/A
CNAG_00928	_THISPSHGT[Phospho (STY)]HLR_	-	peptidase	#N/A	#N/A	#N/A	#N/A	5.46399	#N/A
CNAG_00930	_FTSMDEMGGFEPT[Phospho (STY)]ATSGFIEISSIR_	-	Argininosuccinate synthase	#N/A	#N/A	#N/A	5.07683	3.23332	5.02463
CNAG_00930	_FTSMDEMGGFEPTATS[Phospho (STY)]GFIEISSIR_	-	Argininosuccinate synthase	#N/A	#N/A	#N/A	#N/A	#N/A	4.01506
CNAG_00931	_LTPSSPNQNQGSGSGS[Phospho (STY)]AGGLESFEAEGWGGK_	-	protein transporter	#N/A	#N/A	#N/A	#N/A	4.2227	#N/A
CNAG_00933	_KSS[Phospho (STY)]PFPSFEPHITLFAFIPLDTPIGEISNTLR_	-	hypothetical protein	#N/A	5.05935	#N/A	#N/A	#N/A	#N/A
CNAG_00970	_QSGSETESPGTPS[Phospho (STY)]VPGAEK_	-	phosphatidate cytidylyltransferase	#N/A	#N/A	#N/A	#N/A	5.80534	5.3228
CNAG_00971	_TSESEPNIS[Phospho (STY)]VPFSPIQQALPATPSR_	MON1	vacuolar fusion protein MON1	#N/A	#N/A	2.93861	#N/A	#N/A	#N/A
CNAG_00971	_SDDRSEIET[Phospho (STY)]VGAGGEMALPSGDAR_	MON1	vacuolar fusion protein MON1	-6.81014	#N/A	#N/A	#N/A	7.00005	6.08066
CNAG_00971	_S[Phospho (STY)]DDRSEIETVGAGGEMALPSGDAR_	MON1	vacuolar fusion protein MON1	#N/A	#N/A	#N/A	4.6379	5.67307	#N/A
CNAG_00971	_SDDRS[Phospho (STY)]EIETVGAGGEMALPSGDAR_	MON1	vacuolar fusion protein MON1	#N/A	#N/A	#N/A	6.79413	7.56294	#N/A
CNAG_00971	_SSRPSPLPYNT[Phospho (STY)]LLNAPADSPALR_	MON1	vacuolar fusion protein MON1	#N/A	#N/A	#N/A	5.07126	4.56927	#N/A
CNAG_00975	_ISISPY[Phospho (STY)]PPHAHDSAPLLRPAR_	-	hypothetical protein	#N/A	#N/A	4.85463	#N/A	#N/A	#N/A
CNAG_00976	_QTINEWDKPIFGIC[Carbamidomethyl (C)]MGHQVLGLAAGLEAY[Phospho (STY)]R_	-	carbamoyl-phosphate synthase, small subunit	#N/A	5.3533	#N/A	#N/A	#N/A	#N/A
CNAG_00976	_VYVT[Phospho (STY)]SQNHQYALR_	-	carbamoyl-phosphate synthase, small subunit	#N/A	#N/A	#N/A	#N/A	6.21168	#N/A
CNAG_00981	_GGRS[Phospho (STY)]LSTVLDEGTGESTSMR_	-	hypothetical protein	4.87141	3.68975	4.99788	#N/A	#N/A	#N/A
CNAG_00981	_GGRSLST[Phospho (STY)]VLDEGTGESTSMR_	-	hypothetical protein	5.19663	#N/A	5.42491	#N/A	#N/A	#N/A
CNAG_00981	_S[Phospho (STY)]LSTVLDEGTGESTSMRK_	-	hypothetical protein	5.56367	#N/A	5.53885	#N/A	#N/A	#N/A
CNAG_00981	_GGRSLS[Phospho (STY)]TVLDEGTGESTSMR_	-	hypothetical protein	8.31761	7.96939	9.30682	#N/A	#N/A	#N/A
CNAG_00981	_AFTHSPSGTNSMPLPEMARS[Phospho (STY)]PK_	-	hypothetical protein	#N/A	#N/A	#N/A	#N/A	4.98905	#N/A
CNAG_00981	_GSDSISKLSPPLS[Phospho (STY)]R_	-	hypothetical protein	#N/A	#N/A	#N/A	#N/A	5.83451	#N/A
CNAG_00981	_RAFTHSPS[Phospho (STY)]GT[Phospho (STY)]NSMPLPEMAR_	-	hypothetical protein	#N/A	#N/A	#N/A	#N/A	6.45465	#N/A
CNAG_00981	_RAFTHSPSGT[Phospho (STY)]NS[Phospho (STY)]MPLPEMAR_	-	hypothetical protein	#N/A	#N/A	#N/A	7.7603	#N/A	#N/A
CNAG_00982	_KS[Phospho (STY)]QVSIIGAAK_	-	hypothetical protein	#N/A	2.62832	#N/A	#N/A	#N/A	#N/A
CNAG_00983	_ATDQISIHDDLNEAIS[Phospho (STY)]TSLTSTPSLR_	-	hypothetical protein	#N/A	#N/A	1.06563	#N/A	#N/A	#N/A
CNAG_00983	_SSALSIPQPGLPSLS[Phospho (STY)]PTTSR_	-	hypothetical protein	#N/A	#N/A	3.11807	#N/A	#N/A	#N/A
CNAG_00983	_ENSQLASPRPSIDSAS[Phospho (STY)]SNTQPPSR_	-	hypothetical protein	#N/A	#N/A	4.64337	#N/A	#N/A	-1.40089
CNAG_00983	_DASVAGTPAPMSLNGT[Phospho (STY)]LFK_	-	hypothetical protein	#N/A	#N/A	5.74452	#N/A	#N/A	#N/A
CNAG_00983	_RSSMGS[Phospho (STY)]IVSANHPVPPSPNAIPR_	-	hypothetical protein	#N/A	1.07027	#N/A	#N/A	#N/A	#N/A
CNAG_00983	_ENSQLASPRPS[Phospho (STY)]IDSASSNTQPPSR_	-	hypothetical protein	#N/A	4.90227	#N/A	#N/A	#N/A	-1.49696
CNAG_00983	_DASVAGT[Phospho (STY)]PAPMSLNGTLFKNDDPEEEGWIAK_	-	hypothetical protein	6.60913	6.4669	#N/A	#N/A	#N/A	#N/A
CNAG_00983	_SSTILSLNPS[Phospho (STY)]PARPVTGKDHLTVSAR_	-	hypothetical protein	#N/A	6.98609	#N/A	-4.94841	#N/A	#N/A
CNAG_00983	_KPS[Phospho (STY)]TVAKPWDHLESLTK_	-	hypothetical protein	#N/A	#N/A	#N/A	#N/A	6.11625	#N/A
CNAG_00983	_SSTILS[Phospho (STY)]LNPSPARPVTGK_	-	hypothetical protein	#N/A	#N/A	#N/A	#N/A	#N/A	4.74041
CNAG_00984	_AFGPGT[Phospho (STY)]PIGR_	-	glucose and ribitol dehydrogenase	1.29885	#N/A	1.16027	#N/A	1.86912	1.30113
CNAG_00992	_HMPSRDNSPS[Phospho (STY)]GRS[Phospho (STY)]T[Phospho (STY)]DSTPAK_	-	homocitrate synthase, mitochondrial	1.32063	#N/A	1.30469	#N/A	#N/A	#N/A
CNAG_00992	_GLYGRAS[Phospho (STY)]DFLSNTSNWK_	-	homocitrate synthase, mitochondrial	5.69757	5.63246	5.95322	#N/A	#N/A	#N/A
CNAG_00992	_HMPS[Phospho (STY)]RDNSPSGRS[Phospho (STY)]T[Phospho (STY)]DSTPAK_	-	homocitrate synthase, mitochondrial	1.10825	#N/A	#N/A	#N/A	3.97329	#N/A
CNAG_00992	_HMPS[Phospho (STY)]RDNSPSGR_	-	homocitrate synthase, mitochondrial	2.3714	#N/A	#N/A	#N/A	#N/A	#N/A
CNAG_00992	_TQS[Phospho (STY)]MEDVDMILR_	-	homocitrate synthase, mitochondrial	#N/A	#N/A	#N/A	#N/A	3.41566	#N/A
CNAG_00996	_SYS[Phospho (STY)]DDDKQR_	PMT4	dolichyl-phosphate-mannose-protein mannosyltransferase	5.34724	#N/A	4.49626	#N/A	#N/A	#N/A
CNAG_00998	_DRS[Phospho (STY)]PSVSSQATR_	-	hypothetical protein	4.79421	4.19383	3.41012	#N/A	#N/A	#N/A
CNAG_00998	_EMPADS[Phospho (STY)]SPIDSENLFAIPR_	-	hypothetical protein	#N/A	5.49605	4.61044	#N/A	#N/A	#N/A
CNAG_00998	_EMPADSSPIDS[Phospho (STY)]ENLFAIPR_	-	hypothetical protein	#N/A	4.59476	#N/A	#N/A	#N/A	#N/A
CNAG_00998	_KSS[Phospho (STY)]ILTSPESHTSEINGSESK_	-	hypothetical protein	#N/A	#N/A	#N/A	#N/A	4.4416	#N/A
CNAG_00998	_SSILT[Phospho (STY)]SPESHTSEINGSESK_	-	hypothetical protein	#N/A	#N/A	#N/A	7.26976	#N/A	#N/A
CNAG_00998	_SSILTSPES[Phospho (STY)]HTSEINGSESK_	-	hypothetical protein	#N/A	#N/A	#N/A	7.90767	#N/A	#N/A
CNAG_00998	_SSILTSPESHTS[Phospho (STY)]EINGSESK_	-	hypothetical protein	#N/A	#N/A	#N/A	5.90208	#N/A	#N/A
CNAG_01000	_Y[Phospho (STY)]LTPLQAPQSLESVSKDEDPIYGPLGR_	-	nuclear pore complex protein Nup155	#N/A	#N/A	1.04869	#N/A	#N/A	#N/A
CNAG_01000	_YLT[Phospho (STY)]PLQAPQSLESVSKDEDPIYGPLGR_	-	nuclear pore complex protein Nup155	#N/A	#N/A	1.04869	#N/A	#N/A	#N/A
CNAG_01000	_YLTPLQAPQSLESVSKDEDPIY[Phospho (STY)]GPLGR_	-	nuclear pore complex protein Nup155	6.21079	#N/A	5.87202	#N/A	#N/A	#N/A
CNAG_01002	_[Acetyl (Protein N-term)]SNQPIAIPMDMEGT[Phospho (STY)]LEYTPSRHSQEVHHK_	-	hypothetical protein	#N/A	#N/A	#N/A	#N/A	#N/A	1.21577
CNAG_01002	_[Acetyl (Protein N-term)]SNQPIAIPMDMEGTLEYT[Phospho (STY)]PS[Phospho (STY)]RHSQEVHHK_	-	hypothetical protein	#N/A	#N/A	#N/A	#N/A	4.02869	4.7212
CNAG_01002	_[Acetyl (Protein N-term)]SNQPIAIPMDMEGTLEYT[Phospho (STY)]PSRHSQEVHHK_	-	hypothetical protein	#N/A	#N/A	#N/A	#N/A	#N/A	1.21579
CNAG_01002	_[Acetyl (Protein N-term)]SNQPIAIPMDMEGTLEYTPSRHS[Phospho (STY)]QEVHHK_	-	hypothetical protein	#N/A	#N/A	#N/A	#N/A	#N/A	1.21685
CNAG_01003	_Y[Phospho (STY)]YSISSSSK_	NCP1	NADPH-ferrihemoprotein reductase	#N/A	5.64903	#N/A	#N/A	5.09556	#N/A
CNAG_01006	_LGPTASPS[Phospho (STY)]ISPEKK_	-	hypothetical protein	6.70523	5.83999	6.23482	#N/A	#N/A	#N/A
CNAG_01006	_ETSS[Phospho (STY)]HPSPSEMAANFASR_	-	hypothetical protein	#N/A	9.80101	#N/A	8.78302	7.64155	8.54946
CNAG_01006	_ETSSHPSPSEMAANFASRPS[Phospho (STY)]QR_	-	hypothetical protein	7.32916	#N/A	#N/A	#N/A	#N/A	#N/A
CNAG_01006	_DRYEELYPAY[Phospho (STY)]NLLANK_	-	hypothetical protein	#N/A	#N/A	#N/A	#N/A	4.64994	#N/A
CNAG_01006	_VASGAMSAPMAVTASAPGAVWGSGT[Phospho (STY)]GTGSIPLK_	-	hypothetical protein	#N/A	#N/A	#N/A	#N/A	3.78768	#N/A
CNAG_01011	_LLPPS[Phospho (STY)]PLALPASSLPSVR_	-	hypothetical protein	#N/A	#N/A	5.29132	#N/A	#N/A	#N/A
CNAG_01011	_LEDEIPSLRS[Phospho (STY)]PIDSK_	-	hypothetical protein	5.16345	5.62517	5.59352	#N/A	#N/A	#N/A
CNAG_01011	_LEDEIPS[Phospho (STY)]LRSPIDSK_	-	hypothetical protein	#N/A	7.62695	6.7467	#N/A	#N/A	#N/A
CNAG_01011	_RYPVPQQT[Phospho (STY)]PTKPPSSK_	-	hypothetical protein	#N/A	#N/A	#N/A	5.29035	5.21916	5.32358
CNAG_01012	_LTPSKVS[Phospho (STY)]SPLTR_	-	hypothetical protein	5.87357	#N/A	4.19088	#N/A	#N/A	#N/A
CNAG_01012	_LTPSKVSSPLT[Phospho (STY)]R_	-	hypothetical protein	6.5955	4.42635	5.66196	#N/A	#N/A	#N/A
CNAG_01012	_GMKLT[Phospho (STY)]PSK_	-	hypothetical protein	#N/A	#N/A	7.31937	#N/A	#N/A	#N/A
CNAG_01012	_LTPSKVSS[Phospho (STY)]PLTR_	-	hypothetical protein	6.81146	#N/A	#N/A	#N/A	-1.59742	#N/A
CNAG_01014	_RAES[Phospho (STY)]GNLI_	ZFC4	hypothetical protein	2.18915	#N/A	#N/A	#N/A	#N/A	#N/A
CNAG_01015	_GRSSPYFTAGAAHHHLSSS[Phospho (STY)]QQILATLR_	-	cytoplasmic protein	1.17264	#N/A	#N/A	#N/A	2.30549	#N/A
CNAG_01015	_GRSSPY[Phospho (STY)]FTAGAAHHHLSSSQQILATLR_	-	cytoplasmic protein	1.34044	#N/A	#N/A	#N/A	2.22639	#N/A
CNAG_01015	_GRSSPYFTAGAAHHHLS[Phospho (STY)]SSQQILATLR_	-	cytoplasmic protein	#N/A	#N/A	#N/A	#N/A	4.39983	#N/A
CNAG_01016	_SMYIPPVAESVTSHS[Phospho (STY)]PLQDYFNLR_	SEA3	vacuolar membrane protein	#N/A	#N/A	1.0642	#N/A	#N/A	#N/A
CNAG_01016	_SMYIPPVAESVT[Phospho (STY)]SHSPLQDYFNLR_	SEA3	vacuolar membrane protein	#N/A	#N/A	1.06958	#N/A	#N/A	#N/A
CNAG_01016	_SMYIPPVAESVTSHSPLQDY[Phospho (STY)]FNLR_	SEA3	vacuolar membrane protein	#N/A	#N/A	1.07212	#N/A	#N/A	#N/A
CNAG_01016	_SMY[Phospho (STY)]IPPVAESVTSHSPLQDYFNLR_	SEA3	vacuolar membrane protein	#N/A	#N/A	5.97884	#N/A	#N/A	#N/A
CNAG_01016	_NFS[Phospho (STY)]RSPSMTR_	SEA3	vacuolar membrane protein	8.21867	8.0252	8.29574	#N/A	#N/A	#N/A
CNAG_01016	_RSSAS[Phospho (STY)]STPFQPSPLTALWPR_	SEA3	vacuolar membrane protein	#N/A	1.25261	#N/A	-1.15091	#N/A	-1.92269
CNAG_01016	_RSSASST[Phospho (STY)]PFQPSPLTALWPR_	SEA3	vacuolar membrane protein	#N/A	1.70651	#N/A	-1.64335	#N/A	-1.92353
CNAG_01016	_[Acetyl (Protein N-term)]MLSPANIPLPIS[Phospho (STY)]PALTASR_	SEA3	vacuolar membrane protein	#N/A	4.206	#N/A	#N/A	#N/A	#N/A
CNAG_01016	_TILGTSY[Phospho (STY)]EEQSSPSGMAIPALK_	SEA3	vacuolar membrane protein	1.10157	#N/A	#N/A	#N/A	#N/A	#N/A
CNAG_01016	_QS[Phospho (STY)]DSPKPIPGDK_	SEA3	vacuolar membrane protein	1.21286	#N/A	#N/A	#N/A	#N/A	#N/A
CNAG_01016	_AFPTSSMSPPPIVT[Phospho (STY)]PLRSSGPEK_	SEA3	vacuolar membrane protein	#N/A	#N/A	#N/A	#N/A	6.61563	#N/A
CNAG_01020	_GLPDGDSQERVDQADDDKPELS[Phospho (STY)]PYQALLATTVR_	-	hypothetical protein	#N/A	1.02016	1.22597	#N/A	#N/A	#N/A
CNAG_01020	_GLPDGDS[Phospho (STY)]QERVDQADDDKPELSPYQALLATTVR_	-	hypothetical protein	#N/A	1.18201	1.44458	#N/A	#N/A	#N/A
CNAG_01020	_GLPDGDSQERVDQADDDKPELSPY[Phospho (STY)]QALLATTVR_	-	hypothetical protein	#N/A	#N/A	1.72213	#N/A	#N/A	#N/A
CNAG_01020	_SLLGT[Phospho (STY)]NVALPGDDDEEGGSK_	-	hypothetical protein	#N/A	2.45451	3.70449	#N/A	#N/A	#N/A
CNAG_01020	_NY[Phospho (STY)]EEEKWGSPNDPETR_	-	hypothetical protein	#N/A	5.12252	4.82865	#N/A	#N/A	#N/A
CNAG_01020	_AAPVSPASS[Phospho (STY)]R_	-	hypothetical protein	#N/A	#N/A	6.60501	#N/A	#N/A	#N/A
CNAG_01020	_AAPVSPAS[Phospho (STY)]SR_	-	hypothetical protein	7.15363	#N/A	7.72579	#N/A	#N/A	#N/A
CNAG_01020	_RRS[Phospho (STY)]LLGTNVALPGDDDEEGGSK_	-	hypothetical protein	#N/A	1.07083	#N/A	#N/A	#N/A	#N/A
CNAG_01020	_RRSLLGT[Phospho (STY)]NVALPGDDDEEGGSK_	-	hypothetical protein	#N/A	1.14948	#N/A	#N/A	#N/A	#N/A
CNAG_01021	_SANSASQPAQPESLESSTILLPPS[Phospho (STY)]GGDASPSAGGGR_	-	ATP phosphoribosyltransferase	#N/A	#N/A	1.31018	#N/A	#N/A	#N/A
CNAG_01021	_RAPT[Phospho (STY)]VSPLDENGWVAVSAMVER_	-	ATP phosphoribosyltransferase	#N/A	#N/A	5.32069	#N/A	#N/A	#N/A
CNAG_01021	_RAPTVS[Phospho (STY)]PLDENGWVAVSAMVER_	-	ATP phosphoribosyltransferase	#N/A	#N/A	5.73074	#N/A	#N/A	#N/A
CNAG_01021	_SANSASQPAQPESLESST[Phospho (STY)]ILLPPSGGDASPSAGGGR_	-	ATP phosphoribosyltransferase	#N/A	6.93351	#N/A	#N/A	#N/A	#N/A
CNAG_01021	_[Acetyl (Protein N-term)]SANSASQPAQPESLESST[Phospho (STY)]ILLPPSGGDAS[Phospho (STY)]PSAGGGR_	-	ATP phosphoribosyltransferase	#N/A	#N/A	#N/A	5.04342	#N/A	#N/A
CNAG_01023	_EVVT[Phospho (STY)]PIS[Phospho (STY)]R_	SCC1	cohesin complex subunit SCC1	#N/A	#N/A	4.85298	1.37921	#N/A	1.19541
CNAG_01023	_HGSHDELSSHLGS[Phospho (STY)]NEFSGIDLGLNLEGDETIEYGR_	SCC1	cohesin complex subunit SCC1	#N/A	5.05848	5.46852	#N/A	#N/A	#N/A
CNAG_01023	_ATTELLTPPPPT[Phospho (STY)]PPQESISDLTPR_	SCC1	cohesin complex subunit SCC1	#N/A	#N/A	5.90714	#N/A	#N/A	#N/A
CNAG_01023	_RAT[Phospho (STY)]TELLTPPPPTPPQESISDLTPR_	SCC1	cohesin complex subunit SCC1	#N/A	5.99987	6.01009	#N/A	#N/A	#N/A
CNAG_01023	_RATTELLT[Phospho (STY)]PPPPTPPQESISDLTPR_	SCC1	cohesin complex subunit SCC1	6.03127	5.669	6.26961	#N/A	#N/A	#N/A
CNAG_01023	_APS[Phospho (STY)]IYGGSETATSR_	SCC1	cohesin complex subunit SCC1	#N/A	6.22776	6.54233	#N/A	#N/A	#N/A
CNAG_01023	_HGS[Phospho (STY)]HDELSSHLGSNEFSGIDLGLNLEGDETIEYGR_	SCC1	cohesin complex subunit SCC1	#N/A	6.70059	6.80807	#N/A	#N/A	#N/A
CNAG_01023	_HGSHDELSS[Phospho (STY)]HLGSNEFSGIDLGLNLEGDETIEYGR_	SCC1	cohesin complex subunit SCC1	#N/A	6.55262	6.83655	#N/A	#N/A	#N/A
CNAG_01023	_EVVTPIS[Phospho (STY)]R_	SCC1	cohesin complex subunit SCC1	6.37949	6.61492	7.06093	#N/A	#N/A	#N/A
CNAG_01023	_HGSHDELSSHLGSNEFS[Phospho (STY)]GIDLGLNLEGDETIEYGR_	SCC1	cohesin complex subunit SCC1	#N/A	7.11875	7.38053	#N/A	#N/A	#N/A
CNAG_01023	_RATT[Phospho (STY)]ELLT[Phospho (STY)]PPPPTPPQESIS[Phospho (STY)]DLT[Phospho (STY)]PR_	SCC1	cohesin complex subunit SCC1	#N/A	7.45324	7.41431	#N/A	#N/A	#N/A
CNAG_01023	_RATT[Phospho (STY)]ELLTPPPPTPPQESISDLTPR_	SCC1	cohesin complex subunit SCC1	7.04213	7.41018	7.47736	#N/A	#N/A	#N/A
CNAG_01023	_HGSHDELS[Phospho (STY)]SHLGSNEFSGIDLGLNLEGDETIEYGR_	SCC1	cohesin complex subunit SCC1	#N/A	4.42203	#N/A	#N/A	#N/A	#N/A
CNAG_01023	_ATTELLTPPPPTPPQESIS[Phospho (STY)]DLTPR_	SCC1	cohesin complex subunit SCC1	#N/A	5.5358	#N/A	#N/A	#N/A	#N/A
CNAG_01023	_GPSLAPSRAES[Phospho (STY)]IAR_	SCC1	cohesin complex subunit SCC1	#N/A	#N/A	#N/A	#N/A	4.78249	6.10534
CNAG_01025	_SSS[Phospho (STY)]PTIR_	-	hypothetical protein	#N/A	#N/A	#N/A	8.87735	#N/A	#N/A
CNAG_01029	_LAFTSRPPS[Phospho (STY)]R_	-	impact family protein	#N/A	#N/A	1.28737	#N/A	#N/A	#N/A
CNAG_01029	_LAFTS[Phospho (STY)]RPPSR_	-	impact family protein	#N/A	#N/A	1.4027	#N/A	#N/A	#N/A
CNAG_01029	_LAFTSRPPS[Phospho (STY)]RNSQLSDTPNTER_	-	impact family protein	#N/A	5.20743	3.66866	#N/A	#N/A	#N/A
CNAG_01029	_AADDT[Phospho (STY)]PPTEAMLR_	-	impact family protein	6.81765	#N/A	7.13203	#N/A	#N/A	#N/A
CNAG_01029	_RGSQQWT[Phospho (STY)]DAVWNAEIGFTPGER_	-	impact family protein	#N/A	1.06621	#N/A	-1.57746	#N/A	#N/A
CNAG_01029	_RGS[Phospho (STY)]QQWTDAVWNAEIGFTPGER_	-	impact family protein	#N/A	1.09164	#N/A	#N/A	#N/A	-1.43283
CNAG_01031	_LSHSVEGAAS[Phospho (STY)]HPAVR_	-	hypothetical protein	#N/A	2.45983	-5.1204	#N/A	#N/A	#N/A
CNAG_01031	_AVPAPVPT[Phospho (STY)]PADINNQR_	-	hypothetical protein	#N/A	5.49168	#N/A	#N/A	#N/A	7.29528
CNAG_01031	_SSNSNVASSPIHS[Phospho (STY)]NNPFISDNSPSK_	-	hypothetical protein	3.32852	#N/A	#N/A	-6.15131	#N/A	#N/A
CNAG_01035	_NIEITVMESY[Phospho (STY)]GVVKALEQSDIEK_	-	20S proteasome subunit alpha 4	#N/A	2.78331	#N/A	#N/A	#N/A	#N/A
CNAG_01035	_LAATQAGQASMAMGSSAPS[Phospho (STY)]GTQT[Phospho (STY)]PAGHPQEHASAPGGDSGVQ_	-	20S proteasome subunit alpha 4	#N/A	#N/A	#N/A	#N/A	#N/A	3.26581
CNAG_01051	_STAPFT[Phospho (STY)]PSQTSR_	NIP100	dynactin 1	#N/A	#N/A	5.15863	#N/A	#N/A	#N/A
CNAG_01053	_SSS[Phospho (STY)]QAVALR_	-	nuclear pore complex protein Nup160	#N/A	#N/A	#N/A	7.70958	6.20176	#N/A
CNAG_01058	_AS[Phospho (STY)]IDAQKR_	-	nitric oxide synthase-interacting protein	-4.56988	#N/A	-4.97827	6.31498	5.8265	5.12812
CNAG_01060	_ART[Phospho (STY)]PTPGR_	-	hypothetical protein	#N/A	5.67883	4.00878	#N/A	#N/A	#N/A
CNAG_01060	_S[Phospho (STY)]SGGAPDPYYYR_	-	hypothetical protein	#N/A	6.0745	5.59169	#N/A	#N/A	#N/A
CNAG_01060	_PHHS[Phospho (STY)]SYDRPYQPR_	-	hypothetical protein	#N/A	5.51119	#N/A	#N/A	#N/A	#N/A
CNAG_01060	_SRS[Phospho (STY)]PARAPER_	-	hypothetical protein	7.03013	5.55202	#N/A	#N/A	#N/A	#N/A
CNAG_01062	_HTS[Phospho (STY)]LES[Phospho (STY)]DSDKFLSVRPALR_	PSK201	CAMK/CAMKL/PASK protein kinase	1.11505	#N/A	1.36307	#N/A	#N/A	#N/A
CNAG_01062	_HT[Phospho (STY)]SLESDSDKFLSVR_	PSK201	CAMK/CAMKL/PASK protein kinase	4.14819	4.75875	4.40775	#N/A	#N/A	#N/A
CNAG_01062	_TLHESKEEATFSGGS[Phospho (STY)]SEDAAK_	PSK201	CAMK/CAMKL/PASK protein kinase	#N/A	5.53263	5.81718	-3.86123	#N/A	#N/A
CNAG_01062	_IDPDALESPS[Phospho (STY)]SADPVESSK_	PSK201	CAMK/CAMKL/PASK protein kinase	#N/A	#N/A	5.87954	#N/A	#N/A	#N/A
CNAG_01062	_STISAEYLGPEDYHT[Phospho (STY)]PDPGSPSSK_	PSK201	CAMK/CAMKL/PASK protein kinase	6.69544	#N/A	6.62312	#N/A	#N/A	#N/A
CNAG_01062	_STISAEYLGPEDYHTPDPGS[Phospho (STY)]PSSK_	PSK201	CAMK/CAMKL/PASK protein kinase	6.75001	6.69671	6.86338	#N/A	#N/A	#N/A
CNAG_01062	_GLAPPGS[Phospho (STY)]PRPGDAIPPK_	PSK201	CAMK/CAMKL/PASK protein kinase	7.9857	7.97339	8.33108	#N/A	#N/A	#N/A
CNAG_01062	_STISAEYLGPEDY[Phospho (STY)]HTPDPGSPSSK_	PSK201	CAMK/CAMKL/PASK protein kinase	#N/A	#N/A	8.75642	#N/A	#N/A	#N/A
CNAG_01062	_TLHESKEEATFSGGSS[Phospho (STY)]EDAAK_	PSK201	CAMK/CAMKL/PASK protein kinase	#N/A	4.5093	#N/A	#N/A	#N/A	#N/A
CNAG_01062	_HTS[Phospho (STY)]LESDSDKFLSVR_	PSK201	CAMK/CAMKL/PASK protein kinase	3.80031	4.81093	#N/A	#N/A	#N/A	#N/A
CNAG_01062	_TGSITAS[Phospho (STY)]PEPS[Phospho (STY)]PVAS[Phospho (STY)]HSASPIIAPR_	PSK201	CAMK/CAMKL/PASK protein kinase	7.0698	6.98986	#N/A	#N/A	#N/A	#N/A
CNAG_01062	_LDSTLSIAPSTGVPSEC[Carbamidomethyl (C)]GT[Phospho (STY)]PTEEK_	PSK201	CAMK/CAMKL/PASK protein kinase	1.06876	#N/A	#N/A	#N/A	#N/A	#N/A
CNAG_01062	_LDSTLSIAPSTGVPS[Phospho (STY)]EC[Carbamidomethyl (C)]GTPTEEK_	PSK201	CAMK/CAMKL/PASK protein kinase	1.07917	#N/A	#N/A	#N/A	#N/A	#N/A
CNAG_01062	_WDTFSGTLHYAS[Phospho (STY)]PEILR_	PSK201	CAMK/CAMKL/PASK protein kinase	#N/A	#N/A	#N/A	#N/A	3.53204	4.56924
CNAG_01063	_S[Phospho (STY)]TDLGLGMVAK_	KOG1	WD-repeat protein mip1	#N/A	#N/A	3.06867	#N/A	#N/A	#N/A
CNAG_01063	_ST[Phospho (STY)]DLGLGMVAK_	KOG1	WD-repeat protein mip1	#N/A	#N/A	5.74831	#N/A	#N/A	4.03464
CNAG_01082	_QHLSSS[Phospho (STY)]RPNS[Phospho (STY)]PIENHS[Phospho (STY)]PTS[Phospho (STY)]PGKPR_	-	hypothetical protein	1.26544	1.64484	1.06833	#N/A	#N/A	#N/A
CNAG_01082	_QHLSSSRPNSPIENHS[Phospho (STY)]PT[Phospho (STY)]S[Phospho (STY)]PGKPR_	-	hypothetical protein	2.26493	#N/A	1.5471	#N/A	#N/A	#N/A
CNAG_01082	_LT[Phospho (STY)]ASDKGDILSASLHSR_	-	hypothetical protein	#N/A	4.95267	4.90565	-8.00818	#N/A	#N/A
CNAG_01082	_QHLS[Phospho (STY)]S[Phospho (STY)]S[Phospho (STY)]RPNS[Phospho (STY)]PIENHSPTSPGKPR_	-	hypothetical protein	6.00264	6.37321	5.39205	#N/A	#N/A	#N/A
CNAG_01082	_VISLDELGTGT[Phospho (STY)]EKK_	-	hypothetical protein	3.19895	6.42481	6.80216	#N/A	3.40657	#N/A
CNAG_01082	_QHLSSSRPNS[Phospho (STY)]PIENHSPT[Phospho (STY)]S[Phospho (STY)]PGKPR_	-	hypothetical protein	#N/A	2.63616	#N/A	#N/A	#N/A	#N/A
CNAG_01082	_DTLTLDDRSQGSTSAPPT[Phospho (STY)]K_	-	hypothetical protein	6.90046	5.34563	#N/A	#N/A	#N/A	#N/A
CNAG_01082	_SGSIGSVTTDASRISSSPS[Phospho (STY)]AFR_	-	hypothetical protein	#N/A	6.96452	#N/A	#N/A	#N/A	#N/A
CNAG_01082	_AYTLPGLS[Phospho (STY)]TAISNGK_	-	hypothetical protein	#N/A	#N/A	#N/A	#N/A	7.41854	#N/A
CNAG_01082	_FSGQPLNDDESDDEEQENGDFT[Phospho (STY)]VIENDWR_	-	hypothetical protein	#N/A	#N/A	#N/A	6.69447	6.59298	6.91791
CNAG_01082	_NNPT[Phospho (STY)]SAATSEIGDGDAEGEEREER_	-	hypothetical protein	#N/A	#N/A	#N/A	#N/A	6.72607	6.76502
CNAG_01087	_TTKSLAPT[Phospho (STY)]LPDGAER_	-	hypothetical protein	-10.0161	-1.89271	-7.83635	6.1034	#N/A	5.55091
CNAG_01087	_TTKS[Phospho (STY)]LAPTLPDGAER_	-	hypothetical protein	-9.10871	-1.86173	-1.9511	#N/A	#N/A	6.34054
CNAG_01087	_FVLEEDKEEIEHHENLESS[Phospho (STY)]PNPAPM[Oxidation (M)]PTAAPVSTSASAPDGEHSVGEGPK_	-	hypothetical protein	6.47915	6.48049	6.66162	#N/A	#N/A	#N/A
CNAG_01087	_ISLLLYPTPQPPIEGKES[Phospho (STY)]ILEDHEPR_	-	hypothetical protein	#N/A	#N/A	#N/A	#N/A	1.71806	1.74699
CNAG_01087	_LRAPS[Phospho (STY)]LLPNR_	-	hypothetical protein	#N/A	#N/A	#N/A	#N/A	1.33321	1.1114
CNAG_01093	_SQEWEGES[Phospho (STY)]GEGSYQS_	-	hypothetical protein	#N/A	#N/A	#N/A	#N/A	5.43292	#N/A
CNAG_01094	_Y[Phospho (STY)]HDSPSPSSDYYDDRYR_	-	pre-mRNA-splicing factor CWC25	6.32635	#N/A	#N/A	#N/A	#N/A	#N/A
CNAG_01100	_SPNSHNSYGMPSTGSAMSS[Phospho (STY)]WEEVGKSDEVSK_	-	hypothetical protein	#N/A	#N/A	5.62237	#N/A	#N/A	#N/A
CNAG_01100	_GINSPQQQVPLVDRNTPS[Phospho (STY)]PLPTLGELR_	-	hypothetical protein	#N/A	#N/A	5.7728	#N/A	#N/A	#N/A
CNAG_01100	_SASASSSY[Phospho (STY)]NMTSNDYPSPTNGANPER_	-	hypothetical protein	#N/A	11.2132	8.05367	-10.2405	-1.98675	#N/A
CNAG_01100	_SAS[Phospho (STY)]ASSSYNMTSNDYPSPTNGANPER_	-	hypothetical protein	#N/A	#N/A	8.70093	7.30653	#N/A	6.30074
CNAG_01101	_YGKEEDT[Phospho (STY)]DDEAILSALSLASPK_	-	hypothetical protein	#N/A	#N/A	1.34231	#N/A	#N/A	#N/A
CNAG_01101	_SGRHS[Phospho (STY)]VAVGELNGPMTLR_	-	hypothetical protein	3.38482	3.97567	3.07614	#N/A	#N/A	#N/A
CNAG_01101	_S[Phospho (STY)]LTSHSQSISTPSPPR_	-	hypothetical protein	#N/A	5.23784	5.08592	#N/A	#N/A	#N/A
CNAG_01101	_SLTSHSQSIS[Phospho (STY)]TPSPPR_	-	hypothetical protein	#N/A	#N/A	5.46129	#N/A	#N/A	#N/A
CNAG_01101	_SLT[Phospho (STY)]SHSQSISTPSPPR_	-	hypothetical protein	#N/A	6.05213	5.50703	#N/A	#N/A	#N/A
CNAG_01101	_RTS[Phospho (STY)]NS[Phospho (STY)]S[Phospho (STY)]VESDDISGPLEAR_	-	hypothetical protein	#N/A	#N/A	5.72839	#N/A	#N/A	#N/A
CNAG_01101	_RTSNS[Phospho (STY)]S[Phospho (STY)]VESDDISGPLEAR_	-	hypothetical protein	#N/A	#N/A	6.23632	#N/A	#N/A	#N/A
CNAG_01101	_SLTSHSQS[Phospho (STY)]ISTPSPPRGALLTVSPPPTVR_	-	hypothetical protein	#N/A	#N/A	#N/A	#N/A	#N/A	5.54691
CNAG_01101	_SLTSHSQSISTPS[Phospho (STY)]PPRGALLTVSPPPTVR_	-	hypothetical protein	#N/A	#N/A	#N/A	5.47333	#N/A	5.97848
CNAG_01101	_SLTSHSQSISTPSPPRGALLT[Phospho (STY)]VSPPPTVR_	-	hypothetical protein	#N/A	#N/A	#N/A	#N/A	#N/A	6.00414
CNAG_01102	_GSAIINT[Phospho (STY)]SSVTAFKGSATMVDYASTK_	-	oxidoreductase	#N/A	#N/A	#N/A	7.2893	7.57359	7.87609
CNAG_01105	_AVS[Phospho (STY)]DPTSLQSFDKETISNLPGIGPAQFR_	-	hypothetical protein	#N/A	4.56642	4.17676	#N/A	#N/A	#N/A
CNAG_01105	_AVSDPTSLQSFDKETIS[Phospho (STY)]NLPGIGPAQFR_	-	hypothetical protein	#N/A	4.60032	4.391	#N/A	#N/A	#N/A
CNAG_01105	_SSIESGRPSSEFSRDS[Phospho (STY)]LDR_	-	hypothetical protein	#N/A	#N/A	8.29021	#N/A	#N/A	#N/A
CNAG_01105	_SAAGPSSPPAQT[Phospho (STY)]K_	-	hypothetical protein	#N/A	#N/A	#N/A	5.72017	#N/A	7.41862
CNAG_01115	_VNKNEQRPAFYMETTMIIAEELADDDSVMY[Phospho (STY)]VPVK_	-	hypothetical protein	#N/A	4.41201	2.27471	#N/A	#N/A	#N/A
CNAG_01115	_S[Phospho (STY)]VEEVSEPEEK_	-	hypothetical protein	#N/A	4.54329	5.3813	#N/A	#N/A	#N/A
CNAG_01115	_STVVVHKPFY[Phospho (STY)]AGDILSDDLK_	-	hypothetical protein	7.48263	7.50846	7.58202	#N/A	#N/A	#N/A
CNAG_01115	_ASTSHDDSGS[Phospho (STY)]QASSSLGVESSK_	-	hypothetical protein	#N/A	#N/A	#N/A	#N/A	3.48217	#N/A
CNAG_01115	_SQVSLISLPQSDRDPVS[Phospho (STY)]IK_	-	hypothetical protein	#N/A	#N/A	#N/A	3.83553	#N/A	#N/A
CNAG_01120	_FAMPAMS[Phospho (STY)]PTMTEGGIAQWK_	-	pyruvate dehydrogenase complex dihydrolipoamide acetyltransferase	4.05685	#N/A	4.57993	#N/A	#N/A	#N/A
CNAG_01120	_NYKPSASAPAAGKPAAIAADY[Phospho (STY)]EDIPTSNMR_	-	pyruvate dehydrogenase complex dihydrolipoamide acetyltransferase	#N/A	#N/A	#N/A	6.65887	#N/A	#N/A
CNAG_01123	_KAQDDLESESKS[Phospho (STY)]PAPQVVPR_	-	DRAP deaminase	#N/A	#N/A	5.10188	#N/A	#N/A	#N/A
CNAG_01123	_DRSLEYY[Phospho (STY)]R_	-	DRAP deaminase	8.36849	#N/A	#N/A	#N/A	#N/A	#N/A
CNAG_01123	_AGTS[Phospho (STY)]TPQS[Phospho (STY)]TDTNREYDNIDLNSPIR_	-	DRAP deaminase	#N/A	#N/A	#N/A	#N/A	#N/A	5.96646
CNAG_01123	_AGTSTPQSTDTNREYDNIDLNS[Phospho (STY)]PIR_	-	DRAP deaminase	#N/A	#N/A	#N/A	#N/A	#N/A	10.162
CNAG_01123	_DRSLEY[Phospho (STY)]YR_	-	DRAP deaminase	#N/A	#N/A	#N/A	#N/A	9.62246	12.2337
CNAG_01124	_LLGFDPQSLSNTSNTLINGRDS[Phospho (STY)]PPPLDELLGALAR_	-	hypothetical protein	1.13344	#N/A	#N/A	#N/A	#N/A	#N/A
CNAG_01125	_S[Phospho (STY)]FFGTIK_	-	hypothetical protein	1.85385	#N/A	2.03903	#N/A	#N/A	#N/A
CNAG_01125	_VDPTSS[Phospho (STY)]PIMAV_	-	hypothetical protein	#N/A	#N/A	2.70354	#N/A	#N/A	#N/A
CNAG_01125	_FS[Phospho (STY)]YSAVDKEGVSPMPSQR_	-	hypothetical protein	-2.63178	-2.83776	4.27749	#N/A	#N/A	#N/A
CNAG_01125	_VDPTS[Phospho (STY)]SPIMAV_	-	hypothetical protein	#N/A	#N/A	4.6285	#N/A	#N/A	#N/A
CNAG_01125	_QTS[Phospho (STY)]LMVVASDSSIHRR_	-	hypothetical protein	4.76303	5.64813	4.97134	#N/A	#N/A	#N/A
CNAG_01125	_KINMLSS[Phospho (STY)]AHSSSTSLSSHQAISPNK_	-	hypothetical protein	#N/A	5.93246	5.85747	#N/A	#N/A	#N/A
CNAG_01125	_VDPT[Phospho (STY)]SSPIMAV_	-	hypothetical protein	#N/A	3.79505	#N/A	#N/A	#N/A	#N/A
CNAG_01125	_FSY[Phospho (STY)]SAVDKEGVSPMPSQR_	-	hypothetical protein	#N/A	5.21767	#N/A	#N/A	#N/A	#N/A
CNAG_01125	_FSYS[Phospho (STY)]AVDKEGVSPMPSQR_	-	hypothetical protein	#N/A	5.74806	#N/A	#N/A	#N/A	#N/A
CNAG_01125	_PAPAIT[Phospho (STY)]SSSTTSFPAMR_	-	hypothetical protein	1.45913	#N/A	#N/A	#N/A	#N/A	#N/A
CNAG_01125	_PAPAITSSST[Phospho (STY)]TSFPAMR_	-	hypothetical protein	#N/A	#N/A	#N/A	3.79579	#N/A	#N/A
CNAG_01125	_PAPAITSSSTT[Phospho (STY)]SFPAMR_	-	hypothetical protein	#N/A	#N/A	#N/A	3.22645	#N/A	#N/A
CNAG_01126	_LPQHTVS[Phospho (STY)]IPVPAS[Phospho (STY)]VVDSNGAPSNQQTGQGIDEEGGSFDAM[Oxidation (M)]GKPIPTEQLFVK_	-	guanine nucleotide exchange protein for ADP- robosylation factor	4.37768	4.69455	3.8552	#N/A	#N/A	#N/A
CNAG_01126	_QQAGARPPSAVQEHRS[Phospho (STY)]R_	-	guanine nucleotide exchange protein for ADP- robosylation factor	6.69636	5.32451	#N/A	#N/A	#N/A	#N/A
CNAG_01126	_SSVS[Phospho (STY)]GMASGMNTPDLGEDDVGKFESAK_	-	guanine nucleotide exchange protein for ADP- robosylation factor	-6.85499	#N/A	#N/A	#N/A	6.10424	6.93226
CNAG_01126	_ALDLC[Carbamidomethyl (C)]QS[Phospho (STY)]NEGTNAAYLHPR_	-	guanine nucleotide exchange protein for ADP- robosylation factor	5.85599	#N/A	#N/A	#N/A	#N/A	#N/A
CNAG_01126	_QQAGARPPS[Phospho (STY)]AVQEHRSR_	-	guanine nucleotide exchange protein for ADP- robosylation factor	6.05942	#N/A	#N/A	#N/A	#N/A	#N/A
CNAG_01126	_GGVNASHT[Phospho (STY)]S[Phospho (STY)]LPSIVAPSLPPTPSR_	-	guanine nucleotide exchange protein for ADP- robosylation factor	#N/A	#N/A	#N/A	#N/A	#N/A	1.2347
CNAG_01126	_SEVMQEGTTARS[Phospho (STY)]LPST[Phospho (STY)]PVPER_	-	guanine nucleotide exchange protein for ADP- robosylation factor	#N/A	#N/A	#N/A	5.78062	5.16792	5.4063
CNAG_01130	_AVESVPVQPQAVSPT[Phospho (STY)]EAHIEK_	-	hypothetical protein	#N/A	#N/A	1.78234	#N/A	#N/A	#N/A
CNAG_01130	_AVESVPVQPQAVS[Phospho (STY)]PTEAHIEKDALK_	-	hypothetical protein	#N/A	#N/A	1.8156	#N/A	#N/A	#N/A
CNAG_01130	_AVESVPVQPQAVS[Phospho (STY)]PTEAHIEK_	-	hypothetical protein	#N/A	#N/A	1.81841	#N/A	#N/A	#N/A
CNAG_01130	_AVESVPVQPQAVSPT[Phospho (STY)]EAHIEKDALK_	-	hypothetical protein	#N/A	#N/A	1.95229	#N/A	#N/A	#N/A
CNAG_01130	_QGEDTVPAATTS[Phospho (STY)]PAVTVLPAKPTVTMPTLLR_	-	hypothetical protein	#N/A	2.74266	2.56241	#N/A	#N/A	#N/A
CNAG_01130	_QGEDTVPAATT[Phospho (STY)]SPAVTVLPAKPTVTMPTLLR_	-	hypothetical protein	#N/A	#N/A	2.72816	#N/A	#N/A	#N/A
CNAG_01130	_VSQPIEEDAQSVTM[Oxidation (M)]ES[Phospho (STY)]ES[Phospho (STY)]DSDTVLVSR_	-	hypothetical protein	5.97222	4.93728	5.05335	#N/A	#N/A	-6.45923
CNAG_01130	_KPSFS[Phospho (STY)]GGKPWTGNR_	-	hypothetical protein	5.94159	5.13397	5.96428	#N/A	#N/A	#N/A
CNAG_01130	_KPS[Phospho (STY)]FSGGKPWTGNR_	-	hypothetical protein	7.17781	5.91861	6.36545	#N/A	#N/A	#N/A
CNAG_01130	_VSQPIEEDAQSVT[Phospho (STY)]MESESDSDTVLVSR_	-	hypothetical protein	7.02864	6.88078	6.56954	#N/A	#N/A	#N/A
CNAG_01130	_[Acetyl (Protein N-term)]AVESVPVQPQAVSPT[Phospho (STY)]EAHIEKDALK_	-	hypothetical protein	6.23407	6.1247	7.11691	#N/A	#N/A	#N/A
CNAG_01130	_MAVESVPVQPQAVSPT[Phospho (STY)]EAHIEKDALK_	-	hypothetical protein	2.49019	#N/A	#N/A	#N/A	#N/A	#N/A
CNAG_01130	_MAVESVPVQPQAVS[Phospho (STY)]PTEAHIEKDALK_	-	hypothetical protein	4.21932	#N/A	#N/A	#N/A	#N/A	#N/A
CNAG_01130	_VS[Phospho (STY)]QPIEEDAQSVTM[Oxidation (M)]ESESDSDTVLVSR_	-	hypothetical protein	6.80615	#N/A	#N/A	#N/A	#N/A	-6.79451
CNAG_01132	_RNVEDENAET[Phospho (STY)]IDTVEEGDISVKPK_	-	nucleolar protein 6	#N/A	#N/A	#N/A	#N/A	4.12271	3.30692
CNAG_01134	_FVSQKPFKSTEY[Phospho (STY)]FASEGR_	-	hypothetical protein	#N/A	#N/A	5.37606	#N/A	4.24486	#N/A
CNAG_01137	_RHS[Phospho (STY)]WPQELK_	-	aconitate hydratase, mitochondrial	#N/A	6.37588	5.80268	#N/A	#N/A	#N/A
CNAG_01142	_VSETSSIAT[Phospho (STY)]SSTEAFPK_	-	endoplasmic reticulum protein	#N/A	#N/A	-1.00557	#N/A	5.21096	#N/A
CNAG_01142	_RPGQVTGIGSS[Phospho (STY)]DLIPSK_	-	endoplasmic reticulum protein	#N/A	#N/A	1.13455	#N/A	#N/A	#N/A
CNAG_01142	_RPGQVTGIGS[Phospho (STY)]SDLIPSK_	-	endoplasmic reticulum protein	#N/A	#N/A	1.42967	#N/A	#N/A	#N/A
CNAG_01142	_RPGQVTGIGSSDLIPS[Phospho (STY)]K_	-	endoplasmic reticulum protein	#N/A	#N/A	1.70354	#N/A	#N/A	#N/A
CNAG_01142	_RPGQVT[Phospho (STY)]GIGSSDLIPSK_	-	endoplasmic reticulum protein	#N/A	#N/A	6.91735	#N/A	#N/A	#N/A
CNAG_01142	_PEVASVEVSLSTAS[Phospho (STY)]HPDIPEPVQAR_	-	endoplasmic reticulum protein	#N/A	7.57098	7.29621	#N/A	#N/A	#N/A
CNAG_01142	_TSSLASVGVS[Phospho (STY)]PSK_	-	endoplasmic reticulum protein	8.34941	8.44374	7.93908	#N/A	#N/A	6.34503
CNAG_01142	_AGITEEVDGS[Phospho (STY)]EKDDGR_	-	endoplasmic reticulum protein	9.83915	8.95232	10.0199	#N/A	#N/A	#N/A
CNAG_01143	_GSPS[Phospho (STY)]ENEDEEDIEGWTEDTFVDKPVNGSQPTITMFR_	-	hypothetical protein	4.8453	4.42271	4.66827	#N/A	#N/A	#N/A
CNAG_01143	_GSPSENEDEEDIEGWTEDT[Phospho (STY)]FVDKPVNGSQPTITMFR_	-	hypothetical protein	#N/A	#N/A	4.88176	#N/A	#N/A	#N/A
CNAG_01143	_TTRGDGYSS[Phospho (STY)]PPAGPSNPR_	-	hypothetical protein	6.26182	5.57301	6.25276	#N/A	#N/A	#N/A
CNAG_01143	_TTRGDGY[Phospho (STY)]SSPPAGPSNPR_	-	hypothetical protein	6.16442	5.88389	6.31514	#N/A	#N/A	#N/A
CNAG_01143	_TTRGDGYS[Phospho (STY)]S[Phospho (STY)]PPAGPSNPR_	-	hypothetical protein	6.76153	6.1585	6.56327	#N/A	#N/A	#N/A
CNAG_01143	_TT[Phospho (STY)]RGDGYSSPPAGPSNPR_	-	hypothetical protein	7.42156	#N/A	7.75271	#N/A	#N/A	#N/A
CNAG_01143	_TTRGDGYS[Phospho (STY)]SPPAGPSNPR_	-	hypothetical protein	8.5951	8.31476	8.79127	#N/A	#N/A	#N/A
CNAG_01143	_GS[Phospho (STY)]PS[Phospho (STY)]ENEDEEDIEGWTEDTFVDKPVNGSQPTITMFR_	-	hypothetical protein	#N/A	#N/A	#N/A	#N/A	1.02863	1.06704
CNAG_01145	_EISFNPFSLT[Phospho (STY)]PGRVER_	-	hypothetical protein	#N/A	#N/A	2.37439	#N/A	#N/A	#N/A
CNAG_01145	_STHAGSPT[Phospho (STY)]RPS[Phospho (STY)]PISK_	-	hypothetical protein	5.16789	#N/A	4.96543	#N/A	#N/A	#N/A
CNAG_01145	_STHAGS[Phospho (STY)]PTRPS[Phospho (STY)]PISK_	-	hypothetical protein	5.70722	#N/A	5.05627	#N/A	#N/A	#N/A
CNAG_01145	_STHAGSPTRPS[Phospho (STY)]PIS[Phospho (STY)]K_	-	hypothetical protein	#N/A	#N/A	5.36311	#N/A	#N/A	#N/A
CNAG_01145	_STHAGS[Phospho (STY)]PT[Phospho (STY)]RPSPISK_	-	hypothetical protein	5.36398	#N/A	5.51713	#N/A	#N/A	#N/A
CNAG_01148	_VTHNPISPSLLES[Phospho (STY)]DDEWSDEDEDEDEEIPS[Phospho (STY)]EEDVGEMEVEEVK_	FPR3	FK506-binding protein 4	#N/A	4.97257	4.73792	#N/A	#N/A	#N/A
CNAG_01148	_VTHNPISPSLLES[Phospho (STY)]DDEWS[Phospho (STY)]DEDEDEDEEIPSEEDVGEMEVEEVKQK_	FPR3	FK506-binding protein 4	#N/A	6.34579	6.10947	#N/A	#N/A	#N/A
CNAG_01148	_VEGEKAEEKPAAAAT[Phospho (STY)]EK_	FPR3	FK506-binding protein 4	#N/A	#N/A	#N/A	#N/A	5.63102	#N/A
CNAG_01149	_KHSKADLHPPPATTPAPAAT[Phospho (STY)]PAVAPSSTPHR_	-	hypothetical protein	1.14219	1.45814	1.03229	#N/A	#N/A	#N/A
CNAG_01149	_GGS[Phospho (STY)]DDEDDGS[Phospho (STY)]LEATMAFDKFSQELK_	-	hypothetical protein	#N/A	#N/A	1.54544	#N/A	#N/A	#N/A
CNAG_01149	_VTSPAHIS[Phospho (STY)]PTSPK_	-	hypothetical protein	4.83983	4.85714	4.47752	#N/A	#N/A	#N/A
CNAG_01149	_IQTLLDVKGGS[Phospho (STY)]DDEDDGSLEATMAFDK_	-	hypothetical protein	#N/A	4.79431	4.56644	#N/A	#N/A	#N/A
CNAG_01149	_IQTLLDVKGGS[Phospho (STY)]DDEDDGSLEATM[Oxidation (M)]AFDK_	-	hypothetical protein	#N/A	4.66938	5.30553	#N/A	#N/A	#N/A
CNAG_01149	_IQTLLDVKGGSDDEDDGSLEAT[Phospho (STY)]MAFDK_	-	hypothetical protein	5.29878	5.75225	5.74308	#N/A	#N/A	#N/A
CNAG_01149	_IQTLLDVKGGSDDEDDGS[Phospho (STY)]LEAT[Phospho (STY)]MAFDK_	-	hypothetical protein	5.31473	4.92205	6.04973	#N/A	#N/A	#N/A
CNAG_01149	_VTSPAHISPT[Phospho (STY)]S[Phospho (STY)]PKNHPK_	-	hypothetical protein	#N/A	6.87127	6.13452	#N/A	#N/A	#N/A
CNAG_01149	_S[Phospho (STY)]RS[Phospho (STY)]PGEGT[Phospho (STY)]FEEKS[Phospho (STY)]SEEGMTMPSQSAGYQAR_	-	hypothetical protein	7.02482	6.76846	6.79879	#N/A	#N/A	#N/A
CNAG_01149	_QSASSRPS[Phospho (STY)]S[Phospho (STY)]FGPSNDLMK_	-	hypothetical protein	6.69858	6.94064	6.80754	#N/A	#N/A	#N/A
CNAG_01149	_GPSTQHVLTQNQPPTVDTQVSQQPQAQVPQPPLQS[Phospho (STY)]PR_	-	hypothetical protein	6.67056	6.98301	6.96018	#N/A	#N/A	#N/A
CNAG_01149	_VTS[Phospho (STY)]PAHIS[Phospho (STY)]PTSPK_	-	hypothetical protein	7.38561	7.09376	6.96608	#N/A	#N/A	#N/A
CNAG_01149	_LHY[Phospho (STY)]SSQASDQAQS[Phospho (STY)]PVQPSLPSR_	-	hypothetical protein	7.16506	8.04474	7.37503	#N/A	#N/A	#N/A
CNAG_01149	_VTSPAHISPTS[Phospho (STY)]PK_	-	hypothetical protein	8.52926	8.65429	8.6416	#N/A	#N/A	#N/A
CNAG_01149	_EAMSPTKLHYSSQASDQAQS[Phospho (STY)]PVQPSLPSR_	-	hypothetical protein	#N/A	#N/A	#N/A	#N/A	6.13472	#N/A
CNAG_01150	_VPVEENGNISDS[Phospho (STY)]GIDM[Oxidation (M)]AEPK_	-	omega-6 fatty acid desaturase (delta-12 desaturase)	#N/A	5.43493	6.40175	#N/A	#N/A	#N/A
CNAG_01150	_VPVEENGNIS[Phospho (STY)]DSGIDM[Oxidation (M)]AEPK_	-	omega-6 fatty acid desaturase (delta-12 desaturase)	6.5782	#N/A	6.61128	#N/A	#N/A	#N/A
CNAG_01150	_VPVEENGNIS[Phospho (STY)]DSGIDMAEPK_	-	omega-6 fatty acid desaturase (delta-12 desaturase)	#N/A	1.73673	#N/A	#N/A	#N/A	#N/A
CNAG_01150	_AVT[Phospho (STY)]PPAGQVEK_	-	omega-6 fatty acid desaturase (delta-12 desaturase)	8.15461	8.04707	#N/A	#N/A	#N/A	#N/A
CNAG_01150	_NASGLAQRVPVEENGNISDS[Phospho (STY)]GIDMAEPK_	-	omega-6 fatty acid desaturase (delta-12 desaturase)	6.26762	#N/A	#N/A	#N/A	#N/A	#N/A
CNAG_01152	_LLLSDGHSC[Carbamidomethyl (C)]Y[Phospho (STY)]R_	-	small subunit ribosomal protein S6e, variant	#N/A	-1.43688	#N/A	#N/A	#N/A	1.04758
CNAG_01152	_LLLSDGHS[Phospho (STY)]C[Carbamidomethyl (C)]YR_	-	small subunit ribosomal protein S6e, variant	#N/A	-1.23176	#N/A	#N/A	1.24212	#N/A
CNAG_01153	_SQPSWSKAT[Phospho (STY)]PEEVC[Carbamidomethyl (C)]DQIFK_	-	small subunit ribosomal protein S13e	#N/A	7.57403	7.68522	#N/A	#N/A	#N/A
CNAG_01155	_PSVNQQYSSYMSQY[Phospho (STY)]PQQGVQSLSRR_	GUT1	glycerol kinase	#N/A	#N/A	3.60583	#N/A	#N/A	#N/A
CNAG_01155	_RPS[Phospho (STY)]VNQQYSSYMSQY[Phospho (STY)]PQQGVQSLSRR_	GUT1	glycerol kinase	9.24597	9.42756	9.37854	#N/A	#N/A	#N/A
CNAG_01155	_NPSPLAAGGTGGFT[Phospho (STY)]PVFEAS[Phospho (STY)]PANS[Phospho (STY)]PAGSRRPS[Phospho (STY)]ISQPAAR_	GUT1	glycerol kinase	#N/A	#N/A	#N/A	#N/A	1.22097	#N/A
CNAG_01155	_NPSPLAAGGTGGFT[Phospho (STY)]PVFEASPANS[Phospho (STY)]PAGS[Phospho (STY)]RRPS[Phospho (STY)]IS[Phospho (STY)]QPAAR_	GUT1	glycerol kinase	#N/A	#N/A	#N/A	#N/A	6.75142	#N/A
CNAG_01155	_NPSPLAAGGTGGFTPVFEASPANS[Phospho (STY)]PAGS[Phospho (STY)]RRPS[Phospho (STY)]IS[Phospho (STY)]QPAAR_	GUT1	glycerol kinase	#N/A	#N/A	#N/A	#N/A	1.00035	-5.87649
CNAG_01155	_RPS[Phospho (STY)]ISQPAAR_	GUT1	glycerol kinase	#N/A	#N/A	#N/A	#N/A	#N/A	1.07076
CNAG_01155	_RPSVNQQY[Phospho (STY)]SSYMSQYPQQGVQSLS[Phospho (STY)]R_	GUT1	glycerol kinase	#N/A	#N/A	#N/A	#N/A	1.01437	#N/A
CNAG_01155	_RPSVNQQYSSY[Phospho (STY)]MSQYPQQGVQSLS[Phospho (STY)]R_	GUT1	glycerol kinase	#N/A	#N/A	#N/A	#N/A	1.0397	#N/A
CNAG_01155	_SS[Phospho (STY)]MASGPRPIR_	GUT1	glycerol kinase	#N/A	#N/A	#N/A	#N/A	#N/A	1.03912
CNAG_01155	_SYFEGASGYTPLGGT[Phospho (STY)]R_	GUT1	glycerol kinase	#N/A	#N/A	#N/A	5.52646	5.73737	4.93706
CNAG_01156	_GHDY[Phospho (STY)]LAKK_	CAP2	capsular related protein	#N/A	4.86802	4.71248	#N/A	#N/A	#N/A
CNAG_01156	_TPPRAYT[Phospho (STY)]PPVSPK_	CAP2	capsular related protein	#N/A	#N/A	#N/A	6.30923	#N/A	5.57171
CNAG_01164	_S[Phospho (STY)]QSRAFLSEDGMPQPIEFFVASDASAVIEHTK_	-	glutamine-fructose-6-phosphate transaminase (isomerizing)	#N/A	#N/A	#N/A	#N/A	#N/A	1.51368
CNAG_01164	_WATHGVPS[Phospho (STY)]PGNC[Carbamidomethyl (C)]HPHVSDVQTEFTLVHNGIITNYKELK_	-	glutamine-fructose-6-phosphate transaminase (isomerizing)	#N/A	#N/A	#N/A	2.24112	#N/A	#N/A
CNAG_01165	_MRNMSVDGDT[Phospho (STY)]PVSMNHNIR_	LCB5	D-erythro-sphingosine kinase	-7.25923	#N/A	#N/A	4.74806	3.80628	4.36701
CNAG_01168	_SEAVT[Phospho (STY)]PK_	-	H/ACA ribonucleoprotein complex subunit 4	7.19402	7.56321	7.25085	#N/A	#N/A	#N/A
CNAG_01169	_RS[Phospho (STY)]HSGTPHQPLAK_	-	Aspartyl aminopeptidase	#N/A	3.4687	3.20835	#N/A	#N/A	#N/A
CNAG_01169	_LFTSGFVPIS[Phospho (STY)]ERSPSSSLEPGGK_	-	Aspartyl aminopeptidase	#N/A	#N/A	4.55794	#N/A	#N/A	#N/A
CNAG_01169	_LFTSGFVPISERS[Phospho (STY)]PSSSLEPGGK_	-	Aspartyl aminopeptidase	#N/A	#N/A	5.01535	#N/A	#N/A	#N/A
CNAG_01169	_LFTSGFVPISERSPSS[Phospho (STY)]SLEPGGK_	-	Aspartyl aminopeptidase	#N/A	#N/A	6.09861	#N/A	#N/A	#N/A
CNAG_01169	_RSHS[Phospho (STY)]GTPHQPLAK_	-	Aspartyl aminopeptidase	#N/A	1.57268	#N/A	#N/A	#N/A	#N/A
CNAG_01169	_RSHSGT[Phospho (STY)]PHQPLAK_	-	Aspartyl aminopeptidase	#N/A	#N/A	#N/A	5.28214	2.78489	5.39755
CNAG_01170	_KDQY[Phospho (STY)]VPEVSALAASEESPLEVDAETK_	-	small subunit ribosomal protein S17	#N/A	6.81342	6.25123	#N/A	#N/A	#N/A
CNAG_01170	_KDQYVPEVSALAASEESPLEVDAET[Phospho (STY)]K_	-	small subunit ribosomal protein S17	#N/A	7.21901	6.94885	#N/A	#N/A	#N/A
CNAG_01173	_RPS[Phospho (STY)]FASS[Phospho (STY)]PLRNPSFSPLS[Phospho (STY)]PSASDTDSIIK_	LAG1	LAG1 family transcription factor, putative	4.08736	4.01863	4.00916	#N/A	#N/A	#N/A
CNAG_01173	_INIS[Phospho (STY)]LTGEQAVKDSIISWTDLNGK_	LAG1	LAG1 family transcription factor, putative	#N/A	#N/A	4.7064	#N/A	#N/A	#N/A
CNAG_01173	_PASRPNS[Phospho (STY)]LPNTPQQR_	LAG1	LAG1 family transcription factor, putative	#N/A	7.21035	5.90608	#N/A	#N/A	#N/A
CNAG_01173	_RPSFASSPLRNPSFS[Phospho (STY)]PLS[Phospho (STY)]PSASDTDSIIK_	LAG1	LAG1 family transcription factor, putative	7.1745	6.68167	7.11317	#N/A	#N/A	#N/A
CNAG_01173	_FGILPM[Oxidation (M)]TPHTNNMNLPSTPSSPVSSSSSLDY[Phospho (STY)]FNYQSQR_	LAG1	LAG1 family transcription factor, putative	#N/A	4.69541	#N/A	#N/A	#N/A	#N/A
CNAG_01173	_TLGSDGRPVT[Phospho (STY)]GAKTPQYADEK_	LAG1	LAG1 family transcription factor, putative	#N/A	#N/A	#N/A	#N/A	4.97457	#N/A
CNAG_01174	_PALSNLQHLGGGVKT[Phospho (STY)]PR_	-	hypothetical protein	#N/A	#N/A	1.48345	#N/A	#N/A	#N/A
CNAG_01174	_RVQWTS[Phospho (STY)]DPHIVQLQPIEPAPGSPHTLDSSNIDEFR_	-	hypothetical protein	#N/A	#N/A	2.39584	#N/A	#N/A	#N/A
CNAG_01174	_YDDTPES[Phospho (STY)]PGFK_	-	hypothetical protein	#N/A	#N/A	2.40471	#N/A	#N/A	#N/A
CNAG_01174	_TQSRYDDTPES[Phospho (STY)]PGFK_	-	hypothetical protein	3.42654	#N/A	3.2063	#N/A	#N/A	#N/A
CNAG_01174	_RVQWTSDPHIVQLQPIEPAPGS[Phospho (STY)]PHTLDSSNIDEFRNALER_	-	hypothetical protein	8.01549	7.33558	7.29062	#N/A	#N/A	#N/A
CNAG_01174	_TQSRYDDTPES[Phospho (STY)]PGFKGFFQR_	-	hypothetical protein	#N/A	4.58168	#N/A	#N/A	#N/A	#N/A
CNAG_01174	_SGEHDSAS[Phospho (STY)]QDAFAAR_	-	hypothetical protein	#N/A	5.41042	#N/A	#N/A	#N/A	#N/A
CNAG_01174	_HDTDETTYEANLIDNGMRDHVSQY[Phospho (STY)]IAPGETDGLPNIPQMAR_	-	hypothetical protein	#N/A	5.49844	#N/A	#N/A	#N/A	#N/A
CNAG_01174	_TDVDPPQRPSIERHDT[Phospho (STY)]DETTYEANLIDNGMR_	-	hypothetical protein	#N/A	6.06972	#N/A	#N/A	#N/A	#N/A
CNAG_01174	_TPLGSTPPEKGGADY[Phospho (STY)]FSRPLTEDER_	-	hypothetical protein	5.63449	#N/A	#N/A	#N/A	#N/A	#N/A
CNAG_01174	_LQATHHLYWNVVHDKMSVDQAS[Phospho (STY)]K_	-	hypothetical protein	#N/A	#N/A	#N/A	5.13952	#N/A	#N/A
CNAG_01174	_RGSEDEYS[Phospho (STY)]S[Phospho (STY)]GDER_	-	hypothetical protein	#N/A	#N/A	#N/A	3.78576	2.45142	3.89152
CNAG_01174	_TPLGST[Phospho (STY)]PPEKGGADYFSR_	-	hypothetical protein	#N/A	#N/A	#N/A	7.04813	#N/A	#N/A
CNAG_01178	_IS[Phospho (STY)]DLQGQGGGPVITNPTPDDLR_	-	nuclear envelope-endoplasmic reticulum network protein	#N/A	#N/A	#N/A	#N/A	8.39818	7.8186
CNAG_01179	_PS[Phospho (STY)]PLDNTRR_	-	DNA-directed RNA polymerase I and III subunit RPAC1	6.0802	7.1046	6.48542	#N/A	#N/A	#N/A
CNAG_01180	_SPTSPQPPRS[Phospho (STY)]PSTPPS[Phospho (STY)]PLASPTHSILR_	-	hypothetical protein	-1.33049	#N/A	#N/A	#N/A	3.41193	#N/A
CNAG_01180	_FLQS[Phospho (STY)]DPGTPNFQETADQIR_	-	hypothetical protein	#N/A	#N/A	#N/A	#N/A	3.64869	#N/A
CNAG_01182	_TS[Phospho (STY)]VAAGFGGYSGDR_	-	cytoplasmic protein	#N/A	1.38732	-1.94256	#N/A	#N/A	#N/A
CNAG_01182	_T[Phospho (STY)]SVAAGFGGYSGDR_	-	cytoplasmic protein	#N/A	1.42972	-1.88487	#N/A	#N/A	#N/A
CNAG_01182	_RPSRGGS[Phospho (STY)]ISGPSGVSGER_	-	cytoplasmic protein	#N/A	5.34897	5.92826	#N/A	#N/A	#N/A
CNAG_01182	_RVNGSNS[Phospho (STY)]EVPASTDFA_	-	cytoplasmic protein	6.67542	#N/A	7.01085	#N/A	#N/A	#N/A
CNAG_01182	_RVNGS[Phospho (STY)]NSEVPASTDFA_	-	cytoplasmic protein	7.43246	#N/A	7.59038	#N/A	#N/A	#N/A
CNAG_01182	_RTSVAAGFGGY[Phospho (STY)]SGDR_	-	cytoplasmic protein	#N/A	1.50201	#N/A	#N/A	#N/A	#N/A
CNAG_01182	_T[Phospho (STY)]SVAAGFGGYSGDRR_	-	cytoplasmic protein	#N/A	5.91342	#N/A	#N/A	#N/A	#N/A
CNAG_01182	_ADSSPADNLSPKAVQEQLPS[Phospho (STY)]PDAQGAEHQLSLR_	-	cytoplasmic protein	7.22294	6.37379	#N/A	#N/A	#N/A	#N/A
CNAG_01182	_GGS[Phospho (STY)]ISGPSGVSGER_	-	cytoplasmic protein	#N/A	#N/A	#N/A	#N/A	#N/A	1.0422
CNAG_01183	_DMS[Phospho (STY)]DYHLSPPIVPYGR_	LSB1	hypothetical protein	#N/A	#N/A	1.62663	#N/A	#N/A	#N/A
CNAG_01183	_DMSDYHLS[Phospho (STY)]PPIVPYGR_	LSB1	hypothetical protein	2.08532	1.5894	2.56719	#N/A	#N/A	#N/A
CNAG_01183	_TVT[Phospho (STY)]SPPTPAAR_	LSB1	hypothetical protein	6.59349	6.48451	6.8921	#N/A	#N/A	#N/A
CNAG_01183	_DMSDY[Phospho (STY)]HLSPPIVPYGR_	LSB1	hypothetical protein	#N/A	#N/A	7.05488	#N/A	#N/A	#N/A
CNAG_01183	_TVTS[Phospho (STY)]PPTPAAR_	LSB1	hypothetical protein	7.24689	7.89676	8.26343	#N/A	#N/A	#N/A
CNAG_01183	_SQSQLS[Phospho (STY)]SSVTSYK_	LSB1	hypothetical protein	7.50835	6.78947	8.90436	#N/A	8.51439	#N/A
CNAG_01183	_S[Phospho (STY)]GFSNVTSSK_	LSB1	hypothetical protein	6.16202	#N/A	#N/A	#N/A	#N/A	#N/A
CNAG_01184	_SHLWS[Phospho (STY)]GIGEDKK_	-	hypothetical protein	#N/A	#N/A	6.18598	#N/A	#N/A	#N/A
CNAG_01185	_FNPNSTQSGTSTLHASDLGPPDISPASTPGPAT[Phospho (STY)]PR_	-	Hsp70-like protein	1.84179	#N/A	#N/A	#N/A	#N/A	#N/A
CNAG_01185	_FNPNSTQSGTSTLHAS[Phospho (STY)]DLGPPDISPAS[Phospho (STY)]T[Phospho (STY)]PGPATPR_	-	Hsp70-like protein	#N/A	#N/A	#N/A	4.99433	4.66142	#N/A
CNAG_01185	_FNPNSTQSGTSTLHASDLGPPDIS[Phospho (STY)]PAS[Phospho (STY)]T[Phospho (STY)]PGPAT[Phospho (STY)]PR_	-	Hsp70-like protein	#N/A	#N/A	#N/A	4.29743	#N/A	#N/A
CNAG_01185	_FNPNSTQSGTSTLHASDLGPPDIS[Phospho (STY)]PAST[Phospho (STY)]PGPAT[Phospho (STY)]PR_	-	Hsp70-like protein	#N/A	#N/A	#N/A	#N/A	#N/A	3.04008
CNAG_01189	_QHEY[Phospho (STY)]EADSDVDS[Phospho (STY)]GVADLEDFVEKELEEDDEEDVEDDAAEKAK_	-	DNA-directed RNA polymerase I subunit RPA1	#N/A	1.10481	1.1507	#N/A	#N/A	#N/A
CNAG_01189	_QHEY[Phospho (STY)]EADSDVDSGVADLEDFVEK_	-	DNA-directed RNA polymerase I subunit RPA1	5.64307	#N/A	5.77818	#N/A	#N/A	#N/A
CNAG_01191	_DFLGTPETMNSLFLGLNQPTPTY[Phospho (STY)]SR_	-	long-chain fatty acid transporter, variant 2	#N/A	#N/A	4.38189	#N/A	#N/A	#N/A
CNAG_01191	_DFLGT[Phospho (STY)]PETMNSLFLGLNQPTPTYSR_	-	long-chain fatty acid transporter, variant 2	#N/A	5.59209	6.18257	#N/A	#N/A	#N/A
CNAG_01191	_DFLGTPETMNSLFLGLNQPT[Phospho (STY)]PTYSR_	-	long-chain fatty acid transporter, variant 2	#N/A	5.81237	#N/A	#N/A	#N/A	#N/A
CNAG_01195	_QGSSQVDILQSPGSAVFAFDAAEDESTTEHGAY[Phospho (STY)]RR_	-	cation-transporting ATPase 13A3/4/5	#N/A	#N/A	3.36242	#N/A	#N/A	#N/A
CNAG_01195	_[Acetyl (Protein N-term)]TSPPT[Phospho (STY)]PPPIQDNIPSAISVSR_	-	cation-transporting ATPase 13A3/4/5	#N/A	5.71781	6.19152	#N/A	#N/A	#N/A
CNAG_01195	_FSDDEEDFEPQPLS[Phospho (STY)]PQRPSATALGR_	-	cation-transporting ATPase 13A3/4/5	#N/A	#N/A	6.27669	7.50348	7.05077	6.74009
CNAG_01195	_[Acetyl (Protein N-term)]TS[Phospho (STY)]PPTPPPIQDNIPSAISVSR_	-	cation-transporting ATPase 13A3/4/5	#N/A	5.22253	6.41954	#N/A	#N/A	#N/A
CNAG_01195	_IAS[Phospho (STY)]FIGLTR_	-	cation-transporting ATPase 13A3/4/5	#N/A	#N/A	#N/A	#N/A	#N/A	1.64108
CNAG_01195	_RDS[Phospho (STY)]SAQPGSYFSYR_	-	cation-transporting ATPase 13A3/4/5	#N/A	#N/A	#N/A	#N/A	1.20527	1.10551
CNAG_01195	_RDSS[Phospho (STY)]AQPGSYFSYR_	-	cation-transporting ATPase 13A3/4/5	#N/A	#N/A	#N/A	#N/A	1.04955	#N/A
CNAG_01197	_HLDS[Phospho (STY)]WPNLK_	-	ran GTPase-activating protein 1	#N/A	5.44523	5.38098	#N/A	5.52993	4.24016
CNAG_01199	_ISTSQSSLDASTSSLTNRPGTPSASAADAAS[Phospho (STY)]QMPDDPVSQLSAILGAHLR_	-	nuclear pore complex protein Nup62	#N/A	#N/A	1.47594	#N/A	#N/A	#N/A
CNAG_01199	_PAAGGFSFGNLGSKPAT[Phospho (STY)]PSTTEAPK_	-	nuclear pore complex protein Nup62	5.47863	4.4431	5.8401	#N/A	#N/A	#N/A
CNAG_01199	_PAEAPKPAAGGFSFGNLGSKPAT[Phospho (STY)]PSTTEAPK_	-	nuclear pore complex protein Nup62	6.0864	6.5131	6.60296	#N/A	#N/A	#N/A
CNAG_01199	_PAAGGFSFGNLGS[Phospho (STY)]KPATPSTTEAPK_	-	nuclear pore complex protein Nup62	7.49566	6.42141	7.82116	#N/A	#N/A	#N/A
CNAG_01199	_PAEAPKPAAGGFSFGNLGSKPATPS[Phospho (STY)]TTEAPK_	-	nuclear pore complex protein Nup62	#N/A	8.38083	8.547	#N/A	#N/A	#N/A
CNAG_01199	_DASSST[Phospho (STY)]PAS[Phospho (STY)]GTPPTTSGGGLFGGGGLFGAKPAPPATEAPK_	-	nuclear pore complex protein Nup62	#N/A	#N/A	#N/A	5.60742	#N/A	#N/A
CNAG_01203	_FSSLAMT[Phospho (STY)]PKDEKEETK_	YVH1	dual specificity phosphatase 12	#N/A	#N/A	1.11015	#N/A	#N/A	#N/A
CNAG_01203	_EHMMDHILDQAPPVPASRPRTPSGASIS[Phospho (STY)]S[Phospho (STY)]QR_	YVH1	dual specificity phosphatase 12	#N/A	#N/A	1.39241	#N/A	#N/A	#N/A
CNAG_01203	_YPASPS[Phospho (STY)]PSNPPTPK_	YVH1	dual specificity phosphatase 12	#N/A	#N/A	2.07522	-5.54551	#N/A	#N/A
CNAG_01203	_RFS[Phospho (STY)]SLAMTPK_	YVH1	dual specificity phosphatase 12	#N/A	4.33247	3.98301	#N/A	#N/A	#N/A
CNAG_01203	_DTVTSPLS[Phospho (STY)]ISHNHHNNNNNNNTTHPASR_	YVH1	dual specificity phosphatase 12	#N/A	#N/A	5.56005	#N/A	#N/A	#N/A
CNAG_01203	_RFSS[Phospho (STY)]LAMTPK_	YVH1	dual specificity phosphatase 12	#N/A	5.2902	#N/A	#N/A	#N/A	#N/A
CNAG_01207	_GY[Phospho (STY)]ENINPDTPTDIMSLGMEK_	-	hypothetical protein	#N/A	#N/A	3.16093	#N/A	#N/A	#N/A
CNAG_01207	_MQQPVT[Phospho (STY)]FK_	-	hypothetical protein	#N/A	#N/A	3.62225	#N/A	#N/A	#N/A
CNAG_01207	_GYENINPDT[Phospho (STY)]PTDIMSLGMEK_	-	hypothetical protein	#N/A	#N/A	4.21795	#N/A	#N/A	#N/A
CNAG_01207	_TISMLET[Phospho (STY)]RISDFGPAQQER_	-	hypothetical protein	4.39219	#N/A	4.68955	#N/A	#N/A	#N/A
CNAG_01207	_HASSNLSLLGQDIS[Phospho (STY)]PQIRPSSSFSLVR_	-	hypothetical protein	5.56376	4.96043	5.17498	#N/A	#N/A	#N/A
CNAG_01207	_KIVSPIASS[Phospho (STY)]PPNSASLSVDR_	-	hypothetical protein	5.73294	#N/A	5.82535	#N/A	#N/A	#N/A
CNAG_01207	_KIVSPIAS[Phospho (STY)]SPPNSASLSVDR_	-	hypothetical protein	5.86573	5.03062	6.01388	-6.91089	#N/A	#N/A
CNAG_01207	_KIVS[Phospho (STY)]PIASSPPNSASLSVDR_	-	hypothetical protein	7.26603	6.79318	7.32818	#N/A	#N/A	#N/A
CNAG_01207	_TISMLETRIS[Phospho (STY)]DFGPAQQER_	-	hypothetical protein	#N/A	#N/A	8.11961	#N/A	#N/A	-3.11854
CNAG_01208	_RIT[Phospho (STY)]PTEIIPPTSFSPSAR_	CCH1	calcium-channel protein CCH1	#N/A	#N/A	6.54184	#N/A	#N/A	#N/A
CNAG_01208	_RITPT[Phospho (STY)]EIIPPTSFSPSAR_	CCH1	calcium-channel protein CCH1	7.11024	#N/A	6.96053	#N/A	#N/A	#N/A
CNAG_01208	_TYPLPASDLSNSSDGNSLPS[Phospho (STY)]PSLYNSPTR_	CCH1	calcium-channel protein CCH1	#N/A	#N/A	#N/A	6.9381	6.81789	6.94659
CNAG_01209	_AFLNTAMS[Phospho (STY)]PEMPYAK_	FAB1	1-phosphatidylinositol-3-phosphate 5-kinase	#N/A	4.92571	#N/A	#N/A	#N/A	#N/A
CNAG_01209	_QTTIIGLSSDTNT[Phospho (STY)]DGAEDIATTK_	FAB1	1-phosphatidylinositol-3-phosphate 5-kinase	#N/A	#N/A	#N/A	#N/A	7.13422	#N/A
CNAG_01209	_SINSFSTSVHRY[Phospho (STY)]PTISDR_	FAB1	1-phosphatidylinositol-3-phosphate 5-kinase	#N/A	#N/A	#N/A	#N/A	#N/A	6.22255
CNAG_01211	_AGQSS[Phospho (STY)]SDVLAVGASVGAEGFAEK_	-	hypothetical protein	#N/A	#N/A	#N/A	5.24453	5.60831	#N/A
CNAG_01212	_SFT[Phospho (STY)]PTPPLS[Phospho (STY)]R_	-	hypothetical protein	#N/A	#N/A	1.81329	#N/A	#N/A	#N/A
CNAG_01212	_SHS[Phospho (STY)]ANGS[Phospho (STY)]PTPATPGRLPGESDLSLLLR_	-	hypothetical protein	#N/A	#N/A	1.85124	#N/A	1.00646	#N/A
CNAG_01212	_SHS[Phospho (STY)]ANGSPTPATPGRLPGESDLSLLLR_	-	hypothetical protein	#N/A	#N/A	2.35337	#N/A	#N/A	#N/A
CNAG_01212	_PNGISINS[Phospho (STY)]PPTISNLLLSLPSR_	-	hypothetical protein	#N/A	1.33933	2.5829	#N/A	#N/A	#N/A
CNAG_01212	_PNGISINSPPTISNLLLSLPSRSPS[Phospho (STY)]FSEVELIR_	-	hypothetical protein	#N/A	#N/A	2.99705	#N/A	#N/A	#N/A
CNAG_01212	_PNGISINSPPT[Phospho (STY)]ISNLLLSLPSR_	-	hypothetical protein	#N/A	#N/A	4.75363	#N/A	#N/A	#N/A
CNAG_01212	_PNGIS[Phospho (STY)]INSPPTISNLLLSLPSR_	-	hypothetical protein	#N/A	#N/A	5.0465	#N/A	#N/A	#N/A
CNAG_01212	_LQHLY[Phospho (STY)]ETAHTRVNGMYFPC[Carbamidomethyl (C)]HPEVC[Carbamidomethyl (C)]GPLTEEEK_	-	hypothetical protein	#N/A	#N/A	5.68398	2.98426	#N/A	2.37385
CNAG_01212	_SHSANGSPTPAT[Phospho (STY)]PGRLPGESDLSLLLR_	-	hypothetical protein	5.78025	6.03989	6.25842	#N/A	#N/A	#N/A
CNAG_01212	_SFTPT[Phospho (STY)]PPLSR_	-	hypothetical protein	6.84964	6.43361	6.71747	#N/A	#N/A	#N/A
CNAG_01212	_SFTPTPPLS[Phospho (STY)]R_	-	hypothetical protein	9.09193	6.78825	9.42769	#N/A	#N/A	#N/A
CNAG_01212	_SHSANGS[Phospho (STY)]PTPATPGR_	-	hypothetical protein	3.23714	2.00604	#N/A	#N/A	#N/A	#N/A
CNAG_01212	_PNGISINSPPTISNLLLS[Phospho (STY)]LPSRSPSFSEVELIR_	-	hypothetical protein	#N/A	#N/A	#N/A	#N/A	5.28815	4.96899
CNAG_01212	_SFT[Phospho (STY)]PTPPLSR_	-	hypothetical protein	#N/A	#N/A	#N/A	#N/A	1.35683	#N/A
CNAG_01212	_SHS[Phospho (STY)]ANGSPTPATPGR_	-	hypothetical protein	#N/A	#N/A	#N/A	#N/A	4.05125	2.86954
CNAG_01222	_RLS[Phospho (STY)]SGLLR_	-	hypothetical protein	#N/A	4.22926	#N/A	-1.24315	#N/A	#N/A
CNAG_01229	_PEMVGPAGPWVGNNVPPY[Phospho (STY)]VK_	-	L-mandelate dehydrogenase	#N/A	2.59814	#N/A	#N/A	#N/A	#N/A
CNAG_01234	_S[Phospho (STY)]TEETFFTAR_	-	spore wall assembly-associated protein	3.83691	#N/A	3.24409	#N/A	#N/A	#N/A
CNAG_01236	_VTNMS[Phospho (STY)]WPEHLVVDSK_	-	rRNA-processing protein EBP2	#N/A	#N/A	4.87483	#N/A	#N/A	#N/A
CNAG_01241	_LGPTEVVQLPAS[Phospho (STY)]DS[Phospho (STY)]EPDDDDRDNQEIDAGR_	SDS22	enzyme regulator	#N/A	1.51226	1.80445	#N/A	#N/A	#N/A
CNAG_01241	_LKT[Phospho (STY)]PLLVPLNFPR_	SDS22	enzyme regulator	#N/A	#N/A	#N/A	#N/A	2.86182	#N/A
CNAG_01242	_TPPT[Phospho (STY)]PPVK_	HAPX	CCAAT-binding transcription factor HapX	#N/A	#N/A	5.4909	#N/A	#N/A	#N/A
CNAG_01242	_VEMSPMPASPAPTASAPT[Phospho (STY)]PIPIAAHSASPR_	HAPX	CCAAT-binding transcription factor HapX	5.6463	5.86963	5.63633	#N/A	#N/A	#N/A
CNAG_01242	_VEMSPMPASPAPTAS[Phospho (STY)]APTPIPIAAHSASPR_	HAPX	CCAAT-binding transcription factor HapX	5.97342	6.13008	5.77969	#N/A	#N/A	#N/A
CNAG_01242	_LLDEAT[Phospho (STY)]PAPSPEPDRESK_	HAPX	CCAAT-binding transcription factor HapX	#N/A	6.34242	6.68963	#N/A	#N/A	#N/A
CNAG_01243	_SSYSSY[Phospho (STY)]SSYSSYSEESEEERPR_	SET101	histone-lysine N-methyltransferase, H3 lysine-4 specific	#N/A	#N/A	#N/A	#N/A	9.88684	8.17468
CNAG_01246	_GVNLEY[Phospho (STY)]PQSASISHGKR_	-	hypothetical protein, variant 2	#N/A	#N/A	4.20023	#N/A	#N/A	#N/A
CNAG_01246	_GVNLEYPQS[Phospho (STY)]ASISHGKR_	-	hypothetical protein, variant 2	#N/A	-7.93823	#N/A	#N/A	5.22558	#N/A
CNAG_01246	_GVNLEYPQS[Phospho (STY)]ASISHGK_	-	hypothetical protein, variant 2	#N/A	#N/A	#N/A	#N/A	4.92238	#N/A
CNAG_01248	_VQSEYASTTAPPAQPLTLTSSLLS[Phospho (STY)]PK_	-	vacuole morphology and inheritance protein 14	1.93713	1.55817	1.52129	#N/A	#N/A	#N/A
CNAG_01248	_VQSEYASTTAPPAQPLTLTS[Phospho (STY)]SLLSPK_	-	vacuole morphology and inheritance protein 14	2.02793	1.62349	1.61133	#N/A	#N/A	#N/A
CNAG_01248	_SLTEAPY[Phospho (STY)]TAPLVGTNSSLAGSPPLSLTLTSASTK_	-	vacuole morphology and inheritance protein 14	#N/A	3.67965	4.27518	#N/A	#N/A	#N/A
CNAG_01248	_SLTEAPYTAPLVGTNSS[Phospho (STY)]LAGSPPLSLTLTSASTK_	-	vacuole morphology and inheritance protein 14	#N/A	4.29907	4.56024	#N/A	#N/A	#N/A
CNAG_01248	_SGTS[Phospho (STY)]PLSPK_	-	vacuole morphology and inheritance protein 14	4.1335	3.41254	#N/A	#N/A	#N/A	#N/A
CNAG_01249	_S[Phospho (STY)]LTPHHWPQFSPR_	-	hypothetical protein	#N/A	5.92685	#N/A	#N/A	#N/A	#N/A
CNAG_01249	_GITFQQY[Phospho (STY)]QQILSHAQK_	-	hypothetical protein	#N/A	#N/A	#N/A	#N/A	#N/A	6.80446
CNAG_01249	_VPPTVDLVLS[Phospho (STY)]GFAIEANTYSPPRDMASTTTEPTTAPITLPLANKPDIK_	-	hypothetical protein	#N/A	#N/A	#N/A	#N/A	#N/A	1.15194
CNAG_01249	_VPPTVDLVLSGFAIEANT[Phospho (STY)]YSPPR_	-	hypothetical protein	#N/A	#N/A	#N/A	#N/A	#N/A	1.01655
CNAG_01249	_VPPTVDLVLSGFAIEANTYS[Phospho (STY)]PPR_	-	hypothetical protein	#N/A	#N/A	#N/A	#N/A	#N/A	1.15048
CNAG_01250	_PPT[Phospho (STY)]PPPPQPSTYASK_	TRL1	tRNA ligase	#N/A	#N/A	1.09624	#N/A	#N/A	#N/A
CNAG_01251	_LNPPGEPESAADDTPATAAGVTSPSSSAPLSPT[Phospho (STY)]ALTTTER_	UFD4	E3 ubiquitin-protein ligase TRIP12	6.44387	6.17685	5.79684	#N/A	#N/A	#N/A
CNAG_01251	_LES[Phospho (STY)]FDVETAFGGGSDPSRPSTASVHR_	UFD4	E3 ubiquitin-protein ligase TRIP12	#N/A	7.0814	6.98789	#N/A	#N/A	5.93335
CNAG_01251	_LHESLGRLES[Phospho (STY)]FDVETAFGGGSDPSRPSTASVHR_	UFD4	E3 ubiquitin-protein ligase TRIP12	#N/A	6.52264	#N/A	#N/A	#N/A	#N/A
CNAG_01251	_VAEASSSTNTAGPSTPVAINKDSSDRSPS[Phospho (STY)]DLISALQANR_	UFD4	E3 ubiquitin-protein ligase TRIP12	7.4477	7.60233	#N/A	#N/A	#N/A	#N/A
CNAG_01251	_LESFDVET[Phospho (STY)]AFGGGSDPSRPSTASVHR_	UFD4	E3 ubiquitin-protein ligase TRIP12	#N/A	#N/A	#N/A	#N/A	6.80267	#N/A
CNAG_01252	_QT[Phospho (STY)]ILPLDATWHMPNSPR_	-	thiosulfate/3-mercaptopyruvate sulfurtransferase	#N/A	#N/A	#N/A	#N/A	5.43843	#N/A
CNAG_01258	_HQHSDPIQHVTIRPGMVS[Phospho (STY)]TMSAATLPSR_	-	hypothetical protein	#N/A	#N/A	1.64819	#N/A	#N/A	#N/A
CNAG_01258	_HQHSDPIQHVT[Phospho (STY)]IRPGMVSTMSAATLPSR_	-	hypothetical protein	#N/A	#N/A	1.93258	#N/A	#N/A	#N/A
CNAG_01258	_HQHS[Phospho (STY)]DPIQHVTIRPGMVSTMSAATLPSR_	-	hypothetical protein	#N/A	#N/A	2.09776	#N/A	#N/A	#N/A
CNAG_01258	_HIHPPLS[Phospho (STY)]PS[Phospho (STY)]HSFTHRPWK_	-	hypothetical protein	#N/A	#N/A	5.14576	#N/A	#N/A	#N/A
CNAG_01258	_DGSTAMGDSSAHSSY[Phospho (STY)]AGSTVPSEHPGSPLSSNR_	-	hypothetical protein	6.14319	5.87506	5.87851	#N/A	#N/A	#N/A
CNAG_01258	_HQHS[Phospho (STY)]DPIQHVTIRPGMVSTMSAATLPSRR_	-	hypothetical protein	#N/A	5.84155	#N/A	#N/A	-1.51139	#N/A
CNAG_01258	_HIHPPLSPS[Phospho (STY)]HSFTHRPWKR_	-	hypothetical protein	2.70473	#N/A	#N/A	#N/A	#N/A	#N/A
CNAG_01261	_PAVAPPGSAAVPFSPVDPSGMSRS[Phospho (STY)]PT[Phospho (STY)]EREEGDDTFGTDAPAPAPAPPLQQR_	-	myosin I binding protein	#N/A	#N/A	1.41634	#N/A	#N/A	#N/A
CNAG_01261	_THSVDTATADPDSVPNRSENLS[Phospho (STY)]PVEK_	-	myosin I binding protein	#N/A	#N/A	3.51983	#N/A	#N/A	#N/A
CNAG_01261	_AQASRS[Phospho (STY)]PSPPLGATHPR_	-	myosin I binding protein	#N/A	#N/A	4.60469	#N/A	#N/A	#N/A
CNAG_01261	_THSVDTATADPDSVPNRS[Phospho (STY)]ENLSPVEK_	-	myosin I binding protein	#N/A	#N/A	4.67607	#N/A	#N/A	#N/A
CNAG_01261	_DEDLEEGTSEKLDQEGSEMGS[Phospho (STY)]EGGDVGGEEVPR_	-	myosin I binding protein	#N/A	6.69487	6.33727	#N/A	#N/A	-4.75445
CNAG_01261	_SENLSPVEKEPPPAAAVVS[Phospho (STY)]AEPEQPER_	-	myosin I binding protein	#N/A	6.7434	6.34815	#N/A	#N/A	#N/A
CNAG_01261	_DEDLEEGTSEKLDQEGS[Phospho (STY)]EMGSEGGDVGGEEVPR_	-	myosin I binding protein	#N/A	7.41579	6.97626	#N/A	#N/A	-6.19932
CNAG_01261	_AQAS[Phospho (STY)]RSPS[Phospho (STY)]PPLGATHPR_	-	myosin I binding protein	7.81586	7.04786	7.97912	#N/A	#N/A	#N/A
CNAG_01261	_AS[Phospho (STY)]ALEER_	-	myosin I binding protein	#N/A	7.37032	#N/A	#N/A	#N/A	#N/A
CNAG_01261	_AQASRSPS[Phospho (STY)]PPLGAT[Phospho (STY)]HPR_	-	myosin I binding protein	7.41246	7.98457	#N/A	#N/A	#N/A	#N/A
CNAG_01263	_ILIERPQSNIHS[Phospho (STY)]NASMEGSALPSPAAK_	-	vacuolar transporter chaperone 4	#N/A	#N/A	1.00936	#N/A	#N/A	#N/A
CNAG_01263	_ILIERPQSNIHSNASMEGSALPS[Phospho (STY)]PAAK_	-	vacuolar transporter chaperone 4	1.19335	#N/A	1.13133	#N/A	#N/A	#N/A
CNAG_01263	_ILIERPQS[Phospho (STY)]NIHSNASMEGSALPSPAAK_	-	vacuolar transporter chaperone 4	#N/A	5.50439	#N/A	#N/A	#N/A	#N/A
CNAG_01263	_RVGITTYGENEAESSS[Phospho (STY)]AGAVNGSSSRPAR_	-	vacuolar transporter chaperone 4	#N/A	#N/A	#N/A	#N/A	3.74026	#N/A
CNAG_01263	_T[Phospho (STY)]EGAEAIR_	-	vacuolar transporter chaperone 4	#N/A	#N/A	#N/A	#N/A	#N/A	1.72829
CNAG_01263	_VGITTYGENEAES[Phospho (STY)]SSAGAVNGSSSRPAR_	-	vacuolar transporter chaperone 4	#N/A	#N/A	#N/A	6.18733	#N/A	5.14701
CNAG_01263	_VGITTYGENEAESSSAGAVNGSS[Phospho (STY)]SRPAR_	-	vacuolar transporter chaperone 4	#N/A	#N/A	#N/A	4.8282	#N/A	#N/A
CNAG_01271	_LPDASVGPTQVQENEEASQKS[Phospho (STY)]EEALKGTGNSK_	-	pre-mRNA-splicing factor isy1	#N/A	4.93852	4.66971	#N/A	#N/A	#N/A
CNAG_01274	_SSALDVAGPSTATVIAPAS[Phospho (STY)]PIPSAK_	-	coatomer subunit gamma	#N/A	#N/A	1.09711	#N/A	#N/A	#N/A
CNAG_01277	_GHYT[Phospho (STY)]PPKPAVTATPPKNR_	-	hypothetical protein	#N/A	#N/A	#N/A	#N/A	#N/A	4.90036
CNAG_01278	_SFS[Phospho (STY)]AGISTSSLPSMMSR_	APT2	Aminophospholipid translocase, putative	5.41016	5.66783	3.673	#N/A	#N/A	#N/A
CNAG_01278	_RTS[Phospho (STY)]MDIQR_	APT2	Aminophospholipid translocase, putative	#N/A	#N/A	4.57153	#N/A	#N/A	#N/A
CNAG_01278	_S[Phospho (STY)]FSAGISTSSLPSMMSR_	APT2	Aminophospholipid translocase, putative	#N/A	4.16547	4.78245	#N/A	#N/A	#N/A
CNAG_01278	_IESQSRSPFNDDSFY[Phospho (STY)]AR_	APT2	Aminophospholipid translocase, putative	#N/A	#N/A	4.79139	#N/A	#N/A	#N/A
CNAG_01278	_SFSAGIS[Phospho (STY)]TSSLPSMMSR_	APT2	Aminophospholipid translocase, putative	#N/A	5.12004	5.38192	#N/A	#N/A	#N/A
CNAG_01278	_GSS[Phospho (STY)]PLSNVDGLGR_	APT2	Aminophospholipid translocase, putative	7.77371	7.70734	7.81086	#N/A	#N/A	#N/A
CNAG_01278	_IESQSRS[Phospho (STY)]PFNDDSFYAR_	APT2	Aminophospholipid translocase, putative	#N/A	4.25292	#N/A	#N/A	#N/A	#N/A
CNAG_01278	_SLSAVQQT[Phospho (STY)]K_	APT2	Aminophospholipid translocase, putative	#N/A	6.90978	#N/A	#N/A	#N/A	#N/A
CNAG_01278	_VRASPLAS[Phospho (STY)]TNYC[Carbamidomethyl (C)]TSDVSSIR_	APT2	Aminophospholipid translocase, putative	4.69145	#N/A	#N/A	#N/A	#N/A	#N/A
CNAG_01282	_DIDLPSPSAS[Phospho (STY)]VPAEPSASAGK_	-	hypothetical protein	#N/A	1.0568	1.0924	#N/A	#N/A	#N/A
CNAG_01282	_QDAISANLPPVS[Phospho (STY)]SSPPFPHSSNNK_	-	hypothetical protein	#N/A	#N/A	1.46464	#N/A	#N/A	#N/A
CNAG_01282	_SKSVPVS[Phospho (STY)]LNQAAYTGATTTQLAENALSGLR_	-	hypothetical protein	#N/A	1.28641	1.58417	#N/A	#N/A	#N/A
CNAG_01282	_SKS[Phospho (STY)]VPVSLNQAAYTGATTTQLAENALSGLR_	-	hypothetical protein	#N/A	#N/A	1.67744	#N/A	#N/A	#N/A
CNAG_01282	_DIDLPSPSASVPAEPS[Phospho (STY)]ASAGK_	-	hypothetical protein	#N/A	6.26005	6.00176	#N/A	#N/A	#N/A
CNAG_01282	_SFQFGRSS[Phospho (STY)]LDLPDSVGISSSLPTTPSGQGVK_	-	hypothetical protein	6.32033	6.62438	6.61572	#N/A	#N/A	#N/A
CNAG_01282	_S[Phospho (STY)]FQFGRSSLDLPDSVGISSSLPTTPSGQGVK_	-	hypothetical protein	6.53481	6.87795	6.87517	#N/A	#N/A	#N/A
CNAG_01282	_SFQFGRS[Phospho (STY)]SLDLPDSVGISSSLPTTPSGQGVK_	-	hypothetical protein	7.11731	7.28012	7.27147	#N/A	#N/A	#N/A
CNAG_01282	_SSLDLPDSVGISS[Phospho (STY)]SLPTTPSGQGVK_	-	hypothetical protein	1.39223	1.38727	#N/A	#N/A	#N/A	#N/A
CNAG_01282	_SPAVSFLEIPDATDGPTEIHT[Phospho (STY)]PSTTMK_	-	hypothetical protein	#N/A	7.77599	#N/A	#N/A	#N/A	#N/A
CNAG_01282	_QDAISANLPPVSS[Phospho (STY)]SPPFPHSSNNK_	-	hypothetical protein	#N/A	#N/A	#N/A	#N/A	1.05907	#N/A
CNAG_01282	_TTAGTEIGS[Phospho (STY)]ELGESK_	-	hypothetical protein	#N/A	#N/A	#N/A	#N/A	4.70824	#N/A
CNAG_01282	_TTAGTEIGSELGES[Phospho (STY)]K_	-	hypothetical protein	#N/A	#N/A	#N/A	6.33595	5.76715	#N/A
CNAG_01285	_SGALS[Phospho (STY)]PTSK_	IPL1	AUR protein kinase	#N/A	#N/A	1.45721	#N/A	#N/A	#N/A
CNAG_01285	_SGALS[Phospho (STY)]PTSKFK_	IPL1	AUR protein kinase	#N/A	#N/A	#N/A	#N/A	#N/A	6.2157
CNAG_01292	_T[Phospho (STY)]RKPSPEEDDLLSDSELVHILQGWVTC[Carbamidomethyl (C)]R_	-	pol II transcription elongation factor	4.99525	5.76019	#N/A	#N/A	#N/A	#N/A
CNAG_01292	_KPS[Phospho (STY)]PEEDDLLSDSELVHILQGWVTC[Carbamidomethyl (C)]R_	-	pol II transcription elongation factor	#N/A	#N/A	#N/A	#N/A	3.97039	4.34455
CNAG_01292	_SHQLAPLPASQT[Phospho (STY)]PEKEIDS[Phospho (STY)]PQLEK_	-	pol II transcription elongation factor	#N/A	#N/A	#N/A	6.96966	#N/A	7.08347
CNAG_01293	_QPSPNNY[Phospho (STY)]TGNILISLLSDPFR_	-	hypothetical protein	#N/A	#N/A	#N/A	#N/A	#N/A	3.98408
CNAG_01293	_VPSLS[Phospho (STY)]FFSPSNTSK_	-	hypothetical protein	#N/A	#N/A	#N/A	#N/A	#N/A	1.1736
CNAG_01296	_QDAGLSSSLEGMS[Phospho (STY)]ISPGR_	-	RNA polymerase I-specific transcription initiation factor RRN3	#N/A	#N/A	2.40404	#N/A	#N/A	#N/A
CNAG_01296	_LKVGS[Phospho (STY)]YGDR_	-	RNA polymerase I-specific transcription initiation factor RRN3	6.18182	5.56974	5.81956	#N/A	#N/A	#N/A
CNAG_01298	_EAAFNSRPDDEASSISMS[Phospho (STY)]FHDSQGGASGGDRK_	-	lysophospholipase NTE1	#N/A	4.93941	5.65978	#N/A	#N/A	#N/A
CNAG_01298	_APS[Phospho (STY)]LPAMTPKPLS[Phospho (STY)]PITHK_	-	lysophospholipase NTE1	#N/A	#N/A	6.64408	#N/A	#N/A	#N/A
CNAG_01298	_EAAFNSRPDDEASSIS[Phospho (STY)]MSFHDSQGGASGGDRK_	-	lysophospholipase NTE1	6.40049	5.95915	6.96723	#N/A	#N/A	#N/A
CNAG_01298	_APSLPAM[Oxidation (M)]TPKPLSPIT[Phospho (STY)]HK_	-	lysophospholipase NTE1	6.87913	7.2451	7.03426	#N/A	#N/A	#N/A
CNAG_01298	_APSLPAM[Oxidation (M)]TPKPLS[Phospho (STY)]PITHK_	-	lysophospholipase NTE1	7.14811	6.4189	7.04975	#N/A	#N/A	#N/A
CNAG_01298	_APSLPAM[Oxidation (M)]T[Phospho (STY)]PKPLSPITHK_	-	lysophospholipase NTE1	7.54527	7.72047	7.39124	#N/A	#N/A	#N/A
CNAG_01298	_APS[Phospho (STY)]LPAM[Oxidation (M)]TPKPLSPITHK_	-	lysophospholipase NTE1	#N/A	5.692	#N/A	#N/A	#N/A	#N/A
CNAG_01298	_EAAFNS[Phospho (STY)]RPDDEASS[Phospho (STY)]IS[Phospho (STY)]MSFHDSQGGASGGDRK_	-	lysophospholipase NTE1	#N/A	#N/A	#N/A	5.64189	#N/A	5.4534
CNAG_01298	_RY[Phospho (STY)]SSSWNLNDLPHADGQPVDPQGDDKSLLNETFDLK_	-	lysophospholipase NTE1	#N/A	#N/A	#N/A	#N/A	1.02223	#N/A
CNAG_01298	_RYS[Phospho (STY)]SSWNLNDLPHADGQPVDPQGDDKSLLNETFDLK_	-	lysophospholipase NTE1	#N/A	#N/A	#N/A	#N/A	1.0122	#N/A
CNAG_01298	_RYSS[Phospho (STY)]S[Phospho (STY)]WNLNDLPHADGQPVDPQGDDKSLLNETFDLK_	-	lysophospholipase NTE1	#N/A	#N/A	#N/A	#N/A	#N/A	3.63177
CNAG_01298	_RYSSS[Phospho (STY)]WNLNDLPHADGQPVDPQGDDKSLLNETFDLK_	-	lysophospholipase NTE1	#N/A	#N/A	#N/A	#N/A	1.019	#N/A
CNAG_01298	_SIGLYQESESNS[Phospho (STY)]DMIAR_	-	lysophospholipase NTE1	#N/A	#N/A	#N/A	4.33642	3.8096	3.97334
CNAG_01303	_YLST[Phospho (STY)]ELR_	-	hypothetical protein, variant	#N/A	3.11374	#N/A	#N/A	#N/A	#N/A
CNAG_01305	_EAEGLLMDVHDPS[Phospho (STY)]KGPVLPK_	-	methionine-tRNA ligase	#N/A	6.09975	#N/A	#N/A	#N/A	5.02998
CNAG_01306	_TSEPALVQS[Phospho (STY)]SVKSPSGLPSQLSSSQAIK_	-	chromodomain-helicase-DNA-binding protein 3, variant	1.35563	1.0114	1.49759	#N/A	#N/A	#N/A
CNAG_01306	_TSEPALVQSSVKSPSGLPSQLS[Phospho (STY)]SSQAIK_	-	chromodomain-helicase-DNA-binding protein 3, variant	#N/A	4.9066	4.62017	#N/A	#N/A	#N/A
CNAG_01310	_S[Phospho (STY)]KGGENQLDPVPK_	-	Nucleolar protein	#N/A	3.0928	#N/A	#N/A	#N/A	#N/A
CNAG_01315	_RPTLPY[Phospho (STY)]FQISVSDPTR_	-	protein transporter	#N/A	#N/A	4.12062	#N/A	#N/A	#N/A
CNAG_01315	_QSTPAPPT[Phospho (STY)]ENSPVHAK_	-	protein transporter	6.42899	6.33273	5.35286	#N/A	#N/A	#N/A
CNAG_01315	_ANTPTPRSPTSVPLPISSVTT[Phospho (STY)]PIATR_	-	protein transporter	#N/A	#N/A	5.37261	#N/A	#N/A	#N/A
CNAG_01315	_QST[Phospho (STY)]PAPPTENS[Phospho (STY)]PVHAK_	-	protein transporter	#N/A	5.42667	5.59818	#N/A	#N/A	#N/A
CNAG_01315	_QSTPAPPTENS[Phospho (STY)]PVHAK_	-	protein transporter	#N/A	#N/A	6.10397	#N/A	#N/A	#N/A
CNAG_01315	_VS[Phospho (STY)]VSPLDASSIEEPYK_	-	protein transporter	#N/A	4.77746	#N/A	#N/A	#N/A	#N/A
CNAG_01315	_RPT[Phospho (STY)]LPYFQISVSDPTR_	-	protein transporter	#N/A	4.79697	#N/A	#N/A	#N/A	#N/A
CNAG_01315	_NLIDDGLTEDGDS[Phospho (STY)]GRS[Phospho (STY)]LKR_	-	protein transporter	#N/A	#N/A	#N/A	#N/A	7.86097	7.12126
CNAG_01316	_HVSAT[Phospho (STY)]HIRPITDGNEVQHHLLK_	RPA32/RFA2	replication factor A2	#N/A	#N/A	#N/A	#N/A	#N/A	1.7052
CNAG_01318	_GVLAAS[Phospho (STY)]GAGAGGTSGTGSK_	-	sodium/hydrogen exchanger 3	#N/A	#N/A	#N/A	#N/A	4.29822	4.32371
CNAG_01322	_QEDSQSEDQVAT[Phospho (STY)]PPESTDTSRLDFEQNEEGTR_	-	hypothetical protein	8.84044	7.95554	8.05923	#N/A	#N/A	#N/A
CNAG_01330	_TGT[Phospho (STY)]EALR_	-	hypothetical protein	4.4355	#N/A	3.91209	-4.57681	#N/A	#N/A
CNAG_01330	_T[Phospho (STY)]ASQTVENR_	-	hypothetical protein	6.21709	#N/A	#N/A	#N/A	#N/A	#N/A
CNAG_01333	_TPMVASGQSTTQQRSPVT[Phospho (STY)]VIR_	ALK1	HASPIN protein kinase	#N/A	#N/A	2.14752	#N/A	#N/A	#N/A
CNAG_01333	_NEALKPLTS[Phospho (STY)]ARDLVNWGK_	ALK1	HASPIN protein kinase	#N/A	#N/A	#N/A	#N/A	#N/A	3.14803
CNAG_01334	_KAESAVT[Phospho (STY)]SNENASPR_	-	hypothetical protein	#N/A	#N/A	3.69303	#N/A	#N/A	#N/A
CNAG_01334	_SENNNFYSFSALNPQHPFS[Phospho (STY)]PSR_	-	hypothetical protein	#N/A	#N/A	4.89298	#N/A	#N/A	#N/A
CNAG_01334	_SENNNFYSFS[Phospho (STY)]ALNPQHPFSPSR_	-	hypothetical protein	#N/A	#N/A	4.90294	#N/A	#N/A	#N/A
CNAG_01334	_EKGTGDHNFGQSKEEFGEEIT[Phospho (STY)]NEAVIEDVQSR_	-	hypothetical protein	#N/A	4.3064	#N/A	#N/A	#N/A	#N/A
CNAG_01334	_PSSPAPVFS[Phospho (STY)]AMDDASAHPAK_	-	hypothetical protein	#N/A	6.26713	#N/A	#N/A	#N/A	#N/A
CNAG_01334	_STTPALS[Phospho (STY)]PPSK_	-	hypothetical protein	#N/A	6.3505	#N/A	#N/A	#N/A	#N/A
CNAG_01334	_ATEALIDGQSMAADSGETSLQSVVNHS[Phospho (STY)]AAGEAR_	-	hypothetical protein	9.78297	#N/A	#N/A	#N/A	#N/A	#N/A
CNAG_01334	_SSVSTTPMQERPS[Phospho (STY)]ASC[Carbamidomethyl (C)]DRR_	-	hypothetical protein	#N/A	#N/A	#N/A	2.68875	#N/A	#N/A
CNAG_01335	_GNMAQGDRADDTMDVEMRGS[Phospho (STY)]PGYHGSSTEAPR_	-	hypothetical protein	6.28061	6.39618	6.26042	#N/A	#N/A	#N/A
CNAG_01335	_RNSEANS[Phospho (STY)]PMLTPMNR_	-	hypothetical protein	6.37904	7.09261	6.69589	#N/A	#N/A	#N/A
CNAG_01335	_SHADS[Phospho (STY)]PPLNLEPSLFPGSPVAIPHSVNPLSHLER_	-	hypothetical protein	1.02263	1.05846	#N/A	#N/A	#N/A	#N/A
CNAG_01335	_RS[Phospho (STY)]LVFTADSAGPSINVDTEHLSTGIPSLPLPR_	-	hypothetical protein	#N/A	3.2637	#N/A	#N/A	#N/A	#N/A
CNAG_01335	_SAS[Phospho (STY)]PKLETR_	-	hypothetical protein	1.3309	#N/A	#N/A	#N/A	#N/A	#N/A
CNAG_01337	_DAAASSMTVNIVDPS[Phospho (STY)]R_	BUN62	WD-repeat protein, variant	#N/A	#N/A	4.51609	#N/A	4.50823	#N/A
CNAG_01337	_VLLATTNGPDPSLSS[Phospho (STY)]DSGTGLYLDREQDVELLK_	BUN62	WD-repeat protein, variant	#N/A	#N/A	#N/A	#N/A	3.62941	3.11351
CNAG_01337	_VLLATTNGPDPSLSSDSGTGLY[Phospho (STY)]LDREQDVELLK_	BUN62	WD-repeat protein, variant	#N/A	#N/A	#N/A	4.31716	#N/A	4.32169
CNAG_01338	_QGLGDGDEDDDEDEMEEVPIPNDEEKSVTPEAGS[Phospho (STY)]R_	-	xeroderma pigmentosum group C-complementing protein	#N/A	#N/A	5.05767	#N/A	#N/A	#N/A
CNAG_01338	_S[Phospho (STY)]VTPEAGSR_	-	xeroderma pigmentosum group C-complementing protein	#N/A	7.18346	7.24117	#N/A	-2.84621	#N/A
CNAG_01340	_HS[Phospho (STY)]PAAYEYSSVR_	-	ATPase	#N/A	#N/A	1.32193	#N/A	#N/A	#N/A
CNAG_01340	_ERTSRPNY[Phospho (STY)]HIPTLEELSK_	-	ATPase	1.4171	#N/A	1.60262	#N/A	#N/A	#N/A
CNAG_01340	_TSRPNY[Phospho (STY)]HIPTLEELSK_	-	ATPase	1.09129	#N/A	1.65122	#N/A	#N/A	#N/A
CNAG_01340	_ERTS[Phospho (STY)]RPNYHIPTLEELSK_	-	ATPase	#N/A	#N/A	1.7571	-7.9205	#N/A	#N/A
CNAG_01340	_T[Phospho (STY)]SRPNYHIPTLEELSK_	-	ATPase	1.42544	#N/A	1.89234	#N/A	#N/A	#N/A
CNAG_01340	_TS[Phospho (STY)]RPNYHIPTLEELSK_	-	ATPase	#N/A	#N/A	1.96222	#N/A	#N/A	#N/A
CNAG_01340	_Y[Phospho (STY)]EDDFEHTTMSASPEMQSGR_	-	ATPase	#N/A	#N/A	5.65348	#N/A	#N/A	#N/A
CNAG_01340	_YEDDFEHTT[Phospho (STY)]MSASPEMQSGRR_	-	ATPase	#N/A	#N/A	5.88295	#N/A	#N/A	#N/A
CNAG_01342	_SAFGFTNAS[Phospho (STY)]DSRSPANSYSPLNSAFK_	-	hypothetical protein	5.34919	4.81533	5.24346	#N/A	#N/A	#N/A
CNAG_01342	_SAFGFTNASDSRS[Phospho (STY)]PANSYSPLNSAFK_	-	hypothetical protein	7.05789	6.13259	6.64382	#N/A	#N/A	#N/A
CNAG_01344	_LLYPS[Phospho (STY)]RPGS[Phospho (STY)]HNPSFTSINK_	-	hypothetical protein	#N/A	#N/A	#N/A	#N/A	1.44642	#N/A
CNAG_01345	_STLSVY[Phospho (STY)]IPEGSTAVPK_	-	small subunit ribosomal protein S2	7.12505	8.31148	7.46804	#N/A	#N/A	#N/A
CNAG_01345	_S[Phospho (STY)]APSPHEATLSTLLASGAALGHAANITSHAYTPYIYGK_	-	small subunit ribosomal protein S2	3.96262	#N/A	#N/A	#N/A	#N/A	#N/A
CNAG_01352	_S[Phospho (STY)]LTPDDENDVTTRPLKR_	RAD9	hypothetical protein	#N/A	#N/A	4.62187	#N/A	#N/A	#N/A
CNAG_01352	_QSTHAMPESQESTQQLS[Phospho (STY)]PK_	RAD9	hypothetical protein	5.78054	5.91201	5.99331	#N/A	#N/A	#N/A
CNAG_01352	_IVPVGPSPQAIELDQS[Phospho (STY)]R_	RAD9	hypothetical protein	#N/A	#N/A	7.34203	#N/A	#N/A	#N/A
CNAG_01352	_SNIFQAT[Phospho (STY)]QVVRQPSGPLYEADPSSSAAITSPR_	RAD9	hypothetical protein	#N/A	#N/A	#N/A	#N/A	#N/A	3.18734
CNAG_01352	_SNIFQATQVVRQPS[Phospho (STY)]GPLYEADPSSSAAITSPR_	RAD9	hypothetical protein	#N/A	#N/A	#N/A	#N/A	#N/A	5.69394
CNAG_01354	_[Acetyl (Protein N-term)]S[Phospho (STY)]AEKLEAANALSNASDSK_	-	hypothetical protein	6.1714	6.73393	7.1776	#N/A	#N/A	#N/A
CNAG_01354	_LEAANALSNAS[Phospho (STY)]DSKTPSTIPDHR_	-	hypothetical protein	#N/A	3.5806	#N/A	#N/A	#N/A	#N/A
CNAG_01354	_[Acetyl (Protein N-term)]SAEKLEAANALSNASDSKT[Phospho (STY)]PSTIPDHR_	-	hypothetical protein	4.85053	#N/A	#N/A	#N/A	-1.32902	#N/A
CNAG_01354	_[Acetyl (Protein N-term)]SAEKLEAANALSNASDSKTPST[Phospho (STY)]IPDHR_	-	hypothetical protein	#N/A	#N/A	#N/A	#N/A	#N/A	3.98808
CNAG_01360	_VPT[Phospho (STY)]RSPTISTAHLGLPAS[Phospho (STY)]PSDSPTR_	-	pumilio domain-containing protein c	#N/A	1.08175	1.00684	#N/A	#N/A	#N/A
CNAG_01360	_LSISSHT[Phospho (STY)]SRTGT[Phospho (STY)]PEDKGSSTPQVPTR_	-	pumilio domain-containing protein c	#N/A	#N/A	1.01634	#N/A	#N/A	#N/A
CNAG_01360	_LSISSHTSRTGTPEDKGSS[Phospho (STY)]T[Phospho (STY)]PQVPTR_	-	pumilio domain-containing protein c	#N/A	#N/A	1.02199	#N/A	#N/A	#N/A
CNAG_01360	_LS[Phospho (STY)]ISS[Phospho (STY)]HT[Phospho (STY)]S[Phospho (STY)]RT[Phospho (STY)]GTPEDKGSSTPQVPTR_	-	pumilio domain-containing protein c	#N/A	#N/A	1.02533	#N/A	#N/A	#N/A
CNAG_01360	_VPTRSPTIS[Phospho (STY)]TAHLGLPAS[Phospho (STY)]PSDSPTR_	-	pumilio domain-containing protein c	#N/A	1.17351	1.03024	#N/A	#N/A	#N/A
CNAG_01360	_VPTRSPTIST[Phospho (STY)]AHLGLPAS[Phospho (STY)]PS[Phospho (STY)]DSPTR_	-	pumilio domain-containing protein c	#N/A	#N/A	1.03058	#N/A	#N/A	#N/A
CNAG_01360	_VPTRS[Phospho (STY)]PTISTAHLGLPAS[Phospho (STY)]PSDSPTR_	-	pumilio domain-containing protein c	#N/A	1.14871	1.04119	#N/A	#N/A	#N/A
CNAG_01360	_LSISSHTS[Phospho (STY)]RTGT[Phospho (STY)]PEDKGSSTPQVPTR_	-	pumilio domain-containing protein c	#N/A	#N/A	1.04209	#N/A	#N/A	#N/A
CNAG_01360	_LSISSHTSRT[Phospho (STY)]GT[Phospho (STY)]PEDKGSSTPQVPTR_	-	pumilio domain-containing protein c	#N/A	#N/A	1.04211	#N/A	#N/A	#N/A
CNAG_01360	_LSSPGSMMSPASDPFNPFASPS[Phospho (STY)]IDVQYPSQGSMR_	-	pumilio domain-containing protein c	#N/A	#N/A	1.04268	#N/A	#N/A	#N/A
CNAG_01360	_LSSPGSMMSPASDPFNPFAS[Phospho (STY)]PSIDVQYPSQGSMR_	-	pumilio domain-containing protein c	#N/A	#N/A	1.07535	#N/A	#N/A	#N/A
CNAG_01360	_VPTRSPT[Phospho (STY)]ISTAHLGLPAS[Phospho (STY)]PSDS[Phospho (STY)]PTR_	-	pumilio domain-containing protein c	#N/A	#N/A	1.12837	#N/A	#N/A	#N/A
CNAG_01360	_S[Phospho (STY)]SLSPEKVPHR_	-	pumilio domain-containing protein c	#N/A	1.01419	1.18394	#N/A	#N/A	#N/A
CNAG_01360	_VPTRS[Phospho (STY)]PTISTAHLGLPAS[Phospho (STY)]PSDS[Phospho (STY)]PTR_	-	pumilio domain-containing protein c	#N/A	#N/A	1.36403	#N/A	#N/A	#N/A
CNAG_01360	_LSIS[Phospho (STY)]SHTSR_	-	pumilio domain-containing protein c	#N/A	#N/A	1.41491	#N/A	#N/A	#N/A
CNAG_01360	_PFRPSVTSMHSFTQETNPY[Phospho (STY)]DNGQSEEEALAR_	-	pumilio domain-containing protein c	#N/A	#N/A	1.43014	#N/A	#N/A	#N/A
CNAG_01360	_VPTRSPTIST[Phospho (STY)]AHLGLPAS[Phospho (STY)]PSDS[Phospho (STY)]PTR_	-	pumilio domain-containing protein c	#N/A	#N/A	1.44073	#N/A	#N/A	#N/A
CNAG_01360	_PFRPSVTSMHSFT[Phospho (STY)]QETNPYDNGQSEEEALAR_	-	pumilio domain-containing protein c	#N/A	#N/A	1.45685	#N/A	#N/A	#N/A
CNAG_01360	_LSSPGSMMSPASDPFNPFASPS[Phospho (STY)]IDVQYPSQGSM[Oxidation (M)]R_	-	pumilio domain-containing protein c	#N/A	1.37593	1.51399	#N/A	#N/A	#N/A
CNAG_01360	_PFRPSVTSMHS[Phospho (STY)]FTQETNPYDNGQSEEEALAR_	-	pumilio domain-containing protein c	#N/A	#N/A	1.52839	#N/A	#N/A	#N/A
CNAG_01360	_PFRPSVTS[Phospho (STY)]MHSFTQETNPYDNGQSEEEALAR_	-	pumilio domain-containing protein c	#N/A	#N/A	1.53992	#N/A	#N/A	#N/A
CNAG_01360	_PFRPSVT[Phospho (STY)]SMHSFTQETNPYDNGQSEEEALAR_	-	pumilio domain-containing protein c	#N/A	#N/A	1.53994	#N/A	#N/A	#N/A
CNAG_01360	_MLLEAVGLPVPAGYVSGS[Phospho (STY)]PFGR_	-	pumilio domain-containing protein c	1.58506	#N/A	1.58775	#N/A	#N/A	#N/A
CNAG_01360	_MLLEAVGLPVPAGYVS[Phospho (STY)]GSPFGR_	-	pumilio domain-containing protein c	1.59172	#N/A	1.59467	#N/A	#N/A	#N/A
CNAG_01360	_LSISSHTS[Phospho (STY)]RTGTPEDKGSSTPQVPTR_	-	pumilio domain-containing protein c	#N/A	#N/A	4.67177	#N/A	-1.07496	#N/A
CNAG_01360	_[Acetyl (Protein N-term)]AQPPPT[Phospho (STY)]APRS[Phospho (STY)]SLSPEKVPHR_	-	pumilio domain-containing protein c	7.56923	7.53723	6.70757	#N/A	-1.0105	#N/A
CNAG_01360	_AST[Phospho (STY)]VSNFAR_	-	pumilio domain-containing protein c	#N/A	#N/A	6.98788	#N/A	#N/A	#N/A
CNAG_01360	_TSALS[Phospho (STY)]PAYPQTASR_	-	pumilio domain-containing protein c	#N/A	#N/A	7.40136	#N/A	#N/A	#N/A
CNAG_01360	_[Acetyl (Protein N-term)]AQPPPT[Phospho (STY)]APRSSLS[Phospho (STY)]PEKVPHR_	-	pumilio domain-containing protein c	7.85257	8.60828	7.60088	#N/A	-1.15431	#N/A
CNAG_01360	_LSSPGS[Phospho (STY)]MMS[Phospho (STY)]PAS[Phospho (STY)]DPFNPFASPSIDVQYPSQGSMR_	-	pumilio domain-containing protein c	#N/A	3.28134	#N/A	#N/A	#N/A	#N/A
CNAG_01360	_M[Oxidation (M)]LLEAVGLPVPAGYVSGS[Phospho (STY)]PFGR_	-	pumilio domain-containing protein c	1.11386	#N/A	#N/A	#N/A	#N/A	#N/A
CNAG_01360	_M[Oxidation (M)]LLEAVGLPVPAGY[Phospho (STY)]VSGSPFGR_	-	pumilio domain-containing protein c	1.14964	#N/A	#N/A	#N/A	#N/A	#N/A
CNAG_01360	_GNPQPGKS[Phospho (STY)]PR_	-	pumilio domain-containing protein c	7.07506	#N/A	#N/A	6.66981	#N/A	5.36448
CNAG_01360	_AGT[Phospho (STY)]MPSNLEVASR_	-	pumilio domain-containing protein c	#N/A	#N/A	#N/A	#N/A	#N/A	1.09237
CNAG_01360	_LSISSHTSRTGT[Phospho (STY)]PEDK_	-	pumilio domain-containing protein c	#N/A	#N/A	#N/A	#N/A	3.8792	4.21203
CNAG_01360	_TSALSPAYPQTAS[Phospho (STY)]R_	-	pumilio domain-containing protein c	#N/A	#N/A	#N/A	6.09043	6.58475	#N/A
CNAG_01362	_VGT[Phospho (STY)]PIPSVFTPTTLTR_	-	cell cycle control protein cwf19	#N/A	#N/A	1.30895	#N/A	2.41202	#N/A
CNAG_01362	_VGT[Phospho (STY)]PIPSVFT[Phospho (STY)]PTTLTR_	-	cell cycle control protein cwf19	#N/A	#N/A	1.61575	#N/A	2.08912	-3.32228
CNAG_01362	_VGT[Phospho (STY)]PIPS[Phospho (STY)]VFTPTTLTR_	-	cell cycle control protein cwf19	#N/A	#N/A	1.68332	#N/A	#N/A	-3.87438
CNAG_01362	_RPGEDLEQGATPAS[Phospho (STY)]SAGR_	-	cell cycle control protein cwf19	#N/A	#N/A	4.41023	#N/A	#N/A	#N/A
CNAG_01362	_GVSRPLGPGS[Phospho (STY)]DSSRPATPSGNSSGMR_	-	cell cycle control protein cwf19	#N/A	4.91708	5.64543	#N/A	#N/A	#N/A
CNAG_01362	_SLDPTNAVANIPTADSLPLTSNPS[Phospho (STY)]GPK_	-	cell cycle control protein cwf19	6.68009	6.46259	6.92672	#N/A	#N/A	#N/A
CNAG_01362	_NAGEQTFGTGGGS[Phospho (STY)]GNRPGS[Phospho (STY)]R_	-	cell cycle control protein cwf19	1.59935	#N/A	#N/A	#N/A	#N/A	#N/A
CNAG_01362	_DNGGLGT[Phospho (STY)]PK_	-	cell cycle control protein cwf19	#N/A	#N/A	#N/A	#N/A	#N/A	2.88164
CNAG_01362	_VGTPIPS[Phospho (STY)]VFTPTTLTR_	-	cell cycle control protein cwf19	#N/A	#N/A	#N/A	#N/A	1.40206	#N/A
CNAG_01362	_VGTPIPSVFTPTT[Phospho (STY)]LTR_	-	cell cycle control protein cwf19	#N/A	#N/A	#N/A	#N/A	1.3444	#N/A
CNAG_01365	_AVEDDKRASHS[Phospho (STY)]S[Phospho (STY)]TPTGGVEGR_	-	hypothetical protein	#N/A	#N/A	1.2656	#N/A	#N/A	#N/A
CNAG_01365	_[Acetyl (Protein N-term)]MDDNHFHLQDHEHT[Phospho (STY)]PNHDDTAEALIASLK_	-	hypothetical protein	#N/A	2.2331	2.73321	#N/A	#N/A	#N/A
CNAG_01365	_AQYDALLVSGSPSS[Phospho (STY)]VATGK_	-	hypothetical protein	1.11985	-4.29691	#N/A	#N/A	#N/A	#N/A
CNAG_01372	_AMQS[Phospho (STY)]GSDLDAAVAYNQEVQEK_	-	hypothetical protein	#N/A	#N/A	4.15259	#N/A	#N/A	#N/A
CNAG_01372	_ASVTPGPSAFATEAPSSFLGTEELRT[Phospho (STY)]PNAAR_	-	hypothetical protein	#N/A	#N/A	#N/A	#N/A	#N/A	1.29448
CNAG_01375	_MAAFSGS[Phospho (STY)]HASSPVLPQPSGNK_	ABP1	Putative actin-binding protein	#N/A	#N/A	3.75367	#N/A	#N/A	#N/A
CNAG_01375	_LKQDLTLEEAPT[Phospho (STY)]TGPPPPIPEATRPR_	ABP1	Putative actin-binding protein	#N/A	6.35287	5.9202	#N/A	#N/A	#N/A
CNAG_01375	_WNPGGAQEERNEES[Phospho (STY)]PAKMPSIK_	ABP1	Putative actin-binding protein	#N/A	6.59215	6.43803	#N/A	#N/A	#N/A
CNAG_01375	_MAAFSGSHASS[Phospho (STY)]PVLPQPSGNK_	ABP1	Putative actin-binding protein	1.0861	#N/A	#N/A	#N/A	#N/A	#N/A
CNAG_01376	_PGPPPGLS[Phospho (STY)]LSPGAGVNVLGQR_	-	stress response protein NST1, variant	#N/A	#N/A	4.60566	#N/A	#N/A	#N/A
CNAG_01376	_PGPPPGLSLS[Phospho (STY)]PGAGVNVLGQR_	-	stress response protein NST1, variant	#N/A	5.09452	4.88686	#N/A	#N/A	#N/A
CNAG_01376	_GFTDPSPPGFDHS[Phospho (STY)]LR_	-	stress response protein NST1, variant	6.98585	7.26153	7.20533	#N/A	#N/A	#N/A
CNAG_01376	_MPLGQSFGPPGLRPTYPAGSPAYSPPHANGSS[Phospho (STY)]ISPNPPPR_	-	stress response protein NST1, variant	6.47577	#N/A	#N/A	#N/A	#N/A	#N/A
CNAG_01384	_TSVDSNRLVANTSDAY[Phospho (STY)]MPDTMPDHK_	-	hypothetical protein	#N/A	1.65019	-5.00195	#N/A	#N/A	#N/A
CNAG_01384	_QAVAEQIAAMS[Phospho (STY)]PEEFQAMEKQLLWK_	-	hypothetical protein	#N/A	#N/A	#N/A	#N/A	4.95961	#N/A
CNAG_01385	_HGEPSSYIAPDVAEEETTPLAHPVGLT[Phospho (STY)]PPLLPAASSLHPLPR_	GGT1	Glycosylinositolphosphoceramide galactosyltransferase	#N/A	#N/A	1.13773	#N/A	#N/A	#N/A
CNAG_01385	_SY[Phospho (STY)]SHSTSTDAYTPATPTNENGHTGITR_	GGT1	Glycosylinositolphosphoceramide galactosyltransferase	#N/A	#N/A	4.67711	#N/A	#N/A	#N/A
CNAG_01388	_FTLFFDEVRPEPHS[Phospho (STY)]PPER_	-	hypothetical protein	#N/A	#N/A	1.00692	#N/A	#N/A	#N/A
CNAG_01388	_ESS[Phospho (STY)]PAESQS[Phospho (STY)]S[Phospho (STY)]EVFDPLGNGPSIR_	-	hypothetical protein	4.73439	#N/A	3.78874	#N/A	#N/A	#N/A
CNAG_01388	_S[Phospho (STY)]LFDFPLESPIPFVGGSSSSVR_	-	hypothetical protein	4.00655	3.05089	4.32744	#N/A	#N/A	#N/A
CNAG_01388	_RASS[Phospho (STY)]PASTIR_	-	hypothetical protein	5.70335	5.25897	4.46448	#N/A	#N/A	#N/A
CNAG_01388	_VESQQRPLS[Phospho (STY)]AESHAATLR_	-	hypothetical protein	#N/A	#N/A	5.71397	#N/A	#N/A	#N/A
CNAG_01388	_RAS[Phospho (STY)]SPASTIR_	-	hypothetical protein	#N/A	4.8685	#N/A	#N/A	-1.55026	#N/A
CNAG_01388	_DGTANSLHT[Phospho (STY)]R_	-	hypothetical protein	#N/A	#N/A	#N/A	#N/A	2.59379	2.17346
CNAG_01395	_AAY[Phospho (STY)]FGNEDGSVTIRSDDGTVSQL_	-	Ribose-5-phosphate isomerase	#N/A	-6.49666	#N/A	#N/A	3.29023	#N/A
CNAG_01395	_AAYFGNEDGSVT[Phospho (STY)]IRSDDGTVSQL_	-	Ribose-5-phosphate isomerase	#N/A	#N/A	#N/A	#N/A	4.48965	#N/A
CNAG_01399	_QPQWAPPPSSSTPPSS[Phospho (STY)]QPQMSPDQAAMAR_	-	hypothetical protein	#N/A	#N/A	#N/A	5.68815	#N/A	4.97246
CNAG_01400	_[Acetyl (Protein N-term)]SATPS[Phospho (STY)]PDRNRPLDDNK_	-	3-deoxy-7-phosphoheptulonate synthase	#N/A	#N/A	4.43673	#N/A	#N/A	#N/A
CNAG_01400	_RT[Phospho (STY)]TSSIVR_	-	3-deoxy-7-phosphoheptulonate synthase	8.13695	8.43847	8.24282	#N/A	#N/A	5.53906
CNAG_01404	_APSRSGVTS[Phospho (STY)]TAVS[Phospho (STY)]GAATPAVAEPVPSKK_	-	hsp71-like protein	#N/A	#N/A	#N/A	#N/A	2.54568	#N/A
CNAG_01404	_APSRSGVTSTAVS[Phospho (STY)]GAAT[Phospho (STY)]PAVAEPVPSKK_	-	hsp71-like protein	#N/A	#N/A	#N/A	#N/A	3.13048	2.75253
CNAG_01405	_NDGGVGVGIY[Phospho (STY)]SPR_	-	hypothetical protein	#N/A	4.15944	#N/A	#N/A	#N/A	#N/A
CNAG_01406	_QATSGMDAEVENTRSPIAGPS[Phospho (STY)]TATR_	-	hypothetical protein	#N/A	#N/A	#N/A	#N/A	5.79336	5.27326
CNAG_01408	_HRTEPFIDLHAPSPS[Phospho (STY)]LSSALAPSVDVPQIAPLFGK_	-	PH and SEC7 domain-containing protein	#N/A	#N/A	1.44531	#N/A	1.10965	#N/A
CNAG_01408	_AIDDQGGEKDWQSS[Phospho (STY)]S[Phospho (STY)]EGPSPLLPSSAK_	-	PH and SEC7 domain-containing protein	#N/A	#N/A	1.61101	#N/A	#N/A	#N/A
CNAG_01408	_QAQGS[Phospho (STY)]PS[Phospho (STY)]SPARPQSNLSDKIDR_	-	PH and SEC7 domain-containing protein	#N/A	3.83984	4.06088	#N/A	#N/A	#N/A
CNAG_01408	_KASC[Carbamidomethyl (C)]VTTTSTTSTGTGDT[Phospho (STY)]PTR_	-	PH and SEC7 domain-containing protein	#N/A	#N/A	4.29877	#N/A	#N/A	#N/A
CNAG_01408	_AS[Phospho (STY)]VDTVEDMDDDELALLGAPWAK_	-	PH and SEC7 domain-containing protein	#N/A	#N/A	4.55783	#N/A	#N/A	#N/A
CNAG_01408	_MSVFS[Phospho (STY)]QK_	-	PH and SEC7 domain-containing protein	#N/A	#N/A	4.61503	#N/A	3.42333	3.51475
CNAG_01408	_NVSGSS[Phospho (STY)]NRQSLVSLASNSPYDSR_	-	PH and SEC7 domain-containing protein	#N/A	6.79101	5.61631	#N/A	#N/A	#N/A
CNAG_01408	_ILLPISGIPGNDRNVS[Phospho (STY)]GSSNR_	-	PH and SEC7 domain-containing protein	6.28173	5.77657	5.78865	#N/A	#N/A	#N/A
CNAG_01408	_FGSSGGAESTDRPS[Phospho (STY)]PIAPSAWAR_	-	PH and SEC7 domain-containing protein	#N/A	6.86181	7.35782	#N/A	#N/A	#N/A
CNAG_01408	_STSAPVISAQIHQHAPPY[Phospho (STY)]ASANSSLSVAGIPADGK_	-	PH and SEC7 domain-containing protein	7.47424	#N/A	7.94464	#N/A	#N/A	4.86221
CNAG_01408	_SRTPT[Phospho (STY)]PSTMSGR_	-	PH and SEC7 domain-containing protein	#N/A	#N/A	9.05792	-7.27683	#N/A	#N/A
CNAG_01408	_ALGSGSGGST[Phospho (STY)]GQFDK_	-	PH and SEC7 domain-containing protein	#N/A	6.99757	#N/A	#N/A	5.88496	#N/A
CNAG_01408	_ALGS[Phospho (STY)]GSGGSTGQFDK_	-	PH and SEC7 domain-containing protein	#N/A	7.60147	#N/A	#N/A	#N/A	#N/A
CNAG_01408	_NVSGSSNRQSLVS[Phospho (STY)]LASNSPYDSR_	-	PH and SEC7 domain-containing protein	3.77109	#N/A	#N/A	#N/A	#N/A	#N/A
CNAG_01408	_GSS[Phospho (STY)]PLHVR_	-	PH and SEC7 domain-containing protein	6.42782	#N/A	#N/A	4.20626	#N/A	#N/A
CNAG_01408	_DTSSTPAPSLSTSTS[Phospho (STY)]AR_	-	PH and SEC7 domain-containing protein	#N/A	#N/A	#N/A	#N/A	#N/A	4.68217
CNAG_01408	_EQPS[Phospho (STY)]PSAPR_	-	PH and SEC7 domain-containing protein	#N/A	#N/A	#N/A	6.00173	5.88561	6.37205
CNAG_01408	_HRTEPFIDLHAPS[Phospho (STY)]PSLSSALAPSVDVPQIAPLFGK_	-	PH and SEC7 domain-containing protein	#N/A	#N/A	#N/A	#N/A	1.13632	#N/A
CNAG_01408	_HRTEPFIDLHAPSPSLS[Phospho (STY)]SALAPSVDVPQIAPLFGK_	-	PH and SEC7 domain-containing protein	#N/A	#N/A	#N/A	#N/A	1.10965	#N/A
CNAG_01408	_VAVDQVEDESDRMSVFS[Phospho (STY)]QK_	-	PH and SEC7 domain-containing protein	#N/A	#N/A	#N/A	4.59574	4.23405	4.32706
CNAG_01412	_SPVLGTASTLLPS[Phospho (STY)]PLKPSPSK_	PAH1	phosphatidate phosphatase LPIN	#N/A	#N/A	1.23108	#N/A	#N/A	#N/A
CNAG_01412	_SPVLGTASTLLPSPLKPSPS[Phospho (STY)]K_	PAH1	phosphatidate phosphatase LPIN	#N/A	#N/A	1.25138	#N/A	#N/A	#N/A
CNAG_01412	_TETAPART[Phospho (STY)]TPVPGTPSTDVQGQDK_	PAH1	phosphatidate phosphatase LPIN	#N/A	5.83767	4.9262	#N/A	#N/A	#N/A
CNAG_01412	_SADTEVPSSRGDEDEDEDEDDDAHT[Phospho (STY)]PVK_	PAH1	phosphatidate phosphatase LPIN	#N/A	1.45601	#N/A	#N/A	#N/A	#N/A
CNAG_01412	_FKPEYTDFNYWRDPVPDIPLPDFSPPS[Phospho (STY)]PALS[Phospho (STY)]AR_	PAH1	phosphatidate phosphatase LPIN	#N/A	#N/A	#N/A	#N/A	1.09881	1.03076
CNAG_01412	_SLS[Phospho (STY)]SMPGSFEDDRGK_	PAH1	phosphatidate phosphatase LPIN	#N/A	#N/A	#N/A	#N/A	1.01077	#N/A
CNAG_01413	_RPHLY[Phospho (STY)]VGNLSPR_	PUB1	nucleolysin TIA-1/TIAR	#N/A	#N/A	6.84826	#N/A	#N/A	#N/A
CNAG_01414	_YDAPSPVQEY[Phospho (STY)]RAPS[Phospho (STY)]PAS[Phospho (STY)]ASVPSKPAFK_	-	hypothetical protein	5.41965	4.31307	4.88965	#N/A	#N/A	#N/A
CNAG_01414	_YDAPSPVQEY[Phospho (STY)]RAPSPASASVPSK_	-	hypothetical protein	#N/A	-9.06241	#N/A	#N/A	5.52308	#N/A
CNAG_01414	_YDAPSPVQEYRAPS[Phospho (STY)]PASASVPSK_	-	hypothetical protein	#N/A	#N/A	#N/A	#N/A	6.41431	#N/A
CNAG_01414	_YDAPSPVQEYRAPSPAS[Phospho (STY)]ASVPSK_	-	hypothetical protein	#N/A	#N/A	#N/A	#N/A	#N/A	5.63179
CNAG_01415	_ADSSS[Phospho (STY)]FLLPPSSR_	-	cytoplasmic protein	1.47892	#N/A	1.42914	#N/A	#N/A	#N/A
CNAG_01415	_VQDTPDAEDKDLGS[Phospho (STY)]SLK_	-	cytoplasmic protein	6.27113	5.51304	5.98045	#N/A	#N/A	#N/A
CNAG_01415	_VQDTPDAEDKDLGSS[Phospho (STY)]LK_	-	cytoplasmic protein	#N/A	6.95721	7.62816	#N/A	#N/A	#N/A
CNAG_01415	_ADSS[Phospho (STY)]SFLLPPSSR_	-	cytoplasmic protein	#N/A	#N/A	#N/A	#N/A	1.02311	#N/A
CNAG_01416	_AQPTTKPILELLPALS[Phospho (STY)]PPVDK_	-	hypothetical protein	#N/A	#N/A	#N/A	#N/A	#N/A	1.12883
CNAG_01417	_PAASLTLS[Phospho (STY)]SLR_	-	hypothetical protein	#N/A	#N/A	-4.27686	#N/A	7.73524	7.31394
CNAG_01418	_AGS[Phospho (STY)]GT[Phospho (STY)]TTPVAR_	-	hypothetical protein	#N/A	#N/A	#N/A	#N/A	6.04081	#N/A
CNAG_01419	_AKS[Phospho (STY)]GNTTQSGGYTHDHQEEAK_	-	hypothetical protein	1.97565	#N/A	1.77069	#N/A	3.96176	4.11731
CNAG_01420	_SLFTGQGPLAPGSAPLLPS[Phospho (STY)]PTR_	-	hypothetical protein	2.26626	1.65681	2.42781	1.8009	1.35626	1.72225
CNAG_01420	_SLFTGQGPLAPGSAPLLPSPT[Phospho (STY)]R_	-	hypothetical protein	#N/A	#N/A	4.83387	1.83042	1.5284	2.37305
CNAG_01420	_SLFTGQGPLAPGS[Phospho (STY)]APLLPSPT[Phospho (STY)]R_	-	hypothetical protein	5.06229	#N/A	5.18874	#N/A	#N/A	#N/A
CNAG_01420	_SLFTGQGPLAPGS[Phospho (STY)]APLLPS[Phospho (STY)]PTR_	-	hypothetical protein	6.81639	5.12892	7.13526	6.53904	5.5379	5.71386
CNAG_01422	_SHS[Phospho (STY)]IMSATRR_	-	endoplasmic reticulum protein	1.43312	-7.56476	#N/A	#N/A	#N/A	4.26508
CNAG_01422	_IELIEEDS[Phospho (STY)]S[Phospho (STY)]DEEDEEWGNYAQPDFR_	-	endoplasmic reticulum protein	#N/A	#N/A	#N/A	#N/A	1.08521	#N/A
CNAG_01424	_ATS[Phospho (STY)]PLPSTVTSQIQSLGR_	-	hypothetical protein	1.21736	#N/A	1.21414	#N/A	#N/A	#N/A
CNAG_01424	_ATSPLPST[Phospho (STY)]VTSQIQSLGR_	-	hypothetical protein	#N/A	#N/A	1.39787	#N/A	#N/A	#N/A
CNAG_01424	_EMGEDASMSEST[Phospho (STY)]EQK_	-	hypothetical protein	#N/A	#N/A	5.07266	#N/A	#N/A	#N/A
CNAG_01424	_SLKDSSST[Phospho (STY)]LGHPTSSPSR_	-	hypothetical protein	#N/A	6.00892	5.74346	6.94966	#N/A	#N/A
CNAG_01424	_S[Phospho (STY)]LKDSSSTLGHPTSSPSR_	-	hypothetical protein	7.8436	7.51023	7.4915	#N/A	#N/A	#N/A
CNAG_01424	_SLKDS[Phospho (STY)]SSTLGHPTSSPSR_	-	hypothetical protein	#N/A	7.35121	7.7386	#N/A	5.42173	#N/A
CNAG_01424	_SLKDSSS[Phospho (STY)]TLGHPTSSPSR_	-	hypothetical protein	#N/A	7.25177	7.98849	#N/A	#N/A	#N/A
CNAG_01424	_AELEAVT[Phospho (STY)]GQLTK_	-	hypothetical protein	#N/A	#N/A	#N/A	#N/A	6.56758	#N/A
CNAG_01424	_EMGEDASMSES[Phospho (STY)]TEQK_	-	hypothetical protein	#N/A	#N/A	#N/A	#N/A	#N/A	3.89561
CNAG_01429	_AIPYASSQLSQAHPLS[Phospho (STY)]PPHK_	-	hypothetical protein	#N/A	#N/A	5.33565	#N/A	#N/A	#N/A
CNAG_01430	_EEGGDT[Phospho (STY)]EGEEEDEER_	-	hypothetical protein	#N/A	1.34179	#N/A	#N/A	#N/A	#N/A
CNAG_01431	_SPLPDTFSRS[Phospho (STY)]PAPLSANDQIAILR_	HOB1	hypothetical protein	1.08502	#N/A	1.04014	#N/A	#N/A	#N/A
CNAG_01431	_QSFIALSPTSVAT[Phospho (STY)]SIAGPSTLRR_	HOB1	hypothetical protein	#N/A	#N/A	2.48338	#N/A	#N/A	#N/A
CNAG_01431	_SPLPDTFSRSPAPLS[Phospho (STY)]ANDQIAILR_	HOB1	hypothetical protein	6.99943	6.66417	6.9346	#N/A	#N/A	#N/A
CNAG_01431	_DARDTHS[Phospho (STY)]PGQTDMQTELAK_	HOB1	hypothetical protein	#N/A	5.15922	#N/A	#N/A	#N/A	1.33582
CNAG_01432	_C[Carbamidomethyl (C)]SATLTGHSS[Phospho (STY)]PILC[Carbamidomethyl (C)]C[Carbamidomethyl (C)]AQSPTGR_	RSA4	ribosome assembly protein 4, variant	6.43174	#N/A	#N/A	#N/A	#N/A	#N/A
CNAG_01435	_VEQFIVC[Carbamidomethyl (C)]EPEASPAELDAMVANSREFYES[Phospho (STY)]LGIPYR_	-	serine-tRNA ligase	#N/A	#N/A	#N/A	#N/A	#N/A	5.02987
CNAG_01438	_HEGMTM[Oxidation (M)]TPT[Phospho (STY)]MSMDGLAPPADIAR_	SWI6	Cell-cycle box factor subunit SWI6, putative	#N/A	#N/A	#N/A	#N/A	4.69869	#N/A
CNAG_01438	_HEGMTMTPT[Phospho (STY)]MSM[Oxidation (M)]DGLAPPADIAR_	SWI6	Cell-cycle box factor subunit SWI6, putative	#N/A	#N/A	#N/A	#N/A	5.52542	#N/A
CNAG_01438	_HEGMTMTPTMS[Phospho (STY)]MDGLAPPADIAR_	SWI6	Cell-cycle box factor subunit SWI6, putative	#N/A	#N/A	#N/A	#N/A	1.29101	#N/A
CNAG_01440	_EREEAYMSEQEGMDEMS[Phospho (STY)]FSPEMR_	-	hypothetical protein	#N/A	#N/A	1.47418	#N/A	#N/A	#N/A
CNAG_01440	_GLSRPTPNPNTQPS[Phospho (STY)]VHAHSPAT[Phospho (STY)]PRSDR_	-	hypothetical protein	#N/A	3.67718	3.98245	#N/A	#N/A	#N/A
CNAG_01440	_AAGNAAGS[Phospho (STY)]TGSETGEK_	-	hypothetical protein	3.32444	#N/A	#N/A	#N/A	#N/A	#N/A
CNAG_01440	_YLDYPLLTQLS[Phospho (STY)]DSLSSDTSSDLR_	-	hypothetical protein	#N/A	#N/A	#N/A	#N/A	3.51977	#N/A
CNAG_01445	_QPHQS[Phospho (STY)]AIYSPGPFR_	APG9	autophagy-like protein 9	#N/A	#N/A	4.68327	4.82254	5.74601	5.53759
CNAG_01446	_SYVEQASDFISGKLDS[Phospho (STY)]AASAVQPQQEK_	HSP12	heat shock protein, 12Kda	#N/A	#N/A	-7.04408	#N/A	5.52804	5.84121
CNAG_01446	_IGDAVS[Phospho (STY)]GDNR_	HSP12	heat shock protein, 12Kda	#N/A	#N/A	1.34939	#N/A	#N/A	#N/A
CNAG_01446	_SYVEQASDFIS[Phospho (STY)]GKLDSAASAVQPQQEK_	HSP12	heat shock protein, 12Kda	7.40019	#N/A	4.50233	#N/A	#N/A	#N/A
CNAG_01448	_GESTSSNYSSLASPS[Phospho (STY)]SPADDRDVK_	-	hypothetical protein	4.32888	4.45101	4.43577	#N/A	#N/A	#N/A
CNAG_01448	_ASIHLPSTASDFHHSSPSAIGYPT[Phospho (STY)]FGTSPTIVVR_	-	hypothetical protein	4.59378	4.11317	4.52262	#N/A	#N/A	#N/A
CNAG_01448	_IASPMPSTPSSPVPSRPPSPS[Phospho (STY)]LDGRPEPVR_	-	hypothetical protein	#N/A	6.24862	6.41172	#N/A	#N/A	#N/A
CNAG_01448	_ERGESTSSNYSS[Phospho (STY)]LASPSSPADDRDVK_	-	hypothetical protein	#N/A	8.82833	#N/A	#N/A	#N/A	#N/A
CNAG_01448	_S[Phospho (STY)]SGTSVVIAEPEVTNMAR_	-	hypothetical protein	-7.57909	#N/A	#N/A	#N/A	5.65523	#N/A
CNAG_01454	_EFKS[Phospho (STY)]DAVSTELSPANR_	STE12alpha	transcription factor STE12	#N/A	1.53452	1.69112	-6.93063	-7.33457	-7.55682
CNAG_01454	_SLLKGSPAY[Phospho (STY)]K_	STE12alpha	transcription factor STE12	#N/A	#N/A	4.45677	#N/A	#N/A	#N/A
CNAG_01454	_TSLSFQDNSLSS[Phospho (STY)]PHPNLNR_	STE12alpha	transcription factor STE12	3.1391	#N/A	4.50109	#N/A	#N/A	#N/A
CNAG_01454	_AAS[Phospho (STY)]LDPSIFK_	STE12alpha	transcription factor STE12	#N/A	5.76426	5.33592	#N/A	#N/A	#N/A
CNAG_01454	_S[Phospho (STY)]MTPSLPASGR_	STE12alpha	transcription factor STE12	#N/A	#N/A	5.73717	#N/A	#N/A	#N/A
CNAG_01454	_ALTTNLIGGMGSSGHLATGDSHGWPIQSAS[Phospho (STY)]PSLLHR_	STE12alpha	transcription factor STE12	7.49783	#N/A	6.8081	#N/A	#N/A	#N/A
CNAG_01454	_ALHSS[Phospho (STY)]PYHNNPLYNPYNPHSTDAAVANGQSFTR_	STE12alpha	transcription factor STE12	6.92766	6.94687	6.95715	#N/A	#N/A	#N/A
CNAG_01454	_HRS[Phospho (STY)]MTPSLPASGR_	STE12alpha	transcription factor STE12	7.51648	#N/A	7.9763	#N/A	#N/A	#N/A
CNAG_01454	_HRSMT[Phospho (STY)]PSLPASGR_	STE12alpha	transcription factor STE12	8.37396	#N/A	8.81472	#N/A	#N/A	#N/A
CNAG_01454	_SMT[Phospho (STY)]PSLPASGR_	STE12alpha	transcription factor STE12	5.88805	5.01141	#N/A	#N/A	#N/A	#N/A
CNAG_01454	_QPGLEESVNS[Phospho (STY)]NIRDIPAEQLASHDQGAPAPK_	STE12alpha	transcription factor STE12	#N/A	5.64365	#N/A	#N/A	#N/A	#N/A
CNAG_01454	_SDAVSTELS[Phospho (STY)]PANR_	STE12alpha	transcription factor STE12	#N/A	6.36985	#N/A	#N/A	#N/A	#N/A
CNAG_01454	_ALTTNLIGGMGSSGHLATGDS[Phospho (STY)]HGWPIQSASPSLLHR_	STE12alpha	transcription factor STE12	5.80422	#N/A	#N/A	#N/A	#N/A	#N/A
CNAG_01454	_HRSMTPS[Phospho (STY)]LPASGR_	STE12alpha	transcription factor STE12	7.48274	#N/A	#N/A	#N/A	#N/A	#N/A
CNAG_01457	_SSNAPDLSKMS[Phospho (STY)]PNRSS[Phospho (STY)]PPAQR_	BSP1	hypothetical protein	#N/A	#N/A	5.77192	#N/A	#N/A	#N/A
CNAG_01468	_STIVALQT[Phospho (STY)]SLLMSPR_	-	hypothetical protein	#N/A	1.22817	1.23354	#N/A	#N/A	#N/A
CNAG_01472	_[Acetyl (Protein N-term)]ASPS[Phospho (STY)]S[Phospho (STY)]IRDDHLTFTTSTSNSDTLPSTSHNPNTSTNSR_	-	endoplasmic reticulum protein	#N/A	#N/A	3.60312	#N/A	#N/A	#N/A
CNAG_01472	_LNNASTILSES[Phospho (STY)]EEGGDARLPQK_	-	endoplasmic reticulum protein	-6.81209	#N/A	#N/A	#N/A	2.75233	#N/A
CNAG_01476	_KGSGDDNDDADT[Phospho (STY)]DIER_	-	hypothetical protein	5.81476	5.08892	4.91485	#N/A	#N/A	#N/A
CNAG_01476	_SVTFES[Phospho (STY)]ASDGYAPR_	-	hypothetical protein	#N/A	#N/A	5.28499	#N/A	#N/A	5.03016
CNAG_01476	_NSPETSSTWAINESTPVPSRPSSS[Phospho (STY)]RPLSHENQSTK_	-	hypothetical protein	#N/A	6.04862	#N/A	#N/A	#N/A	#N/A
CNAG_01476	_RET[Phospho (STY)]EDGEEGYEDDEDLMPDPR_	-	hypothetical protein	#N/A	#N/A	#N/A	#N/A	4.21097	4.3576
CNAG_01477	_SSS[Phospho (STY)]PTPPTHENLSAR_	-	Serine palmitoyltransferase	1.22737	#N/A	1.07389	#N/A	#N/A	#N/A
CNAG_01477	_SSLLSVLTRPAHSVAATPDS[Phospho (STY)]PEEELSDLSTVSSYASSVISGTHSK_	-	Serine palmitoyltransferase	#N/A	#N/A	3.10258	#N/A	1.30084	1.88492
CNAG_01477	_PAHSVAATPDS[Phospho (STY)]PEEELSDLSTVSSYASSVISGTHSK_	-	Serine palmitoyltransferase	3.84054	#N/A	3.5995	#N/A	#N/A	#N/A
CNAG_01477	_PAHSVAAT[Phospho (STY)]PDSPEEELSDLSTVSSYASSVISGTHSK_	-	Serine palmitoyltransferase	#N/A	5.11962	4.73152	#N/A	#N/A	#N/A
CNAG_01477	_SSLLSVLT[Phospho (STY)]RPAHSVAATPDSPEEELSDLSTVSSYASSVISGTHSK_	-	Serine palmitoyltransferase	#N/A	#N/A	5.58626	#N/A	1.08516	1.58343
CNAG_01477	_SSLLSVLTRPAHSVAAT[Phospho (STY)]PDSPEEELSDLSTVSSYASSVISGTHSK_	-	Serine palmitoyltransferase	#N/A	#N/A	#N/A	#N/A	#N/A	1.47827
CNAG_01479	_NLFNFLHSFGGEGALT[Phospho (STY)]PDTQIPLSVFQQWYTNFTR_	-	hypothetical protein	5.15149	#N/A	#N/A	#N/A	#N/A	#N/A
CNAG_01480	_NLS[Phospho (STY)]GGVR_	-	large subunit ribosomal protein L12	#N/A	5.36115	5.48216	#N/A	-1.15567	#N/A
CNAG_01480	_EKNIKHSGNIPLDQIY[Phospho (STY)]DIAR_	-	large subunit ribosomal protein L12	5.81687	#N/A	#N/A	#N/A	#N/A	#N/A
CNAG_01481	_FT[Phospho (STY)]SPPSTPISTR_	-	hypothetical protein	1.3063	#N/A	#N/A	#N/A	#N/A	#N/A
CNAG_01483	_AAVEDNIYLDEAEDFILSHASSIAHS[Phospho (STY)]PSR_	HPI1	E3 ubiquitin ligase-like protein	#N/A	#N/A	#N/A	#N/A	1.03942	#N/A
CNAG_01485	_GDKVSIDDADLETHGVSDWS[Phospho (STY)]YHPAK_	-	D-lactate dehydrogenase (cytochrome)	#N/A	#N/A	4.60083	#N/A	#N/A	#N/A
CNAG_01485	_GLVAC[Carbamidomethyl (C)]HFGHVGDGNVHS[Phospho (STY)]LALFRDEAELHR_	-	D-lactate dehydrogenase (cytochrome)	5.11246	5.41396	6.15686	#N/A	#N/A	#N/A
CNAG_01489	_VKPPT[Phospho (STY)]PVEGEDTTQFELMVAGKPYLAMDK_	CAS9	maltose O-acetyltransferase	#N/A	4.46835	4.57717	#N/A	#N/A	#N/A
CNAG_01489	_VKPPTPVEGEDTT[Phospho (STY)]QFELMVAGKPYLAMDK_	CAS9	maltose O-acetyltransferase	6.03054	7.08471	7.19604	#N/A	#N/A	#N/A
CNAG_01492	_GRSTIFVDTST[Phospho (STY)]VYPTTAGR_	-	hypothetical protein	-8.55519	#N/A	-7.92071	#N/A	6.33696	#N/A
CNAG_01492	_GRSTIFVDT[Phospho (STY)]STVYPTTAGR_	-	hypothetical protein	#N/A	#N/A	-5.95541	5.54083	5.92918	5.29731
CNAG_01492	_TPLDEKPVPFS[Phospho (STY)]RPSTPTPAHDQLAFVGLGEMGK_	-	hypothetical protein	#N/A	1.04095	1.0936	#N/A	#N/A	#N/A
CNAG_01492	_TPLDEKPVPFSRPS[Phospho (STY)]TPTPAHDQLAFVGLGEMGK_	-	hypothetical protein	#N/A	1.04815	1.10027	#N/A	#N/A	#N/A
CNAG_01492	_T[Phospho (STY)]PLDEKPVPFSRPSTPTPAHDQLAFVGLGEMGK_	-	hypothetical protein	#N/A	1.05778	1.12732	#N/A	#N/A	#N/A
CNAG_01492	_TPLDEKPVPFSRPST[Phospho (STY)]PTPAHDQLAFVGLGEMGK_	-	hypothetical protein	#N/A	1.04967	1.13966	#N/A	#N/A	#N/A
CNAG_01492	_PST[Phospho (STY)]PTPAHDQLAFVGLGEMGK_	-	hypothetical protein	#N/A	1.44173	1.2039	#N/A	#N/A	#N/A
CNAG_01492	_PST[Phospho (STY)]PTPAHDQLAFVGLGEMGKR_	-	hypothetical protein	#N/A	1.11097	1.24872	#N/A	#N/A	#N/A
CNAG_01492	_AHFNENPVT[Phospho (STY)]PPPEK_	-	hypothetical protein	#N/A	1.23554	1.26343	#N/A	#N/A	#N/A
CNAG_01492	_TPLDEKPVPFS[Phospho (STY)]RPS[Phospho (STY)]TPTPAHDQLAFVGLGEM[Oxidation (M)]GK_	-	hypothetical protein	#N/A	#N/A	1.41781	#N/A	#N/A	#N/A
CNAG_01492	_T[Phospho (STY)]PLDEKPVPFSR_	-	hypothetical protein	#N/A	3.84057	#N/A	#N/A	#N/A	#N/A
CNAG_01492	_GRST[Phospho (STY)]IFVDTSTVYPTTAGR_	-	hypothetical protein	7.11776	7.42679	#N/A	#N/A	#N/A	#N/A
CNAG_01492	_NGVT[Phospho (STY)]EDMYEVK_	-	hypothetical protein	#N/A	#N/A	#N/A	5.5921	#N/A	#N/A
CNAG_01492	_S[Phospho (STY)]FLSC[Carbamidomethyl (C)]PVFGVPR_	-	hypothetical protein	#N/A	#N/A	#N/A	4.63226	4.15129	4.30576
CNAG_01492	_TEGDTFASSGT[Phospho (STY)]RTPLDEKPVPFSR_	-	hypothetical protein	#N/A	#N/A	#N/A	#N/A	#N/A	5.52895
CNAG_01496	_LPLATLVTASLPPSSPKS[Phospho (STY)]EGSKPAILSEGK_	PPT1	protein phosphatase 5	#N/A	6.32606	5.97691	#N/A	#N/A	#N/A
CNAG_01496	_LPLATLVTASLPPSSPKSEGS[Phospho (STY)]KPAILSEGK_	PPT1	protein phosphatase 5	#N/A	3.79685	#N/A	#N/A	#N/A	#N/A
CNAG_01496	_LPLATLVTASLPPSSPKSEGSKPAILS[Phospho (STY)]EGK_	PPT1	protein phosphatase 5	#N/A	4.30855	#N/A	#N/A	#N/A	#N/A
CNAG_01508	_RIS[Phospho (STY)]S[Phospho (STY)]RGS[Phospho (STY)]YT[Phospho (STY)]PSIAPSIAGTSTGSVLGR_	-	hypothetical protein	#N/A	#N/A	#N/A	#N/A	2.3337	#N/A
CNAG_01510	_HKVVET[Phospho (STY)]QTITDIMDSSYAISSSLPGDYAVTSVSDK_	-	hypothetical protein	5.88843	6.08342	5.88054	#N/A	-9.67343	#N/A
CNAG_01522	_FHSQFSHGQITT[Phospho (STY)]FKPYSR_	-	phenylalanine-tRNA ligase	#N/A	#N/A	#N/A	#N/A	5.24737	#N/A
CNAG_01526	_GHPAFAS[Phospho (STY)]S[Phospho (STY)]PNRPSPLSASFGAVGSGLAAGSVPGPLSLK_	-	cleavage and polyadenylation specificity factor subunit 4	#N/A	#N/A	1.01672	#N/A	#N/A	#N/A
CNAG_01526	_GHPAFASSPNRPSPLSAS[Phospho (STY)]FGAVGS[Phospho (STY)]GLAAGSVPGPLSLK_	-	cleavage and polyadenylation specificity factor subunit 4	#N/A	#N/A	1.03423	#N/A	#N/A	#N/A
CNAG_01526	_GHPAFASSPNRPS[Phospho (STY)]PLSAS[Phospho (STY)]FGAVGSGLAAGSVPGPLSLK_	-	cleavage and polyadenylation specificity factor subunit 4	#N/A	#N/A	1.04318	#N/A	#N/A	#N/A
CNAG_01526	_GHPAFASSPNRPS[Phospho (STY)]PLS[Phospho (STY)]ASFGAVGSGLAAGSVPGPLSLK_	-	cleavage and polyadenylation specificity factor subunit 4	#N/A	#N/A	1.04318	#N/A	#N/A	#N/A
CNAG_01526	_TIKPEAVFEDDDDHGEEFLPSSLS[Phospho (STY)]DLLTPQER_	-	cleavage and polyadenylation specificity factor subunit 4	#N/A	#N/A	1.06482	#N/A	#N/A	#N/A
CNAG_01526	_TIKPEAVFEDDDDHGEEFLPS[Phospho (STY)]SLSDLLTPQER_	-	cleavage and polyadenylation specificity factor subunit 4	#N/A	#N/A	1.08075	#N/A	#N/A	#N/A
CNAG_01526	_TIKPEAVFEDDDDHGEEFLPSS[Phospho (STY)]LSDLLTPQER_	-	cleavage and polyadenylation specificity factor subunit 4	#N/A	#N/A	1.08075	#N/A	#N/A	#N/A
CNAG_01526	_RDSQDS[Phospho (STY)]SYSPSLAAFAAQAPAWGGER_	-	cleavage and polyadenylation specificity factor subunit 4	#N/A	1.07972	1.11734	#N/A	#N/A	#N/A
CNAG_01526	_RDSQDSSY[Phospho (STY)]SPSLAAFAAQAPAWGGER_	-	cleavage and polyadenylation specificity factor subunit 4	#N/A	1.07972	1.11734	#N/A	#N/A	#N/A
CNAG_01526	_GHPAFASS[Phospho (STY)]PNRPS[Phospho (STY)]PLSASFGAVGSGLAAGSVPGPLSLK_	-	cleavage and polyadenylation specificity factor subunit 4	#N/A	#N/A	1.12287	#N/A	1.5089	#N/A
CNAG_01526	_GHPAFASSPNRPSPLS[Phospho (STY)]AS[Phospho (STY)]FGAVGSGLAAGSVPGPLSLK_	-	cleavage and polyadenylation specificity factor subunit 4	#N/A	#N/A	1.14231	#N/A	1.44174	#N/A
CNAG_01526	_RDS[Phospho (STY)]QDSSYSPSLAAFAAQAPAWGGER_	-	cleavage and polyadenylation specificity factor subunit 4	#N/A	1.12216	1.16606	#N/A	#N/A	#N/A
CNAG_01526	_SALSSSIQS[Phospho (STY)]NPTR_	-	cleavage and polyadenylation specificity factor subunit 4	1.05494	#N/A	1.24091	#N/A	#N/A	#N/A
CNAG_01526	_SALSSS[Phospho (STY)]IQS[Phospho (STY)]NPTR_	-	cleavage and polyadenylation specificity factor subunit 4	#N/A	#N/A	1.27058	#N/A	#N/A	#N/A
CNAG_01526	_SALSSSIQSNPT[Phospho (STY)]R_	-	cleavage and polyadenylation specificity factor subunit 4	1.1107	#N/A	1.30139	#N/A	1.11257	#N/A
CNAG_01526	_ALIEHAPGQS[Phospho (STY)]LPGGLANALSR_	-	cleavage and polyadenylation specificity factor subunit 4	#N/A	#N/A	1.30618	#N/A	#N/A	#N/A
CNAG_01526	_RDS[Phospho (STY)]QDSS[Phospho (STY)]YSPSLAAFAAQAPAWGGER_	-	cleavage and polyadenylation specificity factor subunit 4	1.42638	1.38604	1.54341	#N/A	#N/A	#N/A
CNAG_01526	_SALSS[Phospho (STY)]S[Phospho (STY)]IQSNPTR_	-	cleavage and polyadenylation specificity factor subunit 4	1.34942	1.29906	1.55858	#N/A	1.28943	#N/A
CNAG_01526	_RDSQDSS[Phospho (STY)]YS[Phospho (STY)]PSLAAFAAQAPAWGGER_	-	cleavage and polyadenylation specificity factor subunit 4	1.37809	1.3517	1.56	#N/A	#N/A	#N/A
CNAG_01526	_RDSQDSSY[Phospho (STY)]SPS[Phospho (STY)]LAAFAAQAPAWGGER_	-	cleavage and polyadenylation specificity factor subunit 4	1.39775	1.39119	1.59628	#N/A	#N/A	#N/A
CNAG_01526	_RDS[Phospho (STY)]QDSSYS[Phospho (STY)]PSLAAFAAQAPAWGGER_	-	cleavage and polyadenylation specificity factor subunit 4	1.39777	1.3912	1.5963	#N/A	#N/A	#N/A
CNAG_01526	_RDS[Phospho (STY)]QDS[Phospho (STY)]SYSPSLAAFAAQAPAWGGER_	-	cleavage and polyadenylation specificity factor subunit 4	1.39778	1.3912	1.5963	#N/A	#N/A	#N/A
CNAG_01526	_DSQDSSYS[Phospho (STY)]PSLAAFAAQAPAWGGER_	-	cleavage and polyadenylation specificity factor subunit 4	1.5351	1.15985	1.98706	#N/A	#N/A	#N/A
CNAG_01526	_RDS[Phospho (STY)]QDS[Phospho (STY)]SY[Phospho (STY)]SPSLAAFAAQAPAWGGER_	-	cleavage and polyadenylation specificity factor subunit 4	#N/A	#N/A	1.98755	#N/A	#N/A	#N/A
CNAG_01526	_RDSQDSSY[Phospho (STY)]S[Phospho (STY)]PS[Phospho (STY)]LAAFAAQAPAWGGER_	-	cleavage and polyadenylation specificity factor subunit 4	#N/A	#N/A	1.99038	#N/A	1.35935	#N/A
CNAG_01526	_DSQDSSY[Phospho (STY)]SPSLAAFAAQAPAWGGER_	-	cleavage and polyadenylation specificity factor subunit 4	1.75099	1.32977	2.18977	#N/A	#N/A	#N/A
CNAG_01526	_DSQDSSYSPS[Phospho (STY)]LAAFAAQAPAWGGER_	-	cleavage and polyadenylation specificity factor subunit 4	2.03471	1.6135	2.47349	#N/A	#N/A	#N/A
CNAG_01526	_S[Phospho (STY)]PGSAS[Phospho (STY)]PTS[Phospho (STY)]PIR_	-	cleavage and polyadenylation specificity factor subunit 4	5.51845	#N/A	4.66872	#N/A	#N/A	#N/A
CNAG_01526	_LAQS[Phospho (STY)]AGPTMGQK_	-	cleavage and polyadenylation specificity factor subunit 4	4.30505	3.9971	4.89971	#N/A	#N/A	#N/A
CNAG_01526	_TSLLTQQRSPGS[Phospho (STY)]AS[Phospho (STY)]PTS[Phospho (STY)]PIR_	-	cleavage and polyadenylation specificity factor subunit 4	#N/A	#N/A	5.60386	#N/A	#N/A	#N/A
CNAG_01526	_TIKPEAVFEDDDDHGEEFLPSSLS[Phospho (STY)]DLLT[Phospho (STY)]PQER_	-	cleavage and polyadenylation specificity factor subunit 4	#N/A	5.17347	5.7678	#N/A	1.01465	#N/A
CNAG_01526	_TSLLTQQRS[Phospho (STY)]PGSASPT[Phospho (STY)]S[Phospho (STY)]PIR_	-	cleavage and polyadenylation specificity factor subunit 4	#N/A	6.27167	6.01773	#N/A	#N/A	#N/A
CNAG_01526	_TIKPEAVFEDDDDHGEEFLPS[Phospho (STY)]SLSDLLT[Phospho (STY)]PQER_	-	cleavage and polyadenylation specificity factor subunit 4	#N/A	#N/A	6.38114	#N/A	1.03788	#N/A
CNAG_01526	_STS[Phospho (STY)]SLAVVNSGGGGR_	-	cleavage and polyadenylation specificity factor subunit 4	6.68176	#N/A	6.65759	#N/A	#N/A	#N/A
CNAG_01526	_S[Phospho (STY)]TSSLAVVNSGGGGR_	-	cleavage and polyadenylation specificity factor subunit 4	6.4431	#N/A	6.69376	#N/A	#N/A	#N/A
CNAG_01526	_YRPGAATS[Phospho (STY)]IGKS[Phospho (STY)]FNNDNWR_	-	cleavage and polyadenylation specificity factor subunit 4	#N/A	6.66063	6.8407	#N/A	#N/A	#N/A
CNAG_01526	_LAEHEAEGSEDGDGGAITPNGAGVS[Phospho (STY)]HSKR_	-	cleavage and polyadenylation specificity factor subunit 4	6.8918	6.47631	6.90843	#N/A	#N/A	#N/A
CNAG_01526	_SPGSAS[Phospho (STY)]PT[Phospho (STY)]SPIR_	-	cleavage and polyadenylation specificity factor subunit 4	8.44872	8.72694	8.57574	#N/A	#N/A	#N/A
CNAG_01526	_SPGSASPTS[Phospho (STY)]PIR_	-	cleavage and polyadenylation specificity factor subunit 4	#N/A	1.06881	#N/A	#N/A	#N/A	#N/A
CNAG_01526	_TSLLTQQRS[Phospho (STY)]PGSAS[Phospho (STY)]PTS[Phospho (STY)]PIR_	-	cleavage and polyadenylation specificity factor subunit 4	#N/A	6.43263	#N/A	#N/A	#N/A	#N/A
CNAG_01526	_GHPAFASSPNRPSPLSASFGAVGS[Phospho (STY)]GLAAGSVPGPLSLK_	-	cleavage and polyadenylation specificity factor subunit 4	1.59992	#N/A	#N/A	#N/A	-1.28698	-1.70648
CNAG_01526	_LAEHEAEGSEDGDGGAITPNGAGVS[Phospho (STY)]HS[Phospho (STY)]KR_	-	cleavage and polyadenylation specificity factor subunit 4	#N/A	#N/A	#N/A	#N/A	#N/A	4.97181
CNAG_01530	_SSLSAQPQQY[Phospho (STY)]QNTRSDIK_	MGA2	suppressor protein SPT23	#N/A	#N/A	5.30105	5.16449	5.58031	#N/A
CNAG_01530	_LAPLHS[Phospho (STY)]PIPPPSLHPLIPK_	MGA2	suppressor protein SPT23	#N/A	4.52518	#N/A	#N/A	#N/A	#N/A
CNAG_01530	_ETGAVPAVT[Phospho (STY)]VGGVGERGSQK_	MGA2	suppressor protein SPT23	#N/A	#N/A	#N/A	6.54086	6.35981	6.54807
CNAG_01530	_STIESSPEAVGGQNS[Phospho (STY)]DPR_	MGA2	suppressor protein SPT23	#N/A	#N/A	#N/A	#N/A	#N/A	2.24171
CNAG_01531	_MNSGLSRPPAALPMT[Phospho (STY)]PPKK_	SRS2	DNA helicase II/ATP-dependent DNA helicase PcrA	#N/A	5.10856	4.6547	#N/A	#N/A	#N/A
CNAG_01531	_TNERHDGVIELLSS[Phospho (STY)]DEEENSVKPDIK_	SRS2	DNA helicase II/ATP-dependent DNA helicase PcrA	#N/A	5.69618	6.1114	#N/A	#N/A	#N/A
CNAG_01531	_MNSGLSRPPAALPMT[Phospho (STY)]PPK_	SRS2	DNA helicase II/ATP-dependent DNA helicase PcrA	#N/A	6.18968	#N/A	5.93373	6.28157	6.63018
CNAG_01532	_TSNPQSTVTSADAEQSAGSGPGMT[Phospho (STY)]DRADVSTSPK_	INP52	phosphatidylinositol phosphate phosphatase	#N/A	#N/A	4.44088	#N/A	#N/A	#N/A
CNAG_01532	_PSQTFLHS[Phospho (STY)]PTKPTTR_	INP52	phosphatidylinositol phosphate phosphatase	#N/A	#N/A	4.90794	#N/A	#N/A	#N/A
CNAG_01532	_VTPAPSTKISPS[Phospho (STY)]K_	INP52	phosphatidylinositol phosphate phosphatase	#N/A	#N/A	5.72272	#N/A	#N/A	#N/A
CNAG_01532	_S[Phospho (STY)]ISTLQPPSTSASSSLR_	INP52	phosphatidylinositol phosphate phosphatase	#N/A	#N/A	#N/A	7.21291	7.14981	6.56468
CNAG_01533	_RLS[Phospho (STY)]AGPGVLDGLMR_	-	rho GTPase activator	#N/A	#N/A	1.14456	#N/A	#N/A	#N/A
CNAG_01533	_VDVAVSPT[Phospho (STY)]S[Phospho (STY)]PLPDFEAK_	-	rho GTPase activator	#N/A	#N/A	2.98196	#N/A	#N/A	#N/A
CNAG_01533	_LPSRPSIT[Phospho (STY)]K_	-	rho GTPase activator	6.69619	#N/A	#N/A	#N/A	#N/A	-1.06817
CNAG_01533	_ITES[Phospho (STY)]ASIADLRPYSNETDR_	-	rho GTPase activator	#N/A	#N/A	#N/A	5.55613	#N/A	6.30882
CNAG_01533	_ITESAS[Phospho (STY)]IADLRPYSNETDR_	-	rho GTPase activator	#N/A	#N/A	#N/A	5.29931	5.41475	5.70587
CNAG_01533	_NQS[Phospho (STY)]PGTTPTR_	-	rho GTPase activator	#N/A	#N/A	#N/A	2.1988	3.54459	4.42961
CNAG_01533	_S[Phospho (STY)]ESTQSLASQATGTSQYR_	-	rho GTPase activator	#N/A	#N/A	#N/A	#N/A	#N/A	1.58409
CNAG_01533	_SES[Phospho (STY)]TQSLASQATGTSQYR_	-	rho GTPase activator	#N/A	#N/A	#N/A	#N/A	#N/A	1.77992
CNAG_01533	_SESTQS[Phospho (STY)]LASQATGTSQYR_	-	rho GTPase activator	#N/A	#N/A	#N/A	#N/A	#N/A	1.59145
CNAG_01533	_SESTQSLAS[Phospho (STY)]QATGTSQYR_	-	rho GTPase activator	#N/A	#N/A	#N/A	#N/A	#N/A	1.14904
CNAG_01533	_SSLRPASVAS[Phospho (STY)]YAEVAR_	-	rho GTPase activator	#N/A	#N/A	#N/A	#N/A	1.20465	#N/A
CNAG_01535	_SMS[Phospho (STY)]MVHNGSSETVDDDALLAELGYK_	-	Amino acid permease	#N/A	7.34146	6.68766	#N/A	#N/A	#N/A
CNAG_01535	_S[Phospho (STY)]MSMVHNGSSETVDDDALLAELGYK_	-	Amino acid permease	#N/A	8.87219	7.43857	#N/A	#N/A	#N/A
CNAG_01541	_DGPS[Phospho (STY)]QLINR_	-	hypothetical protein	5.31929	#N/A	#N/A	#N/A	#N/A	#N/A
CNAG_01543	_RALQNSASVASSSPAGSS[Phospho (STY)]PAGS[Phospho (STY)]AR_	-	AP-3 complex subunit beta	#N/A	#N/A	#N/A	1.4056	1.42783	1.60126
CNAG_01547	_VWSAGWDDKVTAIEGSQFTS[Phospho (STY)]SPIPTK_	AIP1	wd-repeat protein	#N/A	#N/A	#N/A	#N/A	#N/A	1.31652
CNAG_01549	_T[Phospho (STY)]YEQLQR_	-	splicing factor 3a subunit 3	5.72728	5.75734	5.87542	#N/A	#N/A	#N/A
CNAG_01552	_VSPLS[Phospho (STY)]FRPGSSAGTSQFSESPYGGGMGSGYTR_	-	blocked early in transport 1	2.04768	2.22287	1.95273	#N/A	#N/A	#N/A
CNAG_01553	_ILS[Phospho (STY)]TKVEITLVKPK_	-	CORD and CS domain-containing protein	#N/A	#N/A	3.38621	#N/A	#N/A	#N/A
CNAG_01553	_LSNTATSSPSVVPS[Phospho (STY)]ALTAVTPSQHNTEQKEAK_	-	CORD and CS domain-containing protein	#N/A	#N/A	#N/A	6.83608	6.4896	#N/A
CNAG_01555	_SFIC[Carbamidomethyl (C)]S[Phospho (STY)]NSPSSSR_	-	hypothetical protein	7.21043	6.37651	7.06634	#N/A	#N/A	#N/A
CNAG_01555	_SHLSSSISENIDAILHS[Phospho (STY)]PEEEFRK_	-	hypothetical protein	#N/A	5.413	#N/A	#N/A	#N/A	#N/A
CNAG_01556	_NQT[Phospho (STY)]LDESDDGSSAAAELADR_	-	cytoplasmic protein	5.91786	6.67194	6.38847	#N/A	#N/A	#N/A
CNAG_01556	_NQT[Phospho (STY)]LDES[Phospho (STY)]DDGS[Phospho (STY)]SAAAELADR_	-	cytoplasmic protein	#N/A	#N/A	#N/A	#N/A	5.67013	7.62521
CNAG_01557	_MHDT[Phospho (STY)]DSEEEIREAFK_	CAM1	Calmodulin	3.54913	3.25871	4.18251	#N/A	#N/A	#N/A
CNAG_01557	_KMHDTDS[Phospho (STY)]EEEIR_	CAM1	Calmodulin	#N/A	#N/A	5.03249	#N/A	#N/A	#N/A
CNAG_01557	_MHDT[Phospho (STY)]DS[Phospho (STY)]EEEIREAFK_	CAM1	Calmodulin	5.89435	6.37601	7.10126	#N/A	#N/A	#N/A
CNAG_01557	_MHDTDS[Phospho (STY)]EEEIREAFK_	CAM1	Calmodulin	#N/A	#N/A	#N/A	#N/A	1.5883	1.41709
CNAG_01558	_LPGWSPT[Phospho (STY)]DIFVNEKR_	-	chlorophyll synthesis pathway protein BchC	#N/A	#N/A	#N/A	5.91062	6.07297	#N/A
CNAG_01559	_FDAAT[Phospho (STY)]RLDPPSESLPSNAEYYAERDK_	-	hypothetical protein	#N/A	7.23135	7.47112	#N/A	#N/A	-1.13933
CNAG_01559	_AFASPS[Phospho (STY)]KSINFEALQELYSSR_	-	hypothetical protein	#N/A	#N/A	#N/A	#N/A	#N/A	4.53912
CNAG_01564	_TIPTANTLQNT[Phospho (STY)]IK_	-	nucleolar protein 12	#N/A	5.96828	6.66707	#N/A	#N/A	#N/A
CNAG_01565	_TQPVFPPSIQDLSIQSDSTPPPPS[Phospho (STY)]PPDLHSLTK_	-	biotin-[acetyl-CoA-carboxylase] ligase	#N/A	5.63246	6.17477	#N/A	#N/A	#N/A
CNAG_01565	_TQPVFPPSIQDLSIQSDSTPPPPSPPDLHSLT[Phospho (STY)]K_	-	biotin-[acetyl-CoA-carboxylase] ligase	5.25909	6.05012	6.23704	#N/A	#N/A	#N/A
CNAG_01565	_AQTHNQS[Phospho (STY)]PFVDLQPDGNSFDLMSGLIK_	-	biotin-[acetyl-CoA-carboxylase] ligase	#N/A	9.03951	#N/A	#N/A	#N/A	#N/A
CNAG_01566	_EGQISPIVDVGFEMGMDADGGKEEAY[Phospho (STY)]K_	SPC98	gamma-tubulin complex component 3	#N/A	#N/A	#N/A	-6.68912	-5.62717	1.10687
CNAG_01567	_LT[Phospho (STY)]QWLC[Carbamidomethyl (C)]YSLVDAIESEAGWKVDK_	-	hypothetical protein	#N/A	4.99263	#N/A	-1.57102	#N/A	-1.76617
CNAG_01572	_AALSLGQPPIFGS[Phospho (STY)]AK_	CDC25	tyrosine phosphatase, variant	#N/A	#N/A	5.09842	#N/A	#N/A	#N/A
CNAG_01572	_SLVNGPPAS[Phospho (STY)]PSSGSPSAKR_	CDC25	tyrosine phosphatase, variant	#N/A	#N/A	#N/A	#N/A	#N/A	4.76232
CNAG_01573	_EQPGPTTKFSPVT[Phospho (STY)]AAPMSTTVVR_	RIF2	hypothetical protein	#N/A	6.87486	6.62904	#N/A	#N/A	#N/A
CNAG_01573	_IDESEGPDEDAVS[Phospho (STY)]HGGSSPIKPGR_	RIF2	hypothetical protein	#N/A	#N/A	#N/A	#N/A	5.51397	6.20303
CNAG_01573	_TNC[Carbamidomethyl (C)]STTVIGHNLNVRC[Carbamidomethyl (C)]LLS[Phospho (STY)]VEAIVQKEQPGPTTK_	RIF2	hypothetical protein	#N/A	#N/A	#N/A	#N/A	#N/A	1.25946
CNAG_01574	_SRSDPIPPS[Phospho (STY)]PK_	-	hypothetical protein	#N/A	#N/A	2.15189	#N/A	#N/A	#N/A
CNAG_01574	_QKDQGSFSPQVNPDHGSVHITSQLPPALS[Phospho (STY)]PHVR_	-	hypothetical protein	#N/A	2.9776	4.91673	#N/A	#N/A	#N/A
CNAG_01574	_AS[Phospho (STY)]PIFGAIGTPGS[Phospho (STY)]QGSTIYPHGASIDTLR_	-	hypothetical protein	#N/A	6.80287	6.75459	#N/A	#N/A	#N/A
CNAG_01574	_AS[Phospho (STY)]PIFGAIGTPGSQGSTIY[Phospho (STY)]PHGASIDTLR_	-	hypothetical protein	#N/A	4.2142	#N/A	#N/A	#N/A	#N/A
CNAG_01574	_ASPIFGAIGTPGSQGSTIYPHGASIDT[Phospho (STY)]LR_	-	hypothetical protein	6.0576	#N/A	#N/A	-9.7757	#N/A	#N/A
CNAG_01576	_ESVNPSS[Phospho (STY)]FPIHHPGIFGGS[Phospho (STY)]PVK_	-	hypothetical protein	6.53489	#N/A	6.13717	#N/A	#N/A	#N/A
CNAG_01576	_KYFDS[Phospho (STY)]GDYM[Oxidation (M)]M[Oxidation (M)]SK_	-	hypothetical protein	#N/A	#N/A	#N/A	4.63053	4.56359	3.7753
CNAG_01576	_KYFDS[Phospho (STY)]GDYM[Oxidation (M)]MSK_	-	hypothetical protein	#N/A	#N/A	#N/A	4.23221	4.42125	#N/A
CNAG_01576	_KYFDS[Phospho (STY)]GDYMM[Oxidation (M)]SK_	-	hypothetical protein	#N/A	#N/A	#N/A	#N/A	6.94806	#N/A
CNAG_01577	_S[Phospho (STY)]LTAFATGSK_	-	glutamate dehydrogenase (NADP)	#N/A	3.9169	#N/A	#N/A	#N/A	#N/A
CNAG_01578	_QLQNSNRAS[Phospho (STY)]PNTR_	-	hypothetical protein	4.05901	#N/A	#N/A	#N/A	#N/A	#N/A
CNAG_01578	_QLQNSNRASPNT[Phospho (STY)]R_	-	hypothetical protein	6.65818	#N/A	#N/A	#N/A	#N/A	#N/A
CNAG_01579	_TTPRS[Phospho (STY)]PS[Phospho (STY)]PDPSSLSLR_	-	vacuolar membrane-associated protein IML1	#N/A	5.18499	4.62151	#N/A	#N/A	#N/A
CNAG_01579	_TTPRS[Phospho (STY)]PSPDPSSLSLR_	-	vacuolar membrane-associated protein IML1	#N/A	#N/A	5.55184	#N/A	#N/A	#N/A
CNAG_01579	_GGPNPKPIIT[Phospho (STY)]PSTPSPSR_	-	vacuolar membrane-associated protein IML1	#N/A	#N/A	6.03604	#N/A	#N/A	#N/A
CNAG_01579	_PIITPS[Phospho (STY)]TPSPSR_	-	vacuolar membrane-associated protein IML1	#N/A	#N/A	6.61462	#N/A	#N/A	#N/A
CNAG_01579	_S[Phospho (STY)]ISPVPPLPPTR_	-	vacuolar membrane-associated protein IML1	#N/A	#N/A	#N/A	#N/A	1.45138	#N/A
CNAG_01580	_STSLLSPVS[Phospho (STY)]NGEFPLSSHGSAR_	SCP1	sterol regulatory element-binding protein cleavage-activating protein	#N/A	#N/A	5.14628	#N/A	#N/A	#N/A
CNAG_01580	_GQASGGGS[Phospho (STY)]TNGIVSMR_	SCP1	sterol regulatory element-binding protein cleavage-activating protein	#N/A	#N/A	#N/A	5.38699	5.67595	5.41066
[truncated: 6,216 more rows]

## Sheet: Cac1_ko_m_up
Locus_tag	site	Gene name	Function	log2FC	padj		Locus_tag	Gene name	Function	number
CNAG_00377	_KHPNDS[Phospho (STY)]ISDASS[Phospho (STY)]DIVC[Carbamidomethyl (C)]SPPK_	TOP2	DNA topoisomerase II, variant	11.9754	0.0128273		CNAG_01526	-	cleavage and polyadenylation specificity factor subunit 4	18
CNAG_01795	_SS[Phospho (STY)]IAGEK_	-	hypothetical protein	11.527	0.0114914		CNAG_07491	-	glutaredoxin	17
CNAG_06583	_EATMPLS[Phospho (STY)]GPSR_	-	hypothetical protein	11.4791	0		CNAG_05745	-	cytoplasmic protein	16
CNAG_02220	_ASGVQAPSLASGRHESDKPPAPFVY[Phospho (STY)]TPFSLFTK_	-	hypothetical protein	11.4626	0.044683		CNAG_02877	FZC51	hypothetical protein	15
CNAG_00248	_LSS[Phospho (STY)]QQAAASSPSGSPQGQTTEEEATMIR_	VPS36	ESCRT-II complex subunit VPS36	11.3811	0.00794771		CNAG_03836	-	hypothetical protein, variant	14
CNAG_05038	_TPPTAYASQLAT[Phospho (STY)]QVMPVSVSRPPAPAYLHR_	-	hypothetical protein	11.2376	0.0145928		CNAG_00039	ZFC6	hypothetical protein	14
CNAG_05148	_ARAQVLSLDEVS[Phospho (STY)]PGIVR_	CXT1	beta-1,2-xylosyltransferase 1	11.1762	0.014604		CNAG_03727	-	hypothetical protein	12
CNAG_05685	_NHPEVY[Phospho (STY)]SMDGVGYVLAGK_	-	neutral amino acid transporter	11.0884	0.0173761		CNAG_04803	SEC31	protein transporter sec31	12
CNAG_02488	_ASS[Phospho (STY)]PPYHIINGDDNGKDEGGGFAKPLSITDK_	-	methionyl-tRNA formyltransferase	10.853	0.0127182		CNAG_02168	-	Glucoamylase	11
CNAG_00248	_LS[Phospho (STY)]SQQAAASSPSGSPQGQTTEEEATMIR_	VPS36	ESCRT-II complex subunit VPS36	10.6755	0.0125735		CNAG_02568	-	UBA/TS-N domain-containing protein	11
CNAG_03841	_FFVQSSPSKGS[Phospho (STY)]ASDSPLPSPVTSAALNPPSR_	-	hypothetical protein	10.6675	0.00948624		CNAG_04478	-	hypothetical protein	11
CNAG_06109	_DKSLGTDPTSTGVSGTTSGT[Phospho (STY)]GVGPSGGAGGHYGK_	-	hypothetical protein, variant	10.4323	0.0112597		CNAG_06192	-	hypothetical protein	11
CNAG_02293	_KSGAELSQADYPFPELAT[Phospho (STY)]SGNATTSNAR_	-	hypothetical protein	10.3834	0.0135551		CNAG_04198	-	hypothetical protein	11
CNAG_06616	_ERHS[Phospho (STY)]EGMVSR_	-	hypothetical protein	10.3353	0.0170035		CNAG_04361	-	hypothetical protein	11
CNAG_07903	_ALPT[Phospho (STY)]PPVSSNDHSPSR_	ROM20	Predicted Rho guanine nucleotide exchange factor (Rho GEF)	10.3294	0.0128478		CNAG_07631	-	hypothetical protein	11
CNAG_02488	_ASSPPY[Phospho (STY)]HIINGDDNGKDEGGGFAKPLSITDK_	-	methionyl-tRNA formyltransferase	10.2897	0.010803		CNAG_07571	-	hypothetical protein	11
CNAG_00056	_RGLSPNFDS[Phospho (STY)]VPS[Phospho (STY)]PQQR_	-	hypothetical protein	10.2336	0.00975472		CNAG_03841	-	hypothetical protein	10
CNAG_06664	_FSKIES[Phospho (STY)]LK_	-	sorting nexin Mvp1	10.197	0.0112154		CNAG_04321	-	hypothetical protein	10
CNAG_03322	_SLYLS[Phospho (STY)]PAYIK_	UXS1	UDP-glucuronate decarboxylase	10.1594	0.0159455		CNAG_05250	-	telomere maintenance protein	10
CNAG_05153	_LGPMT[Phospho (STY)]SPPRGSASATK_	GAT5	hypothetical protein	10.1021	0.00913295		CNAG_01149	-	hypothetical protein	10
CNAG_00588	_TWDINPGSGS[Phospho (STY)]VILHGTNFALDAGTGSDNNEGVK_	-	hypothetical protein	9.90361	0.0146174		CNAG_06577	-	hypothetical protein	10
CNAG_01142	_AGITEEVDGS[Phospho (STY)]EKDDGR_	-	endoplasmic reticulum protein	9.83915	0.0242579		CNAG_02458	-	GTPase activating protein	10
CNAG_00777	_QDGNFRLPPLS[Phospho (STY)]FNEASQDPNLPR_	-	CCR4-NOT transcriptional complex subunit CAF120	9.81881	0.0114378		CNAG_00148	-	hypothetical protein	10
CNAG_01334	_ATEALIDGQSMAADSGETSLQSVVNHS[Phospho (STY)]AAGEAR_	-	hypothetical protein	9.78297	0.00877778		CNAG_04090	ATF1	activating transcription factor	10
CNAG_02201	_AASGT[Phospho (STY)]GHFAKPPPVPSASK_	-	hypothetical protein	9.77095	0		CNAG_03655	-	hypothetical protein, variant	9
CNAG_00130	_PMPSESPMYSPLLAS[Phospho (STY)]IR_	RCK2	CAMK/CAMK1/CAMK1-RCK protein kinase	9.75728	0.0218106		CNAG_02432	-	hypothetical protein, variant	9
CNAG_04327	_NLIGQGGQNLRDLIASAGGPS[Phospho (STY)]EGYKQAGLVT[Phospho (STY)]FPK_	-	hypothetical protein	9.70769	0.0114128		CNAG_01062	PSK201	CAMK/CAMKL/PASK protein kinase	9
CNAG_00774	_NAS[Phospho (STY)]GAFQGIAR_	-	phosphoglycerate dehydrogenase	9.65075	0.0147162		CNAG_03818	SSK1	osomolarity two-component system, response regulator SSK1	9
CNAG_04353	_SPMSNDGSLS[Phospho (STY)]PPAGAQDILEPMDSQK_	CLR1	hypothetical protein, variant	9.63775	0.0227348		PTP2	PTP2	#N/A	9
CNAG_04321	_SSQVTPVS[Phospho (STY)]K_	-	hypothetical protein	9.6213	0.0111207		VTS1	VTS1	#N/A	9
CNAG_07359	_LGLGVDDTY[Phospho (STY)]MVETGEEGEEGQTFK_	IRK1	Atypical/ABC1/ABC1-C protein kinase	9.54473	0.0141511		CNAG_02994	-	hypothetical protein, variant	8
CNAG_03463	_KVSGMDRPSSPT[Phospho (STY)]K_	-	hypothetical protein	9.52335	0.0164604		CNAG_04151	-	oxysterol-binding protein	8
CNAG_04833	_GGTLT[Phospho (STY)]PAR_	TEP1	hypothetical protein	9.48782	0.0294154		CNAG_06158	-	hypothetical protein	8
CNAG_03237	_AANSLPTTADIY[Phospho (STY)]AAK_	-	hypothetical protein	9.43756	0.0131543		CNAG_06661	-	hypothetical protein	8
CNAG_07491	_RALSLPSITM[Oxidation (M)]PFNNY[Phospho (STY)]GNNNAPLLPLTR_	-	glutaredoxin	9.42168	0.0154852		CNAG_01130	-	hypothetical protein	8
CNAG_00095	_LAT[Phospho (STY)]REATLLLLSIQASANSTASTDSK_	-	hypothetical protein	9.42128	0.0195715		CNAG_01631	-	mRNA cap guanine-N7 methyltransferase	8
CNAG_04487	_NQGGLAVSGRPS[Phospho (STY)]SGPR_	-	transcription regulator	9.41925	0.0154319		CNAG_04150	-	hypothetical protein	8
CNAG_05591	_S[Phospho (STY)]QSQSTYYR_	-	hypothetical protein, variant	9.41727	0.0112965		CNAG_07846	-	ran-binding protein 3	8
CNAG_01833	_[Acetyl (Protein N-term)]SSTTIPPAAVTANSNTLNSALAAEQISS[Phospho (STY)]PAS[Phospho (STY)]PVGKPVDEKK_	-	translation initiation factor 4E	9.33347	0.00712381		CNAG_03378	CLR2	DNA binding protein, putative	8
CNAG_07583	_LSSGGS[Phospho (STY)]KASPPAR_	-	hypothetical protein	9.33068	0.0113136		CNAG_00130	RCK2	CAMK/CAMK1/CAMK1-RCK protein kinase	8
CNAG_02168	_SASALGVHDNPTS[Phospho (STY)]PPTMSK_	-	Glucoamylase	9.33044	0.0195132		CNAG_01454	STE12alpha	transcription factor STE12	8
CHS8	_YSLPTQSLSPFNGSPAS[Phospho (STY)]APAPAPYTMGSPSHSNAR_	#N/A	#N/A	9.29686	0.0109248		CNAG_00106	TCO5	Two-component-like sensor kinase	8
CNAG_01916	_GSES[Phospho (STY)]NSFLTAAER_	MSH6	DNA mismatch repair protein msh6	9.29571	0		CNAG_00777	-	CCR4-NOT transcriptional complex subunit CAF120	7
CNAG_01155	_RPS[Phospho (STY)]VNQQYSSYMSQY[Phospho (STY)]PQQGVQSLSRR_	GUT1	glycerol kinase	9.24597	0.0111133		CNAG_03463	-	hypothetical protein	7
CNAG_03237	_AANSLPT[Phospho (STY)]TADIYAAK_	-	hypothetical protein	9.24339	0.0157295		CNAG_07522	-	hypothetical protein	7
CNAG_04119	_STS[Phospho (STY)]FSGSSR_	ROM2	rho guanyl-nucleotide exchange factor	9.22302	0.0270645		CNAG_00778	-	hypothetical protein	7
CNAG_00928	_HHAEKESSPIDDGPFAGLS[Phospho (STY)]ESAPNANSR_	-	peptidase	9.19716	0.0129078		CNAG_03319	-	phospholipid binding protein	7
CNAG_06352	_LSPPTTGT[Phospho (STY)]SRPASVASSHR_	CGP1	CAP-Gly protein 1	9.15583	0.022851		CNAG_06828	-	solute carrier family 36 (proton-coupled amino acid transporter)	7
CNAG_05776	_APSGGY[Phospho (STY)]ALPSRPSNSPLHSSGNNR_	-	hypothetical protein	9.14221	0.0244239		CNAG_01360	-	pumilio domain-containing protein c	7
CNAG_03566	_DGHYEDAYPT[Phospho (STY)]LNQSMEHLK_	-	hypothetical protein	9.12605	0		CNAG_06839	-	Methylene-fatty-acyl-phospholipid synthase	7
CNAG_05531	_QHHRS[Phospho (STY)]DGADNDLEQGSMAQDENADEILR_	-	DNA excision repair protein ERCC-4	9.12498	0.00854054		CNAG_04587	-	hypothetical protein, variant	7
CNAG_01212	_SFTPTPPLS[Phospho (STY)]R_	-	hypothetical protein	9.09193	0.0116627		CNAG_06352	CGP1	CAP-Gly protein 1	7
CNAG_05250	_ESLTPFGASLTSFDSTAAPLPSTSPNMVASRPTSSSDS[Phospho (STY)]VKPPSPGGSR_	-	telomere maintenance protein	9.0768	0.0112588		CNAG_04119	ROM2	rho guanyl-nucleotide exchange factor	7
CNAG_07522	_PNETPTTGGRTSGEY[Phospho (STY)]LK_	-	hypothetical protein	9.04555	0.0165244		CNAG_05940	ZFC3	hypothetical protein	7
CNAG_02568	_NNTGPAT[Phospho (STY)]PLR_	-	UBA/TS-N domain-containing protein	9.04022	0.0118206		CNAG_02341	-	cyclin binding protein	6
CNAG_04606	_APS[Phospho (STY)]PSNTHHHSPR_	-	hypothetical protein	8.9829	0.01634		CNAG_01143	-	hypothetical protein	6
CNAG_02716	_LSKPNAS[Phospho (STY)]RTPPVK_	-	hypothetical protein	8.98237	0.00714074		CNAG_03815	-	hypothetical protein	6
CNAG_06440	_EVDILTELGFNS[Phospho (STY)]LLHENAFGDSAEEREIFEK_	-	DNA dependent ATPase	8.97408	0.00950413		CNAG_07517	-	hypothetical protein	6
CNAG_00583	_ALPPTPILVPS[Phospho (STY)]KSPSSNLGSQIAAGSK_	-	hypothetical protein	8.93152	0.0163107		CNAG_03966	-	hypothetical protein	6
CNAG_03655	_NPSLSSFDSYAGT[Phospho (STY)]VPKPR_	-	hypothetical protein, variant	8.92994	0.0108971		CNAG_00666	-	nucleoporin NSP1	6
CNAG_05874	_SVTPEAAPLS[Phospho (STY)]SVR_	-	hypothetical protein	8.91708	0.0205465		CNAG_03135	-	hypothetical protein	6
CNAG_00497	_AGSSSPSTSGVIDSPS[Phospho (STY)]KSISAR_	-	hypothetical protein	8.91013	0		CNAG_01941	-	glucan synthesis regulatory protein	6
CNAG_07411	_IDRT[Phospho (STY)]GTPIQSAAGPAATSFVPHTIQK_	RUM1alpha	histone demethylase JARID1	8.90821	0.00421622		CNAG_06896	-	cytoplasmic protein	6
CNAG_02201	_AAS[Phospho (STY)]GTGHFAKPPPVPSASK_	-	hypothetical protein	8.89829	0.0303063		CNAG_07595	-	hypothetical protein	6
CNAG_02922	_QSLPAT[Phospho (STY)]PK_	-	hypothetical protein	8.88773	0.00685714		CNAG_00184	-	pre-mRNA cleavage complex 2 protein Pcf11	6
CNAG_03771	_RNSGIALQDS[Phospho (STY)]GPVPR_	-	DNA binding protein Ncp1, variant	8.88472	0.0234071		CNAG_07538	-	calcium/proton exchanger	6
CNAG_03463	_AEASPTPGES[Phospho (STY)]EFHTPLSS[Phospho (STY)]PKPVR_	-	hypothetical protein	8.87612	0.010742		CNAG_00402	-	translation initiation factor 4G	6
CNAG_03267	_PTPSTTTNGTGPHTTVT[Phospho (STY)]APIK_	-	splicing factor 3B subunit 2	8.84736	0.0159351		CNAG_04676	-	6-phosphofructokinase	6
CNAG_07938	_RLTFPEEDPDFPLYEQALGSPS[Phospho (STY)]IAER_	-	hypothetical protein	8.84046	0.00177778		CNAG_04954	-	hypothetical protein	6
CNAG_01322	_QEDSQSEDQVAT[Phospho (STY)]PPESTDTSRLDFEQNEEGTR_	-	hypothetical protein	8.84044	0.014449		CNAG_05314	GLO3	ADP-ribosylation factor GTPase-activating protein 2/3	6
CNAG_00386	_RVPQSSQPSTPAAAPIPIS[Phospho (STY)]ENAWTR_	-	translation initiation factor 4G	8.83614	0.0226878		CNAG_04586	HOB7	LIM-homeobox protein, variant	6
CNAG_02341	_GPSPAYT[Phospho (STY)]PTASPPR_	-	cyclin binding protein	8.8329	0.0155355		CNAG_00387	LPI13	hypothetical protein	6
CNAG_04478	_RESIGNPKS[Phospho (STY)]PTGLPASSSER_	-	hypothetical protein	8.80631	0.00831034		CNAG_03673	PPZ1	serine/threonine-protein phosphatase PP-Z1	6
CNAG_04284	_TESAPPAEENKEESAAEPVT[Phospho (STY)]DEK_	-	hypothetical protein	8.79373	0.0126124		CNAG_07903	ROM20	Predicted Rho guanine nucleotide exchange factor (Rho GEF)	6
CNAG_07941	_FLAGQS[Phospho (STY)]HAALFDDFGVGGGVSGAC[Carbamidomethyl (C)]TTYYGAR_	-	hypothetical protein, variant	8.7764	0.0162714		PDK1	PDK1	#N/A	6
CNAG_00737	_QFITS[Phospho (STY)]SPK_	-	hypothetical protein	8.77245	0.00868908		CNAG_05510	-	hypothetical protein	5
CNAG_02092	_QGNNVPQPTPST[Phospho (STY)]PGTPTPPNK_	-	protein EFR3	8.76896	0.0141608		CNAG_05843	-	translation initiation factor 4E	5
CNAG_02568	_PGPLAAFDQGPKPPVAAQPTVQPLSANT[Phospho (STY)]TGSALPQLTPADR_	-	UBA/TS-N domain-containing protein	8.73727	0.0117942		CNAG_04348	-	chaperone	5
CNAG_03841	_FFVQSSPS[Phospho (STY)]KGSASDSPLPSPVTSAALNPPSR_	-	hypothetical protein	8.71131	0.0149361		CNAG_04213	-	signal transducer	5
CNAG_03003	_TRVSTPS[Phospho (STY)]IQNTYTNR_	-	chromatin structure-remodeling complex subunit SFH1	8.69831	0.0203298		CNAG_04303	-	E3 ubiquitin-protein ligase bre1	5
CNAG_05499	_GISSNTMNS[Phospho (STY)]GGYGGGYAPAAMEGTPQK_	-	SHO1 osmosensor	8.68963	0.0164209		CNAG_07605	-	hypothetical protein	5
CNAG_03846	_VTSPLSPAPVS[Phospho (STY)]R_	-	vacuolar membrane protein	8.67725	0.020241		CNAG_07562	-	hypothetical protein	5
CNAG_05785	_SPS[Phospho (STY)]PPHHLPSVASALSDR_	STB4	putative transcription factor	8.66615	0.0156589		CNAG_03763	-	IQ domain-containing GTPase activating protein	5
CNAG_03672	_FSASAPLPTT[Phospho (STY)]PLAR_	-	BET3 family protein	8.65795	0.013382		CNAG_01207	-	hypothetical protein	5
CNAG_00235	_GGAAIGDLDGDT[Phospho (STY)]AVESQHSR_	AMT1	amt family ammonium transporter	8.6567	0.0127097		CNAG_07477	-	hypothetical protein, variant	5
CNAG_00424	_SPPTTSS[Phospho (STY)]IQSPNSAGGPPK_	-	choline-phosphate cytidylyltransferase	8.64504	0.0165192		CNAG_06599	-	hypothetical protein	5
CHS4	_SSIASGADS[Phospho (STY)]DSKYWAIYNNK_	#N/A	#N/A	8.62968	0.0159339		CNAG_04832	-	RalA-binding protein 1	5
CNAG_03072	_AEVPSGASTGAHEAVELRDKGSDY[Phospho (STY)]MGK_	-	enolase	8.6273	0.0162968		CNAG_06740	-	septation protein imp2	5
CNAG_05457	_NLITHY[Phospho (STY)]RSPR_	-	Pentatricopeptide repeat protein	8.6242	0.0150353		CNAG_01082	-	hypothetical protein	5
CNAG_03052	_SEPQEDAYS[Phospho (STY)]DAVKVEGLM[Oxidation (M)]DKSESPLNL_	PTC2	PP2Cc protein phosphatase	8.60347	0.012966		CNAG_02789	-	nitrogen permease regulator 2	5
CNAG_01143	_TTRGDGYS[Phospho (STY)]SPPAGPSNPR_	-	hypothetical protein	8.5951	0.00693525		CNAG_03479	-	hypothetical protein	5
CNAG_04119	_S[Phospho (STY)]TSFSGSSR_	ROM2	rho guanyl-nucleotide exchange factor	8.58564	0.0298583		CNAG_00520	-	hypothetical protein	5
CNAG_03485	_ST[Phospho (STY)]PPPTTSSDPHQTTDLSNSEDR_	-	polyamine transporter 1	8.55779	0.0206066		CNAG_07373	-	Carbamoyl-phosphate synthase, large subunit	5
CNAG_00778	_RSGGPS[Phospho (STY)]PLSQGLISATGK_	-	hypothetical protein	8.55283	0		CNAG_04658	-	hypothetical protein	5
HAD1	_SAFTM[Oxidation (M)]SALPSPNT[Phospho (STY)]S[Phospho (STY)]QPPSAAPSRR_	#N/A	#N/A	8.55031	0.0365597		CNAG_01649	-	hypothetical protein	5
CNAG_01149	_VTSPAHISPTS[Phospho (STY)]PK_	-	hypothetical protein	8.52926	0.0135143		CNAG_06282	BUN107	WD-repeat protein 48	5
CNAG_01973	_RC[Carbamidomethyl (C)]HPT[Phospho (STY)]PPPVDHSTSPPALNR_	ZFC2	C2H2 zinc finger protein Zas1A	8.50871	0.0476851		CNAG_04040	FPK1	AGC/RSK protein kinase, variant	5
CNAG_03408	_PTGLPSNLLRPVTPT[Phospho (STY)]STPAGAK_	-	hypothetical protein	8.50497	0.0156348		CNAG_03116	HCM1	forkhead transcription factor 3	5
CNAG_02528	_SSSQFTSTPSTSS[Phospho (STY)]PNSPTR_	-	hypothetical protein, variant	8.49576	0.0297059		CNAG_01183	LSB1	hypothetical protein	5
CNAG_02940	_RPTSEGFFPYPPS[Phospho (STY)]ISDGETPRDGGMSPK_	-	calcium/proton exchanger	8.49275	0.0218029		CNAG_04282	MPK2	CMGC/MAPK protein kinase	5
CNAG_02877	_SPY[Phospho (STY)]SSPNSSNNALAPTEPVSYR_	FZC51	hypothetical protein	8.48767	0.0357942		CNAG_02028	SKY1	CMGC/SRPK protein kinase	5
CLR4	_PTAAPSLFAS[Phospho (STY)]GVTTK_	#N/A	#N/A	8.48019	0.0203084		CHS8	CHS8	#N/A	5
CNAG_05510	_RPTFPPDTTDESSVSTPASAS[Phospho (STY)]APSSPETHPIPVSQR_	-	hypothetical protein	8.45741	0.013745		CNAG_02293	-	hypothetical protein	4
CNAG_03319	_T[Phospho (STY)]IGDIQDAIESYAR_	-	phospholipid binding protein	8.45479	0.0118593		CNAG_00056	-	hypothetical protein	4
CNAG_01526	_SPGSAS[Phospho (STY)]PT[Phospho (STY)]SPIR_	-	cleavage and polyadenylation specificity factor subunit 4	8.44872	0.0147629		CNAG_02201	-	hypothetical protein	4
CNAG_02785	_TGDLQT[Phospho (STY)]YGSPAGK_	-	hypothetical protein	8.4487	0.021262		CNAG_04327	-	hypothetical protein	4
CNAG_02318	_VPTSPAQSPSPPQNQAS[Phospho (STY)]PGSR_	-	hypothetical protein	8.44722	0.0441298		CNAG_01833	-	translation initiation factor 4E	4
CNAG_05484	_GATSS[Phospho (STY)]PGGSANASFASESMDSYVSHDR_	-	CAMKK/CAMKK-META protein kinase	8.44216	0.011049		CNAG_01212	-	hypothetical protein	4
CNAG_00426	_SPAVSQPTISRPS[Phospho (STY)]PS[Phospho (STY)]PKPQPK_	-	UBA/TS-N domain-containing protein	8.43411	0.00907018		CNAG_00583	-	hypothetical protein	4
CNAG_02300	_S[Phospho (STY)]ISPTAQLR_	-	hypothetical protein	8.40839	0.0202522		CNAG_00386	-	translation initiation factor 4G	4
CNAG_07411	_IDRTGT[Phospho (STY)]PIQSAAGPAATSFVPHTIQK_	RUM1alpha	histone demethylase JARID1	8.40556	0.00845614		CNAG_02092	-	protein EFR3	4
CNAG_00670	_TNSILSLLNGPMSSSPPS[Phospho (STY)]FIGPSNSFTHK_	FZC12	hypothetical protein, variant	8.40311	0.010834		CNAG_00426	-	UBA/TS-N domain-containing protein	4
CNAG_03841	_T[Phospho (STY)]QSTGTLESGQSSR_	-	hypothetical protein	8.39176	0.0164484		CNAG_00981	-	hypothetical protein	4
CNAG_01728	_TNAALSPPPS[Phospho (STY)]AR_	-	hypothetical protein	8.38866	0.0140506		CNAG_05768	-	hypothetical protein	4
CNAG_04694	_DNEEDPYIT[Phospho (STY)]LK_	PWP1	periodic tryptophan protein 1	8.38068	0.0116424		CNAG_00241	-	protein AIR1/2	4
CNAG_01454	_HRSMT[Phospho (STY)]PSLPASGR_	STE12alpha	transcription factor STE12	8.37396	0.0170726		CNAG_02024	-	hypothetical protein	4
CNAG_04786	_GGLPASNTVTSKPSIS[Phospho (STY)]PQLPPASAGSASASAAR_	-	hypothetical protein, variant	8.36977	0.0335052		CNAG_04496	-	rab GTPase activator	4
CNAG_01123	_DRSLEYY[Phospho (STY)]R_	-	DRAP deaminase	8.36849	0.0191037		CNAG_04772	-	hypothetical protein	4
PDK1	_HGHLS[Phospho (STY)]TPSSPTNSYR_	#N/A	#N/A	8.36307	0.0137972		CNAG_07848	-	hypothetical protein	4
CNAG_01142	_TSSLASVGVS[Phospho (STY)]PSK_	-	endoplasmic reticulum protein	8.34941	0.011493		CNAG_02041	-	hypothetical protein	4
CNAG_04282	_GPSGTGTQTPATTALGAPIGPT[Phospho (STY)]PPQTGASK_	MPK2	CMGC/MAPK protein kinase	8.34635	0.0126484		CNAG_06666	-	starch phosphorylase	4
CNAG_05222	_THLSPT[Phospho (STY)]LRR_	NRG1	transcriptional regulator Nrg1	8.34031	0.0164888		CNAG_00539	-	membrane transporter	4
CNAG_06470	_LEHSSSPTY[Phospho (STY)]PGDNTDEIPEVAFPSLPSHAPQEADTDDGVDEETRQK_	-	hypothetical protein	8.33855	0.036769		CNAG_01298	-	lysophospholipase NTE1	4
CNAG_02897	_SLTQSSTPPSPSKS[Phospho (STY)]PK_	KCS1	inositol hexaphosphate kinase 1	8.32557	0.0132781		CNAG_01408	-	PH and SEC7 domain-containing protein	4
CNAG_00981	_GGRSLS[Phospho (STY)]TVLDEGTGESTSMR_	-	hypothetical protein	8.31761	0.0147353		CNAG_04962	-	hypothetical protein	4
CNAG_06577	_GVT[Phospho (STY)]PIRMAAAPNAITAIPTTDALAR_	-	hypothetical protein	8.29232	0.0265066		CNAG_06897	-	hypothetical protein	4
CNAG_00267	_EINQVHT[Phospho (STY)]PPQADTVQR_	-	hypothetical protein	8.28998	0.0109692		CNAG_03425	-	hypothetical protein	4
CNAG_02994	_ATGVDLT[Phospho (STY)]HSSPTETNGSAPPASAVAALDEK_	-	hypothetical protein, variant	8.28699	0.0182195		CNAG_03886	-	hypothetical protein	4
CNAG_05768	_GSGSSY[Phospho (STY)]DYASGSASPLMSPEAVGGERGR_	-	hypothetical protein	8.28115	0.0119377		CNAG_07815	-	hypothetical protein	4
CNAG_03815	_ASVVSVASSGSPHT[Phospho (STY)]AYR_	-	hypothetical protein	8.28052	0.0134653		CNAG_01282	-	hypothetical protein	4
CNAG_04620	_GGVSGETADANERSSTQAEETVIAS[Phospho (STY)]EK_	-	hypothetical protein	8.27891	0.0190692		CNAG_01587	-	RNA polymerase-associated protein LEO1	4
CNAG_04151	_AATAVNSLPPSDQFLS[Phospho (STY)]PTLQR_	-	oxysterol-binding protein	8.27045	0.0114587		CNAG_04697	-	zinc finger protein	4
CNAG_01903	_AKST[Phospho (STY)]AEPEEKPNVVGEPPVPPAPAVASTR_	-	hypothetical protein	8.26147	0.0118122		CNAG_06363	-	Nucleolar protein	4
HAD1	_SAFTM[Oxidation (M)]SALPSPNTSQPPS[Phospho (STY)]AAPS[Phospho (STY)]RR_	#N/A	#N/A	8.25991	0.0174089		CNAG_04137	-	hypothetical protein	4
CNAG_00777	_APEQASHET[Phospho (STY)]PQSATPMNAR_	-	CCR4-NOT transcriptional complex subunit CAF120	8.25585	0.0244195		CNAG_06332	-	hypothetical protein	4
CNAG_07312	_GQIQGGSGQS[Phospho (STY)]GQNKDQVGTENSGGWEDGLGEK_	-	hypothetical protein	8.25363	0.0308643		CNAG_06473	-	hypothetical protein	4
CNAG_00106	_SSEWS[Phospho (STY)]EEMGK_	TCO5	Two-component-like sensor kinase	8.25044	0.00957407		CNAG_01126	-	guanine nucleotide exchange protein for ADP- robosylation factor	4
CNAG_04725	_LSSHHS[Phospho (STY)]S[Phospho (STY)]RPPSPISPMDQIDSTSFR_	-	hypothetical protein, variant	8.24378	0.0125561		CNAG_06019	-	hypothetical protein, variant	4
CNAG_04991	_SNLSHTSLVGSSSSY[Phospho (STY)]R_	-	hypothetical protein	8.23859	0.0375162		CNAG_03100	-	cytoplasmic protein	4
CNAG_00387	_SLPSRQS[Phospho (STY)]PGGLYK_	LPI13	hypothetical protein	8.23543	0.0024		CNAG_05634	-	protein phosphatase 2 (formerly 2A), regulatory subunit B'	4
CNAG_03697	_SYPQSPAAS[Phospho (STY)]GWK_	-	hormone-sensitive lipase	8.23538	0.0171318		CNAG_05864	-	hypothetical protein	4
CNAG_01824	_IRT[Phospho (STY)]PS[Phospho (STY)]VSSK_	-	transmembrane protein, variant	8.22359	0.00883761		CNAG_01335	-	hypothetical protein	4
CNAG_01016	_NFS[Phospho (STY)]RSPSMTR_	SEA3	vacuolar membrane protein	8.21867	0.0142674		CNAG_00625	-	ARF guanyl-nucleotide exchange factor	4
CNAG_00241	_AMDS[Phospho (STY)]PSVR_	-	protein AIR1/2	8.20956	0.0258231		CNAG_05889	-	hypothetical protein	4
CNAG_07517	_TLVPPGAHLAPVDLPPPPPSADPREPS[Phospho (STY)]PVSVTR_	-	hypothetical protein	8.20859	0.0301214		CNAG_05452	-	hypothetical protein	4
CNAG_01897	_[Acetyl (Protein N-term)]SEATETPIPPPS[Phospho (STY)]NVTEPPRSPNPLNPATDAQGENIQPPVER_	BDF1	bromodomain-containing factor 1	8.20462	0.0134184		CNAG_04788	-	hypothetical protein	4
CNAG_00365	_WIEGEETPGAT[Phospho (STY)]PGGTPK_	-	lysophospholipid acyltransferase	8.2014	0.0160098		CNAG_05841	-	hypothetical protein	4
CNAG_06192	_S[Phospho (STY)]GSVRSPYGSPQDGR_	-	hypothetical protein	8.18874	0.0120091		CNAG_00992	-	homocitrate synthase, mitochondrial	4
KRT10	_GSSGGGC[Carbamidomethyl (C)]FGGSSGGY[Phospho (STY)]GGLGGFGGGSFR_	#N/A	#N/A	8.1883	0.0161591		CNAG_02857	-	hypothetical protein	4
CNAG_00095	_SPTPTGHQGNPT[Phospho (STY)]LK_	-	hypothetical protein	8.1828	0.0114242		CNAG_02684	-	hypothetical protein	4
CNAG_06765	_IPS[Phospho (STY)]SGPPPATR_	LMP1	Low mating performance protein	8.17729	0.00213333		CNAG_02121	-	hypothetical protein	4
CNAG_07483	_RPISPS[Phospho (STY)]IAATHR_	-	DNA polymerase zeta subunit	8.17342	0.0112752		CNAG_04639	-	hypothetical protein	4
CNAG_06749	_IKS[Phospho (STY)]ISGT[Phospho (STY)]S[Phospho (STY)]TEKGATTPDFVFR_	-	hypothetical protein	8.17164	0.0115208		CNAG_07675	-	neurofibromin 1	4
CNAG_03494	_VQEDQQIAPPS[Phospho (STY)]PQS[Phospho (STY)]PADKK_	-	hypothetical protein	8.16647	0.00656842		CNAG_06674	-	hypothetical protein	4
CNAG_02989	_QSS[Phospho (STY)]PLAQGR_	-	PX domain-containing protein	8.16628	0.0133453		CNAG_05100	-	ENTH domain-containing protein c	4
CNAG_04198	_AAS[Phospho (STY)]ISVPSR_	-	hypothetical protein	8.16554	0.015618		CNAG_00354	-	vacuolar protein 8	4
CNAG_00674	_S[Phospho (STY)]ITADEIKR_	-	hypothetical protein	8.16541	0.0145082		CNAG_04079	-	HAT1-interacting factor 1	4
CNAG_01150	_AVT[Phospho (STY)]PPAGQVEK_	-	omega-6 fatty acid desaturase (delta-12 desaturase)	8.15461	0.0212865		CNAG_01897	BDF1	bromodomain-containing factor 1	4
CNAG_06710	_ARVS[Phospho (STY)]VHAADVK_	-	hypothetical protein	8.15293	0.0120641		CNAG_01918	BUD6	cytoskeletal regulatory protein binding protein	4
CNAG_03457	_KNPNVLVPQS[Phospho (STY)]INEIDLSILNEPK_	-	arginine-tRNA ligase	8.14749	0.0070566		CNAG_02866	CAB1	Pantothenate kinase	4
CNAG_03818	_S[Phospho (STY)]GSPNNSLSR_	SSK1	osomolarity two-component system, response regulator SSK1	8.14364	0.0163044		CNAG_04864	CIR1	iron regulator 1, variant	4
CNAG_07517	_TLVPPGAHLAPVDLPPPPPSADPREPSPVSVT[Phospho (STY)]R_	-	hypothetical protein	8.13892	0.0377017		CNAG_02566	FKH2	hepatocyte nuclear factor	4
CNAG_01400	_RT[Phospho (STY)]TSSIVR_	-	3-deoxy-7-phosphoheptulonate synthase	8.13695	0.00223256		CNAG_03115	FZC46	hypothetical protein	4
CNAG_03907	_RPS[Phospho (STY)]PHSLTPSSR_	-	LIM domain containing protein	8.13067	0.00925786		CNAG_04176	HSF2	hypothetical protein	4
CNAG_01809	_ASPAVAPAPVLNPYAAGSAANS[Phospho (STY)]PAPDEER_	-	U4/U6 small nuclear ribonucleoprotein Prp3	8.12675	0.0296683		CNAG_05558	KIN4	CAMK/CAMKL/KIN4 protein kinase	4
CNAG_03818	_TRMDPFDTFDPVS[Phospho (STY)]SSSEDDPVPQESR_	SSK1	osomolarity two-component system, response regulator SSK1	8.12518	0.0142035		CNAG_00914	KRE6	glucosidase	4
CNAG_03966	_SADVPT[Phospho (STY)]LNKR_	-	hypothetical protein	8.12089	0.0212554		CNAG_06327	MIG1	DNA-binding protein creA, variant	4
CNAG_01795	_SDRLAQS[Phospho (STY)]APDDTTAFGR_	-	hypothetical protein	8.1177	0.0148217		CNAG_05222	NRG1	transcriptional regulator Nrg1	4
CNAG_07744	_SLPHS[Phospho (STY)]PSSSALGK_	PIK1	1-phosphatidylinositol 4-kinase	8.11584	0.0197854		CNAG_00396	PKA1	AGC/PKA protein kinase	4
CNAG_07942	_S[Phospho (STY)]GSITSTASR_	-	cell division control protein 25	8.10635	0.0229225		CNAG_00570	PKR1	cAMP-dependent protein kinase regulator	4
CNAG_01833	_[Acetyl (Protein N-term)]SST[Phospho (STY)]T[Phospho (STY)]IPPAAVTANSNTLNSALAAEQISSPASPVGKPVDEK_	-	translation initiation factor 4E	8.10548	0.0191961		CNAG_07411	RUM1alpha	histone demethylase JARID1	4
CNAG_06192	_TVSSPLS[Phospho (STY)]GR_	-	hypothetical protein	8.1035	0.0220643		CNAG_06301	SCH9	AGC/AKT protein kinase	4
CNAG_05748	_NSLGGASPAVS[Phospho (STY)]T[Phospho (STY)]PKPAPR_	-	NuA3 HAT complex component NTO1	8.1025	0.0219192		CNAG_05734	SLA2	cell wall organization and biogenesis-related protein, putative	4
CNAG_03161	_[Acetyl (Protein N-term)]SQPSPSY[Phospho (STY)]VPR_	-	hypothetical protein	8.10078	0.0245526		CNAG_00051	SNT1	putative set3c deacetylase complex subunit	4
CNAG_00106	_ERRS[Phospho (STY)]SEWSEEMGK_	TCO5	Two-component-like sensor kinase	8.09441	0.0159173		CNAG_05428	TAF5	transcription initiation factor TFIID subunit 5, variant	4
CNAG_04405	_[Acetyl (Protein N-term)]ALSGQTTPSEAGPS[Phospho (STY)]KPSLIPGPSAYHESSQFR_	-	cyclin H	8.09426	0.00944292		CNAG_04316	UTR1	NAD kinase	4
CNAG_03337	_AAPS[Phospho (STY)]REEYISNMQGAFK_	-	hypothetical protein	8.08636	0.0120917		CNAG_04433	YAK103	CMGC/DYRK/DYRK2 protein kinase	4
CNAG_02024	_GKEAS[Phospho (STY)]PEMIRLPDT[Phospho (STY)]PS[Phospho (STY)]PEGEK_	-	hypothetical protein	8.08428	0.0159121		LHP1	LHP1	#N/A	4
CNAG_02338	_AC[Carbamidomethyl (C)]YTC[Carbamidomethyl (C)]GQEGHLSS[Phospho (STY)]AC[Carbamidomethyl (C)]PQGPGAGGFGGASGGGEC[Carbamidomethyl (C)]YR_	-	cellular nucleic acid-binding protein	8.08358	0.017933		AFR1	AFR1	#N/A	4
INO1	_GSDGKLS[Phospho (STY)]VK_	#N/A	#N/A	8.07454	0.0253032		CNAG_02220	-	hypothetical protein	3
CNAG_04496	_VIS[Phospho (STY)]PLASPVNLETSTMPAQIHPPAPSR_	-	rab GTPase activator	8.07035	0.0128854		CNAG_02488	-	methionyl-tRNA formyltransferase	3
CNAG_00387	_SLPS[Phospho (STY)]RQSPGGLYK_	LPI13	hypothetical protein	8.06524	0.0174974		CNAG_00928	-	peptidase	3
CNAG_06983	_ASGAPPPS[Phospho (STY)]PK_	-	hypothetical protein	8.05877	0.0139939		CNAG_03566	-	hypothetical protein	3
CNAG_07485	_EQRGDDDLDGDGPEAY[Phospho (STY)]EMADRDSSGESEAVR_	-	membrane protein, variant	8.05599	0.0122279		CNAG_02716	-	hypothetical protein	3
CNAG_04163	_TETGPTTPAKGDT[Phospho (STY)]EAVDK_	-	hypothetical protein	8.05303	0.0113533		CNAG_03771	-	DNA binding protein Ncp1, variant	3
CNAG_05843	_QLSEHLHYTPSTPSS[Phospho (STY)]QQPNPPDQSLDSSSSNPLR_	-	translation initiation factor 4E	8.04581	0.0191703		CNAG_07938	-	hypothetical protein	3
CNAG_00613	_SPVEGSPAKPEDYPHFMS[Phospho (STY)]VAHEQALK_	FCY1	Cytosine deaminase	8.0439	0.0264372		CNAG_00424	-	choline-phosphate cytidylyltransferase	3
CNAG_08023	_GTPSPSPS[Phospho (STY)]VR_	-	hypothetical protein	8.03368	0.0222046		CNAG_02940	-	calcium/proton exchanger	3
CNAG_02994	_VDAATDATS[Phospho (STY)]PQGSAPPASAVAALDEK_	-	hypothetical protein, variant	8.02524	0.0231526		CNAG_02785	-	hypothetical protein	3
PTP2	_RPSLASVQTSSDRVSS[Phospho (STY)]ESISSC[Carbamidomethyl (C)]LADPEPVTFSNR_	#N/A	#N/A	8.02143	0.0113859		CNAG_04991	-	hypothetical protein	3
CNAG_04772	_GSYETGYGGPPSGPS[Phospho (STY)]PGRYHDAPPAPASVTEDRLEQALR_	-	hypothetical protein	8.01749	0.0211916		CNAG_01150	-	omega-6 fatty acid desaturase (delta-12 desaturase)	3
CNAG_01174	_RVQWTSDPHIVQLQPIEPAPGS[Phospho (STY)]PHTLDSSNIDEFRNALER_	-	hypothetical protein	8.01549	0.0279313		CNAG_01809	-	U4/U6 small nuclear ribonucleoprotein Prp3	3
CNAG_05468	_ERS[Phospho (STY)]AS[Phospho (STY)]SPLTELEPEAPAPK_	APN1	AP endonuclease 1	8.0032	0.015797		CNAG_03337	-	hypothetical protein	3
CNAG_03945	_TEEGLLS[Phospho (STY)]PLNLSEEKTPSSSGR_	-	hypothetical protein	7.99641	0.0214536		CNAG_01174	-	hypothetical protein	3
CNAG_05976	_VDALSDADSRSDVSAAEVGIS[Phospho (STY)]NR_	-	nucleolar protein 58	7.99117	0.01684		CNAG_03945	-	hypothetical protein	3
CNAG_02220	_ASGVQAPSLAS[Phospho (STY)]GR_	-	hypothetical protein	7.9909	0.0371564		CNAG_02606	-	hypothetical protein	3
PTP2	_RPS[Phospho (STY)]LASVQTSSDRVSSESISSC[Carbamidomethyl (C)]LADPEPVTFSNR_	#N/A	#N/A	7.99029	0.0116212		CNAG_06336	-	glucan 1,3-beta-glucosidase	3
CNAG_01062	_GLAPPGS[Phospho (STY)]PRPGDAIPPK_	PSK201	CAMK/CAMKL/PASK protein kinase	7.9857	0.0115294		CNAG_04604	-	tryptophan-tRNA ligase	3
CNAG_02606	_NEFVGSPNPPMSSPGLMQY[Phospho (STY)]R_	-	hypothetical protein	7.9839	0.016242		CNAG_03023	-	hypothetical protein	3
CNAG_02942	_GLATQVDNGSY[Phospho (STY)]TSY[Phospho (STY)]DPANGYVAPTGDAVTPLPAAHVR_	-	hypothetical protein	7.97987	0.015629		CNAG_04027	-	hypothetical protein	3
CNAG_03120	_VSS[Phospho (STY)]FDSISS[Phospho (STY)]IVDEKGSSPLNK_	AGS1	alpha-1,3-glucan synthase	7.97754	0.0155238		CNAG_05083	-	esterase/lipase	3
CNAG_02458	_S[Phospho (STY)]EGKADLAPPIAAVSPHATNPTPPTATSVSK_	-	GTPase activating protein	7.97217	0.0113374		CNAG_05272	-	hypothetical protein, variant	3
CNAG_04361	_ASVLSDNSSVTS[Phospho (STY)]KEGK_	-	hypothetical protein	7.96982	0.0117873		CNAG_03295	-	hypothetical protein	3
CNAG_07848	_PAT[Phospho (STY)]LHSGSTASLPSANHR_	-	hypothetical protein	7.96868	0.0239446		CNAG_01199	-	nuclear pore complex protein Nup62	3
PTP2	_SPSPLASSVSGSQSPGGM[Oxidation (M)]KPQM[Oxidation (M)]IAPT[Phospho (STY)]DLAK_	#N/A	#N/A	7.96703	0.0211634		CNAG_03117	-	hypothetical protein	3
CNAG_05292	_SGSLS[Phospho (STY)]RTSS[Phospho (STY)]KASIQR_	TPS1	alpha,alpha-trehalose-phosphate synthase (UDP- forming)	7.95979	0.048049		CNAG_00398	-	hypothetical protein	3
CNAG_06200	_RLSSGS[Phospho (STY)]PPPQSSSSASSSR_	-	hypothetical protein, variant	7.95719	0.0174524		CNAG_01182	-	cytoplasmic protein	3
CNAG_06158	_YEQQTSPPQQS[Phospho (STY)]QYQSPPSR_	-	hypothetical protein	7.95617	0.0250151		CNAG_01655	-	dynamin GTPase	3
CNAG_06336	_LSNSNYADPY[Phospho (STY)]ATPDTSDTTMPPMTQVSQPSATFQK_	-	glucan 1,3-beta-glucosidase	7.943	0.0195214		CNAG_00879	-	Glutamate dehydrogenase	3
CNAG_06063	_SGLDEQIIT[Phospho (STY)]DNSVPRVSQYR_	-	cytochrome c oxidase assembly protein subunit 15	7.9422	0.0188977		CNAG_07375	-	guanyl-nucleotide exchange factor	3
CNAG_06828	_SISIS[Phospho (STY)]RNS[Phospho (STY)]PNINS[Phospho (STY)]GGTPPVPNIPSR_	-	solute carrier family 36 (proton-coupled amino acid transporter)	7.92644	0.0111571		CNAG_01591	-	hypothetical protein	3
CNAG_04720	_AGEMQGMEISAVLS[Phospho (STY)]VEGKEEVYAGK_	-	GTPase activating protein	7.92616	0.0196606		CNAG_05599	-	hypothetical protein	3
CNAG_07491	_MHFDEPIS[Phospho (STY)]PRS[Phospho (STY)]QPSNLPGFESR_	-	glutaredoxin	7.92551	0.0158705		CNAG_02822	-	hypothetical protein	3
CNAG_04321	_M[Oxidation (M)]SM[Oxidation (M)]VPASPT[Phospho (STY)]LPSHAPGDFSEQRR_	-	hypothetical protein	7.91909	0.0325087		CNAG_05349	-	hypothetical protein	3
PDK1	_AGIPS[Phospho (STY)]FGLGPGSGSR_	#N/A	#N/A	7.91864	0.0123466		CNAG_03989	-	hypothetical protein	3
CNAG_05734	_TIS[Phospho (STY)]AT[Phospho (STY)]SNNSEPK_	SLA2	cell wall organization and biogenesis-related protein, putative	7.91657	0.0352162		CNAG_05343	-	hypothetical protein	3
CNAG_02703	_PISASSKPVASQASTVSSSAKGFT[Phospho (STY)]LGNFLATMNNK_	-	hypothetical protein, variant	7.91185	0.0111878		CNAG_07163	-	preprotein translocase subunit YidC	3
CNAG_06661	_NASGSLNANERAESPT[Phospho (STY)]PGYPAES[Phospho (STY)]LGSPLR_	-	hypothetical protein	7.9109	0.0154905		CNAG_05747	-	vacuolar protein sorting-associated protein VTA1, variant 2	3
CNAG_04710	_MSVESNSAGWNY[Phospho (STY)]GTAPSSGYAPDGSLNSAGHGRR_	-	hypothetical protein	7.90758	0.0174896		CNAG_00078	-	vacuolar protein	3
CNAG_05843	_QLSEHLHYTPSTPS[Phospho (STY)]SQQPNPPDQSLDSSSSNPLR_	-	translation initiation factor 4E	7.90743	0.0162178		CNAG_03360	-	hypothetical protein	3
CNAG_03613	_LS[Phospho (STY)]FNHTHTSPQSNR_	-	hypothetical protein	7.90696	0.0170895		CNAG_05230	-	sentrin/sumo-specific protease	3
CNAG_02024	_SPHKEPT[Phospho (STY)]LNHEPSC[Carbamidomethyl (C)]TSK_	-	hypothetical protein	7.90669	0.0139737		CNAG_01420	-	hypothetical protein	3
CNAG_02041	_SISHT[Phospho (STY)]PSPTSSPK_	-	hypothetical protein	7.89506	0.0323923		CNAG_01012	-	hypothetical protein	3
CNAG_04348	_ANS[Phospho (STY)]SRETSTPAS[Phospho (STY)]ASGTPVGGK_	-	chaperone	7.88401	0.0427392		CNAG_06090	-	hypothetical protein	3
CNAG_04604	_IFGPEEGGS[Phospho (STY)]S[Phospho (STY)]ASREDNGGK_	-	tryptophan-tRNA ligase	7.87564	0.0147746		CNAG_07524	-	AMP deaminase	3
CNAG_03023	_EAS[Phospho (STY)]PAPRPAIIPSSENDPITLFTPSSAAHVHVPSTQM[Oxidation (M)]K_	-	hypothetical protein	7.87352	0.014297		CNAG_02796	-	3-deoxy-7-phosphoheptulonate synthase	3
CNAG_04762	_LINSDEIQS[Phospho (STY)]VVRPAGQAVQK_	-	large subunit ribosomal protein L4e	7.86753	0.0281305		CNAG_07431	-	MATE family multidrug resistance protein	3
CNAG_02788	_ALGLPDADT[Phospho (STY)]TDMS[Phospho (STY)]EAER_	-	hypothetical protein	7.86585	0.0288696		CNAG_04740	-	hypothetical protein	3
CNAG_06192	_SPY[Phospho (STY)]GSPQDGRAPR_	-	hypothetical protein	7.86468	0.0157498		CNAG_02658	-	hypothetical protein	3
CNAG_07903	_QYSDTSYATGNSVPLSTPDS[Phospho (STY)]LSSGGPGSPDPPHR_	ROM20	Predicted Rho guanine nucleotide exchange factor (Rho GEF)	7.85418	0.0205307		CNAG_06427	-	hypothetical protein	3
CNAG_01360	_[Acetyl (Protein N-term)]AQPPPT[Phospho (STY)]APRSSLS[Phospho (STY)]PEKVPHR_	-	pumilio domain-containing protein c	7.85257	0.0203172		CNAG_03108	-	hypothetical protein	3
CNAG_01769	_VLS[Phospho (STY)]FGELLLAAGIAGMPAAYMTTPADVVKTR_	-	solute carrier family 25 (mitochondrial aspartate/glutamate transporter), member 12/13	7.84656	0.0212019		CNAG_00337	-	hypothetical protein	3
CNAG_01424	_S[Phospho (STY)]LKDSSSTLGHPTSSPSR_	-	hypothetical protein	7.8436	0.0125584		CNAG_06766	-	U3 small nucleolar RNA-associated protein 14	3
CNAG_05874	_SVTPEAAPLSS[Phospho (STY)]VR_	-	hypothetical protein	7.84272	0.0381424		CNAG_01669	-	metallo-beta-lactamase	3
CNAG_06903	_ASDAGAASTTSQPGT[Phospho (STY)]GSANRLESK_	-	mRNA-decapping enzyme subunit 2	7.84261	0.0114804		CNAG_07551	-	hypothetical protein, variant	3
CNAG_03287	_LEQAIEDLT[Phospho (STY)]SLINSPSQPPSTSMQHSAQTHR_	-	28 kda golgi snare protein	7.83009	0.0170819		CNAG_02605	-	tbc1 domain family protein	3
CNAG_04301	_IAAHPPSPS[Phospho (STY)]ALRK_	-	hypothetical protein, variant	7.82899	0.010803		CNAG_06160	-	guanyl nucleotide exchange factor Sql2	3
CNAG_03152	_S[Phospho (STY)]GM[Oxidation (M)]VSPIQGSFPLQGPPLQQQQGQGSYQRPQR_	-	calcium-binding protein	7.82375	0.0111673		CNAG_04279	-	hypothetical protein	3
CNAG_05415	_LFPPPRPSAGHSSAT[Phospho (STY)]LPSVSHK_	-	hypothetical protein	7.82091	0.0163335		CNAG_06780	-	hypothetical protein	3
CNAG_04213	_VRPEVEIASGESAPSSPLVS[Phospho (STY)]S[Phospho (STY)]PSLAR_	-	signal transducer	7.81999	0.0166249		CNAG_03726	-	hypothetical protein, variant	3
CNAG_01261	_AQAS[Phospho (STY)]RSPS[Phospho (STY)]PPLGATHPR_	-	myosin I binding protein	7.81586	0.0107431		CNAG_01145	-	hypothetical protein	3
CNAG_07532	_AANSPFGGRGYT[Phospho (STY)]ANGGPSETK_	PHO23	hypothetical protein	7.81299	0.0174354		CNAG_01388	-	hypothetical protein	3
CNAG_02091	_GEAEPTESEVEAGQAS[Phospho (STY)]DLEDSDVEDEEEKKAK_	NAP1	Nucleosome assembly protein 1	7.8032	0.0165726		CNAG_03155	-	ENTH domain-containing protein	3
CNAG_00778	_RS[Phospho (STY)]GGPSPLSQGLISATGK_	-	hypothetical protein	7.80119	0.0221507		CNAG_02911	-	hypothetical protein	3
CNAG_06075	_SATSGHT[Phospho (STY)]GSLGEISK_	-	hypothetical protein	7.799	0.0161641		CNAG_01125	-	hypothetical protein	3
CNAG_00175	_T[Phospho (STY)]IPHAQSPPPFPPPPPPAIPAKNDAQSPGPSVGPGAESINR_	-	hypothetical protein	7.79623	0.0192232		CNAG_01248	-	vacuole morphology and inheritance protein 14	3
CNAG_06638	_QAVEDGNAY[Phospho (STY)]DENTIKYVK_	-	malate dehydrogenase (oxaloacetate- decarboxylating)	7.79131	0.0217566		CNAG_07555	-	hypothetical protein, variant	3
CNAG_05421	_APSTSQILHDRY[Phospho (STY)]TPR_	-	hypothetical protein	7.79116	0.014282		CNAG_00342	-	hypothetical protein	3
CNAG_04027	_C[Carbamidomethyl (C)]SPLHHPPSEC[Carbamidomethyl (C)]EQVQMQTQPST[Phospho (STY)]PAYFPIQLPR_	-	hypothetical protein	7.78638	0.013547		CNAG_02139	-	oxysterol-binding protein	3
CNAG_07848	_SSIHGPSHLGPNSPT[Phospho (STY)]HRR_	-	hypothetical protein	7.78611	0.0256072		CNAG_06825	-	hypothetical protein	3
CNAG_03527	_AVGSSS[Phospho (STY)]STSSGAYATPWAAGGAGPSSR_	HEL2	cytoplasmic protein	7.7817	0.0242622		CNAG_03240	-	Mannosyl-oligosaccharide 1,2-alpha-mannosidase	3
CNAG_06666	_SSLSAGHPHSFKQVDPTQIGVPIVT[Phospho (STY)]PR_	-	starch phosphorylase	7.78127	0.0265213		CNAG_01340	-	ATPase	3
CNAG_00070	_ASSGIYTPPTFPGPS[Phospho (STY)]GDHLHLPR_	-	hypothetical protein	7.77869	0.0103059		CNAG_06673	-	hypothetical protein	3
CNAG_05549	_TLS[Phospho (STY)]PDHGTK_	SGV1	CMGC/CDK protein kinase	7.77524	0.0303325		CNAG_04112	-	oxidoreductase	3
CNAG_01278	_GSS[Phospho (STY)]PLSNVDGLGR_	APT2	Aminophospholipid translocase, putative	7.77371	0.020591		CNAG_03502	ALR2	magnesium transporter	3
CNAG_05250	_RSPSGFSLSGLGSNAAVS[Phospho (STY)]PGGGR_	-	telomere maintenance protein	7.77116	0.0109988		CNAG_01278	APT2	Aminophospholipid translocase, putative	3
CNAG_05083	_ILGAPMASSPAQTTPSSSQAS[Phospho (STY)]LRPHGVTSMSLR_	-	esterase/lipase	7.7695	0.0296217		CNAG_02071	BNI4	putative scaffold protein	3
CNAG_02468	_TGELPEGVSALQIRT[Phospho (STY)]PSSR_	-	AP-3 complex subunit delta-1	7.76893	0.0242504		CNAG_06325	BYR4	GTPase activator	3
CNAG_00460	_SPSATHST[Phospho (STY)]TQVNVDDGLTPELR_	LIV1	virulence related protein of unknown function	7.7654	0		CNAG_03346	BZP4	bZip transcription factor, putative	3
CNAG_03485	_DLGLTEEGREETNEKAEHPS[Phospho (STY)]PLAATR_	-	polyamine transporter 1	7.76423	0.0155258		CNAG_00083	CCC1	hypothetical protein	3
CNAG_00696	_NLDVT[Phospho (STY)]SEALLLFGNGDGGGGPTPPMLEK_	-	alpha-mannosidase	7.76038	0.0108231		CNAG_00636	CDC7	CDC7 protein kinase	3
CNAG_03836	_EDSTSPT[Phospho (STY)]LESPPPFR_	-	hypothetical protein, variant	7.76027	0.0162929		CNAG_03412	CHI2	Chitinase	3
CNAG_07903	_ALPT[Phospho (STY)]PPGR_	ROM20	Predicted Rho guanine nucleotide exchange factor (Rho GEF)	7.75698	0.00188235		CNAG_06193	CRK1	CMGC/RCK protein kinase	3
CNAG_02092	_WS[Phospho (STY)]VERAIKDSIER_	-	protein EFR3	7.75612	0.0297456		CNAG_03422	CTS1	calcineurin temperature suppressor Cts1	3
CNAG_04213	_SRLSPNDPS[Phospho (STY)]PHMLNR_	-	signal transducer	7.75413	0.0162584		CNAG_00757	DOA4	ubiquitin carboxyl-terminal hydrolase 8	3
CNAG_00666	_SITANGTSSPFGTAPT[Phospho (STY)]IIANADAAK_	-	nucleoporin NSP1	7.74835	0.0340999		CNAG_03768	FZC32	hypothetical protein, variant	3
CNAG_05272	_FTNS[Phospho (STY)]PPR_	-	hypothetical protein, variant	7.74774	0.0265712		CNAG_06751	HLH3	hypothetical protein	3
CNAG_06839	_GEVAT[Phospho (STY)]PR_	-	Methylene-fatty-acyl-phospholipid synthase	7.74606	0.0113155		CNAG_02829	HSL7	protein arginine N-methyltransferase 5	3
CNAG_04303	_VRENTLDDSPSPS[Phospho (STY)]AK_	-	E3 ubiquitin-protein ligase bre1	7.74569	0.0157049		CNAG_02897	KCS1	inositol hexaphosphate kinase 1	3
CNAG_05590	_SSIDLTSPNS[Phospho (STY)]QPSPLNREQSTYFTHGSATR_	TCO2	Two-component-like sensor kinase	7.74209	0.0165005		CNAG_00460	LIV1	virulence related protein of unknown function	3
CNAG_03295	_VESPSPPATEATTPIS[Phospho (STY)]GIPSPR_	-	hypothetical protein	7.73886	0.011356		CNAG_02930	LIV10	virulence related protein of unknown function	3
CNAG_03402	_MGTPMGT[Phospho (STY)]PRPYTPLPGAIPTSALTQNSDER_	-	hypothetical protein	7.73847	0.0227542		CNAG_07745	MPD1	alcohol dehydrogenase, propanol-preferring	3
CNAG_00424	_MPPPALPPHSSSGSPGTT[Phospho (STY)]QAGRR_	-	choline-phosphate cytidylyltransferase	7.73717	0.0259133		CNAG_02091	NAP1	Nucleosome assembly protein 1	3
CNAG_03815	_NDSEET[Phospho (STY)]LSPSASR_	-	hypothetical protein	7.7314	0.0155217		CNAG_01988	PHY1	bacteriophytochrome histidine kinase, variant	3
CNAG_02995	_SRS[Phospho (STY)]PLPR_	MS1	RNA-binding protein with serine-rich domain 1	7.72562	0.0188855		CNAG_07744	PIK1	1-phosphatidylinositol 4-kinase	3
CNAG_06166	_FSSPSRDT[Phospho (STY)]IDDEIVLPR_	-	ATP-dependent DNA helicase MPH1	7.725	0.0117679		CNAG_05135	PMR1	Ca2 -transporting ATPase	3
CNAG_03438	_SSQQTSART[Phospho (STY)]S[Phospho (STY)]AEDDRIV_	HXT1	hexose transporter	7.7249	0.0310848		CNAG_06142	POL12	DNA polymerase alpha subunit B	3
CNAG_04537	_QMVVSPNAGGS[Phospho (STY)]IQVVAPEEQYIHAQQVDHLHK_	-	hypothetical protein	7.7153	0.0092		CNAG_01023	SCC1	cohesin complex subunit SCC1	3
CNAG_02028	_YGFGMSKIS[Phospho (STY)]GASAAK_	SKY1	CMGC/SRPK protein kinase	7.71433	0.0134771		CNAG_01016	SEA3	vacuolar membrane protein	3
CNAG_03376	_SSTLGQQPSTSANFSS[Phospho (STY)]PIQSQFQR_	-	cytoplasmic protein, variant	7.70951	0.0300652		CNAG_06490	SNF102	CAMK/CAMKL protein kinase	3
CNAG_03135	_VQIGQGSPARQGAFTSSGISGT[Phospho (STY)]VPER_	-	hypothetical protein	7.68303	0.00805298		CNAG_02686	STR3	Cystathionine beta-lyase	3
CNAG_00777	_AVSPQRPT[Phospho (STY)]INTNFDGQGGLVNAVTNGNQEAPGVGK_	-	CCR4-NOT transcriptional complex subunit CAF120	7.68159	0.0190838		CNAG_00363	TCO6	Two-component-like sensor kinase	3
CNAG_04341	_STAGS[Phospho (STY)]LESSHPSTPSPK_	-	recyclin-1	7.68073	0.0115202		CNAG_04314	YEF1	NAD kinase, variant	3
CNAG_06447	_INPYQGHPC[Carbamidomethyl (C)]HIEIILS[Phospho (STY)]VPS[Phospho (STY)]S[Phospho (STY)]EVPRAKDLDTTTSK_	RPL17	Large subunit ribosomal protein L17, putative	7.67355	0.0162849		CNAG_06151	YPD1	osomolarity two-component system, phosphorelay intermediate protein YPD1	3
CNAG_07583	_LSSGGSKAS[Phospho (STY)]PPAR_	-	hypothetical protein	7.67277	0.0314815		CNAG_02700	ZFC8	C2H2 type zinc finger transcription factor	3
CNAG_06839	_ASAPNSDADS[Phospho (STY)]DSGSASAAPIKATPR_	-	Methylene-fatty-acyl-phospholipid synthase	7.67246	0.0285183		CHS4	CHS4	#N/A	3
CNAG_04433	_NLPSTTPT[Phospho (STY)]K_	YAK103	CMGC/DYRK/DYRK2 protein kinase	7.67068	0.0124949		CLR4	CLR4	#N/A	3
CNAG_06327	_SNGGSPVGTPGGPY[Phospho (STY)]GFSNER_	MIG1	DNA-binding protein creA, variant	7.66228	0.0135005		CNAG_01795	-	hypothetical protein	2
CNAG_02028	_YGFGMSKISGAS[Phospho (STY)]AAK_	SKY1	CMGC/SRPK protein kinase	7.65272	0.0381893		CNAG_06583	-	hypothetical protein	2
CNAG_04655	_IDSPSPT[Phospho (STY)]PTISR_	-	rab family protein	7.65079	0.0145919		CNAG_05038	-	hypothetical protein	2
CNAG_00651	_IT[Phospho (STY)]PTPSELYK_	-	ATP-binding cassette, subfamily D (ALD), peroxisomal long-chain fatty acid import protein	7.6492	0.0440719		CNAG_06109	-	hypothetical protein, variant	2
CNAG_01941	_SPHSPLSPHS[Phospho (STY)]VS[Phospho (STY)]FHSPHSPYSSR_	-	glucan synthesis regulatory protein	7.64555	0.0154735		CNAG_06664	-	sorting nexin Mvp1	2
CNAG_00240	_DLSVNTMNVPS[Phospho (STY)]PVDGEAET[Phospho (STY)]PTGSSGGK_	-	hypothetical protein	7.62903	0.011269		CNAG_01142	-	endoplasmic reticulum protein	2
CNAG_00539	_AGFIPADDVDHGLQPMRS[Phospho (STY)]R_	-	membrane transporter	7.62878	0.0158068		CNAG_03237	-	hypothetical protein	2
CNAG_02341	_GPSPAY[Phospho (STY)]TPTASPPR_	-	cyclin binding protein	7.6287	0.0128603		CNAG_00095	-	hypothetical protein	2
LHP1	_DGAASGSQSGLVTAGEEGAQGLQAS[Phospho (STY)]PR_	#N/A	#N/A	7.61998	0.0358499		CNAG_04487	-	transcription regulator	2
CNAG_05510	_RPTFPPDTTDESSVSTPASASAPSSPET[Phospho (STY)]HPIPVSQR_	-	hypothetical protein	7.61613	0.0166422		CNAG_05591	-	hypothetical protein, variant	2
CNAG_04957	_VALGTSPTGGMSMS[Phospho (STY)]VGSPQGERRS[Phospho (STY)]PQGR_	-	hypothetical protein	7.61561	0.0133055		CNAG_07583	-	hypothetical protein	2
CNAG_07925	_PLPEDGEITTS[Phospho (STY)]ENTQAVAAGSASPAAGSGER_	-	nucleoprotein TPR	7.61555	0.0117768		CNAG_05874	-	hypothetical protein	2
CNAG_05465	_TTHHGHTGYLNTLAVS[Phospho (STY)]PDGSLAASGGK_	GIB2	G protein beta subunit Gib2	7.60908	0.0162557		CNAG_00497	-	hypothetical protein	2
CNAG_01833	_[Acetyl (Protein N-term)]SSTTIPPAAVTANSNTLNSALAAEQISS[Phospho (STY)]PAS[Phospho (STY)]PVGKPVDEK_	-	translation initiation factor 4E	7.60623	0.0190881		CNAG_03267	-	splicing factor 3B subunit 2	2
CNAG_00683	_YSRS[Phospho (STY)]PPPLDTMPPR_	-	CMGC/CLK protein kinase	7.60472	0.0392567		CNAG_07941	-	hypothetical protein, variant	2
CNAG_04119	_MAS[Phospho (STY)]DSSVLSSDNATK_	ROM2	rho guanyl-nucleotide exchange factor	7.59459	0.0161687		CNAG_00737	-	hypothetical protein	2
CNAG_07631	_DSPTRNPLST[Phospho (STY)]SPRPGAPQR_	-	hypothetical protein	7.58904	0.029941		CNAG_05499	-	SHO1 osmosensor	2
CNAG_04895	_RTSLNISST[Phospho (STY)]PDHAK_	FZC3	nuclear protein	7.57747	0.0316569		CNAG_03485	-	polyamine transporter 1	2
CNAG_07627	_TSTATVAASEPPTPTSHAHEEDDRS[Phospho (STY)]ATPK_	SMC4	Structural maintenance of chromosomes protein4	7.57518	0.0155831		CNAG_03408	-	hypothetical protein	2
CNAG_01941	_RS[Phospho (STY)]PVMLTS[Phospho (STY)]RTPS[Phospho (STY)]PLAR_	-	glucan synthesis regulatory protein	7.5733	0.0208135		CNAG_02318	-	hypothetical protein	2
CNAG_05510	_RPTFPPDTTDESSVSTPAS[Phospho (STY)]ASAPSSPETHPIPVSQR_	-	hypothetical protein	7.57251	0.0153329		CNAG_02300	-	hypothetical protein	2
CNAG_04289	_EEPVT[Phospho (STY)]PNLK_	-	hypothetical protein	7.57136	0.0112322		CNAG_01728	-	hypothetical protein	2
CNAG_01360	_[Acetyl (Protein N-term)]AQPPPT[Phospho (STY)]APRS[Phospho (STY)]SLSPEKVPHR_	-	pumilio domain-containing protein c	7.56923	0.0400734		CNAG_04786	-	hypothetical protein, variant	2
CNAG_01730	_ST[Phospho (STY)]GSNHSLEAFDSPR_	STE7	STE/STE7/MEK1 protein kinase	7.56003	0.0215991		CNAG_01903	-	hypothetical protein	2
CNAG_05925	_QIPT[Phospho (STY)]PGADR_	CDC3	septin ring protein	7.55988	0.0245683		CNAG_03697	-	hormone-sensitive lipase	2
CNAG_07491	_MHFDEPISPRS[Phospho (STY)]QPSNLPGFESR_	-	glutaredoxin	7.55772	0.0228285		CNAG_01824	-	transmembrane protein, variant	2
CNAG_06166	_KSSPDLS[Phospho (STY)]TSSSAETK_	-	ATP-dependent DNA helicase MPH1	7.55463	0.0166548		CNAG_07483	-	DNA polymerase zeta subunit	2
CNAG_03705	_TVGTS[Phospho (STY)]ENAATVAEETGEKAK_	-	hypothetical protein	7.55456	0.0191028		CNAG_03907	-	LIM domain containing protein	2
CNAG_01298	_APSLPAM[Oxidation (M)]T[Phospho (STY)]PKPLSPITHK_	-	lysophospholipase NTE1	7.54527	0.0113736		CNAG_07485	-	membrane protein, variant	2
CNAG_07605	_GQVAISQTENWDDDFEFSLS[Phospho (STY)]PPK_	-	hypothetical protein	7.54373	0.0227987		CNAG_04163	-	hypothetical protein	2
CNAG_02898	_ELS[Phospho (STY)]PSRR_	-	RNA-binding protein 8A	7.54367	0.0219344		CNAG_02942	-	hypothetical protein	2
CNAG_05222	_EGSY[Phospho (STY)]GLSASAYGGR_	NRG1	transcriptional regulator Nrg1	7.54309	0.0392862		CNAG_04710	-	hypothetical protein	2
CNAG_05141	_YQPVFAPSPS[Phospho (STY)]S[Phospho (STY)]PHSPISPR_	-	hypothetical protein	7.53995	0.037981		CNAG_03613	-	hypothetical protein	2
CNAG_03408	_PTGLPSNLLRPVT[Phospho (STY)]PTSTPAGAK_	-	hypothetical protein	7.53897	0.0127482		CNAG_02788	-	hypothetical protein	2
CNAG_02073	_ELAFFY[Phospho (STY)]SPRPFEDQPPSPR_	MLH1	DNA mismatch repair protein MLH1	7.53477	0.0135697		CNAG_01424	-	hypothetical protein	2
CNAG_00778	_RSGGPSPLS[Phospho (STY)]QGLISATGK_	-	hypothetical protein	7.53007	0.0161894		CNAG_04301	-	hypothetical protein, variant	2
CNAG_03411	_MPPPPSPPITNRPS[Phospho (STY)]VR_	-	hypothetical protein	7.52475	0.011554		CNAG_03152	-	calcium-binding protein	2
CNAG_02568	_QQYTGGGAAPLQQQGT[Phospho (STY)]GGSIGATSAPVPPAR_	-	UBA/TS-N domain-containing protein	7.52046	0.0116411		CNAG_05415	-	hypothetical protein	2
CNAG_03496	_QASQSITTPTYPSQSQYNLY[Phospho (STY)]SPR_	-	hypothetical protein	7.51904	0		CNAG_01261	-	myosin I binding protein	2
CNAG_01454	_HRS[Phospho (STY)]MTPSLPASGR_	STE12alpha	transcription factor STE12	7.51648	0.0283245		CNAG_02468	-	AP-3 complex subunit delta-1	2
CNAG_04487	_NQGGLAVS[Phospho (STY)]GRPSSGPR_	-	transcription regulator	7.51449	0.0194186		CNAG_06166	-	ATP-dependent DNA helicase MPH1	2
CNAG_01183	_SQSQLS[Phospho (STY)]SSVTSYK_	LSB1	hypothetical protein	7.50835	0.0226821		CNAG_00651	-	ATP-binding cassette, subfamily D (ALD), peroxisomal long-chain fatty acid import protein	2
CNAG_05607	_SDTPNFSTNSNSLTNSSAT[Phospho (STY)]LTVPMSGASK_	-	cytoplasmic protein	7.50149	0.0257338		CNAG_00240	-	hypothetical protein	2
KRT71	_KQAS[Phospho (STY)]NLETAIADAEQR_	#N/A	#N/A	7.49794	0.0264287		CNAG_04957	-	hypothetical protein	2
CNAG_01454	_ALTTNLIGGMGSSGHLATGDSHGWPIQSAS[Phospho (STY)]PSLLHR_	STE12alpha	transcription factor STE12	7.49783	0.0162739		CNAG_04289	-	hypothetical protein	2
CNAG_00051	_S[Phospho (STY)]QPATYDRSPLGHGHTDPLTPHGHGR_	SNT1	putative set3c deacetylase complex subunit	7.49703	0.0405365		CNAG_03705	-	hypothetical protein	2
CNAG_01199	_PAAGGFSFGNLGS[Phospho (STY)]KPATPSTTEAPK_	-	nuclear pore complex protein Nup62	7.49566	0.013279		CNAG_03411	-	hypothetical protein	2
CNAG_07599	_LS[Phospho (STY)]SPSSQASFR_	PMS1	DNA mismatch repair protein PMS2	7.49406	0.033823		CNAG_05607	-	cytoplasmic protein	2
CNAG_02464	_LIKT[Phospho (STY)]SSGVTVR_	-	5-oxoprolinase (ATP-hydrolysing)	7.48387	0.0162993		CNAG_00773	-	hypothetical protein	2
CNAG_04198	_VTPLPKPLAPPPKPSPGS[Phospho (STY)]TASAQSGAGR_	-	hypothetical protein	7.48316	0.0266772		CNAG_01790	-	upstream activation factor subunit UAF30	2
CNAG_01454	_HRSMTPS[Phospho (STY)]LPASGR_	STE12alpha	transcription factor STE12	7.48274	0.0109396		CNAG_00066	-	membrane protein	2
CNAG_01115	_STVVVHKPFY[Phospho (STY)]AGDILSDDLK_	-	hypothetical protein	7.48263	0.015788		CNAG_04503	-	hypothetical protein	2
CNAG_02168	_T[Phospho (STY)]IESSSPPPPSSWR_	-	Glucoamylase	7.48225	0.0371704		CNAG_02983	-	hypothetical protein	2
CNAG_00241	_SSLPT[Phospho (STY)]PTHSR_	-	protein AIR1/2	7.47896	0.0191139		CNAG_01006	-	hypothetical protein	2
CNAG_03378	_SPPTSSPY[Phospho (STY)]AR_	CLR2	DNA binding protein, putative	7.47599	0.0109714		CNAG_05919	-	hypothetical protein	2
CNAG_01408	_STSAPVISAQIHQHAPPY[Phospho (STY)]ASANSSLSVAGIPADGK_	-	PH and SEC7 domain-containing protein	7.47424	0.0315008		CNAG_04022	-	translation initiation factor	2
CNAG_04371	_VET[Phospho (STY)]PTPSGTK_	HSV2	WD40 domain-containing protein	7.46476	0.00204255		CNAG_02419	-	hypothetical protein	2
CNAG_05645	_EATSPVS[Phospho (STY)]ELTQPTK_	-	COP9 signalosome complex subunit 3	7.46326	0.0481569		CNAG_06819	-	DNA helicase INO80	2
CNAG_07491	_HFDEPIS[Phospho (STY)]PR_	-	glutaredoxin	7.45904	0.01556		CNAG_01673	-	hypothetical protein, variant	2
CNAG_03117	_NGS[Phospho (STY)]VDKGK_	-	hypothetical protein	7.45691	0.0296548		CNAG_06724	-	DNA repair and recombination protein RAD52	2
CNAG_07522	_LTQPPS[Phospho (STY)]TSR_	-	hypothetical protein	7.44903	0.0415704		CNAG_07717	-	ubiquitin carboxyl-terminal hydrolase 4/11/15	2
CNAG_01251	_VAEASSSTNTAGPSTPVAINKDSSDRSPS[Phospho (STY)]DLISALQANR_	UFD4	E3 ubiquitin-protein ligase TRIP12	7.4477	0.0158608		CNAG_04847	-	hypothetical protein	2
CNAG_05975	_LSS[Phospho (STY)]PVGSPK_	-	ribonuclease Z	7.44342	0.0125266		CNAG_05801	-	hypothetical protein	2
CNAG_04090	_SGPLSPAM[Oxidation (M)]LTGPQGANQS[Phospho (STY)]STSNNLR_	ATF1	activating transcription factor	7.441	0.0174174		CNAG_01345	-	small subunit ribosomal protein S2	2
CNAG_00583	_ADSNISTSAESSPALPPTSFS[Phospho (STY)]VSSPDPPNR_	-	hypothetical protein	7.44033	0.0193053		CNAG_03357	-	hypothetical protein	2
CNAG_00398	_DDSSSKSPSNNMQS[Phospho (STY)]SAPAPALPPR_	-	hypothetical protein	7.44028	0.0369883		CNAG_00406	-	hypothetical protein	2
CNAG_03976	_ISRPPLHVPGT[Phospho (STY)]PGRMSEQGGSDSQIQAIK_	-	hypothetical protein	7.43926	0.0215414		CNAG_01342	-	hypothetical protein	2
CNAG_07319	_AETPT[Phospho (STY)]HEHENPASLSTNPSK_	-	hypothetical protein	7.4362	0.0155495		CNAG_00399	-	transformer-2-beta isoform 3	2
CNAG_01182	_RVNGS[Phospho (STY)]NSEVPASTDFA_	-	cytoplasmic protein	7.43246	0.0260584		CNAG_01376	-	stress response protein NST1, variant	2
CNAG_00773	_NGLILPMDQTFSLGQRDYINSTTHALSSLT[Phospho (STY)]LDHTR_	-	hypothetical protein	7.43135	0.0145686		CNAG_01892	-	hypothetical protein	2
CNAG_02435	_S[Phospho (STY)]LPQSSYDTPVGR_	BWC2	white collar 2 protein	7.42355	0.0270512		CNAG_04500	-	hypothetical protein	2
CNAG_01143	_TT[Phospho (STY)]RGDGYSSPPAGPSNPR_	-	hypothetical protein	7.42156	0.0250988		CNAG_04589	-	hypothetical protein	2
CNAG_03319	_LAASTGAGGAAGAAGGAGGGAKSHS[Phospho (STY)]FSSSEQTVVR_	-	phospholipid binding protein	7.4191	0.0113623		CNAG_07634	-	hypothetical protein	2
CNAG_01261	_AQASRSPS[Phospho (STY)]PPLGAT[Phospho (STY)]HPR_	-	myosin I binding protein	7.41246	0.0345053		CNAG_05391	-	centromere protein C	2
CNAG_05428	_[Acetyl (Protein N-term)]S[Phospho (STY)]QS[Phospho (STY)]PDPSSVKGGAQGQLAPK_	TAF5	transcription initiation factor TFIID subunit 5, variant	7.401	0.0346684		CNAG_06902	-	hypothetical protein	2
CNAG_01446	_SYVEQASDFIS[Phospho (STY)]GKLDSAASAVQPQQEK_	HSP12	heat shock protein, 12Kda	7.40019	0.042486		CNAG_03017	-	transcription initiation factor TFIIF subunit alpha	2
CNAG_05882	_AYAS[Phospho (STY)]PPLPGTQQSQGVEGVTVGMDR_	HSE102	class E vacuolar protein-sorting machinery protein HSE1, variant	7.39421	0.0136536		CNAG_00482	-	26S proteasome regulatory subunit N10	2
CNAG_01790	_EAPAHNLEGSVSPS[Phospho (STY)]AK_	-	upstream activation factor subunit UAF30	7.39249	0.0404238		CNAG_02853	-	amidophosphoribosyltransferase	2
CNAG_00460	_SPLHTSTLT[Phospho (STY)]RPSSPSSNSGAEVVLTPTTM[Oxidation (M)]AEER_	LIV1	virulence related protein of unknown function	7.38761	0.012813		CNAG_06631	-	myosin heavy chain	2
CNAG_07631	_DSPT[Phospho (STY)]RNPLSTSPRPGAPQR_	-	hypothetical protein	7.38612	0.0255935		CNAG_01815	-	hypothetical protein	2
CNAG_01149	_VTS[Phospho (STY)]PAHIS[Phospho (STY)]PTSPK_	-	hypothetical protein	7.38561	0.0268615		CNAG_01362	-	cell cycle control protein cwf19	2
CNAG_04327	_DNGSDAGS[Phospho (STY)]DDEDGEPQVSITISGPATGC[Carbamidomethyl (C)]TDAKDR_	-	hypothetical protein	7.38474	0.0162019		CNAG_01578	-	hypothetical protein	2
CNAG_00066	_TTLGSS[Phospho (STY)]PR_	-	membrane protein	7.38268	0.0149286		CNAG_03608	-	hypothetical protein	2
CNAG_04503	_FSTSSAGSSRPPSPSPNRPETT[Phospho (STY)]PANGK_	-	hypothetical protein	7.38025	0.02503		CNAG_07415	-	hypothetical protein	2
CNAG_01655	_AGAPSTT[Phospho (STY)]QLPK_	-	dynamin GTPase	7.37934	0.0352891		CNAG_01616	-	hypothetical protein	2
CNAG_02293	_SQPT[Phospho (STY)]DAVNSRSPHLSNNR_	-	hypothetical protein	7.37837	0.012289		CNAG_00287	-	cytoplasmic protein	2
CNAG_05284	_SAPSSPAATQTS[Phospho (STY)]PAQPSTRPR_	-	hypothetical protein	7.37768	0.0158918		CNAG_06594	-	oxysterol binding protein	2
CNAG_01988	_PDGSTSPREPANS[Phospho (STY)]AHATHKPQSNPSPPQSVAM[Oxidation (M)]PAVSR_	PHY1	bacteriophytochrome histidine kinase, variant	7.37511	0.0407261		CNAG_02393	-	hypothetical protein	2
CNAG_04774	_TSWGTSPRDLTQT[Phospho (STY)]R_	FZC26	nuclear protein, variant	7.3732	0.0161767		CNAG_05262	-	hypothetical protein	2
CNAG_04303	_VRENTLDDSPS[Phospho (STY)]PSAK_	-	E3 ubiquitin-protein ligase bre1	7.37313	0.0131168		CNAG_02993	-	solute carrier family 39 (zinc transporter), member 7	2
CNAG_05215	_LATLDSTSPHDSEESY[Phospho (STY)]DLVSDQGGKSVR_	-	hypothetical protein	7.36962	0.00960396		CNAG_03659	-	DNA replication regulator DPB11	2
CNAG_03113	_KIHDDDGATS[Phospho (STY)]EDFWTVGNATR_	-	trehalose synthase	7.3672	0.0158939		CNAG_07478	-	hypothetical protein	2
CNAG_04962	_PAETAMEEVTSEDNGDAAT[Phospho (STY)]DAIPQAK_	-	hypothetical protein	7.36557	0.00771171		CNAG_06916	-	hypothetical protein	2
CNAG_06192	_EAPPAYT[Phospho (STY)]PSPAR_	-	hypothetical protein	7.36515	0.0303248		CNAG_07794	-	hypothetical protein	2
CNAG_06647	_SGQSNPVS[Phospho (STY)]PFGSPKLSAVER_	CDC1	hypothetical protein	7.36391	0.0261674		CNAG_01415	-	cytoplasmic protein	2
CNAG_05970	_LPTGAMTPS[Phospho (STY)]R_	PAK1	ste/ste20/paka protein kinase	7.36355	0.0143214		CNAG_07978	-	hypothetical protein	2
CNAG_00193	_NQSSANSPGILHNSGGLS[Phospho (STY)]GFPVSQQQYNNVTFAQPDK_	GAT1	GATA type zinc finger protein asd-4	7.3633	0.0366833		CNAG_01765	-	hypothetical protein, variant	2
CNAG_07562	_TAPS[Phospho (STY)]RSDSSNDLR_	-	hypothetical protein	7.35969	0.0219497		CNAG_03186	-	THO complex subunit 4	2
CNAG_06648	_S[Phospho (STY)]LS[Phospho (STY)]PEPK_	RTF1	RNA polymerase-associated protein RTF1	7.34731	0.0143747		CNAG_01330	-	hypothetical protein	2
CNAG_00661	_AGTVQPDADNSTHGEEGSQWS[Phospho (STY)]K_	-	hypothetical protein	7.34396	0		CNAG_00818	-	hypothetical protein	2
CNAG_05422	_TPGTVS[Phospho (STY)]PPTDIQPATELVRR_	LIV11	virulence related protein of unknown function	7.33972	0.0132299		CNAG_00817	-	hypothetical protein	2
CNAG_02983	_KSSATTLS[Phospho (STY)]DLEAELGTPHGSMEEKTEGEVEGLK_	-	hypothetical protein	7.33127	0.0136585		CNAG_01354	-	hypothetical protein	2
CNAG_06401	_LGNIASPSS[Phospho (STY)]PRK_	RIC8	RIC8 guanine nucleotide exchange factor	7.33073	0.0253106		CNAG_02912	-	hypothetical protein	2
CNAG_01926	_WNDAMVNGLKSS[Phospho (STY)]PSMSQAPSR_	PEX5	peroxisome targeting signal receptor	7.3303	0.0357577		CNAG_03729	-	peroxin-5, variant	2
CNAG_06897	_T[Phospho (STY)]PTPPAYC[Carbamidomethyl (C)]SSSSAMSSPR_	-	hypothetical protein	7.32995	0.0399911		CNAG_07665	-	hypothetical protein	2
CNAG_01006	_ETSSHPSPSEMAANFASRPS[Phospho (STY)]QR_	-	hypothetical protein	7.32916	0.0163051		CNAG_02962	-	CMGC/DYRK/PRP4 protein kinase	2
CNAG_00879	_VLAES[Phospho (STY)]GAHIS[Phospho (STY)]RPGSDLSSNR_	-	Glutamate dehydrogenase	7.32784	0.0429683		CNAG_01258	-	hypothetical protein	2
CNAG_03818	_TRSTPS[Phospho (STY)]LR_	SSK1	osomolarity two-component system, response regulator SSK1	7.32745	0.0111366		CNAG_00311	-	3-hydroxyisobutyryl-CoA hydrolase	2
CNAG_03815	_NDSEETLS[Phospho (STY)]PSASR_	-	hypothetical protein	7.32492	0.0264558		CNAG_03677	-	hypothetical protein	2
CNAG_05919	_TMARS[Phospho (STY)]PSDQSDILTPR_	-	hypothetical protein	7.32266	0.0254388		CNAG_06178	-	hypothetical protein	2
CNAG_04433	_FLISSPVPLAPAKHPY[Phospho (STY)]HASTASTSR_	YAK103	CMGC/DYRK/DYRK2 protein kinase	7.3222	0.0264321		CNAG_07329	-	hypothetical protein	2
CNAG_00317	_MAHALPIRPSVPDGIDISTSAS[Phospho (STY)]PK_	-	hypothetical protein	7.32028	0.0138258		CNAG_00547	-	hypothetical protein	2
CNAG_01820	_ILS[Phospho (STY)]VPSDPADLDLHSIERD_	PYK1	pyruvate kinase, variant	7.31855	0.0155771		CNAG_03903	-	hypothetical protein	2
CNAG_00569	_ALS[Phospho (STY)]PQAQAAYDR_	-	GTP cyclohydrolase II	7.31745	0.0214151		CNAG_04227	-	hypothetical protein	2
CNAG_07631	_DSPTRNPLS[Phospho (STY)]TSPRPGAPQR_	-	hypothetical protein	7.3171	0.0464402		CNAG_02328	-	pre-rRNA-processing protein TSR1	2
CNAG_03763	_YVPSGLSSFAPSASPT[Phospho (STY)]EPPAPSNGGGK_	-	IQ domain-containing GTPase activating protein	7.31652	0.038182		CNAG_07735	-	U3 small nucleolar RNA-associated protein 25	2
CNAG_04271	_S[Phospho (STY)]SSPNSAYR_	-	hypothetical protein	7.31231	0.0242877		CNAG_05537	-	DNA repair protein rad18	2
CNAG_03655	_SVPTS[Phospho (STY)]PVNK_	-	hypothetical protein, variant	7.30604	0.0164597		CNAG_06403	-	hypothetical protein	2
CUF1	_HSGHEFENPAS[Phospho (STY)]AGAT[Phospho (STY)]PPGGGC[Carbamidomethyl (C)]C[Carbamidomethyl (C)]GSSVHSR_	#N/A	#N/A	7.30557	0.0214418		CNAG_04010	-	GTP cyclohydrolase I	2
CNAG_03768	_VQPIGMT[Phospho (STY)]HTTQNSGSPAPSR_	FZC32	hypothetical protein, variant	7.30323	0.0161831		CNAG_04993	-	hypothetical protein	2
CNAG_05940	_RPEGTIEEGNEMLGLGGSTEEDGDEQGPQNVS[Phospho (STY)]PENENTVNPTLFPANRR_	ZFC3	hypothetical protein	7.30086	0.0212943		CNAG_06567	-	hypothetical protein	2
CNAG_06134	_[Acetyl (Protein N-term)]ATAVAS[Phospho (STY)]PSSFSPIPSTSK_	BZP1	hypothetical protein	7.29331	0.0296358		CNAG_04152	-	protein phosphatase methylesterase 1	2
CNAG_01897	_[Acetyl (Protein N-term)]SEATETPIPPPSNVTEPPRSPNPLNPAT[Phospho (STY)]DAQGENIQPPVER_	BDF1	bromodomain-containing factor 1	7.29245	0.0182605		CNAG_02051	-	kinesin family member 20/23	2
CNAG_04233	_STPSLLSDNVT[Phospho (STY)]VPGPSR_	-	hypothetical protein	7.29225	0.015607		CNAG_01961	-	MSP domain-containing protein	2
CNAG_02064	_INPS[Phospho (STY)]DKVVK_	-	TATA-box-binding protein-associated factor	7.29142	0.0145799		CNAG_02683	-	hypothetical protein	2
CNAG_02412	_[Acetyl (Protein N-term)]S[Phospho (STY)]AEPSSSIR_	-	rRNA-processing protein CGR1	7.29102	0.00174545		CNAG_02530	-	hypothetical protein	2
CNAG_03425	_LGPSITSS[Phospho (STY)]PAHRDGNVSIPS[Phospho (STY)]PVGMAR_	-	hypothetical protein	7.28093	0.0088		CNAG_02721	-	leucine repeat containing protein	2
CNAG_02515	_SPSPISPISPS[Phospho (STY)]LHKPFLSPK_	-	hypothetical protein	7.28017	0.0146022		CNAG_02080	-	hypothetical protein	2
CNAG_04022	_RPLFSPFDSDPPLT[Phospho (STY)]AASAFSAQPSSHR_	-	translation initiation factor	7.2797	0.011321		CNAG_01985	-	hypothetical protein	2
CNAG_06597	_AQLSSVSLRPVGFPSS[Phospho (STY)]PTPSPR_	SPT8	transcriptional activator SPT8	7.27813	0.0303642		CNAG_05167	-	hypothetical protein	2
CNAG_04708	_PAKPS[Phospho (STY)]PHAALPR_	-	hypothetical protein	7.27812	0.0206651		CNAG_05733	-	cytoplasmic protein	2
CNAG_02432	_HS[Phospho (STY)]PVS[Phospho (STY)]PNASNLSSFFHRPNFSAPR_	-	hypothetical protein, variant	7.27692	0.0227768		CNAG_03942	-	THO complex subunit 2	2
CNAG_06603	_APSS[Phospho (STY)]PILSPS[Phospho (STY)]RSPLSGGR_	DUG2	di- and tripeptidase	7.27153	0.0112441		CNAG_05819	-	hypothetical protein	2
CNAG_04758	_IDSRPQLTS[Phospho (STY)]GDVIAEVAPSNGHESSTTEKVDPHATGNAAAGGGR_	AMT2	amt family ammonium transporter	7.27036	0.016249		CNAG_04602	-	hypothetical protein	2
CNAG_03727	_GS[Phospho (STY)]VSVDPGR_	-	hypothetical protein	7.27035	0.0112978		CNAG_03136	-	hypothetical protein	2
CNAG_03886	_AAPSPT[Phospho (STY)]PSVQGSEAGK_	-	hypothetical protein	7.26741	0.0345201		CNAG_06279	-	transportin-3	2
CNAG_01207	_KIVS[Phospho (STY)]PIASSPPNSASLSVDR_	-	hypothetical protein	7.26603	0		CNAG_04528	-	hypothetical protein	2
CNAG_07411	_IDRTGTPIQSAAGPAAT[Phospho (STY)]SFVPHTIQK_	RUM1alpha	histone demethylase JARID1	7.26566	0.0242471		CNAG_02445	-	Phosphoacetylglucosamine mutase	2
CNAG_03425	_LGPSITSSPAHRDGNVS[Phospho (STY)]IPS[Phospho (STY)]PVGMAR_	-	hypothetical protein	7.26267	0.0242576		CNAG_07333	-	ubiquitin carboxyl-terminal hydrolase 25/28	2
CNAG_07375	_ERESDYPT[Phospho (STY)]SEEDLSDDGELEPDATSSR_	-	guanyl-nucleotide exchange factor	7.2543	0.00897727		CNAG_02395	-	ubiquitin carboxyl-terminal hydrolase 9/13	2
CNAG_03117	_MPPISS[Phospho (STY)]PSTSPHNLSSR_	-	hypothetical protein	7.254	0.0245761		CNAG_00753	-	hypothetical protein	2
CNAG_06301	_HSYLGPGAGIS[Phospho (STY)]GSVPGGGGVAINK_	SCH9	AGC/AKT protein kinase	7.24986	0.029678		CNAG_01448	-	hypothetical protein	2
CNAG_05773	_VYVHSPDGTHS[Phospho (STY)]KSER_	MET30	F-box and WD-40 domain-containing protein MET30	7.24957	0.0434675		CNAG_00860	-	hypothetical protein	2
CNAG_01183	_TVTS[Phospho (STY)]PPTPAAR_	LSB1	hypothetical protein	7.24689	0.0234146		CNAG_00564	-	hypothetical protein	2
CNAG_07477	_SVSHHRPESPVTQGLY[Phospho (STY)]TR_	-	hypothetical protein, variant	7.24558	0.0223234		CNAG_06687	-	hypothetical protein	2
CNAG_01941	_SPHS[Phospho (STY)]PLS[Phospho (STY)]PHSVSFHSPHSPYSSR_	-	glucan synthesis regulatory protein	7.24438	0.00741538		CNAG_06837	-	PH domain-containing protein	2
CNAG_00039	_HS[Phospho (STY)]NTQPTTPDTTGQPEVR_	ZFC6	hypothetical protein	7.23387	0.0242555		CNAG_06608	-	hypothetical protein	2
CNAG_02071	_AATPLYPGPITNATNTRPS[Phospho (STY)]PLSNSTTPETVEK_	BNI4	putative scaffold protein	7.23376	0.0127198		CNAG_02009	-	extensin	2
CNAG_02167	_NHSHFTPS[Phospho (STY)]EPPLVHGTVEDEDEQMR_	VPS27	vacuolar protein sorting-associated protein 27	7.23324	0.00946341		CNAG_01477	-	Serine palmitoyltransferase	2
CNAG_02419	_VPS[Phospho (STY)]MNGPPR_	-	hypothetical protein	7.23168	0.011503		CNAG_06317	-	hypothetical protein	2
CNAG_07815	_NHPPSSPT[Phospho (STY)]FDGT[Phospho (STY)]GPSGLEETVPFR_	-	hypothetical protein	7.23063	0.0117296		CNAG_04265	-	hypothetical protein	2
CNAG_00148	_IPSYGYAS[Phospho (STY)]GR_	-	hypothetical protein	7.22799	0.0183397		CNAG_04862	-	glutamate synthase (NADPH/NADH), variant	2
CNAG_01809	_ASPAVAPAPVLNPY[Phospho (STY)]AAGSAANSPAPDEER_	-	U4/U6 small nuclear ribonucleoprotein Prp3	7.22787	0.0423151		CNAG_02118	-	hypothetical protein	2
CNAG_01591	_ASSMGGNLQPPQLGVSS[Phospho (STY)]PFAQSR_	-	hypothetical protein	7.22328	0.0349113		CNAG_06928	-	hypothetical protein	2
CNAG_01182	_ADSSPADNLSPKAVQEQLPS[Phospho (STY)]PDAQGAEHQLSLR_	-	cytoplasmic protein	7.22294	0.025904		CNAG_02856	-	potassium ion transporter	2
CNAG_02877	_FFMTEPTTGLT[Phospho (STY)]PAGEKLNEIDNLPIVTPRPGMGK_	FZC51	hypothetical protein	7.22194	0.0282798		CNAG_04696	-	DNA clamp loader	2
CNAG_06828	_SISISRNS[Phospho (STY)]PNINS[Phospho (STY)]GGT[Phospho (STY)]PPVPNIPSR_	-	solute carrier family 36 (proton-coupled amino acid transporter)	7.22169	0.0143091		CNAG_02533	-	hypothetical protein	2
CNAG_00667	_IGS[Phospho (STY)]GQGFNSHNKESAAK_	-	hypothetical protein	7.21927	0.020284		CNAG_06550	-	nucleoporin family protein	2
CNAG_07491	_MHFDEPIS[Phospho (STY)]PRSQPSNLPGFESR_	-	glutaredoxin	7.21718	0.0208934		CNAG_00368	-	vacuolar-sorting protein 53 long isoform	2
CNAG_06819	_HPNASKS[Phospho (STY)]PVALMDR_	-	DNA helicase INO80	7.21055	0.0313888		CNAG_05695	-	glucosamine 6-phosphate N-acetyltransferase	2
CNAG_01555	_SFIC[Carbamidomethyl (C)]S[Phospho (STY)]NSPSSSR_	-	hypothetical protein	7.21043	0.0224043		CNAG_03756	-	hypothetical protein, variant	2
CNAG_03815	_ASDS[Phospho (STY)]PITTS[Phospho (STY)]IRSPFADPSPPLPAAIDR_	-	hypothetical protein	7.20993	0.0159511		CNAG_01015	-	cytoplasmic protein	2
CNAG_04243	_SGRTTPS[Phospho (STY)]ILGHHPYAYSGQPSASR_	CDC24	cell division control protein 24	7.20539	0.0373879		CNAG_07514	-	Sec7 domain-containing protein	2
CNAG_01938	_RESLTASPS[Phospho (STY)]MPMQEHR_	KIN1	CAMK/CAMKL/KIN1 protein kinase	7.20436	0.0132706		CNAG_03450	-	ATP-binding cassette transporter	2
CNAG_06697	_SAS[Phospho (STY)]PPYR_	MPS1	TTK protein kinase, variant	7.20106	0.020488		CNAG_02997	-	protein STU1	2
CNAG_01168	_SEAVT[Phospho (STY)]PK_	-	H/ACA ribonucleoprotein complex subunit 4	7.19402	0.0460552		CNAG_04609	AGO1	argonaute	2
CNAG_03425	_LGPSIT[Phospho (STY)]SSPAHR_	-	hypothetical protein	7.19386	0.0160099		CNAG_04758	AMT2	amt family ammonium transporter	2
CNAG_04586	_RPSIPSAAQLISSGPFTPPRVVT[Phospho (STY)]NQHQTAAQSK_	HOB7	LIM-homeobox protein, variant	7.19362	0.0130425		CNAG_06469	APT1	Phospholipid-translocating ATPase APT1	2
CNAG_01673	_AVSADAGLSPGPS[Phospho (STY)]R_	-	hypothetical protein, variant	7.19242	0.0280954		CNAG_01742	AQY1	aquaporin-associated protein	2
CNAG_06158	_TTFGPEDEPNS[Phospho (STY)]PMSRFS[Phospho (STY)]FR_	-	hypothetical protein	7.19129	0.0223438		CNAG_06732	ATG2	hypothetical protein	2
CNAG_05510	_RPTFPPDTTDESSVSTPASASAPSS[Phospho (STY)]PETHPIPVSQR_	-	hypothetical protein	7.19104	0.0319224		CNAG_07433	BND1	hypothetical protein	2
CNAG_06724	_SMS[Phospho (STY)]PTKEASNLGPELNETR_	-	DNA repair and recombination protein RAD52	7.18804	0		CNAG_03184	BUB1	BUB protein kinase	2
CNAG_00396	_ANSQAQQAY[Phospho (STY)]SSQDHSPMEGIQSDSTHIQQPMATQK_	PKA1	AGC/PKA protein kinase	7.18736	0.022022		CNAG_05181	BWC1	white collar 1 protein	2
CNAG_05599	_ST[Phospho (STY)]PLGDLR_	-	hypothetical protein	7.18503	0.0215107		CNAG_02435	BWC2	white collar 2 protein	2
CNAG_06884	_GKMT[Phospho (STY)]PEGSEDGDKPR_	-	hypothetical protein	7.18378	0.0308567		CNAG_06134	BZP1	hypothetical protein	2
CNAG_02000	_GLGLT[Phospho (STY)]VAQALLES[Phospho (STY)]GS[Phospho (STY)]NVVC[Carbamidomethyl (C)]LDLLPEPSEPQWSNAAK_	-	Short-chain dehydrogenase	7.18335	0.0136677		CNAG_00718	CAC2	chromatin assembly factor 1 subunit B	2
CNAG_00777	_TANSAFT[Phospho (STY)]VVGLGGAGGSGDR_	-	CCR4-NOT transcriptional complex subunit CAF120	7.18158	0.0372207		CNAG_01557	CAM1	Calmodulin	2
CNAG_06599	_LAQSYHPS[Phospho (STY)]PTPK_	-	hypothetical protein	7.17869	0.0408483		CNAG_06576	CAR1	cAMP-regulated gene 1	2
CNAG_02822	_HSHSIPEIGES[Phospho (STY)]K_	-	hypothetical protein	7.17804	0.0163664		CNAG_04243	CDC24	cell division control protein 24	2
CNAG_01130	_KPS[Phospho (STY)]FSGGKPWTGNR_	-	hypothetical protein	7.17781	0.0289522		CNAG_02671	CEF1	pre-mRNA-splicing factor cef1	2
CNAG_01941	_SPS[Phospho (STY)]FETR_	-	glucan synthesis regulatory protein	7.17703	0.0387664		CNAG_02959	CFT2	high-affinity iron transporter	2
CNAG_01173	_RPSFASSPLRNPSFS[Phospho (STY)]PLS[Phospho (STY)]PSASDTDSIIK_	LAG1	LAG1 family transcription factor, putative	7.1745	0.0191625		CNAG_05301	CRN1	Coronin-like protein CRN1, putative	2
CNAG_03319	_ASQNLGVGASPARPS[Phospho (STY)]RDMR_	-	phospholipid binding protein	7.17272	0.0198399		CNAG_01640	CSF1	Cold sensitive for fermentation protein 1, putative	2
CNAG_07717	_AAS[Phospho (STY)]EDPFPSSSDSGR_	-	ubiquitin carboxyl-terminal hydrolase 4/11/15	7.16995	0.0440677		CNAG_02138	DNA2	DNA replication ATP-dependent helicase dna2	2
CNAG_04398	_STQS[Phospho (STY)]PNGSQTVRLPR_	ARO80	specific RNA polymerase II transcription factor	7.168	0.0154096		CNAG_04774	FZC26	nuclear protein, variant	2
CNAG_01149	_LHY[Phospho (STY)]SSQASDQAQS[Phospho (STY)]PVQPSLPSR_	-	hypothetical protein	7.16506	0.0205015		CNAG_04895	FZC3	nuclear protein	2
CNAG_03245	_S[Phospho (STY)]GSIPSM[Oxidation (M)]EASGEALKGETVVIVLGASGDLAK_	ZWF1	glucose-6-phosphate dehydrogenase	7.16441	0.0129343		CNAG_05153	GAT5	hypothetical protein	2
CNAG_00393	_IY[Phospho (STY)]EAHVGISSPNMR_	-	1,4-alpha-glucan-branching enzyme	7.16354	0.0280561		CNAG_05465	GIB2	G protein beta subunit Gib2	2
CNAG_06896	_S[Phospho (STY)]SGNIREMGR_	-	cytoplasmic protein	7.15752	0.0204833		CNAG_05186	GRF1	hypothetical protein	2
CNAG_04478	_SPTGLPASSS[Phospho (STY)]ER_	-	hypothetical protein	7.15736	0.00688571		CNAG_06698	HAD9	phosphatase	2
CNAG_00257	_FAMSEISSGFNT[Phospho (STY)]GPVTTPPC[Carbamidomethyl (C)]ER_	-	kinesin family member 21A, variant	7.15568	0.0473943		CNAG_01242	HAPX	CCAAT-binding transcription factor HapX	2
CNAG_07631	_MT[Phospho (STY)]PNELEPMSR_	-	hypothetical protein	7.15515	0.0142609		CNAG_03527	HEL2	cytoplasmic protein	2
CNAG_05767	_GSSGTYDYPGPLGS[Phospho (STY)]PVTS[Phospho (STY)]PAVGTEER_	-	hypothetical protein, variant	7.15494	0.0138675		CNAG_01431	HOB1	hypothetical protein	2
CNAG_01020	_AAPVSPAS[Phospho (STY)]SR_	-	hypothetical protein	7.15363	0.0157346		CNAG_05882	HSE102	class E vacuolar protein-sorting machinery protein HSE1, variant	2
CNAG_03348	_LDMEAGAPPGQPGAAQT[Phospho (STY)]PR_	-	hypothetical protein	7.15246	0.0242744		CNAG_04371	HSV2	WD40 domain-containing protein	2
CNAG_03768	_VQPIGMTHTTQNSGSPAPS[Phospho (STY)]RFPAALEEASR_	FZC32	hypothetical protein, variant	7.14945	0.0277535		CNAG_05480	HXK1	hexokinase, variant	2
CNAG_05745	_STTSSPFPALS[Phospho (STY)]ANPSSASPTTTTHPTLSYSR_	-	cytoplasmic protein	7.14821	0.0415913		CNAG_03438	HXT1	hexose transporter	2
CNAG_01298	_APSLPAM[Oxidation (M)]TPKPLS[Phospho (STY)]PITHK_	-	lysophospholipase NTE1	7.14811	0.015945		CNAG_00441	IMD1	inosine-5'-monophosphate dehydrogenase	2
CLR4	_TLSSGTGQST[Phospho (STY)]PSKFSLPTSDVASNQK_	#N/A	#N/A	7.14783	0.0285305		CNAG_01173	LAG1	LAG1 family transcription factor, putative	2
CNAG_06599	_LAQSYHPSPT[Phospho (STY)]PK_	-	hypothetical protein	7.1377	0.0166104		CNAG_05422	LIV11	virulence related protein of unknown function	2
CNAG_07562	_PSLSQSISQQSFSFSAHDRAS[Phospho (STY)]PTPLQAYMSR_	-	hypothetical protein	7.13741	0.0211605		CNAG_06223	MIZ1	E3 SUMO-protein ligase PIAS1	2
CNAG_04847	_QDEDPIRPVS[Phospho (STY)]TPTNASSMSR_	-	hypothetical protein	7.13718	0.0151122		CNAG_02073	MLH1	DNA mismatch repair protein MLH1	2
CNAG_03819	_FWEKKST[Phospho (STY)]DDSDTHR_	ERG6	sterol 24-C-methyltransferase	7.13251	0.0127784		CNAG_02995	MS1	RNA-binding protein with serine-rich domain 1	2
CNAG_04397	_TTPVPPALVPERDPFSPDS[Phospho (STY)]R_	-	hypothetical protein	7.13079	0.00954357		CNAG_01916	MSH6	DNA mismatch repair protein msh6	2
CNAG_05801	_GDSKPSSSAGPST[Phospho (STY)]PTPAAAGNSNDRPEEVSQALAR_	-	hypothetical protein	7.12719	0.0303208		CNAG_00286	NAB2	putative nuclear polyadenylated mRNA-binding protein	2
CNAG_01345	_STLSVY[Phospho (STY)]IPEGSTAVPK_	-	small subunit ribosomal protein S2	7.12505	0.0158699		CNAG_05970	PAK1	ste/ste20/paka protein kinase	2
CNAG_02994	_ATGVDLTHSS[Phospho (STY)]PLS[Phospho (STY)]VEEAR_	-	hypothetical protein, variant	7.12023	0.00838261		CNAG_07470	PDE2	high-affinity phosphodiesterase	2
CNAG_03357	_AAAAEFPPPS[Phospho (STY)]SPPRK_	-	hypothetical protein	7.11866	0.0158359		CNAG_01926	PEX5	peroxisome targeting signal receptor	2
CNAG_01492	_GRST[Phospho (STY)]IFVDTSTVYPTTAGR_	-	hypothetical protein	7.11776	0.0158004		CNAG_07532	PHO23	hypothetical protein	2
CNAG_01282	_SFQFGRS[Phospho (STY)]SLDLPDSVGISSSLPTTPSGQGVK_	-	hypothetical protein	7.11731	0.0381341		CNAG_04162	PKA2	AGC/PKA protein kinase	2
CNAG_07571	_PAGGVWSPS[Phospho (STY)]TR_	-	hypothetical protein	7.11704	0.035353		CNAG_07599	PMS1	DNA mismatch repair protein PMS2	2
CNAG_04991	_STVLPADLGS[Phospho (STY)]APSHTLGLLHSYASAFSVR_	-	hypothetical protein	7.11447	0.0051		CNAG_06607	POL1	DNA polymerase alpha subunit A	2
CNAG_00051	_TSGPNGVPSLNLAAAQSLSAQPS[Phospho (STY)]PTFSK_	SNT1	putative set3c deacetylase complex subunit	7.11047	0.0228273		CNAG_05386	PRO1	glutamate 5-kinase, variant	2
CNAG_01208	_RITPT[Phospho (STY)]EIIPPTSFSPSAR_	CCH1	calcium-channel protein CCH1	7.11024	0.0345349		CNAG_02810	PUF4	pumilio-family RNA binding protein, variant	2
CNAG_06828	_GDS[Phospho (STY)]GTSTLR_	-	solute carrier family 36 (proton-coupled amino acid transporter)	7.10901	0.0352781		CNAG_03024	RIM15	AGC protein kinase, variant	2
CNAG_03645	_ASLLAGGNHVDESDIGT[Phospho (STY)]PGSVTASGNK_	WDP3	NET1-associated nuclear protein 1 (U3 small nucleolar RNA-associated protein 17), variant	7.10332	0.0254545		CNAG_02134	RSC8	rsc chromatin remodeling complex subunit	2
CNAG_01587	_ESIEY[Phospho (STY)]DDDDGFIVSDS[Phospho (STY)]DEDDYPSK_	-	RNA polymerase-associated protein LEO1	7.10225	0.00708824		CNAG_03188	SET202	histone-lysine N-methyltransferase, H3 lysine-36 specific	2
CNAG_04697	_VRHS[Phospho (STY)]MDSSRPMSGTSYSR_	-	zinc finger protein	7.09847	0.0205227		CNAG_06591	SET302	histone deacetylase complex subunit, putative	2
CNAG_04040	_ELVQT[Phospho (STY)]TSSPSPSGGGAGGVSGHSSSAMPIPGSVR_	FPK1	AGC/RSK protein kinase, variant	7.09772	0.0487239		CNAG_05549	SGV1	CMGC/CDK protein kinase	2
CNAG_06490	_S[Phospho (STY)]PSMNMLQR_	SNF102	CAMK/CAMKL protein kinase	7.09468	0.0166275		CNAG_03409	SKN7	osomolarity two-component system, response regulator SKN7	2
CNAG_05349	_GFELIQSESRPTGTDS[Phospho (STY)]PSISEPGSIATSATAR_	-	hypothetical protein	7.08786	0.0474492		CNAG_07627	SMC4	Structural maintenance of chromosomes protein4	2
CNAG_03115	_YLSPT[Phospho (STY)]LDTQSAWVADVNQR_	FZC46	hypothetical protein	7.08574	0.0139869		CNAG_01730	STE7	STE/STE7/MEK1 protein kinase	2
CNAG_06363	_DQTATS[Phospho (STY)]VPSTSAGPSR_	-	Nucleolar protein	7.0829	0.0303538		CNAG_05590	TCO2	Two-component-like sensor kinase	2
CNAG_06828	_S[Phospho (STY)]ISIS[Phospho (STY)]RNSPNINSGGT[Phospho (STY)]PPVPNIPSR_	-	solute carrier family 36 (proton-coupled amino acid transporter)	7.08259	0.0217611		CNAG_04190	TOP1	DNA topoisomerase I	2
CNAG_03989	_SASVSLGSIGSDRSSETS[Phospho (STY)]LSASIVK_	-	hypothetical protein	7.07896	0.0133688		CNAG_00377	TOP2	DNA topoisomerase II, variant	2
CNAG_03553	_RVSSGTPPTT[Phospho (STY)]R_	-	hypothetical protein	7.07562	0.0428363		CNAG_05292	TPS1	alpha,alpha-trehalose-phosphate synthase (UDP- forming)	2
CNAG_01360	_GNPQPGKS[Phospho (STY)]PR_	-	pumilio domain-containing protein c	7.07506	0.0111328		CNAG_03872	UBP7	putative ubiquitin carboxyl-terminal hydrolase	2
CNAG_00406	_ET[Phospho (STY)]LDEGPSYMLTIPPATASR_	-	hypothetical protein	7.07363	0.0193042		CNAG_01251	UFD4	E3 ubiquitin-protein ligase TRIP12	2
CNAG_00506	_LITAVPIPGS[Phospho (STY)]PASPKSTTPPPSFSR_	-	hypothetical protein	7.0717	0.0299775		CNAG_05420	USV101	Nutrient and stress factor 1, putative	2
CNAG_02168	_RKPLIELEPAAPATPQS[Phospho (STY)]MTTPR_	-	Glucoamylase	7.07108	0.0379737		CNAG_03213	UVE1	UV damage endonuclease UvdE	2
CNAG_01062	_TGSITAS[Phospho (STY)]PEPS[Phospho (STY)]PVAS[Phospho (STY)]HSASPIIAPR_	PSK201	CAMK/CAMKL/PASK protein kinase	7.0698	0.0381158		CNAG_03322	UXS1	UDP-glucuronate decarboxylase	2
CNAG_05272	_TRS[Phospho (STY)]AQPGDISIAR_	-	hypothetical protein, variant	7.06906	0.0430724		CNAG_01720	VPS23	ESCRT-I complex subunit TSG101	2
CNAG_00348	_RIHSFVSDLSPAS[Phospho (STY)]RR_	-	hypothetical protein	7.06557	0.0415802		CNAG_00248	VPS36	ESCRT-II complex subunit VPS36	2
CNAG_01916	_GS[Phospho (STY)]ESNSFLTAAER_	MSH6	DNA mismatch repair protein msh6	7.0651	0.0163343		CNAG_03645	WDP3	NET1-associated nuclear protein 1 (U3 small nucleolar RNA-associated protein 17), variant	2
CNAG_04361	_ASVLSDNSSVT[Phospho (STY)]SKEGK_	-	hypothetical protein	7.06317	0.0269447		CNAG_04197	YAK1	CMGC/DYRK/YAK protein kinase	2
CNAG_04832	_ETT[Phospho (STY)]LRQSIDQTPQPK_	-	RalA-binding protein 1	7.06219	0.0155652		CNAG_00390	YMR1	myotubularin	2
CNAG_01342	_SAFGFTNASDSRS[Phospho (STY)]PANSYSPLNSAFK_	-	hypothetical protein	7.05789	0.0156198		CNAG_05791	ZDS3	zds-like protein	2
CNAG_03763	_YVPSGLSSFAPSAS[Phospho (STY)]PTEPPAPSNGGGK_	-	IQ domain-containing GTPase activating protein	7.05781	0.0218589		CNAG_01973	ZFC2	C2H2 zinc finger protein Zas1A	2
CNAG_00285	_SALY[Phospho (STY)]GWFSPPPSSMDAGGSKR_	-	hypothetical protein	7.05779	0.0133841		HAD1	HAD1	#N/A	2
CNAG_00294	_NLEDEPEQRETPRPADT[Phospho (STY)]DAGSLPPSQSR_	-	splicing factor 45	7.05544	0.015589		CUF1	CUF1	#N/A	2
CNAG_05343	_LPISSPAST[Phospho (STY)]K_	-	hypothetical protein	7.04434	0.0111928		CHS5	CHS5	#N/A	2
CNAG_01023	_RATT[Phospho (STY)]ELLTPPPPTPPQESISDLTPR_	SCC1	cohesin complex subunit SCC1	7.04213	0.0385612		CNA1	CNA1	#N/A	2
CNAG_07517	_SPIAPPPHHGMPSAATNLTPSATIGS[Phospho (STY)]SEGSTAEPK_	-	hypothetical protein	7.04199	0.0256751		CSN1S1	CSN1S1	#N/A	2
CNAG_01720	_HLADVFSAAPPVYAKPST[Phospho (STY)]PSQNQNLSSGAR_	VPS23	ESCRT-I complex subunit TSG101	7.04018	0.0358795		PAN2	PAN2	#N/A	2
CNAG_06060	_RTASDLSESDVGGAGVS[Phospho (STY)]GATGASGATGAR_	-	hypothetical protein	7.03958	0.0141236		yap1	yap1	#N/A	2
CNAG_03655	_GVMAESQFANLPPLPPPPATPT[Phospho (STY)]AAGDTTPTKK_	-	hypothetical protein, variant	7.0377	0.0200649		YAF9	YAF9	#N/A	2
CNAG_02810	_TSPTAGM[Oxidation (M)]ADSIASLPAM[Oxidation (M)]PSKS[Phospho (STY)]VPGTPFGFGGAGGGGAGVGK_	PUF4	pumilio-family RNA binding protein, variant	7.03743	0.0111213		CRZ1	CRZ1	#N/A	2
CNAG_04361	_SDLSALASTY[Phospho (STY)]NSHALHDPPQSSR_	-	hypothetical protein	7.03214	0.0177338		TPS2	TPS2	#N/A	2
CNAG_03818	_MDPFDTFDPVSSSS[Phospho (STY)]EDDPVPQESR_	SSK1	osomolarity two-component system, response regulator SSK1	7.03123	0.0381948		PBP1	PBP1	#N/A	2
CNAG_01060	_SRS[Phospho (STY)]PARAPER_	-	hypothetical protein	7.03013	0.0110921		TIF32	TIF32	#N/A	2
CNAG_01130	_VSQPIEEDAQSVT[Phospho (STY)]MESESDSDTVLVSR_	-	hypothetical protein	7.02864	0.0323631		CHS3	CHS3	#N/A	2
CNAG_03836	_SASAAPTFT[Phospho (STY)]SSQAELPR_	-	hypothetical protein, variant	7.02848	0.0266199		CNAG_07951	0	WD-repeat protein JIP5	1
CNAG_00399	_RIS[Phospho (STY)]LS[Phospho (STY)]PR_	-	transformer-2-beta isoform 3	7.02652	0.0436477		CNAG_05685	-	neutral amino acid transporter	1
CNAG_01149	_S[Phospho (STY)]RS[Phospho (STY)]PGEGT[Phospho (STY)]FEEKS[Phospho (STY)]SEEGMTMPSQSAGYQAR_	-	hypothetical protein	7.02482	0.0164994		CNAG_06616	-	hypothetical protein	1
CNAG_03886	_FAQGATVSS[Phospho (STY)]SSPR_	-	hypothetical protein	7.02335	0.013696		CNAG_00588	-	hypothetical protein	1
CNAG_06698	_EVEKFEQSILAFADT[Phospho (STY)]PPR_	HAD9	phosphatase	7.02172	0.0434101		CNAG_01334	-	hypothetical protein	1
CNAG_05233	_QT[Phospho (STY)]PIQVQHPTR_	-	hypothetical protein	7.02157	0.0155633		CNAG_00774	-	phosphoglycerate dehydrogenase	1
CNAG_05830	_VFMLEHGQQTQT[Phospho (STY)]PTSEGEVFR_	-	cytoplasmic protein, variant	7.02088	0.0143163		CNAG_05776	-	hypothetical protein	1
CNAG_05420	_KAQAAAAQAAAANGHSQQNS[Phospho (STY)]PYAQYHESQWNAPPHPR_	USV101	Nutrient and stress factor 1, putative	7.01966	0.039074		CNAG_05531	-	DNA excision repair protein ERCC-4	1
CNAG_02717	_AVGFAS[Phospho (STY)]PEESK_	-	aryl-alcohol dehydrogenase	7.01911	0.0162958		CNAG_04606	-	hypothetical protein	1
CNAG_06742	_VANLPPVAAAS[Phospho (STY)]FNEK_	-	pre-60S factor REI1	7.01644	0.028251		CNAG_06440	-	DNA dependent ATPase	1
CNAG_04939	_HRGDDSPGKMGLGIGLS[Phospho (STY)]DLGTTTATSK_	CDC14	CDC14 domain-containing protein	7.01334	0.0355707		CNAG_02922	-	hypothetical protein	1
CNAG_02293	_SQPTDAVNSRSPHLS[Phospho (STY)]NNR_	-	hypothetical protein	7.01243	0.0110834		CNAG_01322	-	hypothetical protein	1
CNAG_04864	_FYPS[Phospho (STY)]PSAASAGSAPGSANAAMAGYGHYSMSR_	CIR1	iron regulator 1, variant	7.01014	0.0155287		CNAG_04284	-	hypothetical protein	1
CNAG_06724	_SFS[Phospho (STY)]APALSNR_	-	DNA repair and recombination protein RAD52	7.01008	0.02033		CNAG_03003	-	chromatin structure-remodeling complex subunit SFH1	1
CNAG_07163	_AQALEPGAEPLKSPSY[Phospho (STY)]MDTFNAAK_	-	preprotein translocase subunit YidC	7.00369	0.0438008		CNAG_03846	-	vacuolar membrane protein	1
CNAG_05747	_NGSFSSTVRPT[Phospho (STY)]VPSPPAMSPR_	-	vacuolar protein sorting-associated protein VTA1, variant 2	7.00059	0.0129529		CNAG_03672	-	BET3 family protein	1
CNAG_01431	_SPLPDTFSRSPAPLS[Phospho (STY)]ANDQIAILR_	HOB1	hypothetical protein	6.99943	0.0213043		CNAG_03072	-	enolase	1
CNAG_05577	_DSLSTSHPHS[Phospho (STY)]PPHVSPSATLR_	-	hypothetical protein	6.99448	0.0213996		CNAG_05457	-	Pentatricopeptide repeat protein	1
CNAG_07717	_VFDHLITDNGGMVAASS[Phospho (STY)]PLRQDIGDNESNK_	-	ubiquitin carboxyl-terminal hydrolase 4/11/15	6.99249	0.0132543		CNAG_02528	-	hypothetical protein, variant	1
CNAG_04137	_VAAAAATGAS[Phospho (STY)]GSGNGVLRTPTR_	-	hypothetical protein	6.99202	0.0119117		CNAG_05484	-	CAMKK/CAMKK-META protein kinase	1
CNAG_03945	_SPSPLS[Phospho (STY)]PR_	-	hypothetical protein	6.99128	0.0206687		CNAG_01123	-	DRAP deaminase	1
CNAG_01376	_GFTDPSPPGFDHS[Phospho (STY)]LR_	-	stress response protein NST1, variant	6.98585	0.0261176		CNAG_06470	-	hypothetical protein	1
CNAG_03314	_GPVYLFFSVNGSRHFC[Carbamidomethyl (C)]GVAEMT[Phospho (STY)]TPVDETK_	-	YTH domain family 2	6.98536	0.0315307		CNAG_00267	-	hypothetical protein	1
CNAG_06607	_RKSS[Phospho (STY)]PEIPSSDGYQAPSSDSSFFSSR_	POL1	DNA polymerase alpha subunit A	6.98522	0.0158534		CNAG_04620	-	hypothetical protein	1
CNAG_00106	_LEPTPAT[Phospho (STY)]EPDDPLR_	TCO5	Two-component-like sensor kinase	6.98465	0.0155196		CNAG_07312	-	hypothetical protein	1
CNAG_03886	_GSVATSEITDDGLAT[Phospho (STY)]VVETPR_	-	hypothetical protein	6.98212	0.0161958		CNAG_04725	-	hypothetical protein, variant	1
CNAG_01892	_IHEYTDRHVAST[Phospho (STY)]DPEHPAPPSETTANAAR_	-	hypothetical protein	6.98134	0.00952995		CNAG_00365	-	lysophospholipid acyltransferase	1
CNAG_04500	_SSHRQDT[Phospho (STY)]FEHPQDDAPSWLTWEK_	-	hypothetical protein	6.97828	0.037233		CNAG_06749	-	hypothetical protein	1
CNAG_06325	_DSIASTVNSESWGSPSTS[Phospho (STY)]ASGKK_	BYR4	GTPase activator	6.97453	0.0167742		CNAG_03494	-	hypothetical protein	1
CNAG_06661	_NASMVSIETTSSSMSPAS[Phospho (STY)]RR_	-	hypothetical protein	6.97444	0.0121195		CNAG_02989	-	PX domain-containing protein	1
CNAG_04326	_DAIALDS[Phospho (STY)]SASPSEAAK_	-	malate dehydrogenase (oxaloacetate- decarboxylating)	6.97169	0.0170376		CNAG_00674	-	hypothetical protein	1
CNAG_01694	_SANTLTNT[Phospho (STY)]DPASPSRLPSSPR_	-	hypothetical protein	6.96869	0.0403402		CNAG_06710	-	hypothetical protein	1
CNAG_00523	_DKLS[Phospho (STY)]DDNRAEIQR_	-	hypothetical protein, variant	6.9684	0.0390681		CNAG_03457	-	arginine-tRNA ligase	1
CNAG_00073	_S[Phospho (STY)]QLFSPASQQPR_	FAR8	nuclear mRNA splicing protein	6.96817	0.0377391		CNAG_01400	-	3-deoxy-7-phosphoheptulonate synthase	1
CNAG_06332	_ELEQPPQT[Phospho (STY)]PRK_	-	hypothetical protein	6.96754	0.0220517		CNAG_07942	-	cell division control protein 25	1
CNAG_02024	_EVYPLT[Phospho (STY)]PPSMKPSSEK_	-	hypothetical protein	6.96713	0.0174573		CNAG_05748	-	NuA3 HAT complex component NTO1	1
CNAG_04875	_S[Phospho (STY)]SPTGGM[Oxidation (M)]GLPGSGSGVGVGPIDM[Oxidation (M)]VGR_	-	hypothetical protein	6.96554	0.0222002		CNAG_03161	-	hypothetical protein	1
CNAG_06740	_ISAKPPMPIAS[Phospho (STY)]RELTK_	-	septation protein imp2	6.96078	0.0194412		CNAG_04405	-	cyclin H	1
CNAG_04119	_MGQLAFESNSGESWMDDVTGISVS[Phospho (STY)]PDDGRNPVLPPK_	ROM2	rho guanyl-nucleotide exchange factor	6.93889	0.0302857		CNAG_02338	-	cellular nucleic acid-binding protein	1
CNAG_03818	_SGS[Phospho (STY)]PNNSLSR_	SSK1	osomolarity two-component system, response regulator SSK1	6.93707	0.0320954		CNAG_06983	-	hypothetical protein	1
CNAG_02360	_TSTPFT[Phospho (STY)]PVDEK_	-	hypothetical protein	6.93508	0.0224586		CNAG_08023	-	hypothetical protein	1
CNAG_04974	_[Acetyl (Protein N-term)]TSAAAVNTPGTSMSHS[Phospho (STY)]PPVLPTDIPR_	-	hypothetical protein	6.93273	0.0133854		CNAG_05976	-	nucleolar protein 58	1
CNAG_04361	_SAM[Oxidation (M)]RPTSPQPHSPSPPKLDLPITPM[Oxidation (M)]Y[Phospho (STY)]TISAPAPISLEEVK_	-	hypothetical protein	6.93156	0.0234388		CNAG_06200	-	hypothetical protein, variant	1
CNAG_01897	_SSISKPSPS[Phospho (STY)]VNGNSQPK_	BDF1	bromodomain-containing factor 1	6.93108	0.0415668		CNAG_06063	-	cytochrome c oxidase assembly protein subunit 15	1
CNAG_01454	_ALHSS[Phospho (STY)]PYHNNPLYNPYNPHSTDAAVANGQSFTR_	STE12alpha	transcription factor STE12	6.92766	0.0360049		CNAG_04720	-	GTPase activating protein	1
CNAG_03115	_YLSPTLDT[Phospho (STY)]QSAWVADVNQR_	FZC46	hypothetical protein	6.92698	0.0136115		CNAG_02703	-	hypothetical protein, variant	1
CNAG_05558	_DTTVNVSGLSSS[Phospho (STY)]GHLVK_	KIN4	CAMK/CAMKL/KIN4 protein kinase	6.92648	0.0196689		CNAG_04762	-	large subunit ribosomal protein L4e	1
CNAG_04191	_S[Phospho (STY)]VSPQPR_	CEX1	SCYL protein kinase	6.92539	0.0408325		CNAG_01769	-	solute carrier family 25 (mitochondrial aspartate/glutamate transporter), member 12/13	1
CNAG_04589	_TLS[Phospho (STY)]GSSASPR_	-	hypothetical protein	6.92076	0.0254388		CNAG_06903	-	mRNA-decapping enzyme subunit 2	1
CNAG_04758	_IDSRPQLT[Phospho (STY)]SGDVIAEVAPSNGHESSTTEKVDPHATGNAAAGGGR_	AMT2	amt family ammonium transporter	6.91495	0.0268514		CNAG_03287	-	28 kda golgi snare protein	1
CNAG_06193	_HDS[Phospho (STY)]APTSPYGHSK_	CRK1	CMGC/RCK protein kinase	6.91261	0.0155119		CNAG_06075	-	hypothetical protein	1
CNAG_07163	_AQALEPGAEPLKS[Phospho (STY)]PSYMDTFNAAK_	-	preprotein translocase subunit YidC	6.91258	0.0157512		CNAG_00175	-	hypothetical protein	1
CNAG_00056	_VPTALDVGS[Phospho (STY)]GTLGTPRR_	-	hypothetical protein	6.90669	0.0246813		CNAG_06638	-	malate dehydrogenase (oxaloacetate- decarboxylating)	1
CNAG_01082	_DTLTLDDRSQGSTSAPPT[Phospho (STY)]K_	-	hypothetical protein	6.90046	0.0191121		CNAG_05421	-	hypothetical protein	1
CNAG_04962	_AGSGPSAIAS[Phospho (STY)]GAK_	-	hypothetical protein	6.89984	0.0369083		CNAG_00070	-	hypothetical protein	1
CNAG_07491	_MHFDEPISPRSQPS[Phospho (STY)]NLPGFESR_	-	glutaredoxin	6.89789	0.0135543		CNAG_00696	-	alpha-mannosidase	1
CNAG_07634	_AGLVSRDSTGS[Phospho (STY)]ATNK_	-	hypothetical protein	6.89662	0.00309091		CNAG_03402	-	hypothetical protein	1
CNAG_02341	_ADSTST[Phospho (STY)]IVENETSR_	-	cyclin binding protein	6.89391	0.0257117		CNAG_04537	-	hypothetical protein	1
CNAG_01526	_LAEHEAEGSEDGDGGAITPNGAGVS[Phospho (STY)]HSKR_	-	cleavage and polyadenylation specificity factor subunit 4	6.8918	0.0220492		CNAG_03376	-	cytoplasmic protein, variant	1
CNAG_03655	_ASGGDMPPPASTS[Phospho (STY)]RKPSR_	-	hypothetical protein, variant	6.88765	0.0180688		CNAG_04341	-	recyclin-1	1
CNAG_00272	_DVAGVFDGLC[Carbamidomethyl (C)]PKLDS[Phospho (STY)]DMSAK_	-	hypothetical protein	6.88735	0.002		CNAG_04655	-	rab family protein	1
CNAG_06796	_RPSPPPS[Phospho (STY)]AAQIR_	-	serine/arginine repetitive matrix protein 1	6.88723	0.0173366		CNAG_07925	-	nucleoprotein TPR	1
CNAG_04118	_QDY[Phospho (STY)]GTAPSPQR_	CTK1	CMGC/CDK/CRK7 protein kinase	6.88121	0.0212541		CNAG_00683	-	CMGC/CLK protein kinase	1
CNAG_04377	_HTAIYDDPRS[Phospho (STY)]PHPPAAPPRPAFLR_	SEA2	vacuolar protein	6.88053	0.0159506		CNAG_02898	-	RNA-binding protein 8A	1
CNAG_01720	_SPPTSSAPQHVQT[Phospho (STY)]PSESPSMPNQPR_	VPS23	ESCRT-I complex subunit TSG101	6.88006	0.0163144		CNAG_05141	-	hypothetical protein	1
CNAG_01298	_APSLPAM[Oxidation (M)]TPKPLSPIT[Phospho (STY)]HK_	-	lysophospholipase NTE1	6.87913	0.0323765		CNAG_03496	-	hypothetical protein	1
CNAG_03135	_SFRS[Phospho (STY)]PHDQYPSPQR_	-	hypothetical protein	6.87502	0.0406584		CNAG_02464	-	5-oxoprolinase (ATP-hydrolysing)	1
CNAG_00078	_TVQSNNGVLSLPS[Phospho (STY)]PDHQQSHGYFTQALRR_	-	vacuolar protein	6.87409	0.0389571		CNAG_01115	-	hypothetical protein	1
CNAG_05940	_SPY[Phospho (STY)]SNFMMSSK_	ZFC3	hypothetical protein	6.87041	0.0230419		CNAG_05645	-	COP9 signalosome complex subunit 3	1
CNAG_02994	_LKS[Phospho (STY)]EDAGKGTGAGVGSASNAR_	-	hypothetical protein, variant	6.86829	0.0132564		CNAG_05975	-	ribonuclease Z	1
CNAG_06192	_TVSS[Phospho (STY)]PLSGR_	-	hypothetical protein	6.86687	0.0254314		CNAG_03976	-	hypothetical protein	1
CNAG_05139	_AMSSTSVSSPPQSPIGQPGHTS[Phospho (STY)]YQSLQQQTFHNQK_	UGT1	UDP-galactose transporter	6.86568	0.0325159		CNAG_07319	-	hypothetical protein	1
CNAG_07163	_AQALEPGAEPLKSPSYMDT[Phospho (STY)]FNAAK_	-	preprotein translocase subunit YidC	6.86241	0.0158835		CNAG_05284	-	hypothetical protein	1
CNAG_05391	_ANEVDADGVSESQAGEAGLPS[Phospho (STY)]RK_	-	centromere protein C	6.86121	0.0195478		CNAG_05215	-	hypothetical protein	1
CNAG_06473	_EHAAGHGQMQVIPQGDWRPS[Phospho (STY)]VDESR_	-	hypothetical protein	6.8603	0.0167799		CNAG_03113	-	trehalose synthase	1
CNAG_02130	_NHSGTELITAT[Phospho (STY)]ALASNAR_	NSR1	RNA-binding protein 39	6.86011	0.0320382		CNAG_00661	-	hypothetical protein	1
Mbs1	_AKM[Oxidation (M)]HDST[Phospho (STY)]PDADASFR_	#N/A	#N/A	6.85938	0.0227122		CNAG_00317	-	hypothetical protein	1
CNAG_04693	_ADS[Phospho (STY)]SSSITAPQSPTSK_	SIN1	target of rapamycin complex 2 subunit	6.85922	0.026448		CNAG_00569	-	GTP cyclohydrolase II	1
CNAG_01941	_TPSPLARS[Phospho (STY)]PR_	-	glucan synthesis regulatory protein	6.85094	0.0296437		CNAG_04271	-	hypothetical protein	1
CNAG_06902	_SVASNVFLAPPPNGLS[Phospho (STY)]PLREQLSASYHADLEPMPTPTAQK_	-	hypothetical protein	6.85084	0.0438368		CNAG_04233	-	hypothetical protein	1
CNAG_07744	_SGFTSPSPSSSSPFTPGLVQAQGQSPS[Phospho (STY)]TPGPK_	PIK1	1-phosphatidylinositol 4-kinase	6.85078	0.0258602		CNAG_02064	-	TATA-box-binding protein-associated factor	1
CNAG_04176	_NSMSSDLLLARPST[Phospho (STY)]GESIRER_	HSF2	hypothetical protein	6.8506	0.047843		CNAG_02412	-	rRNA-processing protein CGR1	1
CNAG_03017	_NPSQPPSRPTS[Phospho (STY)]RPPTAR_	-	transcription initiation factor TFIIF subunit alpha	6.84999	0.0393878		CNAG_02515	-	hypothetical protein	1
CNAG_01212	_SFTPT[Phospho (STY)]PPLSR_	-	hypothetical protein	6.84964	0.0228211		CNAG_04708	-	hypothetical protein	1
CNAG_03360	_RAPS[Phospho (STY)]AT[Phospho (STY)]ADSSTLSPAAASFVYPQPDAR_	-	hypothetical protein	6.8496	0.0206669		CNAG_00667	-	hypothetical protein	1
CNAG_03388	_GKSPAGSLSIFIPPS[Phospho (STY)]NGQIPETSHNAMSSK_	RCO1	nuclear protein	6.84188	0.014616		CNAG_01555	-	hypothetical protein	1
CNAG_05230	_SSS[Phospho (STY)]HDPPSPPPPAETR_	-	sentrin/sumo-specific protease	6.83842	0.0302784		CNAG_01168	-	H/ACA ribonucleoprotein complex subunit 4	1
CNAG_01988	_HVQNASNQDHGSSSTPVS[Phospho (STY)]PAASSAGPLS[Phospho (STY)]PNIQPGSFVFPIR_	PHY1	bacteriophytochrome histidine kinase, variant	6.83789	0.0127961		CNAG_06884	-	hypothetical protein	1
CNAG_00482	_GNLPGT[Phospho (STY)]PNAQAHAEAADKAGAIAESGTGSTFISGNPLTGNR_	-	26S proteasome regulatory subunit N10	6.83769	0.0218088		CNAG_02000	-	Short-chain dehydrogenase	1
CNAG_04478	_SPTGLPASS[Phospho (STY)]SER_	-	hypothetical protein	6.83598	0.0127889		CNAG_00393	-	1,4-alpha-glucan-branching enzyme	1
CNAG_02550	_LNNHPAPLPEQPESPKAEPRS[Phospho (STY)]PPLR_	-	hypothetical protein	6.83584	0.0440131		CNAG_00257	-	kinesin family member 21A, variant	1
CNAG_00779	_GSVSSETFKEPT[Phospho (STY)]QREDSK_	RPL27	large subunit ribosomal protein L27e	6.83578	0.0440261		CNAG_05767	-	hypothetical protein, variant	1
CNAG_02974	_TLTPS[Phospho (STY)]NVAFK_	-	voltage-dependent anion channel protein 2	6.83297	0.0382981		CNAG_01020	-	hypothetical protein	1
CNAG_03763	_EALADSPPS[Phospho (STY)]TPIR_	-	IQ domain-containing GTPase activating protein	6.83287	0.0127855		CNAG_03348	-	hypothetical protein	1
CNAG_01631	_RTSTGSHTSMSLS[Phospho (STY)]PR_	-	mRNA cap guanine-N7 methyltransferase	6.83142	0.0135281		CNAG_04397	-	hypothetical protein	1
CNAG_00398	_DDSSSKSPSNNMQSS[Phospho (STY)]APAPALPPR_	-	hypothetical protein	6.82801	0.0212173		CNAG_01492	-	hypothetical protein	1
CNAG_07825	_WDDDLTLTSPQT[Phospho (STY)]T[Phospho (STY)]AAAMPSSPQKR_	-	hypothetical protein	6.82783	0.0454566		CNAG_03553	-	hypothetical protein	1
CNAG_07848	_PATLHSGSTAS[Phospho (STY)]LPSANHR_	-	hypothetical protein	6.82778	0.0243811		CNAG_00506	-	hypothetical protein	1
CNAG_04119	_MASDS[Phospho (STY)]SVLSSDNATK_	ROM2	rho guanyl-nucleotide exchange factor	6.82776	0.0310921		CNAG_00348	-	hypothetical protein	1
CNAG_04361	_GGDES[Phospho (STY)]SS[Phospho (STY)]DEDNGNLVSVSNNR_	-	hypothetical protein	6.82748	0.0115165		CNAG_00285	-	hypothetical protein	1
CNAG_01730	_STGS[Phospho (STY)]NHSLEAFDSPR_	STE7	STE/STE7/MEK1 protein kinase	6.82737	0.0393095		CNAG_00294	-	splicing factor 45	1
CNAG_00770	_YLGSGSKPSSSSGS[Phospho (STY)]YAR_	MSH2	DNA mismatch repair protein Msh2	6.82477	0		CNAG_06060	-	hypothetical protein	1
CNAG_00636	_IKTPDT[Phospho (STY)]SAVEQAVYDAR_	CDC7	CDC7 protein kinase	6.82412	0.0316674		CNAG_01060	-	hypothetical protein	1
CNAG_06151	_SPSAPATTS[Phospho (STY)]NISDR_	YPD1	osomolarity two-component system, phosphorelay intermediate protein YPD1	6.82376	0.0374789		CNAG_05233	-	hypothetical protein	1
CNAG_01029	_AADDT[Phospho (STY)]PPTEAMLR_	-	impact family protein	6.81765	0.0357726		CNAG_05830	-	cytoplasmic protein, variant	1
CNAG_02853	_KIQTVVEQPEVQISC[Carbamidomethyl (C)]SGPM[Oxidation (M)]NGSDS[Phospho (STY)]LM[Oxidation (M)]GLANHSPK_	-	amidophosphoribosyltransferase	6.81671	0.0465987		CNAG_02717	-	aryl-alcohol dehydrogenase	1
CNAG_01420	_SLFTGQGPLAPGS[Phospho (STY)]APLLPS[Phospho (STY)]PTR_	-	hypothetical protein	6.81639	0.0166413		CNAG_06742	-	pre-60S factor REI1	1
CNAG_00914	_MQYGSQS[Phospho (STY)]PTLGREPLLASVQNPGMSQR_	KRE6	glucosidase	6.81608	0.0364418		CNAG_05577	-	hypothetical protein	1
CNAG_01012	_LTPSKVSS[Phospho (STY)]PLTR_	-	hypothetical protein	6.81146	0.0204362		CNAG_03314	-	YTH domain family 2	1
CNAG_06090	_DLAPIGT[Phospho (STY)]RPPSPNSVAR_	-	hypothetical protein	6.80911	0.030297		CNAG_04326	-	malate dehydrogenase (oxaloacetate- decarboxylating)	1
CNAG_04027	_C[Carbamidomethyl (C)]SPLHHPPSEC[Carbamidomethyl (C)]EQVQMQTQPSTPAY[Phospho (STY)]FPIQLPR_	-	hypothetical protein	6.80794	0.0237063		CNAG_01694	-	hypothetical protein	1
CNAG_01130	_VS[Phospho (STY)]QPIEEDAQSVTM[Oxidation (M)]ESESDSDTVLVSR_	-	hypothetical protein	6.80615	0.024959		CNAG_00523	-	hypothetical protein, variant	1
CNAG_02789	_YQVPENLISDST[Phospho (STY)]AEEARSPSK_	-	nitrogen permease regulator 2	6.80114	0.0392241		CNAG_04875	-	hypothetical protein	1
CNAG_04987	_ERLS[Phospho (STY)]EWVDPR_	-	hypothetical protein	6.79878	0.0220682		CNAG_02360	-	hypothetical protein	1
CNAG_03378	_EVSLGRSPSIST[Phospho (STY)]AAPLT[Phospho (STY)]PSSLR_	CLR2	DNA binding protein, putative	6.7919	0.0140892		CNAG_04974	-	hypothetical protein	1
CNAG_04137	_PSSLPAPATSS[Phospho (STY)]VSHPVGVTDEKEQMR_	-	hypothetical protein	6.79006	0.0450259		CNAG_00272	-	hypothetical protein	1
CNAG_02091	_QAIVKGEAEPTESEVEAGQASDLEDS[Phospho (STY)]DVEDEEEKK_	NAP1	Nucleosome assembly protein 1	6.78956	0.015896		CNAG_06796	-	serine/arginine repetitive matrix protein 1	1
CHS5	_DLLASSIHKSEKDPLDT[Phospho (STY)]EPQAGETTEVYR_	#N/A	#N/A	6.78852	0.0299727		CNAG_02550	-	hypothetical protein	1
CNAG_00757	_GPS[Phospho (STY)]PPKPDVGSGVGLHR_	DOA4	ubiquitin carboxyl-terminal hydrolase 8	6.7873	0.0351997		CNAG_02974	-	voltage-dependent anion channel protein 2	1
CNAG_02788	_GNGRDSAT[Phospho (STY)]LSPR_	-	hypothetical protein	6.78656	0.0143617		CNAG_07825	-	hypothetical protein	1
CNAG_02662	_GFTGIWNSST[Phospho (STY)]LSLGMPIGGSPNKER_	ATG4	cysteine protease atg4	6.78552	0.0113546		CNAG_01029	-	impact family protein	1
CNAG_03989	_SASVSLGSIGSDRSS[Phospho (STY)]ETSLSASIVK_	-	hypothetical protein	6.78347	0.0345275		CNAG_04987	-	hypothetical protein	1
CNAG_06798	_AFS[Phospho (STY)]PS[Phospho (STY)]PS[Phospho (STY)]HDR_	UTP18	U3 small nucleolar RNA-associated protein 18	6.78248	0.039098		CNAG_02152	-	hypothetical protein	1
CNAG_03216	_S[Phospho (STY)]QSVHKGGGMPAQSAPVQSSGFK_	SNF101	CAMK protein kinase	6.78237	0.0144311		CNAG_04365	-	ribosome biogenesis protein MAK21	1
CNAG_02152	_IPWPPS[Phospho (STY)]PSFEC[Carbamidomethyl (C)]R_	-	hypothetical protein	6.7754	0.0155658		CNAG_02834	-	sterol 3-beta-glucosyltransferase	1
CNAG_04832	_DVIVTS[Phospho (STY)]SRPLSSMSKDSK_	-	RalA-binding protein 1	6.7737	0.0136464		CNAG_05904	-	small subunit ribosomal protein S14	1
CNAG_07634	_AGLVSRDSTGSAT[Phospho (STY)]NK_	-	hypothetical protein	6.77185	0.0105426		CNAG_02371	-	coiled-coil domain-containing protein 130	1
CNAG_02458	_VLPPPPSPLKTEDLVGGGSLDSPGSPREEC[Carbamidomethyl (C)]FIPPS[Phospho (STY)]DPR_	-	GTPase activating protein	6.77175	0.0415683		CNAG_07936	-	hypothetical protein	1
CNAG_04365	_ELPTFGSYEDY[Phospho (STY)]K_	-	ribosome biogenesis protein MAK21	6.77023	0.0126427		CNAG_01533	-	rho GTPase activator	1
CNAG_00583	_ALPPTPILVPSKSPSSNLGS[Phospho (STY)]QIAAGSK_	-	hypothetical protein	6.76856	0.0158079		CNAG_00344	-	hypothetical protein	1
CNAG_06631	_STSGGSSGTKGY[Phospho (STY)]FFSPPDQEPSAPQSPTVAPKPR_	-	myosin heavy chain	6.76188	0.0153547		CNAG_00698	-	hypothetical protein	1
CNAG_01143	_TTRGDGYS[Phospho (STY)]S[Phospho (STY)]PPAGPSNPR_	-	hypothetical protein	6.76153	0.0314691		CNAG_04925	-	nuclear protein	1
CNAG_03836	_EGIPSTAPVGY[Phospho (STY)]TIVESPSSK_	-	hypothetical protein, variant	6.75727	0.0218158		CNAG_00172	-	kinesin	1
CNAG_07491	_ALSLPSITMPFNNYGNNNAPLLPLT[Phospho (STY)]R_	-	glutaredoxin	6.75182	0.0431615		CNAG_05663	-	cell wall integrity protein scw1	1
CNAG_01062	_STISAEYLGPEDYHTPDPGS[Phospho (STY)]PSSK_	PSK201	CAMK/CAMKL/PASK protein kinase	6.75001	0.0170716		CNAG_02992	-	actin cross-linking protein	1
CNAG_07524	_LDKESTMLSPSGPEY[Phospho (STY)]GDLDPAPALAHRK_	-	AMP deaminase	6.74512	0.0245065		CNAG_06588	-	hypothetical protein, variant	1
CNAG_03213	_AT[Phospho (STY)]LLAVAMAMDEDNLTPPPISDVEDDQVGK_	UVE1	UV damage endonuclease UvdE	6.73953	0.038112		CNAG_00906	-	nucleolar pre-ribosomal-associated protein 1, variant	1
CNAG_00757	_QFVVTASSKPPPTPS[Phospho (STY)]QEKSPPSAPVNVQASGSSSR_	DOA4	ubiquitin carboxyl-terminal hydrolase 8	6.73172	0.0112287		CNAG_00983	-	hypothetical protein	1
CNAG_02796	_NLSDS[Phospho (STY)]INSLSMS[Phospho (STY)]AGDLRK_	-	3-deoxy-7-phosphoheptulonate synthase	6.73063	0.0211788		CNAG_05007	-	translation initiation factor eIF-2B subunit beta	1
CNAG_07605	_VPAPLHTPC[Carbamidomethyl (C)]PQS[Phospho (STY)]PRHS[Phospho (STY)]PSYPSDLTSLSSK_	-	hypothetical protein	6.72448	0.0146786		CNAG_04011	-	large subunit ribosomal protein L37a	1
CNAG_03378	_EVSLGRSPSIS[Phospho (STY)]TAAPLT[Phospho (STY)]PSSLR_	CLR2	DNA binding protein, putative	6.7244	0.022915		CNAG_04175	-	hypothetical protein, variant	1
CNAG_04040	_ELVQTTSSPSPSGGGAGGVSGHSSS[Phospho (STY)]AMPIPGSVR_	FPK1	AGC/RSK protein kinase, variant	6.72343	0.0386366		CNAG_07659	-	hypothetical protein	1
CNAG_03815	_ASDSPITT[Phospho (STY)]S[Phospho (STY)]IRSPFADPSPPLPAAIDR_	-	hypothetical protein	6.72261	0.0156097		CNAG_05410	-	hypothetical protein	1
CNAG_03673	_EGLKSSFLGSS[Phospho (STY)]PPPPSAM[Oxidation (M)]SVSPASTTGGR_	PPZ1	serine/threonine-protein phosphatase PP-Z1	6.72249	0.0146839		CNAG_00292	-	zinc finger protein	1
CNAG_05465	_TTHHGHTGYLNT[Phospho (STY)]LAVSPDGSLAASGGK_	GIB2	G protein beta subunit Gib2	6.71845	0.0113238		CNAG_00682	-	kinesin	1
CNAG_02834	_LGS[Phospho (STY)]S[Phospho (STY)]LSTIRPMSSSSPTHAK_	-	sterol 3-beta-glucosyltransferase	6.71512	0.0449926		CNAG_03884	-	hypothetical protein	1
CNAG_05809	_DGPAVGSKPPTAVLMMNMGGPS[Phospho (STY)]TVPEVHDFLSR_	HEM15	ferrochelatase	6.71327	0.0303199		CNAG_01576	-	hypothetical protein	1
CNAG_05904	_IEDVTPTPSDST[Phospho (STY)]RRK_	-	small subunit ribosomal protein S14	6.71152	0.0264395		CNAG_04656	-	arginine-tRNA-protein transferase, variant	1
CNAG_03645	_AS[Phospho (STY)]LLAGGNHVDESDIGTPGSVTASGNK_	WDP3	NET1-associated nuclear protein 1 (U3 small nucleolar RNA-associated protein 17), variant	6.71139	0.0377886		CNAG_02825	-	Argininosuccinate lyase	1
CNAG_06418	_RMGAGLLVSDS[Phospho (STY)]YGESR_	PTC6	PP2Cc protein phosphatase	6.70987	0.0345527		CNAG_00717	-	hypothetical protein	1
CNAG_01006	_LGPTASPS[Phospho (STY)]ISPEKK_	-	hypothetical protein	6.70523	0.0248543		CNAG_06165	-	sterility protein Ste20	1
CNAG_07815	_HFAS[Phospho (STY)]SQMSPSR_	-	hypothetical protein	6.69918	0.0214304		CNAG_05749	-	hypothetical protein	1
CNAG_01149	_QSASSRPS[Phospho (STY)]S[Phospho (STY)]FGPSNDLMK_	-	hypothetical protein	6.69858	0.0324826		CNAG_01087	-	hypothetical protein	1
CNAG_02371	_C[Carbamidomethyl (C)]KC[Carbamidomethyl (C)]HLC[Carbamidomethyl (C)]S[Phospho (STY)]GWFEIR_	-	coiled-coil domain-containing protein 130	6.69771	0.0450032		CNAG_05936	-	DNA-directed RNA polymerase III subunit RPC1	1
CNAG_07936	_RPS[Phospho (STY)]ISYESR_	-	hypothetical protein	6.69745	0.0142301		CNAG_04053	-	hypothetical protein	1
CNAG_01126	_QQAGARPPSAVQEHRS[Phospho (STY)]R_	-	guanine nucleotide exchange protein for ADP- robosylation factor	6.69636	0.0218164		CNAG_01315	-	protein transporter	1
CNAG_01533	_LPSRPSIT[Phospho (STY)]K_	-	rho GTPase activator	6.69619	0.015576		CNAG_05109	-	CBS and PB1 domain-containing protein	1
CNAG_01062	_STISAEYLGPEDYHT[Phospho (STY)]PDPGSPSSK_	PSK201	CAMK/CAMKL/PASK protein kinase	6.69544	0.0311136		CNAG_03210	-	SAGA-associated factor 73, variant	1
CNAG_03763	_QSSPS[Phospho (STY)]IPLASK_	-	IQ domain-containing GTPase activating protein	6.69505	0.0159203		CNAG_00008	-	hypothetical protein	1
CNAG_06019	_LLSATADDHTSQS[Phospho (STY)]PSRK_	-	hypothetical protein, variant	6.69491	0.00984762		CNAG_05671	-	oxidation resistance protein 1	1
CNAG_04604	_IFGPEEGGSSAS[Phospho (STY)]R_	-	tryptophan-tRNA ligase	6.69447	0.0108441		CNAG_03669	-	hypothetical protein	1
CNAG_01941	_S[Phospho (STY)]PHSPLS[Phospho (STY)]PHSVSFHSPHSPYSSR_	-	glucan synthesis regulatory protein	6.68886	0.01387		CNAG_03720	-	D-tyrosyl-tRNA(Tyr) deacylase, variant	1
CNAG_01815	_VKSNAFPS[Phospho (STY)]GLTNSEAGSPVAVDPPR_	-	hypothetical protein	6.68675	0.0489833		CNAG_01094	-	pre-mRNA-splicing factor CWC25	1
CNAG_01526	_STS[Phospho (STY)]SLAVVNSGGGGR_	-	cleavage and polyadenylation specificity factor subunit 4	6.68176	0.0191188		CNAG_05253	-	hypothetical protein	1
CNAG_01362	_SLDPTNAVANIPTADSLPLTSNPS[Phospho (STY)]GPK_	-	cell cycle control protein cwf19	6.68009	0.0133071		CNAG_03456	-	hypothetical protein	1
CNAG_01182	_RVNGSNS[Phospho (STY)]EVPASTDFA_	-	cytoplasmic protein	6.67542	0.0395801		CNAG_04132	-	pre-mRNA-splicing factor CWC2, variant	1
CNAG_00344	_ILT[Phospho (STY)]APSTPSR_	-	hypothetical protein	6.67437	0.0268326		CNAG_04318	-	telomere length regulation protein	1
CNAG_01149	_GPSTQHVLTQNQPPTVDTQVSQQPQAQVPQPPLQS[Phospho (STY)]PR_	-	hypothetical protein	6.67056	0.0213497		CNAG_05706	-	hypothetical protein	1
CNAG_03727	_TPGGGIMRSPIS[Phospho (STY)]MMNGAR_	-	hypothetical protein	6.66895	0.0465043		CNAG_06294	-	hypothetical protein	1
CNAG_06332	_GTSVTETVGTVPITPEEGVS[Phospho (STY)]LRGDAVIDPK_	-	hypothetical protein	6.66874	0.0477384		CNAG_00558	-	hypothetical protein	1
CNAG_06351	_RPSSPS[Phospho (STY)]T[Phospho (STY)]PGQSSSFAVAR_	SBH1	protein transporter SEC61 subunit beta	6.66283	0.0198119		CNAG_04535	-	Tartrate dehydrogenase	1
CNAG_07431	_SY[Phospho (STY)]GTASAPLGAHEGSWQASSVDGLGVGNSR_	-	MATE family multidrug resistance protein	6.66179	0.0191103		CNAG_00780	-	hypothetical protein	1
CNAG_07745	_SGDWPVPPS[Phospho (STY)]HPLIGGHEGVGIIVAIGDHTAASPVK_	MPD1	alcohol dehydrogenase, propanol-preferring	6.66125	0.0458838		CNAG_05741	-	hypothetical protein, variant	1
CNAG_00698	_ETLAISSPSPS[Phospho (STY)]SPNTSFTSPSSTTMAR_	-	hypothetical protein	6.659	0.0174439		CNAG_04199	-	hypothetical protein	1
CNAG_01578	_QLQNSNRASPNT[Phospho (STY)]R_	-	hypothetical protein	6.65818	0.0110774		CNAG_01000	-	nuclear pore complex protein Nup155	1
CNAG_07595	_GSFTPPPPPPPPPPGGQTGPPGRAS[Phospho (STY)]LDTGPSR_	-	hypothetical protein	6.65816	0.0111821		CNAG_05485	-	tRNA (adenine-N(1)-)-methyltransferase catalytic subunit trm61	1
CNAG_04090	_[Acetyl (Protein N-term)]AAVAQAPPSM[Oxidation (M)]PHSSIENSVTRPSSSASNS[Phospho (STY)]KR_	ATF1	activating transcription factor	6.6579	0.0118333		CNAG_00043	-	hypothetical protein, variant	1
CNAG_03608	_LSS[Phospho (STY)]PSSSVGK_	-	hypothetical protein	6.65607	0.0118923		CNAG_07502	-	CTP synthase	1
CNAG_04740	_KHGPVPTVIEPDAEGEDRPEPSSVS[Phospho (STY)]PSASNR_	-	hypothetical protein	6.65514	0.0162169		CNAG_05516	-	hypothetical protein, variant	1
CNAG_04198	_VT[Phospho (STY)]PLPKPLAPPPKPSPGSTASAQSGAGR_	-	hypothetical protein	6.65277	0.0438924		CNAG_01296	-	RNA polymerase I-specific transcription initiation factor RRN3	1
CNAG_04137	_VAAAAATGASGSGNGVLRT[Phospho (STY)]PTR_	-	hypothetical protein	6.63834	0.0143877		CNAG_04838	-	hypothetical protein	1
CNAG_07415	_QRS[Phospho (STY)]QDDKILPSTGK_	-	hypothetical protein	6.63674	0.0220757		CNAG_04443	-	hypothetical protein	1
CNAG_07903	_AGDVHGGAIT[Phospho (STY)]PR_	ROM20	Predicted Rho guanine nucleotide exchange factor (Rho GEF)	6.63533	0.0114268		CNAG_05030	-	zinc finger protein 830, variant	1
CNAG_00777	_S[Phospho (STY)]GVINGVQGKGSPLAPQGQQQQSQQPR_	-	CCR4-NOT transcriptional complex subunit CAF120	6.63504	0.035072		CNAG_05610	-	hypothetical protein	1
CNAG_04925	_LSSPTALIS[Phospho (STY)]LPPTR_	-	nuclear protein	6.63085	0.00643299		CNAG_01715	-	ribosome biogenesis protein BMS1	1
VTS1	_Y[Phospho (STY)]TPNFEKSNWNDMVLMTDQDLQDNGISAQGAR_	#N/A	#N/A	6.62987	0.0447183		CNAG_02032	-	nuclear export factor	1
CNAG_00172	_GLISQSGDSVGGNLS[Phospho (STY)]FDSKSPTSGSSR_	-	kinesin	6.62704	0.0220342		CNAG_02234	-	large subunit ribosomal protein L6e	1
CNAG_05663	_LGS[Phospho (STY)]QPGPAGGAYGR_	-	cell wall integrity protein scw1	6.62635	0.0163494		CNAG_06667	-	hypothetical protein	1
CNAG_05607	_SDT[Phospho (STY)]PNFSTNSNSLTNSSATLTVPMSGASK_	-	cytoplasmic protein	6.6245	0.0228061		CNAG_01179	-	DNA-directed RNA polymerase I and III subunit RPAC1	1
CNAG_02134	_ISTPADADSQQEQQQAEAT[Phospho (STY)]GQGVQTHDVASAPGK_	RSC8	rsc chromatin remodeling complex subunit	6.61901	0.0377164		CNAG_04949	-	hypothetical protein	1
CNAG_02992	_RASQQSALS[Phospho (STY)]PTPPTNK_	-	actin cross-linking protein	6.61652	0.0209624		CNAG_01574	-	hypothetical protein	1
CNAG_00497	_AGSSSPSTSGVIDSPSKS[Phospho (STY)]ISAR_	-	hypothetical protein	6.61599	0.0175311		CNAG_06560	-	esterase	1
CNAG_06588	_QST[Phospho (STY)]PLLQGTSNPSQPR_	-	hypothetical protein, variant	6.61206	0.0449664		CNAG_05907	-	pyruvate carboxylase	1
CNAG_00906	_SIGTVGSKGT[Phospho (STY)]IGMR_	-	nucleolar pre-ribosomal-associated protein 1, variant	6.61188	0.030342		CNAG_07817	-	centromeric protein E	1
CNAG_02606	_RPSMLSLAQNAS[Phospho (STY)]FLNEGSGGGER_	-	hypothetical protein	6.6118	0.0234342		CNAG_02319	-	hypothetical protein	1
CNAG_00778	_TSSFLSQS[Phospho (STY)]GR_	-	hypothetical protein	6.61093	0.0457821		CNAG_00044	-	ribosome assembly protein 1	1
CNAG_00983	_DASVAGT[Phospho (STY)]PAPMSLNGTLFKNDDPEEEGWIAK_	-	hypothetical protein	6.60913	0.0235231		CNAG_04051	-	ATP-dependent RNA helicase A	1
CNAG_00056	_GLSPNFDS[Phospho (STY)]VPSPQQR_	-	hypothetical protein	6.60818	0.0190954		CNAG_02108	-	GTPase activating protein	1
CNAG_05007	_GSS[Phospho (STY)]GMVT[Phospho (STY)]PR_	-	translation initiation factor eIF-2B subunit beta	6.6071	0.0333724		CNAG_02065	-	hypothetical protein, variant	1
CNAG_03479	_HPLLPGQTGGLRQSPSS[Phospho (STY)]PANLLASPVVSTAPSR_	-	hypothetical protein	6.60695	0.0159975		CNAG_03563	-	aspartate-tRNA(Asn) ligase	1
CNAG_00148	_SPIPSSTSLY[Phospho (STY)]APSHPSSTYNPVASPAQSPTYGMSPPSTNYFQSMPGPR_	-	hypothetical protein	6.60546	0.0146266		CNAG_02423	-	hypothetical protein	1
CNAG_03100	_ISNFRNPSPTPTT[Phospho (STY)]PK_	-	cytoplasmic protein	6.60525	0.013526		CNAG_03748	-	large subunit ribosomal protein L19	1
CNAG_00106	_SS[Phospho (STY)]AAAQWIQK_	TCO5	Two-component-like sensor kinase	6.60445	0.0233771		CNAG_07694	-	nicotinate (nicotinamide) nucleotide adenylyltransferase, variant	1
CNA1	_TPISSAIASGSPGSPGTPT[Phospho (STY)]S[Phospho (STY)]PSIGGPPLTAWRPGHGR_	#N/A	#N/A	6.60347	0.0324437		CNAG_06658	-	rhomboid family membrane protein	1
CNAG_05843	_SLSAGSNGSAPSGLAPIVSS[Phospho (STY)]PVIASNLGSAQGQDHPPTSVHSQTPAQQLAK_	-	translation initiation factor 4E	6.60184	0.014359		CNAG_01556	-	cytoplasmic protein	1
CNAG_01587	_RSTGTSASGS[Phospho (STY)]RSPHPLEYVEEDEAVPQR_	-	RNA polymerase-associated protein LEO1	6.60112	0.0407228		CNAG_02501	-	hypothetical protein	1
CNAG_03463	_HGNGYEHGM[Oxidation (M)]LASPPPVYQSEES[Phospho (STY)]LR_	-	hypothetical protein	6.60052	0.013432		CNAG_02561	-	spermine transporter	1
CNAG_04011	_RT[Phospho (STY)]NVGIWAC[Carbamidomethyl (C)]K_	-	large subunit ribosomal protein L37a	6.5997	0.01349		CNAG_00279	-	hypothetical protein	1
CNAG_04175	_DVKQDDEDENEEDS[Phospho (STY)]DDEAPEAVGM[Oxidation (M)]NAAHEAER_	-	hypothetical protein, variant	6.59946	0.0234164		CNAG_01510	-	hypothetical protein	1
CNAG_01012	_LTPSKVSSPLT[Phospho (STY)]R_	-	hypothetical protein	6.5955	0.0171558		CNAG_03172	-	hypothetical protein	1
CNAG_06751	_SVYDSPTS[Phospho (STY)]HLAFNAHGHR_	HLH3	hypothetical protein	6.59521	0.0162149		CNAG_00599	-	anion transporter	1
CNAG_07659	_Y[Phospho (STY)]DPPSESFAMADANNSPQHVSYATNDFAVAPPAAER_	-	hypothetical protein	6.59396	0.0372375		CNAG_00891	-	ATP-binding cassette, subfamily F, member 2	1
CNAG_02789	_AIGGSTTGTNTT[Phospho (STY)]GGLVPGGSGFISR_	-	nitrogen permease regulator 2	6.59395	0.0196486		CNAG_05621	-	folylpolyglutamate synthase	1
CNAG_01183	_TVT[Phospho (STY)]SPPTPAAR_	LSB1	hypothetical protein	6.59349	0.0415534		CNAG_03724	-	ribosomal RNA methyltransferase Nop2	1
CNAG_01616	_YLFNEDKAMT[Phospho (STY)]PLSQMQTTK_	-	hypothetical protein	6.59333	0.0434525		CNAG_00803	-	solute carrier family 24 (sodium/potassium/calcium exchanger), member 6	1
CNAG_04361	_ASVLSDNSS[Phospho (STY)]VTSKEGK_	-	hypothetical protein	6.59132	0.0220041		CNAG_06498	-	hypothetical protein	1
CNAG_04962	_PAET[Phospho (STY)]AMEEVTSEDNGDAATDAIPQAK_	-	hypothetical protein	6.58993	0.0459974		CNAG_05000	-	hypothetical protein	1
CNAG_04803	_KASAILSPFPNS[Phospho (STY)]PDPLAAAGAGLNTVGGPPPPGRS[Phospho (STY)]PQPGVIPPPPK_	SEC31	protein transporter sec31	6.58863	0.00968421		CNAG_06313	-	phosphoglucomutase, variant	1
CNAG_02094	_ADIQFVDY[Phospho (STY)]DNVRFHLSTPSSK_	ARC35	ARP2/3 complex 34 kDa subunit	6.58679	0.0254831		CNAG_00660	-	histone deacetylase HOS3	1
CNAG_00441	_TASAQLEGGVHGLNSY[Phospho (STY)]TKR_	IMD1	inosine-5'-monophosphate dehydrogenase	6.58394	0.0118531		CNAG_06123	-	leucine-tRNA ligase	1
CNAG_05410	_GHGEADIQSQSQNENQS[Phospho (STY)]RDR_	-	hypothetical protein	6.58309	0.0220266		CNAG_01480	-	large subunit ribosomal protein L12	1
CNAG_01150	_VPVEENGNIS[Phospho (STY)]DSGIDM[Oxidation (M)]AEPK_	-	omega-6 fatty acid desaturase (delta-12 desaturase)	6.5782	0.0345035		CNAG_01476	-	hypothetical protein	1
CNAG_06473	_DSES[Phospho (STY)]RS[Phospho (STY)]TSAHGHPVQFEEEPR_	-	hypothetical protein	6.57814	0.0381194		CNAG_07320	-	hypothetical protein	1
CNAG_06142	_LSS[Phospho (STY)]SSNVFLDTPMDK_	POL12	DNA polymerase alpha subunit B	6.57803	0.0358272		CNAG_05646	-	hypothetical protein	1
CNAG_04289	_S[Phospho (STY)]QNQLFESR_	-	hypothetical protein	6.57768	0.0161084		CNAG_04239	-	hypothetical protein	1
CNAG_07507	_SNS[Phospho (STY)]YEWR_	STE50	protein kinase regulator	6.57713	0.0143299		CNAG_03987	-	elongation factor 1 alpha-like protein	1
CNAG_05153	_ASS[Phospho (STY)]PAIQR_	GAT5	hypothetical protein	6.56691	0.0164675		CNAG_05930	-	hypothetical protein	1
CNAG_00287	_LAES[Phospho (STY)]SPRPTAADR_	-	cytoplasmic protein	6.56471	0.0166947		CNAG_02595	-	hypothetical protein, variant	1
CNAG_02432	_QPSHFPYQPQTPTTPASPAS[Phospho (STY)]PR_	-	hypothetical protein, variant	6.56244	0.03199		CNAG_02308	-	hypothetical protein	1
CNAG_00292	_TFDQNVTLGLVARPEDIS[Phospho (STY)]EEQPEGVPIVAADHK_	-	zinc finger protein	6.56184	0.0227499		CNAG_00589	-	5-formyltetrahydrofolate cyclo-ligase	1
CNAG_03017	_ASSPLGRAPS[Phospho (STY)]PAEGR_	-	transcription initiation factor TFIIF subunit alpha	6.55823	0.0369829		CNAG_01549	-	splicing factor 3a subunit 3	1
CNAG_04307	_WS[Phospho (STY)]FVRDGDEK_	URO1	Urate oxidase	6.55776	0.0159053		CNAG_02916	-	F-type H -transporting ATPase subunit F	1
CNAG_07522	_SIHNVATPPVS[Phospho (STY)]PPADTSRLPSTFELPESGPPSR_	-	hypothetical protein	6.55706	0.0343462		CNAG_06600	-	vesicle-fusing ATPase	1
CNAG_06352	_LSPPTTGTS[Phospho (STY)]RPAS[Phospho (STY)]VASSHR_	CGP1	CAP-Gly protein 1	6.55588	0.0144433		CNAG_05033	-	hypothetical protein	1
CNAG_03727	_SPISMMNGART[Phospho (STY)]PGLGSFTLNLPQGK_	-	hypothetical protein	6.54629	0.024427		CNAG_01189	-	DNA-directed RNA polymerase I subunit RPA1	1
CNAG_00928	_HHAEKES[Phospho (STY)]SPIDDGPFAGLSESAPNANSR_	-	peptidase	6.54598	0.0429127		CNAG_02879	-	chloride channel protein, nucleotide-sensitive, 1A	1
CNAG_02959	_AADAQAAEGQAS[Phospho (STY)]EGSEKDEDASEEGTAR_	CFT2	high-affinity iron transporter	6.54548	0.0270749		CNAG_02730	-	sorting nexin-41	1
CNAG_00682	_RPES[Phospho (STY)]RMDIADLDSHFDR_	-	kinesin	6.54068	0.0111545		CNAG_06542	-	hypothetical protein	1
CNAG_05634	_QSAVSSGPSS[Phospho (STY)]PS[Phospho (STY)]VNSPNRQAPDAPALQGGAPITPR_	-	protein phosphatase 2 (formerly 2A), regulatory subunit B'	6.54002	0.0219117		CNAG_07773	-	hypothetical protein	1
CNAG_03884	_NVGFHPNY[Phospho (STY)]SPEKSFLATAAASNAGAPSSPGLQQSSR_	-	hypothetical protein	6.53881	0.0468098		CNAG_01814	-	hypothetical protein	1
CNAG_01576	_ESVNPSS[Phospho (STY)]FPIHHPGIFGGS[Phospho (STY)]PVK_	-	hypothetical protein	6.53489	0.0451016		CNAG_02467	-	DNA repair/transcription protein MET18/MMS19	1
CNAG_01282	_S[Phospho (STY)]FQFGRSSLDLPDSVGISSSLPTTPSGQGVK_	-	hypothetical protein	6.53481	0.0345129		CNAG_05169	-	L-lactate dehydrogenase (cytochrome)	1
CNAG_06594	_S[Phospho (STY)]ALEENKPEGADVPEEQK_	-	oxysterol binding protein	6.5319	0.018792		CNAG_00326	-	hypothetical protein	1
CNAG_07375	_SIEPPTAPLS[Phospho (STY)]R_	-	guanyl-nucleotide exchange factor	6.52919	0.0137846		CNAG_03476	-	Spermidine synthase	1
CNAG_02488	_TKS[Phospho (STY)]PKPFFSK_	-	methionyl-tRNA formyltransferase	6.52875	0.0212089		CNAG_07482	-	SCF-associated factor 1	1
CNAG_02393	_YLRS[Phospho (STY)]PSSGLHSPSNAEAAAAVAQSAAAMR_	-	hypothetical protein	6.51658	0.0471664		CNAG_00663	-	hypothetical protein	1
CNAG_04656	_LDVPSAPKSPIVAVS[Phospho (STY)]K_	-	arginine-tRNA-protein transferase, variant	6.51463	0.0159874		CNAG_02183	-	anaphase-promoting complex subunit 1	1
CNAG_02712	_VGVT[Phospho (STY)]PVREEPEEPENEGLK_	BUD32	BUD32 protein kinase	6.51404	0.021411		CNAG_05559	-	hypothetical protein	1
CNAG_01742	_AST[Phospho (STY)]GSSSHEDDPEKGLR_	AQY1	aquaporin-associated protein	6.51392	0.0358056		CNAG_03668	-	hypothetical protein	1
CNAG_04587	_GGTSPSSRPPKLNALS[Phospho (STY)]PLQAFSPLQSMK_	-	hypothetical protein, variant	6.5135	0.0159015		CNAG_01414	-	hypothetical protein	1
CNAG_00545	_EISPIWAQS[Phospho (STY)]NNHPADGVIGMGSLSMAER_	SCC2	cohesin loading factor subunit SCC2	6.50839	0.03546		CNAG_01943	-	hypothetical protein	1
CNAG_07431	_S[Phospho (STY)]YGTASAPLGAHEGSWQASSVDGLGVGNSR_	-	MATE family multidrug resistance protein	6.50798	0.0133643		CNAG_03603	-	ATP-dependent RNA helicase HAS1	1
CNAG_02825	_FTGS[Phospho (STY)]TDPLMHEFNQSLK_	-	Argininosuccinate lyase	6.50335	0.0271599		CNAG_02230	-	phosphoketolase	1
CNAG_00717	_S[Phospho (STY)]SQSQGASQAEVDGR_	-	hypothetical protein	6.50301	0.0300219		CNAG_03607	-	hypothetical protein	1
CNAG_05255	_LQEAPNITLADIAPLET[Phospho (STY)]QIEDLRR_	FZC2	hypothetical protein	6.50274	0.0398839		CNAG_01541	-	hypothetical protein	1
CLR4	_SRPPTPPLPAT[Phospho (STY)]QSTPVTVSR_	#N/A	#N/A	6.50157	0.0143621		CNAG_00351	-	hypothetical protein	1
CNAG_02658	_SEWSS[Phospho (STY)]PVSR_	-	hypothetical protein	6.49935	0.0213074		CNAG_00604	-	hypothetical protein	1
CNAG_06363	_SST[Phospho (STY)]PLSVR_	-	Nucleolar protein	6.498	0.0480375		CNAG_05138	-	glucan 1,3-beta-glucosidase	1
CNAG_06165	_QHSNLTPERDREDGS[Phospho (STY)]Y[Phospho (STY)]FTQGFGTPSK_	-	sterility protein Ste20	6.49223	0.028521		CNAG_03083	-	cupin domain-containing protein	1
CNAG_00386	_TKPLAAEDDSREEGEEAQFEEEAAGTELS[Phospho (STY)]EGDIK_	-	translation initiation factor 4G	6.49106	0.0218841		CNAG_03507	-	mitochondrial-processing peptidase subunit beta	1
CNAG_05262	_EGY[Phospho (STY)]GEQPMSDVEEDASEEEPPIDHQASGSVTK_	-	hypothetical protein	6.48578	0.0158463		CNAG_08029	-	hypothetical protein	1
CNAG_05749	_ANPASS[Phospho (STY)]EDSLAC[Carbamidomethyl (C)]NQTDHSGPSR_	-	hypothetical protein	6.48548	0.0390772		CNAG_02874	-	hypothetical protein	1
CNAG_03727	_TDAPVPTIDDEDADEFLHVHPS[Phospho (STY)]PERR_	-	hypothetical protein	6.48458	0.0205394		CNAG_06713	-	cysteine-tRNA ligase	1
CNAG_01087	_FVLEEDKEEIEHHENLESS[Phospho (STY)]PNPAPM[Oxidation (M)]PTAAPVSTSASAPDGEHSVGEGPK_	-	hypothetical protein	6.47915	0.026597		CNAG_01565	-	biotin-[acetyl-CoA-carboxylase] ligase	1
CNAG_01376	_MPLGQSFGPPGLRPTYPAGSPAYSPPHANGSS[Phospho (STY)]ISPNPPPR_	-	stress response protein NST1, variant	6.47577	0.0165341		CNAG_04733	-	DNA repair protein rad5	1
CNAG_00184	_NALAINGVFYHAT[Phospho (STY)]C[Carbamidomethyl (C)]RAEQTSALK_	-	pre-mRNA cleavage complex 2 protein Pcf11	6.46843	0.0196931		CNAG_04851	-	transitional endoplasmic reticulum ATPase	1
CNAG_06158	_TTFGPEDEPNS[Phospho (STY)]PMSRFSFR_	-	hypothetical protein	6.46637	0.0231402		CNAG_06335	-	centromeric protein E	1
CNAG_06599	_AS[Phospho (STY)]IVPGLDDDS[Phospho (STY)]DS[Phospho (STY)]DESNGGFGM[Oxidation (M)]SPPVTM[Oxidation (M)]K_	-	hypothetical protein	6.46492	0.0459665		CNAG_01859	-	hypothetical protein	1
CNAG_06661	_SYSSFSPLS[Phospho (STY)]SLPGPQPTEESLRPFHVLK_	-	hypothetical protein	6.46403	0.0155658		CNAG_00635	-	cytoplasmic protein	1
CNAG_07631	_M[Oxidation (M)]AHPQPVQDSSVSQIVSGY[Phospho (STY)]HANPADTMAWAQQIHSNSVSPSLAAAK_	-	hypothetical protein	6.46134	0.0202517		CNAG_02013	-	hypothetical protein, variant	1
CNAG_04587	_SFVGLQIC[Carbamidomethyl (C)]TSPT[Phospho (STY)]NLT[Phospho (STY)]PTVPFER_	-	hypothetical protein, variant	6.45857	0.0242353		CNAG_05713	-	elongator complex protein 1	1
CNAG_01640	_YRLS[Phospho (STY)]EDDATQSPR_	CSF1	Cold sensitive for fermentation protein 1, putative	6.45231	0.0202788		CNAG_07690	-	hypothetical protein	1
CNAG_03357	_AAAAEFPPPSS[Phospho (STY)]PPRK_	-	hypothetical protein	6.45022	0.0321173		CNAG_01011	-	hypothetical protein	1
CNAG_04303	_VRENTLDDS[Phospho (STY)]PSPSAK_	-	E3 ubiquitin-protein ligase bre1	6.44856	0.040207		CNAG_00690	-	hypothetical protein	1
CUF1	_HSGHEFENPASAGAT[Phospho (STY)]PPGGGC[Carbamidomethyl (C)]C[Carbamidomethyl (C)]GSSVHSR_	#N/A	#N/A	6.44787	0.031381		CNAG_01479	-	hypothetical protein	1
CNAG_05864	_GSFDS[Phospho (STY)]TGGDRPLSSVSNGER_	-	hypothetical protein	6.4462	0.0166136		CNAG_05353	-	nuclear pore complex protein Nup133	1
CNAG_02993	_SPVSPSTDSAS[Phospho (STY)]ADIQAAFTSQDEK_	-	solute carrier family 39 (zinc transporter), member 7	6.44557	0.0167831		CNAG_04376	-	protein KRI1	1
CNAG_03702	_VDNIDPNY[Phospho (STY)]RPGEFTDESNLERFELSPEEYAAR_	ALF1	tubulin-folding cofactor B, variant	6.44544	0.0170474		CNAG_01485	-	D-lactate dehydrogenase (cytochrome)	1
CNAG_01251	_LNPPGEPESAADDTPATAAGVTSPSSSAPLSPT[Phospho (STY)]ALTTTER_	UFD4	E3 ubiquitin-protein ligase TRIP12	6.44387	0.0177673		CNAG_02240	-	cytoplasmic protein	1
CNAG_01526	_S[Phospho (STY)]TSSLAVVNSGGGGR_	-	cleavage and polyadenylation specificity factor subunit 4	6.4431	0.0271236		CNAG_03689	-	zf-C3HC4 type zinc finger protein	1
CNAG_06631	_STSGGSSGTKGYFFS[Phospho (STY)]PPDQEPSAPQSPTVAPKPR_	-	myosin heavy chain	6.44286	0.0157389		CNAG_07796	-	uroporphyrinogen-III C-methyltransferase	1
CNAG_04803	_S[Phospho (STY)]EAADSSVAATIGSR_	SEC31	protein transporter sec31	6.4397	0.0269428		CNAG_04719	-	solute carrier family 41	1
CNAG_00300	_TRPSSS[Phospho (STY)]ASIAQR_	SPC97	gamma-tubulin complex component 2	6.43728	0.0337482		CNAG_05860	-	sterol O-acyltransferase, variant	1
CNAG_03659	_ALRPTPT[Phospho (STY)]HVSDSTDDIFMLDAR_	-	DNA replication regulator DPB11	6.43504	0.0202383		CNAG_03591	-	rab GDP-dissociation inhibitor	1
CNAG_03267	_GS[Phospho (STY)]S[Phospho (STY)]RMSETPTDTESEAESTTSTVDLSTLEIDPSDPR_	-	splicing factor 3B subunit 2	6.43261	0.0459619		CNAG_08018	-	hypothetical protein	1
MDR1	_SSIAASS[Phospho (STY)]DTLRNSPLEKPISNAFSK_	#N/A	#N/A	6.43239	0.0190689		CNAG_03753	-	dolichol-phosphate mannosyltransferase	1
CNAG_01432	_C[Carbamidomethyl (C)]SATLTGHSS[Phospho (STY)]PILC[Carbamidomethyl (C)]C[Carbamidomethyl (C)]AQSPTGR_	RSA4	ribosome assembly protein 4, variant	6.43174	0.0377137		CNAG_00807	-	hypothetical protein	1
CNAG_04433	_T[Phospho (STY)]PSMPHNMASPSSR_	YAK103	CMGC/DYRK/DYRK2 protein kinase	6.43151	0.0202592		CNAG_02317	-	protein arginine N-methyltransferase 3	1
CNAG_05936	_HNAPLIMATC[Carbamidomethyl (C)]GSKGS[Phospho (STY)]VINVAQMVAC[Carbamidomethyl (C)]VGQQIIGGSR_	-	DNA-directed RNA polymerase III subunit RPC1	6.43139	0.0366292		CNAG_06681	-	hypothetical protein	1
CNAG_07491	_[Acetyl (Protein N-term)]MHFDEPIS[Phospho (STY)]PR_	-	glutaredoxin	6.42998	0.0207685		CNAG_03127	-	small subunit ribosomal protein S23	1
CNAG_04053	_ALS[Phospho (STY)]PSPPPSAPSSEPKPSIR_	-	hypothetical protein	6.42954	0.0238232		CNAG_01292	-	pol II transcription elongation factor	1
CNAG_01315	_QSTPAPPT[Phospho (STY)]ENSPVHAK_	-	protein transporter	6.42899	0.0367943		CNAG_02265	-	exportin-T	1
CNAG_05109	_KRPGS[Phospho (STY)]NAAQQSNGGK_	-	CBS and PB1 domain-containing protein	6.42783	0.0165923		CNAG_00458	-	hypothetical protein, variant	1
CNAG_01408	_GSS[Phospho (STY)]PLHVR_	-	PH and SEC7 domain-containing protein	6.42782	0.0328143		CNAG_04178	-	hypothetical protein	1
CNAG_00106	_SLVSHLTPPSHPSTTSESALGS[Phospho (STY)]SLR_	TCO5	Two-component-like sensor kinase	6.42396	0.018345		CNAG_03118	-	hypothetical protein	1
CNAG_03966	_NSSISTTS[Phospho (STY)]SLTR_	-	hypothetical protein	6.42182	0.0288949		CNAG_00194	-	hypothetical protein	1
CNAG_06427	_AHSPSSGC[Carbamidomethyl (C)]QIS[Phospho (STY)]APIS[Phospho (STY)]PPVGYPLSFYSGGR_	-	hypothetical protein	6.42103	0.044223		CNAG_01909	-	signal transducer	1
CNAG_03210	_ASEDVS[Phospho (STY)]ISPSKR_	-	SAGA-associated factor 73, variant	6.42049	0.0451092		CNAG_02004	-	OTU domain-containing protein 6B	1
CNAG_04594	_QEVPAVQYES[Phospho (STY)]PASQSSSSSSSATTNVTFPSAFPK_	FZC27	hypothetical protein	6.41852	0.014869		CNAG_02342	-	hypothetical protein	1
CNAG_07538	_ASS[Phospho (STY)]PIAEPEPEPDIESPNPR_	-	calcium/proton exchanger	6.41592	0.00927354		CNAG_00650	-	GRAM domain-containing protein	1
CNAG_07744	_SPYRS[Phospho (STY)]LPHSPSSSALGK_	PIK1	1-phosphatidylinositol 4-kinase	6.41547	0.0310702		CNAG_00638	-	GTPase	1
CNAG_05098	_FGGT[Phospho (STY)]REQGVR_	HUB1	ubiquitin-like protein 5	6.41492	0.029684		CNAG_02114	-	hypothetical protein	1
CNAG_07524	_LDKESTM[Oxidation (M)]LSPSGPEY[Phospho (STY)]GDLDPAPALAHR_	-	AMP deaminase	6.41264	0.0496987		CNAG_00328	-	DNA excision repair protein ERCC-5	1
CNAG_06019	_IPS[Phospho (STY)]APALHHR_	-	hypothetical protein, variant	6.41211	0.0155988		CNAG_00998	-	hypothetical protein	1
CNAG_03655	_RGVM[Oxidation (M)]AESQFANLPPLPPPPATPTAAGDTTPT[Phospho (STY)]KK_	-	hypothetical protein, variant	6.41114	0.0234783		CNAG_04202	-	cytosolic Fe-S cluster assembly factor NAR1	1
CNAG_07478	_LDIQSLLS[Phospho (STY)]PDQLEEYRVR_	-	hypothetical protein	6.40761	0.0154819		CNAG_04409	-	hypothetical protein	1
CNAG_03108	_NPSTRPISYPFSSPSPSS[Phospho (STY)]SSISYGSR_	-	hypothetical protein	6.4071	0.0288199		CNAG_06289	-	hypothetical protein	1
CNAG_02698	_KIHPSQQSHQLPVAVNQS[Phospho (STY)]LTSPK_	SGT1	hypothetical protein	6.40657	0.0096186		CNAG_02398	-	hypothetical protein	1
CNAG_01298	_EAAFNSRPDDEASSIS[Phospho (STY)]MSFHDSQGGASGGDRK_	-	lysophospholipase NTE1	6.40049	0.0134953		CNAG_00249	-	hypothetical protein	1
CNAG_06576	_VEDAPIVHEVTTLPTISADKY[Phospho (STY)]AK_	CAR1	cAMP-regulated gene 1	6.39611	0.0139564		CNAG_04771	-	rab family protein	1
CNAG_00008	_YFT[Phospho (STY)]KASPIDIASWHR_	-	hypothetical protein	6.39167	0.016686		CNAG_06545	-	pim1 protein RNA transporter 2	1
CNAG_05181	_QY[Phospho (STY)]SHHPSPQISSSPHTPADQR_	BWC1	white collar 1 protein	6.38949	0.0407187		CNAG_03484	-	kinetochore protein Mis13/DSN1	1
CNAG_06666	_RSS[Phospho (STY)]LS[Phospho (STY)]AGHPHSFK_	-	starch phosphorylase	6.38824	0.0136255		CNAG_07765	-	hypothetical protein	1
CNAG_06151	_SPSAPATTSNIS[Phospho (STY)]DR_	YPD1	osomolarity two-component system, phosphorelay intermediate protein YPD1	6.38557	0.0166194		CNAG_00127	-	hypothetical protein	1
CNAG_04786	_APTAAS[Phospho (STY)]PREPSR_	-	hypothetical protein, variant	6.38555	0.0467594		CNAG_05717	-	hypothetical protein	1
CNAG_06192	_SGSVRS[Phospho (STY)]PYGSPQDGR_	-	hypothetical protein	6.38196	0.0253949		CNAG_00423	-	kinetochore protein Spc24, fungi type	1
CNAG_00426	_SPAVSQPTIS[Phospho (STY)]RPSPS[Phospho (STY)]PKPQPK_	-	UBA/TS-N domain-containing protein	6.38078	0.0298234		CNAG_04210	-	MFS transporter, SP family, general alpha glucoside:H symporter	1
CNAG_05272	_T[Phospho (STY)]RSAQPGDISIAR_	-	hypothetical protein, variant	6.38	0.0323631		CNAG_00634	-	hypothetical protein	1
CNAG_01023	_EVVTPIS[Phospho (STY)]R_	SCC1	cohesin complex subunit SCC1	6.37949	0.0135094		CNAG_05366	-	translation initiation factor 2A	1
CNAG_01335	_RNSEANS[Phospho (STY)]PMLTPMNR_	-	hypothetical protein	6.37904	0.0449495		CNAG_05665	-	hypothetical protein	1
CNAG_03409	_QPTTMPYTPAQPQSHQSFLNAAYNPAFSGSSVGGAAQAQAS[Phospho (STY)]PHTDGTGSR_	SKN7	osomolarity two-component system, response regulator SKN7	6.37738	0.00897561		CNAG_04721	-	hypothetical protein	1
CNAG_05671	_SRPTAES[Phospho (STY)]VPHVR_	-	oxidation resistance protein 1	6.37602	0.049584		CNAG_07689	-	pre-mRNA-splicing factor cwc22	1
CNAG_03669	_IGQHHAQLIEY[Phospho (STY)]FLDR_	-	hypothetical protein	6.37225	0.0191695		CNAG_02156	-	hypothetical protein	1
CNAG_04120	_GKGEETTTPPGSPGPS[Phospho (STY)]ALSVTVEQPK_	FCP1	RNA polymerase II subunit A domain phosphatase	6.36969	0.0499343		CNAG_05820	-	tryptophan aminotransferase	1
CNAG_03720	_C[Carbamidomethyl (C)]AS[Phospho (STY)]AAEDKIDKLSVNENTSSR_	-	D-tyrosyl-tRNA(Tyr) deacylase, variant	6.36075	0.0195315		CNAG_05479	-	Fungal specific transcription factor, putative	1
CNAG_01640	_Y[Phospho (STY)]RLSEDDATQSPR_	CSF1	Cold sensitive for fermentation protein 1, putative	6.35354	0.0162083		CNAG_00808	-	myosin regulatory light chain cdc4	1
CNAG_05499	_DSTPGY[Phospho (STY)]GGGEMGLGNSIGGMPR_	-	SHO1 osmosensor	6.34764	0.0112228		CNAG_00532	-	hypothetical protein	1
CNAG_00337	_GS[Phospho (STY)]PFSSATTASETR_	-	hypothetical protein	6.34534	0.0160797		CNAG_04142	-	tartrate transporter	1
AFR1	_KYSNLS[Phospho (STY)]QR_	#N/A	#N/A	6.34464	0.0222195		CNAG_00687	-	hypothetical protein, variant	1
CNAG_00106	_SRPDSGRGTHAHT[Phospho (STY)]LMDLEK_	TCO5	Two-component-like sensor kinase	6.34342	0.0174194		CNAG_02218	-	hypothetical protein	1
CNAG_06576	_VEDAPIVHEVTTLPT[Phospho (STY)]ISADKYAK_	CAR1	cAMP-regulated gene 1	6.34267	0.0162645		CNAG_03623	-	malonic semialdehyde reductase	1
CNAG_03886	_AAPSPTPS[Phospho (STY)]VQGSEAGK_	-	hypothetical protein	6.33989	0.0170905		CNAG_02129	-	hypothetical protein	1
CNAG_04772	_GSYETGYGGPPSGPSPGRY[Phospho (STY)]HDAPPAPASVTEDRLEQALR_	-	hypothetical protein	6.33895	0.0111968		CNAG_07808	-	alanine-glyoxylate transaminase/serine- glyoxylate transaminase/serine-pyruvate transaminase	1
CNAG_06732	_SATPMPETKPQPSSIPVLS[Phospho (STY)]FGQEDVVLR_	ATG2	hypothetical protein	6.33886	0.0228		CNAG_02943	-	cytoplasmic protein	1
CNAG_03023	_TSTISSSPT[Phospho (STY)]PNSISRPSR_	-	hypothetical protein	6.33877	0.0296117		CNAG_00142	-	hypothetical protein	1
CNAG_02930	_STPTFDS[Phospho (STY)]RPGNGRTTPTLK_	LIV10	virulence related protein of unknown function	6.33875	0.0372552		CNAG_06030	-	hypothetical protein	1
CNAG_00625	_ASFSSITPPLSSNASSTQY[Phospho (STY)]SVLGDPLHTHK_	-	ARF guanyl-nucleotide exchange factor	6.33092	0.015775		CNAG_03061	-	multiple drug resistance protein	1
CNAG_06916	_GS[Phospho (STY)]PAPGGFGVGLGGGGM[Oxidation (M)]GLGSGSGLGLGGK_	-	hypothetical protein	6.33049	0.0211691		CNAG_07800	-	syntaxin-binding protein 1	1
CNAG_01094	_Y[Phospho (STY)]HDSPSPSSDYYDDRYR_	-	pre-mRNA-splicing factor CWC25	6.32635	0.0296285		CNAG_03063	-	hypothetical protein, variant	1
CNAG_07951	_LTDVEDLFEDS[Phospho (STY)]DEDDEMEEDEPDSDEEKS[Phospho (STY)]K_	0	WD-repeat protein JIP5	6.32466	0.0308351		CNAG_06728	-	kinesin	1
CNAG_04321	_EEPPAS[Phospho (STY)]PIPIVNMEAATDPDAEYHAADLTQAER_	-	hypothetical protein	6.32402	0.0224511		CNAG_04028	-	RNA binding protein, variant	1
CNAG_07794	_LSNASSLAGNVGSVGVS[Phospho (STY)]ASPK_	-	hypothetical protein	6.32234	0.0239825		CNAG_01120	-	pyruvate dehydrogenase complex dihydrolipoamide acetyltransferase	1
CNAG_01282	_SFQFGRSS[Phospho (STY)]LDLPDSVGISSSLPTTPSGQGVK_	-	hypothetical protein	6.32033	0.0241164		CNAG_02520	-	DNA-directed RNA polymerase III subunit RPC4	1
CNAG_05253	_IPSLSQPYC[Carbamidomethyl (C)]SSSLYT[Phospho (STY)]PGPNNR_	-	hypothetical protein	6.31693	0.0123392		CNAG_06830	-	Histidinol dehydrogenase	1
CNAG_00363	_SS[Phospho (STY)]PGQKYSSISPNHK_	TCO6	Two-component-like sensor kinase	6.31329	0.0480505		CNAG_02428	-	GC-rich sequence DNA-binding factor	1
CNAG_02866	_RIVVDTTGAQIVQEES[Phospho (STY)]PATR_	CAB1	Pantothenate kinase	6.3095	0.0162785		CNAG_05725	-	ketol-acid reductoisomerase, mitochondrial	1
CNAG_05889	_Y[Phospho (STY)]GSPSYDFSPR_	-	hypothetical protein	6.3078	0.0245832		CNAG_03898	-	phosphoadenosine phosphosulfate reductase	1
CNAG_00241	_SSLPTPT[Phospho (STY)]HSR_	-	protein AIR1/2	6.3012	0.0220909		CNAG_03891	-	hsp60-like protein	1
CNAG_02168	_SESPT[Phospho (STY)]PPGKIPSSSSGQDLASVSR_	-	Glucoamylase	6.30003	0.0108592		CNAG_01234	-	spore wall assembly-associated protein	1
CNAG_00184	_SGIGS[Phospho (STY)]QPQTPDVER_	-	pre-mRNA cleavage complex 2 protein Pcf11	6.29906	0.040319		CNAG_00471	-	mitochondrial protein	1
CNAG_03456	_VLATSDEALY[Phospho (STY)]EEGAEEVDFSK_	-	hypothetical protein	6.29391	0.0244301		CNAG_06007	-	U3 small nucleolar RNA-associated protein 23	1
CNAG_04132	_SQGYQAGREY[Phospho (STY)]NIWYNK_	-	pre-mRNA-splicing factor CWC2, variant	6.2937	0.0386474		CNAG_03308	-	hypothetical protein	1
CNAG_00520	_TVQNSLLFASPVERHISPAPS[Phospho (STY)]IVSAGYLDGR_	-	hypothetical protein	6.29328	0.0376684		CNAG_01835	-	hypothetical protein	1
CNAG_04318	_APSPTPEY[Phospho (STY)]LDEIAADPSLGLDEANKK_	-	telomere length regulation protein	6.28945	0.0114099		CNAG_05074	-	hypothetical protein	1
CNAG_03360	_TPPAHAPVS[Phospho (STY)]NDGGSGGWDQR_	-	hypothetical protein	6.28663	0.015311		CNAG_02455	-	choline transporter	1
CNAG_06325	_WVSILPS[Phospho (STY)]DEDEPDPFEGMADDEDEEAGGGTIR_	BYR4	GTPase activator	6.28323	0.0222345		CNAG_03718	-	mitochondrial intermediate peptidase 2	1
CSN1S1	_EKVNELSKDIGS[Phospho (STY)]ES[Phospho (STY)]T[Phospho (STY)]EDQAM[Oxidation (M)]EDIK_	#N/A	#N/A	6.28245	0.0408411		CNAG_03543	-	hypothetical protein, variant	1
CNAG_01408	_ILLPISGIPGNDRNVS[Phospho (STY)]GSSNR_	-	PH and SEC7 domain-containing protein	6.28173	0.0203055		CNAG_03533	-	JmjC domain-containing histone demethylation protein 1	1
CNAG_05706	_LS[Phospho (STY)]PGQGQSR_	-	hypothetical protein	6.28104	0.0377395		CNAG_05963	-	hypothetical protein	1
CNAG_01335	_GNMAQGDRADDTMDVEMRGS[Phospho (STY)]PGYHGSSTEAPR_	-	hypothetical protein	6.28061	0.0382279		CNAG_03189	-	DIL and Ankyrin domain-containing protein	1
CNAG_02071	_QSS[Phospho (STY)]SYSSQDEETNNRPR_	BNI4	putative scaffold protein	6.27756	0.020462		CNAG_04222	-	protein SDA1	1
CNAG_06294	_QTSFQALTEPILFAGAS[Phospho (STY)]PGATSHGKHR_	-	hypothetical protein	6.27289	0.03579		CNAG_00923	-	membrane protein	1
CNAG_01415	_VQDTPDAEDKDLGS[Phospho (STY)]SLK_	-	cytoplasmic protein	6.27113	0.014974		CNAG_01101	-	hypothetical protein	1
CNAG_01150	_NASGLAQRVPVEENGNISDS[Phospho (STY)]GIDMAEPK_	-	omega-6 fatty acid desaturase (delta-12 desaturase)	6.26762	0.0166284		CNAG_03008	-	hypothetical protein	1
CNAG_07978	_PSSMISSSSSSLT[Phospho (STY)]NPFRR_	-	hypothetical protein	6.26717	0.0462462		CNAG_06531	-	hypothetical protein, variant	1
CNAG_06971	_SRDVPPSPST[Phospho (STY)]GHGFR_	MYO2alpha	myosin class v heavy chain	6.26475	0.0342845		CNAG_04634	-	hypothetical protein	1
CNAG_00773	_S[Phospho (STY)]RPSRSQLLAIGDGSGSTDNYGGDEVAR_	-	hypothetical protein	6.26473	0.0195596		CNAG_01791	-	ribosome production factor 1	1
CNAG_06766	_KPTKPLT[Phospho (STY)]VNLDESDGEASEK_	-	U3 small nucleolar RNA-associated protein 14	6.26229	0.0193623		CNAG_06610	-	MFS transporter	1
CNAG_01143	_TTRGDGYSS[Phospho (STY)]PPAGPSNPR_	-	hypothetical protein	6.26182	0.0115549		CNAG_01031	-	hypothetical protein	1
CNAG_01815	_VKS[Phospho (STY)]NAFPSGLTNSEAGSPVAVDPPR_	-	hypothetical protein	6.25876	0.0348368		CNAG_02063	-	hypothetical protein	1
CNAG_02994	_GINVASLEKVDAATDATSPQGS[Phospho (STY)]APPASAVAALDEK_	-	hypothetical protein, variant	6.25691	0.0180603		CNAG_01440	-	hypothetical protein	1
CNAG_03319	_DETGFVYSDES[Phospho (STY)]EDEEEDFGKGLPLVTK_	-	phospholipid binding protein	6.25651	0.0211683		CNAG_03587	-	hypothetical protein	1
CNAG_00558	_RSSVGADGLALDQAS[Phospho (STY)]GGISDDIR_	-	hypothetical protein	6.25583	0.0333796		CNAG_02298	-	niemann-Pick C1 protein	1
CNAG_04213	_RSSQQY[Phospho (STY)]SEGLSVAGEEYDKER_	-	signal transducer	6.25361	0.0323082		CNAG_06908	-	pyridoxal biosynthesis lyase pdxS	1
CNAG_05415	_GPPARPGQGQPVPQGY[Phospho (STY)]ASASPAGQSQR_	-	hypothetical protein	6.252	0.0308424		CNAG_02527	-	multidrug transporter, variant	1
CNAG_06087	_SGIQT[Phospho (STY)]AAEVAKR_	SPC105	kinetochore protein Spc7/SPC105	6.25165	0.019195		CNAG_05228	-	U3 small nucleolar ribonucleoprotein Lcp5	1
CNAG_01765	_SGSDS[Phospho (STY)]DYSPPYSLR_	-	hypothetical protein, variant	6.24855	0.0324859		CNAG_01608	-	nuclear GTP-binding protein, variant	1
CNAG_01669	_NQS[Phospho (STY)]ISDLANLSIS[Phospho (STY)]PHAAGR_	-	metallo-beta-lactamase	6.24854	0.011224		CNAG_00809	-	ATP-dependent RNA helicase DED1	1
CNAG_06327	_KSNGGS[Phospho (STY)]PVGT[Phospho (STY)]PGGPYGFSNERER_	MIG1	DNA-binding protein creA, variant	6.24571	0.0275029		CNAG_05891	-	TDG/mug DNA glycosylase	1
CNAG_02091	_QAIVKGEAEPTESEVEAGQAS[Phospho (STY)]DLEDSDVEDEEEKK_	NAP1	Nucleosome assembly protein 1	6.24426	0.0227967		CNAG_00703	-	large subunit ribosomal protein L31e	1
ADK1	_STSTSVSNTISSVT[Phospho (STY)]SALSPSSSSKPPR_	#N/A	#N/A	6.24213	0.0372301		CNAG_00837	-	hypothetical protein	1
CNAG_05452	_IGGNT[Phospho (STY)]PVGS[Phospho (STY)]PNPEAAPVITSESGTDVTK_	-	hypothetical protein	6.23575	0.0111498		CNAG_06533	-	ATP-dependent permease	1
CNAG_01130	_[Acetyl (Protein N-term)]AVESVPVQPQAVSPT[Phospho (STY)]EAHIEKDALK_	-	hypothetical protein	6.23407	0.012434		CNAG_05496	-	2-isopropylmalate synthase	1
CNAG_06332	_GTSVTETVGT[Phospho (STY)]VPITPEEGVSLR_	-	hypothetical protein	6.23351	0.0161871		CNAG_05383	-	hypothetical protein, variant 2	1
CNAG_04535	_SPVRVPSHGDGWAST[Phospho (STY)]PETK_	-	Tartrate dehydrogenase	6.23341	0.0418103		CNAG_06675	-	hypothetical protein	1
PAN2	_LGLPQWAS[Phospho (STY)]QNSPSPLR_	#N/A	#N/A	6.23091	0.0180189		CNAG_03002	-	hypothetical protein	1
CNAG_00780	_QANLASPDPLDS[Phospho (STY)]LAK_	-	hypothetical protein	6.22959	0.0480258		CNAG_04147	-	ATP-dependent rRNA helicase RRP3	1
CNAG_07551	_LSSTGGTPPMSDWETDEDELIAVGKGTRPVT[Phospho (STY)]PVGGR_	-	hypothetical protein, variant	6.22862	0.0391215		CNAG_02164	-	hypothetical protein	1
CNAG_05741	_NKVAAGVVSS[Phospho (STY)]APHIVPTISAPPTR_	-	hypothetical protein, variant	6.22857	0.0296694		CNAG_06155	-	hypothetical protein	1
CNAG_03818	_SPAAPVSTPRLNLQS[Phospho (STY)]ATPDRPETPPDSTSQMPK_	SSK1	osomolarity two-component system, response regulator SSK1	6.22507	0.0251063		CNAG_00010	-	cation transporter	1
CNAG_00051	_VQVSTPIESQAQQQIDAPVQARPEVY[Phospho (STY)]NKPR_	SNT1	putative set3c deacetylase complex subunit	6.22439	0.0418819		CNAG_01552	-	blocked early in transport 1	1
CNAG_03463	_AEAS[Phospho (STY)]PTPGESEFHTPLSSPK_	-	hypothetical protein	6.22372	0.0122137		CNAG_03714	-	microtubule motor protein	1
CNAG_02468	_TGELPEGVS[Phospho (STY)]ALQIRTPSSR_	-	AP-3 complex subunit delta-1	6.2231	0.0161799		CNAG_01419	-	hypothetical protein	1
CNAG_03655	_S[Phospho (STY)]PLGEMFVNENDELREK_	-	hypothetical protein, variant	6.22278	0.0481564		CNAG_00260	-	transformer-2 protein	1
CNAG_06828	_QGSGSLSRPS[Phospho (STY)]VSRGDSGTSTLR_	-	solute carrier family 36 (proton-coupled amino acid transporter)	6.22137	0.0113913		CNAG_02383	-	trimethylguanosine synthase	1
CNAG_02393	_QHPSIASIMSDIESNS[Phospho (STY)]GSLR_	-	hypothetical protein	6.22104	0.0155774		CNAG_07322	-	hypothetical protein	1
CNAG_03186	_APVPLTTGS[Phospho (STY)]PVFSRESPR_	-	THO complex subunit 4	6.22031	0.0257846		CNAG_01185	-	Hsp70-like protein	1
CNAG_01330	_T[Phospho (STY)]ASQTVENR_	-	hypothetical protein	6.21709	0.0117845		CNAG_05459	-	pi-transporter A-1	1
CNAG_04199	_PFPS[Phospho (STY)]PHLGR_	-	hypothetical protein	6.2109	0.0184067		CNAG_07706	-	hypothetical protein	1
CNAG_01000	_YLTPLQAPQSLESVSKDEDPIY[Phospho (STY)]GPLGR_	-	nuclear pore complex protein Nup155	6.21079	0.0291932		CNAG_00845	-	hypothetical protein	1
CNAG_02001	_IEEEEES[Phospho (STY)]QEHVVEQGR_	INP5203	inositol-polyphosphate 5-phosphatase	6.21069	0.0188817		CNAG_00269	-	Sorbitol dehydrogenase	1
CNAG_05485	_KLEQPS[Phospho (STY)]VSGSDNVAPANSPPK_	-	tRNA (adenine-N(1)-)-methyltransferase catalytic subunit trm61	6.20955	0.0177589		CNAG_00091	-	hypothetical protein	1
CNAG_04538	_EGSSSIQASLSLPAS[Phospho (STY)]PSTTPTPPQAVGWER_	ATG7	ubiquitin-like modifier-activating enzyme ATG7	6.20633	0.0393952		CNAG_02766	-	hypothetical protein	1
CNAG_00377	_APT[Phospho (STY)]SNKNASEVYQK_	TOP2	DNA topoisomerase II, variant	6.20504	0.0267037		CNAG_04444	-	splicing factor 3B subunit 1	1
CNAG_00818	_GRPVRS[Phospho (STY)]PSSQGISSVGPVWNTAVNSSESTSTNTQQK_	-	hypothetical protein	6.20303	0.0223513		CNAG_05921	-	2-acylglycerol O-acyltransferase 2	1
CNAG_00043	_FGPGPGSGSGIGS[Phospho (STY)]R_	-	hypothetical protein, variant	6.20241	0.042394		CNAG_03791	-	CAMKK/ELM protein kinase	1
CNAG_06896	_DVPS[Phospho (STY)]PPST[Phospho (STY)]LSPPSSIPTTASSNPR_	-	cytoplasmic protein	6.19823	0.0381047		CNAG_00144	-	hypothetical protein, variant	1
CNAG_07483	_TSDVPLSATLLNAPS[Phospho (STY)]GKPALSPTFQDPSANLFHER_	-	DNA polymerase zeta subunit	6.1971	0.0172717		CNAG_06367	-	U3 small nucleolar RNA-associated protein 3	1
CNAG_03989	_SASVSLGSIGSDRSSETSLS[Phospho (STY)]ASIVK_	-	hypothetical protein	6.19681	0.0273428		CNAG_05539	-	hypothetical protein	1
CNAG_07502	_SQS[Phospho (STY)]VEGVR_	-	CTP synthase	6.19544	0.0254463		CNAG_01422	-	endoplasmic reticulum protein	1
CNAG_06339	_TGS[Phospho (STY)]TPAEGIK_	FZC35	hypothetical protein	6.19477	0.0443076		CNAG_03873	-	hypothetical protein, variant	1
CNAG_03966	_DRPNFST[Phospho (STY)]PTSHK_	-	hypothetical protein	6.19242	0.0157896		CNAG_00021	-	S-adenosylmethionine decarboxylase proenzyme	1
CNAG_03502	_SIPVSSPNILT[Phospho (STY)]PSRSTGPPSVAHR_	ALR2	magnesium transporter	6.1913	0.0174558		CNAG_01306	-	chromodomain-helicase-DNA-binding protein 3, variant	1
CNAG_05516	_QTDVGSVAASRS[Phospho (STY)]PRPK_	-	hypothetical protein, variant	6.19055	0.0466559		CNAG_02720	-	nuclear GTP-binding protein	1
CNAG_00817	_NDVTDEWERLPVQPAGS[Phospho (STY)]PQLEAGASR_	-	hypothetical protein	6.18991	0.0112429		CNAG_04879	-	Glycogen debranching enzyme	1
CNAG_05083	_NFNT[Phospho (STY)]AEES[Phospho (STY)]GVSTPVTPNTIITPIDPADPDKHNK_	-	esterase/lipase	6.18886	0.0400312		CNAG_01481	-	hypothetical protein	1
CNAG_03841	_GSASDSPLPSPVTSAALNPPS[Phospho (STY)]RTTPK_	-	hypothetical protein	6.18843	0.0309277		CNAG_00984	-	glucose and ribitol dehydrogenase	1
CNAG_02940	_LAEEGTTPET[Phospho (STY)]SNPPSGVPEEGFAAQQGGLSR_	-	calcium/proton exchanger	6.18265	0.0219571		CNAG_07469	-	nuclear pore complex protein Nup98-Nup96	1
CNAG_01296	_LKVGS[Phospho (STY)]YGDR_	-	RNA polymerase I-specific transcription initiation factor RRN3	6.18182	0.0412787		CNAG_05103	-	transcription initiation factor TFIIF subunit beta	1
CNAG_03345	_ADAPTFTPSFQSFS[Phospho (STY)]PVASTSGLSVSPNNTM[Oxidation (M)]PTLAQLHPR_	SSD1	putative translational repressor	6.18129	0.0314669		CNAG_01263	-	vacuolar transporter chaperone 4	1
CNAG_05940	_RPATAGGALQSRS[Phospho (STY)]PYSNFMMSSK_	ZFC3	hypothetical protein	6.18097	0.01664		CNAG_00496	-	hypothetical protein	1
CNAG_04838	_AVADGDTSLDT[Phospho (STY)]PKLNLAGGGPIVSGR_	-	hypothetical protein	6.17964	0.0384038		CNAG_01124	-	hypothetical protein	1
CNAG_04443	_NTEC[Carbamidomethyl (C)]C[Carbamidomethyl (C)]PPQSNSNPS[Phospho (STY)]KPNVPHPTSDPIGYK_	-	hypothetical protein	6.17912	0.0145155		CNAG_01365	-	hypothetical protein	1
CNAG_02109	_VY[Phospho (STY)]DTQLSDHAISVVDLKETGLESR_	INP5201	type I inositol-1,4,5-trisphosphate 5- phosphatase 1	6.17686	0.0115009		CNAG_03445	-	hypothetical protein	1
CNAG_05250	_PTSSSDSVKPPS[Phospho (STY)]PGGSR_	-	telomere maintenance protein	6.17269	0.0440268		CNAG_02977	-	metal resistance protein YCF1	1
CNAG_04119	_AGLLS[Phospho (STY)]RS[Phospho (STY)]PAASPTY[Phospho (STY)]DTMSSPTTPTC[Carbamidomethyl (C)]DMSFHPR_	ROM2	rho guanyl-nucleotide exchange factor	6.17182	0.0283613		CNAG_05076	-	hypothetical protein	1
CNAG_01354	_[Acetyl (Protein N-term)]S[Phospho (STY)]AEKLEAANALSNASDSK_	-	hypothetical protein	6.1714	0.018894		CNAG_04703	-	DNA clamp loader	1
CNAG_02605	_[Acetyl (Protein N-term)]THPIQPPTRPHSANPLTLNPSLS[Phospho (STY)]IFPR_	-	tbc1 domain family protein	6.17078	0.0112776		CNAG_06405	-	hypothetical protein	1
CNAG_05030	_NRPGPEPKSEAS[Phospho (STY)]ASASVSPSTAPGPAIAAR_	-	zinc finger protein 830, variant	6.16781	0.025719		CNAG_00904	-	aflatoxin efflux pump AFLT	1
CNAG_06828	_SISIS[Phospho (STY)]RNS[Phospho (STY)]PNINSGGT[Phospho (STY)]PPVPNIPSR_	-	solute carrier family 36 (proton-coupled amino acid transporter)	6.16692	0.0228822		CNAG_00330	-	transcription factor TFIIIB component b''	1
CNAG_05610	_SSGQGSTVDIKS[Phospho (STY)]DGLGSGR_	-	hypothetical protein	6.16516	0.0343269		CNAG_02178	-	hypothetical protein	1
CNAG_01143	_TTRGDGY[Phospho (STY)]SSPPAGPSNPR_	-	hypothetical protein	6.16442	0.0162773		CNAG_06024	-	peroxin-14	1
CNAG_02912	_HATGDVPHDKSESSHASEDLNDEVT[Phospho (STY)]PTLSQKEWFGEQSIK_	-	hypothetical protein	6.16351	0.0296513		CNAG_03217	-	hypothetical protein	1
CNAG_01183	_S[Phospho (STY)]GFSNVTSSK_	LSB1	hypothetical protein	6.16202	0.0415578		CNAG_01375	ABP1	Putative actin-binding protein	1
CNAG_03251	_LGLHS[Phospho (STY)]LR_	ARF2	ADP-ribosylation factor	6.16092	0.0154314		CNAG_02489	ADH1	alcohol dehydrogenase, propanol-preferring	1
CNAG_01715	_GGDT[Phospho (STY)]PQGEGEKMVMDLQDAEK_	-	ribosome biogenesis protein BMS1	6.15884	0.0257264		CNAG_03120	AGS1	alpha-1,3-glucan synthase	1
CNAG_04150	_STPIRPLS[Phospho (STY)]TPSPSR_	-	hypothetical protein	6.15852	0.00699065		CNAG_03702	ALF1	tubulin-folding cofactor B, variant	1
CNAG_03729	_AQLAQLPVNQS[Phospho (STY)]PK_	-	peroxin-5, variant	6.15647	0.0405291		CNAG_00235	AMT1	amt family ammonium transporter	1
CNAG_02032	_TAS[Phospho (STY)]TLGTPPLFSFSPSQPAK_	-	nuclear export factor	6.15614	0.0089913		CNAG_05468	APN1	AP endonuclease 1	1
CNAG_02234	_TET[Phospho (STY)]PAFTEK_	-	large subunit ribosomal protein L6e	6.15422	0.0242806		CNAG_00383	APT3	Aminophospholipid translocase, putative	1
CNAG_06158	_ASSFVANPQAGGSMT[Phospho (STY)]R_	-	hypothetical protein	6.15349	0.0137423		CNAG_02094	ARC35	ARP2/3 complex 34 kDa subunit	1
CNAG_07815	_AGPPIPTAVSRDVLLSY[Phospho (STY)]SPLPR_	-	hypothetical protein	6.15347	0.0112944		CNAG_05878	ARC40	hypothetical protein	1
CNAG_02313	_IDS[Phospho (STY)]PAPSAEGLLVDRTQGR_	SM2	hypothetical protein	6.15242	0.0311803		CNAG_03251	ARF2	ADP-ribosylation factor	1
CNAG_07665	_VNPSVAYSYAPTPSPSY[Phospho (STY)]NHPSSQVR_	-	hypothetical protein	6.15176	0.0155597		CNAG_03843	ARK1	NAK protein kinase, variant	1
CNAG_06667	_AHSS[Phospho (STY)]PPLAK_	-	hypothetical protein	6.14707	0.0192826		CNAG_04398	ARO80	specific RNA polymerase II transcription factor	1
CNAG_07941	_ASGMGPALQVTEWSTFNGNVNLPGPS[Phospho (STY)]KPR_	-	hypothetical protein, variant	6.1447	0.0252735		CNAG_03018	ASG101	Putative zinc finger transcription factor	1
CNAG_02962	_QLSTSSSNPTPM[Oxidation (M)]ATHEPS[Phospho (STY)]LASTPLGR_	-	CMGC/DYRK/PRP4 protein kinase	6.14376	0.0241834		CNAG_02161	ASP1	Inositol heptakisphosphate kinase	1
CNAG_01258	_DGSTAMGDSSAHSSY[Phospho (STY)]AGSTVPSEHPGSPLSSNR_	-	hypothetical protein	6.14319	0.0220521		CNAG_02662	ATG4	cysteine protease atg4	1
CNAG_00083	_ASLT[Phospho (STY)]SVSAGTPSESPAPVAGPSR_	CCC1	hypothetical protein	6.13983	0.026041		CNAG_04538	ATG7	ubiquitin-like modifier-activating enzyme ATG7	1
CNAG_04788	_GSLLLPASSQAGS[Phospho (STY)]PVRSPLQEFTPVR_	-	hypothetical protein	6.13896	0.0418804		CNAG_03325	BCH1	ChAPs family protein	1
CNAG_01591	_ASSMGGNLQPPQLGVSSPFAQS[Phospho (STY)]R_	-	hypothetical protein	6.13771	0.0203331		CNAG_02712	BUD32	BUD32 protein kinase	1
CNAG_03771	_PQS[Phospho (STY)]AFGHRPQPQLLAINEGQGDYQQQDGRDSR_	-	DNA binding protein Ncp1, variant	6.13439	0.0337505		CNAG_07940	BZP5	hypothetical protein, variant	1
CNAG_06142	_ATPSHLATPQRQS[Phospho (STY)]PLPPTASSYRPNPSK_	POL12	DNA polymerase alpha subunit B	6.12953	0.0338303		CNAG_01489	CAS9	maltose O-acetyltransferase	1
CNAG_01765	_S[Phospho (STY)]GSDSDYSPPYSLR_	-	hypothetical protein, variant	6.12759	0.0143421		CNAG_05023	CAS91	maltose O-acetyltransferase	1
CNAG_04772	_GSYETGYGGPPSGPS[Phospho (STY)]PGR_	-	hypothetical protein	6.1257	0.0406631		CNAG_01208	CCH1	calcium-channel protein CCH1	1
CNAG_00693	_VPS[Phospho (STY)]PEHLK_	CDC4	F-box and WD-40 domain-containing protein CDC4, variant	6.12387	0.0447133		CNAG_00556	CCK1	Casein kinase I	1
CNAG_03135	_S[Phospho (STY)]FRSPHDQY[Phospho (STY)]PSPQR_	-	hypothetical protein	6.12306	0.0285049		CNAG_06647	CDC1	hypothetical protein	1
LHP1	_MSVPVLVS[Phospho (STY)]PTSATSAVAGIPPK_	#N/A	#N/A	6.11957	0.0194998		CNAG_04939	CDC14	CDC14 domain-containing protein	1
CNAG_07595	_GPMT[Phospho (STY)]PTSLPTR_	-	hypothetical protein	6.11649	0.0462732		CNAG_01664	CDC28	CMGC/CDK/CDC2 protein kinase	1
CNAG_03768	_HMS[Phospho (STY)]LPPSR_	FZC32	hypothetical protein, variant	6.11478	0.0296323		CNAG_05925	CDC3	septin ring protein	1
CNAG_06160	_GFS[Phospho (STY)]ETGR_	-	guanyl nucleotide exchange factor Sql2	6.11032	0.0183312		CNAG_02936	CDC39	CCR4-NOT transcription complex subunit 1	1
CNAG_04587	_SHTSSPVLPNFGSS[Phospho (STY)]LPPSRR_	-	hypothetical protein, variant	6.10113	0.00872928		CNAG_00693	CDC4	F-box and WD-40 domain-containing protein CDC4, variant	1
CNAG_06327	_AITAPPSRATS[Phospho (STY)]PVHSISR_	MIG1	DNA-binding protein creA, variant	6.09946	0.0266396		CNAG_04191	CEX1	SCYL protein kinase	1
YOR1	_NT[Phospho (STY)]KVLVLDEATASVDLETDAK_	#N/A	#N/A	6.09468	0.0111772		CNAG_04408	CKI1	choline kinase	1
CNAG_05469	_GIWGGPIVPGRFT[Phospho (STY)]PAPLGAAPR_	HRD1	E3 ubiquitin-protein ligase synoviolin	6.09333	0.0336684		CNAG_04353	CLR1	hypothetical protein, variant	1
CNAG_04697	_NLSLGFVPLVQT[Phospho (STY)]GR_	-	zinc finger protein	6.08742	0.0323156		CNAG_03621	CPA2	Cyclophilin A	1
CNAG_01199	_PAEAPKPAAGGFSFGNLGSKPAT[Phospho (STY)]PSTTEAPK_	-	nuclear pore complex protein Nup62	6.0864	0.0155474		CNAG_03526	CTF8	chromosome transmission fidelity protein 8	1
CNAG_06916	_ATTGTFAGYQPFM[Oxidation (M)]GKISPVSS[Phospho (STY)]AQYR_	-	hypothetical protein	6.0817	0.00902857		CNAG_04118	CTK1	CMGC/CDK/CRK7 protein kinase	1
CNAG_02796	_LREEASSSSSSSPY[Phospho (STY)]PHSPVR_	-	3-deoxy-7-phosphoheptulonate synthase	6.0814	0.0162646		CNAG_05533	CUE1	hypothetical protein	1
CNAG_02941	_EDFEKPS[Phospho (STY)]EIDGFDEIPEEYQQK_	LPI17	hypothetical protein	6.08097	0.0377238		CNAG_05148	CXT1	beta-1,2-xylosyltransferase 1	1
CNAG_01179	_PS[Phospho (STY)]PLDNTRR_	-	DNA-directed RNA polymerase I and III subunit RPAC1	6.0802	0.0333814		CNAG_06603	DUG2	di- and tripeptidase	1
CNAG_02820	_AAAASLSRGNS[Phospho (STY)]QSLR_	PKH201	serine/threonine protein kinase	6.07971	0.0296277		CNAG_03940	ELP2	elongator complex protein 2	1
CNAG_05568	_VVLAS[Phospho (STY)]ASPR_	PRY1	septum formation protein Maf	6.07595	0.0454678		CNAG_03796	ENV7	NAK protein kinase	1
CNAG_05843	_PISPRPLSANS[Phospho (STY)]HR_	-	translation initiation factor 4E	6.07494	0.033476		CNAG_02084	ERG20	farnesyl diphosphate synthase	1
CNAG_04949	_TNYQPLAT[Phospho (STY)]SPTVADAVESQQHR_	-	hypothetical protein	6.06966	0.0149479		CNAG_03819	ERG6	sterol 24-C-methyltransferase	1
CNAG_03659	_ALRPTPTHVSDST[Phospho (STY)]DDIFMLDAR_	-	DNA replication regulator DPB11	6.06948	0.0144726		CNAG_03826	ESA1	histone acetyltransferase esa1	1
CNAG_02432	_QPSHFPYQPQTPT[Phospho (STY)]TPASPASPR_	-	hypothetical protein, variant	6.068	0.0196444		CNAG_04023	EZT1	hypothetical protein	1
CNAG_00897	_LSDSSFTSFDHPGMS[Phospho (STY)]HR_	SKN1	putative glucosidase	6.06083	0.0202272		CNAG_00073	FAR8	nuclear mRNA splicing protein	1
CNAG_06125	_QTVAVGVIKS[Phospho (STY)]VEKSDGK_	TEF1	elongation factor 1-alpha	6.05955	0.0203138		CNAG_06770	FBA1	fructose-bisphosphate aldolase 1	1
CNAG_01126	_QQAGARPPS[Phospho (STY)]AVQEHRSR_	-	guanine nucleotide exchange protein for ADP- robosylation factor	6.05942	0.0212463		CNAG_05280	FBP1	F-box and leucine-rich repeat protein GRR1	1
PTP2	_RPSLASVQT[Phospho (STY)]SSDRVSSESISSC[Carbamidomethyl (C)]LADPEPVTFSNR_	#N/A	#N/A	6.05825	0.0334833		CNAG_04120	FCP1	RNA polymerase II subunit A domain phosphatase	1
CNAG_01574	_ASPIFGAIGTPGSQGSTIYPHGASIDT[Phospho (STY)]LR_	-	hypothetical protein	6.0576	0.00863388		CNAG_00613	FCY1	Cytosine deaminase	1
CNAG_06560	_VQTAVPT[Phospho (STY)]AFTLSPPPNPR_	-	esterase	6.0571	0.0246153		CNAG_07770	FRE1	ferric-chelate reductase	1
CNAG_03771	_GGAGQGVWNLEDGET[Phospho (STY)]NGGKGVSDYVDQDGDRTSVNR_	-	DNA binding protein Ncp1, variant	6.05474	0.0270733		CNAG_00670	FZC12	hypothetical protein, variant	1
CNAG_05907	_PGT[Phospho (STY)]PNVPGTPAIPHTITGLR_	-	pyruvate carboxylase	6.05431	0.0146957		CNAG_05255	FZC2	hypothetical protein	1
CNAG_03135	_VQIGQGSPARQGAFT[Phospho (STY)]SSGISGTVPER_	-	hypothetical protein	6.05199	0.0345404		CNAG_03086	FZC20	hypothetical protein	1
CNAG_03655	_GVMAESQFANLPPLPPPPATPTAAGDTTPT[Phospho (STY)]KK_	-	hypothetical protein, variant	6.04998	0.0495135		CNAG_04594	FZC27	hypothetical protein	1
CNAG_00311	_HLS[Phospho (STY)]SSSQMTVPREELVLFESQQDTR_	-	3-hydroxyisobutyryl-CoA hydrolase	6.0495	0.020303		CNAG_06339	FZC35	hypothetical protein	1
CNAG_01587	_STGTSASGSRSPHPLEY[Phospho (STY)]VEEDEAVPQR_	-	RNA polymerase-associated protein LEO1	6.04777	0.0264711		CNAG_00830	FZC38	hypothetical protein	1
CNAG_07477	_RSSIGS[Phospho (STY)]LTTMTSSDDAEK_	-	hypothetical protein, variant	6.04271	0.030203		CNAG_05380	FZC44	hypothetical protein	1
CNAG_07478	_NPESETSNAQPTPTINPPSLPSSTPS[Phospho (STY)]TNTRPISR_	-	hypothetical protein	6.04195	0.025594		CNAG_03431	FZC48	nuclear protein	1
CNAG_04496	_ALPS[Phospho (STY)]PVSHKDFAEVTVK_	-	rab GTPase activator	6.04077	0.0285256		CNAG_06097	FZC52	hypothetical protein	1
CNAG_00539	_AVS[Phospho (STY)]LTDS[Phospho (STY)]DGDHDHITR_	-	membrane transporter	6.03456	0.0355088		CNAG_00018	FZC6	hypothetical protein	1
CNAG_00396	_QVQS[Phospho (STY)]PVSR_	PKA1	AGC/PKA protein kinase	6.03311	0.0258675		CNAG_00193	GAT1	GATA type zinc finger protein asd-4	1
CNAG_05301	_EIDS[Phospho (STY)]VPEITAK_	CRN1	Coronin-like protein CRN1, putative	6.03245	0.0114984		CNAG_00375	GCN5	histone acetyltransferase	1
PIF1	_NWGEEDGPESSQLDWS[Phospho (STY)]PS[Phospho (STY)]PEVVQR_	#N/A	#N/A	6.03159	0.0212096		CNAG_05050	GCS2	ADP-ribosylation factor GTPase-activating protein 1	1
CNAG_06607	_EPS[Phospho (STY)]PAPVIAPK_	POL1	DNA polymerase alpha subunit A	6.03128	0.0438406		CNAG_03426	GMT2	GDP-mannose transporter 2	1
CNAG_01023	_RATTELLT[Phospho (STY)]PPPPTPPQESISDLTPR_	SCC1	cohesin complex subunit SCC1	6.03127	0.00755556		CNAG_06699	GPD1	glyceraldehyde-3-phosphate dehydrogenase	1
CNAG_01489	_VKPPTPVEGEDTT[Phospho (STY)]QFELMVAGKPYLAMDK_	CAS9	maltose O-acetyltransferase	6.03054	0.0118808		CNAG_01155	GUT1	glycerol kinase	1
CNAG_02458	_VLPPPPS[Phospho (STY)]PLK_	-	GTPase activating protein	6.02288	0.0454316		CNAG_05809	HEM15	ferrochelatase	1
CNAG_07817	_SHSISHSPTES[Phospho (STY)]PAIATPAK_	-	centromeric protein E	6.01842	0		CNAG_04347	HOM3	Aspartate kinase	1
CNAG_00337	_HWEPAIFSGLLGLFASGNM[Oxidation (M)]PS[Phospho (STY)]PAALPADR_	-	hypothetical protein	6.01546	0.0441768		CNAG_02727	HOS4	similar to Avo2, Tor2 kinase component	1
CNAG_03677	_[Acetyl (Protein N-term)]AAVTST[Phospho (STY)]PTEVPQFQIVSK_	-	hypothetical protein	6.01435	0.0115479		CNAG_05469	HRD1	E3 ubiquitin-protein ligase synoviolin	1
CNAG_04279	_TPY[Phospho (STY)]ARPTPQR_	-	hypothetical protein	6.01425	0.0447405		CNAG_01446	HSP12	heat shock protein, 12Kda	1
CNAG_00018	_Y[Phospho (STY)]DNPMGPMSGRPSTPDTTQQDAYEYSK_	FZC6	hypothetical protein	6.01147	0.0372229		CNAG_05098	HUB1	ubiquitin-like protein 5	1
CNAG_02319	_QYS[Phospho (STY)]FTQR_	-	hypothetical protein	6.01141	0.0168485		CNAG_02109	INP5201	type I inositol-1,4,5-trisphosphate 5- phosphatase 1	1
CNAG_02606	_FTTSTNAFGLTSSPS[Phospho (STY)]SSSSSQR_	-	hypothetical protein	6.00867	0.0473193		CNAG_02001	INP5203	inositol-polyphosphate 5-phosphatase	1
CNAG_00044	_APDMVS[Phospho (STY)]PK_	-	ribosome assembly protein 1	6.00723	0.013192		CNAG_07359	IRK1	Atypical/ABC1/ABC1-C protein kinase	1
CNAG_04051	_S[Phospho (STY)]STPDNAPFGTFK_	-	ATP-dependent RNA helicase A	6.00666	0.0305624		CNAG_00405	KIC1	ste/ste20/ysk protein kinase	1
CNAG_01082	_QHLS[Phospho (STY)]S[Phospho (STY)]S[Phospho (STY)]RPNS[Phospho (STY)]PIENHSPTSPGKPR_	-	hypothetical protein	6.00264	0.0346198		CNAG_01938	KIN1	CAMK/CAMKL/KIN1 protein kinase	1
CNAG_00405	_DLLKLS[Phospho (STY)]PAVPDMPDLLPPSPSVANTPHK_	KIC1	ste/ste20/ysk protein kinase	5.99986	0.0220418		CNAG_01905	KSP1	serine/threonine protein kinase	1
CNAG_07745	_SGDWPVPPSHPLIGGHEGVGIIVAIGDHTAAS[Phospho (STY)]PVK_	MPD1	alcohol dehydrogenase, propanol-preferring	5.99971	0.0158496		CNAG_05692	LCB3	sphingosine-1-phosphate phosphatase	1
CNAG_00039	_RHSNTQPTT[Phospho (STY)]PDTTGQPEVR_	ZFC6	hypothetical protein	5.99864	0.0217187		CNAG_06765	LMP1	Low mating performance protein	1
CNAG_02108	_FPS[Phospho (STY)]IISPR_	-	GTPase activating protein	5.99842	0.00946502		CNAG_02941	LPI17	hypothetical protein	1
CNAG_06178	_RHSSVSTT[Phospho (STY)]SEHPR_	-	hypothetical protein	5.9983	0.0266845		CNAG_07580	LPI7	CAMK protein kinase	1
CNAG_03319	_DETGFVYSDESEDEEEDFGKGLPLVT[Phospho (STY)]K_	-	phospholipid binding protein	5.9923	0.0111277		CNAG_05703	LRG1	rho GTPase activator	1
CNAG_04433	_TPS[Phospho (STY)]MPHNMASPSSR_	YAK103	CMGC/DYRK/DYRK2 protein kinase	5.99215	0.0373596		CNAG_05773	MET30	F-box and WD-40 domain-containing protein MET30	1
CNAG_00148	_FAMMGPANWQETEQAPPPLTAGPGATLAPVASRS[Phospho (STY)]PALQAQSAMSENAAR_	-	hypothetical protein	5.99143	0.0111631		CNAG_01890	MET6	5-methyltetrahydropteroyltriglutamate- homocysteine S-methyltransferase	1
CNAG_02930	_STPTFDSRPGNGRTT[Phospho (STY)]PTLK_	LIV10	virulence related protein of unknown function	5.99116	0.0112776		CNAG_04837	MLN1	bHLH family transcription factor	1
CNAG_00539	_AVSLTDS[Phospho (STY)]DGDHDHITR_	-	membrane transporter	5.98967	0.0256604		CNAG_00031	MLR1	hypothetical protein	1
CNAG_02789	_YQVPENLISDS[Phospho (STY)]TAEEARSPSK_	-	nitrogen permease regulator 2	5.98928	0.0303683		CNAG_06697	MPS1	TTK protein kinase, variant	1
AFR1	_YSNLSQRSQHELHRPT[Phospho (STY)]T[Phospho (STY)]R_	#N/A	#N/A	5.98868	0.0143289		CNAG_04334	MRPS18	hypothetical protein	1
CNAG_07329	_TPTDSVGKS[Phospho (STY)]PLKLSDVLK_	-	hypothetical protein	5.98759	0.0111671		CNAG_00770	MSH2	DNA mismatch repair protein Msh2	1
CNAG_00830	_IS[Phospho (STY)]SSHSPNYENMTGERER_	FZC38	hypothetical protein	5.98724	0.0258024		CNAG_06971	MYO2alpha	myosin class v heavy chain	1
CNAG_06158	_RTSSY[Phospho (STY)]SGSSTIR_	-	hypothetical protein	5.98223	0.0358573		CNAG_03935	NEP1	endothelin-converting enzyme	1
CNAG_02065	_QPPLARPLMDS[Phospho (STY)]PEASAR_	-	hypothetical protein, variant	5.98026	0.0143373		CNAG_01678	NHA1	Na /H exchanger AnNHA1	1
CNAG_02568	_S[Phospho (STY)]RSPGS[Phospho (STY)]PLGGIK_	-	UBA/TS-N domain-containing protein	5.98025	0.0385722		CNAG_05359	NSE1	hypothetical protein	1
CNAG_03563	_LGTDYYVIDKFPVS[Phospho (STY)]ARPFYTANDGK_	-	aspartate-tRNA(Asn) ligase	5.97968	0.00988142		CNAG_02130	NSR1	RNA-binding protein 39	1
[truncated: 1,461 more rows]

## Sheet: Cac1_ko_m_down
Locus_tag	site	Gene name	Function	log2FC	padj		Locus_tag	Gene name	Function	number
[truncated: 1,990 more rows]

[truncated: 12 more sheets: Cac1_AC_m_up, Cac1_AC_m_down, Cac1_PP_m_up, Cac1_PP_m_down, Cac1_comple_m_significant, Cac1_ko_g_up, Cac1_ko_g_down, Cac1_PP_g_up, Cac1_PP_g_down, Cac1_AC_g_up, Cac1_AC_g_down, Cac1_comple_g_significant]
